# Supplementary material
Source: Research Square preprint supplement (doi:10.21203/rs.3.rs-9323973/v1)
Supplement: Supplementary file 1 [file 42297e6d4dd9b8dd57b20af6.xlsx]

## Sheet: Sheet1
Supplementary table S3. The significantly different putative metabolites from late RABV infection (ranked by smallest adjusted p-value)
No.	Ionization mode	Average RT (min)	Average MZ	Metabolite name	Adduct type	Chemical formula	Ontology	INCHIKEY	SMILES	Fold change	Adjusted p-value	VIP score from oPLS-DA model
1	Negative	0.077	195.802	Unknown	[M-H]-	null	null	null	null	0.070869	5.7e-13	2.75991
2	Negative	0.078	197.799	Unknown	[M-H]-	null	null	null	null	0.069888	5.7e-13	2.77628
3	Negative	0.079	160.835	Unknown	[M-H]-	null	null	null	null	0.062835	2.07e-12	2.81117
4	Negative	0.079	162.831	Unknown	[M-H]-	null	null	null	null	0.063331	2.07e-12	2.81378
5	Negative	0.077	199.796	Unknown	[M-H]-	null	null	null	null	0.067356	4.51e-12	2.74553
6	Negative	0.379	153.862	Unknown	[M-H]-	null	null	null	null	0.3374	2.77e-07	2.2675
7	Positive	10.115	606.417	Unknown	[M+H]+	null	null	null	null	18.835	4.43e-07	2.09123
8	Negative	9.106	556.29	Unknown	[M-H]-	null	null	null	null	2.012	4.51e-07	2.06783
9	Negative	14.209	195.802	Unknown	[M-H]-	null	null	null	null	0.48678	9.68e-07	1.77142
10	Positive	11.964	441.281	Unknown	[M+H]+	null	null	null	null	0.1035	1.28e-06	2.21542
11	Negative	6.567	609.295	Unknown	[M-H]-	null	null	null	null	2.0215	1.6e-06	1.82434
12	Positive	1.15	154.068	no MS2: CREATINE	[M+Na]+	C4H9N3O2	Alpha amino acids and derivatives	CVSVTCORWBXHQV-UHFFFAOYSA-N	CN(CC(O)=O)C(N)=N	0.39381	1.89e-06	2.00045
13	Positive	10.034	662.448	Unknown	[M+H]+	null	null	null	null	14.051	2.23e-06	1.67308
14	Negative	12.337	303.22	low score: Aleuretic Acid	[M-H]-	C16H32O5	Long-chain fatty acids	MEHUJCGAYMDLEL-LSDHHAIUSA-N	O=C(O)CCCCCCCC(O)C(O)CCCCCCO	2.1432	4.27e-06	1.76343
15	Positive	1.077	154.071	no MS2: Hypoxanthine	[M+NH4]+	C5H4N4O	Hypoxanthines	FDGQSTZJBFJUBT-UHFFFAOYSA-N	OC1=NC=NC=2NC=NC12	0.39743	5.15e-06	1.87761
16	Positive	9.513	317.147	no MS2: Loureirin B	[M+H]+	C18H20O5	Retro-dihydrochalcones	ZPFRAPVRYLGYEC-UHFFFAOYSA-N	O=C(C1=CC=C(O)C=C1)CCC=2C(OC)=CC(OC)=CC2OC	0.29253	8.46e-06	1.92245
17	Negative	0.393	155.859	Unknown	[M-H]-	null	null	null	null	0.49249	8.98e-06	1.97684
18	Positive	12.161	822.599	Unknown	[M+H]+	null	null	null	null	3.9253	1.45e-05	1.65471
19	Positive	11.512	704.502	Unknown	[M+H]+	null	null	null	null	7.9551	1.47e-05	1.89065
20	Positive	14.379	783.661	Unknown	[M+H]+	null	null	null	null	0.2003	2.17e-05	2.25565
21	Positive	13.601	153.128	10-HYDROXYDECANOATE	[M-2H2O+H]+	C10H20O3	Medium-chain hydroxy acids and derivatives	YJCJVMMDTBEITC-UHFFFAOYSA-N	C(CCCCC(=O)O)CCCCO	3.4788	2.19e-05	2.08982
22	Positive	9.1	317.146	no MS2: Loureirin B	[M+H]+	C18H20O5	Retro-dihydrochalcones	ZPFRAPVRYLGYEC-UHFFFAOYSA-N	O=C(C1=CC=C(O)C=C1)CCC=2C(OC)=CC(OC)=CC2OC	0.31233	2.31e-05	2.06991
23	Positive	14.421	782.666	Unknown	[M+H]+	null	null	null	null	0.22055	2.31e-05	1.91283
24	Positive	14.569	783.665	Unknown	[M+H]+	null	null	null	null	0.19507	2.31e-05	2.34292
25	Positive	11.802	824.62	Unknown	[M+H]+	null	null	null	null	23.808	2.91e-05	1.48955
26	Positive	17.31	367.35	low score: Nervonic Acid	[M+H]+	C24H46O2	Very long-chain fatty acids	GWHCXVQVJPWHRF-KTKRTIGZSA-N	O=C(O)CCCCCCCCCCCCCC=CCCCCCCCC	0.1837	3.56e-05	1.9693
27	Negative	8.172	528.262	low score: 2-[(4S,5S,5aS,9aS)-4-methoxy-6,6,9a-trimethyl-5-[(2E,4E,6E)-octa-2,4,6-trienoyl]oxy-1-oxo-4,5,5a,7,8,9-hexahydro-3H-benzo[e]isoindol-2-yl]pentanedioic acid	[M-H]-	C29H39NO8	Glutamic acid and derivatives	FXPWZCUQBSEHTH-QZRFOHQJSA-N	O=C(OC1C(OC)C2=C(C(=O)N(C2)C(C(=O)O)CCC(=O)O)C3(C)CCCC(C)(C)C13)C=CC=CC=CC	2.1681	3.56e-05	1.6412
28	Negative	13.774	281.236	Unknown	[M-H]-	null	null	null	null	2.0099	3.83e-05	1.92624
29	Negative	0.356	516.927	Unknown	[M-H]-	null	null	null	null	2.4059	3.9e-05	1.60838
30	Positive	11.966	425.303	Unknown	[M+H]+	null	null	null	null	0.1333	4.19e-05	1.80824
31	Positive	15.52	780.622	Unknown	[M+H]+	null	null	null	null	0.19261	4.58e-05	1.8983
32	Positive	12.633	904.668	Unknown	[M+H]+	null	null	null	null	0.12147	4.58e-05	1.86407
33	Positive	8.783	582.352	low score: NCGC00381175-01!3-hydroxy-2-[[3-[3-(3-hydroxy-6-methylheptanoyl)oxy-6-methylheptanoyl]oxy-8-methylnonanoyl]amino]propanoic acid	[M+Na]+	C29H53NO9	N-acyl-alpha amino acids	MWZPHNZNPKKSEI-UHFFFAOYSA-N	CC(C)CCCCC(CC(=O)NC(CO)C(O)=O)OC(=O)CC(CCC(C)C)OC(=O)CC(O)CCC(C)C	0.19174	4.86e-05	2.02343
34	Positive	18.673	829.634	Unknown	[M+H]+	null	null	null	null	0.14712	5.1e-05	1.686
35	Positive	0.148	726.602	Unknown	[M+H]+	null	null	null	null	0.14732	5.38e-05	2.13791
36	Negative	7.818	449.152	low score: 1-[2,4-dihydroxy-6-[(2S,3R,4S,5S,6R)-3,4,5-trihydroxy-6-(hydroxymethyl)oxan-2-yl]oxyphenyl]-3-(4-methoxyphenyl)propan-1-one	[M-H]-	C22H26O10	Flavonoid O-glycosides	GOTAZLUFLPHQJU-MIUGBVLSSA-N	O=C(C=1C(O)=CC(O)=CC1OC2OC(CO)C(O)C(O)C2O)CCC3=CC=C(OC)C=C3	2.5829	5.85e-05	1.78376
37	Positive	11.247	457.319	low score: Nakijiquinone H	[M+H]+	C26H40N4O3	Prenylquinones	UOJQVKJSJVULOG-UHFFFAOYSA-N	CC1=CCCC2C1(C)CCC(C)C2(C)CC3=C(O)C(C=C(NCCCCNC(N)=N)C3=O)=O	0.38418	5.97e-05	1.79316
38	Positive	9.053	302.172	low score: Dobutamine	[M+H]+	C18H23NO3	Catecholamines and derivatives	JRWZLRBJNMZMFE-UHFFFAOYSA-N	[H]Oc(c([H])2)c([H])c([H])c(c([H])2)C([H])([H])C([H])([H])C([H])(C([H])([H])[H])N([H])C([H])([H])C([H])([H])c(c([H])1)c([H])c(O[H])c(O[H])c([H])1	0.41604	6.32e-05	1.76745
39	Positive	1.113	247.038	no MS2: Fonofos	[M+2Na-H]+	C10H15OPS2	Benzene and substituted derivatives	KVGLBTYUCJYMND-UHFFFAOYSA-N	S=P(Sc1ccccc1)(OCC)CC	2.5953	8.35e-05	1.70625
40	Positive	9.994	622.414	Unknown	[M+H]+	null	null	null	null	9.0631	8.35e-05	1.58633
41	Positive	14.537	830.646	Unknown	[M+H]+	null	null	null	null	0.19316	8.44e-05	2.0467
42	Negative	1.118	310.134	no MS2: Tolazamide	[M-H]-	C14H21N3O3S	Benzenesulfonamides	OUDSBRTVNLOZBN-UHFFFAOYSA-N	CC1=CC=C(C=C1)S(=O)(=O)NC(=O)NN1CCCCCC1	0.38327	8.68e-05	1.6719
43	Positive	12.329	468.444	Unknown	[M+H]+	null	null	null	null	0.30217	8.74e-05	1.98402
44	Positive	13.485	783.643	Unknown	[M+H]+	null	null	null	null	0.26843	9e-05	1.96229
45	Positive	10.127	676.468	Unknown	[M+H]+	null	null	null	null	6.4568	9.42e-05	1.46422
46	Positive	19.816	955.656	low score: (30E,34E)-2,6,10,14,18,22,26,30,34-nonamethyl-36-[(2R,3R,4S,5S,6R)-3,4,5-trihydroxy-6-(hydroxymethyl)oxan-2-yl]oxyhexatriaconta-2,30,34-triene-6,10,14,18,22,26,27-heptol	[M+K]+	C51H96O13	Polyterpenoids	MONOOAYGIBRELN-REQVTYDXSA-N	OCC1OC(OCC=C(C)CCC=C(C)CCC(O)C(O)(C)CCCC(O)(C)CCCC(O)(C)CCCC(O)(C)CCCC(O)(C)CCCC(O)(C)CCC=C(C)C)C(O)C(O)C1O	0.1442	9.42e-05	1.9314
47	Positive	1.302	612.258	Unknown	[M+H]+	null	null	null	null	0.30639	9.46e-05	1.73894
48	Negative	0.194	155.858	Unknown	[M-H]-	null	null	null	null	0.33424	9.51e-05	1.83929
49	Positive	8.779	523.411	Unknown	[M+H]+	null	null	null	null	0.22951	9.58e-05	2.18082
50	Negative	1.489	594.198	Unknown	[M-H]-	null	null	null	null	0.14432	0.00010433	1.42531
51	Positive	9.414	437.41	Unknown	[M+H]+	null	null	null	null	0.16778	0.00011359	1.75798
52	Positive	12.376	393.278	Unknown	[M+H]+	null	null	null	null	0.17804	0.00011901	2.08068
53	Positive	9.496	540.414	Unknown	[M+H]+	null	null	null	null	0.23659	0.00012411	2.09893
54	Negative	0.355	518.927	Unknown	[M-H]-	null	null	null	null	2.1774	0.00012411	1.50221
55	Positive	9.254	722.473	Unknown	[M+H]+	null	null	null	null	20.808	0.00012713	1.38639
56	Positive	10.225	690.484	Unknown	[M+H]+	null	null	null	null	13.071	0.00013177	1.5343
57	Positive	13.499	774.624	Unknown	[M+H]+	null	null	null	null	3.1779	0.00013177	1.4365
58	Positive	18.087	758.652	Unknown	[M+H]+	null	null	null	null	0.19603	0.00013291	2.17481
59	Positive	12.145	822.639	Unknown	[M+H]+	null	null	null	null	3.6566	0.0001343	1.25972
60	Positive	0.702	282.053	low score: 4,5-Dichloro-2-n-octyl-3(2H)-isothiazolone (DCOIT)	[M+H]+	C11H17Cl2NOS	Aryl chlorides	PORQOHRXAJJKGK-UHFFFAOYSA-N	O=c1c(Cl)c(Cl)sn1CCCCCCCC	3.8155	0.00013502	1.55083
61	Positive	13.475	393.237	low score: monolinolein	[M+K]+	C21H38O4	Lineolic acids and derivatives	WECGLUPZRHILCT-HZJYTTRNSA-N	O=C(OCC(O)CO)CCCCCCCC=CCC=CCCCCC	0.30717	0.00014275	1.64697
62	Positive	18.622	708.578	Unknown	[M+H]+	null	null	null	null	0.17789	0.00015234	2.01218
63	Positive	13.021	403.317	low score: "(3R,7R,8R,9S,10S,12S,13R,14S,17R)-17-((2R,5R)-5,7-dihydroxyheptan-2-yl)-10,13-dimethylhexadecahydro-1H-cyclopenta[a]phenanthrene-3,7,12-triol"	[M-2H2O+H]+	C26H46O5	Tetrahydroxy bile acids, alcohols and derivatives	PBXYLMVLLSYZLN-LQHTUWPVSA-N	O[C@@H](C1)CC[C@@]2(C)C1([H])C[C@@H](O)[C@]3([H])[C@]2([H])C[C@H](O)[C@@]4(C)[C@@]3([H])CC[C@@]4([C@H](C)CC[C@@H](O)CCO)[H]	0.20863	0.00015234	1.81418
64	Positive	1.113	318.912	Unknown	[M+H]+	null	null	null	null	2.562	0.00015875	1.35772
65	Positive	12.221	401.301	Unknown	[M+H]+	null	null	null	null	0.17276	0.00015875	1.60259
66	Positive	10.359	636.433	Unknown	[M+H]+	null	null	null	null	8.0892	0.00016011	1.4725
67	Negative	7.056	599.23	Unknown	[M-H]-	null	null	null	null	0.07669	0.00016031	1.68153
68	Negative	6.712	678.183	Unknown	[M-H]-	null	null	null	null	0.06574	0.00016799	1.71962
69	Positive	8.751	997.71	Unknown	[M+H]+	null	null	null	null	0.19997	0.00017016	1.67066
70	Positive	13.484	782.638	Unknown	[M+H]+	null	null	null	null	0.301	0.00017257	1.87106
71	Positive	11.021	317.148	low score: MMV392832	[M+H]+	C19H16N4O	Phenylpyrroles	SCLHBVYXOLVAFF-UHFFFAOYSA-N	N=1C=CC=C(C1)NC2=NC=CC=3NC(=CC23)C4=CC=CC(OC)=C4	0.30022	0.00017472	1.79907
72	Positive	1.143	131.049	no MS2: TRANS-CINNAMATE	[M+H-2H2O]+	C9H8O2	Cinnamic acids	WBYWAXJHAXSJNI-VOTSOKGWSA-N	OC(=O)\C=C\C1=CC=CC=C1	2.3771	0.00018319	1.46087
73	Positive	16.122	780.621	Unknown	[M+H]+	null	null	null	null	0.19555	0.00018319	1.90933
74	Positive	10.864	842.104	Unknown	[M+H]+	null	null	null	null	0.17546	0.00018319	2.11563
75	Positive	16.712	780.624	Unknown	[M+H]+	null	null	null	null	0.19837	0.00018839	1.94553
76	Positive	12.928	782.638	Unknown	[M+H]+	null	null	null	null	0.31256	0.00019605	1.83141
77	Positive	10.383	622.45	Unknown	[M+H]+	null	null	null	null	6.905	0.00019762	1.51041
78	Negative	0.911	307.136	low score: Caffeoyl lysine	[M-H]-	C15H20N2O5	Hydroxycinnamic acids and derivatives	WVFMZTORJFNZPK-UHFFFAOYSA-N	NC(CCCCNC(=O)C=CC1=CC(O)=C(O)C=C1)C(O)=O	0.21954	0.00019962	1.44229
79	Negative	8.046	657.298	Unknown	[M-H]-	null	null	null	null	0.41733	0.00020532	1.48493
80	Positive	14.962	667.536	Unknown	[M+H]+	null	null	null	null	0.20678	0.00020555	1.48749
81	Positive	12.918	804.624	Unknown	[M+H]+	null	null	null	null	0.30232	0.00021384	1.77837
82	Negative	0.194	153.861	Unknown	[M-H]-	null	null	null	null	0.3513	0.00021384	1.82815
83	Negative	19.871	199.801	Unknown	[M-H]-	null	null	null	null	0.455	0.00021384	1.69003
84	Positive	9.782	580.409	Unknown	[M+H]+	null	null	null	null	5.8671	0.00021851	1.55895
85	Positive	14.308	806.646	Unknown	[M+H]+	null	null	null	null	0.38916	0.00022179	1.79426
86	Negative	6.743	599.239	Unknown	[M-H]-	null	null	null	null	0.060766	0.00022179	1.81101
87	Positive	9.01	586.363	Unknown	[M+H]+	null	null	null	null	0.25511	0.00022311	1.58262
88	Positive	18.519	708.576	Unknown	[M+H]+	null	null	null	null	0.20739	0.00023046	1.8399
89	Negative	7.04	642.126	Unknown	[M-H]-	null	null	null	null	0.065798	0.00023046	1.75344
90	Positive	9.504	239.185	Unknown	[M+H]+	null	null	null	null	0.47815	0.00024087	1.5782
91	Negative	1.277	648.128	Unknown	[M-H]-	null	null	null	null	0.021089	0.00024842	1.56115
92	Negative	7.818	451.15	low score: methyl (1R,4aS,9S,10S)-10-acetyloxy-5,9-dihydroxy-1,4a-dimethyl-2-oxo-7-propan-2-yl-10,10a-dihydro-9H-phenanthrene-1-carboxylate	[M+Cl]-	C23H28O7	1-hydroxysteroids	ROWKODQLOIEBHL-MXHWVDEXSA-N	O=C(OC1C(O)C2=CC(=CC(O)=C2C3(C=CC(=O)C(C(=O)OC)(C)C13)C)C(C)C)C	2.3229	0.00025698	1.75848
93	Negative	11.465	413.224	low score: Unknown (carbon number 21); PlaSMA ID-1051	[M-H]-	C21H34O8	Unknown	null	null	0.37614	0.00025797	1.45971
94	Positive	9.288	666.444	Unknown	[M+H]+	null	null	null	null	17.016	0.00026821	1.64311
95	Positive	8.791	610.367	low score: NCGC00386067-01!2-[2-(19-acetamido-16,18-dihydroxy-5,9-dimethyl-6-oxoicosan-7-yl)oxy-2-oxoethyl]butanedioic acid [IIN-based on: CCMSLIB00000846988]	[M+Na]+	C30H53NO10	Tricarboxylic acids and derivatives	CYKDMNNWBMLNSF-UHFFFAOYSA-N	CCCCC(C)C(=O)C(CC(C)CCCCCCC(O)CC(O)C(C)NC(C)=O)OC(=O)CC(CC(O)=O)C(O)=O	0.24951	0.00028431	1.79938
96	Positive	1.162	359.059	no MS2: barceloneic acid A	[M+K]+	C16H16O7	Diphenylethers	ULPVIBVOKQAXJB-UHFFFAOYSA-N	O=C(O)C1=C(O)C=C(C=C1OC2=C(O)C=C(OC)C=C2CO)C	4.4116	0.00028737	1.72412
97	Positive	11.264	375.284	low score: NCGC00380376-01_C22H40O3_1-Naphthalenepentanol, decahydro-2-hydroxy-gamma,2,5,5,8a-pentamethyl-, alpha-acetate	[M+Na]+	C22H40O3	Diterpenoids	NZKLGQRMNDHSPV-UHFFFAOYSA-N	CC(CCOC(C)=O)CCC1C(C)(O)CCC2C(C)(C)CCCC12C	0.21013	0.00028737	1.7659
98	Positive	14.539	782.638	Unknown	[M+H]+	null	null	null	null	0.28137	0.0002926	1.9903
99	Positive	11.823	806.613	Unknown	[M+H]+	null	null	null	null	3.3281	0.0002926	1.91718
100	Positive	9.93	676.466	Unknown	[M+H]+	null	null	null	null	15.912	0.00029338	1.88268
101	Positive	11.277	353.3	Unknown	[M+H]+	null	null	null	null	0.25431	0.00029634	1.67112
102	Positive	18.316	512.55	Unknown	[M+H]+	null	null	null	null	0.15544	0.00030834	1.96717
103	Positive	1.438	132.101	Isoleucine	[M+H]+	C6H13NO2	Isoleucine and derivatives	AGPKZVBTJJNPAG-UHFFFAOYSA-N	CCC(C)C(C(=O)O)N	0.3355	0.0003128	1.94531
104	Negative	7.036	634.194	Unknown	[M-H]-	null	null	null	null	0.11661	0.0003167	1.68308
105	Positive	10.272	399.286	low score: Geranylgeranyl 1,4-hydroquinone	[M+H]+	C26H38O3	Diterpenoids	MYSSQNMFYDHCAT-FLPKSHQQSA-N	OC1=C(C/C=C(CC/C=C(C)/CC/C=C(C)/CC/C=C(C)\C)\C)C=C(O)C=C1O	0.41511	0.00031743	1.71672
106	Positive	15.256	579.484	Unknown	[M+H]+	null	null	null	null	0.20777	0.00031743	1.31492
107	Negative	6.572	592.201	Unknown	[M-H]-	null	null	null	null	0.36727	0.00031904	1.37382
108	Positive	10.085	616.223	low score: 5,7-dihydroxy-7-methyl-1-[(2S,3R,4S,5S,6R)-3,4,5-trihydroxy-6-[[(E)-3-(4-hydroxy-3,5-dimethoxyphenyl)prop-2-enoyl]oxymethyl]oxan-2-yl]oxy-4a,5,6,7a-tetrahydro-1H-cyclopenta[c]pyran-4-carboxylic acid	[M+NH4]+	C27H34O15	Iridoid O-glycosides	DHHMFNAGLVIOCZ-LVPKXVBFSA-N	O=C(O)C1=COC(OC2OC(COC(=O)C=CC3=CC(OC)=C(O)C(OC)=C3)C(O)C(O)C2O)C4C1C(O)CC4(O)C	0.15406	0.00034038	1.8936
109	Positive	10.958	468.443	Unknown	[M+H]+	null	null	null	null	0.29947	0.00034038	1.43102
110	Positive	18.578	782.637	Unknown	[M+H]+	null	null	null	null	0.21676	0.00035634	1.9029
111	Negative	6.723	644.122	Unknown	[M-H]-	null	null	null	null	0.066047	0.00036745	1.63093
112	Negative	6.722	651.172	Unknown	[M-H]-	null	null	null	null	0.079603	0.00038136	1.71793
113	Positive	10.623	746.511	Unknown	[M+H]+	null	null	null	null	5.1188	0.0003998	1.71441
114	Positive	12.221	396.345	low score: N-Oleyl-Leucine	[M+H]+	C24H45NO3	Leucine and derivatives	UMOAAMQGRRCHPA-GJCOWUBNSA-N	CCCCCCCC/C=C\CCCCCCCC(=O)N[C@@H](CC(C)C)C(=O)O	0.23422	0.0004028	1.65053
115	Positive	11.947	828.597	Unknown	[M+H]+	null	null	null	null	3.8725	0.00040669	1.53433
116	Negative	7.042	651.175	Unknown	[M-H]-	null	null	null	null	0.088541	0.00041847	1.68787
117	Positive	10.311	365.169	low score: 7,8-Dihydroxy calonectrin	[M+Na]+	C19H26O8	Trichothecenes	JSKXQQKSUOVSKS-UHFFFAOYSA-N	CC1=CC2C(C(C1O)O)(C3(CC(C(C34CO4)O2)OC(=O)C)C)COC(=O)C	0.28498	0.00042286	2.02476
118	Negative	7.043	640.121	Unknown	[M-H]-	null	null	null	null	0.073724	0.00043368	1.70216
119	Negative	6.755	588.19	Unknown	[M-H]-	null	null	null	null	0.060421	0.00043564	1.62954
120	Positive	10.643	360.271	low score: Unknown (carbon number 19); PlaSMA ID-2018	[M+H]+	C19H37NO5	Unknown	null	null	0.29311	0.00043774	1.63865
121	Positive	10.767	325.258	Unknown	[M+H]+	null	null	null	null	0.376	0.00044477	1.99112
122	Positive	8.465	302.174	no MS2: octyltyrazolone	[M+H]+	C18H23NO3	Alpha amino acids and derivatives	LETLVQJZVBVGKT-SSZFMOIBSA-N	OC1=CC=C(/C=C2N=C(CCCCCCCC)OC\2=O)C=C1	0.41828	0.00044872	1.73439
123	Negative	1.289	700.077	Unknown	[M-H]-	null	null	null	null	0.044266	0.00046026	1.60452
124	Negative	7.047	624.151	Unknown	[M-H]-	null	null	null	null	0.11305	0.00046501	1.67078
125	Positive	8.51	324.316	Unknown	[M+H]+	null	null	null	null	0.24419	0.00048949	1.53586
126	Positive	9.655	544.403	Unknown	[M+H]+	null	null	null	null	0.2778	0.00049047	1.95787
127	Positive	7.866	332.191	mahanimbine	[M+H]+	C23H25NO	Carbazoles	HTNVFUBCWIYPJN-QHCPKHFHSA-N	O1C=2C(C=CC1(C)CCC=C(C)C)=C3NC=4C=CC=CC4C3=CC2C	0.27827	0.00049834	1.94406
128	Positive	12.298	443.314	low score: Unknown (carbon number 20); PlaSMA ID-2430	[M+H]+	C20H38N6O5	Unknown	null	null	0.24939	0.00049834	1.82845
129	Positive	7.061	972.685	Unknown	[M+H]+	null	null	null	null	0.23496	0.00049834	2.03406
130	Negative	1.269	682.113	Unknown	[M-H]-	null	null	null	null	0.051011	0.00049834	1.61524
131	Negative	1.466	630.174	Unknown	[M-H]-	null	null	null	null	0.013191	0.0005	1.60186
132	Positive	8.709	500.338	low score: "((4R)-4-((3R,5S,7R,9S,10S,13R,14S,17R)-3,7-dihydroxy-10,13-dimethylhexadecahydro-1H-cyclopenta[a]phenanthren-17-yl)-2,2-dimethylpentanoyl)glycine"	[M+Na]+	C28H47NO5	Glycinated bile acids and derivatives	HQPHGZUTNNVZLH-BOWXQMHNSA-N	[H][C@@]12[C@@H](O)C[C@@H]3C[C@H](O)CC[C@]3(C)[C@H]1CC[C@@]4(C)[C@H]2CC[C@@H]4[C@@H](CC(C)(C)C(NCC(O)=O)=O)C	0.39606	0.00050486	1.7494
133	Positive	9.034	524.361	no MS2: Methionine conjugated chenodeoxycholic acid	[M+H]+	C29H49NO5S	Glycinated bile acids and derivatives	CDNGTOVFEUSMMG-AVINCHNBSA-N	C[C@H](CCC(N[C@@H](CCSC)C(O)=O)=O)[C@H]1CC[C@@]2([H])[C@]3([H])[C@H](O)C[C@]4([H])C[C@H](O)CC[C@]4(C)[C@H]3CC[C@@]21C	6.3048	0.00050886	1.74324
134	Positive	13.787	735.639	Unknown	[M+H]+	null	null	null	null	0.2468	0.00050886	1.54995
135	Negative	7.04	612.219	Unknown	[M-H]-	null	null	null	null	0.076888	0.00051118	1.61751
136	Positive	1.161	326.87	Unknown	[M+H]+	null	null	null	null	3.9176	0.00051409	1.72776
137	Negative	7.041	574.215	low score: Zafirlukast	[M-H]-	C31H33N3O6S	Benzenesulfonamides	YEEZWCHGZNKEEK-UHFFFAOYSA-N	O=S(=O)(N=C(O)C1=CC=C(C(OC)=C1)CC2=CN(C=3C=CC(N=C(O)OC4CCCC4)=CC32)C)C=5C=CC=CC5C	0.087382	0.00051409	1.71364
138	Negative	13.242	619.428	Unknown	[M-H]-	null	null	null	null	2.0631	0.00051409	1.51267
139	Negative	1.272	684.111	Unknown	[M-H]-	null	null	null	null	0.04643	0.00051409	1.82602
140	Negative	1.055	768.142	Unknown	[M-H]-	null	null	null	null	0.21659	0.00051409	1.20931
141	Positive	11.082	664.465	Unknown	[M+H]+	null	null	null	null	5.3891	0.00052319	1.3139
142	Negative	7.819	459.181	low score: (2R,3S,4S,5R,6R)-2-[[(2S,3R,4R)-3,4-dihydroxy-4-(hydroxymethyl)oxolan-2-yl]oxymethyl]-6-[4-(4-hydroxyphenyl)butan-2-yloxy]oxane-3,4,5-triol	[M-H]-	C21H32O11	Fatty acyl glycosides of mono- and disaccharides	QJVVGCSWIOLQDG-PROUKMOUSA-N	OC1=CC=C(C=C1)CCC(OC2OC(COC3OCC(O)(CO)C3O)C(O)C(O)C2O)C	2.2811	0.00052559	1.61523
143	Positive	14.909	830.643	Unknown	[M+H]+	null	null	null	null	0.25347	0.00052862	1.90939
144	Positive	16.705	802.61	Unknown	[M+H]+	null	null	null	null	0.21913	0.00053339	1.51355
145	Positive	12.085	377.3	low score: "(4R)-4-((3R,5S,9S,10S,13R,14S,17R)-3-hydroxy-10,13-dimethylhexadecahydro-1H-cyclopenta[a]phenanthren-17-yl)pentanoic acid"	[M+H]+	C24H40O3	Monohydroxy bile acids, alcohols and derivatives	SMEROWZSTRWXGI-NWFSOSCSSA-N	C[C@@]12[C@](CC[C@]3([H])[C@@H]2CC[C@@]4(C)[C@H]3CC[C@@H]4[C@@H](CCC(O)=O)C)([H])C[C@H](O)CC1	0.23119	0.00053985	1.8042
146	Positive	8.527	280.171	no MS2: Sibutramine	[M+H]+	C17H26ClN	Chlorobenzenes	UNAANXDKBXWMLN-UHFFFAOYSA-N	ClC1=CC=C(C=C1)C2(CCC2)C(N(C)C)CC(C)C	2.8864	0.00055323	1.40558
147	Positive	13.48	852.657	Unknown	[M+H]+	null	null	null	null	6.2629	0.00055323	1.37593
148	Negative	10.947	599.232	Unknown	[M-H]-	null	null	null	null	0.056332	0.00055323	1.53607
149	Positive	8.75	412.246	1-Decanoyl-2-hydroxy-sn-glycero-3-phosphocholine	[M]+	C18H39NO7P	1-acyl-sn-glycero-3-phosphocholines	SECPDKKEUKDCPG-QGZVFWFLSA-O	CCCCCCCCCC(=O)OCC(O)COP(O)(=O)OCC[N+1](C)(C)C	0.32496	0.00056584	1.94765
150	Positive	10.259	678.477	Unknown	[M+H]+	null	null	null	null	5.7759	0.00056584	1.76033
151	Positive	13.478	804.621	Unknown	[M+H]+	null	null	null	null	0.27345	0.00056584	1.82022
152	Positive	8.955	562.399	Unknown	[M+H]+	null	null	null	null	0.30276	0.00056657	1.63058
153	Positive	10.166	622.417	Unknown	[M+H]+	null	null	null	null	15.25	0.00058013	1.4456
154	Positive	11.968	420.348	Unknown	[M+H]+	null	null	null	null	0.275	0.00058057	1.57913
155	Negative	7.054	572.215	Unknown	[M-H]-	null	null	null	null	0.091603	0.00058122	1.70379
156	Negative	7.037	582.239	Unknown	[M-H]-	null	null	null	null	0.073339	0.0005957	1.47553
157	Negative	6.724	675.096	Unknown	[M-H]-	null	null	null	null	0.037046	0.0005957	1.54433
158	Positive	10.598	716.501	Unknown	[M+H]+	null	null	null	null	14.543	0.0005972	1.3638
159	Positive	12.375	337.304	Unknown	[M+H]+	null	null	null	null	0.21842	0.00059831	1.7716
160	Positive	8.753	520.438	no MS2: "2alpha-acetoxy-3beta,22alpha-stictandiol"	[M+NH4]+	C32H54O4	Sesquiterpenoids	QZWMMIGRNYLXMG-XDRJWLFLSA-N	CC1(C)C2CC[C@@]3(C)C(CCC4C3(CCC3[C@@H](O)C(C)(C)CCC43C)C)C2(C)CC(OC(=O)C)C1O	0.27607	0.00059831	1.43679
161	Positive	15.521	758.637	Unknown	[M+H]+	null	null	null	null	0.20587	0.00059831	1.73421
162	Positive	9.266	766.058	Unknown	[M+H]+	null	null	null	null	0.24104	0.00059902	1.928
163	Negative	7.041	626.148	Unknown	[M-H]-	null	null	null	null	0.10043	0.00059902	1.69617
164	Positive	11.384	608.433	Unknown	[M+H]+	null	null	null	null	8.8538	0.00060139	1.21916
165	Negative	1.126	344.116	no MS2: Omeprazole	[M-H]-	C17H19N3O3S	Sulfinylbenzimidazoles	SUBDBMMJDZJVOS-UHFFFAOYSA-N	COC1=CC=C2N=C(NC2=C1)S(=O)CC1=NC=C(C)C(OC)=C1C	0.40676	0.00060139	1.51047
166	Positive	1.144	304.978	Unknown	[M+H]+	null	null	null	null	2.5944	0.00060746	1.54084
167	Negative	1.276	686.106	Unknown	[M-H]-	null	null	null	null	0.046596	0.00060746	1.72384
168	Negative	1.421	570.199	Unknown	[M-H]-	null	null	null	null	0.023124	0.00061719	1.44748
169	Positive	11.207	478.368	low score: "((4R)-4-((3R,5S,7R,9S,10S,13R,14S,17R)-3,7-dihydroxy-10,13-dimethylhexadecahydro-1H-cyclopenta[a]phenanthren-17-yl)-2,2-dimethylpentanoyl)glycine"	[M+H]+	C28H47NO5	Glycinated bile acids and derivatives	HQPHGZUTNNVZLH-BOWXQMHNSA-N	[H][C@@]12[C@@H](O)C[C@@H]3C[C@H](O)CC[C@]3(C)[C@H]1CC[C@@]4(C)[C@H]2CC[C@@H]4[C@@H](CC(C)(C)C(NCC(O)=O)=O)C	0.14969	0.00062191	1.77086
170	Positive	11.748	650.451	Unknown	[M+H]+	null	null	null	null	7.5686	0.00062455	1.38832
171	Positive	6.549	205.087	no MS2: NCGC00380309-01_C12H14O4_(7R,8R)-7,8-Dihydroxy-3,5,7-trimethyl-7,8-dihydro-6H-isochromen-6-one	[M-H2O+H]+	C12H14O4	Azaphilones	JVUYBLROBHJEJN-NEPJUHHUSA-N	CC/1=C/C/2=C(C)/C(=O)[C@](C)(O)[C@H](O)C2=C\O1	3.2507	0.00063339	1.68255
172	Positive	18.973	537.404	low score: Lysine conjugated cholic acid	[M+H]+	C30H52N2O6	Glycinated bile acids and derivatives	FTOTVNJFGHCOCZ-UHFFFAOYSA-N	C[CH](CCC(NC(CCCCN)C(O)=O)=O)[CH]1CC[CH]2[C]3([H])[CH](O)C[C]4([H])C[CH](O)CC[C]4(C)[CH]3C[CH](O)[C]21C	0.28311	0.0006385	1.88051
173	Positive	0.283	457.312	no MS2: Nakijiquinone H	[M+H]+	C26H40N4O3	Prenylquinones	UOJQVKJSJVULOG-UHFFFAOYSA-N	CC1=CCCC2C1(C)CCC(C)C2(C)CC3=C(O)C(C=C(NCCCCNC(N)=N)C3=O)=O	0.28592	0.0006385	1.76403
174	Negative	8.845	599.23	Unknown	[M-H]-	null	null	null	null	0.0749	0.0006386	1.49734
175	Positive	12.375	377.301	low score: "(4R)-4-((3R,5S,9S,10S,13R,14S,17R)-3-hydroxy-10,13-dimethylhexadecahydro-1H-cyclopenta[a]phenanthren-17-yl)pentanoic acid"	[M+H]+	C24H40O3	Monohydroxy bile acids, alcohols and derivatives	SMEROWZSTRWXGI-NWFSOSCSSA-N	C[C@@]12[C@](CC[C@]3([H])[C@@H]2CC[C@@]4(C)[C@H]3CC[C@@H]4[C@@H](CCC(O)=O)C)([H])C[C@H](O)CC1	0.20491	0.00063932	1.92027
176	Positive	13.797	395.291	low score: Unknown (carbon number 27); PlaSMA ID-2165	[M+K]+	C27H38O2	Unknown	null	null	0.3191	0.00063932	1.73311
177	Positive	15.515	808.656	Unknown	[M+H]+	null	null	null	null	0.26049	0.00063932	1.98556
178	Negative	8.082	599.233	Unknown	[M-H]-	null	null	null	null	0.059941	0.00065276	1.64534
179	Negative	7.026	641.121	Unknown	[M-H]-	null	null	null	null	0.082594	0.00065276	1.66123
180	Negative	6.722	640.126	Unknown	[M-H]-	null	null	null	null	0.05866	0.00065953	1.60747
181	Positive	18.916	664.536	Unknown	[M+H]+	null	null	null	null	0.34627	0.00066174	1.76273
182	Positive	15.495	782.639	Unknown	[M+H]+	null	null	null	null	0.28371	0.00066174	1.96518
183	Positive	7.066	972.349	low score: (NAG)(NAM)-AemC	[M+H]+	C37H61N7O21S	Oligopeptides	JLDNMWCWVRSBND-UHFFFAOYSA-N	CC(=O)NC1C(OC2C(CO)OC(O)C(NC(C)=O)C2OC(C)C(=O)NC(C)C(=O)NC(CCC(=O)NC(CCCC(N)C(=O)O)C(=O)NC(CS)C(=O)O)C(=O)O)OC(CO)C(O)C1O	0.24593	0.00066553	1.88867
184	Negative	6.746	626.151	Unknown	[M-H]-	null	null	null	null	0.080353	0.00066553	1.70678
185	Negative	9.558	614.292	Unknown	[M-H]-	null	null	null	null	2.7093	0.0006713	1.50332
186	Positive	12.377	400.376	Unknown	[M+H]+	null	null	null	null	0.23045	0.00068533	1.84296
187	Positive	13.477	703.639	Unknown	[M+H]+	null	null	null	null	0.2611	0.00069174	1.75842
188	Positive	16.867	780.62	Unknown	[M+H]+	null	null	null	null	0.25889	0.00069174	1.81974
189	Positive	9.002	724.484	Unknown	[M+H]+	null	null	null	null	7.9816	0.0006938	1.33079
190	Positive	12.376	245.249	low score: N1-Acetylspermine	[M+H]+	C12H28N4O	Acetamides	GUNURVWAJRRUAV-UHFFFAOYSA-N	NCCCNCCCCNCCCNC(C)=O	0.24389	0.00070183	1.79646
191	Positive	12.813	369.386	Unknown	[M+H]+	null	null	null	null	0.26665	0.00072215	1.86699
192	Negative	6.739	574.209	low score: Zafirlukast	[M-H]-	C31H33N3O6S	Benzenesulfonamides	YEEZWCHGZNKEEK-UHFFFAOYSA-N	O=S(=O)(N=C(O)C1=CC=C(C(OC)=C1)CC2=CN(C=3C=CC(N=C(O)OC4CCCC4)=CC32)C)C=5C=CC=CC5C	0.067244	0.00072215	1.65247
193	Positive	14.532	780.621	Unknown	[M+H]+	null	null	null	null	0.39043	0.00072988	1.53338
194	Positive	10.311	343.188	low score: 9-phenyl-1-(2,4,6-trihydroxyphenyl)nonan-1-one	[M+H]+	C21H26O4	Alkyl-phenylketones	OOGZWXIAHJKVAH-UHFFFAOYSA-N	O=C(C=1C(O)=CC(O)=CC1O)CCCCCCCCC=2C=CC=CC2	0.35871	0.00073031	1.83425
195	Positive	1.466	614.196	no MS2: NCGC00169958-02![(2R,3R,4S,5R,6S)-3,5-dihydroxy-4-[(E)-3-(1-hydroxy-4-oxocyclohexa-2,5-dien-1-yl)prop-2-enoyl]oxy-6-(4-hydroxyphenoxy)oxan-2-yl]methyl (E)-3-(1-hydroxy-4-oxocyclohexa-2,5-dien-1-yl)prop-2-enoate [IIN-based: Match]	[M+NH4]+	C30H28O13	Saccharolipids	UJKUPLFZLUIDFV-QEVJKITNSA-N	O[C@@H]1[C@@H](COC(=O)\\C=C\\C2(O)C=CC(=O)C=C2)O[C@@H](OC3=CC=C(O)C=C3)[C@H](O)[C@H]1OC(=O)\\C=C\\C4(O)C=CC(=O)C=C4	7.8221	0.00075632	1.3243
196	Positive	14.396	471.352	low score: glycyrrhetic acid	[M+H]+	C30H46O4	Triterpenoids	MPDGHEJMBKOTSU-YKLVYJNSSA-N	O=C(O)C1(C)CCC2(C)CCC3(C(=CC(=O)C4C5(C)CCC(O)C(C)(C)C5CCC43C)C2C1)C	0.26332	0.00075655	1.74855
197	Negative	6.565	295.59	Unknown	[M-H]-	null	null	null	null	0.47376	0.00076556	1.43157
198	Positive	0.261	832.658	Unknown	[M+H]+	null	null	null	null	0.26296	0.00077095	1.80914
199	Negative	6.724	642.129	Unknown	[M-H]-	null	null	null	null	0.058079	0.00077095	1.6565
200	Positive	8.772	802.058	low score: (NAG)(NAM)-AqOA[3-NH2-SATA];(G-G)-(NAG)(NAM)-AqOA[3-NH2-SATA]	[M+3H]3+	C96H162N24O47	Polypeptides	QMVZTJWZCDWESW-UHFFFAOYSA-N	CC(=O)NC1C(OC2C(CO)OC(OC3C(CO)OC(OC4C(CO)OC(O)C(NC(C)=O)C4OC(C)C(=O)NC(C)C(=O)NC(CCC(=O)NC(CCCNC(=O)C(CO)NC(=O)C(C)NC(=O)C(NC(=O)C(C)N)C(C)O)C(=O)NC(C)C(=O)O)C(N)=O)C(NC(C)=O)C3O)C(NC(C)=O)C2OC(C)C(=O)NC(C)C(=O)NC(CCC(=O)NC(CCCNC(=O)C(CO)NC(=O)C(C)NC(=O)C(NC(=O)C(C)N)C(C)O)C(=O)NC(C)C(=O)O)C(N)=O)OC(CO)C(O)C1O	0.24494	0.000772	1.75626
201	Negative	1.185	648.137	Unknown	[M-H]-	null	null	null	null	0.036565	0.00077446	1.4603
202	Positive	19.609	807.644	Unknown	[M+H]+	null	null	null	null	0.25046	0.00077799	1.9436
203	Positive	9.895	332.328	Unknown	[M+H]+	null	null	null	null	0.29618	0.00078943	1.80946
204	Positive	10.138	594.418	low score: NCGC00381159-01!2-[[3,21-dihydroxy-20-[3,4,5-trihydroxy-6-(hydroxymethyl)oxan-2-yl]oxydocosan-2-yl]amino]acetic acid	[M+H]+	C30H59NO10	Fatty acyl glycosides of mono- and disaccharides	BFJZLVDYMQIIMI-UHFFFAOYSA-N	CC(O)C(CCCCCCCCCCCCCCCCC(O)C(C)NCC(O)=O)OC1OC(CO)C(O)C(O)C1O	7.2313	0.00078943	1.29863
205	Negative	1.28	608.18	Unknown	[M-H]-	null	null	null	null	0.034953	0.00078943	1.64666
206	Negative	12.523	516.264	Unknown	[M-H]-	null	null	null	null	0.07329	0.00079897	1.37764
207	Negative	6.745	572.219	Unknown	[M-H]-	null	null	null	null	0.066571	0.00079897	1.60864
208	Positive	12.376	263.261	Unknown	[M+H]+	null	null	null	null	0.24159	0.00081789	1.80749
209	Positive	0.172	632.474	Unknown	[M+H]+	null	null	null	null	0.034849	0.00082351	1.54632
210	Positive	9.24	527.37	low score: Dehydropachymic acid	[M+H]+	C33H50O5	Triterpenoids	RWIALJIVPUCERT-DRCQUEPLSA-N	O=C(OC1CCC2(C3=CCC4(C)C(C(O)CC4(C3=CCC2C1(C)C)C)C(C(=O)O)CCC(=C)C(C)C)C)C	0.37487	0.00082351	1.76786
211	Positive	8.772	205.086	low score: Angelic anhydride	[M+Na]+	C10H14O3	Dicarboxylic acids and derivatives	LIHLSLRANKCHLV-SFECMWDFSA-N	O=C(OC(=O)C(=CC)C)C(=CC)C	2.9529	0.00082351	1.45487
212	Positive	8.584	564.31	no MS2: Fosinopril	[M+H]+	C30H46NO7P	Proline and derivatives	BIDNLKIUORFRQP-FKDWWROVSA-N	O=C(CP(=O)(CCCCc1ccccc1)OC(OC(=O)CC)C(C)C)N2C[C@@H](C[C@H]2C(O)=O)C3CCCCC3	0.30838	0.00082351	1.65648
213	Negative	9.201	572.215	Unknown	[M-H]-	null	null	null	null	0.066114	0.00082351	1.43815
214	Positive	8.49	528.33	no MS2: "2-((4R)-4-((3R,5S,7S,9S,10S,13R,14S,17R)-3,7-dihydroxy-10,13-dimethylhexadecahydro-1H-cyclopenta[a]phenanthren-17-yl)-2,2-dimethylpentanamido)ethane-1-sulfonic acid"	[M+H]+	C28H49NO6S	Taurinated bile acids and derivatives	UXAHTIGXQXJADE-VHDFTFQCSA-N	[H][C@@]12[C@@H](O)C[C@]3([H])C[C@H](O)CC[C@]3(C)[C@H]1CC[C@@]4(C)[C@H]2CC[C@@H]4[C@@H](CCC(NCC(C)(C)S(=O)(O)=O)=O)C	5.1394	0.00082603	1.57555
215	Positive	8.69	606.348	low score: NCGC00386085-01_C32H44O10_	[M+NH4]+	C32H44O10	Oxepanes	MPCIDUFOTGXABA-UHFFFAOYSA-N	CC1OC\23C/4=C(/C(O)C5C(C)(CCC6OC(CC(OC(C)=O)C56C)C(C)(C)O)O4)C(=O)\C=C2C(C)C(OC(C)=O)C13C	0.27884	0.00083491	1.90906
216	Positive	1.219	441.103	no MS2: Aloin A	[M+Na]+	C21H22O9	Anthracenes	AFHJQYHRLPMKHU-OSYMLPPYSA-N	O=C1C=2C(O)=CC=CC2C(C3=CC(=CC(O)=C13)CO)C4OC(CO)C(O)C(O)C4O	5.2698	0.00083792	1.35632
217	Negative	10.281	614.18	Unknown	[M-H]-	null	null	null	null	0.099996	0.00083792	1.35865
218	Negative	6.736	612.22	Unknown	[M-H]-	null	null	null	null	0.058316	0.00084119	1.60714
219	Positive	14.91	782.639	Unknown	[M+H]+	null	null	null	null	0.30572	0.00084535	1.9007
220	Negative	8.212	573.218	no MS2: 5(S)-5-carboxystrictosidine; PlaSMA ID-1571	[M-H]-	C28H34N2O11	Terpene glycosides	LHKZIVMTXZLOTP-UHFFFAOYNA-N	COC(=O)C1=COC(OC2OC(CO)C(O)C(O)C2O)C(C=C)C1CC1NC(CC2=C1NC1=C2C=CC=C1)C(O)=O	0.066436	0.00085616	1.4739
221	Positive	12.898	357.3	MAG	[M+H]+	C21H40O4	1-monoacylglycerols	RZRNAYUHWVFMIP-KTKRTIGZSA-N	CCCCCCCC/C=C\CCCCCCCC(=O)OCC(CO)O	2.4656	0.00086072	1.68567
222	Positive	9.785	676.465	Unknown	[M+H]+	null	null	null	null	34.056	0.00086072	1.473
223	Positive	7.101	970.568	Unknown	[M+H]+	null	null	null	null	0.27364	0.00086072	1.89215
224	Negative	1.365	588.191	Unknown	[M-H]-	null	null	null	null	0.024073	0.00086072	1.55681
225	Negative	1.167	923.94	Unknown	[M-H]-	null	null	null	null	0.079495	0.00086717	1.57332
226	Negative	12.336	607.443	Unknown	[M-H]-	null	null	null	null	4.027	0.00086964	1.54766
227	Positive	1.202	393.257	no MS2: NCGC00380670-01_C19H36O8_[5-Hydroxy-2-(3-hydroxybutyl)-3,3-dimethylcyclohexyl]methyl beta-D-glucopyranoside	[M+H]+	C19H36O8	Terpene glycosides	GQUCOZSVXCLPKQ-SQNVVSGMSA-N	CC(O)CCC1C(CO[C@@H]2O[C@H](CO)[C@@H](O)[C@H](O)[C@H]2O)CC(O)CC1(C)C	0.48145	0.00088479	1.14537
228	Negative	1.231	752.272	Unknown	[M-H]-	null	null	null	null	0.015753	0.00088479	1.50033
229	Negative	10.292	574.22	Unknown	[M-H]-	null	null	null	null	0.083804	0.00089649	1.40266
230	Positive	10.617	205.085	low score: 1-(4-methoxyphenyl)propane-1,2-diol	[M+Na]+	C10H14O3	Phenylpropanes	MRDZSBVJWOXBRW-UHFFFAOYSA-N	OC(C1=CC=C(OC)C=C1)C(O)C	3.4746	0.00089866	1.6438
231	Negative	1.175	708.093	Unknown	[M-H]-	null	null	null	null	0.14013	0.00090088	1.3921
232	Positive	7.104	970.459	Unknown	[M+H]+	null	null	null	null	0.28039	0.00090602	1.89714
233	Positive	1.186	477.784	Unknown	[M+H]+	null	null	null	null	5.9504	0.0009094	1.65869
234	Positive	0.961	896.797	Unknown	[M+H]+	null	null	null	null	6.3058	0.00091528	1.46284
235	Positive	18.755	758.639	Unknown	[M+H]+	null	null	null	null	0.25906	0.00092046	1.96269
236	Positive	8.787	814.062	Unknown	[M+H]+	null	null	null	null	0.26447	0.00092046	1.85958
237	Negative	12.527	498.263	low score: Phosphatidylethanolamine lyso 20:5	[M-H]-	C25H42NO7P	2-acyl-sn-glycero-3-phosphoethanolamines	UNILCTDPRMGSDM-JEBPEJKESA-N	CCCC=CCC=CCC=CCC=CCC=CCCC(=O)OC(CO)COP(O)(=O)OCCN	0.091572	0.00092046	1.59042
238	Negative	1.279	698.085	Unknown	[M-H]-	null	null	null	null	0.0514	0.00092046	1.64709
239	Negative	6.711	653.169	low score: 6-hydroxy-3-[3-hydroxy-4-[3,4,5-trihydroxy-6-[[3,4,5-trihydroxy-6-(hydroxymethyl)oxan-2-yl]oxymethyl]oxan-2-yl]oxyphenyl]-5,7-dimethoxychromen-4-one	[M-H]-	C29H34O17	Isoflavonoid O-glycosides	KHCREUNEQGORAM-UHFFFAOYSA-N	O=C1C(=COC2=CC(OC)=C(O)C(OC)=C12)C=3C=CC(OC4OC(COC5OC(CO)C(O)C(O)C5O)C(O)C(O)C4O)=C(O)C3	0.06964	0.00092383	1.52443
240	Positive	19.515	806.64	Unknown	[M+H]+	null	null	null	null	0.25318	0.00092905	1.9674
241	Negative	13.448	514.258	Unknown	[M-H]-	null	null	null	null	0.062407	0.00092905	1.49539
242	Negative	7.016	639.115	Unknown	[M-H]-	null	null	null	null	0.093106	0.00092905	1.58308
243	Negative	7.016	675.095	Unknown	[M-H]-	null	null	null	null	0.084842	0.00092905	1.5647
244	Positive	1.331	297.094	low score: OCP_297.1002_16.5	[M+H]+	C14H17ClN2O3	Phenylpiperazines	FMKKWAHJJLLAOW-UHFFFAOYSA-N	OC(=O)CCC(=O)N1CCN(CC1)c1ccccc1Cl	7.0919	0.00093451	1.88264
245	Positive	19.329	806.642	Unknown	[M+H]+	null	null	null	null	0.25642	0.00093511	1.93429
246	Negative	10.264	572.21	Unknown	[M-H]-	null	null	null	null	0.0718	0.00093511	1.46835
247	Negative	6.734	624.155	Unknown	[M-H]-	null	null	null	null	0.087	0.00093979	1.70297
248	Negative	13.763	514.259	Unknown	[M-H]-	null	null	null	null	0.064478	0.00093985	1.43599
249	Positive	12.376	355.316	Unknown	[M+H]+	null	null	null	null	0.26258	0.00094204	1.68116
250	Negative	13.466	515.26	no MS2: 1,6-dihydroxy-8-(hydroxymethyl)-4,12,12,15-tetramethyl-13-[(2-methylpropanoyl)oxy]-5-oxotetracyclo[8.5.0.0?,?.0??,??]pentadeca-3,8-dien-14-yl (2E)-2-methylbut-2-enoate	[M-H]-	C29H40O8	Phorbol esters	MVWXLRYZCZSBKW-OQLLNIDSSA-N	O=C(OC1C(C)C2(O)C(C=C(CO)CC3(O)C(=O)C(=CC32)C)C4C1(OC(=O)C(C)C)C4(C)C)C(=CC)C	0.0696	0.00094962	1.43995
251	Negative	14.272	514.259	Unknown	[M-H]-	null	null	null	null	0.068486	0.00095385	1.45848
252	Positive	16.448	758.637	Unknown	[M+H]+	null	null	null	null	0.22106	0.00095858	1.91452
253	Positive	0.067	780.626	Unknown	[M+H]+	null	null	null	null	0.31024	0.00096873	1.6126
254	Negative	8.783	513.244	no MS2: Lucidenic acid D	[M-H]-	C29H38O8	Triterpenoids	LTJSBYAKDOGXLX-JTJCPSTFSA-N	O=C(OC1C(=O)C2=C(C(=O)CC3C(C(=O)CCC23C)(C)C)C4(C(=O)CC(C(C)CCC(=O)O)C14C)C)C	0.061025	0.00097816	1.38655
255	Negative	8.85	614.181	Unknown	[M-H]-	null	null	null	null	0.090723	0.00099451	1.41021
256	Positive	12.376	372.344	low score: NCGC00380102-01!3-hexadecyl-4-methoxy-5-methyloxolan-2-one	[M+NH4]+	C22H42O3	Gamma butyrolactones	DJNFXUFERDZHCD-UHFFFAOYSA-N	CCCCCCCCCCCCCCCCC1C(OC)C(C)OC1=O	0.25032	0.00099651	1.77539
257	Negative	10.845	498.263	no MS2: Phosphatidylethanolamine lyso 20:5	[M-H]-	C25H42NO7P	2-acyl-sn-glycero-3-phosphoethanolamines	UNILCTDPRMGSDM-JEBPEJKESA-N	CCCC=CCC=CCC=CCC=CCC=CCCC(=O)OC(CO)COP(O)(=O)OCCN	0.085115	0.00099651	1.49714
258	Positive	6.286	520.331	low score: LPC 18:2	[M+H]+	C26H50NO7P	1-acyl-sn-glycero-3-phosphocholines	SPJFYYJXNPEZDW-UHFFFAOYSA-N	O=C(OCC(O)COP(=O)([O-])OCC[N+](C)(C)C)CCCCCCCC=CCC=CCCCCC	2.2252	0.00099847	1.09063
259	Positive	1.182	280.092	low score: haplamine	[M+Na]+	C15H15NO3	Pyranoquinolines	IXRKDGGGFFCRIR-UHFFFAOYSA-N	O=C1NC=2C=CC(OC)=CC2C=3OC(C=CC13)(C)C	3.2671	0.0010013	1.1866
260	Negative	10.924	614.18	Unknown	[M-H]-	null	null	null	null	0.061131	0.0010034	1.46147
261	Negative	8.07	573.219	low score: 5(S)-5-carboxystrictosidine	[M-H]-	C28H34N2O11	Terpene glycosides	LHKZIVMTXZLOTP-UHFFFAOYNA-N	COC(=O)C1=COC(OC2OC(CO)C(O)C(O)C2O)C(C=C)C1CC1NC(CC2=C1NC1=CC=CC=C21)C(O)=O	0.07301	0.0010073	1.55252
262	Negative	10.958	573.219	low score: 5(S)-5-carboxystrictosidine	[M-H]-	C28H34N2O11	Terpene glycosides	LHKZIVMTXZLOTP-UHFFFAOYNA-N	COC(=O)C1=COC(OC2OC(CO)C(O)C(O)C2O)C(C=C)C1CC1NC(CC2=C1NC1=CC=CC=C21)C(O)=O	0.068646	0.0010074	1.48013
263	Negative	6.881	610.207	Unknown	[M-H]-	null	null	null	null	0.057022	0.0010093	1.66817
264	Negative	7.258	572.216	Unknown	[M-H]-	null	null	null	null	0.062043	0.0010107	1.52324
265	Positive	7.067	972.569	Unknown	[M+H]+	null	null	null	null	0.268	0.0010217	1.82694
266	Positive	9.203	706.448	low score: Solanidine base + O-Hex-dHex	[M+H]+	C39H63NO10	Steroidal saponins	ZLSYCIYRYZUJCZ-UHFFFAOYSA-N	OCC8OC(OC6CC5=CCC4C(CCC3(C)(C4(CC2N1CC(C)CCC1C(C)C23)))C5(C)CC6)C(OC7OC(C)C(O)C(O)C7(O))C(O)C8(O)	5.8644	0.0010269	1.62654
267	Positive	8.463	504.327	low score: glutamate conjugated chenodeoxycholic acid	[M-H2O+H]+	C29H47NO7	Glycinated bile acids and derivatives	MHOZNCAVRHAOKT-PYDJSGOHSA-N	O=C(O)CCC(N=C(O)CCC(C)C1CCC2C3C(O)CC4CC(O)CCC4(C)C3CCC12C)C(=O)O	10.938	0.0010309	1.14667
268	Positive	17.723	429.277	Unknown	[M+H]+	null	null	null	null	0.33275	0.0010309	1.89525
269	Negative	9.841	498.264	no MS2: Phosphatidylethanolamine lyso 20:5	[M-H]-	C25H42NO7P	2-acyl-sn-glycero-3-phosphoethanolamines	UNILCTDPRMGSDM-JEBPEJKESA-N	CCCC=CCC=CCC=CCC=CCC=CCCC(=O)OC(CO)COP(O)(=O)OCCN	0.087756	0.0010309	1.53656
270	Negative	12.479	514.258	Unknown	[M-H]-	null	null	null	null	0.05703	0.0010309	1.46699
271	Negative	8.164	572.215	Unknown	[M-H]-	null	null	null	null	0.064367	0.0010309	1.45181
272	Negative	1.33	594.211	Unknown	[M-H]-	null	null	null	null	0.47456	0.0010309	1.35991
273	Negative	6.729	634.182	Unknown	[M-H]-	null	null	null	null	0.085171	0.0010309	1.49267
274	Negative	1.511	641.122	Unknown	[M-H]-	null	null	null	null	0.017093	0.0010309	1.4423
275	Positive	16.041	758.636	Unknown	[M+H]+	null	null	null	null	0.21608	0.0010396	1.84536
276	Negative	6.76	500.244	Unknown	[M-H]-	null	null	null	null	0.063822	0.0010396	1.55419
277	Positive	19.623	806.64	Unknown	[M+H]+	null	null	null	null	0.26379	0.0010441	1.95847
278	Negative	1.254	702.08	Unknown	[M-H]-	null	null	null	null	0.049905	0.0010443	1.54455
279	Positive	6.954	228.217	Unknown	[M+H]+	null	null	null	null	0.31725	0.0010613	1.89072
280	Positive	1.041	734.857	Unknown	[M+H]+	null	null	null	null	5.4606	0.0010613	1.39993
281	Positive	0.816	281.052	low score: 3-[(E)-2-(3-hydroxyphenyl)ethenyl]-5-methoxyphenol	[M+K]+	C15H14O3	Stilbenes	VANIIUGEHGLNHB-AATRIKPKSA-N	OC1=CC=CC(C=CC=2C=C(O)C=C(OC)C2)=C1	3.3307	0.0010613	1.67179
282	Positive	13.351	421.289	low score: (1S,4S,5R,9S,10R,13R,14R)-14-hydroxy-5,9-dimethyl-14-{[(3-methylbutanoyl)oxy]methyl}tetracyclo[11.2.1.0?,??.0?,?]hexadecane-5-carboxylic acid	[M+H]+	C25H40O5	Kaurane diterpenoids	FIOZUJXSEZUYCS-MTSAZYMTSA-N	O=C(OCC1(O)CC23CCC4C(C(=O)O)(C)CCCC4(C)C3CCC1C2)CC(C)C	0.3199	0.0010613	1.79728
283	Positive	19.259	807.64	Unknown	[M+H]+	null	null	null	null	0.25275	0.0010613	1.83282
284	Positive	7.099	970.678	Unknown	[M+H]+	null	null	null	null	0.27979	0.0010613	1.92457
285	Negative	1.049	892.08	Unknown	[M-H]-	null	null	null	null	0.31724	0.0010613	1.1748
286	Negative	7.042	514.323	Unknown	[M-H]-	null	null	null	null	0.052108	0.0010684	1.47492
287	Positive	7.064	875.316	low score: NCGC00385098-01![8,8-dimethyl-9-(3-methylbut-2-enoyloxy)-2-oxo-9,10-dihydropyrano[2,3-f]chromen-10-yl] 3-methylbut-2-enoate [IIN-based on: CCMSLIB00000846416]	[2M+Na]+	C24H26O7	Angular pyranocoumarins	UHWIZIJICYWABA-UHFFFAOYSA-N	CC(C)=CC(=O)OC1C(OC(=O)C=C(C)C)C(C)(C)OC2=CC=C3C=CC(=O)OC3=C12	0.2608	0.0010729	1.90949
288	Negative	10.873	516.254	Unknown	[M-H]-	null	null	null	null	0.069243	0.0010775	1.39689
289	Positive	16.058	708.627	Unknown	[M+H]+	null	null	null	null	0.29741	0.0010825	1.92773
290	Positive	10.243	598.44	Unknown	[M+H]+	null	null	null	null	0.31005	0.0010825	1.6952
291	Positive	12.636	774.616	Unknown	[M+H]+	null	null	null	null	7.6604	0.0010872	1.34953
292	Positive	9.303	586.358	Unknown	[M+H]+	null	null	null	null	0.31726	0.0010891	1.79757
293	Positive	1.541	615.202	Unknown	[M+H]+	null	null	null	null	7.1372	0.0010891	1.10626
294	Positive	9.954	580.401	low score: NCGC00385384-01![(6R)-6-hydroxy-2-methyl-5-oxo-6-[(2S,3S,9R,13R,14S,16R)-2,3,16-trihydroxy-4,4,9,13,14-pentamethyl-11-oxo-1,2,3,7,8,10,12,15,16,17-decahydrocyclopenta[a]phenanthren-17-yl]heptan-2-yl] acetate	[M+NH4]+	C32H50O8	Cucurbitacins	LKYNAQSYQLFTCM-KGCOOEROSA-N	CC(=O)OC(C)(C)CCC(=O)[C@](C)(O)C1[C@H](O)C[C@@]2(C)C3CC=C4C(C[C@H](O)[C@@H](O)C4(C)C)[C@]3(C)C(=O)C[C@]12C	10.357	0.0010891	1.20882
295	Positive	18.891	759.642	Unknown	[M+H]+	null	null	null	null	0.27806	0.0010891	1.90765
296	Negative	1.094	760.104	no MS2: PFSM-ammonio; [C19H28F15N2O8S2]+	[M-H]-	C19H28F15N2O8S2	Organosulfonic acids and derivatives	IAOBAYYCZWPCRG-UHFFFAOYSA-O	O=S(=O)(O)CCCN(C(CO)CC[N+](C)(C)CC(O)CO)S(=O)(=O)C(F)(F)C(F)(F)C(F)(F)C(F)(F)C(F)(F)C(F)(F)C(F)(F)F	0.29944	0.0010891	1.251
297	Negative	10.836	572.216	Unknown	[M-H]-	null	null	null	null	0.068935	0.0010921	1.4071
298	Negative	10.275	516.263	Unknown	[M-H]-	null	null	null	null	0.065606	0.0011015	1.46935
299	Negative	10.59	515.263	low score: 1,6-dihydroxy-8-(hydroxymethyl)-4,12,12,15-tetramethyl-13-[(2-methylpropanoyl)oxy]-5-oxotetracyclo[8.5.0.0?,?.0??,??]pentadeca-3,8-dien-14-yl (2E)-2-methylbut-2-enoate	[M-H]-	C29H40O8	Phorbol esters	MVWXLRYZCZSBKW-OQLLNIDSSA-N	O=C(OC1C(C)C2(O)C(C=C(CO)CC3(O)C(=O)C(=CC32)C)C4C1(OC(=O)C(C)C)C4(C)C)C(=CC)C	0.058391	0.0011092	1.44617
300	Negative	0.352	599.23	Unknown	[M-H]-	null	null	null	null	0.086357	0.0011092	1.34197
301	Negative	1.293	624.154	Unknown	[M-H]-	null	null	null	null	0.036508	0.0011092	1.65317
302	Positive	9.117	708.457	low score: MLS002222329-01!26305-03-3	[M+Na]+	C34H63N5O9	Hybrid peptides	FAXGPCHRFPCXOO-LXTPJMTPSA-N	CC(C)C[C@H](NC(=O)[C@H](C)NC(=O)C[C@H](O)[C@H](CC(C)C)NC(=O)[C@@H](NC(=O)[C@@H](NC(=O)CC(C)C)C(C)C)C(C)C)[C@@H](O)CC(=O)O	13.483	0.0011108	1.11772
303	Negative	1.198	719.202	Unknown	[M-H]-	null	null	null	null	0.029465	0.0011108	1.54373
304	Negative	9.554	624.319	Unknown	[M-H]-	null	null	null	null	2.3688	0.0011165	1.64723
305	Negative	6.727	512.641	Unknown	[M-H]-	null	null	null	null	0.047449	0.0011182	1.41407
306	Positive	9.249	636.384	Unknown	[M+H]+	null	null	null	null	0.20436	0.0011253	1.44009
307	Negative	12.531	512.245	Unknown	[M-H]-	null	null	null	null	0.049819	0.0011253	1.45979
308	Negative	6.733	512.658	Unknown	[M-H]-	null	null	null	null	0.048169	0.0011253	1.50052
309	Positive	11.902	688.505	low score: DG(20:5/0:0/20:5) (d5)	[M+Na]+	C43H59[2H]5O5	Other hydroxyeicosapolyenoic acids	TXYVJIXIUGRAFF-VSBNSUKNSA-N	[2H]C(OC(=O)CCC/C=C\C/C=C\C/C=C\C/C=C\C/C=C\CC)(C(O)(C(OC(=O)CCC/C=C\C/C=C\C/C=C\C/C=C\C/C=C\CC)([2H])[2H])[2H])[2H]	3.4136	0.0011313	1.21569
310	Positive	10.431	620.431	Unknown	[M+H]+	null	null	null	null	6.4963	0.0011313	1.18574
311	Positive	0.293	807.645	Unknown	[M+H]+	null	null	null	null	0.29695	0.0011313	1.93543
312	Negative	8.035	572.213	Unknown	[M-H]-	null	null	null	null	0.06768	0.0011313	1.48917
313	Negative	8.033	574.208	no MS2: Zafirlukast	[M-H]-	C31H33N3O6S	Benzenesulfonamides	YEEZWCHGZNKEEK-UHFFFAOYSA-N	O=S(=O)(N=C(O)C1=CC=C(C(OC)=C1)CC2=CN(C=3C=CC(N=C(O)OC4CCCC4)=CC32)C)C=5C=CC=CC5C	0.073975	0.0011313	1.41425
314	Negative	8.187	599.228	Unknown	[M-H]-	null	null	null	null	0.085056	0.0011313	1.49755
315	Positive	9.929	752.585	Unknown	[M+H]+	null	null	null	null	0.26168	0.0011357	1.58942
316	Positive	9.531	622.416	Unknown	[M+H]+	null	null	null	null	18.074	0.0011422	1.38802
317	Positive	16.144	758.635	Unknown	[M+H]+	null	null	null	null	0.22073	0.0011422	1.78091
318	Positive	19.452	807.642	Unknown	[M+H]+	null	null	null	null	0.27278	0.0011422	1.89021
319	Negative	12.053	514.258	Unknown	[M-H]-	null	null	null	null	0.057997	0.0011422	1.44568
320	Negative	0.437	642.125	Unknown	[M-H]-	null	null	null	null	0.097481	0.0011422	1.67862
321	Positive	8.181	512.376	Unknown	[M+H]+	null	null	null	null	0.34351	0.0011484	1.58454
322	Negative	7.046	515.321	Unknown	[M-H]-	null	null	null	null	0.055125	0.0011484	1.46491
323	Negative	1.318	592.201	Unknown	[M-H]-	null	null	null	null	0.19351	0.0011493	1.3122
324	Negative	10.734	515.263	low score: 1,6-dihydroxy-8-(hydroxymethyl)-4,12,12,15-tetramethyl-13-[(2-methylpropanoyl)oxy]-5-oxotetracyclo[8.5.0.0?,?.0??,??]pentadeca-3,8-dien-14-yl (2E)-2-methylbut-2-enoate	[M-H]-	C29H40O8	Phorbol esters	MVWXLRYZCZSBKW-OQLLNIDSSA-N	O=C(OC1C(C)C2(O)C(C=C(CO)CC3(O)C(=O)C(=CC32)C)C4C1(OC(=O)C(C)C)C4(C)C)C(=CC)C	0.058083	0.0011505	1.46302
325	Positive	6.116	327.204	low score: Acitretin	[M+H-2H2O]+	C21H26O3	Retinoids	IHUNBGSDBOWDMA-UGOGCBOOSA-N	O=C(O)C=C(C=CC=C(C=CC=1C(=CC(OC)=C(C1C)C)C)C)C	3.0772	0.0011541	1.30342
326	Positive	10.047	620.494	Unknown	[M+H]+	null	null	null	null	0.29255	0.0011541	1.58224
327	Negative	6.712	515.324	Unknown	[M-H]-	null	null	null	null	0.036895	0.0011541	1.3674
328	Negative	6.87	624.154	Unknown	[M-H]-	null	null	null	null	0.049728	0.0011744	1.47962
329	Positive	7.809	603.35	low score: Canthaxanthin (Euglenanone)	[M+K]+	C40H52O2	Xanthophylls	FDSDTBUPSURDBL-DKLMTRRASA-N	O=C1C(=C(C=CC(=CC=CC(=CC=CC=C(C=CC=C(C=CC2=C(C(=O)CCC2(C)C)C)C)C)C)C)C(C)(C)CC1)C	0.30191	0.0011746	1.84683
330	Positive	1.199	612.249	Unknown	[M+H]+	null	null	null	null	0.32556	0.0011746	1.48952
331	Positive	14.533	804.623	Unknown	[M+H]+	null	null	null	null	0.3117	0.0011746	1.72957
332	Positive	7.065	972.234	Unknown	[M+H]+	null	null	null	null	0.26953	0.0011746	1.92809
333	Negative	9.853	515.263	no MS2: 1,6-dihydroxy-8-(hydroxymethyl)-4,12,12,15-tetramethyl-13-[(2-methylpropanoyl)oxy]-5-oxotetracyclo[8.5.0.0?,?.0??,??]pentadeca-3,8-dien-14-yl (2E)-2-methylbut-2-enoate	[M-H]-	C29H40O8	Phorbol esters	MVWXLRYZCZSBKW-OQLLNIDSSA-N	O=C(OC1C(C)C2(O)C(C=C(CO)CC3(O)C(=O)C(=CC32)C)C4C1(OC(=O)C(C)C)C4(C)C)C(=CC)C	0.057268	0.0011746	1.46939
334	Negative	9.515	572.213	Unknown	[M-H]-	null	null	null	null	0.06212	0.0011746	1.42641
335	Negative	1.128	744.172	Unknown	[M-H]-	null	null	null	null	0.22848	0.0011746	1.11293
336	Positive	8.772	558.344	low score: Dimethyl ketal of oxysporidinone_130004	[M+Na]+	C30H49NO7	Terpene glycosides	OKLOELQSMKXXGE-RCCKNPSSSA-N	OC1CC(OC)(OC)CCC1(O)C2=CN(C)C(C(C3OC(/C(C)=C/C(C)CC(C)CC)C(C)CC3)=C2O)=O	0.33352	0.0011794	1.85752
337	Positive	9.952	352.354	Unknown	[M+H]+	null	null	null	null	0.27732	0.0011794	1.78736
338	Positive	0.176	609.392	Unknown	[M+H]+	null	null	null	null	0.046684	0.0011794	1.42223
339	Positive	7.066	875.411	low score: Waikialoid A_130022	[M+H]+	C52H54N6O7	Indolocarbazoles	WZHCMAFZIFECCV-LYUUMHETSA-N	CC1(C)C=CC2=C3C(C([C@@]4([H])C5(N6)C(C[C@]7(N(CCC7)C5=O)C6=O)C8(C)C)([C@@](C9(N%104)C(C[C@@]%11(N(CCC%11)C9=O)C%10=O)C%12(C)C)([H])C%13=C%12NC%14=C(C=CC(C)(C)O%15)C%15=CC=C%14%13)C8=[N+]3[O-])=CC=C2O1	0.28126	0.0011794	1.75573
340	Positive	7.068	972.789	Unknown	[M+H]+	null	null	null	null	0.28759	0.0011794	1.96375
341	Negative	6.908	572.208	Unknown	[M-H]-	null	null	null	null	0.053972	0.0011794	1.55749
342	Negative	10.619	599.23	Unknown	[M-H]-	null	null	null	null	0.063445	0.0011794	1.42961
343	Positive	8.584	542.325	low score: (3E,7E,11E,15E)-5,9,13,17,18-pentahydroxy-4,6,8,10-tetramethyl-2-[(E)-2-methylbut-2-enyl]nonadeca-3,7,11,15-tetraenedioic acid	[M+NH4]+	C28H44O9	Very long-chain fatty acids	YKAQENKKQWMYFZ-SLELSECNSA-N	O=C(O)C(O)C(O)C=CCC(O)C=CC(C)C(O)C(=CC(C)C(O)C(=CC(C(=O)O)CC(=CC)C)C)C	4.0424	0.0011831	1.23627
344	Positive	8.77	542.372	low score: NCGC00381175-01!3-hydroxy-2-[[3-[3-(3-hydroxy-6-methylheptanoyl)oxy-6-methylheptanoyl]oxy-8-methylnonanoyl]amino]propanoic acid [IIN-based on: CCMSLIB00000848442]	[M-H2O+H]+	C29H53NO9	N-acyl-alpha amino acids	MWZPHNZNPKKSEI-UHFFFAOYSA-N	CC(C)CCCCC(CC(=O)NC(CO)C(O)=O)OC(=O)CC(CCC(C)C)OC(=O)CC(O)CCC(C)C	0.35155	0.0011841	1.96424
345	Positive	12.079	355.32	Unknown	[M+H]+	null	null	null	null	0.34663	0.0011936	1.54582
346	Negative	12.32	514.261	Unknown	[M-H]-	null	null	null	null	0.061175	0.0011936	1.43315
347	Positive	8.775	544.387	Unknown	[M+H]+	null	null	null	null	0.30767	0.0012042	1.75582
348	Positive	13.676	538.469	Unknown	[M+H]+	null	null	null	null	0.33145	0.0012042	1.67748
349	Positive	0.345	281.05	no MS2: Lapachol	[M+K]+	C15H14O3	Vitamin K compounds	CIEYTVIYYGTCCI-UHFFFAOYSA-N	O=C1C(O)=C(C(=O)C=2C=CC=CC12)CC=C(C)C	2.8617	0.0012042	1.48287
350	Positive	9.016	508.345	Unknown	[M+H]+	null	null	null	null	3.632	0.0012042	1.23277
351	Negative	10.555	498.266	low score: Phosphatidylethanolamine lyso 20:5	[M-H]-	C25H42NO7P	2-acyl-sn-glycero-3-phosphoethanolamines	UNILCTDPRMGSDM-JEBPEJKESA-N	CCCC=CCC=CCC=CCC=CCC=CCCC(=O)OC(CO)COP(O)(=O)OCCN	0.10947	0.0012042	1.50813
352	Negative	0.285	736.488	low score: PE 36:5	[M-H]-	C41H72NO8P	Phosphatidylethanolamines	CXGZFWPMXPAZEA-NUNQZGBLSA-N	CCCCCC\C=C/CCCCCCCC(=O)OCC(COP(O)(=O)OCCN)OC(=O)CCCCCC\C=C/C\C=C/C\C=C/C\C=C/CC	0.40247	0.0012042	1.35615
353	Positive	13.686	537.201	no MS2: NCGC00381289-01_C26H32O12_Cyclopenta[c]pyran-4-carboxylic acid, 1-(beta-D-glucopyranosyloxy)-1,4a,5,6,7,7a-hexahydro-5-hydroxy-7-methyl-6-[[(2E)-1-oxo-3-phenyl-2-propen-1-yl]oxy]-, methyl ester, (1S,4aS,5S,6R,7R,7aR)-	[M+H]+	C26H32O12	Iridoid O-glycosides	KWXCZSMMAKGXBP-DSADJFPISA-N	COC(=O)C/1=C/O[C@@H](O[C@@H]2O[C@H](CO)[C@@H](O)[C@H](O)[C@H]2O)[C@@H]3[C@@H](C)[C@@H](OC(=O)/C=C/C4=CC=CC=C4)[C@@H](O)[C@H]13	2.2004	0.0012158	1.43323
354	Negative	7.045	484.247	Unknown	[M-H]-	null	null	null	null	0.048358	0.0012318	1.38551
355	Positive	15.985	782.635	Unknown	[M+H]+	null	null	null	null	0.31864	0.0012335	1.95046
356	Positive	10.85	808.107	Unknown	[M+H]+	null	null	null	null	0.26977	0.0012342	1.80874
357	Negative	10.97	572.219	Unknown	[M-H]-	null	null	null	null	0.070032	0.0012342	1.35113
358	Negative	6.72	626.242	Unknown	[M-H]-	null	null	null	null	0.080509	0.0012378	1.59723
359	Positive	16.03	761.588	Unknown	[M+H]+	null	null	null	null	0.18734	0.0012405	1.46385
360	Positive	1.371	806.639	Unknown	[M+H]+	null	null	null	null	0.2643	0.0012434	1.42061
361	Negative	12.441	574.217	Unknown	[M-H]-	null	null	null	null	0.05523	0.0012506	1.46478
362	Negative	1.256	634.192	Unknown	[M-H]-	null	null	null	null	0.0362	0.0012506	1.72018
363	Positive	8.736	592.387	no MS2: Edpetiline	[M+Na]+	C33H53NO8	Steroidal saponins	DHQFYEJMFMYGCV-UHFFFAOYSA-N	O=C1CC2C3CCC4C(CN5CC(C)CCC5C4(O)C)C3CC2C6(C)CCC(OC7OC(CO)C(O)C(O)C7O)CC16	0.36982	0.0012573	1.42188
364	Positive	18.343	876.637	Unknown	[M+H]+	null	null	null	null	0.27727	0.0012573	1.52212
365	Negative	9.156	498.263	low score: Phosphatidylethanolamine lyso 20:5	[M-H]-	C25H42NO7P	2-acyl-sn-glycero-3-phosphoethanolamines	UNILCTDPRMGSDM-JEBPEJKESA-N	CCCC=CCC=CCC=CCC=CCC=CCCC(=O)OC(CO)COP(O)(=O)OCCN	0.094648	0.0012573	1.41963
366	Negative	10.8	514.26	Unknown	[M-H]-	null	null	null	null	0.057408	0.0012573	1.47345
367	Negative	1.128	742.18	Unknown	[M-H]-	null	null	null	null	0.2196	0.0012573	1.24412
368	Positive	10.75	636.426	Unknown	[M+H]+	null	null	null	null	4.6225	0.0012675	1.26738
369	Negative	1.256	713.191	low score: Unknown (carbon number 30); PlaSMA ID-1921	[M-H]-	C30H38N2O18	Unknown	null	null	0.046944	0.0012675	1.6531
370	Positive	13.468	679.481	Unknown	[M+H]+	null	null	null	null	0.27093	0.0012718	1.73063
371	Positive	0.816	297.083	no MS2: Flunixine	[M+H]+	C14H11F3N2O2	Trifluoromethylbenzenes	NOOCSNJCXJYGPE-UHFFFAOYSA-N	CC1=C(C=CC=C1NC2=C(C=CC=N2)C(=O)O)C(F)(F)F	3.8448	0.0012718	1.15624
372	Positive	11.298	662.488	Unknown	[M+H]+	null	null	null	null	12.401	0.0012718	1.35076
373	Positive	16.699	782.635	Unknown	[M+H]+	null	null	null	null	0.31263	0.0012718	1.90819
374	Positive	0.269	806.639	Unknown	[M+H]+	null	null	null	null	0.30327	0.0012718	1.89976
375	Positive	14.545	832.655	Unknown	[M+H]+	null	null	null	null	0.36858	0.0012718	1.73866
376	Negative	6.736	514.258	Unknown	[M-H]-	null	null	null	null	0.046976	0.0012718	1.62764
377	Negative	10.287	599.23	Unknown	[M-H]-	null	null	null	null	0.06187	0.0012718	1.41625
378	Negative	1.281	610.173	Unknown	[M-H]-	null	null	null	null	0.036305	0.0012718	1.64409
379	Negative	1.014	844.159	Unknown	[M-H]-	null	null	null	null	0.37556	0.0012718	1.34551
380	Negative	7.837	863.335	Unknown	[M-H]-	null	null	null	null	3.3005	0.0012718	1.4326
381	Negative	1.163	867.987	Unknown	[M-H]-	null	null	null	null	0.12108	0.0012718	1.30747
382	Negative	1.105	396.724	Unknown	[M-H]-	null	null	null	null	0.49375	0.0012776	1.52055
383	Positive	12.753	904.663	Unknown	[M+H]+	null	null	null	null	0.1924	0.0012839	1.6448
384	Positive	14.296	772.602	Unknown	[M+H]+	null	null	null	null	8.7118	0.0012928	1.41882
385	Negative	0.403	512.241	Unknown	[M-H]-	null	null	null	null	0.11638	0.0013052	1.48218
386	Positive	10.865	614.395	low score: Edpetiline	[M+Na]+	C33H53NO8	Steroidal saponins	DHQFYEJMFMYGCV-UHFFFAOYSA-N	O=C1CC2C3CCC4C(CN5CC(C)CCC5C4(O)C)C3CC2C6(C)CCC(OC7OC(CO)C(O)C(O)C7O)CC16	0.299	0.0013054	1.80705
387	Positive	13.499	820.604	Unknown	[M+H]+	null	null	null	null	0.3601	0.0013246	1.62832
388	Positive	8.223	506.37	Unknown	[M+H]+	null	null	null	null	0.36854	0.001327	1.50252
389	Positive	8.109	564.358	low score: NCGC00381435-01!13-dodecan-2-yl-6-(1-hydroxyethyl)-3-(hydroxymethyl)-12-methyl-9-propan-2-yl-1-oxa-4,7,10-triazacyclotridecane-2,5,8,11-tetrone [IIN-based on: CCMSLIB00000848775]	[M+Na]+	C28H51N3O7	Cyclic depsipeptides	PVAWVKQDYYTSIE-UHFFFAOYSA-N	CCCCCCCCCCC(C)C1OC(=O)C(CO)NC(=O)C(NC(=O)C(NC(=O)C1C)C(C)C)C(C)O	0.29643	0.001327	1.41796
390	Negative	11.412	514.258	Unknown	[M-H]-	null	null	null	null	0.058251	0.0013368	1.42673
391	Positive	8.12	867.446	low score: Ferintoic acid A	[M+H]+	C46H58N8O9	Oligopeptides	ZATXZWLJJMKQDB-AOWMEVDFSA-N	CC(C)[C@@H]1NC(=O)[C@@H](CCCCNC(=O)[C@H](CC2=CC=CC=C2)NC(=O)[C@H](C)N(C)C(=O)[C@H](CCC2=CC=C(O)C=C2)NC1=O)NC(=O)NC(CC1=CNC2=C1C=CC=C2)C(O)=O	0.18245	0.0013507	1.68321
392	Positive	7.063	875.213	Unknown	[M+H]+	null	null	null	null	0.28476	0.0013656	1.86395
393	Positive	7.087	973.013	Unknown	[M+H]+	null	null	null	null	0.29346	0.0013656	1.69404
394	Positive	11.332	325.267	low score: NCGC00180676-03_C20H36O3_1-Naphthalenepentanoic acid, decahydro-2-hydroxy-beta,2,5,5,8a-pentamethyl-, (betaS,1R,2R,8aS)-	[M+H]+	C20H36O3	Diterpenoids	KHCCSRVJJDOANA-ZOSGAXDSSA-N	C[C@@H](CC[C@H]1[C@](C)(O)CCC2C(C)(C)CCC[C@]12C)CC(O)=O	0.28359	0.001367	1.52448
395	Negative	1.296	642.128	Unknown	[M-H]-	null	null	null	null	0.030737	0.001367	1.54065
396	Negative	1.294	626.153	Unknown	[M-H]-	null	null	null	null	0.037766	0.0013697	1.52821
397	Positive	12.673	822.602	Unknown	[M+H]+	null	null	null	null	3.2908	0.001388	1.18687
398	Negative	10.8	512.242	Unknown	[M-H]-	null	null	null	null	0.060329	0.0014044	1.3799
399	Positive	1.199	820.972	Unknown	[M+H]+	null	null	null	null	0.35226	0.0014061	1.32611
400	Negative	8.818	498.264	no MS2: Phosphatidylethanolamine lyso 20:5	[M-H]-	C25H42NO7P	2-acyl-sn-glycero-3-phosphoethanolamines	UNILCTDPRMGSDM-JEBPEJKESA-N	CCCC=CCC=CCC=CCC=CCC=CCCC(=O)OC(CO)COP(O)(=O)OCCN	0.090761	0.0014061	1.48403
401	Negative	1.245	599.238	Unknown	[M-H]-	null	null	null	null	0.010024	0.0014115	1.49526
402	Positive	0.173	604.435	Unknown	[M+H]+	null	null	null	null	0.05646	0.0014122	1.38061
403	Positive	11.219	572.425	Unknown	[M+H]+	null	null	null	null	0.32928	0.0014208	1.56487
404	Positive	15.126	623.506	Unknown	[M+H]+	null	null	null	null	0.2428	0.0014239	1.57455
405	Negative	7.03	512.635	Unknown	[M-H]-	null	null	null	null	0.049597	0.0014239	1.44002
406	Positive	7.31	318.323	Unknown	[M+H]+	null	null	null	null	0.32169	0.0014314	1.84438
407	Negative	1.276	547.266	low score: 1-[2,4,6-trihydroxy-3-[7-hydroxy-2-(4-hydroxyphenyl)-3,4-dihydro-2H-chromen-4-yl]phenyl]dodecan-1-one	[M-H]-	C33H40O7	7-hydroxyflavonoids	JGXZVDAPLSTBGZ-UHFFFAOYSA-N	O=C(C1=C(O)C=C(O)C(=C1O)C2C3=CC=C(O)C=C3OC(C4=CC=C(O)C=C4)C2)CCCCCCCCCCC	0.078956	0.0014434	1.49027
408	Positive	11.048	678.484	Unknown	[M+H]+	null	null	null	null	9.3859	0.0014469	1.25596
409	Negative	1.037	752.211	Unknown	[M-H]-	null	null	null	null	0.43047	0.0014469	1.31829
410	Positive	12.007	650.485	low score: phosphatidylethanolamine (14:0/15:0)	[M+H]+	C34H68NO8P	Phosphatidylethanolamines	VQQFJLCUEFKGHJ-JGCGQSQUSA-N	[H][C@@](COC(=O)CCCCCCCCCCCCC)(COP(O)(=O)OCCN)OC(=O)CCCCCCCCCCCCCC	7.3618	0.0014612	1.21472
411	Negative	7.045	514.258	Unknown	[M-H]-	null	null	null	null	0.046888	0.0014612	1.53323
412	Negative	10.623	572.214	Unknown	[M-H]-	null	null	null	null	0.077285	0.0014647	1.39192
413	Positive	17.51	648.599	low score: Solanesol_major	[M+NH4]+	C45H74O	Polyprenols	AFPLNGZPBSKHHQ-MEGGAXOGSA-N	CC(C)=CCCC(C)=CCCC(C)=CCCC(C)=CCCC(C)=CCCC(C)=CCCC(C)=CCCC(C)=CCCC(C)=CCO	0.32893	0.0014649	1.82767
414	Negative	1.226	574.211	low score: Zafirlukast	[M-H]-	C31H33N3O6S	Benzenesulfonamides	YEEZWCHGZNKEEK-UHFFFAOYSA-N	O=S(=O)(N=C(O)C1=CC=C(C(OC)=C1)CC2=CN(C=3C=CC(N=C(O)OC4CCCC4)=CC32)C)C=5C=CC=CC5C	0.029612	0.001466	1.52312
415	Negative	8.698	572.216	Unknown	[M-H]-	null	null	null	null	0.074296	0.0014737	1.37962
416	Negative	9.203	574.215	low score: Zafirlukast	[M-H]-	C31H33N3O6S	Benzenesulfonamides	YEEZWCHGZNKEEK-UHFFFAOYSA-N	O=S(=O)(N=C(O)C1=CC=C(C(OC)=C1)CC2=CN(C=3C=CC(N=C(O)OC4CCCC4)=CC32)C)C=5C=CC=CC5C	0.096476	0.0014737	1.39391
417	Negative	1.49	610.182	Unknown	[M-H]-	null	null	null	null	0.033038	0.0014737	1.36216
418	Negative	1.17	804.037	Unknown	[M-H]-	null	null	null	null	0.055952	0.0014737	1.45581
419	Positive	14.336	297.101	no MS2: OCP_297.1002_16.5	[M+H]+	C14H17ClN2O3	Phenylpiperazines	FMKKWAHJJLLAOW-UHFFFAOYSA-N	OC(=O)CCC(=O)N1CCN(CC1)c1ccccc1Cl	2.2929	0.0014957	1.59043
420	Positive	1.537	613.203	low score: Dihydrohesperetin-7-O-neohesperidoside	[M+H]+	C28H36O15	Flavonoid O-glycosides	ITVGXXMINPYUHD-CUVHLRMHSA-N	COC1=C(O)C=C(CCC(=O)C2=C(O)C=C(O[C@@H]3O[C@H](CO)[C@@H](O)[C@H](O)[C@H]3O[C@@H]3O[C@@H](C)[C@H](O)[C@@H](O)[C@H]3O)C=C2O)C=C1	7.1043	0.0014957	1.38022
421	Negative	7.464	596.227	Unknown	[M-H]-	null	null	null	null	0.095609	0.0014957	1.43629
422	Positive	14.918	832.659	Unknown	[M+H]+	null	null	null	null	0.357	0.0015229	1.70629
423	Positive	7.404	340.262	low score: ormosanine	[M+Na]+	C20H35N3	Ormosia-type alkaloids	YUKCLPPRYNXRAF-CPPNMTBBSA-N	N1CCCCC1C23CN4CCCCC4C(CC5CCCNC52)C3	0.3805	0.0015249	1.86184
424	Positive	8.634	508.339	Unknown	[M+H]+	null	null	null	null	0.36727	0.0015338	1.42216
425	Positive	19.75	780.619	Unknown	[M+H]+	null	null	null	null	0.31485	0.0015338	1.75657
426	Negative	10.592	514.259	Unknown	[M-H]-	null	null	null	null	0.057132	0.0015338	1.42682
427	Negative	8.034	515.264	no MS2: 1,6-dihydroxy-8-(hydroxymethyl)-4,12,12,15-tetramethyl-13-[(2-methylpropanoyl)oxy]-5-oxotetracyclo[8.5.0.0?,?.0??,??]pentadeca-3,8-dien-14-yl (2E)-2-methylbut-2-enoate	[M-H]-	C29H40O8	Phorbol esters	MVWXLRYZCZSBKW-OQLLNIDSSA-N	O=C(OC1C(C)C2(O)C(C=C(CO)CC3(O)C(=O)C(=CC32)C)C4C1(OC(=O)C(C)C)C4(C)C)C(=CC)C	0.054361	0.0015341	1.4584
428	Negative	1.179	748.085	Unknown	[M-H]-	null	null	null	null	0.042613	0.0015341	1.45154
429	Negative	1.197	632.169	Unknown	[M-H]-	null	null	null	null	0.017958	0.0015502	1.50908
430	Negative	1.31	640.119	Unknown	[M-H]-	null	null	null	null	0.027027	0.0015519	1.49714
431	Positive	9.958	708.552	Unknown	[M+H]+	null	null	null	null	0.28825	0.0015539	1.53245
432	Positive	10.77	426.393	low score: N-Octanoylsphingosine,D-erythro	[M+H]+	C26H51NO3	Ceramides	APDLCSPGWPLYEQ-WRBRXSDHSA-N	CCCCCCCCCCCCCC=CC(C(CO)NC(=O)CCCCCCC)O	0.26997	0.0015668	1.44576
433	Positive	7.061	972.456	Unknown	[M+H]+	null	null	null	null	0.29373	0.001569	1.84457
434	Positive	12.069	512.461	Unknown	[M+H]+	null	null	null	null	0.383	0.001579	1.82472
435	Negative	9.185	515.265	low score: 1,6-dihydroxy-8-(hydroxymethyl)-4,12,12,15-tetramethyl-13-[(2-methylpropanoyl)oxy]-5-oxotetracyclo[8.5.0.0?,?.0??,??]pentadeca-3,8-dien-14-yl (2E)-2-methylbut-2-enoate	[M-H]-	C29H40O8	Phorbol esters	MVWXLRYZCZSBKW-OQLLNIDSSA-N	O=C(OC1C(C)C2(O)C(C=C(CO)CC3(O)C(=O)C(=CC32)C)C4C1(OC(=O)C(C)C)C4(C)C)C(=CC)C	0.052488	0.001579	1.37206
436	Negative	7.498	496.25	Unknown	[M-H]-	null	null	null	null	0.070367	0.0015835	1.4864
437	Positive	18.883	708.572	Unknown	[M+H]+	null	null	null	null	0.30765	0.0015861	1.80472
438	Positive	1.051	371.097	no MS2: NCGC00169184-02!7-hydroxy-6-methoxy-8-[(2S,3R,4S,5S,6R)-3,4,5-trihydroxy-6-(hydroxymethyl)oxan-2-yl]oxychromen-2-one	[M+H]+	C16H18O10	Coumarin glycosides	CRSFLLTWRCYNNX-QBNNUVSCSA-N	COC1=C(O)C(O[C@@H]2O[C@H](CO)[C@@H](O)[C@H](O)[C@H]2O)=C3OC(=O)C=CC3=C1	2.9738	0.0015861	1.16328
439	Negative	1.288	639.128	low score: NCGC00380922-01![6-[2-(3,4-dihydroxyphenyl)-8-hydroxy-4-oxochromen-7-yl]oxy-3,4,5-trihydroxyoxan-2-yl]methyl (E)-3-(4-hydroxyphenyl)prop-2-enoate	[M+HCOO]-	C30H26O13	Flavonoid-7-O-glycosides	VXAHTPDZSOTOPQ-XCVCLJGOSA-N	OC1C(COC(=O)\C=C\C2=CC=C(O)C=C2)OC(OC3=CC=C4C(=O)C=C(OC4=C3O)C5=CC(O)=C(O)C=C5)C(O)C1O	0.051077	0.0015861	1.45709
440	Negative	1.306	295.591	Unknown	[M-H]-	null	null	null	null	0.48236	0.0015955	1.38783
441	Negative	10.262	514.258	Unknown	[M-H]-	null	null	null	null	0.058779	0.0015991	1.4405
442	Negative	1.247	588.188	Unknown	[M-H]-	null	null	null	null	0.031899	0.0015993	1.45068
443	Positive	17.092	758.634	Unknown	[M+H]+	null	null	null	null	0.2682	0.0016002	1.79559
444	Positive	9.193	652.429	low score: NCGC00385023-01_C36H58O9_(1S,7S,9beta,23E)-9-Formyl-1,25-dihydroxy-10,14-dimethyl-4,9-cyclo-9,10-secocholesta-5,23-dien-7-yl beta-D-glucopyranoside	[M+NH4]+	C36H58O9	Cucurbitacins	BOHOBTRHAFBJOW-GXLHQHSHSA-N	C[C@H](C\C=C\C(C)(C)O)[C@H]1CC[C@@]2(C)[C@@H]3[C@@H](O[C@@H]4O[C@H](CO)[C@@H](O)[C@H](O)[C@H]4O)/C=C/5C(CC[C@H](O)C5(C)C)[C@@]3(CC[C@]12C)C=O	13.017	0.0016029	1.2165
445	Negative	1.296	644.119	Unknown	[M-H]-	null	null	null	null	0.035295	0.0016029	1.59436
446	Positive	17.701	659.546	Unknown	[M+H]+	null	null	null	null	0.32793	0.0016097	1.66001
447	Positive	1.052	204.123	O-ACETYLCARNITINE	[M+H]+	C9H17NO4	Acyl carnitines	RDHQFKQIGNGIED-UHFFFAOYSA-N	CC(=O)OC(CC([O-])=O)C[N+](C)(C)C	3.0759	0.0016149	1.29394
448	Positive	13.802	772.604	Unknown	[M+H]+	null	null	null	null	6.1519	0.0016149	1.34517
449	Positive	13.697	654.392	Unknown	[M+H]+	null	null	null	null	0.2992	0.0016162	1.88633
450	Positive	5.531	297.097	no MS2: OCP_297.1002_16.5	[M+H]+	C14H17ClN2O3	Phenylpiperazines	FMKKWAHJJLLAOW-UHFFFAOYSA-N	OC(=O)CCC(=O)N1CCN(CC1)c1ccccc1Cl	4.3861	0.0016162	1.87159
451	Positive	0.681	237.946	Unknown	[M+H]+	null	null	null	null	7.2906	0.0016162	1.65969
452	Positive	9.178	504.352	low score: NCGC00380972-01_C32H45N3O2_	[M+H]+	C32H45N3O2	Pyrroloindoles	IXMZEPKYPFQFJN-QNFIBVQNSA-N	CC(C)C[C@@H]1NC(=O)[C@@H]2C[C@]34C[C@@H]5[C@@]6(C)CCCC(C)(C)C6CC[C@@]5(C)N([C@H]3N2C1=O)C7=CC=CC=C47	0.38826	0.0016162	1.55852
453	Negative	9.179	514.259	Unknown	[M-H]-	null	null	null	null	0.052531	0.0016162	1.44524
454	Negative	6.867	570.198	Unknown	[M-H]-	null	null	null	null	0.049489	0.0016162	1.52126
455	Negative	10.862	574.208	Unknown	[M-H]-	null	null	null	null	0.076766	0.0016162	1.42078
456	Negative	1.293	628.15	Unknown	[M-H]-	null	null	null	null	0.041435	0.0016162	1.60336
457	Negative	1.197	646.141	Unknown	[M-H]-	null	null	null	null	0.032086	0.001634	1.44004
458	Negative	10.174	499.27	no MS2: NCGC00385001-01!5-[3-[[(E)-3-(3,4-dihydroxyphenyl)prop-2-enoyl]oxymethyl]-5-hydroxypentyl]-5,6,8a-trimethyl-3,4,4a,6,7,8-hexahydronaphthalene-1-carboxylic acid	[M-H]-	C29H40O7	Colensane and clerodane diterpenoids	UVGRPMWFXIDHJC-CSKARUKUSA-N	CC1CCC2(C)C(CCC=C2C(O)=O)C1(C)CCC(CCO)COC(=O)\C=C\C3=CC(O)=C(O)C=C3	0.10884	0.0016437	1.49417
459	Positive	9.345	636.433	Unknown	[M+H]+	null	null	null	null	18.943	0.0016526	1.56311
460	Negative	1.176	777.162	Unknown	[M-H]-	null	null	null	null	0.085145	0.0016526	1.40885
461	Positive	6.298	520.367	low score: 3,12-dihydroxy-4,6a,6b,11,12,14b-hexamethyl-1,2,3,4a,5,6,7,8,9,10,11,12a,14,14a-tetradecahydropicene-4,8a-dicarboxylic acid_major	[M+NH4]+	C30H46O6	Triterpenoids	UIEGOKVPCRANSU-UHFFFAOYSA-N	CC1CCC2(C(=O)O)CCC3(C)C(=CCC4C5(C)CCC(O)C(C)(C(=O)O)C5CCC43C)C2C1(C)O	2.1496	0.0016532	1.49655
462	Positive	8.11	956.617	Unknown	[M+H]+	null	null	null	null	0.28417	0.0016542	1.75409
463	Negative	9.396	514.278	low score: TaurocholicAcid	[M-H]-	C26H45NO7S	Trihydroxy bile acids, alcohols and derivatives	WBWWGRHZICKQGZ-HZAMXZRMSA-N	CC(CCC(=O)NCCS(=O)(=O)O)C1CCC2C1(C(CC3C2C(CC4C3(CCC(C4)O)C)O)O)C	0.080818	0.0016545	1.42449
464	Positive	0.2	698.558	Unknown	[M+H]+	null	null	null	null	0.24962	0.0016615	1.66282
465	Negative	1.236	556.219	Unknown	[M-H]-	null	null	null	null	0.025535	0.0016725	1.47902
466	Negative	9.878	640.306	Unknown	[M-H]-	null	null	null	null	2.4435	0.0016846	1.37452
467	Positive	18.259	758.636	Unknown	[M+H]+	null	null	null	null	0.29977	0.0016905	1.88472
468	Negative	0.971	323.893	Unknown	[M-H]-	null	null	null	null	0.42807	0.0017112	1.28129
469	Positive	11.916	644.552	Unknown	[M+H]+	null	null	null	null	0.35251	0.0017134	1.58195
470	Positive	11.793	560.42	Unknown	[M+H]+	null	null	null	null	0.33716	0.0017191	1.55322
471	Negative	1.262	678.205	Unknown	[M-H]-	null	null	null	null	0.065278	0.0017328	1.42054
472	Negative	7.016	677.094	Unknown	[M-H]-	null	null	null	null	0.069612	0.0017405	1.4795
473	Negative	1.163	921.949	Unknown	[M-H]-	null	null	null	null	0.083229	0.0017405	1.45085
474	Positive	11.51	325.26	Unknown	[M+H]+	null	null	null	null	0.37097	0.0017412	1.8376
475	Positive	10.55	720.493	Unknown	[M+H]+	null	null	null	null	4.4427	0.0017412	1.37628
476	Positive	12.433	374.338	low score: N-Benzylstearamide	[M+H]+	C25H43NO	N-acyl amines	IXODJGLAVBPVSW-UHFFFAOYSA-N	O=C(NCC=1C=CC=CC1)CCCCCCCCCCCCCCCCC	0.33674	0.0017521	1.63137
477	Positive	14.248	638.554	Unknown	[M+H]+	null	null	null	null	0.29866	0.0017756	1.74988
478	Positive	12.524	287.258	Unknown	[M+H]+	null	null	null	null	0.47061	0.0017756	1.68204
479	Positive	13.476	784.655	Unknown	[M+H]+	null	null	null	null	0.38057	0.0017756	1.53651
480	Negative	8.698	499.266	no MS2: NCGC00385001-01!5-[3-[[(E)-3-(3,4-dihydroxyphenyl)prop-2-enoyl]oxymethyl]-5-hydroxypentyl]-5,6,8a-trimethyl-3,4,4a,6,7,8-hexahydronaphthalene-1-carboxylic acid	[M-H]-	C29H40O7	Colensane and clerodane diterpenoids	UVGRPMWFXIDHJC-CSKARUKUSA-N	CC1CCC2(C)C(CCC=C2C(O)=O)C1(C)CCC(CCO)COC(=O)\C=C\C3=CC(O)=C(O)C=C3	0.11066	0.0017756	1.31921
481	Negative	1.152	717.142	no MS2: NCGC00380524-01!(2R)-2-[(E)-3-[3-[(1R)-1-carboxy-2-(3,4-dihydroxyphenyl)ethoxy]carbonyl-2-(3,4-dihydroxyphenyl)-7-hydroxy-2,3-dihydro-1-benzofuran-4-yl]prop-2-enoyl]oxy-3-(3,4-dihydroxyphenyl)propanoic acid	[M-H]-	C36H30O16	2-arylbenzofuran flavonoids	SNKFFCBZYFGCQN-FTNWOIIGSA-N	OC(=O)[C@@H](CC1=CC=C(O)C(O)=C1)OC(=O)\C=C\C2=CC=C(O)C3=C2C(C(O3)C4=CC=C(O)C(O)=C4)C(=O)O[C@H](CC5=CC(O)=C(O)C=C5)C(O)=O	0.23242	0.0017756	1.34282
482	Negative	1.187	690.123	Unknown	[M-H]-	null	null	null	null	0.024486	0.0017786	1.45334
483	Positive	8.553	602.315	no MS2: NCGC00384679-01_C33H44O9_(1S,2S,3aR,4S,5S,6E,9R,11R,12E,13aS)-4,9,11-Triacetoxy-3a-hydroxy-2,5,8,8,12-pentamethyl-2,3,3a,4,5,8,9,10,11,13a-decahydro-1H-cyclopenta[12]annulen-1-yl benzoate	[M+NH4]+	C33H44O9	Jatrophane and cyclojatrophane diterpenoids	BRVXVMOWTHQKHC-LKCWGRRXSA-N	C[C@H]1C[C@]2(O)[C@@H](OC(C)=O)[C@@H](C)/C=C/C(C)(C)[C@@H](C[C@@H](OC(C)=O)\C(=C\[C@H]2[C@H]1OC(=O)C3=CC=CC=C3)C)OC(C)=O	20.571	0.0017895	1.28172
484	Negative	0.083	155.859	Unknown	[M-H]-	null	null	null	null	0.46068	0.0017895	1.46416
485	Negative	1.277	512.644	Unknown	[M-H]-	null	null	null	null	0.023335	0.0017895	1.44884
486	Negative	1.202	558.217	Unknown	[M-H]-	null	null	null	null	0.045143	0.0017895	1.39443
487	Positive	14.908	780.626	Unknown	[M+H]+	null	null	null	null	0.33992	0.0017937	1.65937
488	Negative	9.886	517.26	Unknown	[M-H]-	null	null	null	null	0.075343	0.0017937	1.35937
489	Negative	1.232	572.215	Unknown	[M-H]-	null	null	null	null	0.02813	0.0017991	1.54632
490	Positive	6.002	239.149	low score: Pentaethylene glycol	[M+H]+	C10H22O6	Polyethylene glycols	JLFNLZLINWHATN-UHFFFAOYSA-N	OCCOCCOCCOCCOCCO	2.3749	0.0017995	1.14913
491	Positive	10.308	388.248	low score: (1r,5R,7S)-5,7-diethyl-2-(1-ethyl-2-methyl-1H-indol-3-yl)-1,3-diazaadamantan-6-one	[M+Na]+	C23H31N3O	N-alkylindoles	KRYFHYSXWHRZKT-BRTIRZTQSA-N	O=C1C2(CN3CC1(CN(C2)C3C=4C=5C=CC=CC5N(C4C)CC)CC)CC	0.3432	0.0018152	1.82335
492	Negative	6.56	588.202	Unknown	[M-H]-	null	null	null	null	0.087664	0.0018211	1.54844
493	Positive	10.31	163.09	Unknown	[M+H]+	null	null	null	null	0.42026	0.0018212	1.76774
494	Positive	12.046	824.625	Unknown	[M+H]+	null	null	null	null	8.6118	0.0018212	1.54451
495	Positive	9.038	241.197	low score: h_14_19_norandrosterone	[M-2H2O+H]+	C18H28O2	Estrogens and derivatives	UOUIARGWRPHDBX-CQZDKXCPSA-N	O[C@@H]1CC[C@@]2([H])[C@](CC[C@]3([H])[C@]2([H])CC[C@@]4(C)[C@@]3([H])CCC4=O)([H])C1	0.4059	0.0018405	1.72283
496	Positive	16.069	755.623	low score: (2E,6E)-3,7,11,15,19,23,27,31,35-nonamethylhexatriaconta-2,6,34-triene-1,10,11,15,19,23,27,31-octol	[M+H]+	C45H86O8	Polyprenols	MFQDKOXWQXOOAO-YAHSWYSTSA-N	OCC=C(C)CCC=C(C)CCC(O)C(O)(C)CCCC(O)(C)CCCC(O)(C)CCCC(O)(C)CCCC(O)(C)CCCC(O)(C)CCC=C(C)C	0.19631	0.0018405	1.49796
497	Negative	9.281	999.587	Unknown	[M-H]-	null	null	null	null	2.1403	0.0018405	1.43539
498	Positive	8.166	535.365	Unknown	[M+H]+	null	null	null	null	0.33964	0.0018488	1.20732
499	Negative	9.864	650.337	Unknown	[M-H]-	null	null	null	null	2.1444	0.0018637	1.27944
500	Negative	6.732	545.245	low score: Confluentic acid	[M+HCOO]-	C28H36O8	Depsides and depsidones	UANVCGQMNRTKGM-UHFFFAOYSA-N	CCCCCc1cc(cc(c1C(=O)O)OC)OC(=O)c1c(cc(cc1CC(=O)CCCCC)OC)O	0.06053	0.0018773	1.41491
501	Positive	0.486	342.929	Unknown	[M+H]+	null	null	null	null	0.37107	0.0018814	1.85058
502	Positive	15.301	752.653	Unknown	[M+H]+	null	null	null	null	0.33584	0.0018814	1.72362
503	Positive	6.07	283.176	low score: Hexaethylene glycol; CE10; IIRDTKBZINWQAW-UHFFFAOYSA-N	[M+H]+	C12H26O7	Polyethylene glycols	IIRDTKBZINWQAW-UHFFFAOYSA-N	C(COCCOCCOCCOCCOCCO)O	2.0508	0.0018927	1.14136
504	Positive	9.583	603.331	low score: (1S,2S,5R,7R,10S,11S,14R,16R,19S,20S,23R,25R)-5,14-diethyl-2,11,20,23-tetramethyl-4,13,22,28,29,30-hexaoxatetracyclo[23.2.1.1?,??.1??,??]triacontane-3,12,21-trione	[M+H-2H2O]+	C32H52O9	Macrolides and analogues	MXZXIBZNZUOHER-VHWZNAHMSA-N	O=C1OC(C)CC2OC(CC2)C(C(=O)OC(CC)CC3OC(CC3)C(C(=O)OC(CC)CC4OC(CC4)C1C)C)C	22.317	0.0018927	1.29671
505	Positive	8.742	480.341	low score: Alanine conjugated cholic acid	[M+H]+	C27H45NO6	Glycinated bile acids and derivatives	AZWGEBXBDOIOHW-RXUONNPESA-N	C[C@H](CCC(N[C@@H](C)C(O)=O)=O)[C@H]1CC[C@@]2([H])[C@]3([H])[C@H](O)C[C@]4([H])C[C@H](O)CC[C@]4(C)[C@H]3C[C@H](O)[C@@]21C	0.40214	0.0018949	1.66064
506	Negative	7.908	513.245	no MS2: Lucidenic acid D	[M-H]-	C29H38O8	Triterpenoids	LTJSBYAKDOGXLX-JTJCPSTFSA-N	O=C(OC1C(=O)C2=C(C(=O)CC3C(C(=O)CCC23C)(C)C)C4(C(=O)CC(C(C)CCC(=O)O)C14C)C)C	0.061491	0.0018977	1.3949
507	Negative	7.02	516.32	Unknown	[M-H]-	null	null	null	null	0.035108	0.0018977	1.39094
508	Positive	5.957	217.12	low score: 5-isopropenyl-2-methyl-2-cyclohexen-1-yl acetate	[M+Na]+	C12H18O2	Menthane monoterpenoids	YTHRBOFHFYZBRJ-VXGBXAGGSA-N	O=C(OC1C(=CCC(C(=C)C)C1)C)C	2.43	0.0019003	1.19888
509	Negative	8.85	515.262	low score: 1,6-dihydroxy-8-(hydroxymethyl)-4,12,12,15-tetramethyl-13-[(2-methylpropanoyl)oxy]-5-oxotetracyclo[8.5.0.0?,?.0??,??]pentadeca-3,8-dien-14-yl (2E)-2-methylbut-2-enoate	[M-H]-	C29H40O8	Phorbol esters	MVWXLRYZCZSBKW-OQLLNIDSSA-N	O=C(OC1C(C)C2(O)C(C=C(CO)CC3(O)C(=O)C(=CC32)C)C4C1(OC(=O)C(C)C)C4(C)C)C(=CC)C	0.074832	0.0019003	1.44462
510	Negative	0.42	514.261	Unknown	[M-H]-	null	null	null	null	0.1135	0.0019107	1.40887
511	Negative	1.299	612.23	Unknown	[M-H]-	null	null	null	null	0.036548	0.0019157	1.39708
512	Negative	1.423	684.103	Unknown	[M-H]-	null	null	null	null	0.052232	0.0019159	1.46078
513	Negative	9.86	642.306	Unknown	[M-H]-	null	null	null	null	2.0669	0.0019224	1.36566
514	Negative	1.103	103.037	no MS2: 2-HYDROXYBUTYRIC ACID	[M-H]-	C4H8O3	Alpha hydroxy acids and derivatives	AFENDNXGAFYKQO-VKHMYHEASA-N	CC[C@@H](C(=O)O)O	0.48922	0.0019294	1.41725
515	Negative	8.835	514.26	Unknown	[M-H]-	null	null	null	null	0.053721	0.0019294	1.4305
516	Negative	6.757	582.251	low score: Tricoumaroyl spermidine; PlaSMA ID-1607	[M-H]-	C34H37N3O6	Coumaric acid and derivatives	PFDVWJCSCYDRMZ-UHFFFAOYSA-N	O=C(C=CC1=CC=C(O)C=C1)NCCCN(C(=O)C=CC2=CC=C(O)C=C2)CCCCNC(=O)C=CC3=CC=C(O)C=C3	0.056079	0.0019294	1.44143
517	Positive	17.791	637.526	Unknown	[M+H]+	null	null	null	null	0.35215	0.0019308	1.71496
518	Negative	0.382	572.214	Unknown	[M-H]-	null	null	null	null	0.10931	0.0019327	1.52161
519	Negative	1.116	283.089	no MS2: Helicin	[M-H]-	C13H16O7	Phenolic glycosides	BGOFCVIGEYGEOF-UJPOAAIJSA-N	O=CC=1C=CC=CC1OC2OC(CO)C(O)C(O)C2O	0.4185	0.0019365	1.30878
520	Positive	13.352	369.273	low score: Dihydromuronic acid	[M+K]+	C21H36O5	Gamma butyrolactones	SPGPUDJMXMJNCU-JLAWEPINSA-N	CC(=O)CCCCCCCCCCCCC[C@@H]1C(C(C)C(=O)O1)C(=O)O	0.32319	0.0019409	1.59847
521	Positive	10.962	428.416	Unknown	[M+H]+	null	null	null	null	0.31727	0.0019609	1.20312
522	Positive	14.911	758.634	Unknown	[M+H]+	null	null	null	null	0.35789	0.0019609	1.32683
523	Positive	18.915	982.326	Unknown	[M+H]+	null	null	null	null	8.0387	0.0019609	1.00916
524	Negative	1.178	746.078	Unknown	[M-H]-	null	null	null	null	0.040786	0.0019609	1.38243
525	Negative	1.105	758.107	Unknown	[M-H]-	null	null	null	null	0.15627	0.0019609	1.20358
526	Negative	10.608	499.268	no MS2: NCGC00385001-01!5-[3-[[(E)-3-(3,4-dihydroxyphenyl)prop-2-enoyl]oxymethyl]-5-hydroxypentyl]-5,6,8a-trimethyl-3,4,4a,6,7,8-hexahydronaphthalene-1-carboxylic acid	[M-H]-	C29H40O7	Colensane and clerodane diterpenoids	UVGRPMWFXIDHJC-CSKARUKUSA-N	CC1CCC2(C)C(CCC=C2C(O)=O)C1(C)CCC(CCO)COC(=O)\C=C\C3=CC(O)=C(O)C=C3	0.13791	0.0019615	1.42563
527	Negative	9.508	514.259	Unknown	[M-H]-	null	null	null	null	0.055759	0.0019667	1.39003
528	Positive	7.866	316.217	low score: "Saxagliptin (BMS-477118,Onglyza)"	[M+H]+	C18H25N3O2	Alpha amino acid amides	QGJUIPDUBHWZPV-BBIKMUCQSA-N	C1C2CC3(CC1CC(C2)(O)C3)[C@@H](C(N4[C@@H](C[C@]5([C@]4(C5)[H])[H])C#N)=O)N	0.35159	0.0019677	1.86722
529	Positive	11.059	636.471	Unknown	[M+H]+	null	null	null	null	6.3203	0.0019767	1.11756
530	Negative	8.664	514.259	Unknown	[M-H]-	null	null	null	null	0.052594	0.0019876	1.43864
531	Negative	7.031	545.241	low score: 6-HYDROXYANGOLENSIC ACID METHYL ESTER	[M+CH3COO]-	C27H34O8	Limonoids	GOYZKWCPWBKPIG-RNKBQGBYSA-N	O=C1OC(C2=COC=C2)C3(C)CCC4C(=C)C3(OC5CC(=O)C(C)(C)C(C(O)C(=O)OC)C54C)C1	0.07132	0.0019876	1.32587
532	Negative	6.549	640.132	Unknown	[M-H]-	null	null	null	null	0.018144	0.0019876	1.37939
533	Negative	7.672	531.276	low score: MGMG 16:3; PlaSMA ID-1464	[M+HCOO]-	C25H42O9	Lipids	LJVATEUJGAWSPM-UHFFFAOYNA-N	O=C(OC(CO)COC1OC(CO)C(O)C(O)C1(O))CCCCCC=CCC=CCC=CCC	0.094491	0.0019918	1.43378
534	Negative	1.513	592.196	Unknown	[M-H]-	null	null	null	null	0.084471	0.0019918	1.20387
535	Positive	1.506	218.138	Propionylcarnitine	[M+H]+	C10H19NO4	Acyl carnitines	UFAHZIUFPNSHSL-UHFFFAOYSA-N	O=C([O-])CC(OC(=O)CC)C[N+](C)(C)C	0.46476	0.0020174	1.62147
536	Positive	10.54	402.391	Unknown	[M+H]+	null	null	null	null	0.33141	0.0020213	1.45696
537	Negative	7.334	531.27	no MS2: 3,16-Dideoxymexicanolide-3Beta-Diol	[M+CH3COO]-	C27H36O7	Naphthopyrans	CNSUXOYAIZBGRY-AJTZKIQZSA-N	O=C(OC)CC1C2(C(=O)C(CC3=C4CC(O)OC(C5=COC=C5)C4(C)CCC32)C(O)C1(C)C)C	0.11271	0.0020213	1.36883
538	Negative	6.594	626.145	Unknown	[M-H]-	null	null	null	null	0.044955	0.0020277	1.40148
539	Negative	1.244	648.216	Unknown	[M-H]-	null	null	null	null	0.050597	0.0020704	1.51572
540	Positive	1.187	338.07	no MS2: Famotidine	[M+H]+	C8H15N7O2S3	2,4-disubstituted thiazoles	XUFQPHANEAPEMJ-UHFFFAOYSA-N	O=S(=O)(N)NC(=N)CCSCC=1N=C(SC1)NC(=N)N	3.7243	0.0020777	1.23358
541	Positive	9.251	755.565	Unknown	[M+H]+	null	null	null	null	0.32017	0.0020924	1.60999
542	Positive	11.958	427.306	low score: Leupeptin	[M+H]+	C20H38N6O4	Dipeptides	GDBQQVLCIARPGH-IKGGRYGDSA-N	NC(=N)NCCCC(C=O)NC(=O)C(CC(C)C)NC(=O)C(CC(C)C)NC(C)=O	0.38652	0.0020924	1.4256
543	Positive	1.064	167.045	no MS2: 2-Nitrobenzamide	[M+H-2H2O]+	C7H6N2O3	Nitrobenzenes	KLGQWSOYKYFBTR-UHFFFAOYSA-N	NC(=O)C1=C(C=CC=C1)[N+]([O-])=O	0.45519	0.0021099	1.51708
544	Positive	9.766	369.378	low score: tetracosanoic acid	[M+H]+	C24H48O2	Very long-chain fatty acids	QZZGJDVWLFXDLK-UHFFFAOYSA-N	O=C(O)CCCCCCCCCCCCCCCCCCCCCCC	6.3796	0.0021099	1.44501
545	Negative	1.255	704.257	Unknown	[M-H]-	null	null	null	null	0.022765	0.0021099	1.40978
546	Negative	1.277	668.13	Unknown	[M-H]-	null	null	null	null	0.11523	0.0021201	1.21206
547	Negative	8.843	574.212	low score: Zafirlukast	[M-H]-	C31H33N3O6S	Benzenesulfonamides	YEEZWCHGZNKEEK-UHFFFAOYSA-N	O=S(=O)(N=C(O)C1=CC=C(C(OC)=C1)CC2=CN(C=3C=CC(N=C(O)OC4CCCC4)=CC32)C)C=5C=CC=CC5C	0.16502	0.0021298	1.25381
548	Negative	1.509	610.211	Unknown	[M-H]-	null	null	null	null	0.053499	0.0021334	1.27732
549	Positive	8.106	542.372	low score: NCGC00381175-01!3-hydroxy-2-[[3-[3-(3-hydroxy-6-methylheptanoyl)oxy-6-methylheptanoyl]oxy-8-methylnonanoyl]amino]propanoic acid [IIN-based on: CCMSLIB00000848442]	[M-H2O+H]+	C29H53NO9	N-acyl-alpha amino acids	MWZPHNZNPKKSEI-UHFFFAOYSA-N	CC(C)CCCCC(CC(=O)NC(CO)C(O)=O)OC(=O)CC(CCC(C)C)OC(=O)CC(O)CCC(C)C	0.32501	0.0021393	1.40407
550	Negative	1.321	556.306	Unknown	[M-H]-	null	null	null	null	0.028763	0.0021633	1.26408
551	Positive	0.608	332.311	Unknown	[M+H]+	null	null	null	null	0.40338	0.0021859	1.68849
552	Negative	7.262	528.273	low score: 2-[(4S,5S,5aS,9aS)-4-methoxy-6,6,9a-trimethyl-5-[(2E,4E,6E)-octa-2,4,6-trienoyl]oxy-1-oxo-4,5,5a,7,8,9-hexahydro-3H-benzo[e]isoindol-2-yl]pentanedioic acid	[M-H]-	C29H39NO8	Glutamic acid and derivatives	FXPWZCUQBSEHTH-QZRFOHQJSA-N	O=C(OC1C(OC)C2=C(C(=O)N(C2)C(C(=O)O)CCC(=O)O)C3(C)CCCC(C)(C)C13)C=CC=CC=CC	0.04019	0.0021955	1.26572
553	Negative	6.556	624.155	Unknown	[M-H]-	null	null	null	null	0.038457	0.0021986	1.33297
554	Positive	12.424	374.287	low score: Lagochilin	[M+NH4]+	C20H36O5	Diterpenoids	XYPPDQHBNJURHU-RHFXQVJCSA-N	OCCC1(OC2(CC1)C(C)CCC3C(C)(CO)C(O)CCC32C)CO	0.31884	0.0022016	1.62678
555	Positive	12.216	408.407	Unknown	[M+H]+	null	null	null	null	0.39535	0.0022217	1.72949
556	Positive	19.54	824.591	Unknown	[M+H]+	null	null	null	null	0.33435	0.0022217	1.65795
557	Positive	6.419	405.201	low score: 7-[(6-hydroxy-5,5,8a-trimethyl-2-methylidene-3,4,4a,6,7,8-hexahydro-1H-naphthalen-1-yl)methoxy]chromen-2-one	[M+Na]+	C24H30O4	Coumarins and derivatives	FCWYNTDTQPCVPG-UHFFFAOYSA-N	O=C1OC=2C=C(OCC3C(=C)CCC4C(C)(C)C(O)CCC34C)C=CC2C=C1	8.6691	0.0022223	1.3219
558	Negative	1.197	630.171	Unknown	[M-H]-	null	null	null	null	0.024035	0.0022235	1.47459
559	Positive	9.805	435.242	low score: NCGC00380375-01!6-[(4E,6E)-2,3-dihydroxy-4,6-dimethyl-7-(1,2,4-trimethyl-3,6-dioxabicyclo[3.1.0]hexan-4-yl)hepta-4,6-dien-2-yl]-4-methoxy-3,5-dimethylpyran-2-one [IIN-based on: CCMSLIB00000847678]	[M+H]+	C24H34O7	Fatty alcohols	UXTZIHZDUIRZDY-JASOSIDASA-N	COC1=C(C)C(=O)OC(=C1C)C(C)(O)C(O)C(\\C)=C\\C(C)=C\\C2(C)OC(C)C3(C)OC23	7.9724	0.0022276	1.40471
560	Positive	15.35	580.483	Unknown	[M+H]+	null	null	null	null	0.32539	0.0022306	1.58514
561	Positive	15.614	464.417	Unknown	[M+H]+	null	null	null	null	0.33468	0.0022364	1.88703
562	Positive	12.045	463.164	low score: Methylnissolin-3-O-glucoside	[M+H]+	C23H26O10	Pterocarpans	PCIXSTFFMHVOMF-UHFFFAOYSA-N	OCC1OC(OC2=CC=C3C(OCC4C5=CC=C(OC)C(OC)=C5OC34)=C2)C(O)C(O)C1O	16.558	0.0022364	1.22901
563	Negative	1.226	661.25	Unknown	[M-H]-	null	null	null	null	0.040999	0.0022364	1.51253
564	Positive	10.245	606.419	Unknown	[M+H]+	null	null	null	null	5.377	0.0022433	1.15059
565	Negative	7.628	498.263	low score: Phosphatidylethanolamine lyso 20:5	[M-H]-	C25H42NO7P	2-acyl-sn-glycero-3-phosphoethanolamines	UNILCTDPRMGSDM-JEBPEJKESA-N	CCCC=CCC=CCC=CCC=CCC=CCCC(=O)OC(CO)COP(O)(=O)OCCN	0.10088	0.0022433	1.46178
566	Positive	9.061	582.297	low score: NCGC00380158-01!2-[2-[2-[[2-[2-(2-hydroxypropanoylamino)-3-methylbutanoyl]oxy-3-methylbutanoyl]amino]-3-methylbutanoyl]oxypropanoylamino]-3-methylbutanoic acid [IIN-based on: CCMSLIB00000845729]	[M+Na]+	C26H45N3O10	Depsipeptides	YBUWNKPGCLTWJO-UHFFFAOYSA-N	CC(C)C(NC(=O)C(C)OC(=O)C(NC(=O)C(OC(=O)C(NC(=O)C(C)O)C(C)C)C(C)C)C(C)C)C(O)=O	10.136	0.0022474	1.54253
567	Positive	6.156	341.201	low score: isosteviol	[M+Na]+	C20H30O3	Diterpenoids	KFVUFODCZDRVSS-XTUUMGGZSA-N	O=C(O)C1(C)CCCC2(C)C1CCC34CC(=O)C(C)(CCC32)C4	2.9688	0.0022536	1.47822
568	Positive	9.754	636.435	Unknown	[M+H]+	null	null	null	null	5.9646	0.0022536	1.18646
569	Negative	8.653	512.242	Unknown	[M-H]-	null	null	null	null	0.060889	0.0022691	1.41212
570	Positive	13.963	699.57	Unknown	[M+H]+	null	null	null	null	0.20779	0.0022795	1.38261
571	Positive	7.468	341.272	low score: CUDA* (internal standard)	[M+H]+	C19H36N2O3	Medium-chain fatty acids	HPTJABJPZMULFH-UHFFFAOYSA-N	O=C(O)CCCCCCCCCCCN=C(O)NC1CCCCC1	0.487	0.0023065	1.63171
572	Negative	1.126	981.892	Unknown	[M-H]-	null	null	null	null	0.12701	0.0023065	1.27635
573	Positive	16.278	758.633	Unknown	[M+H]+	null	null	null	null	0.26953	0.0023297	1.76849
574	Positive	14.539	810.668	Unknown	[M+H]+	null	null	null	null	0.32926	0.0023297	1.57764
575	Positive	0.624	361.871	Unknown	[M+H]+	null	null	null	null	3.3275	0.0023319	1.4806
576	Positive	0.816	237.944	Unknown	[M+H]+	null	null	null	null	8.0734	0.0023425	1.42752
577	Positive	1.185	453.991	Unknown	[M+H]+	null	null	null	null	11.937	0.0023425	1.36382
578	Negative	1.374	590.183	Unknown	[M-H]-	null	null	null	null	0.015492	0.0023446	1.46533
579	Positive	1.631	613.201	low score: Dihydrohesperetin-7-O-neohesperidoside	[M+H]+	C28H36O15	Flavonoid O-glycosides	ITVGXXMINPYUHD-CUVHLRMHSA-N	COC1=C(O)C=C(CCC(=O)C2=C(O)C=C(O[C@@H]3O[C@H](CO)[C@@H](O)[C@H](O)[C@H]3O[C@@H]3O[C@@H](C)[C@H](O)[C@@H](O)[C@H]3O)C=C2O)C=C1	9.6608	0.0023466	1.37501
580	Negative	1.081	772.091	Unknown	[M-H]-	null	null	null	null	0.38379	0.002348	1.30245
581	Positive	0.328	811.673	Unknown	[M+H]+	null	null	null	null	0.3676	0.0023595	1.37199
582	Negative	1.173	806.042	low score: PFSM-ammonio; [C18H20F21N2O5S2]+	[M-H]-	C18H20F21N2O5S2	Organosulfonic acids and derivatives	XVKCEHFNFVIZKZ-UHFFFAOYSA-O	O=S(=O)(O)CCC[N+](C)(C)CCCNS(=O)(=O)C(F)(F)C(F)(F)C(F)(F)C(F)(F)C(F)(F)C(F)(F)C(F)(F)C(F)(F)C(F)(F)C(F)(F)F	0.03906	0.0023673	1.36273
583	Negative	8.844	572.214	Unknown	[M-H]-	null	null	null	null	0.12594	0.0023924	1.34789
584	Negative	1.264	652.116	Unknown	[M-H]-	null	null	null	null	0.070731	0.0023924	1.32037
585	Positive	0.344	516.475	Unknown	[M+H]+	null	null	null	null	0.31805	0.0023947	1.66387
586	Positive	12.135	526.467	Unknown	[M+H]+	null	null	null	null	4.3571	0.0023947	1.51695
587	Negative	1.252	639.267	low score: NCGC00347400-02_C30H42O12_1,7-Bis(4-hydroxyphenyl)-3-heptanyl 2-O-[(2S,3R,4R)-3,4-dihydroxy-4-(hydroxymethyl)tetrahydro-2-furanyl]-beta-D-glucopyranoside	[M+HCOO]-	C30H42O12	Linear diarylheptanoids	GFFOBQNFESRPJR-JKHMXVTDSA-N	OC[C@H]1O[C@@H](OC(CCCCC2=CC=C(O)C=C2)CCC3=CC=C(O)C=C3)[C@H](O[C@@H]4OC[C@](O)(CO)[C@H]4O)[C@@H](O)[C@@H]1O	0.037537	0.0023947	1.48129
588	Positive	16.088	759.636	Unknown	[M+H]+	null	null	null	null	0.28163	0.0024009	1.7646
589	Positive	15.244	752.652	Unknown	[M+H]+	null	null	null	null	0.35209	0.0024107	1.72867
590	Negative	6.497	500.243	Unknown	[M-H]-	null	null	null	null	0.13698	0.0024124	1.49144
591	Positive	13.346	713.578	Unknown	[M+H]+	null	null	null	null	0.27821	0.0024141	1.43783
592	Negative	1.541	612.226	Unknown	[M-H]-	null	null	null	null	0.030292	0.0024506	1.39352
593	Positive	9.291	496.41	Unknown	[M+H]+	null	null	null	null	0.43462	0.0024593	1.35986
594	Negative	6.753	484.255	Unknown	[M-H]-	null	null	null	null	0.028645	0.0024593	1.33004
595	Negative	1.06	640.195	low score: NCGC00385678-01_C27H33NO14_4,8-Dimethoxyfuro[2,3-b]quinolin-7-yl 2-O-acetyl-6-deoxy-3-O-beta-D-glucopyranosyl-alpha-L-mannopyranoside	[M+HCOO]-	C27H33NO14	Phenolic glycosides	RHOKVADXUJGRSQ-HYUJTPQQSA-N	COC1=C2N=C3OC=CC3=C(OC)C2=CC=C1O[C@@H]4O[C@@H](C)[C@H](O)[C@@H](O[C@@H]5O[C@H](CO)[C@@H](O)[C@H](O)[C@H]5O)[C@H]4OC(C)=O	0.016685	0.0024682	1.29464
596	Positive	7.996	225.195	Dicyclohexylurea	[M+H]+	C13H24N2O	Ureas	ADFXKUOMJKEIND-UHFFFAOYSA-N	C1CCC(CC1)NC(=O)NC2CCCCC2	3.1475	0.0024766	1.28679
597	Positive	1.138	550.781	Unknown	[M+H]+	null	null	null	null	3.6755	0.0024766	1.43268
598	Positive	6.757	574.396	low score: (3S,8S,9S,10R,13R,14S,17R)-10,13-dimethyl-17-((R)-6-methylheptan-2-yl)-2,3,4,7,8,9,10,11,12,13,14,15,16,17-tetradecahydro-1H-cyclopenta[a]phenanthren-3-yl (2-(trimethylammonio)ethyl) phosphate	[M+Na]+	C32H58NO4P	Cholesterols and derivatives	MWEZHNCHKXEIBJ-RWFZIKKDSA-N	O=P([O-])(OCC[N+](C)(C)C)OC1CC2=CCC3C(CCC4(C)C(CCC34)C(C)CCCC(C)C)C2(C)CC1	0.4079	0.002477	1.34703
599	Positive	1.137	634.698	Unknown	[M+H]+	null	null	null	null	5.258	0.0024919	1.53654
600	Positive	9.017	402.382	Unknown	[M+H]+	null	null	null	null	6.0611	0.0024919	1.15806
601	Negative	0.088	153.862	Unknown	[M-H]-	null	null	null	null	0.49128	0.0025014	1.3608
602	Positive	9.037	571.302	no MS2: NCGC00386085-01_C32H44O10_	[M-H2O+H]+	C32H44O10	Oxepanes	MPCIDUFOTGXABA-UHFFFAOYSA-N	CC1OC\23C/4=C(/C(O)C5C(C)(CCC6OC(CC(OC(C)=O)C56C)C(C)(C)O)O4)C(=O)\C=C2C(C)C(OC(C)=O)C13C	12.355	0.0025057	1.37387
603	Positive	8.672	500.316	low score: Taurodeoxycholate	[M+2Na-H]+	C26H45NO6S	Taurinated bile acids and derivatives	AWDRATDZQPNJFN-VAYUFCLWSA-N	C[C@H](CC/C(=N/CCS(=O)(=O)O)/O)[C@H]1CC[C@@H]2[C@@]1([C@H](C[C@H]3[C@H]2CC[C@H]4[C@@]3(CC[C@H](C4)O)C)O)C	0.4333	0.0025057	1.50107
604	Positive	8.322	584.366	Unknown	[M+H]+	null	null	null	null	2.2347	0.0025057	1.18829
605	Positive	14.46	796.681	Unknown	[M+H]+	null	null	null	null	0.35993	0.0025057	1.82238
606	Positive	0.143	806.642	Unknown	[M+H]+	null	null	null	null	0.34456	0.0025057	1.90571
607	Negative	7.479	498.267	low score: Phosphatidylethanolamine lyso 20:5	[M-H]-	C25H42NO7P	2-acyl-sn-glycero-3-phosphoethanolamines	UNILCTDPRMGSDM-JEBPEJKESA-N	CCCC=CCC=CCC=CCC=CCC=CCCC(=O)OC(CO)COP(O)(=O)OCCN	0.056008	0.0025057	1.43456
608	Negative	6.617	599.229	Unknown	[M-H]-	null	null	null	null	0.038623	0.0025057	1.33026
609	Negative	9.168	632.285	Unknown	[M-H]-	null	null	null	null	2.3122	0.0025057	1.23139
610	Negative	7.117	657.297	Unknown	[M-H]-	null	null	null	null	0.41578	0.0025057	1.23365
611	Positive	12.085	263.26	Unknown	[M+H]+	null	null	null	null	0.4099	0.0025157	1.61824
612	Positive	1.067	300.904	Unknown	[M+H]+	null	null	null	null	3.085	0.0025211	1.48309
613	Positive	14.913	808.652	Unknown	[M+H]+	null	null	null	null	0.36608	0.0025211	1.72855
614	Negative	18.405	222.817	Unknown	[M-H]-	null	null	null	null	0.4572	0.0025211	1.24166
615	Negative	1.17	599.234	Unknown	[M-H]-	null	null	null	null	0.012565	0.0025211	1.4165
616	Positive	15.008	297.101	no MS2: OCP_297.1002_16.5	[M+H]+	C14H17ClN2O3	Phenylpiperazines	FMKKWAHJJLLAOW-UHFFFAOYSA-N	OC(=O)CCC(=O)N1CCN(CC1)c1ccccc1Cl	3.1821	0.0025408	1.62463
617	Positive	9.523	325.251	low score: GLYCEROL-MYRISTATE	[M+Na]+	C17H34O4	1-monoacylglycerols	DCBSHORRWZKAKO-UHFFFAOYSA-N	CCCCCCCCCCCCCC(=O)OCC(CO)O	0.38956	0.0025478	1.80181
618	Positive	1.199	244.207	no MS2: Phencyclidine	[M+H]+	C17H25N	Aralkylamines	JTJMJGYZQZDUJJ-UHFFFAOYSA-N	C1CCC(CC1)(C2=CC=CC=C2)N3CCCCC3	0.40179	0.0025478	1.45976
619	Positive	1.724	371.124	no MS2: 1-[2-hydroxy-4-(3-hydroxy-5-methylphenoxy)-6-methylphenyl]-3-methylbutane-2,3-diol	[M+K]+	C19H24O5	Diphenylethers	FLLRZSQAKUHACV-UHFFFAOYSA-N	OC=1C=C(OC2=CC(O)=C(C(=C2)C)CC(O)C(O)(C)C)C=C(C1)C	6.362	0.0025521	1.65395
620	Positive	14.356	772.588	Unknown	[M+H]+	null	null	null	null	4.2147	0.0025521	1.05497
621	Positive	17.335	758.636	Unknown	[M+H]+	null	null	null	null	0.30853	0.0025653	1.76945
622	Positive	1.155	378.923	Unknown	[M+H]+	null	null	null	null	2.7363	0.0025673	1.33518
623	Positive	12.628	800.622	Unknown	[M+H]+	null	null	null	null	4.5588	0.0025726	1.28796
624	Positive	7.059	972.122	low score: 2-[(5S,25R,26R,29S,30S,31S)-13,14,15,18,19,20,31,35,36-nonahydroxy-2,10,23,28,32-pentaoxo-5-(3,4,5-trihydroxybenzoyloxy)-3,6,9,24,27,33-hexaoxaheptacyclo[28.7.1.0?,??.0?,??.0??,??.0??,??.0??,??]octatriaconta-1(38),11(16),12,14,17,19,21,34,36-nonaen-29-yl]acetic acid	[M+NH4]+	C41H30O27	Hydrolyzable tannins	HGJXAVROWQLCTP-YSNZXMJVSA-N	O=C(O)CC1C(=O)OC2C3OC(OC(=O)C4=CC(O)=C(O)C(O)=C4)C(OC(=O)C5=CC(O)=C(O)C=6OC(=O)C(O)C1C65)C2OC(=O)C7=CC(O)=C(O)C(O)=C7C=8C(O)=C(O)C(O)=CC8C(=O)OC3	0.32788	0.0025809	1.73807
625	Negative	1.245	639.292	Unknown	[M-H]-	null	null	null	null	0.047978	0.0025974	1.50294
626	Negative	8.439	991.528	Unknown	[M-H]-	null	null	null	null	0.1175	0.0025974	1.29157
627	Positive	16.346	784.655	Unknown	[M+H]+	null	null	null	null	0.35249	0.0026	1.75747
628	Positive	1.077	371.067	no MS2: asterric acid	[M+Na]+	C17H16O8	Diphenylethers	XOKVHFNTYHPEHN-UHFFFAOYSA-N	O=C(O)C1=C(O)C=C(C=C1OC=2C(OC)=CC(O)=CC2C(=O)OC)C	2.7886	0.0026048	1.18591
629	Positive	14.327	431.117	no MS2: Bispyribac	[M+H]+	C19H18N4O8	Diarylethers	RYVIXQCRCQLFCM-UHFFFAOYSA-N	COC1=CC(OC)=NC(OC2=CC=CC(OC3=NC(OC)=CC(OC)=N3)=C2C(O)=O)=N1	7.9426	0.002615	1.12354
630	Positive	11.849	512.459	Unknown	[M+H]+	null	null	null	null	0.44564	0.0026206	1.6887
631	Positive	8.788	566.369	low score: "1,2-DIDECANOYL-SN-GLYCERO-3-PHOSPHOCHOLINE"	[M+H]+	C28H56NO8P	Phosphatidylcholines	MLKLDGSYMHFAOC-AREMUKBSSA-N	CCCCCCCCCC(=O)OC[C@H](COP(=O)([O-])OCC[N+](C)(C)C)OC(=O)CCCCCCCCC	0.38388	0.0026299	1.76498
632	Positive	14.213	496.466	Unknown	[M+H]+	null	null	null	null	0.42164	0.0026336	1.65395
633	Positive	7.064	875.111	Unknown	[M+H]+	null	null	null	null	0.3331	0.0026611	1.67923
634	Positive	0.702	332.311	Unknown	[M+H]+	null	null	null	null	0.41831	0.0026657	1.62978
635	Positive	8.125	453.21	low score: NCGC00384740-01_C21H34O9_2(1H)-Azulenone, 6-(beta-D-glucopyranosyloxy)-4,5,6,7,8,8a-hexahydro-5-hydroxy-5-(1-hydroxy-1-methylethyl)-3,8-dimethyl-	[M+Na]+	C21H34O9	Terpene glycosides	HVAVGMDRUJHUOH-UURFWDJCSA-N	CC1CC(O[C@@H]2O[C@H](CO)[C@@H](O)[C@H](O)[C@H]2O)C(O)(CC/3=C(C)/C(=O)CC13)C(C)(C)O	0.28384	0.0026657	1.5835
636	Negative	1.073	160.991	Unknown	[M-H]-	null	null	null	null	0.47977	0.0026657	1.27198
637	Positive	13.698	682.421	low score: 11-hydroxy-9-(hydroxymethyl)-2-methoxycarbonyl-2,6a,6b,9,12a-pentamethyl-10-(3,4,5-trihydroxyoxan-2-yl)oxy-1,3,4,5,6,6a,7,8,8a,10,11,12,13,14b-tetradecahydropicene-4a-carboxylic acid	[M+NH4]+	C36H56O11	Triterpenoids	SFZVDNKTWPZIJG-UHFFFAOYSA-N	O=C(O)C12CCC(C(=O)OC)(C)CC2C3=CCC4C5(C)CC(O)C(OC6OCC(O)C(O)C6O)C(C)(CO)C5CCC4(C)C3(C)CC1	0.33295	0.0026712	1.73158
638	Positive	6.209	385.235	low score: Bufogenin	[M+H]+	C24H32O4	Bufanolides and derivatives	ATLJNLYIJOCWJE-CWMZOUAVSA-N	O=C1OC=C(C=C1)C2CC3OC34C5CCC6CC(O)CCC6(C)C5CCC24C	3.9649	0.0026765	1.4268
639	Positive	6.571	590.393	low score: Unknown (carbon number 34); PlaSMA ID-2964	[M+ACN+Na]+	C34H55NO7	Unknown	null	null	0.45711	0.0026868	1.41884
640	Negative	9.2	614.183	Unknown	[M-H]-	null	null	null	null	0.11473	0.0026926	1.42529
641	Positive	8.677	478.335	low score: N-(4-((6aR,8aS)-4-hydroxy-6a,8a,9-trimethyl-3,4,5,6,6a,6b,7,8,8a,8b,11a,12,12a,12b-tetradecahydro-1H-naphtho[2',1':4,5]indeno[2,1-b]furan-10-yl)-2-methylbutyl)acetamide	[M+Na]+	C29H45NO3	Furostanes and derivatives	CNHACNVJEKRLHF-UDCIVARJSA-N	O=C(NCC(C)CCC=1OC2CC3C4CC=C5CC(O)CCC5(C)C4CCC3(C)C2C1C)C	0.36256	0.0026988	1.42643
642	Negative	9.999	512.245	Unknown	[M-H]-	null	null	null	null	0.062101	0.0026988	1.37683
643	Positive	10.106	634.416	Unknown	[M+H]+	null	null	null	null	6.905	0.0026998	1.28793
644	Negative	7.04	498.262	low score: Phosphatidylethanolamine lyso 20:5	[M-H]-	C25H42NO7P	2-acyl-sn-glycero-3-phosphoethanolamines	UNILCTDPRMGSDM-JEBPEJKESA-N	CCCC=CCC=CCC=CCC=CCC=CCCC(=O)OC(CO)COP(O)(=O)OCCN	0.048743	0.0026998	1.41826
645	Negative	1.276	650.116	Unknown	[M-H]-	null	null	null	null	0.040198	0.0026998	1.41955
646	Negative	6.724	677.095	Unknown	[M-H]-	null	null	null	null	0.075232	0.0026998	1.45563
647	Positive	13.528	772.603	Unknown	[M+H]+	null	null	null	null	4.1203	0.0027002	1.28928
648	Positive	10.338	400.379	Unknown	[M+H]+	null	null	null	null	0.31584	0.0027013	1.51579
649	Positive	10.569	646.453	Unknown	[M+H]+	null	null	null	null	11.87	0.0027048	1.14655
650	Positive	12.879	784.652	Unknown	[M+H]+	null	null	null	null	0.43107	0.0027048	1.41728
651	Positive	9.28	496.429	Unknown	[M+H]+	null	null	null	null	0.45959	0.0027075	1.42533
652	Positive	8.541	346.364	Unknown	[M+H]+	null	null	null	null	0.34827	0.0027125	1.48862
653	Positive	1.142	494.808	Unknown	[M+H]+	null	null	null	null	10.532	0.0027165	1.45151
654	Negative	1.277	622.139	Unknown	[M-H]-	null	null	null	null	0.02973	0.0027165	1.45289
655	Negative	1.578	634.209	Unknown	[M-H]-	null	null	null	null	0.026606	0.0027165	1.33141
656	Positive	13.478	655.545	Unknown	[M+H]+	null	null	null	null	0.288	0.0027256	1.3282
657	Negative	7.827	512.245	Unknown	[M-H]-	null	null	null	null	0.071087	0.0027437	1.39709
658	Negative	1.168	704.105	Unknown	[M-H]-	null	null	null	null	0.10916	0.002745	1.22633
659	Positive	13.34	367.279	no MS2: Kalkitoxin	[M+H]+	C21H38N2OS	N-acyl amines	PHYRFZDJEDWWKT-UJWQCDCRSA-N	CC[C@@H](C)C(=O)N(C)CC[C@@H](C)C[C@H](C)[C@H](C)CC1=N[C@@H](CS1)C=C	0.3907	0.0027592	1.40651
660	Negative	1.238	570.202	Unknown	[M-H]-	null	null	null	null	0.027052	0.0027605	1.44815
661	Positive	10.862	546.4	Unknown	[M+H]+	null	null	null	null	0.38843	0.0027687	1.70183
662	Positive	15.296	580.483	Unknown	[M+H]+	null	null	null	null	0.34083	0.0027783	1.56265
663	Positive	9.899	606.418	Unknown	[M+H]+	null	null	null	null	37.418	0.0027859	1.5082
664	Positive	12.249	399.335	Unknown	[M+H]+	null	null	null	null	6.5443	0.002794	1.55454
665	Positive	14.276	452.435	Unknown	[M+H]+	null	null	null	null	0.43274	0.0028162	1.63688
666	Positive	6.319	307.196	low score: NCGC00169827-03!(2E,4E)-12-hydroxy-13-(hydroxymethyl)-3,5,7-trimethyltetradeca-2,4-dienedioic acid [IIN-based on: CCMSLIB00000847643]	[M-2H2O+H]+	C18H30O6	Long-chain fatty acids	QFZISQBFEIXWDM-UTLPMFLDSA-N	CC(CCCCC(O)C(CO)C(O)=O)C\\C(C)=C\\C(C)=C\\C(O)=O	2.5869	0.0028162	1.22372
667	Positive	14.139	540.494	Unknown	[M+H]+	null	null	null	null	0.42952	0.0028198	1.78276
668	Positive	15.318	668.661	Unknown	[M+H]+	null	null	null	null	3.813	0.0028229	1.31786
669	Negative	1.612	613.224	Unknown	[M-H]-	null	null	null	null	0.026516	0.002829	1.28905
670	Positive	10.865	850.602	Unknown	[M+H]+	null	null	null	null	0.36274	0.0028377	1.69171
671	Negative	6.601	377.177	low score: Unknown (carbon number 16); PlaSMA ID-931	[M-H]-	C16H30N2O6S	Unknown	null	null	0.34228	0.0028424	1.40772
672	Positive	8.875	610.415	low score: Emericellamide A	[M+H]+	C31H55N5O7	Cyclic depsipeptides	QURRTAYEASAREY-OOVPVTRWSA-N	CCCCCC[C@H](C)[C@H]1OC(=O)[C@H](C)NC(=O)[C@H](C)NC(=O)[C@H](CC(C)C)NC(=O)[C@@H](NC(=O)CNC(=O)[C@@H]1C)C(C)C	8.964	0.0028545	1.4101
673	Positive	0.267	758.636	Unknown	[M+H]+	null	null	null	null	0.3543	0.0028545	1.80786
674	Positive	16.819	692.627	Unknown	[M+H]+	null	null	null	null	0.36803	0.0028594	1.60219
675	Positive	0.669	300.888	Unknown	[M+H]+	null	null	null	null	2.8209	0.0028594	1.38932
676	Positive	0.262	782.634	Unknown	[M+H]+	null	null	null	null	0.36345	0.0028619	1.7255
677	Positive	6.022	239.166	low score: OMEGA-HYDROXYDODECANOATE	[M+Na]+	C12H24O3	Medium-chain hydroxy acids and derivatives	ZDHCZVWCTKTBRY-UHFFFAOYSA-N	OCCCCCCCCCCCC(O)=O	2.0814	0.0028735	1.69355
678	Negative	1.167	863.99	Unknown	[M-H]-	null	null	null	null	0.047407	0.0028735	1.25787
679	Positive	9.078	436.381	Unknown	[M+H]+	null	null	null	null	0.40894	0.0028804	1.74556
680	Positive	7.104	970.34	low score: NCGC00385068-01!methyl 4-methoxy-2-[(2S,3R,4S,5S,6R)-3,4,5-trihydroxy-6-[[(2S,3R,4S,5R)-3,4,5-trihydroxyoxan-2-yl]oxymethyl]oxan-2-yl]oxybenzoate [IIN-based on: CCMSLIB00000848774]	[2M+NH4]+	C20H28O13	Phenolic glycosides	DZRVGBRAMLSZDQ-HSMQXHTESA-N	COC(=O)C1=CC=C(OC)C=C1O[C@@H]2O[C@H](CO[C@@H]3OC[C@@H](O)[C@H](O)[C@H]3O)[C@@H](O)[C@H](O)[C@H]2O	0.34145	0.0028894	1.71051
681	Negative	8.853	512.239	Unknown	[M-H]-	null	null	null	null	0.11329	0.0028907	1.355
682	Negative	6.578	572.213	Unknown	[M-H]-	null	null	null	null	0.034166	0.0029309	1.33721
683	Negative	7.455	660.135	Unknown	[M-H]-	null	null	null	null	0.19433	0.0029309	1.49887
684	Positive	11.154	672.474	Unknown	[M+H]+	null	null	null	null	4.9184	0.0029357	1.00463
685	Negative	8.03	512.65	Unknown	[M-H]-	null	null	null	null	0.073551	0.0029357	1.34567
686	Positive	8.843	310.265	low score: Bentyl	[M+Na]+	C19H35NO2	Carboxylic acid esters	CURUTKGFNZGFSE-UHFFFAOYSA-N	CCN(CC)CCOC(=O)C1(CCCCC1)C2CCCCC2	0.37577	0.0029427	1.46019
687	Positive	9.575	580.402	Unknown	[M+H]+	null	null	null	null	69.032	0.0029449	1.59502
688	Positive	14.064	698.561	Unknown	[M+H]+	null	null	null	null	0.27162	0.0029623	1.55068
689	Negative	1.184	688.125	Unknown	[M-H]-	null	null	null	null	0.021733	0.0029693	1.39532
690	Positive	0.178	398.27	no MS2: Phytosphingosine-1-P	[M+H]+	C18H40NO6P	Phosphosphingolipids	AYGOSKULTISFCW-KZNAEPCWSA-N	CCCCCCCCCCCCCC[C@H]([C@@H]([C@@H](COP(=O)(O)O)N)O)O	0.37892	0.0029763	1.61374
691	Positive	11.339	429.349	low score: (1S,2R,5R,6R,10R,13S,15S)-5-[(2R,3E,5R)-5,6-dimethylhept-3-en-2-yl]-6,10-dimethyl-16,17-dioxapentacyclo[13.2.2.0?,?.0?,?.0??,??]nonadec-18-en-13-ol	[M+H]+	C28H44O3	Ergostane steroids	VXOZCESVZIRHCJ-LNSUSAKYSA-N	OC1CCC2(C)C3CCC4(C)C(CCC4C53OOC2(C=C5)C1)C(C=CC(C)C(C)C)C	10.23	0.0029763	1.48649
692	Negative	10.563	512.242	Unknown	[M-H]-	null	null	null	null	0.068055	0.0030067	1.35676
693	Negative	0.386	582.242	Unknown	[M-H]-	null	null	null	null	0.1108	0.0030067	1.35221
694	Positive	15.356	557.46	low score: (4R)-5',6a,8a,9-tetramethyldocosahydrospiro[naphtho[2',1':4,5]indeno[2,1-b]furan-10,2'-pyran]-4-yl nonanoate	[M+H]+	C36H60O4	Triterpenoids	BVMVRPVYRJQROP-XYUNULTHSA-N	O=C(OC1CCC2(C)C(CCC3C2CCC4(C)C3CC5OC6(OCC(C)CC6)C(C)C54)C1)CCCCCCCC	0.34928	0.0030194	1.55972
695	Positive	1.112	247.22	Unknown	[M+H]+	null	null	null	null	2.3988	0.0030194	1.20722
696	Negative	1.058	766.145	Unknown	[M-H]-	null	null	null	null	0.21382	0.0030194	1.15993
697	Positive	9.543	668.461	low score: Enniatin A1	[M+H]+	C35H61N3O9	Cyclic depsipeptides	OWUREPXBPJFMOK-CIRFPNLUSA-N	CC[C@H](C)[C@H]1C(=O)O[C@@H](C(=O)N([C@H](C(=O)O[C@@H](C(=O)N([C@H](C(=O)O[C@@H](C(=O)N1C)C(C)C)[C@@H](C)CC)C)C(C)C)C(C)C)C)C(C)C	4.0104	0.0030372	1.21805
698	Positive	10.178	488.402	low score: Tricaprylin (C8:0)	[M+NH4]+	C27H50O6	Triacylglycerols	VLPFTAMPNXLGLX-UHFFFAOYSA-N	CCCCCCCC(=O)OCC(COC(=O)CCCCCCC)OC(=O)CCCCCCC	0.34895	0.0030463	1.4832
699	Positive	10.082	576.464	no MS2: Ceramide (d18:1/16:0)	[M+K]+	C34H67NO3	Ceramides	YDNKGFDKKRUKPY-TURZORIXSA-N	CCCCCCCCCCCCCCCC(=O)N[C@@H](CO)[C@@H](/C=C/CCCCCCCCCCCCC)O	0.34529	0.0030678	1.42417
700	Positive	13.952	285.298	low score: N-[3-(Dimethylamino)propyl]dodecanamide	[M+H]+	C17H36N2O	N-acyl amines	TWMFGCHRALXDAR-UHFFFAOYSA-N	CCCCCCCCCCCC(=O)NCCCN(C)C	4.0029	0.0030734	1.45857
701	Positive	9.071	748.497	low score: Clarithromycin	[M+H]+	C38H69NO13	Aminoglycosides	AGOYDEPGAOXOCK-AVDMLEEESA-N	CC[C@H]1OC(=O)[C@H](C)[C@@H](OC2CC(C)(OC)C(O)C(C)O2)[C@H](C)[C@@H](OC3OC(C)CC(C3O)N(C)C)[C@@](C)(C[C@@H](C)C(=O)[C@H](C)[C@@H](O)[C@]1(C)O)OC	14.061	0.0031189	1.29681
702	Positive	8.49	502.314	no MS2: Serine conjugated chenodeoxycholic acid	[M+Na]+	C27H45NO6	Glycinated bile acids and derivatives	MIGXYHMLYVAUQT-DYUDRYMLSA-N	C[C@H](CCC(N[C@@H](CO)C(O)=O)=O)[C@H]1CC[C@@]2([H])[C@]3([H])[C@H](O)C[C@]4([H])C[C@H](O)CC[C@]4(C)[C@H]3CC[C@@]21C	25.241	0.0031382	1.38292
703	Negative	7.441	650.109	Unknown	[M-H]-	null	null	null	null	0.24774	0.0031382	1.64047
704	Negative	1.303	612.174	Unknown	[M-H]-	null	null	null	null	0.064164	0.0031399	1.48856
705	Negative	0.321	498.264	low score: Phosphatidylethanolamine lyso 20:5	[M-H]-	C25H42NO7P	2-acyl-sn-glycero-3-phosphoethanolamines	UNILCTDPRMGSDM-JEBPEJKESA-N	CCCC=CCC=CCC=CCC=CCC=CCCC(=O)OC(CO)COP(O)(=O)OCCN	0.18894	0.0031493	1.49226
706	Negative	1.176	750.075	Unknown	[M-H]-	null	null	null	null	0.055355	0.0031954	1.30938
707	Positive	8.31	318.307	low score: Phytosphingosine (not validated, isomer of 1696)	[M+H]+	C18H39NO3	1,3-aminoalcohols	AERBNCYCJBRYDG-UHFFFAOYSA-N	OCC(N)C(O)C(O)CCCCCCCCCCCCCC	0.38339	0.0031963	1.70541
708	Positive	10.218	590.434	Unknown	[M+H]+	null	null	null	null	0.36288	0.0031963	1.60149
709	Negative	8.456	844.485	Unknown	[M-H]-	null	null	null	null	0.27663	0.0032196	1.41534
710	Negative	1.267	500.246	Unknown	[M-H]-	null	null	null	null	0.031965	0.0032385	1.41636
711	Positive	11.753	380.383	Unknown	[M+H]+	null	null	null	null	0.34841	0.0032545	1.68017
712	Positive	9.104	325.252	low score: allo-Protolichesterinic acid	[M+H]+	C19H32O4	Gamma butyrolactones	WZYZDHVPSZCEEP-IRXDYDNUSA-N	CCCCCCCCCCCCC[C@@H]1OC(=O)C(=C)[C@@H]1C(=O)O	0.39626	0.0032577	1.68744
713	Negative	6.828	512.244	Unknown	[M-H]-	null	null	null	null	0.035818	0.0032582	1.41585
714	Positive	5.665	281.07	no MS2: Yangonin	[M+Na]+	C15H14O4	Kavalactones	XLHIYUYCSMZCCC-VMPITWQZSA-N	O=C1OC(C=CC2=CC=C(OC)C=C2)=CC(OC)=C1	2.8394	0.0032604	1.70188
715	Positive	8.925	426.388	low score: N-Octanoylsphingosine,D-erythro	[M+H]+	C26H51NO3	Ceramides	APDLCSPGWPLYEQ-WRBRXSDHSA-N	CCCCCCCCCCCCCC=CC(C(CO)NC(=O)CCCCCCC)O	5.415	0.0032865	1.66415
716	Positive	0.473	297.083	low score: 2-methoxy-5-methyl-3-(2-methylbut-3-en-2-yl)chromen-4-one	[M+K]+	C16H18O3	2-methoxychromones	WAPMVTHIMHEOAB-UHFFFAOYSA-N	O=C1C=2C(OC(OC)=C1C(C=C)(C)C)=CC=CC2C	3.5734	0.0032924	1.25935
717	Positive	8.754	295.225	no MS2: Trimipramine	[M+H]+	C20H26N2	Dibenzazepines	ZSCDBOWYZJWBIY-UHFFFAOYSA-N	C=1C=CC2=C(C1)N(C=3C=CC=CC3CC2)CC(C)CN(C)C	0.47545	0.0032947	1.42636
718	Negative	1.279	514.258	low score: 2-[(3R,8aS)-3,4'-dihydroxy-4,4,7,8a-tetramethyl-6'-oxospiro[2,3,4a,5,6,7-hexahydro-1H-naphthalene-8,2'-3,8-dihydrofuro[2,3-e]isoindole]-7'-yl]pentanedioic acid	[M-H]-	C28H37NO8	Glutamic acid and derivatives	QZGOQORSUIQVIR-UIXQMLBBSA-N	O=C(O)CCC(C(=O)O)N1C(=O)C2=CC(O)=C3C(OC4(C3)C(C)CCC5C(C)(C)C(O)CCC54C)=C2C1	0.021686	0.0033046	1.50154
719	Negative	0.414	530.253	Unknown	[M-H]-	null	null	null	null	0.11458	0.0033234	1.18723
720	Negative	1.242	590.198	Unknown	[M-H]-	null	null	null	null	0.033608	0.003337	1.42981
721	Negative	1.265	514.32	Unknown	[M-H]-	null	null	null	null	0.039914	0.0033385	1.29703
722	Negative	1.05	582.242	Unknown	[M-H]-	null	null	null	null	0.0078363	0.003347	1.34458
723	Positive	11.296	704.498	Unknown	[M+H]+	null	null	null	null	22.506	0.0033523	1.21171
724	Positive	12.547	552.438	Unknown	[M+H]+	null	null	null	null	3.1103	0.0033757	0.983128
725	Positive	9.313	296.248	Unknown	[M+H]+	null	null	null	null	0.41174	0.0033993	1.55991
726	Positive	6.301	460.306	Unknown	[M+H]+	null	null	null	null	2.9153	0.0033993	1.29332
727	Positive	9.06	398.274	low score: Phytosphingosine-1-P	[M+H]+	C18H40NO6P	Phosphosphingolipids	AYGOSKULTISFCW-KZNAEPCWSA-N	CCCCCCCCCCCCCC[C@H]([C@@H]([C@@H](COP(=O)(O)O)N)O)O	0.46267	0.0033993	1.2192
728	Positive	6.116	811.33	low score: (8Z,8'Z)-8,8'-bis(((2,5-dimethoxyphenyl)amino)methylene)-1,1',6,6'-tetrahydroxy-5,5'-diisopropyl-3,3'-dimethyl-[2,2'-binaphthalene]-7,7'(8H,8'H)-dione	[M+Na]+	C46H48N2O10	Lignans, neolignans and related compounds	JKUFNLRZNPQIOW-NAZWXXJZSA-N	O=C1C(O)=C(C=2C=C(C(=C(O)C2C1=CNC3=CC(OC)=CC=C3OC)C=4C(O)=C5C(=CNC6=CC(OC)=CC=C6OC)C(=O)C(O)=C(C5=CC4C)C(C)C)C)C(C)C	8.8761	0.0033993	1.55784
729	Negative	6.986	530.251	Unknown	[M-H]-	null	null	null	null	0.065393	0.0033993	1.31103
730	Positive	11.971	523.295	low score: 5,15-Diacetyl-3-benzoyllathyrol	[M+H]+	C31H38O7	Diterpenoids	JPYYWXPAHJBKJX-PTKUAVCHSA-N	O=C(OC1C(C)CC2(OC(=O)C)C(=O)C(=CC3C(CCC(=C)C(OC(=O)C)C12)C3(C)C)C)C=4C=CC=CC4	0.3092	0.0034027	1.46334
731	Negative	8.818	514.279	low score: Taurocholate	[M-H]-	C26H45NO7S	Trihydroxy bile acids, alcohols and derivatives	WBWWGRHZICKQGZ-HZAMXZRMSA-N	[C@H](C1)(O)CC[C@]([C@H]24)(C)[C@@H]1C[C@H]([C@H]2[C@@H]([C@@](C)([C@H](C4)O)3)CC[C@H]([C@H](C)CCC(=O)NCCS(O)(=O)=O)3)O	0.10146	0.0034027	1.31277
732	Positive	8.764	520.388	Unknown	[M+H]+	null	null	null	null	0.40011	0.0034125	1.7301
733	Negative	7.183	496.251	Unknown	[M-H]-	null	null	null	null	0.051266	0.0034125	1.31987
734	Positive	7.243	517.377	low score: NCGC00380806-01!6-(diaminomethylideneamino)-2-[[(4E,6E,12E,14E)-3-hydroxy-2-(hydroxymethyl)-8,10,16-trimethyloctadeca-4,6,12,14-tetraenoyl]amino]hexanoic acid [IIN-based on: CCMSLIB00000847271]	[M-H2O+H]+	C29H50N4O5	N-acyl-alpha amino acids	QOXHBQOXXZSKON-MBGQFZTNSA-N	CCC(C)\\C=C\\C=C\\CC(C)CC(C)\\C=C\\C=C\\C(O)C(CO)C(=O)NC(CCCCNC(N)=N)C(O)=O	0.084188	0.0034134	1.29713
735	Negative	1.299	498.264	low score: Phosphatidylethanolamine lyso 20:5	[M-H]-	C25H42NO7P	2-acyl-sn-glycero-3-phosphoethanolamines	UNILCTDPRMGSDM-JEBPEJKESA-N	CCCC=CCC=CCC=CCC=CCC=CCCC(=O)OC(CO)COP(O)(=O)OCCN	0.031466	0.0034194	1.39116
736	Negative	1.162	766.053	Unknown	[M-H]-	null	null	null	null	0.1469	0.0034559	1.15955
737	Positive	19.828	441.339	low score: NCGC00169592-02_C29H46O4_3aH-Cyclopenta[a]chrysene-3a-carboxylic acid, 1-acetyleicosahydro-9-hydroxy-5a,5b,8,8,11a-pentamethyl-, (1R,3aS,5aR,5bR,9S,11aR)-	[M-H2O+H]+	C29H46O4	Oxosteroids	RVMPLOSJMIQORE-XPDAHERZSA-N	CC(=O)[C@@H]1CC[C@@]2(CC[C@]3(C)C(CCC4[C@@]5(C)CC[C@H](O)C(C)(C)C5CC[C@@]34C)C12)C(O)=O	0.38344	0.0034585	1.80613
738	Positive	9.272	546.404	Unknown	[M+H]+	null	null	null	null	0.41198	0.0034763	1.7291
739	Positive	13.475	674.522	Unknown	[M+H]+	null	null	null	null	0.3429	0.0034832	1.48292
740	Positive	10.006	664.518	Unknown	[M+H]+	null	null	null	null	0.32311	0.0034832	1.35735
741	Positive	17.145	585.325	low score: lappaconitine	[M+H]+	C32H44N2O8	Lappaconitine-type diterpenoid alkaloids	NWBWCXBPKTTZNQ-GSAAXPBRSA-N	O=C(OC12CN(CC)C3C4CC1C3(C(OC)CC2)C5CC6C(OC)CC4(O)C5(O)C6OC)C=7C=CC=CC7NC(=O)C	0.3182	0.0034835	1.64791
742	Positive	6.954	583.389	low score: Diacetylpyxinol	[M+Na]+	C34H56O6	Triterpene saponins	TWRWTOXPYGQKPW-ZWXXETMRSA-N	CC1(C2C(CCC1OC(=O)C)(C)C1C(CC2)([C@]2(C(C(C1)O)C(CC2)[C@]1(C)O[C@@H](C(C)(OC(=O)C)C)CC1)C)C)C	0.03443	0.0034941	1.3205
743	Positive	1.104	206.893	Unknown	[M+H]+	null	null	null	null	4.5372	0.0035566	1.46021
744	Positive	9.528	324.246	low score: Melophlin B/C/G/K/L/N/O	[M+H]+	C19H33NO3	N-alkylpyrrolidines	WBPPODSRZVXVJK-MSUUIHNZSA-N	CCCCCCCCCCCC/C(O)=C(C1=O)\C(C(N1C)C)=O	0.40326	0.0035566	1.75019
745	Positive	13.417	421.284	low score: Cholest-4,6-Dien-3-One	[M+K]+	C27H42O	Cholesterols and derivatives	XIWMRKFKSRYSIJ-GYKMGIIDSA-N	O=C1C=C2C=CC3C(CCC4(C)C3CCC4C(C)CCCC(C)C)C2(C)CC1	0.42759	0.0035566	1.7082
746	Positive	10.858	522.797	Unknown	[M+H]+	null	null	null	null	0.39364	0.0035566	1.58691
747	Positive	14.06	670.527	Unknown	[M+H]+	null	null	null	null	0.3048	0.0035566	1.55562
748	Positive	1.228	246.266	Unknown	[M+H]+	null	null	null	null	0.38942	0.0035566	1.2506
749	Positive	9.15	352.32	Unknown	[M+H]+	null	null	null	null	0.39609	0.0035566	1.24504
750	Positive	11.5	650.485	low score: phosphatidylethanolamine (14:0/15:0)	[M+H]+	C34H68NO8P	Phosphatidylethanolamines	VQQFJLCUEFKGHJ-JGCGQSQUSA-N	[H][C@@](COC(=O)CCCCCCCCCCCCC)(COP(O)(=O)OCCN)OC(=O)CCCCCCCCCCCCCC	20.812	0.0035566	1.43255
751	Positive	7.101	970.784	Unknown	[M+H]+	null	null	null	null	0.37288	0.0035566	1.71159
752	Negative	7.661	533.279	low score: 9-hydroxy-9-[[(E)-2-(hydroxymethyl)-3-[3-(hydroxymethyl)-6-propan-2-ylcyclohex-2-en-1-yl]prop-2-enoyl]oxymethyl]-1-oxo-6-propan-2-yl-3,5a,6,7,8,9a-hexahydro-2-benzoxepine-4-carboxylic acid	[M-H]-	C29H42O9	Terpene lactones	RCOCBDNPQGVEDL-KEBDBYFISA-N	O=C(O)C1=CC2C(C(=O)OC1)C(O)(COC(=O)C(=CC3C=C(CO)CCC3C(C)C)CO)CCC2C(C)C	0.15443	0.0035566	1.24666
753	Positive	8.774	542.686	Unknown	[M+H]+	null	null	null	null	0.38366	0.0035601	1.46864
754	Positive	6.626	312.194	low score: Dienogest	[M+H]+	C20H25NO2	Oxosteroids	AZFLJNIPTRTECV-FUMNGEBKSA-N	C[C@]12CCC3=C4CCC(=O)C=C4CC[C@H]3[C@@H]1CC[C@]2(CC#N)O	0.49396	0.0035701	1.57937
755	Positive	0.428	300.899	Unknown	[M+H]+	null	null	null	null	2.969	0.0035758	1.33295
756	Positive	10.112	524.37	LysoPC(0:0/18:0)	[M+H]+	C26H54NO7P	2-acyl-sn-glycero-3-phosphocholines	IQGPMZRCLCCXAG-RUZDIDTESA-N	CCCCCCCCCCCCCCCCCC(=O)O[C@H](CO)COP(=O)([O-])OCC[N+](C)(C)C	3.5058	0.0035778	1.2523
757	Positive	18.822	721.566	Unknown	[M+H]+	null	null	null	null	0.43582	0.003591	1.4957
758	Positive	9.02	572.304	Unknown	[M+H]+	null	null	null	null	14.859	0.0036063	1.58135
759	Negative	1.126	877.969	Unknown	[M-H]-	null	null	null	null	0.22771	0.0036114	1.06277
760	Negative	1.276	649.146	low score: C29H30O17; PlaSMA ID-1787	[M-H]-	C29H30O17	Formula predicted	null	null	0.05655	0.0036119	1.26069
761	Positive	0.672	284.068	no MS2: Pesticide6_Penconazole_C13H15Cl2N3_1H-1,2,4-Triazole, 1-[2-(2,4-dichlorophenyl)pentyl]-	[M+H]+	C13H15Cl2N3	Dichlorobenzenes	WKBPZYKAUNRMKP-UHFFFAOYSA-N	CCCC(CN1C=NC=N1)C2=C(C=C(C=C2)Cl)Cl	2.8672	0.0036236	1.43603
762	Negative	7.626	501.272	Unknown	[M-H]-	null	null	null	null	0.13079	0.0036236	1.22174
763	Negative	1.144	919.952	no MS2: PFSM-carboxylic_acid; C18H6F31NO4S	[M-H]-	C18H6F31NO4S	Perfluoroalkane sulfonamidoacetals	RYVCEXFTPGIZMK-UHFFFAOYSA-N	O=C(O)CN(C)S(=O)(=O)C(F)(F)C(F)(F)C(F)(F)C(F)(F)C(F)(F)C(F)(F)C(F)(F)C(F)(F)C(F)(F)C(F)(F)C(F)(F)C(F)(F)C(F)(F)C(F)(F)C(F)(F)F	0.1554	0.0036236	1.2056
764	Positive	14.538	828.627	Unknown	[M+H]+	null	null	null	null	0.41927	0.0036399	1.4045
765	Positive	1.647	297.083	low score: Flunixine	[M+H]+	C14H11F3N2O2	Trifluoromethylbenzenes	NOOCSNJCXJYGPE-UHFFFAOYSA-N	CC1=C(C=CC=C1NC2=C(C=CC=N2)C(=O)O)C(F)(F)F	3.1753	0.0036665	1.4615
766	Positive	15.519	734.714	Unknown	[M+H]+	null	null	null	null	0.33159	0.0036665	1.26077
767	Negative	1.218	637.249	Unknown	[M-H]-	null	null	null	null	0.031833	0.0036665	1.41667
768	Positive	18.638	701.618	Unknown	[M+H]+	null	null	null	null	0.39388	0.0036834	1.64364
769	Negative	1.185	692.126	Unknown	[M-H]-	null	null	null	null	0.042597	0.0037076	1.30611
770	Positive	6.413	430.293	low score: PF-1052_130138	[M+H]+	C26H39NO4	N-alkylpyrrolidines	NPWKEUKXVOMELT-LNVKXUELSA-N	O=C(N(C)C(C(C)CC)C/1=O)C1=C(O)\C2C(C(O3)(C)C3C)C=CC4CC(C)CC(C)C42	2.8207	0.0037185	1.43764
771	Positive	9.244	582.417	Unknown	[M+H]+	null	null	null	null	5.4186	0.0037444	1.27411
772	Positive	13.79	379.315	low score: conessine	[M+Na]+	C24H40N2	Conanine-type alkaloids	GPLGAQQQNWMVMM-CYFNKAHPSA-N	C1=C2CC(N(C)C)CCC2(C)C3CCC45CN(C)C(C)C5CCC4C3C1	0.33763	0.0037647	1.71553
773	Negative	7.24	547.264	no MS2: Animicin A	[M-H]-	C28H40N2O9	N-acyl-alpha amino acids and derivatives	UIFFUZWRFRDZJC-UHFFFAOYSA-N	CCCCCCC1C(C(OC(=O)C(C(OC1=O)C)NC(=O)C2=C(C(=CC=C2)NC=O)O)C)OC(=O)CC(C)C	0.13074	0.0037647	1.39062
774	Positive	7.277	274.299	Unknown	[M+H]+	null	null	null	null	0.37194	0.0037663	1.88922
775	Positive	0.428	159.973	Unknown	[M+H]+	null	null	null	null	6.3352	0.0037663	1.23378
776	Positive	6.409	996.691	Unknown	[M+H]+	null	null	null	null	0.39592	0.0037663	1.59787
777	Positive	14.45	297.104	low score: OCP_297.1002_16.5	[M+H]+	C14H17ClN2O3	Phenylpiperazines	FMKKWAHJJLLAOW-UHFFFAOYSA-N	OC(=O)CCC(=O)N1CCN(CC1)c1ccccc1Cl	2.0878	0.0037847	1.6672
778	Positive	1.682	297.103	low score: 2-(2,3-dihydrobenzo[b][1,4]dioxin-6-yl)-6-methylchroman-4-one	[M+H]+	C18H16O4	Flavonolignans	FVNYMYXXKXAQHS-UHFFFAOYSA-N	O=C1C2=CC(=CC=C2OC(C3=CC=C4OCCOC4=C3)C1)C	2.614	0.0038051	1.76481
779	Positive	1.041	385.065	no MS2: methyl 2-(2,6-dihydroxy-4-methylbenzoyl)-3,5-dimethoxybenzoate	[M+K]+	C18H18O7	Benzophenones	YLCJNMGKCHGJRF-UHFFFAOYSA-N	O=C(OC)C=1C=C(OC)C=C(OC)C1C(=O)C2=C(O)C=C(C=C2O)C	2.1361	0.0038269	1.12044
780	Positive	9.248	496.297	no MS2: NCGC00381066-01_C26H38O8_1H-Naphtho[1,2-c]pyran-7-propanoic acid, dodecahydro-8-(1-hydroxy-1-methylethyl)-3-(methoxycarbonyl)-3,4a,7,10a-tetramethyl-5-methylene-1,4-dioxo-	[M+NH4]+	C26H38O8	Steroid acids	JNZBACSLMIGXCA-UHFFFAOYSA-N	COC(=O)C1(C)OC(=O)C2C3(C)CCC(C(C)(C)O)C(C)(CCC(O)=O)C3CC(=C)C2(C)C1=O	0.38475	0.003828	1.44592
781	Positive	9.663	612.381	low score: NCGC00384824-01!methyl 3-hydroxy-2-[[3-hydroxy-2-[[2-[(3-hydroxy-2,4-dimethyltetradecanoyl)amino]-3-methylbutanoyl]amino]butanoyl]amino]propanoate [IIN-based on: CCMSLIB00000848076]	[M+K]+	C29H55N3O8	Peptides	AKMKWHBDPUOPSK-UHFFFAOYSA-N	CCCCCCCCCCC(C)C(O)C(C)C(=O)NC(C(C)C)C(=O)NC(C(C)O)C(=O)NC(CO)C(=O)OC	0.37732	0.0038482	1.64222
782	Positive	17.623	518.5	Unknown	[M+H]+	null	null	null	null	0.36467	0.0038484	1.76579
783	Positive	13.763	534.503	Unknown	[M+H]+	null	null	null	null	0.29048	0.0038573	1.41033
784	Positive	15.355	298.103	low score: ACTIPHENOL	[M+Na]+	C15H17NO4	Alkyl-phenylketones	YTLMIHBTPWTPEV-UHFFFAOYSA-N	O=C1N=C(O)CC(C1)CC(=O)C=2C=C(C=C(C2O)C)C	2.5883	0.0038893	1.74134
785	Positive	15.522	449.325	low score: "(6R)-3-hydroxy-2-methyl-6-((3R,5S,7R,8R,9S,10S,12S,13R,14S,17R)-3,7,12-trihydroxy-10,13-dimethylhexadecahydro-1H-cyclopenta[a]phenanthren-17-yl)heptanoic acid"	[M-H2O+H]+	C27H46O6	Tetrahydroxy bile acids, alcohols and derivatives	FAYYTQMQTAKHRM-QDVPYJSNSA-N	C[C@@H]([C@H]1CC[C@]2([H])[C@]1(C)[C@@H](O)C[C@@]3([H])[C@@]2([H])[C@H](O)C[C@@]4([H])[C@]3(C)CC[C@@H](O)C4)CCC(O)C(C)C(O)=O	0.38652	0.0038893	1.60524
786	Positive	11.959	600.52	Unknown	[M+H]+	null	null	null	null	0.42474	0.0039035	1.7297
787	Positive	9.112	592.277	no MS2: NCGC00347608-02_C30H38O11_7,11-Methano-2H,4H-oxireno[1,8]cycloocta[1,2-f][2]benzopyran-8-acetic acid, 4-(3-furanyl)dodecahydro-alpha,11-dihydroxy-4a,7,9,9-tetramethyl-2,13-dioxo-10-(1-oxopropoxy)-, methyl ester, (alphaR,4R,4aR,7S,8S,10S,11S,11aR,12aS)-	[M+NH4]+	C30H38O11	Limonoids	FZBGZDZLYSLJFE-MVAMGWTESA-N	CCC(=O)O[C@H]1C(C)(C)[C@H]([C@@H](O)C(=O)OC)[C@@]2(C)C3CC[C@]4(C)C(CC(=O)O[C@H]4C5=COC=C5)[C@]36O[C@@H]6[C@]1(O)C2=O	43.99	0.0039542	1.6096
788	Negative	8.835	516.265	Unknown	[M-H]-	null	null	null	null	0.17015	0.0039542	1.21011
789	Negative	6.791	530.248	Unknown	[M-H]-	null	null	null	null	0.046106	0.0039542	1.29063
790	Negative	6.559	530.251	Unknown	[M-H]-	null	null	null	null	0.11907	0.0039542	1.53826
791	Negative	1.303	940.326	Unknown	[M-H]-	null	null	null	null	0.022596	0.0039542	1.26993
792	Positive	9.292	580.409	Unknown	[M+H]+	null	null	null	null	6.8678	0.0039596	1.3299
793	Positive	14.536	806.639	Unknown	[M+H]+	null	null	null	null	0.4947	0.0039659	1.46125
794	Positive	10.864	555.4	Unknown	[M+H]+	null	null	null	null	0.40325	0.0039665	1.35422
795	Positive	7.67	377.252	Unknown	[M+H]+	null	null	null	null	2.8708	0.0039665	1.00899
796	Positive	9.679	662.449	Unknown	[M+H]+	null	null	null	null	9.4181	0.0039858	1.45106
797	Positive	9.806	650.451	Unknown	[M+H]+	null	null	null	null	4.0725	0.0039947	1.08296
798	Positive	0.219	689.617	Unknown	[M+H]+	null	null	null	null	0.39599	0.0040266	1.34013
799	Positive	13.352	353.298	Unknown	[M+H]+	null	null	null	null	0.36176	0.0040347	1.63127
800	Positive	6.028	298.209	low score: 3-oxo-C12 homoserine lactone	[M+H]+	C16H27NO4	N-acyl-alpha amino acids and derivatives	PHSRRHGYXQCRPU-UHFFFAOYSA-N	CCCCCCCCCC(=O)CC(=O)NC1CCOC1=O	2.6105	0.0040536	1.53079
801	Positive	12.939	904.624	Unknown	[M+H]+	null	null	null	null	6.6971	0.0040536	1.33504
802	Positive	11.291	580.398	Unknown	[M+H]+	null	null	null	null	4.4369	0.004064	1.2019
803	Positive	13.789	339.323	Unknown	[M+H]+	null	null	null	null	0.36634	0.0040747	1.67192
804	Negative	9.863	500.267	no MS2: NCGC00380616-01_C28H39NO7_Spiro[2H-furo[2,3-e]isoindole-2,1'(2'H)-naphthalene]-7(3H)-acetic acid, 3',4',4'a,5',6,6',7',8,8',8'a-decahydro-4,6',7'-trihydroxy-2',5',5',8'a-tetramethyl-alpha-(1-methylethyl)-6-oxo-, (alphaS,2R,2'R,6'S,7'R,8'aS)-	[M-H]-	C28H39NO7	Valine and derivatives	JJWKFIISZGZPHY-PTNCSMPOSA-N	CC(C)[C@H](N1CC2=C(C=C(O)C3=C2O[C@]4(C3)[C@H](C)CCC5C(C)(C)[C@H](O)[C@H](O)C[C@]45C)C1=O)C(O)=O	0.20382	0.0040747	1.31617
805	Positive	15	281.068	no MS2: Yangonin	[M+Na]+	C15H14O4	Kavalactones	XLHIYUYCSMZCCC-VMPITWQZSA-N	O=C1OC(C=CC2=CC=C(OC)C=C2)=CC(OC)=C1	2.9454	0.0040875	1.68366
806	Positive	9.103	522.378	low score: (1S,4aR,6aS,6bR,9R,10R,11R,12aR,14bS)-1,10,11-trihydroxy-9-(hydroxymethyl)-2,2,6a,6b,9,12a-hexamethyl-1,3,4,5,6,6a,7,8,8a,10,11,12,13,14b-tetradecahydropicene-4a-carboxylic acid_major	[M+NH4]+	C30H48O6	Triterpenoids	IFIQVSCCFRXSJV-ZIZFEDMCSA-N	CC1(C)CCC2(C(=O)O)CCC3(C)C(=CCC4C5(C)CC(O)C(O)C(C)(CO)C5CCC43C)C2C1O	39.628	0.0040916	1.53536
807	Positive	9.76	488.369	low score: 15-formyl-16-hydroxy-1,2,14,17,17-pentamethyl-8-(prop-1-en-2-yl)pentacyclo[11.7.0.0?,??.0?,?.0??,??]icosane-5-carboxylic acid_80.1%	[M+NH4]+	C30H46O4	Triterpenoids	SLWJVQQNDGLXTK-UHFFFAOYSA-N	C=C(C)C1CCC2(C(=O)O)CCC3(C)C(CCC4C5(C)C(C=O)C(O)C(C)(C)C5CCC43C)C12	0.42564	0.0041149	1.60842
808	Negative	9.824	562.282	Unknown	[M-H]-	null	null	null	null	2.1972	0.0041191	0.984794
809	Negative	1.168	762.052	Unknown	[M-H]-	null	null	null	null	0.094758	0.0041191	1.15791
810	Positive	9.636	840.621	Unknown	[M+H]+	null	null	null	null	4.9888	0.0041395	1.30439
811	Positive	19.842	806.635	Unknown	[M+H]+	null	null	null	null	0.36592	0.0041465	1.74023
812	Positive	12.518	327.276	Unknown	[M+H]+	null	null	null	null	2.8027	0.0041479	1.49239
813	Positive	6.195	346.226	no MS2: (2S)-2-[(1S)-1-carboxyundecyl]-5-oxotetrahydrofuran-2-carboxylic acid_major	[M+NH4]+	C17H28O6	Tricarboxylic acids and derivatives	TUXHHVJPGQUPCF-DYVFJYSZSA-N	CCCCCCCCCCC(C(=O)O)C1(C(=O)O)CCC(=O)O1	2.3959	0.0041728	0.930056
814	Positive	1.607	307.106	low score: Cimifugin	[M+H]+	C16H18O6	Furanochromones	ATDBDSBKYKMRGZ-ZDUSSCGKSA-N	O=C1C=C(OC=2C=C3OC(CC3=C(OC)C12)C(O)(C)C)CO	6.1022	0.0041788	1.40098
815	Negative	8.199	574.215	Unknown	[M-H]-	null	null	null	null	0.18693	0.004193	1.1934
816	Negative	1.355	608.201	Unknown	[M-H]-	null	null	null	null	0.04897	0.0042256	1.2874
817	Positive	1.16	373.049	no MS2: NCGC00380638-01! [IIN-based: Match]	[M+H]+	C19H13ClO6	Xanthones	POXKBPUNCDMQMW-YLVJLNSGSA-N	COC1=C2[C@H]3C=CO[C@H]3OC2=CC4=C1C(=O)C5=C(OC)C(Cl)=CC=C5O4	3.5317	0.0042257	1.32327
818	Positive	5.67	297.104	no MS2: NCGC00180099-02!methyl 2-[(3-formamido-2-hydroxybenzoyl)amino]-3-hydroxybutanoate	[M+H]+	C13H16N2O6	Acylaminobenzoic acid and derivatives	FKDSAXOHMLWBNA-UHFFFAOYSA-N	COC(=O)C(NC(=O)C1=C(O)C(NC=O)=CC=C1)C(C)O	2.4737	0.0042547	1.64924
819	Positive	1.188	519.771	Unknown	[M+H]+	null	null	null	null	8.8735	0.0042603	1.18006
820	Positive	9.255	991.758	Unknown	[M+H]+	null	null	null	null	0.38933	0.0042719	1.68302
821	Negative	6.612	642.121	Unknown	[M-H]-	null	null	null	null	0.025104	0.0042719	1.22217
822	Positive	12.977	353.301	Unknown	[M+H]+	null	null	null	null	0.39375	0.0042758	1.7097
823	Positive	1.537	297.102	low score: OCP_297.1002_16.5	[M+H]+	C14H17ClN2O3	Phenylpiperazines	FMKKWAHJJLLAOW-UHFFFAOYSA-N	OC(=O)CCC(=O)N1CCN(CC1)c1ccccc1Cl	2.7581	0.0042758	1.6929
824	Positive	11.253	428.412	Unknown	[M+H]+	null	null	null	null	0.42647	0.0042758	1.58967
825	Positive	8.322	532.335	Unknown	[M+Na]+	null	null	null	null	0.4962	0.004281	1.18326
826	Positive	10.275	580.43	Unknown	[M+H]+	null	null	null	null	5.1125	0.0043022	1.04663
827	Positive	10.837	664.462	Unknown	[M+H]+	null	null	null	null	23.847	0.0043118	1.30537
828	Positive	6.116	771.346	Unknown	[M+H]+	null	null	null	null	28.495	0.0043118	1.4723
829	Positive	6.051	312.187	low score: Dienogest	[M+H]+	C20H25NO2	Oxosteroids	AZFLJNIPTRTECV-FUMNGEBKSA-N	C[C@]12CCC3=C4CCC(=O)C=C4CC[C@H]3[C@@H]1CC[C@]2(CC#N)O	2.4257	0.0043479	1.31562
830	Positive	14.551	784.653	Unknown	[M+H]+	null	null	null	null	0.41456	0.0043479	1.54532
831	Negative	1.105	698.156	Unknown	[M-H]-	null	null	null	null	0.074862	0.0043479	1.21006
832	Positive	1.16	248.185	no MS2: Methoxetamine	[M+H]+	C15H21NO2	Anisoles	LPKTWLVEGBNOOX-UHFFFAOYSA-N	CCNC1(CCCCC1=O)C2=CC(=CC=C2)OC	4.5444	0.004351	1.49598
833	Positive	6.349	446.324	no MS2: Alanine conjugated chenodeoxycholic acid	[M-H2O+H]+	C27H45NO5	Glycinated bile acids and derivatives	HHGKPVQSNIVPPF-STVJXAOYSA-N	C[C@H](CCC(N[C@@H](C)C(O)=O)=O)[C@H]1CC[C@@]2([H])[C@]3([H])[C@H](O)C[C@]4([H])C[C@H](O)CC[C@]4(C)[C@H]3CC[C@@]21C	2.9233	0.004361	1.1682
834	Positive	8.996	502.294	low score: Fexofenadine	[M+H]+	C32H39NO4	Diphenylmethanes	RWTNPBWLLIMQHL-UHFFFAOYSA-N	CC(C)(C1=CC=C(C=C1)C(CCCN2CCC(CC2)C(C3=CC=CC=C3)(C4=CC=CC=C4)O)O)C(=O)O	6.6117	0.0043842	1.11591
835	Negative	1.299	484.248	Unknown	[M-H]-	null	null	null	null	0.01219	0.0043861	1.29479
836	Positive	11.749	477.392	low score: Mogrol	[M+H]+	C30H52O4	Cucurbitacins	JLYBBRAAICDTIS-LWEHFMDWSA-N	OC(CCC(C)C1CCC2(C)C3CC=C4C(CCC(O)C4(C)C)C3(C)C(O)CC12C)C(O)(C)C	4.0567	0.0044388	1.31376
837	Positive	12.979	313.298	low score: icosanoic acid	[M+H-H2O]+	C20H40O2	Long-chain fatty acids	VKOBVWXKNCXXDE-UHFFFAOYSA-N	O=C(O)CCCCCCCCCCCCCCCCCCC	0.43368	0.0044577	1.60822
838	Negative	1.172	706.091	Unknown	[M-H]-	null	null	null	null	0.10107	0.0044726	1.21488
839	Negative	6.937	547.269	no MS2: Animicin A	[M-H]-	C28H40N2O9	N-acyl-alpha amino acids and derivatives	UIFFUZWRFRDZJC-UHFFFAOYSA-N	CCCCCCC1C(C(OC(=O)C(C(OC1=O)C)NC(=O)C2=C(C(=CC=C2)NC=O)O)C)OC(=O)CC(C)C	0.12602	0.0044766	1.40312
840	Positive	13.79	402.396	Unknown	[M+H]+	null	null	null	null	0.40902	0.0044947	1.63699
841	Negative	6.646	574.216	Unknown	[M-H]-	null	null	null	null	0.075851	0.0044966	1.40045
842	Positive	13.582	398.271	no MS2: Phytosphingosine-1-P	[M+H]+	C18H40NO6P	Phosphosphingolipids	AYGOSKULTISFCW-KZNAEPCWSA-N	CCCCCCCCCCCCCC[C@H]([C@@H]([C@@H](COP(=O)(O)O)N)O)O	0.4161	0.004515	1.70673
843	Positive	8.457	525.315	no MS2: NCGC00180395-03!(2E,6E,12E)-18-(2,6-dioxopiperidin-4-yl)-9,11-dihydroxy-8-methoxy-10,12,14-trimethyl-15-oxooctadeca-2,6,12-trienoic acid	[M+NH4]+	C27H41NO8	Lineolic acids and derivatives	YQDJUXPUIRGKNV-MNOLRWOYSA-N	COC(\C=C\CC\C=C\C(O)=O)C(O)C(C)C(O)C(\C)=C\C(C)C(=O)CCCC1CC(=O)NC(=O)C1	7.607	0.004515	1.28596
844	Positive	9.67	610.416	low score: Emericellamide A	[M+H]+	C31H55N5O7	Cyclic depsipeptides	QURRTAYEASAREY-OOVPVTRWSA-N	CCCCCC[C@H](C)[C@H]1OC(=O)[C@H](C)NC(=O)[C@H](C)NC(=O)[C@H](CC(C)C)NC(=O)[C@@H](NC(=O)CNC(=O)[C@@H]1C)C(C)C	11.789	0.0045272	1.13609
845	Positive	1.089	686.258	low score: NCGC00180154-02![6-[[1a-(hydroxymethyl)-2-[3,4,5-trihydroxy-6-(hydroxymethyl)oxan-2-yl]oxy-2,5a,6,6a-tetrahydro-1bH-oxireno[5,6]cyclopenta[1,3-c]pyran-6-yl]oxy]-4,5-dihydroxy-2-methyloxan-3-yl] (E)-3-(4-methoxyphenyl)prop-2-enoate [IIN-based: Match]	[M+NH4]+	C31H40O16	Cinnamic acid esters	RTCISXKUWWQSRF-VMPITWQZSA-N	COC1=CC=C(\\C=C\\C(=O)OC2C(C)OC(OC3C4OC4(CO)C5C3C=COC5OC6OC(CO)C(O)C(O)C6O)C(O)C2O)C=C1	0.041442	0.0045325	1.20149
846	Positive	0.628	325.249	Unknown	[M+H]+	null	null	null	null	0.44464	0.0045443	1.69816
847	Negative	9.557	616.293	Unknown	[M-H]-	null	null	null	null	2.0292	0.0045665	1.26515
848	Negative	7.828	537.26	Unknown	[M-H]-	null	null	null	null	0.42922	0.0045669	1.14074
849	Positive	6.342	281.071	no MS2: Sulfameter (Bayrena)	[M+H]+	C11H12N4O3S	Aminobenzenesulfonamides	GPTONYMQFTZPKC-UHFFFAOYSA-N	C1(=CC=C(C=C1)S(NC2=NC=C(C=N2)OC)(=O)=O)N	2.552	0.00457	1.69808
850	Positive	9.346	598.482	Unknown	[M+H]+	null	null	null	null	0.38216	0.00457	1.14317
851	Positive	14.54	758.636	Unknown	[M+H]+	null	null	null	null	0.45222	0.00457	1.22646
852	Positive	18.283	604.567	Unknown	[M+H]+	null	null	null	null	0.38679	0.0045765	1.60356
853	Positive	6.831	520.177	low score: NCGC00380203-01_C26H30ClNO8_2-{7-Acetoxy-5-chloro-3-[(1E,3E)-3,5-dimethyl-1,3-heptadien-1-yl]-7-methyl-6,8-dioxo-7,8-dihydro-2(6H)-isoquinolinyl}pentanedioic acid	[M+H]+	C26H30ClNO8	Glutamic acid and derivatives	BVIXPBFQDINHQZ-XHBXSBNISA-N	CCC(C)\C=C(C)\C=C\C1=C\C/2=C(Cl)/C(=O)C(C)(OC(C)=O)C(=O)C2=C\N1C(CCC(O)=O)C(O)=O	36.425	0.0045926	1.55274
854	Negative	1.162	570.199	Unknown	[M-H]-	null	null	null	null	0.014738	0.0046008	1.45852
855	Positive	0.547	281.072	low score: Yangonin	[M+Na]+	C15H14O4	Kavalactones	XLHIYUYCSMZCCC-VMPITWQZSA-N	O=C1OC(C=CC2=CC=C(OC)C=C2)=CC(OC)=C1	2.5417	0.0046013	1.71474
856	Positive	1.25	263.011	no MS2: L-Cystine	[M+Na]+	C6H12N2O4S2	L-cysteine-S-conjugates	LEVWYRKDKASIDU-IMJSIDKUSA-N	O=C(O)C(N)CSSCC(N)C(=O)O	3.4581	0.0046079	1.1805
857	Negative	1.309	494.23	low score: NCGC00380287-01_C28H33NO7_(1E,4S,6R,7E,11aS,14S,14aS,15S,15aR,16aS,16bS)-14-Benzyl-6-hydroxy-4,6,15,15a-tetramethyl-3,13,14,14a,15,15a,16a,16b-octahydro[1,3]dioxacyclotridecino[4,5-d]oxireno[f]isoindole-5,10,12(4H,6H)-trione	[M-H]-	C28H33NO7	Cytochalasans	LAJXCUNOQSHRJO-DDAXAKGKSA-N	C[C@H]1C/C=C/[C@H]2[C@@H]3O[C@]3(C)[C@@H](C)[C@H]4[C@H](CC5=CC=CC=C5)NC(=O)[C@@]24OC(=O)O/C=C/[C@@](C)(O)C1=O	0.044555	0.0046312	1.30613
858	Positive	8.12	851.474	Unknown	[M+H]+	null	null	null	null	0.2802	0.0046382	1.531
859	Positive	7.353	448.34	low score: "N-((4R)-4-((3R,5S,9S,10S,13R,14S,17R)-3-hydroxy-10,13-dimethylhexadecahydro-1H-cyclopenta[a]phenanthren-17-yl)pentanoyl)-N-methylglycine"	[M+H]+	C27H45NO4	Glycinated bile acids and derivatives	PPDYNVKBDBQLEM-RMXYKXGFSA-N	[H][C@@]12CC[C@@]3(C[C@H](O)CC[C@]3(C)[C@H]1CC[C@@]4(C)[C@H]2CC[C@@H]4[C@@H](CCC(N(C)CC(O)=O)=O)C)[H]	0.47696	0.0046416	1.31107
860	Positive	0.548	299.101	low score: Amlexanox	[M+H]+	C16H14N2O4	Chromeno[2,3-b]pyridine-5-ones	SGRYPYWGNKJSDL-UHFFFAOYSA-N	O=C(O)C1=CC=2C(=O)C3=CC(=CC=C3OC2N=C1N)C(C)C	2.2191	0.0046756	1.59066
861	Positive	14.829	297.103	low score: Gigantol	[M+Na]+	C16H18O4	Stilbenes	SDXKZPQOVUDXIY-UHFFFAOYSA-N	OC=1C=C(OC)C=C(C1)CCC2=CC=C(OC)C(O)=C2	2.4985	0.004676	1.62936
862	Positive	8.298	277.206	Unknown	[M+H]+	null	null	null	null	0.48881	0.0046803	1.67725
863	Positive	9.264	518.357	low score: "Orlistat (Alli, Xenical)"	[M+Na]+	C29H53NO5	Leucine and derivatives	AHLBNYSZXLDEJQ-FWEHEUNISA-N	C1([C@H]([C@@H](O1)C[C@H](CCCCCCCCCCC)OC(=O)[C@H](CC(C)C)NC(=O)[H])CCCCCC)=O	0.48105	0.0046803	1.67143
864	Positive	18.991	708.571	Unknown	[M+H]+	null	null	null	null	0.37628	0.0046803	1.6045
865	Negative	1.442	625.156	low score: NCGC00385356-01![(2S,3R,4S,5R,6R)-3,5-dihydroxy-2-[[5-hydroxy-2-(4-hydroxyphenyl)-4-oxo-2,3-dihydrochromen-7-yl]oxy]-6-(hydroxymethyl)oxan-4-yl] (E)-3-(4-hydroxyphenyl)prop-2-enoate	[M+HCOO]-	C30H28O12	Flavonoid-7-O-glycosides	BEHIONSZUBFJLA-JKIGBVBOSA-N	OC[C@H]1O[C@@H](OC2=CC(O)=C3C(=O)CC(OC3=C2)C4=CC=C(O)C=C4)[C@H](O)[C@@H](OC(=O)\C=C\C5=CC=C(O)C=C5)[C@@H]1O	0.034844	0.0047007	1.27927
866	Positive	1.052	358.865	Unknown	[M+H]+	null	null	null	null	6.0773	0.0047167	1.32201
867	Positive	13.791	374.361	low score: Conessine	[M+NH4]+	C24H40N2	Conanine-type alkaloids	GPLGAQQQNWMVMM-MYAJQUOBSA-N	C1=C2CC(N(C)C)CCC2(C)C3CCC45CN(C)C(C)C5CCC4C3C1	0.36518	0.0047515	1.59259
868	Positive	13.352	331.315	low score: MMV687273	[M+H]+	C22H38N2	Monoterpenoids	JFIBVDBTCDTBRH-IDUWFGFVSA-N	C(=C(C)C)CCC(=CCNCCNC1C2CC3CC(C2)CC1C3)C	0.38135	0.0047838	1.62892
869	Positive	12.255	377.353	low score: tricosanoic acid	[M+Na]+	C23H46O2	Very long-chain fatty acids	XEZVDURJDFGERA-UHFFFAOYSA-N	O=C(O)CCCCCCCCCCCCCCCCCCCCCC	2.4973	0.0047838	1.61054
870	Negative	1.016	776.171	Unknown	[M-H]-	null	null	null	null	0.21557	0.0047838	1.14662
871	Positive	9.092	297.104	no MS2: OCP_297.1002_16.5	[M+H]+	C14H17ClN2O3	Phenylpiperazines	FMKKWAHJJLLAOW-UHFFFAOYSA-N	OC(=O)CCC(=O)N1CCN(CC1)c1ccccc1Cl	2.2411	0.0048005	1.57812
872	Positive	1.081	440.976	Unknown	[M+H]+	null	null	null	null	9.651	0.0048005	1.19699
873	Positive	9.363	504.38	no MS2: (1R,2R,5S,8R,14R,15R,16S)-16-hydroxy-1,2,14,17,17-pentamethyl-8-(prop-1-en-2-yl)pentacyclo[11.7.0.0?,??.0?,?.0??,??]icosane-5,15-dicarboxylic acid	[M+NH4]+	C30H46O5	Triterpenoids	WLCHQSHZHFLMJH-GAVPBTRYSA-N	O=C(O)C1C(O)C(C)(C)C2CCC3(C)C(CCC4C5C(C(=C)C)CCC5(C(=O)O)CCC43C)C12C	2.9504	0.0048354	1.26639
874	Positive	11.001	388.247	low score: (1r,5R,7S)-5,7-diethyl-2-(1-ethyl-2-methyl-1H-indol-3-yl)-1,3-diazaadamantan-6-one	[M+Na]+	C23H31N3O	N-alkylindoles	KRYFHYSXWHRZKT-BRTIRZTQSA-N	O=C1C2(CN3CC1(CN(C2)C3C=4C=5C=CC=CC5N(C4C)CC)CC)CC	0.4204	0.0048485	1.58214
875	Negative	6.471	122.89	Unknown	[M-H]-	null	null	null	null	0.49267	0.004865	1.31071
876	Negative	1.017	718.208	Unknown	[M-H]-	null	null	null	null	0.18482	0.0049226	1.15134
877	Positive	14.779	350.36	Unknown	[M+H]+	null	null	null	null	0.43581	0.0049301	1.67566
878	Positive	19.411	823.582	Unknown	[M+H]+	null	null	null	null	0.40862	0.0049639	1.52302
879	Positive	19.915	441.338	low score: NCGC00169592-02_C29H46O4_3aH-Cyclopenta[a]chrysene-3a-carboxylic acid, 1-acetyleicosahydro-9-hydroxy-5a,5b,8,8,11a-pentamethyl-, (1R,3aS,5aR,5bR,9S,11aR)-	[M-H2O+H]+	C29H46O4	Oxosteroids	RVMPLOSJMIQORE-XPDAHERZSA-N	CC(=O)[C@@H]1CC[C@@]2(CC[C@]3(C)C(CCC4[C@@]5(C)CC[C@H](O)C(C)(C)C5CC[C@@]34C)C12)C(O)=O	0.41032	0.0049672	1.83341
880	Positive	7.837	436.298	low score: Simvastatin M+NH4	[M+NH4]+	C25H38O5	Delta valerolactones	RYMZZMVNJRMUDD-HGQWONQESA-N	CCC(C)(C)C(=O)O[C@H]1C[C@H](C=C2[C@H]1[C@H]([C@H](C=C2)C)CC[C@@H]3C[C@H](CC(=O)O3)O)C	0.47049	0.0049672	1.29959
881	Positive	8.621	288.252	Lauryl diethanolamide	[M+H]+	C16H33NO3	N-acyl amines	AOMUHOFOVNGZAN-UHFFFAOYSA-N	CCCCCCCCCCCC(=O)N(CCO)CCO	0.48596	0.0049746	1.38444
882	Negative	1.098	640.572	Unknown	[M-H]-	null	null	null	null	0.46626	0.0049746	1.19312
883	Positive	13.479	325.235	low score: GLYCEROL-MYRISTATE	[M+Na]+	C17H34O4	1-monoacylglycerols	DCBSHORRWZKAKO-UHFFFAOYSA-N	CCCCCCCCCCCCCC(=O)OCC(CO)O	0.40624	0.004978	1.79089
884	Positive	8.943	325.25	Unknown	[M+H]+	null	null	null	null	0.42768	0.004978	1.69701
885	Positive	8.912	324.248	low score: Melophlin B/C/G/K/L/N/O	[M+H]+	C19H33NO3	N-alkylpyrrolidines	WBPPODSRZVXVJK-MSUUIHNZSA-N	CCCCCCCCCCCC/C(O)=C(C1=O)\C(C(N1C)C)=O	0.42691	0.004978	1.60026
886	Positive	8.696	524.317	low score: Aspartate conjugated cholic acid	[M+H]+	C28H45NO8	Glycinated bile acids and derivatives	VMFFESMCXOCOIZ-NCLBRSMESA-N	C[C@H](CCC(N[C@@H](CC(O)=O)C(O)=O)=O)[C@H]1CC[C@@]2([H])[C@]3([H])[C@H](O)C[C@]4([H])C[C@H](O)CC[C@]4(C)[C@H]3C[C@H](O)[C@@]21C	0.4474	0.004978	1.59162
887	Positive	6.444	472.305	low score: GLYCOCHENODEOXYCHOLATE	[M+Na]+	C26H43NO5	Glycinated bile acids and derivatives	GHCZAUBVMUEKKP-UHFFFAOYSA-N	CC(CCC(=O)NCC(=O)O)C1CCC2C1(CCC3C2C(CC4C3(CCC(C4)O)C)O)C	6.2879	0.004978	1.41522
888	Positive	8.022	500.322	low score: Taurodeoxycholate	[M+H]+	C26H45NO6S	Taurinated bile acids and derivatives	AWDRATDZQPNJFN-VAYUFCLWSA-N	C[C@H](CC/C(=N/CCS(=O)(=O)O)/O)[C@H]1CC[C@@H]2[C@@]1([C@H](C[C@H]3[C@H]2CC[C@H]4[C@@]3(CC[C@H](C4)O)C)O)C	0.38942	0.0049951	1.23978
889	Positive	0.741	337.87	Unknown	[M+H]+	null	null	null	null	23.503	0.0050031	1.56571
890	Positive	9.962	374.398	Unknown	[M+H]+	null	null	null	null	0.38761	0.0050117	1.60913
891	Positive	9.616	596.397	Unknown	[M+H]+	null	null	null	null	7.2507	0.0050133	0.975733
892	Positive	7.814	281.071	no MS2: Sulfameter (Bayrena)	[M+H]+	C11H12N4O3S	Aminobenzenesulfonamides	GPTONYMQFTZPKC-UHFFFAOYSA-N	C1(=CC=C(C=C1)S(NC2=NC=C(C=N2)OC)(=O)=O)N	2.3025	0.0050134	1.66011
893	Positive	17.824	490.47	Unknown	[M+H]+	null	null	null	null	0.39599	0.0050199	1.64533
894	Positive	1.076	331	Unknown	[M+H]+	null	null	null	null	6.3819	0.0050199	1.06901
895	Negative	7.785	650.106	Unknown	[M-H]-	null	null	null	null	0.31345	0.0050258	1.39948
896	Positive	9.371	604.332	no MS2: JSTX-3	[M+K]+	C27H47N7O6	Resorcinols	SJLRBGDPTALRDM-QFIPXVFZSA-N	[C@@]([H])(CC(N)=O)(NC(=O)Cc(c1)c(O)cc(O)c1)C(=O)NCCCCCNC(=O)CCNCCCCNCCCN	2.9099	0.0050336	1.17811
897	Positive	1.087	276.942	Unknown	[M+H]+	null	null	null	null	4.3532	0.005044	1.33047
898	Positive	10.633	517.337	low score: Taurochenodeoxycholic acid	[M+NH4]+	C26H45NO6S	Taurinated bile acids and derivatives	BHTRKEVKTKCXOH-BJLOMENOSA-N	C[C@H](CC/C(=N/CCS(=O)(=O)O)/O)[C@H]1CC[C@@H]2[C@@]1(CC[C@H]3[C@H]2[C@@H](C[C@H]4[C@@]3(CC[C@H](C4)O)C)O)C	3.9807	0.005044	0.881188
899	Positive	9.268	534.345	low score: Orlistat	[M+K]+	C29H53NO5	Leucine and derivatives	AHLBNYSZXLDEJQ-FWEHEUNISA-N	CCCCCCCCCCC[C@H](OC([C@@H](NC=O)CC(C)C)=O)C[C@H]1[C@H](CCCCCC)C(O1)=O	0.4394	0.0050671	1.57652
900	Positive	6.551	427.283	low score: "methyl (4R,E)-4-((3R,5S,7S,9S,10S,13R,14S,17R)-3,7-dihydroxy-10,13-dimethylhexadecahydro-1H-cyclopenta[a]phenanthren-17-yl)pent-2-enoate"	[M+Na]+	C25H40O4	7-alpha-hydroxysteroids	AJOPHDUNANPFKQ-VEEBWJHKSA-N	C[C@H](/C=C/C(OC)=O)[C@H]1CC[C@H]2[C@]([C@@H]3CC[C@@]21C)([H])[C@@H](O)C[C@H]4[C@]3(C)CC[C@@H](O)C4	4.8183	0.0050835	1.26802
901	Positive	0.118	430.428	Unknown	[M+H]+	null	null	null	null	0.41378	0.0050843	1.63602
902	Positive	0.539	297.104	low score: 2-(2,3-dihydrobenzo[b][1,4]dioxin-6-yl)-6-methylchroman-4-one	[M+H]+	C18H16O4	Flavonolignans	FVNYMYXXKXAQHS-UHFFFAOYSA-N	O=C1C2=CC(=CC=C2OC(C3=CC=C4OCCOC4=C3)C1)C	2.501	0.0050968	1.73006
903	Positive	11.593	622.449	Unknown	[M+H]+	null	null	null	null	17.035	0.0051012	1.30627
904	Positive	18.409	685.481	low score: Thermoactinoamide_H	[M+H]+	C37H60N6O6	Oligopeptides	SOUJZMNYLOOKTJ-KTJLHJPUSA-N	O=C(N[C@@H](CC(C)C)C(N[C@H](CC(C)C)C(N[C@H]1CC(C)C)=O)=O)[C@H](C(C)C)NC([C@@H](CC2=CC=CC=C2)NC([C@@H](C(C)C)NC1=O)=O)=O	3.6436	0.0051147	1.26984
905	Positive	1.026	226.951	Unknown	[M+H]+	null	null	null	null	11.658	0.0051498	1.4766
906	Positive	13.349	420.25	low score: Phytosphingosine-1-P	[M+Na]+	C18H40NO6P	Phosphosphingolipids	AYGOSKULTISFCW-KZNAEPCWSA-N	CCCCCCCCCCCCCC[C@H]([C@@H]([C@@H](COP(=O)(O)O)N)O)O	0.38882	0.0051498	1.47596
907	Positive	17.896	615.513	Unknown	[M+H]+	null	null	null	null	0.3976	0.0051498	1.46052
908	Positive	8.583	482.367	Unknown	[M+H]+	null	null	null	null	0.42868	0.005175	1.49821
909	Negative	1.165	979.902	Unknown	[M-H]-	null	null	null	null	0.11201	0.0051784	1.11623
910	Positive	8.765	518.763	Unknown	[M+H]+	null	null	null	null	0.43032	0.0051979	1.33959
911	Negative	6.47	168.88	Unknown	[M-H]-	null	null	null	null	0.45091	0.0051979	1.38692
912	Positive	0.412	182.963	Unknown	[M+H]+	null	null	null	null	14.319	0.0052069	1.3153
913	Positive	1.146	166.086	Phenylalanine	[M+H]+	C9H11NO2	Phenylalanine and derivatives	COLNVLDHVKWLRT-UHFFFAOYSA-N	O=C(O)C(N)CC=1C=CC=CC1	4.7779	0.0052175	1.53392
914	Positive	1.169	544.744	Unknown	[M+H]+	null	null	null	null	10.118	0.0052175	1.3089
915	Positive	15.513	397.305	low score: Unknown (carbon number 27); PlaSMA ID-2179	[M+H]+	C27H40O2	Unknown	null	null	0.38864	0.0052302	1.54883
916	Positive	1.105	562.805	Unknown	[M+H]+	null	null	null	null	7.7498	0.0052302	1.31499
917	Positive	1.942	114.093	low score: Unknown (carbon number 6); PlaSMA ID-45	[M+H]+	C6H11NO	Unknown	null	null	5.8175	0.0052333	1.72003
918	Positive	0.725	287.248	low score: Unknown (carbon number 20); PlaSMA ID-1412	[M+H]+	C20H30O	Unknown	null	null	0.4576	0.0052584	1.71109
919	Positive	1.038	222.899	Unknown	[M+H]+	null	null	null	null	0.45686	0.005272	1.15885
920	Positive	13.992	455.376	Unknown	[M+H]+	null	null	null	null	0.3957	0.005272	1.36506
921	Negative	1.277	636.192	Unknown	[M-H]-	null	null	null	null	0.037495	0.005272	1.37315
922	Positive	10.865	716.498	Unknown	[M+H]+	null	null	null	null	3.7544	0.0053236	1.14303
923	Positive	0.731	214.916	Unknown	[M+H]+	null	null	null	null	8.1525	0.0053337	1.16084
924	Positive	12.354	464.415	Unknown	[M+H]+	null	null	null	null	0.40517	0.0053395	1.70572
925	Positive	1.168	426.82	Unknown	[M+H]+	null	null	null	null	7.164	0.0053471	1.37492
926	Positive	12.561	775.622	Unknown	[M+H]+	null	null	null	null	4.4458	0.0053471	1.28371
927	Negative	1.315	496.251	Unknown	[M-H]-	null	null	null	null	0.033594	0.0053953	1.3557
928	Negative	7.263	529.254	Unknown	[M-H]-	null	null	null	null	0.14193	0.0053953	1.17104
929	Positive	6.452	297.104	no MS2: OCP_297.1002_16.5	[M+H]+	C14H17ClN2O3	Phenylpiperazines	FMKKWAHJJLLAOW-UHFFFAOYSA-N	OC(=O)CCC(=O)N1CCN(CC1)c1ccccc1Cl	2.4318	0.0054133	1.60128
930	Positive	16.79	664.595	Unknown	[M+H]+	null	null	null	null	0.41361	0.0054477	1.76578
931	Negative	1.06	824.09	Unknown	[M-H]-	null	null	null	null	0.25642	0.0054568	1.147
932	Positive	7.808	621.351	low score: NCGC00381318-01![3-methyl-1-[3-methyl-1-[3-methyl-1-oxo-1-(2,3,4,5,6-pentahydroxyhexoxy)pentan-2-yl]oxy-1-oxopentan-2-yl]oxy-1-oxopentan-2-yl] 2-hydroxy-3-methylpentanoate [IIN-based on: CCMSLIB00000845116]	[M-H2O+H]+	C30H54O14	Depsipeptides	XHFZCGJKWBSHAG-UHFFFAOYSA-N	CCC(C)C(O)C(=O)OC(C(C)CC)C(=O)OC(C(C)CC)C(=O)OC(C(C)CC)C(=O)OCC(O)C(O)C(O)C(O)CO	0.41868	0.0054808	1.62466
933	Positive	6.163	448.305	low score: glycohyocholic acid	[M-H2O+H]+	C26H43NO6	Glycinated bile acids and derivatives	ZQYUKJFJPJDMMR-ZDWCHQGWSA-N	C[C@H](CCC(=O)NCC(=O)O)[C@H]1CC[C@@H]2[C@@]1(CC[C@H]3[C@H]2[C@@H]([C@@H]([C@H]4[C@@]3(CC[C@H](C4)O)C)O)O)C	2.6488	0.0055097	1.4008
934	Positive	5.916	122.105	2,6-Xylidine	[M+H]+	C8H11N	m-Xylenes	UFFBMTHBGFGIHF-UHFFFAOYSA-N	Cc1cccc(c1N)C	8.8404	0.0055097	1.27924
935	Positive	0.718	141.968	Unknown	[M+H]+	null	null	null	null	10.047	0.0055097	1.56688
936	Positive	15.228	297.104	no MS2: OCP_297.1002_16.5	[M+H]+	C14H17ClN2O3	Phenylpiperazines	FMKKWAHJJLLAOW-UHFFFAOYSA-N	OC(=O)CCC(=O)N1CCN(CC1)c1ccccc1Cl	2.8903	0.0055258	1.61494
937	Positive	6.474	460.308	Unknown	[M+H]+	null	null	null	null	2.361	0.0055506	1.27112
938	Positive	0.555	282.072	low score: skimmianine	[M+Na]+	C14H15NO4	Dihydrofuranoquinolines	CKDKGHDDRAMHGK-UHFFFAOYSA-N	N=1C=2OCCC2C(OC)=C3C=CC(OC)=C(OC)C13	2.2671	0.0055641	1.63945
939	Positive	13.35	313.303	low score: arachidic acid_64.0%	[M+H]+	C20H40O2	Long-chain fatty acids	VKOBVWXKNCXXDE-UHFFFAOYSA-N	CCCCCCCCCCCCCCCCCCCC(=O)O	0.3937	0.0056025	1.58813
940	Positive	14.354	357.093	no MS2: NCGC00380667-01_C15H20N2O4S2_Pyrazino[1,2-a]indole-1,4-dione, 2,3,5a,6,10,10a-hexahydro-6-hydroxy-3-(hydroxymethyl)-2-methyl-3,10a-bis(methylthio)-, (3R,5aS,6S,10aR)-	[M+H]+	C15H20N2O4S2	Alpha amino acids and derivatives	OVBAGMZLGLXSBN-UOVKNHIHSA-N	CS[C@@]1(CO)N(C)C(=O)[C@@]2(CC/3=C/C=C\[C@H](O)[C@H]3N2C1=O)SC	18.221	0.0056143	1.34032
941	Negative	1.128	715.143	no MS2: Psoromic acid	[2M-H]-	C18H14O8	Depsides and depsidones	FUCWJKJZOHOLEO-UHFFFAOYSA-N	O=C1c2c(C)cc(O)c(C=O)c2Oc2c(O1)c(c(cc2C(=O)O)OC)C	0.23014	0.0056143	1.04802
942	Negative	8.888	967.514	Unknown	[M-H]-	null	null	null	null	0.11824	0.0056152	1.15915
943	Negative	1.031	708.183	Unknown	[M-H]-	null	null	null	null	0.11883	0.0056274	1.22735
944	Positive	13.07	540.485	Unknown	[M+H]+	null	null	null	null	2.9986	0.0056286	1.38352
945	Positive	11.431	496.375	no MS2: 1-O-hexadecyl-2-C-methyl-3-phosphatidylcholine	[M+H]+	C25H54NO6P	Glycerophosphocholines	BZLKOORCGCYQJZ-UHFFFAOYSA-N	CCCCCCCCCCCCCCCCOCC(C)(COP(=O)([O-])OCC[N+](C)(C)C)O	2.0293	0.0056495	0.8526
946	Positive	1.448	297.106	low score: Gigantol	[M+Na]+	C16H18O4	Stilbenes	SDXKZPQOVUDXIY-UHFFFAOYSA-N	OC=1C=C(OC)C=C(C1)CCC2=CC=C(OC)C(O)=C2	2.338	0.0056495	1.64907
947	Positive	10.859	562.366	Unknown	[M+H]+	null	null	null	null	0.43264	0.0056495	1.46895
948	Positive	12.393	363.193	Unknown	[M+H]+	null	null	null	null	3.0513	0.0056495	1.09265
949	Positive	12.98	331.31	low score: MMV687273	[M+H]+	C22H38N2	Monoterpenoids	JFIBVDBTCDTBRH-IDUWFGFVSA-N	C(=C(C)C)CCC(=CCNCCNC1C2CC3CC(C2)CC1C3)C	0.43882	0.005652	1.63013
950	Positive	9.423	518.339	low score: Retapamulin	[M+H]+	C30H47NO4S	Pleuromutilin and derivatives	STZYTFJPGGDRJD-FAJFTSBPSA-N	[C@]12(CC[C@@](N1C)(C[C@H](C2)SCC(O[C@@H]3C[C@]([C@H]([C@@H]([C@]45[C@]([C@@]3(C)[C@H](CC4)C)(C(CC5)=O)[H])C)O)(C)C=C)=O)[H])[H]	6.8573	0.0056534	0.926358
951	Negative	0.445	644.121	Unknown	[M-H]-	null	null	null	null	0.083848	0.0056534	1.26283
952	Positive	12.922	788.61	no MS2: PC 18:0/18:1(9Z)	[M+H]+	C44H86NO8P	Phosphatidylcholines	ATHVAWFAEPLPPQ-VRDBWYNSSA-N	CCCCCCCCCCCCCCCCCC(=O)OC[C@H](COP(=O)([O-])OCC[N+](C)(C)C)OC(=O)CCCCCCC/C=C\CCCCCCCC	2.4813	0.0056591	1.05749
953	Positive	0.577	222.133	low score: Dihydrozeatin	[M+H]+	C10H15N5O	6-alkylaminopurines	XXFACTAYGKKOQB-UHFFFAOYSA-N	OCC(C)CCNC=1N=CNC2=NC=NC21	0.4603	0.0056662	1.66009
954	Positive	0.823	223.064	low score: Isofraxidin	[M+H]+	C11H10O5	7-hydroxycoumarins	HOEVRHHMDJKUMZ-UHFFFAOYSA-N	O=C1OC=2C(OC)=C(O)C(OC)=CC2C=C1	8.0811	0.0056728	1.03563
955	Positive	0.653	281.072	no MS2: Sulfameter (Bayrena)	[M+H]+	C11H12N4O3S	Aminobenzenesulfonamides	GPTONYMQFTZPKC-UHFFFAOYSA-N	C1(=CC=C(C=C1)S(NC2=NC=C(C=N2)OC)(=O)=O)N	2.5037	0.0056733	1.6548
956	Positive	9.254	496.385	1-O-hexadecyl-2-C-methyl-3-phosphatidylcholine	[M+H]+	C25H54NO6P	Glycerophosphocholines	BZLKOORCGCYQJZ-UHFFFAOYSA-N	CCCCCCCCCCCCCCCCOCC(C)(COP(=O)([O-])OCC[N+](C)(C)C)O	0.45253	0.005689	1.87135
957	Positive	9.192	230.157	Unknown	[M+H]+	null	null	null	null	6.7722	0.0056945	1.50114
958	Positive	0.759	304.275	Unknown	[M+H]+	null	null	null	null	0.44509	0.0057228	1.67553
959	Negative	1.277	651.173	Unknown	[M-H]-	null	null	null	null	0.041417	0.0057349	1.32951
960	Positive	0.643	297.104	no MS2: NCGC00180099-02!methyl 2-[(3-formamido-2-hydroxybenzoyl)amino]-3-hydroxybutanoate	[M+H]+	C13H16N2O6	Acylaminobenzoic acid and derivatives	FKDSAXOHMLWBNA-UHFFFAOYSA-N	COC(=O)C(NC(=O)C1=C(O)C(NC=O)=CC=C1)C(C)O	2.4546	0.0057361	1.65619
961	Negative	6.714	510.226	Unknown	[M-H]-	null	null	null	null	0.058825	0.0057361	1.20784
962	Positive	0.425	229.908	Unknown	[M+H]+	null	null	null	null	67.533	0.0057601	1.36276
963	Positive	1.12	378.887	Unknown	[M+H]+	null	null	null	null	4.2733	0.0057632	1.38812
964	Positive	14.91	804.62	Unknown	[M+H]+	null	null	null	null	0.37803	0.005772	1.57261
965	Positive	12.3	427.342	low score: 5Alpha-Cholestanol	[M+K]+	C27H48O	Cholesterols and derivatives	QYIXCDOBOSTCEI-QCYZZNICSA-N	OC1CCC2(C)C(CCC3C4CCC(C(C)CCCC(C)C)C4(C)CCC32)C1	0.39617	0.0058011	1.65118
966	Positive	13.354	376.377	Unknown	[M+H]+	null	null	null	null	0.41333	0.0058041	1.57711
967	Negative	1.256	530.253	Unknown	[M-H]-	null	null	null	null	0.035995	0.0058041	1.2583
968	Negative	7.263	556.302	Unknown	[M-H]-	null	null	null	null	0.13798	0.0058041	1.14385
969	Positive	1.226	583.392	no MS2: Diacetylpyxinol	[M+Na]+	C34H56O6	Triterpene saponins	TWRWTOXPYGQKPW-ZWXXETMRSA-N	CC1(C2C(CCC1OC(=O)C)(C)C1C(CC2)([C@]2(C(C(C1)O)C(CC2)[C@]1(C)O[C@@H](C(C)(OC(=O)C)C)CC1)C)C)C	0.042107	0.0058196	1.23436
970	Positive	0.173	758.635	Unknown	[M+H]+	null	null	null	null	0.4047	0.0058212	1.74032
971	Positive	1.518	281.071	low score: Yangonin	[M+Na]+	C15H14O4	Kavalactones	XLHIYUYCSMZCCC-VMPITWQZSA-N	O=C1OC(C=CC2=CC=C(OC)C=C2)=CC(OC)=C1	2.5686	0.0058524	1.67259
972	Positive	16.135	337.322	Unknown	[M+H]+	null	null	null	null	9.0813	0.0058524	1.27493
973	Positive	1.061	328.958	Unknown	[M+H]+	null	null	null	null	3.6334	0.0058712	1.34625
974	Positive	12.046	445.152	low score: 6,8-Diprenylorobol	[M+H-H2O]+	C25H26O6	6-prenylated isoflavanones	OAUIRSVJXOFAOO-UHFFFAOYSA-N	O=C1C(=COC2=C1C(O)=C(C(O)=C2CC=C(C)C)CC=C(C)C)C=3C=CC(O)=C(O)C3	3.303	0.0058934	1.3449
975	Positive	11.477	808.623	Unknown	[M+H]+	null	null	null	null	9.2439	0.0059137	1.245
976	Positive	11.708	402.428	Unknown	[M+H]+	null	null	null	null	0.41494	0.0059139	1.66189
977	Positive	8.348	288.279	low score: C17-Sphinganine	[M+H]+	C17H37NO2	1,2-aminoalcohols	KFQUQCFJDMSIJF-UHFFFAOYSA-N	CCCCCCCCCCCCCCC(C(CO)N)O	0.44083	0.0059155	1.5674
978	Positive	14.536	796.682	Unknown	[M+H]+	null	null	null	null	0.41913	0.0059295	1.64522
979	Positive	6.728	383.3	low score: Geranylgeranyl 1,4-hydroquinone	[M+H]+	C26H38O2	Diterpenoids	FIPAQYYZFDCRDD-FPFQZNTGSA-N	OC1=C(C/C=C(CC/C=C(C)/CC/C=C(C)/CC/C=C(C)\C)\C)C=C(O)C=C1	0.44238	0.0059376	1.69159
980	Positive	0.62	116.986	Unknown	[M+H]+	null	null	null	null	37.904	0.0059626	1.54857
981	Positive	19.874	419.354	low score: "(3R,5S,7R,9S,10S,12S,13R,14S,17R)-17-((2R)-7-hydroxy-6-methylheptan-2-yl)-10,13-dimethylhexadecahydro-1H-cyclopenta[a]phenanthrene-3,7,12-triol"	[M-H2O+H]+	C27H48O4	Tetrahydroxy bile acids, alcohols and derivatives	XJZGNVBLVFOSKJ-XZULNKEGSA-N	C[C@H](CCCC(C)CO)[C@H]1CC[C@H]2[C@]3([H])[C@H](O)C[C@@H]4C[C@H](O)CC[C@]4(C)[C@H]3C[C@H](O)[C@@]21C	0.42912	0.0059626	1.75058
982	Positive	13.352	239.259	Unknown	[M+H]+	null	null	null	null	0.40863	0.0059626	1.49655
983	Positive	1.645	307.608	Unknown	[M+H]+	null	null	null	null	4.4991	0.0059626	1.15027
984	Positive	9.73	634.412	Unknown	[M+H]+	null	null	null	null	11.388	0.0059626	1.34774
985	Positive	10.487	522.386	no MS2: MADECASSIC ACID_major	[M+NH4]+	C30H48O6	Triterpenoids	PRAUVHZJPXOEIF-AOLYGAPISA-N	CC1CCC2(C(=O)O)CCC3(C)C(=CCC4C5(C)CC(O)C(O)C(C)(CO)C5C(O)CC43C)C2C1C	2.7081	0.0059626	1.07927
986	Negative	10.636	692.337	Unknown	[M-H]-	null	null	null	null	4.1718	0.0059626	1.06907
987	Positive	8.024	268.178	low score: brevicarine	[M+H]+	C17H21N3	Harmala alkaloids	OMGIBPZQATWNBX-UHFFFAOYSA-N	N=1C=C(C=2C=3C=CC=CC3NC2C1C)CCCCNC	0.43891	0.0059768	1.71748
988	Positive	8.124	486.313	low score: "N-((4R)-4-((3R,5S,7S,9S,10S,13R,14S,17R)-3,7-dihydroxy-10,13-dimethylhexadecahydro-1H-cyclopenta[a]phenanthren-17-yl)pentanoyl)-N-methylglycine"	[M+H-2H2O]+	C27H45NO5	Glycinated bile acids and derivatives	YZYBIGOLMMAZFK-IMLYGNJHSA-N	C[C@H](CCC(N(CC(O)=O)C)=O)[C@H]1CC[C@H]2[C@]([C@@H]3CC[C@@]21C)([H])[C@@H](O)C[C@@]4([H])[C@]3(C)CC[C@@H](O)C4	0.42665	0.0059768	1.33656
989	Positive	12.016	556.493	Unknown	[M+H]+	null	null	null	null	0.44245	0.0059779	1.6856
990	Positive	0.685	114.975	Unknown	[M+H]+	null	null	null	null	6.919	0.0059894	1.45522
991	Positive	11.141	608.437	Unknown	[M+H]+	null	null	null	null	21.982	0.0059973	1.19959
992	Positive	18.163	338.37	Unknown	[M+H]+	null	null	null	null	2.1536	0.0059973	1.41702
993	Positive	8.809	602.445	Unknown	[M+H]+	null	null	null	null	0.44154	0.0059973	1.39696
994	Positive	0.378	784.649	Unknown	[M+H]+	null	null	null	null	0.37895	0.0059973	1.3753
995	Positive	10.335	520.319	Unknown	[M+H]+	null	null	null	null	6.9604	0.0060004	0.948251
996	Positive	12.822	552.449	Unknown	[M+H]+	null	null	null	null	0.42197	0.0060123	1.57672
997	Positive	9.032	497.237	Unknown	[M+H]+	null	null	null	null	7.7	0.0060123	1.40696
998	Negative	0.445	640.125	Unknown	[M-H]-	null	null	null	null	0.11501	0.0060123	1.32696
999	Positive	0.621	154.978	Unknown	[M+H]+	null	null	null	null	9.0606	0.0060199	1.57772
1000	Positive	1.653	281.072	low score: phebalosin	[M+Na]+	C15H14O4	Coumarins and derivatives	YTDNHMHONBWCBV-UKRRQHHQSA-N	O=C1OC2=C(C=C1)C=CC(OC)=C2C3OC3C(=C)C	2.532	0.0060199	1.66469
1001	Positive	12.227	856.629	Unknown	[M+H]+	null	null	null	null	5.3161	0.0060276	1.04743
1002	Positive	8.324	324.247	low score: Melophlin B/C/G/K/L/N/O	[M+H]+	C19H33NO3	N-alkylpyrrolidines	WBPPODSRZVXVJK-MSUUIHNZSA-N	CCCCCCCCCCCC/C(O)=C(C1=O)\C(C(N1C)C)=O	0.44418	0.0060291	1.59629
1003	Positive	6.536	414.297	low score: glycoursodeoxycholic acid	[M-2H2O+H]+	C26H43NO5	Glycinated bile acids and derivatives	GHCZAUBVMUEKKP-WTFVBUONSA-N	C[C@H](CCC(=O)NCC(=O)O)[C@H]1CC[C@@H]2[C@@]1(CC[C@H]3[C@H]2[C@H](C[C@H]4[C@@]3(CC[C@H](C4)O)C)O)C	3.956	0.0060291	1.50174
1004	Positive	12.32	832.628	Unknown	[M+H]+	null	null	null	null	2.6787	0.0060291	1.25593
1005	Positive	0.291	519.175	no MS2: [(2S,3S,4R,5R)-4-hydroxy-2,5-bis(hydroxymethyl)-2-[(2R,3R,4S,5S,6R)-3,4,5-trihydroxy-6-(hydroxymethyl)oxan-2-yl]oxyoxolan-3-yl] (E)-3-(4-hydroxy-3-methoxyphenyl)prop-2-enoate	[M+H]+	C22H30O14	Coumaric acids and derivatives	ZPEADZHVGOCGKH-YQTDNFGYSA-N	O=C(OC1C(O)C(OC1(OC2OC(CO)C(O)C(O)C2O)CO)CO)C=CC3=CC=C(O)C(OC)=C3	61.995	0.0060437	1.47263
1006	Positive	14.653	297.104	low score: Gigantol	[M+Na]+	C16H18O4	Stilbenes	SDXKZPQOVUDXIY-UHFFFAOYSA-N	OC=1C=C(OC)C=C(C1)CCC2=CC=C(OC)C(O)=C2	2.2375	0.0060537	1.53776
1007	Positive	7.693	449.355	Unknown	[M+H]+	null	null	null	null	7.8617	0.0061018	1.2476
1008	Positive	6.521	479.277	low score: Schweinfurthin F	[M+Na]+	C30H38O5	Xanthenes	BUFNPAYKUGAAAO-CMDGGOBGSA-N	COC1=CC(/C=C/C2=CC(O)=C(C(O)=C2)C/C=C(C)\C)=CC3=C1OC4(CCC(C(C)(C4C3)C)O)C	22.141	0.0061122	1.46717
1009	Positive	17.776	376.331	low score: N-(3-Methoxybenzyl)palmitamide	[M+H]+	C24H41NO2	Anisoles	FIQGQTITXPTKIY-UHFFFAOYSA-N	O=C(NCC=1C=CC=C(OC)C1)CCCCCCCCCCCCCCC	0.40786	0.0061399	1.54923
1010	Positive	6.033	275.13	low score: Heteropeucenin, Methyl Ether	[M+Na]+	C16H18O4	Chromones	KVNRDSLYCOJCRD-UHFFFAOYSA-N	O=C1C=C(OC=2C1=C(O)C=C(OC)C2CC=C(C)C)C	6.0416	0.0061399	1.24701
1011	Positive	17.947	409.369	low score: cholest-5-en-3-ol	[M+Na]+	C27H46O	Cholesterols and derivatives	HVYWMOMLDIMFJA-RQOOZVDESA-N	OC1CC2=CCC3C(CCC4(C)C(CCC34)C(C)CCCC(C)C)C2(C)CC1	0.38928	0.0061399	1.42993
1012	Positive	18.982	521.423	Unknown	[M+H]+	null	null	null	null	0.44499	0.0061503	1.50744
1013	Positive	10.149	369.377	low score: tetracosanoic acid	[M+H]+	C24H48O2	Very long-chain fatty acids	QZZGJDVWLFXDLK-UHFFFAOYSA-N	O=C(O)CCCCCCCCCCCCCCCCCCCCCCC	5.8073	0.0061558	1.18568
1014	Positive	13.349	683.606	Unknown	[M+H]+	null	null	null	null	0.40493	0.006169	1.57192
1015	Positive	11.333	285.269	low score: h_58_bolasterone-m	[M-2H2O+H]+	C21H36O2	Androgens and derivatives	ZWQUPIDNCOVROC-HEEAJRSSSA-N	C[C@]1(O)CC[C@@H]2[C@]1(C)CC[C@H]3[C@H]2[C@H](C)C[C@@]4([H])[C@]3(C)CC[C@@H](O)C4	0.38264	0.006169	1.26091
1016	Positive	9.161	573.341	no MS2: 5',6a,8a,9-tetramethyldocosahydrospiro[naphtho[2',1':4,5]indeno[2,1-b]furan-10,2'-pyran]-4-yl 4-methoxybenzoate	[M+Na]+	C35H50O5	Triterpenoids	HSPBTZRUYDLHGR-UHFFFAOYSA-N	O=C(OC1CCC2(C)C(CCC3C2CCC4(C)C3CC5OC6(OCC(C)CC6)C(C)C54)C1)C7=CC=C(OC)C=C7	16.333	0.0061746	1.27433
1017	Positive	1.282	243.042	no MS2: NCGC00385961-01_C11H11ClO4_1H-2-Benzopyran-1-one, 5-chloro-3,4-dihydro-8-hydroxy-6-methoxy-3-methyl-	[M+H]+	C11H11ClO4	2-benzopyrans	WLUQQWRUOSZKGN-UHFFFAOYSA-N	COC1=CC(=C2C(=O)OC(C)CC2=C1Cl)O	3.6189	0.0061796	0.986291
1018	Positive	13.791	357.332	low score: conessine	[M+H]+	C24H40N2	Conanine-type alkaloids	GPLGAQQQNWMVMM-CYFNKAHPSA-N	C1=C2CC(N(C)C)CCC2(C)C3CCC45CN(C)C(C)C5CCC4C3C1	0.38679	0.0062059	1.62683
1019	Positive	8.692	590.37	Unknown	[M+H]+	null	null	null	null	0.4222	0.0062059	1.45237
1020	Positive	14.307	816.631	Unknown	[M+H]+	null	null	null	null	2.5313	0.0062512	1.13021
1021	Positive	9.146	281.073	low score: Yangonin	[M+Na]+	C15H14O4	Kavalactones	XLHIYUYCSMZCCC-VMPITWQZSA-N	O=C1OC(C=CC2=CC=C(OC)C=C2)=CC(OC)=C1	2.1483	0.0062843	1.56142
1022	Positive	6.301	297.105	no MS2: NCGC00180099-02!methyl 2-[(3-formamido-2-hydroxybenzoyl)amino]-3-hydroxybutanoate	[M+H]+	C13H16N2O6	Acylaminobenzoic acid and derivatives	FKDSAXOHMLWBNA-UHFFFAOYSA-N	COC(=O)C(NC(=O)C1=C(O)C(NC=O)=CC=C1)C(C)O	2.2442	0.0063272	1.70706
1023	Positive	1.183	462.308	low score: echinulin	[M+H]+	C29H39N3O2	Alpha amino acids and derivatives	DIKMWTRJIZQJMY-CYFREDJKSA-N	C=CC(C)(C1=C(C2=CC(C/C=C(C)\C)=CC(C/C=C(C)\C)=C2N1)C[C@@](N3)([H])C(N[C@H](C3=O)C)=O)C	0.0093976	0.0063272	1.21948
1024	Positive	13.352	348.343	Unknown	[M+H]+	null	null	null	null	0.40887	0.0063357	1.55045
1025	Positive	9.53	380.38	Unknown	[M+H]+	null	null	null	null	0.46574	0.0063357	1.33651
1026	Negative	8.99	993.58	Unknown	[M-H]-	null	null	null	null	0.14066	0.0063357	1.24244
1027	Positive	11.335	303.283	low score: h_58_bolasterone-m	[M+H-H2O]+	C21H36O2	Androgens and derivatives	ZWQUPIDNCOVROC-HEEAJRSSSA-N	C[C@]1(O)CC[C@@H]2[C@]1(C)CC[C@H]3[C@H]2[C@H](C)C[C@@]4([H])[C@]3(C)CC[C@@H](O)C4	0.37986	0.0063622	1.22514
1028	Positive	1.599	299.101	low score: Amlexanox	[M+H]+	C16H14N2O4	Chromeno[2,3-b]pyridine-5-ones	SGRYPYWGNKJSDL-UHFFFAOYSA-N	O=C(O)C1=CC=2C(=O)C3=CC(=CC=C3OC2N=C1N)C(C)C	2.1949	0.0063723	1.56473
1029	Positive	18.312	576.534	Unknown	[M+H]+	null	null	null	null	0.42191	0.0063908	1.62385
1030	Positive	8.701	568.38	Unknown	[M+H]+	null	null	null	null	0.42174	0.0063935	1.51765
1031	Positive	6.625	398.269	low score: Phytosphingosine-1-P	[M+H]+	C18H40NO6P	Phosphosphingolipids	AYGOSKULTISFCW-KZNAEPCWSA-N	CCCCCCCCCCCCCC[C@H]([C@@H]([C@@H](COP(=O)(O)O)N)O)O	2.3115	0.006416	1.44537
1032	Positive	1.159	370.855	Unknown	[M+H]+	null	null	null	null	4.8358	0.006416	1.23583
1033	Positive	11.606	824.625	Unknown	[M+H]+	null	null	null	null	28.968	0.0064647	1.62716
1034	Positive	1.099	273.186	no MS2: h_92_oxabolone	[M-H2O+H]+	C18H26O3	Estrogens and derivatives	GXHBCWCMYVTJOW-DNBWYCQVSA-N	O[C@H]1CCC2C3CCC4=C(O)C(CCC4C3CC[C@@]21C)=O	3.5309	0.0064693	1.54562
1035	Positive	11.41	678.517	low score: phosphatidylethanolamine (15:0/16:0)	[M+H]+	C36H72NO8P	Phosphatidylethanolamines	DCIHLTIBNFDPMW-UUWRZZSWSA-N	[H][C@@](COP(O)(OCCN)=O)(OC(CCCCCCCCCCCCCCC)=O)COC(CCCCCCCCCCCCCC)=O	2.0669	0.0065112	1.44999
1036	Positive	1.186	533.37	low score: Alisol A,24-acetate	[M+H]+	C32H52O6	Triterpenoids	WXHUQVMHWUQNTG-JSWHPQHOSA-N	O=C(OC(C(O)CC(C1=C2CC(O)C3C4(C)CCC(=O)C(C)(C)C4CCC3(C)C2(C)CC1)C)C(O)(C)C)C	0.0050865	0.0065523	1.31232
1037	Positive	9.065	570.407	low score: "(4R)-4-((3R,5S,7R,9S,10S,13R,14S,17R)-3,7-dihydroxy-10,13-dimethylhexadecahydro-1H-cyclopenta[a]phenanthren-17-yl)-N-methyl-N-((2S,3R,4R,5R)-2,3,4,5,6-pentahydroxyhexyl)pentanamide"	[M+H]+	C31H55NO8	Dihydroxy bile acids, alcohols and derivatives	KUXSAFRZQPYINU-SGWAQUIASA-N	C[C@H](CCC(N(C)C[C@H](O)[C@@H](O)[C@@H]([C@@H](CO)O)O)=O)[C@H]1CC[C@H]2[C@]3([H])[C@H](O)C[C@@H]4C[C@H](O)CC[C@]4(C)[C@H]3CC[C@@]21C	0.44995	0.0065523	1.36533
1038	Positive	1.022	448.957	Unknown	[M+H]+	null	null	null	null	0.45071	0.0065606	1.36554
1039	Positive	5.886	247.185	low score: Sophocarpine	[M+H]+	C15H22N2O	Matrine alkaloids	AAGFPTSOPGCENQ-JLNYLFASSA-N	C1C[C@H]2CN3[C@H](CC=CC3=O)[C@@H]4[C@H]2N(C1)CCC4	14.834	0.0066045	1.64035
1040	Positive	13.484	301.162	low score: 1-[4,5-bis(hydroxymethyl)-3-methoxy-2-methylphenoxy]-3-methylbutane-2,3-diol	[M+H]+	C15H24O6	Benzyl alcohols	MAQMWSUGBCIGLJ-UHFFFAOYSA-N	OCC1=CC(OCC(O)C(O)(C)C)=C(C(OC)=C1CO)C	2.0731	0.0066045	1.39493
1041	Positive	14.314	447.149	no MS2: Daphylloside	[M+H]+	C19H26O12	Iridoid O-glycosides	YSOBQIMODQOGKQ-HOZAMIDDSA-N	O=C(OC)C1=COC(OC2OC(CO)C(O)C(O)C2O)C3C(=CC(O)C13)COC(=O)C	6.0514	0.0066057	1.25865
1042	Positive	6.21	492.337	Unknown	[M+H]+	null	null	null	null	2.3032	0.0066176	1.34022
1043	Positive	1.146	215.139	no MS2: NCGC00180357-02_C15H20O2_2(4aH)-Naphthalenone, 5,6,7,8-tetrahydro-6-hydroxy-4a,5-dimethyl-3-(1-methylethenyl)-, (4aR,5R,6R)-	[M-H2O+H]+	C15H20O2	Eremophilane, 8,9-secoeremophilane and furoeremophilane sesquiterpenoids	MMDLQPKGJNEWIM-PSOPSSQASA-N	C[C@H]1[C@H](O)CC\C2=C\C(=O)\C(=C/[C@]12C)C(C)=C	2.969	0.0066296	1.4399
1044	Positive	11.412	510.436	Unknown	[M+H]+	null	null	null	null	0.43354	0.0066296	1.58427
1045	Positive	11.656	372.338	low score: NCGC00380102-01!3-hexadecyl-4-methoxy-5-methyloxolan-2-one	[M+NH4]+	C22H42O3	Gamma butyrolactones	DJNFXUFERDZHCD-UHFFFAOYSA-N	CCCCCCCCCCCCCCCCC1C(OC)C(C)OC1=O	14.405	0.0066296	1.38463
1046	Positive	6.515	375.224	low score: 6a_Methylprednisolone	[M+H]+	C22H30O5	21-hydroxysteroids	VHRSUDSXCMQTMA-UHFFFAOYSA-N	[H]OC([H])([H])C(=O)C(O[H])(C([H])([H])4)C(C([H])([H])[H])(C([H])([H])3)C([H])(C([H])([H])4)C([H])(C([H])([H])1)C([H])(C([H])(O[H])3)C(C([H])=2)(C([H])([H])[H])C(=C([H])C(=O)C([H])2)C([H])(C([H])([H])[H])1	23.5	0.0066296	1.25837
1047	Positive	1.102	512.842	Unknown	[M+H]+	null	null	null	null	4.0992	0.0066296	1.17911
1048	Positive	11.442	636.472	Unknown	[M+H]+	null	null	null	null	5.4083	0.0066296	0.948899
1049	Positive	11.051	324.247	low score: Melophlin B/C/G/K/L/N/O	[M+H]+	C19H33NO3	N-alkylpyrrolidines	WBPPODSRZVXVJK-MSUUIHNZSA-N	CCCCCCCCCCCC/C(O)=C(C1=O)\C(C(N1C)C)=O	0.43829	0.0066301	1.7092
1050	Positive	6.768	427.28	low score: "methyl (4R,E)-4-((3R,5S,7S,9S,10S,13R,14S,17R)-3,7-dihydroxy-10,13-dimethylhexadecahydro-1H-cyclopenta[a]phenanthren-17-yl)pent-2-enoate"	[M+Na]+	C25H40O4	7-alpha-hydroxysteroids	AJOPHDUNANPFKQ-VEEBWJHKSA-N	C[C@H](/C=C/C(OC)=O)[C@H]1CC[C@H]2[C@]([C@@H]3CC[C@@]21C)([H])[C@@H](O)C[C@H]4[C@]3(C)CC[C@@H](O)C4	2.9796	0.0066472	1.20136
1051	Positive	2.257	100.075	N-Methyl-2-pyrrolidone	[M+H]+	C5H9NO	N-alkylpyrrolidines	SECXISVLQFMRJM-UHFFFAOYSA-N	CN1CCCC1=O	9.5192	0.0066494	1.62614
1052	Positive	17.466	780.613	Unknown	[M+H]+	null	null	null	null	0.41157	0.0066494	1.62487
1053	Positive	9.275	808.552	Unknown	[M+H]+	null	null	null	null	0.42885	0.0066842	1.31419
1054	Negative	1.274	512.242	Unknown	[M-H]-	null	null	null	null	0.021335	0.0066928	1.30585
1055	Negative	1.094	814.069	no MS2: PFSM-ammonio; [C19H22F19N2O7S2]+	[M-H]-	C19H22F19N2O7S2	Alpha amino acids and derivatives	JTWANVFSBSQELJ-UHFFFAOYSA-O	O=C(O)CN(CCC[N+](C)(C)CCCS(=O)(=O)O)S(=O)(=O)C(F)(F)C(F)(F)C(F)(F)C(F)(F)C(F)(F)C(F)(F)C(F)(F)C(F)(F)C(F)(F)F	0.24041	0.0067405	1.19226
1056	Positive	0.628	166.909	Unknown	[M+H]+	null	null	null	null	50.001	0.0067467	1.56856
1057	Positive	19.351	722.573	Unknown	[M+H]+	null	null	null	null	0.49983	0.0067467	1.38562
1058	Positive	1.156	555.354	low score: Alisol A,24-acetate	[M+ACN+H]+	C32H52O6	Triterpenoids	WXHUQVMHWUQNTG-JSWHPQHOSA-N	O=C(OC(C(O)CC(C1=C2CC(O)C3C4(C)CCC(=O)C(C)(C)C4CCC3(C)C2(C)CC1)C)C(O)(C)C)C	0.0079078	0.0067467	1.26565
1059	Negative	9.745	770.403	Unknown	[M-H]-	null	null	null	null	2.3523	0.0067467	1.03083
1060	Positive	8.316	380.284	Unknown	[M+H]+	null	null	null	null	15.759	0.0067486	1.14585
1061	Positive	6.475	325.249	Unknown	[M+H]+	null	null	null	null	0.4962	0.0067618	1.55742
1062	Positive	1.136	304.996	Unknown	[M+H]+	null	null	null	null	4.576	0.0067635	1.14312
1063	Positive	7.117	452.372	Unknown	[M+H]+	null	null	null	null	0.42277	0.0067664	1.05887
1064	Negative	1.139	879.971	Unknown	[M-H]-	null	null	null	null	0.16918	0.0067676	1.11074
1065	Positive	8.691	502.335	low score: (2R,3S,4S,5S,6R)-2-[[7-hydroxy-4-[(Z)-5-hydroxy-3-methylpent-3-enyl]-4a,8,8-trimethyl-3-methylidene-2,4,5,6,7,8a-hexahydro-1H-naphthalen-2-yl]oxy]-6-(hydroxymethyl)oxane-3,4,5-triol	[M+NH4]+	C26H44O8	Diterpene glycosides	JECOCDKQCZSANH-RFKAOMIISA-N	OCC=C(C)CCC1C(=C)C(OC2OC(CO)C(O)C(O)C2O)CC3C(C)(C)C(O)CCC13C	0.42832	0.0067686	1.46766
1066	Positive	8.761	519.362	no MS2: "(3R,5R,7R,8S,9S,10S,12S,13R,14S,17R)-12-hydroxy-10,13-dimethyl-17-((R)-5-(oxetan-3-yl)pentan-2-yl)hexadecahydro-1H-cyclopenta[a]phenanthrene-3,7-diyl diacetate"	[M+H]+	C31H50O6	Cholestane steroids	PWKMCTSCOMHDIZ-BFFUGBCUSA-N	C[C@@H]([C@H]1CC[C@]2([H])[C@]1(C)[C@@H](O)C[C@@]3([H])[C@]2([H])[C@H](OC(C)=O)C[C@]4([H])[C@]3(C)CC[C@@H](OC(C)=O)C4)CCCC5COC5	6.1676	0.0067803	1.33448
1067	Positive	1.246	526.414	Unknown	[M+H]+	null	null	null	null	0.40312	0.0067908	1.46365
1068	Positive	13.354	714.67	Unknown	[M+H]+	null	null	null	null	0.44086	0.0068209	1.64343
1069	Negative	1.257	682.278	Unknown	[M-H]-	null	null	null	null	0.044505	0.0068265	1.19461
1070	Positive	0.476	105.935	Unknown	[M+H]+	null	null	null	null	53.523	0.0068348	1.3365
1071	Positive	6.349	310.246	low score: Dihydoroferuloyl Octylamine	[M+H]+	C18H31NO3	Methoxyphenols	HNHHAOUUFVYDEW-UHFFFAOYSA-N	CCCCCCCCNC(O)CCC1=CC(OC)=C(O)C=C1	2.5932	0.0068348	1.53533
1072	Positive	18.979	516.471	Unknown	[M+H]+	null	null	null	null	0.43433	0.0068348	1.5132
1073	Negative	7.658	532.28	Unknown	[M-H]-	null	null	null	null	0.19766	0.0068348	1.14695
1074	Negative	1.035	650.231	Unknown	[M-H]-	null	null	null	null	0.044791	0.0068348	1.23951
1075	Positive	16.479	297.104	no MS2: OCP_297.1002_16.5	[M+H]+	C14H17ClN2O3	Phenylpiperazines	FMKKWAHJJLLAOW-UHFFFAOYSA-N	OC(=O)CCC(=O)N1CCN(CC1)c1ccccc1Cl	3.4412	0.0068483	1.63899
1076	Positive	12.402	221.168	low score: Prilocaine	[M+H]+	C13H20N2O	Alpha amino acid amides	MVFGUOIZUNYYSO-UHFFFAOYSA-N	C1=CC=CC(=C1C)NC(C(NCCC)C)=O	2.7062	0.0068483	1.52429
1077	Positive	17.475	445.149	no MS2: Piptocarphin A	[M+Na]+	C21H26O9	Tricarboxylic acids and derivatives	BZQDHZDSIXPDSS-CYDVCVIESA-N	O=C1C(COC(C)=O)=C2[C@@H](OC(C(C)=C)=O)C[C@@](C)(O)[C@@](O)(O3)CC[C@]3(C)/C=C2/O1	12.636	0.0068483	1.34387
1078	Positive	1.136	546.942	Unknown	[M+H]+	null	null	null	null	4.8897	0.0068483	1.28494
1079	Positive	15.302	281.071	low score: Yangonin	[M+Na]+	C15H14O4	Kavalactones	XLHIYUYCSMZCCC-VMPITWQZSA-N	O=C1OC(C=CC2=CC=C(OC)C=C2)=CC(OC)=C1	2.8322	0.0068686	1.64922
1080	Positive	10.171	546.391	Unknown	[M+H]+	null	null	null	null	10.633	0.0068707	1.40504
1081	Positive	7.766	261.136	low score: Diaveridine	[M+H]+	C13H16N4O2	Dimethoxybenzenes	LDBTVAXGKYIFHO-UHFFFAOYSA-N	COC1=C(C=C(C=C1)CC2=CN=C(N=C2N)N)OC	0.48988	0.0068841	1.52001
1082	Positive	1.19	220.067	no MS2: methyl 2-(2-amino-4-hydroxy-6-methylpyrimidin-5-yl)acetate	[M+Na]+	C8H11N3O3	Pyrimidones	FMZPNXDUADVAFG-UHFFFAOYSA-N	O=C(OC)CC1=C(O)N=C(N=C1C)N	2.4155	0.0068841	1.26169
1083	Positive	6.254	474.325	Unknown	[M+H]+	null	null	null	null	7.0404	0.0069136	1.51729
1084	Positive	1.045	286.969	Unknown	[M+H]+	null	null	null	null	10.118	0.0069136	1.37907
1085	Negative	1.172	752.07	Unknown	[M-H]-	null	null	null	null	0.15376	0.0069136	1.07991
1086	Positive	9.149	692.461	Unknown	[M+H]+	null	null	null	null	13.978	0.0069256	1.23685
1087	Positive	15.766	391.312	Octyl-3,5-di-tert-butyl-4-hydroxyhydrocinnamate	[M+H]+	C25H42O3	Fatty alcohol esters	CFXCGWWYIDZIMU-UHFFFAOYSA-N	CCCCCCCCOC(=O)CCC1=CC(=C(O)C(=C1)C(C)(C)C)C(C)(C)C	2.7162	0.0069389	1.47906
1088	Positive	6.429	481.293	low score: 6-oxopristimerol	[M+H]+	C30H40O5	Phenanthrenes and derivatives	QHONUEZGTQYXKH-GOSHRYQWSA-N	OC(C(O)=C1)=C(C)C2=C1[C@@]3(C)C([C@](CC[C@]4(C)C5C[C@](C)(C(OC)=O)CC4)(C)[C@@]5(C)CC3)=CC2=O	19.347	0.0069389	1.29782
1089	Negative	1.026	834.119	Unknown	[M-H]-	null	null	null	null	0.26283	0.0069535	1.07241
1090	Positive	11.26	830.61	Unknown	[M+H]+	null	null	null	null	14.017	0.0069981	1.08669
1091	Positive	1.11	644.729	Unknown	[M+H]+	null	null	null	null	10.356	0.007015	1.1612
1092	Positive	1.26	423.077	no MS2: 3-(4-chlorophenyl)-5-hydroxy-10-(1-methyl-1H-pyrazol-4-yl)-9,10-dihydropyrano[2,3-f]chromene-4,8-dione	[M+H]+	C22H15ClN2O5	Pyranoisoflavonoids	MVLZRHJIQUMZRO-UHFFFAOYSA-N	O=C1OC2=CC(O)=C3C(=O)C(=COC3=C2C(C=4C=NN(C4)C)C1)C=5C=CC(Cl)=CC5	26.668	0.0070381	1.46744
1093	Positive	1.082	500.935	Unknown	[M+H]+	null	null	null	null	7.1168	0.0070524	1.21195
1094	Positive	1.12	792.162	Unknown	[M+H]+	null	null	null	null	0.018769	0.0070524	1.19266
1095	Positive	0.189	519.172	no MS2: [(2S,3S,4R,5R)-4-hydroxy-2,5-bis(hydroxymethyl)-2-[(2R,3R,4S,5S,6R)-3,4,5-trihydroxy-6-(hydroxymethyl)oxan-2-yl]oxyoxolan-3-yl] (E)-3-(4-hydroxy-3-methoxyphenyl)prop-2-enoate	[M+H]+	C22H30O14	Coumaric acids and derivatives	ZPEADZHVGOCGKH-YQTDNFGYSA-N	O=C(OC1C(O)C(OC1(OC2OC(CO)C(O)C(O)C2O)CO)CO)C=CC3=CC=C(O)C(OC)=C3	74.404	0.0070727	1.47764
1096	Positive	1.745	113.962	Unknown	[M+H]+	null	null	null	null	5.0494	0.0070839	1.55798
1097	Positive	7.328	353.172	low score: meso-dihydroguaiaretic acid	[M+Na]+	C20H26O4	Dibenzylbutane lignans	ADFOLUXMYYCTRR-ZIAGYGMSSA-N	OC1=CC=C(C=C1OC)CC(C)C(C)CC2=CC=C(O)C(OC)=C2	11.532	0.0070862	1.19623
1098	Positive	9.65	560.364	low score: NCGC00381175-01!3-hydroxy-2-[[3-[3-(3-hydroxy-6-methylheptanoyl)oxy-6-methylheptanoyl]oxy-8-methylnonanoyl]amino]propanoic acid	[M+H]+	C29H53NO9	N-acyl-alpha amino acids	MWZPHNZNPKKSEI-UHFFFAOYSA-N	CC(C)CCCCC(CC(=O)NC(CO)C(O)=O)OC(=O)CC(CCC(C)C)OC(=O)CC(O)CCC(C)C	0.42234	0.0070873	1.53143
1099	Positive	6.255	446.29	Unknown	[M+H]+	null	null	null	null	2.8691	0.0070873	1.17611
1100	Positive	1.893	193.944	Unknown	[M+H]+	null	null	null	null	28.133	0.0071233	1.55766
1101	Positive	14.122	698.557	Unknown	[M+H]+	null	null	null	null	0.35496	0.0071443	1.61226
1102	Positive	9.883	430.418	Unknown	[M+H]+	null	null	null	null	3.6918	0.0072245	1.05141
1103	Positive	1.283	533.364	low score: Dehydroeburicoic acid monoacetate	[M+Na]+	C33H50O4	Triterpenoids	AYHCPTDPDUADTK-UHFFFAOYSA-N	O=C(OC1CCC2(C3=CCC4(C)C(CCC4(C3=CCC2C1(C)C)C)C(C(=O)O)CCC(=C)C(C)C)C)C	0.011221	0.0072378	1.26925
1104	Negative	7.106	481.18	low score: 11-(6-{[2-(3,4-dimethoxyphenyl)ethyl]amino}-4-chloro-1,3,5-triazin-2-yl)-7,11- diazatricyclo[7.3.1.0<2,7>]trideca-2,4-dien-6-one	[M-H]-	C24H27ClN6O3	Cytisine and derivatives	DRVRFMGQMHIZLI-UHFFFAOYSA-N	COC1=C(C=C(C=C1)CCNC2=NC(=NC(=N2)N3CC4CC(C3)C5=CC=CC(=O)N5C4)Cl)OC	0.1638	0.0072479	1.36781
1105	Positive	12.09	570.498	Unknown	[M+H]+	null	null	null	null	3.104	0.0072509	1.39313
1106	Positive	14.422	367.313	low score: Batyl Alcohol	[M+Na]+	C21H44O3	Monoalkylglycerols	OGBUMNBNEWYMNJ-UHFFFAOYSA-N	OCC(O)COCCCCCCCCCCCCCCCCCC	0.49596	0.0072532	1.13107
1107	Positive	8.06	274.299	Unknown	[M+H]+	null	null	null	null	0.44204	0.0072765	1.62521
1108	Positive	14.295	811.571	Unknown	[M+H]+	null	null	null	null	24.066	0.0072765	1.13776
1109	Positive	0.697	307.099	low score: NCGC00142553-05!5,7-dimethoxy-2-phenyl-2,3-dihydrochromen-4-one [IIN-based on: CCMSLIB00000848562]	[M+Na]+	C17H16O4	7-O-methylated flavonoids	IAFBOKYTDSDNHV-UHFFFAOYSA-N	COC1=CC2=C(C(=O)CC(O2)C3=CC=CC=C3)C(OC)=C1	35.657	0.0072838	1.34813
1110	Positive	0.747	237.966	Unknown	[M+H]+	null	null	null	null	0.48003	0.0072921	1.59401
1111	Positive	14.841	281.072	low score: Sulfamethoxypyridazine	[M+H]+	C11H12N4O3S	Aminobenzenesulfonamides	VLYWMPOKSSWJAL-UHFFFAOYSA-N	COc1ccc(nn1)NS(=O)(=O)c2ccc(cc2)N	2.3202	0.0073074	1.64209
1112	Positive	15.602	281.071	no MS2: Sulfameter (Bayrena)	[M+H]+	C11H12N4O3S	Aminobenzenesulfonamides	GPTONYMQFTZPKC-UHFFFAOYSA-N	C1(=CC=C(C=C1)S(NC2=NC=C(C=N2)OC)(=O)=O)N	3.1795	0.0073085	1.61098
1113	Positive	1.502	308.112	no MS2: Tolnaftate	[M+H]+	C19H17NOS	Naphthalenes	FUSNMLFNXJSCDI-UHFFFAOYSA-N	C1(N(C(OC2=CC=C3C(=C2)C=CC=C3)=S)C)=CC(=CC=C1)C	4.7619	0.007321	1.25044
1114	Positive	9.592	438.34	low score: tomatidine	[M+Na]+	C27H45NO2	Spirosolanes and derivatives	XYNPYHXGMWJBLV-JYAGXCGRSA-N	OC1CCC2(C)C(CCC3C2CCC4(C)C3CC5OC6(NCC(C)CC6)C(C)C54)C1	0.41942	0.007321	1.14792
1115	Positive	5.936	230.156	Unknown	[M+H]+	null	null	null	null	60.917	0.0073487	1.62311
1116	Positive	0.793	201.022	low score: Meglutol	[M+K]+	C6H10O5	Hydroxy fatty acids	NPOAOTPXWNWTSH-UHFFFAOYSA-N	O=C(O)CC(O)(C)CC(=O)O	12.133	0.0073719	1.18642
1117	Positive	6.112	372.258	low score: (2E,4E,12Z)-N-(2-methylpropyl)octadeca-2,4,12-trienamide	[M+K]+	C22H39NO	N-acyl amines	PCWWIOUZYOPZHT-VBUSEHTESA-N	OC(=NCC(C)C)C=CC=CCCCCCCC=CCCCCC	5.6364	0.0073719	1.36716
1118	Positive	8.697	566.613	Unknown	[M+H]+	null	null	null	null	0.44643	0.007372	1.51479
1119	Positive	0.441	151.949	Unknown	[M+H]+	null	null	null	null	29.261	0.0073776	1.41145
1120	Positive	15.89	550.664	Unknown	[M+H]+	null	null	null	null	5.815	0.0073776	1.2707
1121	Negative	1.31	554.286	Unknown	[M-H]-	null	null	null	null	0.086564	0.0073865	1.12673
1122	Positive	0.592	564.236	Unknown	[M+H]+	null	null	null	null	9.197	0.0073975	1.43253
1123	Positive	8.446	484.314	low score: Taurolithocholate	[M+H]+	C26H45NO5S	Taurinated bile acids and derivatives	QBYUNVOYXHFVKC-GBURMNQMSA-N	C[C@H](CC/C(=N/CCS(=O)(=O)O)/O)[C@H]1CC[C@@H]2[C@@]1(CC[C@H]3[C@H]2CC[C@H]4[C@@]3(CC[C@H](C4)O)C)C	10.821	0.007408	1.45248
1124	Positive	1.155	482.865	Unknown	[M+H]+	null	null	null	null	4.8905	0.007408	1.30968
1125	Negative	1.139	895.071	Unknown	[M-H]-	null	null	null	null	0.24509	0.0074278	1.11792
1126	Positive	15.512	784.648	Unknown	[M+H]+	null	null	null	null	0.43983	0.0074603	1.63477
1127	Negative	1.19	721.198	Unknown	[M-H]-	null	null	null	null	0.064649	0.0074603	1.25863
1128	Negative	1.162	822.004	Unknown	[M-H]-	null	null	null	null	0.12542	0.007513	0.997058
1129	Positive	9.813	204.153	Unknown	[M+H]+	null	null	null	null	6.9758	0.0075357	1.19597
1130	Positive	11.686	825.629	Unknown	[M+H]+	null	null	null	null	17.915	0.0075408	1.25858
1131	Positive	14.304	519.173	no MS2: 3,5-dihydroxy-2-(4-hydroxyphenyl)-8-(3-methylbut-2-en-1-yl)-7-(((2S,3R,4S,5S,6R)-3,4,5-trihydroxy-6-(hydroxymethyl)tetrahydro-2H-pyran-2-yl)oxy)chroman-4-one	[M+H]+	C26H30O11	Flavonoid-7-O-glycosides	GRDZTDZJQRPNCN-GHYODRBMSA-N	O=C1C2=C(O)C=C(OC3OC(CO)C(O)C(O)C3O)C(=C2OC(C4=CC=C(O)C=C4)C1O)CC=C(C)C	72.638	0.0075541	1.5298
1132	Positive	0.291	445.148	low score: (1R,3R,4S,6S,8R,9R,10S,11S)-9-(acetyloxy)-8-hydroxy-3,8-dimethyl-12-methylidene-7,13-dioxo-5,14-dioxatricyclo[9.3.0.0?,?]tetradecan-10-yl 2-methylprop-2-enoate_major	[M+Na]+	C21H26O9	Germacranolides and derivatives	BRBRVKOYZAMSBL-PXFMFDQNSA-N	C=C(C)C(=O)OC1C2C(=C)C(=O)OC2CC(C)C2OC2C(=O)C(C)(O)C1OC(C)=O	6.8062	0.0076621	1.32955
1133	Positive	10.128	532.433	Unknown	[M+H]+	null	null	null	null	0.39769	0.0076661	1.03508
1134	Positive	14.379	285.279	low score: stearic acid	[M+H]+	C18H36O2	Long-chain fatty acids	QIQXTHQIDYTFRH-UHFFFAOYSA-N	O=C(O)CCCCCCCCCCCCCCCCC	4.4976	0.0076697	0.921482
1135	Positive	17.675	824.652	Unknown	[M+H]+	null	null	null	null	0.3729	0.0076805	1.07126
1136	Positive	1.183	531.355	no MS2: 4,4,10,13,14-pentamethyl-17-(1,5,6-trihydroxy-6-methylheptan-2-yl)-2,3,5,6,7,11,12,15,16,17-decahydro-1H-cyclopenta[a]phenanthrene-2,3,12-triol_major	[M+Na]+	C30H52O6	Triterpenoids	YRXIDKUVBPMNRA-UHFFFAOYSA-N	CC(C)(O)C(O)CCC(CO)C1CCC2(C)C3=C(CC(O)C12C)C1(C)CC(O)C(O)C(C)(C)C1CC3	0.01031	0.0076841	1.23394
1137	Positive	8.468	488.335	Unknown	[M+H]+	null	null	null	null	10.064	0.0076841	1.00209
1138	Positive	1.305	371.124	low score: Ajugol	[M+ACN+Na]+	C15H24O9	Iridoid O-glycosides	VELYAQRXBJLJAK-XKKWFBPMSA-N	OCC1OC(OC2OC=CC3C(O)CC(O)(C)C23)C(O)C(O)C1O	8.4129	0.0077141	1.38801
1139	Positive	13.118	818.653	Unknown	[M+H]+	null	null	null	null	3.6358	0.0077141	1.05204
1140	Positive	14.302	358.233	low score: Bullatine G	[M+H]+	C22H31NO3	Napelline-type diterpenoid alkaloids	CBOSLVQFGANWTL-JAQKJRLSSA-N	O=C1CC2C3(CC1C(=C)C3O)C4CC5C6(C)CN(CC)C4C25C(O)CC6	20.918	0.0077391	1.25874
1141	Positive	1.098	712.723	Unknown	[M+H]+	null	null	null	null	12.403	0.0077527	1.40979
1142	Positive	19.001	544.505	Unknown	[M+H]+	null	null	null	null	0.43587	0.0077527	1.61509
1143	Positive	16.479	355.093	low score: Scopolin	[M+H]+	C16H18O9	Coumarin glycosides	SGTCGCCQZOUMJJ-YMILTQATSA-N	O=C1OC=2C=C(OC3OC(CO)C(O)C(O)C3O)C(OC)=CC2C=C1	53.835	0.0077527	1.42857
1144	Positive	1.016	770.906	Unknown	[M+H]+	null	null	null	null	16.096	0.0077622	1.40308
1145	Positive	6.092	342.237	low score: MLS002207185-01!Ile-Pro-Ile90614-48-5	[M+H]+	C17H31N3O4	Oligopeptides	JNTMAZFVYNDPLB-UHFFFAOYSA-N	CCC(C)C(N)C(=O)N1CCCC1C(=O)NC(C(C)CC)C(=O)O	3.51	0.0077973	1.37996
1146	Positive	12.034	480.194	low score: NCGC00381048-01_C25H26O7_	[M+NH4]+	C25H26O7	Terpene lactones	YEOVVCBEYCCOOP-VGOFMYFVSA-N	CC(C)=CCC/C(C)=C/CC1=C(O)C(=C(O)C=C1)C2OC(=O)C3=C2C(=CC(=C3)C(O)=O)O	12.125	0.0078109	0.984532
1147	Positive	6.532	281.073	no MS2: Sulfameter (Bayrena)	[M+H]+	C11H12N4O3S	Aminobenzenesulfonamides	GPTONYMQFTZPKC-UHFFFAOYSA-N	C1(=CC=C(C=C1)S(NC2=NC=C(C=N2)OC)(=O)=O)N	2.4109	0.0078484	1.70213
1148	Positive	6.019	321.175	low score: 8,9-epoxy-3,10-diisobutyryloxythymol	[M+H]+	C18H24O5	Phenol esters	OLARKEMZPWGFJU-UHFFFAOYSA-N	O=C(OC1=CC(=CC=C1C2(OC2)COC(=O)C(C)C)C)C(C)C	6.2818	0.0078484	1.06905
1149	Positive	9.236	425.338	low score: delta-tocopherol	[M+Na]+	C27H46O2	Tocopherols	GZIFEOYASATJEH-BCQCSXDESA-N	OC=1C=C(C=2OC(C)(CCC2C1)CCCC(C)CCCC(C)CCCC(C)C)C	21.643	0.0078506	1.37001
1150	Positive	8.428	542.32	low score: NCGC00386071-01![3-methyl-1-[3-methyl-1-oxo-1-(2,3,4,5,6-pentahydroxyhexoxy)pentan-2-yl]oxy-1-oxopentan-2-yl] 2-hydroxy-3-methylpentanoate [IIN-based on: CCMSLIB00000846977]	[M+NH4]+	C24H44O12	Depsipeptides	UCAFTLMODRRASO-UHFFFAOYSA-N	CCC(C)C(O)C(=O)OC(C(C)CC)C(=O)OC(C(C)CC)C(=O)OCC(O)C(O)C(O)C(O)CO	13.558	0.0078506	1.09914
1151	Positive	13.018	443.33	low score: Paxisterol_120160	[M+H]+	C28H42O4	Ergostane steroids	WUKYEOQJBJKFPH-VHCNFDLSSA-N	O[C@H]1CC[C@@]2(C)[C@](C[C@H]3[C@]4(O3)[C@]2([H])CCC56[C@@]4([H])[C@H]7CC5[C@@](CCC(C(C)C)=C)(C)O[C@]6([H])O7)([H])C1	0.46171	0.0078539	1.55901
1152	Positive	1.293	128.994	no MS2: 3-Thiophenecarboxylic acid	[M+H]+	C5H4O2S	Thiophene carboxylic acids	YNVOMSDITJMNET-UHFFFAOYSA-N	OC(=O)c(c1)csc1	41.49	0.0078561	1.33582
1153	Positive	12.803	282.298	Unknown	[M+H]+	null	null	null	null	6.0885	0.0078561	1.34771
1154	Positive	1.719	638.265	no MS2: NCGC00381219-01![3,4-dihydroxy-5-[2-methylidene-4-[(2R,3R,4S,5S,6R)-3,4,5-trihydroxy-6-[(4-hydroxy-2-methylidenebutanoyl)oxymethyl]oxan-2-yl]oxybutanoyl]oxyoxan-2-yl]methyl 4-hydroxy-2-methylidenebutanoate [IIN-based on: CCMSLIB00000845412]	[M+NH4]+	C27H40O16	Saccharolipids	JGCNXPIMJMUVKE-OVYOWKQZSA-N	OCCC(=C)C(=O)OCC1OCC(OC(=O)C(=C)CCO[C@@H]2O[C@H](COC(=O)C(=C)CCO)[C@@H](O)[C@H](O)[C@H]2O)C(O)C1O	9.6766	0.0078561	1.35245
1155	Positive	1.204	522.323	low score: Methionine conjugated cholic acid	[M-H2O+H]+	C29H49NO6S	Glycinated bile acids and derivatives	VNBNDOGLQFEJKP-OPZMEAEDSA-N	C[C@H](CCC(N[C@@H](CCSC)C(O)=O)=O)[C@H]1CC[C@@]2([H])[C@]3([H])[C@H](O)C[C@]4([H])C[C@H](O)CC[C@]4(C)[C@H]3C[C@H](O)[C@@]21C	0.011584	0.0078561	1.28396
1156	Positive	19.215	806.629	Unknown	[M+H]+	null	null	null	null	0.42392	0.0078561	1.49901
1157	Negative	1.037	960.066	no MS2: PFSM-ammonio; [C23H28F23N2O8S2]+	[M-H]-	C23H28F23N2O8S2	Organosulfonic acids and derivatives	BVZPOCWBGSEIQW-UHFFFAOYSA-O	O=S(=O)(O)CCCN(C(CO)CC[N+](C)(C)CC(O)CO)S(=O)(=O)C(F)(F)C(F)(F)C(F)(F)C(F)(F)C(F)(F)C(F)(F)C(F)(F)C(F)(F)C(F)(F)C(F)(F)C(F)(F)F	0.39692	0.0078561	1.19884
1158	Negative	1.083	700.152	Unknown	[M-H]-	null	null	null	null	0.10079	0.0078625	1.22249
1159	Positive	1.185	405.844	Unknown	[M+H]+	null	null	null	null	3.3585	0.0078807	1.31816
1160	Positive	6.111	114.1	no MS2: Unknown (carbon number 6); PlaSMA ID-45	[M+H]+	C6H11NO	Unknown	null	null	3.5487	0.0078906	1.71811
1161	Positive	13.473	702.552	Unknown	[M+H]+	null	null	null	null	0.42048	0.0078906	1.5397
1162	Positive	16.2	338.342	Erucamide	[M+H]+	C22H43NO	Fatty amides	UAUDZVJPLUQNMU-KTKRTIGZSA-N	N=C(O)CCCCCCCCCCCC=CCCCCCCCC	5.171	0.0078906	1.32382
1163	Positive	9.364	304.322	Unknown	[M+H]+	null	null	null	null	0.48341	0.0078906	1.28303
1164	Positive	6.278	481.298	low score: Emetine	[M+2Na-H]+	C29H40N2O4	Emetine alkaloids	AUVVAXYIELKVAI-CKBKHPSWSA-N	CC[C@H]1CN2CCC3=CC(OC)=C(OC)C=C3[C@@H]2C[C@@H]1C[C@H]1NCCC2=CC(OC)=C(OC)C=C12	30.779	0.0078906	1.25607
1165	Positive	6.015	284.227	low score: C12-homoserine lactone	[M+H]+	C16H29NO3	N-acyl-alpha amino acids and derivatives	WILLZMOKUUPJSL-UHFFFAOYSA-N	CCCCCCCCCCCC(=O)NC1CCOC1=O	7.3276	0.0079067	1.5745
1166	Negative	1.217	636.175	Unknown	[M-H]-	null	null	null	null	0.066733	0.007917	1.35401
1167	Positive	1.053	616.906	Unknown	[M+H]+	null	null	null	null	10.539	0.0079236	1.38866
1168	Positive	0.742	389.845	Unknown	[M+H]+	null	null	null	null	24.278	0.0079767	1.55331
1169	Positive	1.021	164.935	Unknown	[M+H]+	null	null	null	null	0.47445	0.0080047	1.31089
1170	Positive	10.382	452.361	Unknown	[M+H]+	null	null	null	null	0.45996	0.0080047	1.54599
1171	Positive	0.701	190.946	Unknown	[M+H]+	null	null	null	null	108.81	0.0080801	1.608
1172	Positive	6.385	401.283	Unknown	[M+H]+	null	null	null	null	4.4524	0.0081073	1.31426
1173	Positive	13.014	233.139	low score: 3-(sec-butyl)-2-hydroxy-3H-benzo[e][1,4]diazepin-5(4H)-one	[M+H]+	C13H16N2O2	1,4-benzodiazepines	VKZICKDDJSFAAG-UHFFFAOYSA-N	O=C1NC(C(O)=NC=2C=CC=CC12)C(C)CC	0.46714	0.0081133	1.57333
1174	Positive	9.125	297.262	no MS2: 2-(N-butylpropionamido)-N-cyclohexylbutanamide	[M+H]+	C17H32N2O2	Tertiary carboxylic acid amides	QMXGNDITXNMQEK-UHFFFAOYSA-N	CCCCN(C(=O)CC)C(CC)C(=O)NC1CCCCC1	4.7006	0.0081196	1.35891
1175	Positive	0.665	389.843	Unknown	[M+H]+	null	null	null	null	55.959	0.00812	1.48674
1176	Positive	0.029	759.639	Unknown	[M+H]+	null	null	null	null	0.4495	0.00812	1.50155
1177	Positive	1.579	422.85	Unknown	[M+H]+	null	null	null	null	20.727	0.008126	1.45885
1178	Positive	17.948	387.381	Unknown	[M+H]+	null	null	null	null	0.39286	0.0081341	1.31037
1179	Positive	12.267	256.283	Unknown	[M+H]+	null	null	null	null	3.6531	0.0081396	1.08465
1180	Positive	9.45	650.447	Unknown	[M+H]+	null	null	null	null	19.241	0.0081464	1.20071
1181	Positive	9.344	688.342	low score: Acetylaconitine	[M+H]+	C36H49NO12	Aconitane-type diterpenoid alkaloids	RIPYIJVYDYCPKW-WEVHBWGYSA-N	CCN1CC2(COC)[C@H]3C(OC)C4[C@@H]1C3([C@@H]1C[C@@]3(O)C(OC(=O)C5=CC=CC=C5)[C@@H]1[C@]4(OC(C)=O)C(O)[C@@H]3OC)C(CC2OC(C)=O)OC	0.43979	0.0081607	1.37236
1182	Positive	1.17	486.784	Unknown	[M+H]+	null	null	null	null	5.9396	0.0081835	1.23266
1183	Positive	11.076	510.425	Unknown	[M+H]+	null	null	null	null	10.447	0.0082068	1.47108
1184	Positive	12.208	380.372	Unknown	[M+H]+	null	null	null	null	0.4878	0.0082267	1.6096
1185	Positive	13.544	589.38	low score: "(3R,6R)-6-((3R,5R,7R,8R,9S,10S,12S,13R,14S,17R)-3,7-diacetoxy-12-hydroxy-10,13-dimethylhexadecahydro-1H-cyclopenta[a]phenanthren-17-yl)heptane-1,3-diyl diacetate"	[M-H2O+H]+	C34H54O9	Monohydroxy bile acids, alcohols and derivatives	MRBBYYYXCVLILT-VUXPKORVSA-N	C[C@@H]([C@H]1CC[C@]2([H])[C@]1(C)[C@@H](O)C[C@@]3([H])[C@@]2([H])[C@H](OC(C)=O)C[C@]4([H])[C@]3(C)CC[C@@H](OC(C)=O)C4)CC[C@@H](OC(C)=O)CCOC(C)=O	0.42778	0.0082267	1.43483
1186	Positive	8.982	530.366	no MS2: Histidine conjugated chenodeoxycholic acid	[M+H]+	C30H47N3O5	Glycinated bile acids and derivatives	XTVWUFJAQMCVQZ-KJUDKMOBSA-N	C[C@H](CCC(N[C@@H](CC1=CNC=N1)C(O)=O)=O)[C@H]2CC[C@@]3([H])[C@]4([H])[C@H](O)C[C@]5([H])C[C@H](O)CC[C@]5(C)[C@H]4CC[C@@]32C	0.49014	0.0082607	1.27476
1187	Positive	1.138	434.853	Unknown	[M+H]+	null	null	null	null	5.0493	0.0082607	1.24545
1188	Positive	8.364	564.286	Unknown	[M+H]+	null	null	null	null	12.853	0.0082803	1.09693
1189	Positive	0.303	796.586	no MS2: Phosphatidylethanolamine (22:0/16:1) Abbr: BPoPE	[M+Na]+	C43H84NO8P	Phosphatidylethanolamines	ZNMZYHOEYPCVMP-MITQYPHISA-N	O=C(OCC(OC(=O)CCCCCCCC=CCCCCCC)COP(=O)(O)OCCN)CCCCCCCCCCCCCCCCCCCCC	0.42544	0.0082954	1.10491
1190	Positive	0.734	309.873	Unknown	[M+H]+	null	null	null	null	64.458	0.0083297	1.56483
1191	Positive	10.413	356.385	Unknown	[M+H]+	null	null	null	null	0.45608	0.0083925	1.69456
1192	Positive	9.836	572.422	Unknown	[M+H]+	null	null	null	null	0.4548	0.0083925	1.53127
1193	Positive	7.36	445.274	low score: Lovastatin hydroxy acid observed in lovastatin standard	[M+Na]+	C24H38O6	Medium-chain hydroxy acids and derivatives	QLJODMDSTUBWDW-BXMDZJJMSA-N	CCC(C)C(=O)OC1CC(C=C2C1C(C(C=C2)C)CCC(CC(CC(=O)O)O)O)C	0.4647	0.0083973	1.60911
1194	Positive	9.152	706.476	Unknown	[M+H]+	null	null	null	null	8.6001	0.0084926	1.09512
1195	Positive	7.707	211.137	low score: Cyclo(proline-leucine)	[M+H]+	C11H18N2O2	Alpha amino acids and derivatives	SZJNCZMRZAUNQT-UHFFFAOYNA-N	CC(C)CC1N=C(O)C2CCCN2C1=O	4.183	0.0084974	1.18499
1196	Positive	6.598	486.359	Unknown	[M+H]+	null	null	null	null	13.433	0.0084981	1.29812
1197	Positive	6.657	442.297	Unknown	[M+H]+	null	null	null	null	2.5282	0.0085095	1.25552
1198	Positive	6.36	100.083	no MS2: 2-Piperidone; CE0; XUWHAWMETYGRKB-UHFFFAOYSA-N	[M+H]+	C5H9NO	Piperidinones	XUWHAWMETYGRKB-UHFFFAOYSA-N	C1CCN=C(C1)O	8.5764	0.0085269	1.60329
1199	Positive	12.29	422.385	Unknown	[M+H]+	null	null	null	null	0.46341	0.0085573	1.58469
1200	Positive	13.601	239.253	Unknown	[M+H]+	null	null	null	null	7.1711	0.0085607	1.04514
1201	Positive	12.225	364.375	Unknown	[M+H]+	null	null	null	null	0.47814	0.0085607	1.68257
1202	Positive	8.538	636.276	no MS2: (NAG)(anMUR)-Aq	[M+ACN+H]+	C25H41N5O14	Dipeptides	XUEWAMZWAWHUPZ-UHFFFAOYSA-N	CC(=O)NC1C(OC2C3COC(O3)C(N)C2OC(C)C(=O)NC(C)C(=O)NC(CCC(=O)O)C(N)=O)OC(CO)C(O)C1O	25.756	0.0085607	1.6007
1203	Positive	0.127	355.095	no MS2: [1-hydroxy-1-(4-methoxyphenyl)propan-2-yl] 4-methoxybenzoate	[M+K]+	C18H20O5	P-methoxybenzoic acids and derivatives	MHJLKHNHGMUAPQ-UHFFFAOYSA-N	O=C(OC(C)C(O)C1=CC=C(OC)C=C1)C2=CC=C(OC)C=C2	21.524	0.0085607	1.59323
1204	Positive	0.65	369.083	low score: ethyl 3-(2,3-dihydrobenzo[b][1,4]dioxin-6-yl)-7-hydroxy-4-oxo-4H-chromene-2-carboxylate	[M+H]+	C20H16O7	Isoflavones	NTNSKOKPJWYQGX-UHFFFAOYSA-N	O=C(OCC)C=1OC2=CC(O)=CC=C2C(=O)C1C=3C=CC=4OCCOC4C3	88.748	0.0085607	1.44729
1205	Positive	0.054	297.103	no MS2: OCP_297.1002_16.5	[M+H]+	C14H17ClN2O3	Phenylpiperazines	FMKKWAHJJLLAOW-UHFFFAOYSA-N	OC(=O)CCC(=O)N1CCN(CC1)c1ccccc1Cl	4.1724	0.0086084	1.57659
1206	Positive	10.423	616.216	no MS2: NCGC00385154-01!4-[3-[(2S,3R,4S,5S,6R)-6-[[(2R,3R,4R)-3,4-dihydroxy-4-(hydroxymethyl)oxolan-2-yl]oxymethyl]-3,4,5-trihydroxyoxan-2-yl]oxy-2-hydroxy-3-methylbutoxy]furo[3,2-g]chromen-7-one [IIN-based on: CCMSLIB00000848662]	[M+NH4]+	C27H34O15	Psoralens	WHICJDPSYBJDEN-NQXQTLPHSA-N	CC(C)(O[C@@H]1O[C@H](CO[C@@H]2OC[C@](O)(CO)[C@H]2O)[C@@H](O)[C@H](O)[C@H]1O)C(O)COC3=C4C=CC(=O)OC4=CC5=C3C=CO5	0.42615	0.0086084	1.38225
1207	Positive	17.973	445.151	no MS2: Piptocarphin A	[M+Na]+	C21H26O9	Tricarboxylic acids and derivatives	BZQDHZDSIXPDSS-CYDVCVIESA-N	O=C1C(COC(C)=O)=C2[C@@H](OC(C(C)=C)=O)C[C@@](C)(O)[C@@](O)(O3)CC[C@]3(C)/C=C2/O1	11.551	0.0086084	1.26947
1208	Positive	7.358	432.277	low score: NCGC00381130-01!methyl (2E,8E)-9-[3a-hydroxy-6,7-dimethyl-1-(2-methylpropyl)-3-oxo-2,4,7,7a-tetrahydro-1H-isoindol-4-yl]-4,5-dihydroxy-8-methylnona-2,8-dienoate [IIN-based on: CCMSLIB00000846918]	[M-H2O+H]+	C25H39NO6	Bicyclic monoterpenoids	YUXUTEAAGHFKKH-MKQCFFQWSA-N	COC(=O)\\C=C\\C(O)C(O)CC\\C(C)=C\\C1C=C(C)C(C)C2C(CC(C)C)NC(=O)C12O	0.46438	0.0086084	1.66624
1209	Positive	17.517	620.564	Unknown	[M+H]+	null	null	null	null	0.44212	0.0086084	1.57883
1210	Positive	8.835	288.281	low score: C17-Sphinganine	[M+H]+	C17H37NO2	1,2-aminoalcohols	KFQUQCFJDMSIJF-UHFFFAOYSA-N	CCCCCCCCCCCCCCC(C(CO)N)O	0.46964	0.0086084	1.4415
1211	Positive	6.209	430.295	low score: glycohyocholic acid	[M-2H2O+H]+	C26H43NO6	Glycinated bile acids and derivatives	ZQYUKJFJPJDMMR-ZDWCHQGWSA-N	C[C@H](CCC(=O)NCC(=O)O)[C@H]1CC[C@@H]2[C@@]1(CC[C@H]3[C@H]2[C@@H]([C@@H]([C@H]4[C@@]3(CC[C@H](C4)O)C)O)O)C	6.7926	0.0086084	1.43212
1212	Positive	1.152	620.261	Unknown	[M+H]+	null	null	null	null	0.0046649	0.0086084	1.25209
1213	Positive	1.155	613.32	no MS2: NCGC00170014-03!(E)-N-(4-acetamidobutyl)-3-(4-hydroxy-3-methoxyphenyl)prop-2-enamide [IIN-based on: CCMSLIB00000848670]	[2M+H]+	C16H22N2O4	Methoxyphenols	ZVMGKOAHBAIHLO-SOFGYWHQSA-N	COC1=C(O)C=CC(\\C=C\\C(=O)NCCCCNC(C)=O)=C1	0.019671	0.0086084	1.20408
1214	Positive	9.002	808.523	Unknown	[M+H]+	null	null	null	null	14.652	0.0086084	1.02884
1215	Positive	12.896	828.599	Unknown	[M+H]+	null	null	null	null	2.0502	0.0086084	1.24633
1216	Positive	8.218	380.284	Unknown	[M+H]+	null	null	null	null	12.951	0.0086345	0.960902
1217	Positive	10.516	707.251	low score: (2R,3S,4S,5R,6S)-2-(hydroxymethyl)-6-[4-[[(3S,4S)-4-(hydroxymethyl)-5-[3-methoxy-4-[(2S,3R,4S,5S,6R)-3,4,5-trihydroxy-6-(hydroxymethyl)oxan-2-yl]oxyphenyl]oxolan-3-yl]methyl]-2-methoxyphenoxy]oxane-3,4,5-triol	[M+Na]+	C32H44O16	Lignan glycosides	PBLWZMSRSJTRHJ-HVZZXTKSSA-N	OCC1OC(OC2=CC=C(C=C2OC)CC3COC(C4=CC=C(OC5OC(CO)C(O)C(O)C5O)C(OC)=C4)C3CO)C(O)C(O)C1O	60.125	0.0086437	1.52834
1218	Positive	14.332	338.364	Unknown	[M+H]+	null	null	null	null	23.843	0.0086509	1.63482
1219	Positive	9.432	332.331	Unknown	[M+H]+	null	null	null	null	0.29558	0.0086509	1.04954
1220	Positive	0.648	196.903	Unknown	[M+H]+	null	null	null	null	39.661	0.0086662	1.45379
1221	Positive	9.783	616.402	Unknown	[M+H]+	null	null	null	null	18.821	0.0086675	1.35611
1222	Positive	13.444	464.414	Unknown	[M+H]+	null	null	null	null	0.44885	0.0086675	1.59423
1223	Positive	1.163	273.187	low score: Galaxolidone	[M+H]+	C18H24O2	2-benzopyrans	PGMHPYRIXBRRQD-UHFFFAOYSA-N	CC2(C)c1cc3C(=O)OCC(C)c3cc1C(C)(C)C2C	3.1291	0.0086921	1.45536
1224	Positive	13.624	628.416	Unknown	[M+H]+	null	null	null	null	28.247	0.0086987	1.09154
1225	Positive	7.359	404.233	low score: NCGC00180558-02!	[M+NH4]+	C21H30O5	Naphthopyrans	SNDKOELNUHQSEY-UHFFFAOYSA-N	CC1CC(=O)C2=C(O1)OC3(C)CCC4(O)C(C)(C)CCC(=O)C4(C)C3C2	0.47123	0.0087175	1.71
1226	Positive	0.792	141.968	Unknown	[M+H]+	null	null	null	null	8.4064	0.0087175	1.5939
1227	Positive	0.11	372.127	no MS2: NCGC00380360-01!7-methoxy-6-[(2S,3R,4S,5S,6R)-3,4,5-trihydroxy-6-(hydroxymethyl)oxan-2-yl]oxychromen-2-one	[M+NH4]+	C16H18O9	Coumarin glycosides	WBAVLTNIRYDCPM-YMILTQATSA-N	COC1=CC2=C(C=CC(=O)O2)C=C1O[C@@H]3O[C@H](CO)[C@@H](O)[C@H](O)[C@H]3O	36.791	0.0087175	1.4594
1228	Positive	0.709	277.877	Unknown	[M+H]+	null	null	null	null	17.12	0.0087175	1.40348
1229	Positive	0.376	313.218	low score: Guggulsterone E&Z	[M+H]+	C21H28O2	Androgens and derivatives	WDXRGPWQVHZTQJ-AYSLTRBKSA-N	O=C1C=C2CCC3C4CC(=O)C(=CC)C4(C)CCC3C2(C)CC1	17.279	0.0087276	1.48309
1230	Positive	16.282	355.095	no MS2: [1-hydroxy-1-(4-methoxyphenyl)propan-2-yl] 4-methoxybenzoate	[M+K]+	C18H20O5	P-methoxybenzoic acids and derivatives	MHJLKHNHGMUAPQ-UHFFFAOYSA-N	O=C(OC(C)C(O)C1=CC=C(OC)C=C1)C2=CC=C(OC)C=C2	32.022	0.0087276	1.48851
1231	Positive	16.618	520.176	low score: NCGC00380203-01_C26H30ClNO8_2-{7-Acetoxy-5-chloro-3-[(1E,3E)-3,5-dimethyl-1,3-heptadien-1-yl]-7-methyl-6,8-dioxo-7,8-dihydro-2(6H)-isoquinolinyl}pentanedioic acid	[M+H]+	C26H30ClNO8	Glutamic acid and derivatives	BVIXPBFQDINHQZ-XHBXSBNISA-N	CCC(C)\C=C(C)\C=C\C1=C\C/2=C(Cl)/C(=O)C(C)(OC(C)=O)C(=O)C2=C\N1C(CCC(O)=O)C(O)=O	111.46	0.0087276	1.38822
1232	Positive	8.141	458.896	Unknown	[M+H]+	null	null	null	null	0.44932	0.0087333	1.42574
1233	Positive	9.4	588.279	Unknown	[M+H]+	null	null	null	null	822.09	0.0087896	1.16872
1234	Positive	6.408	377.241	low score: 5-[5-hydroxy-3-(hydroxymethyl)pentyl]-8a-(hydroxymethyl)-5,6-dimethyl-3,4,4a,6,7,8-hexahydronaphthalene-1-carboxylic acid	[M+Na]+	C20H34O5	Colensane and clerodane diterpenoids	VOCJFEUCJDTXSA-UHFFFAOYSA-N	O=C(O)C1=CCCC2C1(CO)CCC(C)C2(C)CCC(CO)CCO	18.589	0.0087906	1.38325
1235	Positive	0.532	325.249	low score: allo-Protolichesterinic acid	[M+H]+	C19H32O4	Gamma butyrolactones	WZYZDHVPSZCEEP-IRXDYDNUSA-N	CCCCCCCCCCCCC[C@@H]1OC(=O)C(=C)[C@@H]1C(=O)O	0.48065	0.0088232	1.47648
1236	Positive	0.685	360.892	Unknown	[M+H]+	null	null	null	null	4.4459	0.0088244	1.43827
1237	Positive	8.51	302.333	Unknown	[M+H]+	null	null	null	null	0.456	0.0088561	1.69178
1238	Negative	1.365	487.218	low score: Vardenafil	[M-H]-	C23H32N6O4S	Benzenesulfonamides	SECKRCOLJRRGGV-UHFFFAOYSA-N	O=C1N=C(NN2C(=NC(=C12)C)CCC)C=3C=C(C=CC3OCC)S(=O)(=O)N4CCN(CC)CC4	0.17896	0.0088872	1.12442
1239	Positive	7.806	279.113	low score: (3E)-3-benzylidene-4-methyl-1H-1,4-benzodiazepine-2,5-dione	[M+H]+	C17H14N2O2	1,4-benzodiazepines	FYVKHLSOIIPVEH-RVDMUPIBSA-N	O=C1C=2C=CC=CC2N=C(O)C(=CC=3C=CC=CC3)N1C	3.105	0.00893	1.57102
1240	Positive	6.392	400.318	low score: (9Z,12Z)-N-(3-Methoxybenzyl)octadeca-9,12-dienamide	[M+H]+	C26H41NO2	Anisoles	BMQBTHWVNBJSPS-NQLNTKRDSA-N	O=C(NCC=1C=CC=C(OC)C1)CCCCCCCC=CCC=CCCCCC	8.2998	0.0089318	1.46493
1241	Positive	15.397	324.246	no MS2: Melophlin B/C/G/K/L/N/O	[M+H]+	C19H33NO3	N-alkylpyrrolidines	WBPPODSRZVXVJK-MSUUIHNZSA-N	CCCCCCCCCCCC/C(O)=C(C1=O)\C(C(N1C)C)=O	0.46248	0.0089387	1.66837
1242	Positive	0.6	283.07	no MS2: Niflumic acid	[M+H]+	C13H9F3N2O2	Trifluoromethylbenzenes	JZFPYUNJRRFVQU-UHFFFAOYSA-N	C1(C(=CC=CN=1)C(=O)O)NC2C=C(C=CC=2)C(F)(F)F	2.1907	0.0089387	1.54712
1243	Positive	7.799	446.287	Unknown	[M+H]+	null	null	null	null	5.6333	0.0089387	1.26636
1244	Positive	14.055	628.416	Unknown	[M+H]+	null	null	null	null	30.313	0.0089603	1.15522
1245	Positive	1.298	308.111	no MS2: NCGC00385493-01!methyl 7-(2-methylpropanoyloxy)-2-oxochromene-6-carboxylate [IIN-based: Match]	[M+NH4]+	C15H14O6	Coumarins and derivatives	VUVWVGLISBHUCV-UHFFFAOYSA-N	COC(=O)C1=C(OC(=O)C(C)C)C=C2OC(=O)C=CC2=C1	6.1588	0.008969	1.16494
1246	Positive	10.492	606.33	low score: NCGC00386085-01_C32H44O10_	[M+NH4]+	C32H44O10	Oxepanes	MPCIDUFOTGXABA-UHFFFAOYSA-N	CC1OC\23C/4=C(/C(O)C5C(C)(CCC6OC(CC(OC(C)=O)C56C)C(C)(C)O)O4)C(=O)\C=C2C(C)C(OC(C)=O)C13C	63.096	0.0089724	1.55918
1247	Positive	7.726	393.313	low score: DEOXYCHOLIC ACID	[M+H]+	C24H40O4	Dihydroxy bile acids, alcohols and derivatives	KXGVEGMKQFWNSR-LLQZFEROSA-N	C[C@H](CCC(=O)O)[C@H]1CC[C@@H]2[C@@]1([C@H](C[C@H]3[C@H]2CC[C@H]4[C@@]3(CC[C@H](C4)O)C)O)C	10.787	0.0089724	1.41996
1248	Positive	1.151	620.29	Unknown	[M+H]+	null	null	null	null	0.013841	0.0089754	1.18061
1249	Positive	10.731	324.246	no MS2: Melophlin B/C/G/K/L/N/O	[M+H]+	C19H33NO3	N-alkylpyrrolidines	WBPPODSRZVXVJK-MSUUIHNZSA-N	CCCCCCCCCCCC/C(O)=C(C1=O)\C(C(N1C)C)=O	0.47187	0.0089899	1.66185
1250	Positive	11.104	846.603	Unknown	[M+H]+	null	null	null	null	2.6522	0.0089926	0.983088
1251	Positive	12.364	834.642	Unknown	[M+H]+	null	null	null	null	2.4259	0.0089982	1.2723
1252	Positive	15.223	285.3	low score: N-[3-(Dimethylamino)propyl]dodecanamide	[M+H]+	C17H36N2O	N-acyl amines	TWMFGCHRALXDAR-UHFFFAOYSA-N	CCCCCCCCCCCC(=O)NCCCN(C)C	5.2479	0.009003	1.35506
1253	Positive	9.113	324.244	low score: Melophlin B/C/G/K/L/N/O	[M+H]+	C19H33NO3	N-alkylpyrrolidines	WBPPODSRZVXVJK-MSUUIHNZSA-N	CCCCCCCCCCCC/C(O)=C(C1=O)\C(C(N1C)C)=O	0.47844	0.009003	1.56473
1254	Positive	6.478	413.268	low score: 2-acetoxy-4-pentadecylbenzoic acid	[M+Na]+	C24H38O4	Acylsalicylic acids	FMPIFABORGZGFA-UHFFFAOYSA-N	OC(C1=CC=C(CCCCCCCCCCCCCCC)C=C1OC(C)=O)=O	3.5591	0.0090051	1.47915
1255	Positive	17.973	429.12	no MS2: 6,7-dimethoxy-1-phenyl-8H-benzo[c]indolo[3,2,1-ij][1,5]naphthyridin-8-one	[M+Na]+	C26H18N2O3	Indolonaphthyridine alkaloids	KSZOEOONASRENA-UHFFFAOYSA-N	O=C1C=2C(OC)=C(OC)C=CC2C=3N=CC(C4=CC=CC=C4)=C5C=6C=CC=CC6N1C35	7.3147	0.0090077	1.14222
1256	Positive	15.968	312.348	Unknown	[M+H]+	null	null	null	null	30.608	0.0090143	1.39085
1257	Positive	14.443	284.314	Unknown	[M+H]+	null	null	null	null	3.6189	0.0090155	1.17672
1258	Positive	10.565	365.17	low score: Magnoflorine	[M+Na]+	C20H24NO4	Aporphines	YLRXAIKMLINXQY-ZDUSSCGKSA-O	OC=1C(OC)=CC=C2C1C=3C(O)=C(OC)C=C4C3C(C2)[N+](C)(C)CC4	0.46974	0.0090161	1.51445
1259	Positive	16.699	516.471	Unknown	[M+H]+	null	null	null	null	0.45566	0.0090253	1.60736
1260	Positive	13.656	338.367	Unknown	[M+H]+	null	null	null	null	21.782	0.0090468	1.55296
1261	Positive	0.697	241.849	Unknown	[M+H]+	null	null	null	null	115.66	0.0090791	1.62605
1262	Positive	13.505	354.218	no MS2: Methysergide	[M+H]+	C21H27N3O2	Lysergamides	KPJZHOPZRAFDTN-ZRGWGRIASA-N	CCC(CO)NC(=O)C(C4)C=C(C(N(C)4)1)c(c3)c(c(cc3)2)c(cn(C)2)C1	10.858	0.0090956	1.04045
1263	Positive	11.805	351.277	low score: NCGC00385006-01_C25H36O2_Dicyclopenta[a,d]cycloocten-3(3aH)-one, 7-[(2Z)-1,5-dimethyl-2,4-hexadien-1-yl]-6,6a,7,8,9,9a,10,10a-octahydro-4-(hydroxymethyl)-1,9a-dimethyl-, (4E,6aS,7R,9aR,10aS)-	[M-H2O+H]+	C25H36O2	Ophiobolane sesterterpenoids	GUXDHNIKRQCWIE-WMZUYDDLSA-N	C[C@@H](\C=C/C=C(C)C)[C@H]1CC[C@]2(C)C[C@H]\3C(C(=O)\C=C3C)\C(=C/C[C@@H]12)CO	0.48044	0.0091047	1.28904
1264	Positive	13.512	338.368	Unknown	[M+H]+	null	null	null	null	22.122	0.0091113	1.5945
1265	Positive	6.489	203.133	low score: Alanylleucine (isomer of 674)	[M+H]+	C9H18N2O3	Peptides	RDIKFPRVLJLMER-UHFFFAOYSA-N	O=C(O)C(NC(=O)C(N)C)CC(C)C	16.755	0.0091113	1.45797
1266	Positive	6.495	465.299	low score: Pristimerin	[M+H]+	C30H40O4	Triterpenoids	JFACETXYABVHFD-WXPPGMDDSA-N	O=C1C=C2C(=CC=C3C2(C)CCC4(C)C5CC(C(=O)OC)(C)CCC5(C)CCC34C)C(=C1O)C	40.829	0.0091113	1.42673
1267	Positive	9.202	297.261	low score: 2-(N-butylpropionamido)-N-cyclohexylbutanamide	[M+H]+	C17H32N2O2	Tertiary carboxylic acid amides	QMXGNDITXNMQEK-UHFFFAOYSA-N	CCCCN(C(=O)CC)C(CC)C(=O)NC1CCCCC1	5.4217	0.0091113	1.33196
1268	Negative	10.224	530.251	Unknown	[M-H]-	null	null	null	null	0.29819	0.0091184	1.03905
1269	Positive	9.306	706.477	Unknown	[M+H]+	null	null	null	null	7.0287	0.0091394	1.43539
1270	Positive	6.543	100.084	no MS2: 2-Piperidone; CE0; XUWHAWMETYGRKB-UHFFFAOYSA-N	[M+H]+	C5H9NO	Piperidinones	XUWHAWMETYGRKB-UHFFFAOYSA-N	C1CCN=C(C1)O	9.2759	0.0091478	1.64064
1271	Positive	12.528	688.505	low score: DG(20:5/0:0/20:5) (d5)	[M+Na]+	C43H59[2H]5O5	Other hydroxyeicosapolyenoic acids	TXYVJIXIUGRAFF-VSBNSUKNSA-N	[2H]C(OC(=O)CCC/C=C\C/C=C\C/C=C\C/C=C\C/C=C\CC)(C(O)(C(OC(=O)CCC/C=C\C/C=C\C/C=C\C/C=C\C/C=C\CC)([2H])[2H])[2H])[2H]	5.2589	0.0091537	1.10002
1272	Positive	1.02	327.07	no MS2: Triphenylphosphate	[M+H]+	C18H15O4P	Aryl phosphotriesters	XZZNDPSIHUTMOC-UHFFFAOYSA-N	O=P(OC1=CC=CC=C1)(OC1=CC=CC=C1)OC1=CC=CC=C1	4.1083	0.0091722	1.33188
1273	Positive	1.051	730.867	Unknown	[M+H]+	null	null	null	null	5.2987	0.009173	1.1541
1274	Positive	8.2	518.362	low score: ORLISTAT	[M+Na]+	C29H53NO5	Leucine and derivatives	AHLBNYSZXLDEJQ-FWEHEUNISA-N	CCCCCCCCCCC[C@@H](C[C@@H]1OC(=O)[C@H]1CCCCCC)OC(=O)[C@H](CC(C)C)NC=O	0.49264	0.0091909	1.29271
1275	Positive	0.677	158.014	Unknown	[M+H]+	null	null	null	null	107.55	0.009192	1.59573
1276	Positive	1.04	222.925	Unknown	[M+H]+	null	null	null	null	0.4604	0.009192	1.25682
1277	Positive	0.646	224.899	Unknown	[M+H]+	null	null	null	null	65.631	0.009192	1.47806
1278	Positive	6.331	268.231	Unknown	[M+H]+	null	null	null	null	3.9328	0.009192	1.46371
1279	Positive	15.161	645.526	Unknown	[M+H]+	null	null	null	null	0.47922	0.009192	1.44446
1280	Positive	12.464	353.267	C21H36O4; PlaSMA ID-1954	[M+H]+	C21H36O4	Formula predicted	null	null	2.7773	0.009192	1.19454
1281	Positive	1.125	678.239	no MS2: NCGC00385597-01_C32H39NO15_(1S,3R,13S,14S,17S,18R,19R,20S,21S,23R,24R,25S)-20-(Acetoxymethyl)-18,24,25-trihydroxy-3,13,14,25-tetramethyl-6,15,22-trioxo-2,5,16-trioxa-11-azapentacyclo[15.7.1.0~1,20~.0~3,23~.0~7,12~]pentacosa-7,9,11-triene-19,21-diyl diacetate	[M+H]+	C32H39NO15	Alkaloids and derivatives	UKUDXSDOMXVGOK-HOZDLOOJSA-N	C[C@H]1[C@H](C)C2=C(C=CC=N2)C(=O)OC[C@]3(C)O[C@]45[C@H](O)[C@H]3C(=O)[C@@H](OC(C)=O)[C@]4(COC(C)=O)[C@@H](OC(C)=O)[C@@H](O)[C@H](OC1=O)[C@]5(C)O	0.0066139	0.009192	1.2983
1282	Positive	1.146	618.265	low score: (S)-4-(((1R,2S,3S,4R,5S)-5-amino-2-(((2S,3R,4S,5S,6R)-4-amino-3,5-dihydroxy-6-(hydroxymethyl)tetrahydro-2H-pyran-2-yl)oxy)-4-(((2R,3R,4S,5S,6R)-6-(ammoniomethyl)-3,4,5-trihydroxytetrahydro-2H-pyran-2-yl)oxy)-3-hydroxycyclohexyl)amino)-3-hydroxy-4-oxob...	[M+H]+	C22H47N5O21S2	4,6-disubstituted 2-deoxystreptamines	FXKSEJFHKVNEFI-FSAGMDOUSA-N	O=C(NC1CC(N)C(OC2OC(C[NH3+])C(O)C(O)C2O)C(O)C1OC3OC(CO)C(O)C(N)C3O)C(O)CC[NH3+].O=S(=O)([O-])O.O=S(=O)([O-])O	0.0051924	0.009192	1.25713
1283	Negative	1.262	637.115	no MS2: Unknown (carbon number 27); PlaSMA ID-1753	[M-H]-	C27H26O18	Unknown	null	null	0.11322	0.009192	1.06052
1284	Positive	0.637	185.996	Unknown	[M+H]+	null	null	null	null	16.163	0.0092205	1.11978
1285	Positive	7.988	225.212	low score: N~1~,N~4~-bis(3-aminopropyl)-1,4-butanediamine	[M+Na]+	C10H26N4	Dialkylamines	PFNFFQXMRSDOHW-UHFFFAOYSA-N	NCCCNCCCCNCCCN	31.019	0.0092205	1.54892
1286	Positive	14.337	223.079	no MS2: 2-methylanthra-9,10-quinone	[M+H+Na]2+	C15H10O2	Anthraquinones	NJWGQARXZDRHCD-UHFFFAOYSA-N	O=C1C=2C=CC=CC2C(=O)C3=CC(=CC=C13)C	5.3633	0.0092205	1.53983
1287	Positive	6.257	429.264	no MS2: "(4R,E)-4-((3R,5R,6S,7R,9S,10R,13R,14S,17R)-3,6,7-trihydroxy-10,13-dimethylhexadecahydro-1H-cyclopenta[a]phenanthren-17-yl)pent-2-enoic acid"	[M+Na]+	C24H38O5	7-hydroxysteroids	OVBZFPUPFCLMFP-JVKJFCMBSA-N	[H][C@@]1([C@H](O)[C@@H]2O)C[C@H](O)CC[C@]1(C)[C@@H]3[C@@]2([C@H](CC[C@@H]4[C@H](C)/C=C/C(O)=O)[C@]4(C)CC3)[H]	5.5823	0.0092205	1.16845
1288	Positive	15.477	401.369	low score: Campesterol	[M+H]+	C28H48O	Ergosterols and derivatives	SGNBVLSWZMBQTH-ZRUUVFCLSA-N	OC1CC2=CCC3C(CCC4(C)C(CCC34)C(C)CCC(C)C(C)C)C2(C)CC1	3.7016	0.0092205	0.996228
1289	Positive	14.327	297.26	no MS2: 2-(N-butylpropionamido)-N-cyclohexylbutanamide	[M+H]+	C17H32N2O2	Tertiary carboxylic acid amides	QMXGNDITXNMQEK-UHFFFAOYSA-N	CCCCN(C(=O)CC)C(CC)C(=O)NC1CCCCC1	19.527	0.0092224	1.45608
1290	Positive	17.225	612.556	no MS2: 1-(hexadecanoyloxy)-3-hydroxypropan-2-yl-octadec-9-enoate	[M+NH4]+	C37H70O5	1,2-diacylglycerols	YEJYLHKQOBOSCP-ISLYRVAYSA-N	CCCCCCCCCCCCCCCC(=O)OCC(CO)OC(=O)CCCCCCCC=CCCCCCCCC	0.45287	0.0092272	1.12703
1291	Negative	7.308	464.281	Unknown	[M-H]-	null	null	null	null	0.049803	0.0092308	1.37249
1292	Positive	6.578	382.27	low score: Sphinganine 1-phosphate	[M+H]+	C18H40NO5P	Phosphosphingolipids	YHEDRJPUIRMZMP-ZWKOTPCHSA-N	CCCCCCCCCCCCCCC[C@H]([C@H](COP(=O)(O)O)N)O	3.8099	0.0092358	1.37187
1293	Positive	12.183	487.397	low score: hyperin	[M+Na]+	C21H20O12	Flavonoid-3-O-glycosides	OVSQVDMCBVZWGM-DTGCRPNFSA-N	O=C1C(OC2OC(CO)C(O)C(O)C2O)=C(OC=3C=C(O)C=C(O)C13)C=4C=CC(O)=C(O)C4	21.446	0.0092499	1.29176
1294	Positive	10.864	312.364	Unknown	[M+H]+	null	null	null	null	0.42626	0.0092502	1.39133
1295	Positive	1.166	424.936	Unknown	[M+H]+	null	null	null	null	4.22	0.0092502	1.18671
1296	Positive	14.091	157.093	no MS2: SUBERATE	[M-H2O+H]+	C8H14O4	Medium-chain fatty acids	TYFQFVWCELRYAO-UHFFFAOYSA-N	OC(=O)CCCCCCC(O)=O	6.4142	0.0092554	1.47051
1297	Positive	6.151	330.233	no MS2: Unknown (carbon number 16); PlaSMA ID-1788	[M+H]+	C16H31N3O4	Unknown	null	null	5.4311	0.009261	1.50843
1298	Positive	9.002	799.035	Unknown	[M+H]+	null	null	null	null	14.384	0.0092647	0.884089
1299	Positive	8.898	504.343	low score: "((4R)-4-((3R,5S,7R,9S,10S,13R,14S,17R)-3,7-dihydroxy-10,13-dimethylhexadecahydro-1H-cyclopenta[a]phenanthren-17-yl)pentanoyl)-D-phenylalanine"	[M-2H2O+H]+	C33H49NO5	Glycinated bile acids and derivatives	CEMZGPKUKMFNNF-TUBYWNESSA-N	[H][C@@]12[C@H](O)C[C@@H]3C[C@H](O)CC[C@]3(C)[C@H]1CC[C@@]4(C)[C@H]2CC[C@@H]4[C@@H](CCC(N[C@H](CC5=CC=CC=C5)C(O)=O)=O)C	6.7667	0.0092678	1.23359
1300	Positive	6.455	421.27	low score: Maytenin	[M+H]+	C28H36O3	Cyclic ketones	WSTYNZDAOAEEKG-JCNSEWGNSA-N	O=C1C[C@]2(C)CC[C@]3(C)C([C@@]4(C)CC[C@@]3(C)C2C[C@H]1C)=CC=C(C4=C5)C(C)=C(O)C5=O	28.02	0.0092813	1.40737
1301	Negative	1.265	697.315	Unknown	[M-H]-	null	null	null	null	0.069566	0.0092813	1.22898
1302	Positive	14.38	451.243	no MS2: Ingenol-3,4-5,20-diacetonide	[M+Na]+	C26H36O5	Ketals	JOKBBQPBIIZMJV-JQFFUGKZSA-N	O=C1C2C=C3COC(OC3C45OC(OC5C(=CC14C(C)CC6C2C6(C)C)C)(C)C)(C)C	76.786	0.00929	1.17046
1303	Positive	16.456	281.072	no MS2: Sulfameter (Bayrena)	[M+H]+	C11H12N4O3S	Aminobenzenesulfonamides	GPTONYMQFTZPKC-UHFFFAOYSA-N	C1(=CC=C(C=C1)S(NC2=NC=C(C=N2)OC)(=O)=O)N	3.4697	0.0092941	1.6311
1304	Positive	10.574	360.213	low score: Unknown (carbon number 16); PlaSMA ID-2012	[M+NH4]+	C16H29N3O6	Unknown	null	null	0.48194	0.0092941	1.34904
1305	Positive	10.492	658.381	Unknown	[M+H]+	null	null	null	null	43.751	0.0092958	1.39471
1306	Positive	0.718	564.238	low score: NCGC00380192-01! [IIN-based on: CCMSLIB00000847542]	[M+Na]+	C29H35NO9	Steroid lactones	LGGJSHGJCMYMKU-UHFFFAOYSA-N	CC(=O)OCC1(C)C(CCC2(C)C1CC(O)C3(C)OC4=C(C(O)C23)C(=O)OC(=C4)C5=CN=CC=C5)OC(C)=O	10.412	0.0092987	1.33452
1307	Positive	1.096	514.935	Unknown	[M+H]+	null	null	null	null	3.1187	0.0093549	1.13022
1308	Positive	7.244	100.084	no MS2: 2-Piperidone; CE0; XUWHAWMETYGRKB-UHFFFAOYSA-N	[M+H]+	C5H9NO	Piperidinones	XUWHAWMETYGRKB-UHFFFAOYSA-N	C1CCN=C(C1)O	11.703	0.0093552	1.61562
1309	Positive	6.318	370.271	low score: 9,13-Epoxy-3,18-dihydroxy-15,16-labdanolide	[M+NH4]+	C20H32O5	Gamma butyrolactones	QHYFPLAXWXWDJP-GNQMFGHGSA-N	C[C@@H]1CCC2[C@](C)(CC[C@H](O)[C@@]2(C)CO)[C@@]12CC1(COC(=O)C1)CO2	3.8021	0.0093552	1.44176
1310	Positive	1.053	614.942	Unknown	[M+H]+	null	null	null	null	3.0632	0.0093552	1.07931
1311	Positive	6.907	100.083	no MS2: 2-Piperidone; CE0; XUWHAWMETYGRKB-UHFFFAOYSA-N	[M+H]+	C5H9NO	Piperidinones	XUWHAWMETYGRKB-UHFFFAOYSA-N	C1CCN=C(C1)O	10.393	0.0093762	1.57439
1312	Positive	8.881	708.46	low score: MLS002222329-01!26305-03-3	[M+Na]+	C34H63N5O9	Hybrid peptides	FAXGPCHRFPCXOO-LXTPJMTPSA-N	CC(C)C[C@H](NC(=O)[C@H](C)NC(=O)C[C@H](O)[C@H](CC(C)C)NC(=O)[C@@H](NC(=O)[C@@H](NC(=O)CC(C)C)C(C)C)C(C)C)[C@@H](O)CC(=O)O	3.1546	0.009383	1.08595
1313	Positive	16.935	402.393	Unknown	[M+H]+	null	null	null	null	0.4825	0.0093836	1.64047
1314	Positive	6.478	435.249	low score: (2Z)-2-[(E)-6-(hydroxymethyl)-2,4,8,10-tetramethyldodec-2-enylidene]-4-methylpentanedioic acid	[M+2Na-H]+	C23H40O5	Acyclic diterpenoids	NNPPLRJHBQPBAQ-UKRBZAIKSA-N	O=C(O)C(=CC(=CC(C)CC(CO)CC(C)CC(C)CC)C)CC(C(=O)O)C	11.748	0.009387	1.39846
1315	Positive	6.394	212.134	low score: Mescaline	[M+H]+	C11H17NO3	Phenethylamines	RHCSKNNOAZULRK-UHFFFAOYSA-N	COC1=CC(=CC(=C1OC)OC)CCN	20.147	0.0093896	1.43352
1316	Positive	0.555	235.223	no MS2: (1R,2R,5R,7S)-2-cyclopentyl-5,7-dimethyl-1,3-diazaadamantane	[M+H]+	C15H26N2	Diazinanes	ZKHXDVJFFSPXFK-QKDCVEJESA-N	N12CC3(C)CN(CC(C)(C1)C3)C2C4CCCC4	5.8205	0.0093924	1.56952
1317	Positive	0.275	441.336	low score: NCGC00169592-02_C29H46O4_3aH-Cyclopenta[a]chrysene-3a-carboxylic acid, 1-acetyleicosahydro-9-hydroxy-5a,5b,8,8,11a-pentamethyl-, (1R,3aS,5aR,5bR,9S,11aR)-	[M-H2O+H]+	C29H46O4	Oxosteroids	RVMPLOSJMIQORE-XPDAHERZSA-N	CC(=O)[C@@H]1CC[C@@]2(CC[C@]3(C)C(CCC4[C@@]5(C)CC[C@H](O)C(C)(C)C5CC[C@@]34C)C12)C(O)=O	0.47485	0.0093924	1.42591
1318	Positive	6.207	407.219	low score: Lincomycin	[M+2Na-H]+	C18H34N2O6S	Proline and derivatives	OJMMVQQUTAEWLP-UHFFFAOYSA-N	CCCC1CC(N(C1)C)C(=O)NC(C2C(C(C(C(O2)SC)O)O)O)C(C)O	14.61	0.0093924	1.19437
1319	Negative	1.342	529.256	low score: NCGC00380707-01_C26H42O11_(5xi,6alpha,7alpha,9xi,16xi)-16-(beta-D-Glucopyranosyloxy)-6,7,17-trihydroxykauran-19-oic acid	[M-H]-	C26H42O11	Diterpene glycosides	QUCGBWQRLWOVBR-BBJJSLPGSA-N	C[C@]12CCC[C@@](C)(C1[C@@H](O)[C@@H](O)C34CC(CCC23)C(CO)(C4)O[C@@H]5O[C@H](CO)[C@@H](O)[C@H](O)[C@H]5O)C(O)=O	0.062706	0.0094046	1.29574
1320	Positive	11.795	538.436	Unknown	[M+H]+	null	null	null	null	0.46323	0.0094235	1.50271
1321	Positive	7.288	226.231	Unknown	[M+H]+	null	null	null	null	4.2336	0.0094235	1.33815
1322	Positive	17.973	371.127	no MS2: 1-[2-hydroxy-4-(3-hydroxy-5-methylphenoxy)-6-methylphenyl]-3-methylbutane-2,3-diol	[M+K]+	C19H24O5	Diphenylethers	FLLRZSQAKUHACV-UHFFFAOYSA-N	OC=1C=C(OC2=CC(O)=C(C(=C2)C)CC(O)C(O)(C)C)C=C(C1)C	65.263	0.0094293	1.37625
1323	Positive	14.546	567.348	Unknown	[M+H]+	null	null	null	null	0.42714	0.0094602	1.34814
1324	Positive	0.646	105.934	Unknown	[M+H]+	null	null	null	null	120.94	0.0094759	1.51898
1325	Positive	14.159	628.417	Unknown	[M+H]+	null	null	null	null	30.967	0.0094759	1.04717
1326	Positive	0.809	149.953	Unknown	[M+H]+	null	null	null	null	37.589	0.0094911	1.49651
1327	Positive	10.572	388.248	low score: (1r,5R,7S)-5,7-diethyl-2-(1-ethyl-2-methyl-1H-indol-3-yl)-1,3-diazaadamantan-6-one	[M+Na]+	C23H31N3O	N-alkylindoles	KRYFHYSXWHRZKT-BRTIRZTQSA-N	O=C1C2(CN3CC1(CN(C2)C3C=4C=5C=CC=CC5N(C4C)CC)CC)CC	0.48044	0.0094911	1.43471
1328	Positive	9.114	223.079	low score: Cystathionine	[M+H]+	C7H14N2O4S	L-cysteine-S-conjugates	ILRYLPWNYFXEMH-WHFBIAKZSA-N	OC(=O)[C@@H](N)CCSC[C@@H](N)C(O)=O	5.5723	0.0094993	1.44923
1329	Positive	14.301	387.307	low score: Bourgeanic acid	[M+H]+	C22H42O5	3-(3-hydroxyalkanoyloxy)alkanoic acids	ZQEUMOKDJCSNHB-IHRHECOVSA-N	CC[C@@H](C)C[C@@H](C)[C@@H]([C@H](C)C(=O)O[C@@H]([C@H](C)C[C@H](C)CC)[C@H](C)C(=O)O)O	62.71	0.0094993	1.34291
1330	Positive	10.398	594.416	low score: NCGC00381159-01!2-[[3,21-dihydroxy-20-[3,4,5-trihydroxy-6-(hydroxymethyl)oxan-2-yl]oxydocosan-2-yl]amino]acetic acid	[M+H]+	C30H59NO10	Fatty acyl glycosides of mono- and disaccharides	BFJZLVDYMQIIMI-UHFFFAOYSA-N	CC(O)C(CCCCCCCCCCCCCCCCC(O)C(C)NCC(O)=O)OC1OC(CO)C(O)C(O)C1O	10.458	0.0094993	0.826754
1331	Positive	6.35	130.171	low score: Octylamine	[M+H]+	C8H19N	Monoalkylamines	IOQPZZOEVPZRBK-UHFFFAOYSA-N	CCCCCCCCN	0.48085	0.009504	1.67374
1332	Positive	13.349	686.634	Unknown	[M+H]+	null	null	null	null	0.46827	0.0095041	1.50441
1333	Positive	8.534	488.3	no MS2: Aspartate conjugated cholic acid	[M-2H2O+H]+	C28H45NO8	Glycinated bile acids and derivatives	VMFFESMCXOCOIZ-NCLBRSMESA-N	C[C@H](CCC(N[C@@H](CC(O)=O)C(O)=O)=O)[C@H]1CC[C@@]2([H])[C@]3([H])[C@H](O)C[C@]4([H])C[C@H](O)CC[C@]4(C)[C@H]3C[C@H](O)[C@@]21C	10.051	0.0095296	1.26823
1334	Positive	14.46	122.105	no MS2: 2,6-Xylidine	[M+H]+	C8H11N	m-Xylenes	UFFBMTHBGFGIHF-UHFFFAOYSA-N	CC1=CC=CC(C)=C1N	14.819	0.009567	1.38879
1335	Positive	1.332	519.171	low score: Sibiricose A5	[M+H]+	C22H30O14	Coumaric acids and derivatives	ZPEADZHVGOCGKH-QIWADDKASA-N	O=C(OC1C(O)C(OC1(OC2OC(CO)C(O)C(O)C2O)CO)CO)C=CC3=CC=C(O)C(OC)=C3	40.35	0.009567	1.59452
1336	Positive	12.036	371.127	no MS2: 1-[2-hydroxy-4-(3-hydroxy-5-methylphenoxy)-6-methylphenyl]-3-methylbutane-2,3-diol	[M+K]+	C19H24O5	Diphenylethers	FLLRZSQAKUHACV-UHFFFAOYSA-N	OC=1C=C(OC2=CC(O)=C(C(=C2)C)CC(O)C(O)(C)C)C=C(C1)C	12.34	0.009567	1.32627
1337	Positive	8.504	494.289	no MS2: Sibiromycin-494 hemiaminal	[M+H]+	C25H39N3O7	Aminoglycosides	YWAXVDLXUXRDHL-NLUDKXEPSA-N	[H][C@]1(CC(CCCC)CN21)C(O)NC3=C(O)C(C)=C(O[C@@H]4O[C@@H](C)[C@H](NC)[C@@](C)(O)[C@H]4O)C=C3C2=O	10.651	0.009567	0.977957
1338	Positive	6.52	457.3	low score: NCGC00380981-01_C28H40O5_	[M+H]+	C28H40O5	Naphthopyrans	ASOIHOGDYISNRH-GPTGPEQGSA-N	CC(=O)O[C@H]1CC[C@@]2(C)[C@@H](CC[C@]3(C)[C@@H]2CC[C@]4(C)O\C5=C(/C[C@@H]34)C(=O)\C=C(C)/O5)C1(C)C	4.5581	0.0095728	1.37699
1339	Positive	10.539	524.371	LysoPC(0:0/18:0)	[M+H]+	C26H54NO7P	2-acyl-sn-glycero-3-phosphocholines	IQGPMZRCLCCXAG-RUZDIDTESA-N	CCCCCCCCCCCCCCCCCC(=O)O[C@H](CO)COP(=O)([O-])OCC[N+](C)(C)C	3.5131	0.0095728	1.30069
1340	Negative	12.561	452.052	low score: FT-sulfoxide; C12H18F7NO5S2	[M-H]-	C12H18F7NO5S2	Organosulfonic acids	SUIAJUMXBXIYHF-UHFFFAOYSA-N	O=C(NC(C)(C)CS(=O)(=O)O)CCS(=O)CCC(F)(F)C(F)(F)C(F)(F)F	2.4965	0.009576	1.25282
1341	Positive	13.226	324.247	no MS2: Melophlin B/C/G/K/L/N/O	[M+H]+	C19H33NO3	N-alkylpyrrolidines	WBPPODSRZVXVJK-MSUUIHNZSA-N	CCCCCCCCCCCC/C(O)=C(C1=O)\C(C(N1C)C)=O	0.47656	0.0096026	1.67723
1342	Positive	11.047	325.248	low score: GLYCEROL-MYRISTATE	[M+Na]+	C17H34O4	1-monoacylglycerols	DCBSHORRWZKAKO-UHFFFAOYSA-N	CCCCCCCCCCCCCC(=O)OCC(CO)O	0.47865	0.0096026	1.54935
1343	Positive	5.962	353.246	low score: "(R)-4-((3R,5S,8R,9S,10S,13R,14S,17R)-3-hydroxy-10,13-dimethyl-7-oxohexadecahydro-1H-cyclopenta[a]phenanthren-17-yl)pent-2-enoic acid"	[M-2H2O+H]+	C24H36O4	Oxosteroids	MEFHLJCGADQRRZ-NLMWUSBQSA-N	C[C@@H]([C@H]1CC[C@]2([H])[C@]1(C)CC[C@@]3([H])[C@@]2([H])C(C[C@@]4([H])[C@]3(C)CC[C@@H](O)C4)=O)/C=C/C(O)=O	40.369	0.0096026	1.45759
1344	Positive	12.455	352.347	Unknown	[M+H]+	null	null	null	null	0.47278	0.0096026	1.45726
1345	Positive	1.054	315.025	Unknown	[M+H]+	null	null	null	null	5.5378	0.0096026	1.15007
1346	Positive	18.376	663.499	Unknown	[M+H]+	null	null	null	null	3.7883	0.0096026	1.37684
1347	Positive	1.139	438.845	Unknown	[M+H]+	null	null	null	null	6.1807	0.0096026	1.18876
1348	Positive	10.489	538.395	Unknown	[M+H]+	null	null	null	null	7.1143	0.0096026	1.16906
1349	Positive	18.342	736.545	Unknown	[M+H]+	null	null	null	null	5.9239	0.0096026	1.06893
1350	Positive	16.618	594.202	Unknown	[M+H]+	null	null	null	null	11.485	0.0096026	1.00049
1351	Positive	15.276	371.126	no MS2: 1-[2-hydroxy-4-(3-hydroxy-5-methylphenoxy)-6-methylphenyl]-3-methylbutane-2,3-diol	[M+K]+	C19H24O5	Diphenylethers	FLLRZSQAKUHACV-UHFFFAOYSA-N	OC=1C=C(OC2=CC(O)=C(C(=C2)C)CC(O)C(O)(C)C)C=C(C1)C	51.261	0.0096029	1.4568
1352	Positive	10.021	510.401	Unknown	[M+H]+	null	null	null	null	0.48868	0.0096121	1.42918
1353	Positive	1.282	159.008	Unknown	[M+H]+	null	null	null	null	17.684	0.0096121	1.34237
1354	Positive	18.055	372.128	no MS2: NCGC00380360-01!7-methoxy-6-[(2S,3R,4S,5S,6R)-3,4,5-trihydroxy-6-(hydroxymethyl)oxan-2-yl]oxychromen-2-one	[M+NH4]+	C16H18O9	Coumarin glycosides	WBAVLTNIRYDCPM-YMILTQATSA-N	COC1=CC2=C(C=CC(=O)O2)C=C1O[C@@H]3O[C@H](CO)[C@@H](O)[C@H](O)[C@H]3O	46.829	0.0096121	1.33967
1355	Positive	16.502	371.129	low score: Ajugol	[M+Na]+	C15H24O9	Iridoid O-glycosides	VELYAQRXBJLJAK-XKKWFBPMSA-N	OCC1OC(OC2OC=CC3C(O)CC(O)(C)C23)C(O)C(O)C1O	62.318	0.0096128	1.39086
1356	Positive	6.08	283.196	low score: Koninginin E	[M+H]+	C16H26O4	Benzopyrans	INHVGPIPHZJQOP-ZNMIVQPWSA-N	CCCCCC[C@@H]([C@@H]1CCC2=C(O1)[C@@H](CCC2=O)O)O	2.3983	0.0096143	1.49542
1357	Positive	12.617	207.188	Unknown	[M+H]+	null	null	null	null	3.7144	0.0096254	1.38822
1358	Positive	18.032	984.329	Unknown	[M+H]+	null	null	null	null	9.4302	0.009636	0.990789
1359	Positive	6.225	437.267	low score: tBuO-Glu(Ome)-Val-hexanoate	[M+2Na-H]+	C21H38N2O6	Peptides	KMRMSYHYOVGWCM-UHFFFAOYSA-N	CCCCCC(NC(C(C)C)C(NC(CCC(OC)=O)C(OC(C)(C)C)=O)=O)=O	47.217	0.0096684	1.25736
1360	Positive	6.916	533.374	low score: Alisol A,24-acetate	[M+H]+	C32H52O6	Triterpenoids	WXHUQVMHWUQNTG-JSWHPQHOSA-N	O=C(OC(C(O)CC(C1=C2CC(O)C3C4(C)CCC(=O)C(C)(C)C4CCC3(C)C2(C)CC1)C)C(O)(C)C)C	0.013734	0.0096684	1.23761
1361	Positive	12.599	171.109	no MS2: Levetiracetam	[M+H]+	C8H14N2O2	Alpha amino acids and derivatives	HPHUVLMMVZITSG-LURJTMIESA-N	O=C1N(CCC1)C(C(=N)O)CC	22.312	0.0096839	1.35456
1362	Positive	14.145	670.528	Unknown	[M+H]+	null	null	null	null	0.3996	0.0097021	1.50238
1363	Positive	10.477	622.418	Unknown	[M+H]+	null	null	null	null	3.9438	0.0097156	0.914367
1364	Positive	0.207	122.096	no MS2: 2,6-Xylidine	[M+H]+	C8H11N	m-Xylenes	UFFBMTHBGFGIHF-UHFFFAOYSA-N	CC1=CC=CC(C)=C1N	11.158	0.0097473	1.25729
1365	Positive	7.374	230.27	Unknown	[M+H]+	null	null	null	null	0.47211	0.0097473	1.67782
1366	Positive	1.19	538.32	low score: "2-((6R)-3-hydroxy-2-methyl-6-((3R,5S,7R,8R,9S,10S,12S,13R,14S,17R)-3,7,12-trihydroxy-10,13-dimethylhexadecahydro-1H-cyclopenta[a]phenanthren-17-yl)heptanamido)ethane-1-sulfonic acid"	[M-2H2O+H]+	C29H51NO8S	Taurinated bile acids and derivatives	IRLLPYQZIDZRPZ-SWFRYIAXSA-N	C[C@@H]([C@H]1CC[C@]2([H])[C@]1(C)[C@@H](O)C[C@@]3([H])[C@@]2([H])[C@H](O)C[C@@]4([H])[C@]3(C)CC[C@@H](O)C4)CCC(O)C(C)C(NCCS(=O)(O)=O)=O	0.0065	0.0097473	1.22175
1367	Negative	6.59	528.233	Unknown	[M-H]-	null	null	null	null	0.12906	0.0097473	1.27227
1368	Positive	8.382	282.298	Unknown	[M+H]+	null	null	null	null	8.3183	0.00977	1.54679
1369	Positive	6.429	369.238	low score: 5-(3-methoxyphenyl)-N-((octahydro-1H-quinolizin-1-yl)methyl)-1H-pyrazole-3-carboxamide	[M+H]+	C21H28N4O2	Phenylpyrazoles	ZZFSKJIAKIBPSR-UHFFFAOYSA-N	O=C(NCC1CCCN2CCCCC21)C3=NNC(=C3)C=4C=CC=C(OC)C4	2.782	0.00977	1.39439
1370	Positive	1.294	561.4	low score: Diacetylpyxinol	[M+H]+	C34H56O6	Triterpene saponins	TWRWTOXPYGQKPW-ZWXXETMRSA-N	CC1(C(C2(CCC1OC(C)=O)C)CCC3(C2CC(O)C4[C@]3(CCC4[C@]5(C)O[C@@H](C(C)(OC(C)=O)C)CC5)C)C)C	0.20073	0.0097709	1.13791
1371	Positive	1.166	366.861	Unknown	[M+H]+	null	null	null	null	3.8462	0.0097771	1.12795
1372	Positive	0.635	104.016	Unknown	[M+H]+	null	null	null	null	67.167	0.0097771	1.38816
1373	Positive	0.67	379.814	Unknown	[M+H]+	null	null	null	null	144.3	0.0097771	1.55052
1374	Positive	1.121	136.087	Unknown	[M+H]+	null	null	null	null	11.202	0.0097771	1.52153
1375	Positive	17.897	982.326	Unknown	[M+H]+	null	null	null	null	11.552	0.0097771	0.918402
1376	Positive	11.314	468.421	Unknown	[M+H]+	null	null	null	null	2.2527	0.0098104	1.08977
1377	Positive	8.025	421.348	Unknown	[M+H]+	null	null	null	null	0.48536	0.0098183	1.67773
1378	Positive	1.132	219.026	no MS2: NCGC00380969-01_C11H7ClN2O_3-(4-Chloro-1,3-oxazol-5-yl)-1H-indole	[M+H]+	C11H7ClN2O	Indoles	BKYJGKRXUHPPLR-UHFFFAOYSA-N	[Cl]C1=C(OC=N1)C2=C[NH]C3=C2C=CC=C3	11.723	0.0098183	0.830088
1379	Positive	15.51	739.671	low score: (2E,6E)-3,7,11,15,19,23,27,31,35-nonamethylhexatriaconta-2,6,34-triene-1,11,15,19,23,27,31-heptol	[M+H]+	C45H86O7	Polyprenols	FPJJIWCMASJCHO-NXRGQNTBSA-N	OCC=C(C)CCC=C(C)CCCC(O)(C)CCCC(O)(C)CCCC(O)(C)CCCC(O)(C)CCCC(O)(C)CCCC(O)(C)CCC=C(C)C	0.45741	0.0098183	1.47002
1380	Positive	8.758	518.359	Unknown	[M+H]+	null	null	null	null	14.117	0.0098183	1.42573
1381	Positive	14.32	445.153	no MS2: Piptocarphin A	[M+Na]+	C21H26O9	Tricarboxylic acids and derivatives	BZQDHZDSIXPDSS-CYDVCVIESA-N	O=C1C(COC(C)=O)=C2[C@@H](OC(C(C)=C)=O)C[C@@](C)(O)[C@@](O)(O3)CC[C@]3(C)/C=C2/O1	6.9243	0.0098183	1.22494
1382	Positive	14.308	275.278	Unknown	[M+H]+	null	null	null	null	4.9121	0.0098272	1.61185
1383	Positive	1.15	676.228	Unknown	[M+H]+	null	null	null	null	0.005937	0.0098335	1.27431
1384	Positive	7.359	387.218	low score: Sufentanil	[M+H]+	C22H30N2O2S	Anilides	GGCSSNBKKAUURC-UHFFFAOYSA-N	[H]C([H])([H])OC([H])([H])C(N(C(=O)C([H])([H])C([H])([H])[H])c(c([H])3)c([H])c([H])c([H])c([H])3)(C([H])([H])1)C([H])([H])C([H])([H])N(C([H])([H])C([H])([H])c(s2)c([H])c([H])c([H])2)C([H])([H])1	0.48232	0.0098335	1.60848
1385	Positive	18.355	599.554	Unknown	[M+H]+	null	null	null	null	0.4524	0.0098335	1.2485
1386	Positive	1.039	384.998	no MS2: Ethion	[M+H]+	C9H22O4P2S4	Dithiophosphate O-esters	RIZMRRKBZQXFOY-UHFFFAOYSA-N	CCOP(=S)(OCC)SCSP(=S)(OCC)OCC	2.2977	0.0098335	1.22379
1387	Negative	1.173	628.157	Unknown	[M-H]-	null	null	null	null	0.02368	0.0098335	1.2074
1388	Positive	0.06	281.071	no MS2: Yangonin	[M+Na]+	C15H14O4	Kavalactones	XLHIYUYCSMZCCC-VMPITWQZSA-N	O=C1OC(C=CC2=CC=C(OC)C=C2)=CC(OC)=C1	4.3326	0.0098471	1.54287
1389	Positive	15.518	381.33	Unknown	[M+H]+	null	null	null	null	0.44809	0.009848	1.49149
1390	Positive	1.12	736.197	no MS2: NCGC00380524-01!(2R)-2-[(E)-3-[3-[(1R)-1-carboxy-2-(3,4-dihydroxyphenyl)ethoxy]carbonyl-2-(3,4-dihydroxyphenyl)-7-hydroxy-2,3-dihydro-1-benzofuran-4-yl]prop-2-enoyl]oxy-3-(3,4-dihydroxyphenyl)propanoic acid	[M+NH4]+	C36H30O16	2-arylbenzofuran flavonoids	SNKFFCBZYFGCQN-FTNWOIIGSA-N	OC(=O)[C@@H](CC1=CC=C(O)C(O)=C1)OC(=O)\C=C\C2=CC=C(O)C3=C2C(C(O3)C4=CC=C(O)C(O)=C4)C(=O)O[C@H](CC5=CC(O)=C(O)C=C5)C(O)=O	0.008573	0.0098498	1.20507
1391	Positive	0.748	113.972	Unknown	[M+H]+	null	null	null	null	47.107	0.0098584	1.45176
1392	Positive	7.919	223.079	low score: Cystathionine	[M+H]+	C7H14N2O4S	L-cysteine-S-conjugates	ILRYLPWNYFXEMH-WHFBIAKZSA-N	OC(=O)[C@@H](N)CCSC[C@@H](N)C(O)=O	14.968	0.0098584	1.46803
1393	Positive	0.637	121.984	Unknown	[M+H]+	null	null	null	null	52.382	0.0098595	1.49506
1394	Positive	12.294	405.357	low score: pentacosanoic acid	[M+Na]+	C25H50O2	Very long-chain fatty acids	MWMPEAHGUXCSMY-UHFFFAOYSA-N	O=C(O)CCCCCCCCCCCCCCCCCCCCCCCC	0.46952	0.0098619	1.59442
1395	Positive	1.027	542.962	Unknown	[M+H]+	null	null	null	null	30.342	0.0098678	1.50408
1396	Negative	1.31	638.108	Unknown	[M-H]-	null	null	null	null	0.075863	0.0098831	1.17218
1397	Positive	6.019	261.149	low score: Isoleucylglutamate	[M+H]+	C11H20N2O5	Dipeptides	KTGFOCFYOZQVRJ-UHFFFAOYSA-N	O=C(O)CCC(NC(=O)C(N)C(C)CC)C(=O)O	16.154	0.009928	1.31583
1398	Positive	6.429	391.223	5-(3-methoxyphenyl)-N-((octahydro-1H-quinolizin-1-yl)methyl)-1H-pyrazole-3-carboxamide	[M+Na]+	C21H28N4O2	Phenylpyrazoles	ZZFSKJIAKIBPSR-UHFFFAOYSA-N	O=C(NCC1CCCN2CCCCC21)C3=NNC(=C3)C=4C=CC=C(OC)C4	6.1062	0.009928	1.31801
1399	Positive	14.841	760.666	Unknown	[M+H]+	null	null	null	null	0.43551	0.009928	1.34996
1400	Positive	1.193	792.151	Unknown	[M+H]+	null	null	null	null	0.033465	0.009928	1.15554
1401	Positive	11.062	100.083	N-Methyl-2-pyrrolidone	[M+H]+	C5H9NO	N-alkylpyrrolidines	SECXISVLQFMRJM-UHFFFAOYSA-N	CN1CCCC1=O	15.299	0.0099356	1.59729
1402	Positive	7.143	100.083	no MS2: 2-Piperidone; CE0; XUWHAWMETYGRKB-UHFFFAOYSA-N	[M+H]+	C5H9NO	Piperidinones	XUWHAWMETYGRKB-UHFFFAOYSA-N	C1CCN=C(C1)O	11.475	0.0099356	1.55413
1403	Positive	0.437	260.907	Unknown	[M+H]+	null	null	null	null	30.126	0.0099356	1.38175
1404	Positive	1.39	115.967	Unknown	[M+H]+	null	null	null	null	53.358	0.0099356	1.49249
1405	Positive	0.743	116.98	Unknown	[M+H]+	null	null	null	null	16.913	0.0099356	1.44839
1406	Positive	0.748	128.96	Unknown	[M+H]+	null	null	null	null	178.33	0.0099356	1.57402
1407	Positive	17.761	492.446	Unknown	[M+H]+	null	null	null	null	0.45828	0.0099356	1.54159
1408	Positive	6.152	386.267	low score: Buspirone	[M+H]+	C21H31N5O2	N-arylpiperazines	QWCRAEMEVRGPNT-UHFFFAOYSA-N	O=C1CC2(CCCC2)CC(=O)N1CCCCN1CCN(CC1)C1=NC=CC=N1	4.6082	0.0099356	1.47064
1409	Positive	6.44	399.258	low score: Tri(butoxyethyl) phosphate	[M+H]+	C18H39O7P	Trialkyl phosphates	WTLBZVNBAKMVDP-UHFFFAOYSA-N	CCCCOCCOP(=O)(OCCOCCCC)OCCOCCCC	5.3611	0.0099356	1.43648
1410	Positive	0.702	361.848	Unknown	[M+H]+	null	null	null	null	34.804	0.0099356	1.42715
1411	Positive	10.118	365.164	low score: 7,8-Dihydroxy calonectrin	[M-H2O+H]+	C19H26O8	Trichothecenes	JSKXQQKSUOVSKS-UHFFFAOYSA-N	CC1=CC2C(C(C1O)O)(C3(CC(C(C34CO4)O2)OC(=O)C)C)COC(=O)C	3.8977	0.0099356	0.996998
1412	Positive	0.321	488.436	Unknown	[M+H]+	null	null	null	null	0.47299	0.0099356	1.32891
1413	Positive	6.496	466.295	low score: taurolithocholic acid	[M-H2O+H]+	C26H45NO5S	Taurinated bile acids and derivatives	QBYUNVOYXHFVKC-RQAFQGPPSA-N	C[C@H](CCC(=O)NCCS(=O)(=O)O)[C@H]1CC[C@@H]2[C@@]1(CC[C@H]3[C@H]2CC[C@H]4[C@@]3(CC[C@H](C4)O)C)C	33.741	0.0099356	1.30387
1414	Positive	6.18	393.238	low score: monolinolein	[M+2Na-H]+	C21H38O4	Lineolic acids and derivatives	WECGLUPZRHILCT-HZJYTTRNSA-N	O=C(OCC(O)CO)CCCCCCCC=CCC=CCCCCC	36.112	0.0099356	1.28234
1415	Positive	16.931	445.15	no MS2: Piptocarphin A	[M+Na]+	C21H26O9	Tricarboxylic acids and derivatives	BZQDHZDSIXPDSS-CYDVCVIESA-N	O=C1C(COC(C)=O)=C2[C@@H](OC(C(C)=C)=O)C[C@@](C)(O)[C@@](O)(O3)CC[C@]3(C)/C=C2/O1	12.491	0.0099356	1.24367
1416	Positive	1.192	670.762	Unknown	[M+H]+	null	null	null	null	7.2588	0.0099356	1.24278
1417	Positive	1.062	672.908	Unknown	[M+H]+	null	null	null	null	3.4627	0.0099356	1.13977
1418	Positive	9.159	605.346	Unknown	[M+H]+	null	null	null	null	2.8422	0.0099356	1.08885
1419	Positive	9.216	654.444	low score: Enniatin B1	[M+H]+	C34H59N3O9	Cyclic depsipeptides	UQCSETXJXJTMKO-UMURLBKASA-N	CC[C@H](C)[C@H]1C(=O)O[C@@H](C(=O)N([C@H](C(=O)O[C@@H](C(=O)N([C@H](C(=O)O[C@@H](C(=O)N1C)C(C)C)C(C)C)C)C(C)C)C(C)C)C)C(C)C	14.746	0.0099356	0.898597
1420	Positive	10.222	605.352	Unknown	[M+H]+	null	null	null	null	49.616	0.0099356	1.04013
1421	Positive	9.073	546.395	Unknown	[M+H]+	null	null	null	null	3.0006	0.0099356	1.01381
1422	Positive	8.482	473.297	low score: NCGC00347850-02_C26H42O6_2-(4a-Methyl-8-methylenedecahydro-2-naphthalenyl)-2-propanyl 6-deoxy-2-O-[(2E)-2-methyl-2-butenoyl]hexopyranoside	[M+Na]+	C26H42O6	Eudesmane, isoeudesmane or cycloeudesmane sesquiterpenoids	QKRNXYDUTFTSBG-NVNXTCNLSA-N	C\C=C(\C)C(=O)OC1C(O)C(O)C(C)OC1OC(C)(C)C2CCC3(C)CCCC(=C)C3C2	15.873	0.0099356	0.923312
1423	Positive	18.358	859.602	Unknown	[M+H]+	null	null	null	null	0.43302	0.0099356	1.36023
1424	Positive	7.102	970.888	Unknown	[M+H]+	null	null	null	null	0.47046	0.0099356	1.55077
1425	Positive	8.975	997.691	Unknown	[M+H]+	null	null	null	null	28.383	0.0099356	0.946374
1426	Negative	1.026	724.162	Unknown	[M-H]-	null	null	null	null	0.33107	0.0099356	1.14921
1427	Negative	1.014	786.2	Unknown	[M-H]-	null	null	null	null	0.48424	0.0099356	0.909679
1428	Positive	0.614	114.101	low score: Unknown (carbon number 6); PlaSMA ID-45	[M+H]+	C6H11NO	Unknown	null	null	4.6649	0.0099518	1.58861
1429	Positive	0.583	104.016	Unknown	[M+H]+	null	null	null	null	70.786	0.0099666	1.35707
1430	Positive	1.069	215.139	no MS2: DETHIOBIOTIN	[M+H]+	C10H18N2O3	Medium-chain fatty acids	AUTOLBMXDDTRRT-JGVFFNPUSA-N	C[C@H]1[C@H](NC(=O)N1)CCCCCC(=O)O	3.3805	0.009968	1.38296
1431	Positive	7.916	228.217	Unknown	[M+H]+	null	null	null	null	0.49897	0.0099769	1.54691
1432	Positive	0.483	288.856	Unknown	[M+H]+	null	null	null	null	149.66	0.0099943	1.57915
1433	Positive	6.218	464.301	no MS2: "((R)-4-((3R,5R,6S,7R,8S,9S,10R,13R,14S,17R)-3,6,7-trihydroxy-10,13-dimethylhexadecahydro-1H-cyclopenta[a]phenanthren-17-yl)pent-2-enoyl)glycine"	[M+H]+	C26H41NO6	Glycinated bile acids and derivatives	XZDJHXFLHVJPMG-TUWKBOJTSA-N	C[C@@H]([C@H]1CC[C@]2([H])[C@]1(C)CC[C@@]3([H])[C@@]2([H])[C@@H](O)[C@@H](O)[C@@]4([H])[C@]3(C)CC[C@@H](O)C4)/C=C/C(NCC(O)=O)=O	2.9555	0.010018	0.994227
1434	Positive	6.443	354.274	low score: 14-hydroxy-14-(hydroxymethyl)-5,9-dimethyltetracyclo[11.2.1.0?,??.0?,?]hexadecane-5-carboxylic acid	[M+NH4]+	C20H32O4	Kaurane diterpenoids	MRBLTWPEPGRXQN-UHFFFAOYSA-N	O=C(O)C1(C)CCCC2(C)C1CCC34CC(CCC32)C(O)(CO)C4	4.8379	0.010049	1.49485
1435	Positive	1.32	412.337	Unknown	[M+H]+	null	null	null	null	0.13479	0.010049	1.26326
1436	Positive	9.351	616.295	low score: NCGC00381001-01_C32H41NO11_	[M+H]+	C32H41NO11	Glutamic acid and derivatives	AAIIJIOWYALNCC-PPNZYPONSA-N	C[C@@H]1CCC2C(C)(C)[C@H](OC(C)=O)[C@@H](C[C@]2(C)[C@@]13CC4=C(O3)C5=C(C=C4O)C(=O)N(C5)[C@@H](CCC(O)=O)C(O)=O)OC(C)=O	22.253	0.01005	1.429
1437	Positive	1.114	476.964	Unknown	[M+H]+	null	null	null	null	2.9617	0.010085	1.22203
1438	Positive	13.038	457.381	Unknown	[M+H]+	null	null	null	null	16.947	0.010091	1.41175
1439	Positive	8.576	621.342	low score: NCGC00381318-01![3-methyl-1-[3-methyl-1-[3-methyl-1-oxo-1-(2,3,4,5,6-pentahydroxyhexoxy)pentan-2-yl]oxy-1-oxopentan-2-yl]oxy-1-oxopentan-2-yl] 2-hydroxy-3-methylpentanoate [IIN-based on: CCMSLIB00000845116]	[M-H2O+H]+	C30H54O14	Depsipeptides	XHFZCGJKWBSHAG-UHFFFAOYSA-N	CCC(C)C(O)C(=O)OC(C(C)CC)C(=O)OC(C(C)CC)C(=O)OC(C(C)CC)C(=O)OCC(O)C(O)C(O)C(O)CO	5.7635	0.010099	1.21158
1440	Positive	12.62	157.096	no MS2: Unknown (carbon number 8); PlaSMA ID-276	[M+H]+	C8H12O3	Unknown	null	null	3.8461	0.010099	1.37938
1441	Positive	12.296	450.418	Unknown	[M+H]+	null	null	null	null	0.46935	0.010099	1.53193
1442	Positive	11.628	427.333	low score: "methyl (6R,E)-2-methyl-6-((3R,5S,7R,9S,10S,12S,13R,14S,17R)-3,7,12-trihydroxy-10,13-dimethylhexadecahydro-1H-cyclopenta[a]phenanthren-17-yl)hept-2-enoate"	[M-2H2O+H]+	C28H46O5	Trihydroxy bile acids, alcohols and derivatives	SZDHRKMCESZUCV-WKGGVHHNSA-N	[H][C@@]12[C@H](O)C[C@@H]3C[C@H](O)CC[C@]3(C)[C@H]1C[C@H](O)[C@@]4(C)[C@H]2CC[C@@H]4[C@@H](CC/C=C(C)/C(OC)=O)C	23.357	0.010103	1.40828
1443	Positive	8.746	826.046	Unknown	[M+H]+	null	null	null	null	0.47749	0.010127	1.39131
1444	Negative	1.06	826.097	Unknown	[M-H]-	null	null	null	null	0.38744	0.010132	1.02538
1445	Positive	0.563	278.821	Unknown	[M+H]+	null	null	null	null	83.236	0.01014	1.53644
1446	Positive	10.488	223.082	no MS2: 2-methylanthra-9,10-quinone	[M+H]+	C15H10O2	Anthraquinones	NJWGQARXZDRHCD-UHFFFAOYSA-N	O=C1C=2C=CC=CC2C(=O)C3=CC(=CC=C13)C	4.7428	0.01014	1.50419
1447	Positive	10.285	624.432	Unknown	[M+H]+	null	null	null	null	5.1136	0.01014	1.31203
1448	Positive	13.818	297.261	no MS2: 2-(N-butylpropionamido)-N-cyclohexylbutanamide	[M+H]+	C17H32N2O2	Tertiary carboxylic acid amides	QMXGNDITXNMQEK-UHFFFAOYSA-N	CCCCN(C(=O)CC)C(CC)C(=O)NC1CCCCC1	18.134	0.010141	1.52713
1449	Positive	13.934	381.325	Unknown	[M+H]+	null	null	null	null	30.283	0.010145	1.27002
1450	Positive	6.299	548.403	Unknown	[M+H]+	null	null	null	null	7.3726	0.010151	1.2746
1451	Positive	8.625	526.337	low score: NCGC00380724-01_C28H47NO8_(3R,5R,6S,7S,9R,11E,13S,14R)-14-Ethyl-13-hydroxy-3,5,7,9,13-pentamethyl-2,4,10-trioxooxacyclotetradec-11-en-6-yl 3,4,6-trideoxy-3-(dimethylamino)-D-xylo-hexopyranoside	[M+H]+	C28H47NO8	Aminoglycosides	UZQBOFAUUTZOQE-SOSMEOBRSA-N	CC[C@H]1OC(=O)[C@H](C)C(=O)[C@H](C)[C@@H](OC2O[C@H](C)C[C@@H]([C@H]2O)N(C)C)[C@@H](C)C[C@@H](C)C(=O)\C=C\[C@]1(C)O	0.46486	0.010156	1.34066
1452	Positive	0.7	112.964	Unknown	[M+H]+	null	null	null	null	65.005	0.010156	1.44731
1453	Positive	17.811	416.41	Unknown	[M+H]+	null	null	null	null	0.47176	0.010156	1.59234
1454	Positive	0.597	209.935	Unknown	[M+H]+	null	null	null	null	51.039	0.010156	1.44378
1455	Positive	9.246	755.055	Unknown	[M+H]+	null	null	null	null	0.44585	0.010156	1.40771
1456	Positive	15.076	568.607	Unknown	[M+H]+	null	null	null	null	7.1526	0.010156	1.1006
1457	Positive	9.025	521.176	Unknown	[M+H]+	null	null	null	null	7.2593	0.010156	0.971213
1458	Positive	13.309	790.618	low score: (2-{[2,3-di(octadecanoyloxy)propyl phosphonato]oxy}ethyl)trimethylazanium	[M+H]+	C44H88NO8P	Phosphatidylcholines	NRJAVPSFFCBXDT-UHFFFAOYSA-N	CCCCCCCCCCCCCCCCCC(=O)OCC(COP(=O)([O-])OCC[N+](C)(C)C)OC(=O)CCCCCCCCCCCCCCCCC	7.5818	0.010166	1.19159
1459	Negative	1.105	756.11	Unknown	[M-H]-	null	null	null	null	0.24064	0.010166	1.12484
1460	Positive	0.519	172.966	Unknown	[M+H]+	null	null	null	null	225.12	0.010169	1.48529
1461	Positive	0.503	154.977	Unknown	[M+H]+	null	null	null	null	11.741	0.010179	1.45712
1462	Positive	10.472	524.843	Unknown	[M+H]+	null	null	null	null	6.6502	0.010212	1.27631
1463	Positive	0.444	296.885	Unknown	[M+H]+	null	null	null	null	50.589	0.010216	1.30682
1464	Positive	1.227	192.025	Unknown	[M+H]+	null	null	null	null	3.2316	0.01022	1.17959
1465	Positive	7.969	219.063	low score: Hydroxytyrosol Acetate	[M+Na]+	C10H12O4	Tyrosols and derivatives	FGJGLFPNIZXRLV-UHFFFAOYSA-N	O=C(OCCC1=CC=C(O)C(O)=C1)C	94.722	0.01022	1.47615
1466	Positive	9.012	314.053	low score: Isazofos	[M+H]+	C9H17ClN3O3PS	Aryl thiophosphates	XRHGWAGWAHHFLF-UHFFFAOYSA-N	CCOP(=S)(OCC)OC1=NN(C(C)C)C(Cl)=N1	31.816	0.01022	1.45226
1467	Positive	6.504	493.265	low score: 3Beta-Hydroxydeoxodihydrodeoxygedunin	[M+Na]+	C28H38O6	Naphthopyrans	FJIIOEQLAAKWEL-VISHRWGOSA-N	O=C1OC(C2=COC=C2)C3(C(=C1)C4(C)C(OC(=O)C)CC5C(C)(C)C(O)CCC5(C)C4CC3)C	7.0965	0.01022	1.06873
1468	Positive	11.921	854.614	Unknown	[M+H]+	null	null	null	null	3.3656	0.01022	1.22726
1469	Positive	6.261	114.103	no MS2: Unknown (carbon number 6); PlaSMA ID-45	[M+H]+	C6H11NO	Unknown	null	null	3.8938	0.010222	1.67565
1470	Positive	17.639	623.502	Unknown	[M+H]+	null	null	null	null	0.42629	0.010222	1.19041
1471	Negative	1.15	616.159	Unknown	[M-H]-	null	null	null	null	0.099475	0.010225	1.17244
1472	Positive	1.131	671.283	no MS2: 3,5,7,15-tetraacetoxy-2-hydroxy-8-tigloyloxy-9,14-dioxojatropha-6(17),11E-diene	[M+Na]+	C33H44O13	Jatrophane and cyclojatrophane diterpenoids	OACSANJOUKCFPQ-RTPYZGGESA-N	C=C([C@@H]1OC(C)=O)[C@H](OC(C)=O)[C@@H](OC(/C(C)=C/C)=O)C(C(C)(C)/C=C/[C@@H](C)C([C@]2(OC(C)=O)[C@]1([H])[C@@H](OC(C)=O)[C@](C)(O)C2)=O)=O	0.0093207	0.010265	1.27793
1473	Positive	12.562	297.26	no MS2: 2-(N-butylpropionamido)-N-cyclohexylbutanamide	[M+H]+	C17H32N2O2	Tertiary carboxylic acid amides	QMXGNDITXNMQEK-UHFFFAOYSA-N	CCCCN(C(=O)CC)C(CC)C(=O)NC1CCCCC1	10.505	0.010265	1.56465
1474	Positive	9.447	510.36	1-heptadecanoyl-2-hydroxy-sn-glycero-3-phosphocholine	[M+H]+	C25H52NO7P	1-acyl-sn-glycero-3-phosphocholines	SRRQPVVYXBTRQK-XMMPIXPASA-N	[H][C@@](O)(COC(=O)CCCCCCCCCCCCCCCC)COP([O-])(=O)OCC[N+](C)(C)C	5.1687	0.010265	0.818665
1475	Positive	17.832	985.325	Unknown	[M+H]+	null	null	null	null	11.022	0.010265	1
1476	Positive	1.187	148.054	low score: L-Glutamic acid; CE0; WHUUTDBJXJRKMK-VKHMYHEASA-N	[M+H]+	C5H9NO4	Glutamic acid and derivatives	WHUUTDBJXJRKMK-VKHMYHEASA-N	C(CC(=O)O)[C@@H](C(=O)O)N	0.49507	0.01027	1.34751
1477	Positive	8.989	498.97	Unknown	[M+H]+	null	null	null	null	25.817	0.01027	1.48672
1478	Positive	12.314	255.25	Unknown	[M+H]+	null	null	null	null	5.2866	0.01027	1.04659
1479	Positive	11.058	538.425	Unknown	[M+H]+	null	null	null	null	6.8193	0.01027	1.35448
1480	Positive	1.114	702.695	Unknown	[M+H]+	null	null	null	null	9.471	0.01027	1.19698
1481	Positive	1.68	114.102	low score: Unknown (carbon number 6); PlaSMA ID-45	[M+H]+	C6H11NO	Unknown	null	null	4.4462	0.010276	1.62989
1482	Positive	13.405	327.314	Unknown	[M+H]+	null	null	null	null	10.083	0.010276	1.139
1483	Positive	1.177	600.708	Unknown	[M+H]+	null	null	null	null	8.0686	0.010276	1.15397
1484	Positive	1.182	515.36	low score: 3-O-Acetyl-16alpha-hydroxytrametenolic acid	[M+NH4]+	C32H50O5	Triterpenoids	SRDNLMOBFKJOSD-KOCSMGCBSA-N	O=C(OC1CCC2(C3=C(CCC2C1(C)C)C4(C)CC(O)C(C(C(=O)O)CCC=C(C)C)C4(C)CC3)C)C	0.022187	0.010276	1.11984
1485	Positive	0.536	132.941	Unknown	[M+H]+	null	null	null	null	88.152	0.010339	1.45924
1486	Positive	8.124	437.232	low score: Nonaethylene glycol	[M+Na]+	C18H38O10	Polyethylene glycols	YZUUTMGDONTGTN-UHFFFAOYSA-N	OCCOCCOCCOCCOCCOCCOCCOCCOCCO	0.42089	0.010345	1.48544
1487	Positive	6.363	347.193	low score: NCGC00384746-01!6-(2,3-dihydroxy-3-methylbutyl)-7-methoxy-3-(2-methylbut-3-en-2-yl)chromen-2-one [IIN-based: Match]	[M+H]+	C20H26O5	Coumarins and derivatives	JMIHHZJRBXJKLS-UHFFFAOYSA-N	COC1=C(CC(O)C(C)(C)O)C=C2C=C(C(=O)OC2=C1)C(C)(C)C=C	4.024	0.010345	1.16009
1488	Positive	6.18	416.314	Unknown	[M+H]+	null	null	null	null	14.65	0.010346	1.46317
1489	Positive	0.727	114.102	low score: Unknown (carbon number 6); PlaSMA ID-45	[M+H]+	C6H11NO	Unknown	null	null	4.1571	0.010349	1.62873
1490	Positive	0.378	786.667	Unknown	[M+H]+	null	null	null	null	0.34912	0.010355	1.21311
1491	Positive	9.951	330.368	Unknown	[M+H]+	null	null	null	null	0.47925	0.010391	1.6956
1492	Positive	1.233	471.092	no MS2: 4-(3,7-diacetoxy-5-hydroxy-4-oxo-4H-chromen-2-yl)-1,2-phenylene diacetate	[M+H-2H2O]+	C23H18O11	Flavones	RCPLKIFASQXUES-UHFFFAOYSA-N	O=C(OC=1C=C(O)C=2C(=O)C(OC(=O)C)=C(OC2C1)C=3C=CC(OC(=O)C)=C(OC(=O)C)C3)C	3.0354	0.010391	1.10662
1493	Positive	9.001	756.055	Unknown	[M+H]+	null	null	null	null	6.6399	0.0104	1.46636
1494	Positive	1.166	484.786	Unknown	[M+H]+	null	null	null	null	5.6215	0.0104	1.14215
1495	Positive	14.335	136.032	no MS2: 2-Benzoxazolinone; CE0; ASSKVPFEZFQQNQ-UHFFFAOYSA-N	[M+H]+	C7H5NO2	Benzoxazolones	ASSKVPFEZFQQNQ-UHFFFAOYSA-N	c1ccc2c(c1)nc(O)o2	2.5686	0.010401	1.49148
1496	Positive	14.345	355.308	Unknown	[M+H]+	null	null	null	null	5.3014	0.010405	1.23602
1497	Positive	7.735	228.164	low score: C8-homoserine lactone	[M+H]+	C12H21NO3	N-acyl-alpha amino acids and derivatives	JKEJEOJPJVRHMQ-UHFFFAOYSA-N	CCCCCCCC(=O)NC1CCOC1=O	7.136	0.010415	1.23499
1498	Positive	12.733	263.255	Unknown	[M+H]+	null	null	null	null	23.009	0.010415	1.15184
1499	Positive	12.591	298.292	low score: Unknown (carbon number 17); PlaSMA ID-1541	[M+H]+	C17H35N3O	Unknown	null	null	3.9276	0.010435	1.05477
1500	Positive	8.999	527.362	low score: hemiasterlin	[M+H]+	C30H46N4O4	Dipeptides	KQODQNJLJQHFQV-MNDPQUGUSA-N	CC(C(N(C(C(NC(C(NC)C(C)(C(C1=CC=CC=C12)=CN2C)C)=O)C(C)(C)C)=O)C)/C=C(C(O)=O)/C)C	9.1789	0.010436	1.49356
1501	Positive	14.302	439.287	low score: (2E,4E,6E,8E,10E,12E,14E,16E)-2,6,11,15-tetramethyl-17-(2,6,6-trimethyl-1-cyclohexen-1-yl)-2,4,6,8,10,12,14,16-heptadecaoctaenal	[M+Na]+	C30H40O	Triterpenoids	DFMMVLFMMAQXHZ-DOKBYWHISA-N	O=CC(=CC=CC(=CC=CC=C(C=CC=C(C=CC1=C(C)CCCC1(C)C)C)C)C)C	47.447	0.010436	1.48628
1502	Positive	18.078	371.127	no MS2: 1-[2-hydroxy-4-(3-hydroxy-5-methylphenoxy)-6-methylphenyl]-3-methylbutane-2,3-diol	[M+K]+	C19H24O5	Diphenylethers	FLLRZSQAKUHACV-UHFFFAOYSA-N	OC=1C=C(OC2=CC(O)=C(C(=C2)C)CC(O)C(O)(C)C)C=C(C1)C	60.698	0.01044	1.31788
1503	Positive	0.062	283.069	no MS2: Niflumic acid	[M+H]+	C13H9F3N2O2	Trifluoromethylbenzenes	JZFPYUNJRRFVQU-UHFFFAOYSA-N	C1(C(=CC=CN=1)C(=O)O)NC2C=C(C=CC=2)C(F)(F)F	3.3346	0.010456	1.49846
1504	Positive	17.754	446.152	no MS2: 2-((13-allyl-8-oxo-8H-benzo[c]indolo[3,2,1-ij][1,5]naphthyridin-12-yl)oxy)-N-cyclopropylacetamide	[M+Na]+	C26H21N3O3	Indolonaphthyridine alkaloids	BAVIFLQGTGNVOP-UHFFFAOYSA-N	O=C(NC1CC1)COC2=CC=C3C(C=4C=CN=C5C=6C=CC=CC6C(=O)N3C54)=C2CC=C	9.7774	0.010456	1.14511
1505	Positive	6.557	419.254	low score: Ophiopogonoside A	[M+H]+	C21H38O8	Terpene glycosides	DQRUOTCFENUXKV-UHFFFAOYSA-N	OCC1OC(OC2C(CCC3(C)C(O)CCC(O)(C)C23)C(C)C)C(O)C(O)C1O	23.088	0.010468	1.26259
1506	Positive	6.236	312.225	low score: (1-Pentyl-1H-indol-3-yl)(2,2,3,3-tetramethylcyclopropyl)methanone	[M+H]+	C21H29NO	N-alkylindoles	NBMMIBNZVQFQEO-UHFFFAOYSA-N	CCCCCN1C=C(C2=CC=CC=C21)C(=O)C3C(C3(C)C)(C)C	3.8761	0.010493	1.49926
1507	Positive	10.854	797.11	Unknown	[M+H]+	null	null	null	null	0.42094	0.010493	1.37733
1508	Negative	1.554	639.113	Unknown	[M-H]-	null	null	null	null	0.030716	0.010493	1.13543
1509	Positive	0.085	100.083	no MS2: 2-Piperidone; CE0; XUWHAWMETYGRKB-UHFFFAOYSA-N	[M+H]+	C5H9NO	Piperidinones	XUWHAWMETYGRKB-UHFFFAOYSA-N	C1CCN=C(C1)O	8.8448	0.010494	1.46475
1510	Positive	0.509	111.984	Unknown	[M+H]+	null	null	null	null	10.061	0.010494	1.27908
1511	Positive	0.066	298.104	no MS2: ACTIPHENOL	[M+Na]+	C15H17NO4	Alkyl-phenylketones	YTLMIHBTPWTPEV-UHFFFAOYSA-N	O=C1N=C(O)CC(C1)CC(=O)C=2C=C(C=C(C2O)C)C	3.3091	0.010494	1.49474
1512	Positive	5.954	240.198	low score: Isokobusone_major	[M+NH4]+	C14H22O2	Cyclic alcohols and derivatives	BSFUDCIRZBAPDS-UHFFFAOYSA-N	C=C1CCC2C(CC2(C)C)C(=O)CCC1O	2.1487	0.010494	1.3443
1513	Negative	1.147	983.907	Unknown	[M-H]-	null	null	null	null	0.16704	0.010494	1.10971
1514	Positive	0.819	193.942	Unknown	[M+H]+	null	null	null	null	24.025	0.010517	1.42904
1515	Positive	0.568	379.815	Unknown	[M+H]+	null	null	null	null	113.9	0.010517	1.46379
1516	Positive	0.754	106.999	Unknown	[M+H]+	null	null	null	null	54.732	0.010533	1.58549
1517	Positive	6.18	371.253	low score: NCGC00380552-01_C22H36O3_2(1H)-Naphthalenone, 8-[5-(acetyloxy)-3-methylpentyl]octahydro-4,4,8a-trimethyl-7-methylene-	[M+Na]+	C22H36O3	Diterpenoids	LZGVQJDYLAUCGI-UHFFFAOYSA-N	CC(CCOC(C)=O)CCC1C(=C)CCC2C(C)(C)CC(=O)CC12C	7.0293	0.010533	1.47015
1518	Positive	14.304	739.658	low score: (2E,6E)-3,7,11,15,19,23,27,31,35-nonamethylhexatriaconta-2,6,34-triene-1,11,15,19,23,27,31-heptol	[M+H]+	C45H86O7	Polyprenols	FPJJIWCMASJCHO-NXRGQNTBSA-N	OCC=C(C)CCC=C(C)CCCC(O)(C)CCCC(O)(C)CCCC(O)(C)CCCC(O)(C)CCCC(O)(C)CCCC(O)(C)CCC=C(C)C	444.46	0.010533	1.40259
1519	Positive	6.469	370.273	Unknown	[M+H]+	null	null	null	null	2.8299	0.010533	1.2931
1520	Positive	12.075	414.459	Unknown	[M+H]+	null	null	null	null	129.03	0.010533	1.29076
1521	Positive	0.742	396.114	low score: 2-(5,11-dioxoisoindolo[2,1-a]quinazolin-6(5H,6aH,11H)-yl)-N-(1H-pyrazol-4-yl)acetamide	[M+Na]+	C20H15N5O3	Indoloquinazolines	QYGUYHZAAVMQBV-UHFFFAOYSA-N	O=C(NC=1C=NNC1)CN2C(=O)C=3C=CC=CC3N4C(=O)C=5C=CC=CC5C42	48.383	0.010534	1.41797
1522	Positive	10.203	666.479	low score: Scopularide D	[M+H]+	C35H63N5O7	Cyclic depsipeptides	CSJVUDGCIHMRRC-UHFFFAOYSA-N	CC(CC(CCCCCC)C)C1CC(NCC(NC(C(NC(C(NC(C(NC(C(O1)=O)C(C)C)=O)C)=O)CC(C)C)=O)C(C)C)=O)=O	22.551	0.01054	1.03287
1523	Negative	1.354	553.249	no MS2: Pantethine	[M-H]-	C22H42N4O8S2	Beta amino acids and derivatives	DJWYOLJPSHDSAL-UHFFFAOYSA-N	OC(=NCCSSCCN=C(O)CCN=C(O)C(O)C(C)(C)CO)CCN=C(O)C(O)C(C)(C)CO	0.1236	0.01054	1.16932
1524	Positive	11.993	298.372	Unknown	[M+H]+	null	null	null	null	0.48355	0.010542	1.60285
1525	Positive	1.181	554.837	Unknown	[M+H]+	null	null	null	null	3.3888	0.010542	1.15766
1526	Positive	0.067	761.611	no MS2: Glyceryl trimyristate	[M+K]+	C45H86O6	Triacylglycerols	DUXYWXYOBMKGIN-UHFFFAOYSA-N	CCCCCCCCCCCCCC(=O)OCC(COC(=O)CCCCCCCCCCCCC)OC(=O)CCCCCCCCCCCCC	6.9498	0.010542	0.927462
1527	Positive	0.236	784.649	Unknown	[M+H]+	null	null	null	null	0.46392	0.010542	1.59385
1528	Negative	1.432	608.166	Unknown	[M-H]-	null	null	null	null	0.059701	0.010542	1.21256
1529	Positive	0.528	245.823	Unknown	[M+H]+	null	null	null	null	123.8	0.01055	1.59404
1530	Positive	6.156	363.191	low score: Eupalinolide K	[M+Na]+	C20H26O6	Germacranolides and derivatives	APOGLVUGPAVNAP-DRGQDVMOSA-N	O=C(OC1CC(=CCC(O)C(=CC2OC(=O)C(=C)C21)C)C)C(=CCO)C	9.333	0.01055	1.1304
1531	Positive	10.354	504.342	low score: "((4R)-4-((3R,5S,7R,9S,10S,13R,14S,17R)-3,7-dihydroxy-10,13-dimethylhexadecahydro-1H-cyclopenta[a]phenanthren-17-yl)pentanoyl)-D-phenylalanine"	[M-2H2O+H]+	C33H49NO5	Glycinated bile acids and derivatives	CEMZGPKUKMFNNF-TUBYWNESSA-N	[H][C@@]12[C@H](O)C[C@@H]3C[C@H](O)CC[C@]3(C)[C@H]1CC[C@@]4(C)[C@H]2CC[C@@H]4[C@@H](CCC(N[C@H](CC5=CC=CC=C5)C(O)=O)=O)C	10.463	0.01055	1.17958
1532	Positive	13.601	341.293	no MS2: "(R)-4-((3S,5S,8R,9S,10S,13R,14S,17R)-3-hydroxy-10,13-dimethylhexadecahydro-1H-cyclopenta[a]phenanthren-17-yl)pentanoic acid"	[M-2H2O+H]+	C24H40O3	Monohydroxy bile acids, alcohols and derivatives	SMEROWZSTRWXGI-XBESLWPFSA-N	C[C@@H]([C@H]1CC[C@]2([H])[C@]1(C)CC[C@@]3([H])[C@@]2([H])CC[C@]4([H])[C@]3(C)CC[C@H](O)C4)CCC(O)=O	3.1913	0.010563	1.33605
1533	Positive	13.508	628.42	Unknown	[M+H]+	null	null	null	null	18.407	0.010577	1.03953
1534	Positive	0.22	593.196	no MS2: Pantethine	[M+K]+	C22H42N4O8S2	Beta amino acids and derivatives	DJWYOLJPSHDSAL-UHFFFAOYSA-N	OC(=NCCSSCCN=C(O)CCN=C(O)C(O)C(C)(C)CO)CCN=C(O)C(O)C(C)(C)CO	65.825	0.010585	1.54548
1535	Positive	14.557	136.032	Benzothiazole	[M+H]+	C7H5NS	Benzothiazoles	IOJUPLGTWVMSFF-UHFFFAOYSA-N	N1=CSC=2C=CC=CC12	2.9911	0.01059	1.33971
1536	Positive	14.306	380.14	no MS2: NCGC00384901-01_C24H17N3O2_(7Z)-7-Benzylidene-6-methyl-6,7-dihydroquinazolino[3,2-a][1,4]benzodiazepine-5,13-dione	[M+H]+	C24H17N3O2	Pyrimidodiazepines	HXDZMNFJQNZXKW-QNGOZBTKSA-N	CN1C(=O)C2=C(C=CC=C2)N3C(=O)C4=C(C=CC=C4)/N=C3/C1=C/C5=CC=CC=C5	83.903	0.01059	1.33204
1537	Positive	0.578	101.95	Unknown	[M+H]+	null	null	null	null	9.1731	0.010592	1.23723
1538	Positive	11.069	114.1	low score: Unknown (carbon number 6); PlaSMA ID-45	[M+H]+	C6H11NO	Unknown	null	null	6.6631	0.010592	1.71619
1539	Positive	12.536	430.425	Unknown	[M+H]+	null	null	null	null	0.49025	0.010592	1.62662
1540	Positive	12.93	346.307	low score: Macamide B	[M+H]+	C23H39NO	N-acyl amines	MLGPKWUKOQAAGI-UHFFFAOYSA-N	O=C(NCC=1C=CC=CC1)CCCCCCCCCCCCCCC	0.47042	0.010592	1.56095
1541	Positive	0.734	241.903	Unknown	[M+H]+	null	null	null	null	69.963	0.010592	1.55562
1542	Positive	7.129	563.474	Unknown	[M+H]+	null	null	null	null	100.86	0.010592	1.46754
1543	Positive	14.403	445.153	no MS2: Piptocarphin A	[M+Na]+	C21H26O9	Tricarboxylic acids and derivatives	BZQDHZDSIXPDSS-CYDVCVIESA-N	O=C1C(COC(C)=O)=C2[C@@H](OC(C(C)=C)=O)C[C@@](C)(O)[C@@](O)(O3)CC[C@]3(C)/C=C2/O1	6.7925	0.010592	1.25131
1544	Positive	1.158	548.941	Unknown	[M+H]+	null	null	null	null	4.7394	0.010592	1.21116
1545	Positive	14.331	522.63	Unknown	[M+H]+	null	null	null	null	10.212	0.010592	1.15369
1546	Positive	6.241	786.346	low score: Rifaximin	[M+H]+	C43H51N3O11	Macrolactams	NZCRJKRKKOLAOJ-XRCRFVBUSA-N	C[C@H]1/C=C/C=C(\C(=O)NC2=C(C3=C(C4=C(C(=C3O)C)O[C@@](C4=O)(O/C=C/[C@@H]([C@H]([C@H]([C@@H]([C@@H]([C@@H]([C@H]1O)C)O)C)OC(=O)C)C)OC)C)C5=C2N6C=CC(=CC6=N5)C)O)/C	76.069	0.010592	1.04568
1547	Positive	1.166	122.104	no MS2: 2,6-Xylidine	[M+H]+	C8H11N	m-Xylenes	UFFBMTHBGFGIHF-UHFFFAOYSA-N	CC1=CC=CC(C)=C1N	3.4004	0.010599	0.924709
1548	Positive	13.934	341.329	low score: docosanoic acid	[M+H]+	C22H44O2	Very long-chain fatty acids	UKMSUNONTOPOIO-UHFFFAOYSA-N	O=C(O)CCCCCCCCCCCCCCCCCCCCC	319.54	0.010599	1.36757
1549	Positive	1.702	172.968	Unknown	[M+H]+	null	null	null	null	59.766	0.010618	1.47954
1550	Positive	15.27	633.192	low score: (S)-7-(((2S,3R,4S,5S,6R)-4,5-dihydroxy-6-(hydroxymethyl)-3-(((2S,3R,4R,5R,6S)-3,4,5-trihydroxy-6-methyltetrahydro-2H-pyran-2-yl)oxy)tetrahydro-2H-pyran-2-yl)oxy)-5-hydroxy-2-(3-hydroxy-5-methoxyphenyl)chroman-4-one	[M+Na]+	C28H34O15	Flavonoid-7-O-glycosides	TWAZWVPPDIUVOD-UZRWAPQLSA-N	O=C1C2=C(O)C=C(OC3OC(CO)C(O)C(O)C3OC4OC(C)C(O)C(O)C4O)C=C2OC(C=5C=C(O)C=C(OC)C5)C1	126.62	0.010618	1.1246
1551	Positive	1.028	474.972	Unknown	[M+H]+	null	null	null	null	16.387	0.01062	1.44975
1552	Positive	1.109	794.163	Unknown	[M+H]+	null	null	null	null	0.020544	0.01062	1.17742
1553	Positive	6.228	289.148	low score: PHA-00568487	[M+H]+	C16H20N2O3	Benzo-1,4-dioxanes	LUVXHMJTVXZFPD-ZDUSSCGKSA-N	O=C(N[C@H]1CN2CCC1CC2)C1=CC2=C(OCCO2)C=C1	10.946	0.010628	1.1762
1554	Positive	8.969	508.386	Unknown	[M+H]+	null	null	null	null	0.48782	0.010636	1.45946
1555	Positive	6.374	400.283	low score: Nakijiquinone O	[M+H]+	C25H37NO3	Prenylquinones	FNCUIBSVSDQFCR-UHFFFAOYSA-N	CC(CNC(C(C(CC1(C)C(C)CCC2(C)C(C)=CCCC21)=C3O)=O)=CC3=O)C	6.7825	0.010654	1.4513
1556	Positive	3.925	205.085	low score: Levamisole	[M+H]+	C11H12N2S	Imidazothiazoles	HLFSDGLLUJUHTE-SNVBAGLBSA-N	c(c3)ccc(c3)C(C1)N=C(S2)N(CC2)1	2.1788	0.010699	1.33857
1557	Positive	14.308	283.247	no MS2: 2-(N-butylacetamido)-N-cyclohexylbutanamide	[M+H]+	C16H30N2O2	Tertiary carboxylic acid amides	PTXYUQCTWNHEEB-UHFFFAOYSA-N	CCCCN(C(C)=O)C(CC)C(=O)NC1CCCCC1	6.3946	0.010733	1.528
1558	Positive	13.475	516.468	Unknown	[M+H]+	null	null	null	null	0.48322	0.010733	1.41596
1559	Positive	1.277	331.025	no MS2: DEOXYURIDINE-MONOPHOSPHATE	[M+Na]+	C9H13N2O8P	Pyrimidine 2'-deoxyribonucleoside monophosphates	JSRLJPSBLDHEIO-UHFFFAOYSA-N	C1C(C(OC1N2C=CC(=O)NC2=O)COP(=O)(O)O)O	6.8128	0.010733	1.14505
1560	Positive	12.99	496.456	Unknown	[M+H]+	null	null	null	null	2.3819	0.010733	1.18043
1561	Positive	0.244	371.126	no MS2: 1-[2-hydroxy-4-(3-hydroxy-5-methylphenoxy)-6-methylphenyl]-3-methylbutane-2,3-diol	[M+K]+	C19H24O5	Diphenylethers	FLLRZSQAKUHACV-UHFFFAOYSA-N	OC=1C=C(OC2=CC(O)=C(C(=C2)C)CC(O)C(O)(C)C)C=C(C1)C	44.053	0.010739	1.44888
1562	Positive	16.479	521.174	low score: 1-[4,5-dihydroxy-6-(hydroxymethyl)-3-[(E)-3-(4-hydroxyphenyl)prop-2-enoyl]oxyoxan-2-yl]oxy-6-hydroxy-7-methylidene-4a,5,6,7a-tetrahydro-1H-cyclopenta[c]pyran-4-carboxylic acid	[M+H]+	C25H28O12	Coumaric acid esters	QPNFBUARICHXGG-QPJJXVBHSA-N	O=C(O)C1=COC(OC2OC(CO)C(O)C(O)C2OC(=O)C=CC3=CC=C(O)C=C3)C4C(=C)C(O)CC14	42.923	0.010739	1.25139
1563	Positive	12.216	438.416	Unknown	[M+H]+	null	null	null	null	3.2311	0.010747	1.34184
1564	Positive	13.601	823.567	Unknown	[M+H]+	null	null	null	null	7.3794	0.010793	0.852345
1565	Positive	1.057	648.931	Unknown	[M+H]+	null	null	null	null	3.4499	0.010795	1.1184
1566	Positive	16.526	445.151	low score: Tetracycline	[M+H]+	C22H24N2O8	Tetracyclines	JYHCQVWYCGHXGP-UHFFFAOYSA-N	CC1(C2CC3C(C(=O)C(=C(N)O)C(=O)C3(C(=O)C2=C(C4=C1C=CC=C4O)O)O)N(C)C)O	11.295	0.010816	1.24319
1567	Positive	1.149	324.873	Unknown	[M+H]+	null	null	null	null	3.2295	0.010833	0.874631
1568	Positive	9.183	596.399	Unknown	[M+H]+	null	null	null	null	59.806	0.010833	1.14374
1569	Positive	9.246	247.186	low score: Sophocarpine	[M+H]+	C15H22N2O	Matrine alkaloids	AAGFPTSOPGCENQ-JLNYLFASSA-N	C1C[C@H]2CN3[C@H](CC=CC3=O)[C@@H]4[C@H]2N(C1)CCC4	38.235	0.01084	1.42839
1570	Positive	8.767	534.331	Unknown	[M+K]+	null	null	null	null	7.7138	0.01084	0.983843
1571	Positive	10.037	536.408	low score: NCGC00347555-02!2-(21-amino-3,20-dihydroxydocosan-2-yl)oxy-6-(hydroxymethyl)oxane-3,4,5-triol [IIN-based: Match]	[M+H]+	C28H57NO8	Fatty acyl glycosides of mono- and disaccharides	FZSYYVOKNJZJTF-UHFFFAOYSA-N	CC(N)C(O)CCCCCCCCCCCCCCCCC(O)C(C)OC1OC(CO)C(O)C(O)C1O	3.5095	0.010845	1.20909
1572	Positive	19.88	464.414	Unknown	[M+H]+	null	null	null	null	0.48336	0.010845	1.68384
1573	Positive	7.567	264.255	Unknown	[M+H]+	null	null	null	null	0.49943	0.010845	1.51783
1574	Positive	0.054	275.279	Unknown	[M+H]+	null	null	null	null	4.8114	0.010845	1.50325
1575	Positive	12.181	482.442	Unknown	[M+H]+	null	null	null	null	3.992	0.010845	1.16883
1576	Positive	7.922	207.047	low score: 5-(1,2-dithiolan-3-yl)pentanoic acid	[M+H]+	C8H14O2S2	Lipoic acids and derivatives	AGBQKNBQESQNJD-UHFFFAOYSA-N	O=C(O)CCCCC1SSCC1	3.8453	0.010847	1.29426
1577	Positive	10.247	100.083	no MS2: 2-Piperidone; CE0; XUWHAWMETYGRKB-UHFFFAOYSA-N	[M+H]+	C5H9NO	Piperidinones	XUWHAWMETYGRKB-UHFFFAOYSA-N	C1CCN=C(C1)O	13.73	0.010887	1.57445
1578	Positive	0.044	115.103	Unknown	[M+H]+	null	null	null	null	7.9995	0.0109	1.48862
1579	Negative	1.124	626.271	Unknown	[M-H]-	null	null	null	null	0.025993	0.010908	1.16675
1580	Positive	1.741	235.222	low score: (1R,2R,5R,7S)-2-cyclopentyl-5,7-dimethyl-1,3-diazaadamantane	[M+H]+	C15H26N2	Diazinanes	ZKHXDVJFFSPXFK-QKDCVEJESA-N	N12CC3(C)CN(CC(C)(C1)C3)C2C4CCCC4	5.6887	0.010913	1.59945
1581	Positive	13.491	257.267	Unknown	[M+H]+	null	null	null	null	9.0984	0.010913	1.46151
1582	Positive	13.478	298.297	low score: Tridemorph	[M+H]+	C19H39NO	Morpholines	YTOPFCCWCSOHFV-UHFFFAOYSA-N	CCCCCCCCCCCCCN(C1)CC(C)OC(C)1	0.45911	0.010916	1.54667
1583	Positive	0.792	108.922	Unknown	[M+H]+	null	null	null	null	128.02	0.01092	1.42752
1584	Positive	11.97	507.317	low score: (2E,6E,11E,13E)-18-(2,6-dioxopiperidin-4-yl)-9-hydroxy-8-methoxy-10,12,14-trimethyl-15-oxooctadeca-2,6,11,13-tetraenoic acid	[M+NH4]+	C27H39NO7	Lineolic acids and derivatives	SLGMSTJSVRGVPB-BESLVFPPSA-N	O=C(O)C=CCCC=CC(OC)C(O)C(C=C(C=C(C(=O)CCCC1CC(=O)N=C(O)C1)C)C)C	0.43954	0.01092	1.39469
1585	Positive	12.664	327.278	Unknown	[M+H]+	null	null	null	null	2.2743	0.010921	0.927233
1586	Positive	10.893	678.481	Unknown	[M+H]+	null	null	null	null	13.207	0.01093	1.12039
1587	Positive	18.171	984.33	Unknown	[M+H]+	null	null	null	null	6.5548	0.010941	0.840852
1588	Negative	9.963	432.203	low score: Guan-fu base Y	[M+HCOO]-	C22H29NO5	Atisane diterpenoids	XGTNTUKODZZCGL-UHFFFAOYNA-N	CC(=O)OC1CC2(C)CN3C4CC56CC(=C)C7C(O)C5C(C1)(C24)C3C6(O)C7O	0.4972	0.010941	1.23906
1589	Negative	1.276	545.25	low score: Confluentic acid	[M+HCOO]-	C28H36O8	Depsides and depsidones	UANVCGQMNRTKGM-UHFFFAOYSA-N	CCCCCc1cc(cc(c1C(=O)O)OC)OC(=O)c1c(cc(cc1CC(=O)CCCCC)OC)O	0.05108	0.010949	1.02247
1590	Positive	10.494	618.313	low score: NCGC00385653-01_C36H40O8_	[M+NH4]+	C36H40O8	Jatrophane and cyclojatrophane diterpenoids	IBMKFRJIFFORNR-LAZXBOAMSA-N	CC1CC2(OC(C)=O)C(\C=C(C)/C(CC(=O)C(C)(C)/C=C/C(C)C2=O)OC(=O)C3=CC=CC=C3)C1OC(=O)C4=CC=CC=C4	246.54	0.010967	1.41524
1591	Positive	8.545	531.367	low score: 4,4,10,13,14-pentamethyl-17-(1,5,6-trihydroxy-6-methylheptan-2-yl)-2,3,5,6,7,11,12,15,16,17-decahydro-1H-cyclopenta[a]phenanthrene-2,3,12-triol_major	[M+Na]+	C30H52O6	Triterpenoids	YRXIDKUVBPMNRA-UHFFFAOYSA-N	CC(C)(O)C(O)CCC(CO)C1CCC2(C)C3=C(CC(O)C12C)C1(C)CC(O)C(O)C(C)(C)C1CC3	5.9934	0.010967	1.10775
1592	Negative	1.276	510.226	Unknown	[M-H]-	null	null	null	null	0.028046	0.010968	1.12408
1593	Positive	7.446	100.084	no MS2: 2-Piperidone; CE0; XUWHAWMETYGRKB-UHFFFAOYSA-N	[M+H]+	C5H9NO	Piperidinones	XUWHAWMETYGRKB-UHFFFAOYSA-N	C1CCN=C(C1)O	11.421	0.010996	1.5742
1594	Positive	9.17	100.084	N-Methyl-2-pyrrolidone	[M+H]+	C5H9NO	N-alkylpyrrolidines	SECXISVLQFMRJM-UHFFFAOYSA-N	CN1CCCC1=O	12.062	0.010996	1.53064
1595	Positive	13.366	124.096	no MS2: HISTIDINOL	[M-H2O+H]+	C6H11N3O	Aralkylamines	ZQISRDCJNBUVMM-YFKPBYRVSA-N	N[C@H](CO)CC1=CN=CN1	7.0393	0.010996	1.49581
1596	Positive	6.527	338.241	Unknown	[M+H]+	null	null	null	null	2.2015	0.010996	1.21335
1597	Positive	10.854	506.4	Unknown	[M+H]+	null	null	null	null	0.49338	0.010996	1.53808
1598	Positive	0.122	520.178	no MS2: NCGC00380203-01_C26H30ClNO8_2-{7-Acetoxy-5-chloro-3-[(1E,3E)-3,5-dimethyl-1,3-heptadien-1-yl]-7-methyl-6,8-dioxo-7,8-dihydro-2(6H)-isoquinolinyl}pentanedioic acid	[M+H]+	C26H30ClNO8	Glutamic acid and derivatives	BVIXPBFQDINHQZ-XHBXSBNISA-N	CCC(C)\C=C(C)\C=C\C1=C\C/2=C(Cl)/C(=O)C(C)(OC(C)=O)C(=O)C2=C\N1C(CCC(O)=O)C(O)=O	33.534	0.010996	1.48242
1599	Positive	14.285	369.375	low score: tetracosanoic acid	[M+H]+	C24H48O2	Very long-chain fatty acids	QZZGJDVWLFXDLK-UHFFFAOYSA-N	O=C(O)CCCCCCCCCCCCCCCCCCCCCCC	9.7301	0.010996	1.27733
1600	Positive	1.142	560.3	low score: NCGC00380158-01!2-[2-[2-[[2-[2-(2-hydroxypropanoylamino)-3-methylbutanoyl]oxy-3-methylbutanoyl]amino]-3-methylbutanoyl]oxypropanoylamino]-3-methylbutanoic acid [IIN-based: Match]	[M+H]+	C26H45N3O10	Depsipeptides	YBUWNKPGCLTWJO-UHFFFAOYSA-N	CC(C)C(NC(=O)C(C)OC(=O)C(NC(=O)C(OC(=O)C(NC(=O)C(C)O)C(C)C)C(C)C)C(C)C)C(O)=O	0.0057675	0.010996	1.21321
1601	Positive	16.618	447.148	no MS2: NCGC00381133-01_C17H28O12_	[M+Na]+	C17H28O12	Saccharolipids	ZMIQCOSRPMWYLS-ZZXKWVIFSA-N	C/C=C(C)/C(=O)OCC1OC(OC2OC(CO)C(O)C(O)C2O)C(O)C(O)C1O	9.7853	0.010996	1.17845
1602	Positive	6.66	561.407	low score: Diacetylpyxinol	[M+H]+	C34H56O6	Triterpene saponins	TWRWTOXPYGQKPW-ZWXXETMRSA-N	CC1(C(C2(CCC1OC(C)=O)C)CCC3(C2CC(O)C4[C@]3(CCC4[C@]5(C)O[C@@H](C(C)(OC(C)=O)C)CC5)C)C)C	0.057396	0.010996	1.14215
1603	Positive	9.286	100.083	N-Methyl-2-pyrrolidone	[M+H]+	C5H9NO	N-alkylpyrrolidines	SECXISVLQFMRJM-UHFFFAOYSA-N	CN1CCCC1=O	15.047	0.011001	1.48574
1604	Positive	6.406	230.156	Unknown	[M+H]+	null	null	null	null	4.1581	0.01101	1.57173
1605	Positive	1.748	193.945	Unknown	[M+H]+	null	null	null	null	26.174	0.011018	1.45037
1606	Positive	1.116	506.843	Unknown	[M+H]+	null	null	null	null	3.8661	0.011022	1.19349
1607	Positive	0.652	422.853	Unknown	[M+H]+	null	null	null	null	7.6154	0.011028	1.4504
1608	Positive	17.973	519.174	no MS2: [(2S,3S,4R,5R)-4-hydroxy-2,5-bis(hydroxymethyl)-2-[(2R,3R,4S,5S,6R)-3,4,5-trihydroxy-6-(hydroxymethyl)oxan-2-yl]oxyoxolan-3-yl] (E)-3-(4-hydroxy-3-methoxyphenyl)prop-2-enoate	[M+H]+	C22H30O14	Coumaric acids and derivatives	ZPEADZHVGOCGKH-YQTDNFGYSA-N	O=C(OC1C(O)C(OC1(OC2OC(CO)C(O)C(O)C2O)CO)CO)C=CC3=CC=C(O)C(OC)=C3	144.93	0.01104	1.24733
1609	Positive	13.497	297.261	no MS2: 2-(N-butylpropionamido)-N-cyclohexylbutanamide	[M+H]+	C17H32N2O2	Tertiary carboxylic acid amides	QMXGNDITXNMQEK-UHFFFAOYSA-N	CCCCN(C(=O)CC)C(CC)C(=O)NC1CCCCC1	17.149	0.011065	1.54049
1610	Positive	1.041	338.987	Unknown	[M+H]+	null	null	null	null	3.9907	0.011073	1.07091
1611	Positive	12.572	353.268	C21H36O4; PlaSMA ID-1954	[M+H]+	C21H36O4	Formula predicted	null	null	2.9106	0.01108	1.02059
1612	Positive	14.542	369.233	low score: 5-(3-methoxyphenyl)-N-((octahydro-1H-quinolizin-1-yl)methyl)-1H-pyrazole-3-carboxamide	[M+H]+	C21H28N4O2	Phenylpyrazoles	ZZFSKJIAKIBPSR-UHFFFAOYSA-N	O=C(NCC1CCCN2CCCCC21)C3=NNC(=C3)C=4C=CC=C(OC)C4	0.46497	0.011084	1.41523
1613	Positive	6.128	372.286	low score: Docosahexaenoyl Ethanolamide	[M+H]+	C24H37NO2	N-acylethanolamines	GEEHOLRSGZPBSM-KUBAVDMBSA-N	CC/C=C\C/C=C\C/C=C\C/C=C\C/C=C\C/C=C\CCC(=O)NCCO	14.2	0.011106	1.49302
1614	Positive	1.807	131.939	Unknown	[M+H]+	null	null	null	null	279.83	0.011118	1.51368
1615	Positive	6.524	428.315	low score: Peimisine	[M+H]+	C27H41NO3	Jerveratrum-type alkaloids	KYELXPJVGNZIGC-GKFGJCLESA-N	O=C1CC2C3C(=C(C)C4(OC5CC(C)CNC5C4C)CC3)CC2C6(C)CCC(O)CC16	4.433	0.011124	1.27533
1616	Positive	15.471	522.635	Unknown	[M+H]+	null	null	null	null	11.864	0.011126	1.20049
1617	Positive	6.292	490.323	low score: Oxysporidinone_130003	[M+H]+	C28H43NO6	Terpene glycosides	CYNJYGDSSURTLH-CPNJWEJPSA-N	O=C1CC(O)C(C2=CN(C)C(C(C3OC(/C(C)=C/C(C)CC(C)CC)C(C)CC3)=C2O)=O)(O)CC1	2.4997	0.011135	1.215
1618	Positive	1.143	230.156	Unknown	[M+H]+	null	null	null	null	8.6592	0.011136	1.17964
1619	Positive	0.17	445.151	no MS2: Piptocarphin A	[M+Na]+	C21H26O9	Tricarboxylic acids and derivatives	BZQDHZDSIXPDSS-CYDVCVIESA-N	O=C1C(COC(C)=O)=C2[C@@H](OC(C(C)=C)=O)C[C@@](C)(O)[C@@](O)(O3)CC[C@]3(C)/C=C2/O1	5.7381	0.01114	1.24697
1620	Positive	1.157	558.288	no MS2: Ergocryptine	[M+H-H2O]+	C32H41N5O5	Lysergamides	YDOTUXAWKBPQJW-NSLWYYNWSA-N	O=C1N2CCCC2C3(O)OC(N=C(O)C4C=C5C=6C=CC=C7NC=C(C76)CC5N(C)C4)(C(=O)N3C1CC(C)C)C(C)C	0.012185	0.01114	1.22599
1621	Positive	9.012	801.006	Unknown	[M+H]+	null	null	null	null	9.6358	0.01114	1.38719
1622	Positive	1.113	564.805	Unknown	[M+H]+	null	null	null	null	5.38	0.011143	1.11139
1623	Positive	8.129	503.357	low score: Glutamine chenodeoxycholic acid	[M-H2O+H]+	C29H48N2O6	Glycinated bile acids and derivatives	WKNSSWRPDRZCAQ-VVJLALRJSA-N	C[C@H](CCC(N[C@@H](CCC(N)=O)C(O)=O)=O)[C@H]1CC[C@@]2([H])[C@]3([H])[C@H](O)C[C@]4([H])C[C@H](O)CC[C@]4(C)[C@H]3CC[C@@]21C	0.46953	0.01116	1.5276
1624	Positive	0.691	223.08	no MS2: 2-methylanthra-9,10-quinone	[M+H]+	C15H10O2	Anthraquinones	NJWGQARXZDRHCD-UHFFFAOYSA-N	O=C1C=2C=CC=CC2C(=O)C3=CC(=CC=C13)C	3.5433	0.011173	1.5661
1625	Positive	1.036	232.955	Unknown	[M+H]+	null	null	null	null	0.49292	0.011182	1.45778
1626	Positive	14.253	453.362	no MS2: "(3R,5R,7R,8S,9S,10S,12S,13R,14S,17R)-17-((R)-7-hydroxy-6-(hydroxymethyl)heptan-2-yl)-10,13-dimethylhexadecahydro-1H-cyclopenta[a]phenanthrene-3,7,12-triol"	[M+H]+	C27H48O5	Tetrahydroxy bile acids, alcohols and derivatives	JNMALBXXJSWZQY-JOICSPLZSA-N	C[C@@H]([C@H]1CC[C@]2([H])[C@]1(C)[C@@H](O)C[C@@]3([H])[C@]2([H])[C@H](O)C[C@]4([H])[C@]3(C)CC[C@@H](O)C4)CCCC(CO)CO	0.40964	0.011182	1.20598
1627	Positive	16.502	223.079	no MS2: 2-methylanthra-9,10-quinone	[M+H]+	C15H10O2	Anthraquinones	NJWGQARXZDRHCD-UHFFFAOYSA-N	O=C1C=2C=CC=CC2C(=O)C3=CC(=CC=C13)C	9.8187	0.011183	1.47243
1628	Positive	0.71	148.943	Unknown	[M+H]+	null	null	null	null	173.33	0.011206	1.50247
1629	Negative	1.196	464.281	Unknown	[M-H]-	null	null	null	null	0.027092	0.011206	1.36055
1630	Positive	13.861	336.315	Unknown	[M+H]+	null	null	null	null	0.46316	0.011225	1.32759
1631	Positive	8.871	100.083	N-Methyl-2-pyrrolidone	[M+H]+	C5H9NO	N-alkylpyrrolidines	SECXISVLQFMRJM-UHFFFAOYSA-N	CN1CCCC1=O	12.354	0.011258	1.52528
1632	Positive	0.681	130.016	Unknown	[M+H]+	null	null	null	null	52.134	0.011258	1.462
1633	Positive	13.247	464.412	Unknown	[M+H]+	null	null	null	null	0.49394	0.011258	1.61426
1634	Positive	0.389	203.242	Unknown	[M+H]+	null	null	null	null	0.45414	0.011258	1.41291
1635	Positive	9.433	247.185	low score: Sophocarpine	[M+H]+	C15H22N2O	Matrine alkaloids	AAGFPTSOPGCENQ-JLNYLFASSA-N	C1C[C@H]2CN3[C@H](CC=CC3=O)[C@@H]4[C@H]2N(C1)CCC4	31.096	0.011258	1.48641
1636	Positive	17.165	550.668	Unknown	[M+H]+	null	null	null	null	2.292	0.011258	1.331
1637	Positive	10.486	371.131	low score: Ajugol	[M+Na]+	C15H24O9	Iridoid O-glycosides	VELYAQRXBJLJAK-XKKWFBPMSA-N	OCC1OC(OC2OC=CC3C(O)CC(O)(C)C23)C(O)C(O)C1O	10.661	0.011271	1.35304
1638	Positive	0.47	286.855	Unknown	[M+H]+	null	null	null	null	253.79	0.011293	1.51177
1639	Positive	15.518	359.349	Unknown	[M+H]+	null	null	null	null	0.45183	0.011294	1.40639
1640	Positive	1.189	549.372	Unknown	[M+H]+	null	null	null	null	0.02969	0.011294	1.03933
1641	Positive	1.137	339.981	Unknown	[M+H]+	null	null	null	null	2.8239	0.011299	0.885591
1642	Negative	16.21	666.02	Unknown	[M-H]-	null	null	null	null	2.3993	0.011341	1.34166
1643	Positive	13.588	464.413	Unknown	[M+H]+	null	null	null	null	0.49251	0.011352	1.4886
1644	Positive	9.252	610.416	low score: Emericellamide A	[M+H]+	C31H55N5O7	Cyclic depsipeptides	QURRTAYEASAREY-OOVPVTRWSA-N	CCCCCC[C@H](C)[C@H]1OC(=O)[C@H](C)NC(=O)[C@H](C)NC(=O)[C@H](CC(C)C)NC(=O)[C@@H](NC(=O)CNC(=O)[C@@H]1C)C(C)C	32.323	0.011352	1.128
1645	Positive	13.784	171.11	no MS2: Levetiracetam	[M+H]+	C8H14N2O2	Alpha amino acids and derivatives	HPHUVLMMVZITSG-LURJTMIESA-N	O=C1N(CCC1)C(C(=N)O)CC	39.44	0.011362	1.42644
1646	Positive	12.582	283.245	low score: 2-(N-butylacetamido)-N-cyclohexylbutanamide	[M+H]+	C16H30N2O2	Tertiary carboxylic acid amides	PTXYUQCTWNHEEB-UHFFFAOYSA-N	CCCCN(C(C)=O)C(CC)C(=O)NC1CCCCC1	4.2836	0.011362	1.48065
1647	Positive	6.446	331.196	low score: Carnosol	[M+H]+	C20H26O4	Diterpene lactones	XUSYGBPHQBWGAD-PJSUUKDQSA-N	O=C1OC2C3=CC(=C(O)C(O)=C3C14CCCC(C)(C)C4C2)C(C)C	11.331	0.011362	1.16447
1648	Positive	0.509	114.946	Unknown	[M+H]+	null	null	null	null	15.233	0.011363	1.40887
1649	Positive	14.921	100.083	no MS2: 2-Piperidone; CE0; XUWHAWMETYGRKB-UHFFFAOYSA-N	[M+H]+	C5H9NO	Piperidinones	XUWHAWMETYGRKB-UHFFFAOYSA-N	C1CCN=C(C1)O	15.268	0.011376	1.49976
1650	Positive	14.963	429.442	Unknown	[M+H]+	null	null	null	null	0.48985	0.011376	1.48426
1651	Positive	6.225	460.344	Unknown	[M+H]+	null	null	null	null	11.029	0.011376	1.39031
1652	Positive	11.794	340.414	Unknown	[M+H]+	null	null	null	null	6.1872	0.011376	1.04052
1653	Positive	8.852	750.505	low score: Muronic acid	[2M+NH4]+	C21H34O5	Gamma butyrolactones	SKQHRBRVCRUFSX-MRTLOADZSA-N	CC(=O)CCCCCCCCCCCCC[C@@H]1C(C(=O)O)C(=C)C(=O)O1	8.9833	0.011376	1.26068
1654	Positive	9.622	100.083	N-Methyl-2-pyrrolidone	[M+H]+	C5H9NO	N-alkylpyrrolidines	SECXISVLQFMRJM-UHFFFAOYSA-N	CN1CCCC1=O	13.216	0.011382	1.5264
1655	Negative	8.167	516.262	Unknown	[M-H]-	null	null	null	null	0.25031	0.011382	1.09254
1656	Positive	0.513	293.874	Unknown	[M+H]+	null	null	null	null	120.76	0.011404	1.52655
1657	Positive	10.057	570.403	low score: "(4R)-4-((3R,5S,7R,9S,10S,13R,14S,17R)-3,7-dihydroxy-10,13-dimethylhexadecahydro-1H-cyclopenta[a]phenanthren-17-yl)-N-methyl-N-((2S,3R,4R,5R)-2,3,4,5,6-pentahydroxyhexyl)pentanamide"	[M+H]+	C31H55NO8	Dihydroxy bile acids, alcohols and derivatives	KUXSAFRZQPYINU-SGWAQUIASA-N	C[C@H](CCC(N(C)C[C@H](O)[C@@H](O)[C@@H]([C@@H](CO)O)O)=O)[C@H]1CC[C@H]2[C@]3([H])[C@H](O)C[C@@H]4C[C@H](O)CC[C@]4(C)[C@H]3CC[C@@]21C	0.49718	0.011408	1.27185
1658	Positive	0.427	141.01	low score: CYCLOSERINE	[M+K]+	C3H6N2O2	Alpha amino acids and derivatives	DYDCUQKUCUHJBH-UWTATZPHSA-N	OC1=NOCC1N	17.342	0.011411	1.39129
1659	Positive	1.087	572.841	Unknown	[M+H]+	null	null	null	null	7.1846	0.011411	1.17797
1660	Positive	1.306	188.071	low score: 4-hydroxy-4-(pyridin-2-yl)butan-2-one	[M+Na]+	C9H11NO2	Pyridines and derivatives	NYKHQRHPWDLZTL-UHFFFAOYSA-N	O=C(C)CC(O)C1=NC=CC=C1	11.255	0.011411	1.17463
1661	Positive	14.097	273.186	no MS2: h_92_oxabolone	[M-H2O+H]+	C18H26O3	Estrogens and derivatives	GXHBCWCMYVTJOW-DNBWYCQVSA-N	O[C@H]1CCC2C3CCC4=C(O)C(CCC4C3CC[C@@]21C)=O	7.9153	0.011411	1.29164
1662	Positive	0.551	100.083	N-Methyl-2-pyrrolidone	[M+H]+	C5H9NO	N-alkylpyrrolidines	SECXISVLQFMRJM-UHFFFAOYSA-N	CN1CCCC1=O	7.3814	0.011412	1.4707
1663	Positive	8.309	402.267	low score: 5-[(Z)-12-(3,5-dihydroxyphenyl)dodec-8-enyl]benzene-1,3-diol	[M+NH4]+	C24H32O4	Resorcinols	JDIDEXHTJXTVES-HYXAFXHYSA-N	OC=1C=C(O)C=C(C1)CCCC=CCCCCCCCC=2C=C(O)C=C(O)C2	3.8753	0.011412	0.766472
1664	Positive	10.617	100.083	N-Methyl-2-pyrrolidone	[M+H]+	C5H9NO	N-alkylpyrrolidines	SECXISVLQFMRJM-UHFFFAOYSA-N	CN1CCCC1=O	13.875	0.011433	1.51278
1665	Positive	14.113	124.096	no MS2: HISTIDINOL	[M-H2O+H]+	C6H11N3O	Aralkylamines	ZQISRDCJNBUVMM-YFKPBYRVSA-N	N[C@H](CO)CC1=CN=CN1	6.4428	0.011433	1.60153
1666	Positive	10.956	124.096	low score: HISTIDINOL	[M-H2O+H]+	C6H11N3O	Aralkylamines	ZQISRDCJNBUVMM-YFKPBYRVSA-N	N[C@H](CO)CC1=CN=CN1	2.9973	0.011433	1.50841
1667	Positive	0.776	158.975	Unknown	[M+H]+	null	null	null	null	187.23	0.011433	1.15657
1668	Positive	14.302	249.275	Unknown	[M+H]+	null	null	null	null	108.78	0.011433	1.29881
1669	Positive	6.352	333.212	low score: 14-deoxy-11,12-dihydroandrographolide	[M+H]+	C20H28O4	Diterpene lactones	GQPOXOPEDHRPQT-CRBRZBHVSA-N	O=C1OCC(C=CC2C(=C)CCC3C(C)(CO)C(O)CCC23C)=C1	8.5606	0.011433	1.25727
1670	Positive	14.318	521.156	no MS2: Mometasone furoate	[M+H]+	C27H30Cl2O6	Gluco/mineralocorticoids, progestogins and derivatives	WOFMFGQZHJDGCX-RRDYVFDESA-N	C1C(C=C2[C@](C=1)([C@]3([C@@](CC2)([C@]4([C@](C[C@H]3O)([C@@]([C@@H](C4)C)(C(CCl)=O)OC(=O)C5=CC=CO5)C)[H])[H])Cl)C)=O	8.9062	0.011433	1.03209
1671	Positive	13.019	398.268	low score: Phytosphingosine-1-P	[M+H]+	C18H40NO6P	Phosphosphingolipids	AYGOSKULTISFCW-KZNAEPCWSA-N	CCCCCCCCCCCCCC[C@H]([C@@H]([C@@H](COP(=O)(O)O)N)O)O	0.49401	0.011443	1.57554
1672	Positive	6.355	223.079	no MS2: 2-methylanthra-9,10-quinone	[M+H]+	C15H10O2	Anthraquinones	NJWGQARXZDRHCD-UHFFFAOYSA-N	O=C1C=2C=CC=CC2C(=O)C3=CC(=CC=C13)C	3.6594	0.011443	1.47909
1673	Positive	1.081	416.832	Unknown	[M+H]+	null	null	null	null	4.8518	0.011443	1.17834
1674	Positive	1.035	494.85	Unknown	[M+H]+	null	null	null	null	8.7928	0.011443	1.17492
1675	Positive	1.186	516.343	Unknown	[M+H]+	null	null	null	null	0.015434	0.011443	1.15156
1676	Positive	0.425	105.962	Unknown	[M+H]+	null	null	null	null	48.769	0.011445	1.3847
1677	Positive	10.859	524.418	Unknown	[M+H]+	null	null	null	null	0.49025	0.011445	1.64319
1678	Positive	0.476	243.846	Unknown	[M+H]+	null	null	null	null	108.3	0.011446	1.33193
1679	Positive	7.403	242.298	Unknown	[M+H]+	null	null	null	null	3.8087	0.011447	1.00173
1680	Positive	6.222	415.285	low score: Deoxycholic acid	[M+Na]+	C24H40O4	Dihydroxy bile acids, alcohols and derivatives	KXGVEGMKQFWNSR-LLQZFEROSA-N	O=C(O)CCC(C)C1CCC2C3CCC4CC(O)CCC4(C)C3CC(O)C12C	9.0017	0.011449	1.52036
1681	Positive	6.374	414.301	low score: glycoursodeoxycholic acid	[M-2H2O+H]+	C26H43NO5	Glycinated bile acids and derivatives	GHCZAUBVMUEKKP-WTFVBUONSA-N	C[C@H](CCC(=O)NCC(=O)O)[C@H]1CC[C@@H]2[C@@]1(CC[C@H]3[C@H]2[C@H](C[C@H]4[C@@]3(CC[C@H](C4)O)C)O)C	4.2907	0.011449	1.386
1682	Positive	6.075	305.179	Zeranol	[M-H2O+H]+	C18H26O5	Macrolides and analogues	DWTTZBARDOXEAM-GXTWGEPZSA-N	C[C@H]1CCC[C@@H](CCCCCC2=CC(=CC(=C2C(=O)O1)O)O)O	20.433	0.011455	1.31583
1683	Positive	14.51	628.417	Unknown	[M+H]+	null	null	null	null	15.021	0.011462	0.924079
1684	Positive	19.568	371.129	no MS2: Ajugol	[M+Na]+	C15H24O9	Iridoid O-glycosides	VELYAQRXBJLJAK-XKKWFBPMSA-N	OCC1OC(OC2OC=CC3C(O)CC(O)(C)C23)C(O)C(O)C1O	80.18	0.011472	1.20325
1685	Positive	1.811	422.852	Unknown	[M+H]+	null	null	null	null	10.565	0.011526	1.43892
1686	Positive	12.654	297.263	no MS2: 2-(N-butylpropionamido)-N-cyclohexylbutanamide	[M+H]+	C17H32N2O2	Tertiary carboxylic acid amides	QMXGNDITXNMQEK-UHFFFAOYSA-N	CCCCN(C(=O)CC)C(CC)C(=O)NC1CCCCC1	10.225	0.011526	1.42397
1687	Positive	1.138	621.27	no MS2: (E)-6-((7-acetamido-1,2,3-trimethoxy-9-oxo-5,6,7,9-tetrahydrobenzo[a]heptalen-10-yl)amino)-N-(3,4,5,6-tetrahydro-2H-cyclopenta[d]thiazol-2-ylidene)hexanamide	[M+H]+	C33H40N4O6S	Tropones	NIYIYLBOTBYWCY-UHFFFAOYSA-N	O=C(N=C1SC2=C(N1)CCC2)CCCCCNC3=CC=C4C5=C(OC)C(OC)=C(OC)C=C5CCC(NC(=O)C)C4=CC3=O	0.01545	0.011547	1.2045
1688	Positive	1.187	444.707	Unknown	[M+H]+	null	null	null	null	3.9193	0.01158	1.05938
1689	Positive	0.521	148.942	Unknown	[M+H]+	null	null	null	null	70.684	0.011607	1.42479
1690	Positive	1.055	696.286	low score: (2S,3R)-2-(((S)-7-acetamido-1,2,3-trimethoxy-9-oxo-5,6,7,9-tetrahydrobenzo[a]heptalen-10-yl)amino)-N-(3-(3-(furan-2-yl)-1,2,4-oxadiazol-5-yl)propyl)-3-methylpentanamide	[M+Na]+	C36H43N5O8	Isoleucine and derivatives	VODLLOCLAAHTRJ-DBAPWXNWSA-N	O=C1C=C2C(=CC=C1NC(C(=O)NCCCC3=NC(=NO3)C=4OC=CC4)C(C)CC)C5=C(OC)C(OC)=C(OC)C=C5CCC2NC(=O)C	0.015317	0.011623	1.10397
1691	Positive	1.481	484.153	low score: 4-(2-Nitroethyl)phenyl 6-O-?-D-xylopyranosyl-?-D-glucopyranoside	[M+Na]+	C19H27NO12	Phenolic glycosides	ZHVLPKFAODFQST-BMVMOQKNSA-N	O=N(=O)CCC1=CC=C(OC2OC(COC3OCC(O)C(O)C3O)C(O)C(O)C2O)C=C1	5.653	0.011634	1.22079
1692	Negative	1.158	861.999	Unknown	[M-H]-	null	null	null	null	0.10482	0.011634	1.09426
1693	Positive	1.024	810.807	Unknown	[M+H]+	null	null	null	null	50.321	0.011656	1.51362
1694	Positive	6.335	504.339	low score: glutamate conjugated chenodeoxycholic acid	[M-H2O+H]+	C29H47NO7	Glycinated bile acids and derivatives	MHOZNCAVRHAOKT-PYDJSGOHSA-N	O=C(O)CCC(N=C(O)CCC(C)C1CCC2C3C(O)CC4CC(O)CCC4(C)C3CCC12C)C(=O)O	2.408	0.011669	1.32331
1695	Positive	9.004	497.302	no MS2: NCGC00380867-01_C27H46O9_9,12,15-Octadecatrienoic acid, 3-(hexopyranosyloxy)-2-hydroxypropyl ester, (9Z,12Z,15Z)-	[M-H2O+H]+	C27H46O9	Glycosylmonoacylglycerols	HUSISCNTLUEZCN-PDBXOOCHSA-N	CC\C=C/C/C=C\C\C=C/CCCCCCCC(=O)OCC(O)COC1OC(CO)C(O)C(O)C1O	3.6285	0.011669	1.04828
1696	Positive	16.551	758.626	Unknown	[M+H]+	null	null	null	null	0.43361	0.011671	1.52665
1697	Positive	13.954	284.315	Unknown	[M+H]+	null	null	null	null	26.433	0.011705	1.25311
1698	Positive	1.048	706.897	Unknown	[M+H]+	null	null	null	null	4.0924	0.011709	1.21155
1699	Positive	17.695	490.462	Unknown	[M+H]+	null	null	null	null	0.48583	0.01171	1.38799
1700	Positive	14.302	285.301	low score: N-[3-(Dimethylamino)propyl]dodecanamide	[M+H]+	C17H36N2O	N-acyl amines	TWMFGCHRALXDAR-UHFFFAOYSA-N	CCCCCCCCCCCC(=O)NCCCN(C)C	29.784	0.011748	1.29445
1701	Positive	10.265	393.243	low score: monolinolein	[M+K]+	C21H38O4	Lineolic acids and derivatives	WECGLUPZRHILCT-HZJYTTRNSA-N	O=C(OCC(O)CO)CCCCCCCC=CCC=CCCCCC	4.7513	0.011749	1.08041
1702	Positive	0.75	111.976	Unknown	[M+H]+	null	null	null	null	30.137	0.011762	1.34349
1703	Positive	13.513	407.304	low score: 5-[1,2,4a-trimethyl-5-(3-methylbutanoyloxymethyl)-2,3,4,7,8,8a-hexahydronaphthalen-1-yl]-3-methylpentanoic acid	[M+H]+	C25H42O4	Colensane and clerodane diterpenoids	FISIJWVRKFHLSM-UHFFFAOYSA-N	O=C(O)CC(C)CCC1(C)C(C)CCC2(C(=CCCC21)COC(=O)CC(C)C)C	0.496	0.011762	1.58954
1704	Positive	1.165	544.303	no MS2: NCGC00381301-01![6-acetyloxy-7-hydroxy-1-(3-methylbutanoyloxy)-7-(3-methylbutanoyloxymethyl)-4a,5,6,7a-tetrahydro-1H-cyclopenta[c]pyran-4-yl]methyl 3-methylbutanoate [IIN-based: Match]	[M+NH4]+	C27H42O10	Tetracarboxylic acids and derivatives	DCZPAFXGNAJXHQ-UHFFFAOYSA-N	CC(C)CC(=O)OCC1=COC(OC(=O)CC(C)C)C2C1CC(OC(C)=O)C2(O)COC(=O)CC(C)C	0.014786	0.011762	1.11994
1705	Positive	16.649	984.324	Unknown	[M+H]+	null	null	null	null	22.54	0.011762	0.88894
1706	Positive	13.601	215.139	no MS2: DETHIOBIOTIN	[M+H]+	C10H18N2O3	Medium-chain fatty acids	AUTOLBMXDDTRRT-JGVFFNPUSA-N	C[C@H]1[C@H](NC(=O)N1)CCCCCC(=O)O	4.3618	0.011776	1.27559
1707	Positive	1.183	498.333	low score: "2-((4R)-4-((3R,5R,9S,10S,13R,14S,17R)-3-hydroxy-10,13-dimethylhexadecahydro-1H-cyclopenta[a]phenanthren-17-yl)-N-methylpentanamido)ethane-1-sulfonic acid"	[M+H]+	C27H47NO5S	Taurinated bile acids and derivatives	MFDHSRQWKNAICJ-JSZKKBQESA-N	[H][C@@]12CC[C@]3([H])C[C@H](O)CC[C@]3(C)[C@H]1CC[C@@]4(C)[C@H]2CC[C@@H]4[C@@H](CCC(N(C)CCS(=O)(O)=O)=O)C	0.0098541	0.011789	1.17507
1708	Positive	14.304	247.185	low score: Sophocarpine	[M+H]+	C15H22N2O	Matrine alkaloids	AAGFPTSOPGCENQ-JLNYLFASSA-N	C1C[C@H]2CN3[C@H](CC=CC3=O)[C@@H]4[C@H]2N(C1)CCC4	52.17	0.011794	1.57477
1709	Positive	1.101	822.815	Unknown	[M+H]+	null	null	null	null	7.0662	0.011809	1.10884
1710	Positive	13.601	157.096	no MS2: Unknown (carbon number 8); PlaSMA ID-276	[M+H]+	C8H12O3	Unknown	null	null	5.7898	0.011829	1.3909
1711	Positive	14.38	285.301	Unknown	[M+H]+	null	null	null	null	28.526	0.011835	1.3041
1712	Positive	14.85	136.034	no MS2: 2-Benzoxazolinone; CE0; ASSKVPFEZFQQNQ-UHFFFAOYSA-N	[M+H]+	C7H5NO2	Benzoxazolones	ASSKVPFEZFQQNQ-UHFFFAOYSA-N	c1ccc2c(c1)nc(O)o2	3.2774	0.011845	1.40503
1713	Positive	10.496	646.327	Aconitine	[M+H]+	C34H47NO11	Aconitane-type diterpenoid alkaloids	XFSBVAOIAHNAPC-HLBYDYOGSA-N	O=C(OC1C2C3CC1(O)C(OC)C(O)C2(OC(=O)C)C4C(OC)C5C6(COC)CN(CC)C4C35C(OC)CC6O)C=7C=CC=CC7	122.07	0.011845	1.47744
1714	Positive	7.139	219.191	low score: Tributylphosphine oxide	[M+H]+	C12H27OP	Organophosphine oxides	MNZAKDODWSQONA-UHFFFAOYSA-N	CCCCP(=O)(CCCC)CCCC	10.152	0.011849	1.55588
1715	Positive	0.535	275.818	Unknown	[M+H]+	null	null	null	null	150.2	0.011862	1.5196
1716	Positive	8.841	230.157	Unknown	[M+H]+	null	null	null	null	6.1962	0.011862	1.33604
1717	Positive	8.668	230.159	Unknown	[M+H]+	null	null	null	null	5.3413	0.011862	1.3206
1718	Positive	17.639	711.536	Unknown	[M+H]+	null	null	null	null	10.414	0.011898	1.07376
1719	Positive	6.302	333.175	low score: Isoxaben	[M+H]+	C18H24N2O4	Dimethoxybenzenes	PMHURSZHKKJGBM-UHFFFAOYSA-N	CCC(C)(CC)C1=NOC(=C1)NC(=O)C2=C(C=CC=C2OC)OC	17.841	0.011932	1.15182
1720	Positive	7.806	432.269	low score: NCGC00381130-01!methyl (2E,8E)-9-[3a-hydroxy-6,7-dimethyl-1-(2-methylpropyl)-3-oxo-2,4,7,7a-tetrahydro-1H-isoindol-4-yl]-4,5-dihydroxy-8-methylnona-2,8-dienoate [IIN-based on: CCMSLIB00000846918]	[M-H2O+H]+	C25H39NO6	Bicyclic monoterpenoids	YUXUTEAAGHFKKH-MKQCFFQWSA-N	COC(=O)\\C=C\\C(O)C(O)CC\\C(C)=C\\C1C=C(C)C(C)C2C(CC(C)C)NC(=O)C12O	61.276	0.011934	1.41246
1721	Positive	13.418	415.373	Unknown	[M+H]+	null	null	null	null	115.89	0.011947	1.35234
1722	Positive	6.244	826.326	Unknown	[M+H]+	null	null	null	null	25.141	0.011976	1.02608
1723	Positive	0.443	210.926	Unknown	[M+H]+	null	null	null	null	38.585	0.011979	1.26318
1724	Positive	0.569	223.079	no MS2: 2-methylanthra-9,10-quinone	[M+H]+	C15H10O2	Anthraquinones	NJWGQARXZDRHCD-UHFFFAOYSA-N	O=C1C=2C=CC=CC2C(=O)C3=CC(=CC=C13)C	3.8494	0.011979	1.49915
1725	Positive	13.671	519.177	no MS2: 3,5-dihydroxy-2-(4-hydroxyphenyl)-8-(3-methylbut-2-en-1-yl)-7-(((2S,3R,4S,5S,6R)-3,4,5-trihydroxy-6-(hydroxymethyl)tetrahydro-2H-pyran-2-yl)oxy)chroman-4-one	[M+H-H2O]+	C26H30O11	Flavonoid-7-O-glycosides	GRDZTDZJQRPNCN-GHYODRBMSA-N	O=C1C2=C(O)C=C(OC3OC(CO)C(O)C(O)C3O)C(=C2OC(C4=CC=C(O)C=C4)C1O)CC=C(C)C	43.396	0.011979	1.47195
1726	Positive	14.049	284.315	Unknown	[M+H]+	null	null	null	null	24.681	0.011979	1.04995
1727	Positive	12.511	359.27	Unknown	[M+H]+	null	null	null	null	14.299	0.011979	1.09739
1728	Positive	14.312	373.125	no MS2: NCGC00381050-01!7-(5,7-dimethoxy-4-oxochromen-2-yl)-6-hydroxyheptanoic acid [IIN-based on: CCMSLIB00000845870]	[M+Na]+	C18H22O7	Chromones	CRHUZHVITSVUHQ-UHFFFAOYSA-N	COC1=CC(OC)=C2C(=O)C=C(CC(O)CCCCC(O)=O)OC2=C1	32.824	0.011979	1.26315
1729	Positive	6.923	561.406	low score: Diacetylpyxinol	[M+H]+	C34H56O6	Triterpene saponins	TWRWTOXPYGQKPW-ZWXXETMRSA-N	CC1(C(C2(CCC1OC(C)=O)C)CCC3(C2CC(O)C4[C@]3(CCC4[C@]5(C)O[C@@H](C(C)(OC(C)=O)C)CC5)C)C)C	0.018817	0.011979	1.19565
1730	Positive	9.139	740.48	no MS2: Pseudacyclin A	[M+H]+	C39H61N7O7	Cyclic peptides	RGAWRDNXJUOZMG-UHFFFAOYSA-N	C1CCC(NC(=O)C(NC(=O)C)C(C)CC)C(=O)NC(CC2=CC=CC=C2)C(=O)N2CCCC2C(=O)NC(C(CC)C)C(=O)NC(C(CC)C)C(=O)N1	7.5055	0.011979	0.966337
1731	Positive	14.493	124.096	HISTIDINOL	[M-H2O+H]+	C6H11N3O	Aralkylamines	ZQISRDCJNBUVMM-YFKPBYRVSA-N	N[C@H](CO)CC1=CN=CN1	6.8614	0.011986	1.6086
1732	Positive	14.304	381.326	Unknown	[M+H]+	null	null	null	null	2331	0.011986	1.55203
1733	Positive	18.087	445.155	no MS2: Halometasone	[M+H]+	C22H27ClF2O5	21-hydroxysteroids	GGXMRPUKBWXVHE-MIHLVHIWSA-N	O=C1C=C2C(F)CC3C4CC(C)C(O)(C(=O)CO)C4(C)CC(O)C3(F)C2(C=C1Cl)C	8.9029	0.011986	1.16949
1734	Positive	16.093	369.366	low score: Coprostanone	[M-H2O+H]+	C27H46O	Cholesterols and derivatives	PESKGJQREUXSRR-JAGYRSRJSA-N	C(C)(C1)(C(C(C)CCCC(C)C)4)C(CC4)C(C2)C(C(C)(C3)C([H])(CC(C3)=O)C2)C1	21.477	0.012001	1.26722
1735	Positive	6.362	386.268	low score: Buspirone	[M+H]+	C21H31N5O2	N-arylpiperazines	QWCRAEMEVRGPNT-UHFFFAOYSA-N	O=C1CC2(CCCC2)CC(=O)N1CCCCN1CCN(CC1)C1=NC=CC=N1	2.0346	0.012001	1.17788
1736	Positive	16.139	321.339	Unknown	[M+H]+	null	null	null	null	12.095	0.012005	1.34473
1737	Positive	14.319	640.631	Unknown	[M+H]+	null	null	null	null	14.97	0.012005	1.29917
1738	Positive	1.15	576.277	low score: (NAG)(NAM)-AqKAA[3-NH2-AGG]	[M+2H]2+	C46H78N12O22	Polypeptides	CJQAAXIMDRPPCE-UHFFFAOYSA-N	CC(=O)NC1C(OC2C(CO)OC(O)C(NC(C)=O)C2OC(C)C(=O)NC(C)C(=O)NC(CCC(=O)NC(CCCCNC(=O)C(C)NC(=O)CNC(=O)CN)C(=O)NC(C)C(=O)NC(C)C(=O)O)C(N)=O)OC(CO)C(O)C1O	0.0094728	0.012005	1.13011
1739	Positive	14.299	371.128	no MS2: Ajugol	[M+Na]+	C15H24O9	Iridoid O-glycosides	VELYAQRXBJLJAK-XKKWFBPMSA-N	OCC1OC(OC2OC=CC3C(O)CC(O)(C)C23)C(O)C(O)C1O	33.69	0.012018	1.35247
1740	Positive	0.666	107.912	Unknown	[M+H]+	null	null	null	null	50.547	0.012023	1.4095
1741	Positive	11.652	355.308	Unknown	[M+H]+	null	null	null	null	32.326	0.012023	1.3822
1742	Positive	0.811	298.083	low score: Albendazole Sulfone	[M+H]+	C12H15N3O4S	2-benzimidazolylcarbamic acid esters	CLSJYOLYMZNKJB-UHFFFAOYSA-N	CCCS(=O)(=O)c1ccc2c(c1)[nH]c(n2)/N=C(\O)/OC	4.2133	0.012023	0.975391
1743	Positive	6.514	405.239	low score: Hydrocortisonacetate	[M+H]+	C23H32O6	Gluco/mineralocorticoids, progestogins and derivatives	ALEXXDVDDISNDU-JZYPGELDSA-N	CC(=O)OCC(=O)[C@@]1(O)CC[C@H]2[C@@H]3CCC4=CC(=O)CC[C@]4(C)[C@H]3[C@@H](O)C[C@]12C	7.2193	0.012055	1.0898
1744	Positive	0.832	114.102	low score: Unknown (carbon number 6); PlaSMA ID-45	[M+H]+	C6H11NO	Unknown	null	null	3.3696	0.012058	1.50636
1745	Positive	14.976	442.441	Unknown	[M+H]+	null	null	null	null	0.4952	0.012059	1.49187
1746	Positive	8.782	219.191	low score: Tributylphosphine oxide	[M+H]+	C12H27OP	Organophosphine oxides	MNZAKDODWSQONA-UHFFFAOYSA-N	CCCCP(=O)(CCCC)CCCC	2.4664	0.012066	1.27438
1747	Positive	1.184	480.32	low score: "2-((4R)-4-((3R,5R,9S,10S,13R,14S,17R)-3-hydroxy-10,13-dimethylhexadecahydro-1H-cyclopenta[a]phenanthren-17-yl)-N-methylpentanamido)ethane-1-sulfonic acid"	[M-H2O+H]+	C27H47NO5S	Taurinated bile acids and derivatives	MFDHSRQWKNAICJ-JSZKKBQESA-N	[H][C@@]12CC[C@]3([H])C[C@H](O)CC[C@]3(C)[C@H]1CC[C@@]4(C)[C@H]2CC[C@@H]4[C@@H](CCC(N(C)CCS(=O)(O)=O)=O)C	0.011444	0.012066	1.21026
1748	Positive	12.36	124.096	no MS2: HISTIDINOL	[M-H2O+H]+	C6H11N3O	Aralkylamines	ZQISRDCJNBUVMM-YFKPBYRVSA-N	N[C@H](CO)CC1=CN=CN1	4.0135	0.012125	1.58477
1749	Positive	0.559	233.871	Unknown	[M+H]+	null	null	null	null	74.162	0.012125	1.40419
1750	Positive	0.382	331.235	low score: 17alpha-Hydroxyprogesterone	[M+H]+	C21H30O3	Gluco/mineralocorticoids, progestogins and derivatives	DBPWSSGDRRHUNT-UHFFFAOYSA-N	CC(=O)C1(O)CCC2C3CCC4=CC(=O)CCC4(C)C3CCC12C	3.6752	0.012125	1.17379
1751	Positive	11.926	380.381	Unknown	[M+H]+	null	null	null	null	0.49819	0.012152	1.1998
1752	Positive	0.661	100.084	no MS2: 2-Piperidone; CE0; XUWHAWMETYGRKB-UHFFFAOYSA-N	[M+H]+	C5H9NO	Piperidinones	XUWHAWMETYGRKB-UHFFFAOYSA-N	C1CCN=C(C1)O	6.7851	0.012153	1.45929
1753	Positive	0.624	235.224	low score: (1R,2R,5R,7S)-2-cyclopentyl-5,7-dimethyl-1,3-diazaadamantane	[M+H]+	C15H26N2	Diazinanes	ZKHXDVJFFSPXFK-QKDCVEJESA-N	N12CC3(C)CN(CC(C)(C1)C3)C2C4CCCC4	5.2057	0.012153	1.53321
1754	Positive	11.28	451.396	low score: Epifriedelanol	[M+Na]+	C30H52O	Triterpenoids	XCDQFROEGGNAER-PFOIMGGJSA-N	OC1CCC2C(C)(CCC3C2(C)CCC4(C)C5CC(C)(C)CCC5(C)CCC34C)C1C	3.3239	0.012153	1.1856
1755	Positive	12.963	368.45	Unknown	[M+H]+	null	null	null	null	11.593	0.01216	1.23375
1756	Positive	6.489	443.316	low score: NCGC00380758-01!(2S,3R,10R,13R,14S)-17-[(2R,3R,5S)-2,3-dihydroxy-5,6-dimethylheptan-2-yl]-2,3,14-trihydroxy-10,13-dimethyl-2,3,4,5,9,11,12,15,16,17-decahydro-1H-cyclopenta[a]phenanthren-6-one [IIN-based on: CCMSLIB00000848325]	[M-2H2O+H]+	C28H46O6	Pentahydroxy bile acids, alcohols and derivatives	KQBCIGPPRFLKLS-VVHPDZBTSA-N	CC(C)[C@@H](C)C[C@@H](O)[C@](C)(O)C1CC[C@@]2(O)C3=CC(=O)C4C[C@@H](O)[C@@H](O)C[C@]4(C)C3CC[C@]12C	8.9728	0.012163	1.45419
1757	Positive	14.38	267.286	Unknown	[M+H]+	null	null	null	null	863.86	0.012166	1.37853
1758	Positive	9.529	114.102	low score: Unknown (carbon number 6); PlaSMA ID-45	[M+H]+	C6H11NO	Unknown	null	null	6.2294	0.012213	1.62705
1759	Positive	12.294	387.34	Unknown	[M+H]+	null	null	null	null	0.49392	0.012213	1.45955
1760	Positive	13.8	376.292	Unknown	[M+H]+	null	null	null	null	3.9577	0.012213	0.995188
1761	Positive	15.763	413.293	low score: 2-methyl-2-(3-pentadecylphenoxy)propanoic acid	[M+Na]+	C25H42O3	Phenoxyacetic acid derivatives	SQSAOEAQCNWNBE-UHFFFAOYSA-N	O=C(O)C(C)(C)OC1=CC(CCCCCCCCCCCCCCC)=CC=C1	3.9112	0.012216	1.38338
1762	Positive	13.503	371.128	no MS2: 1-[2-hydroxy-4-(3-hydroxy-5-methylphenoxy)-6-methylphenyl]-3-methylbutane-2,3-diol	[M+K]+	C19H24O5	Diphenylethers	FLLRZSQAKUHACV-UHFFFAOYSA-N	OC=1C=C(OC2=CC(O)=C(C(=C2)C)CC(O)C(O)(C)C)C=C(C1)C	15.998	0.012231	1.25777
1763	Positive	14.38	341.329	Unknown	[M+H]+	null	null	null	null	976.91	0.012256	1.41322
1764	Positive	1.098	372.994	Unknown	[M+H]+	null	null	null	null	2.6806	0.012256	0.946057
1765	Positive	1.282	169.05	no MS2: METHYGLUTARATE	[M+Na]+	C6H10O4	Methyl-branched fatty acids	XJMMNTGIMDZPMU-UHFFFAOYSA-N	CC(CC(O)=O)CC(O)=O	6.1752	0.012258	1.09265
1766	Positive	6.127	328.183	no MS2: Tetrameprozine	[M+H]+	C19H25N3S	Phenothiazines	YZQNFFLGIYEXMM-UHFFFAOYSA-N	CN(C)CC(N(C)C)CN(c21)c(c3)c(ccc3)Sc(cccc2)1	2.3651	0.012258	0.894082
1767	Positive	15.274	628.238	low score: NCGC00385646-01!7-[(2S,3R,4S,5S,6R)-4,5-dihydroxy-6-(hydroxymethyl)-3-[(2S,3R,4R,5R,6S)-3,4,5-trihydroxy-6-methyloxan-2-yl]oxyoxan-2-yl]oxy-5-hydroxy-2-(4-hydroxy-3-methoxyphenyl)-2,3-dihydrochromen-4-one	[M+NH4]+	C28H34O15	Flavonoid-7-O-glycosides	AODBEDTXATXPNK-FCNYPLLVSA-N	COC1=C(O)C=CC(=C1)C2CC(=O)C3=C(O)C=C(O[C@@H]4O[C@H](CO)[C@@H](O)[C@H](O)[C@H]4O[C@@H]5O[C@@H](C)[C@H](O)[C@@H](O)[C@H]5O)C=C3O2	339.98	0.012261	1.23716
1768	Positive	8.494	382.301	low score: 5-[(1S,2R,4aR)-5-(acetyloxymethyl)-1,2,4a-trimethyl-2,3,4,7,8,8a-hexahydronaphthalen-1-yl]-3-methylpentanoic acid_major	[M+NH4]+	C22H36O4	Colensane and clerodane diterpenoids	QSEIUMVWJJWZJP-PXZOOIHESA-N	CC(=O)OCC1=CCCC2C1(C)CCC(C)C2(C)CCC(C)CC(=O)O	4.2187	0.012261	0.891085
1769	Positive	0.603	243.845	Unknown	[M+H]+	null	null	null	null	241.59	0.012264	1.55423
1770	Positive	11.652	377.293	low score: "(4R)-4-((3R,5S,9S,10S,13R,14S,17R)-3-hydroxy-10,13-dimethylhexadecahydro-1H-cyclopenta[a]phenanthren-17-yl)pentanoic acid"	[M+H]+	C24H40O3	Monohydroxy bile acids, alcohols and derivatives	SMEROWZSTRWXGI-NWFSOSCSSA-N	C[C@@]12[C@](CC[C@]3([H])[C@@H]2CC[C@@]4(C)[C@H]3CC[C@@H]4[C@@H](CCC(O)=O)C)([H])C[C@H](O)CC1	79.606	0.012264	1.32747
1771	Positive	1.038	305.984	Unknown	[M+H]+	null	null	null	null	3.0954	0.012264	1.14732
1772	Positive	8.55	542.363	low score: NCGC00381175-01!3-hydroxy-2-[[3-[3-(3-hydroxy-6-methylheptanoyl)oxy-6-methylheptanoyl]oxy-8-methylnonanoyl]amino]propanoic acid [IIN-based on: CCMSLIB00000848442]	[M-H2O+H]+	C29H53NO9	N-acyl-alpha amino acids	MWZPHNZNPKKSEI-UHFFFAOYSA-N	CC(C)CCCCC(CC(=O)NC(CO)C(O)=O)OC(=O)CC(CCC(C)C)OC(=O)CC(O)CCC(C)C	4.6562	0.012264	1.13969
1773	Negative	1.173	618.159	Unknown	[M-H]-	null	null	null	null	0.070405	0.012264	1.34133
1774	Positive	1.175	602.705	Unknown	[M+H]+	null	null	null	null	9.197	0.012271	1.1823
1775	Positive	19.313	982.325	Unknown	[M+H]+	null	null	null	null	5.1316	0.012271	0.827311
1776	Positive	14.321	310.332	Unknown	[M+H]+	null	null	null	null	216.15	0.012304	1.52103
1777	Positive	6.261	459.312	low score: Ganoderal A	[M+Na]+	C30H44O2	Triterpenoids	RHNFCIPJKSUUES-FLXXZUNSSA-N	O=CC(=CCCC(C)C1CCC2(C3=CCC4C(C(=O)CCC4(C3=CCC12C)C)(C)C)C)C	14.809	0.012304	1.51919
1778	Positive	0.727	302.822	Unknown	[M+H]+	null	null	null	null	438.7	0.012304	1.47144
1779	Positive	11.385	355.31	Unknown	[M+H]+	null	null	null	null	4.2763	0.012304	1.23264
1780	Positive	8.999	478.365	low score: "((4R)-4-((3R,5S,7R,9S,10S,13R,14S,17R)-3,7-dihydroxy-10,13-dimethylhexadecahydro-1H-cyclopenta[a]phenanthren-17-yl)-2,2-dimethylpentanoyl)glycine"	[M+H-H2O]+	C28H47NO5	Glycinated bile acids and derivatives	HQPHGZUTNNVZLH-BOWXQMHNSA-N	[H][C@@]12[C@@H](O)C[C@@H]3C[C@H](O)CC[C@]3(C)[C@H]1CC[C@@]4(C)[C@H]2CC[C@@H]4[C@@H](CC(C)(C)C(NCC(O)=O)=O)C	3.118	0.012304	1.13186
1781	Positive	9.025	821.023	Unknown	[M+H]+	null	null	null	null	8.3916	0.012304	0.902547
1782	Positive	13.089	100.083	no MS2: 2-Piperidone; CE0; XUWHAWMETYGRKB-UHFFFAOYSA-N	[M+H]+	C5H9NO	Piperidinones	XUWHAWMETYGRKB-UHFFFAOYSA-N	C1CCN=C(C1)O	18.296	0.012347	1.49268
1783	Positive	0.452	130.966	Unknown	[M+H]+	null	null	null	null	122.06	0.012369	1.45172
1784	Positive	8.902	436.313	low score: Solasodine	[M+Na]+	C27H43NO2	Spirosolanes and derivatives	KWVISVAMQJWJSZ-VKROHFNGSA-N	OC1CC2=CCC3C(CCC4(C)C3CC5OC6(NCC(C)CC6)C(C)C54)C2(C)CC1	13.525	0.01237	1.24625
1785	Positive	0.918	516.336	low score: Threonine conjugated chenodeoxycholic acid	[M+Na]+	C28H47NO6	Glycinated bile acids and derivatives	FDLBWFQZCBIUPV-JPWRXKRQSA-N	C[C@H](CCC(N[C@@H]([C@@H](C)O)C(O)=O)=O)[C@H]1CC[C@@]2([H])[C@]3([H])[C@H](O)C[C@]4([H])C[C@H](O)CC[C@]4(C)[C@H]3CC[C@@]21C	0.013321	0.012372	1.13731
1786	Positive	6.509	502.358	Unknown	[M+H]+	null	null	null	null	6.3455	0.012377	1.24893
1787	Positive	14.026	267.288	Unknown	[M+H]+	null	null	null	null	35.22	0.012386	1.12641
1788	Positive	0.643	119.986	Unknown	[M+H]+	null	null	null	null	67.983	0.01239	1.46281
1789	Positive	1.709	131.939	Unknown	[M+H]+	null	null	null	null	224.25	0.01239	1.52364
1790	Positive	0.068	282.071	no MS2: skimmianine	[M+Na]+	C14H15NO4	Dihydrofuranoquinolines	CKDKGHDDRAMHGK-UHFFFAOYSA-N	N=1C=2OCCC2C(OC)=C3C=CC(OC)=C(OC)C13	3.6741	0.01239	1.42223
1791	Positive	1.141	496.806	Unknown	[M+H]+	null	null	null	null	5.9212	0.012395	1.05903
1792	Positive	1.166	309.071	no MS2: prangolarine	[M+Na]+	C16H14O5	Psoralens	QTAGQHZOLRFCBU-ZDUSSCGKSA-N	O=C1OC=2C=C3OC=CC3=C(OCC4OC4(C)C)C2C=C1	24.82	0.012415	1.14721
1793	Positive	13.386	100.084	no MS2: 2-Piperidone; CE0; XUWHAWMETYGRKB-UHFFFAOYSA-N	[M+H]+	C5H9NO	Piperidinones	XUWHAWMETYGRKB-UHFFFAOYSA-N	C1CCN=C(C1)O	19.078	0.012419	1.49224
1794	Positive	0.705	166.911	Unknown	[M+H]+	null	null	null	null	39.508	0.012419	1.52625
1795	Positive	11.588	538.425	Unknown	[M+H]+	null	null	null	null	3.3758	0.01242	0.784199
1796	Positive	7.805	504.332	low score: glutamate conjugated chenodeoxycholic acid	[M-H2O+H]+	C29H47NO7	Glycinated bile acids and derivatives	MHOZNCAVRHAOKT-PYDJSGOHSA-N	O=C(O)CCC(N=C(O)CCC(C)C1CCC2C3C(O)CC4CC(O)CCC4(C)C3CCC12C)C(=O)O	43.162	0.012436	1.40288
1797	Negative	1.172	764.048	no MS2: PFSM-ammonio; [C18H22F17N2O7S2]+	[M-H]-	C18H22F17N2O7S2	Perfluorooctane sulfonic acid and derivatives	IOSUBRGBUWQZMF-UHFFFAOYSA-O	O=C(O)CN(CCC[N+](C)(C)CCCS(=O)(=O)O)S(=O)(=O)C(F)(F)C(F)(F)C(F)(F)C(F)(F)C(F)(F)C(F)(F)C(F)(F)C(F)(F)F	0.10733	0.012436	1.11718
1798	Positive	8.449	500.313	low score: Taurodeoxycholate	[M+H]+	C26H45NO6S	Taurinated bile acids and derivatives	AWDRATDZQPNJFN-VAYUFCLWSA-N	C[C@H](CC/C(=N/CCS(=O)(=O)O)/O)[C@H]1CC[C@@H]2[C@@]1([C@H](C[C@H]3[C@H]2CC[C@H]4[C@@]3(CC[C@H](C4)O)C)O)C	14.076	0.012452	0.993844
1799	Positive	9.185	588.272	Unknown	[M+H]+	null	null	null	null	118.7	0.012487	1.3414
1800	Positive	13.551	548.349	Unknown	[M+H]+	null	null	null	null	0.45256	0.012487	1.2867
1801	Negative	1.258	528.238	Unknown	[M-H]-	null	null	null	null	0.042635	0.012487	1.07452
1802	Negative	1.288	614.208	Unknown	[M-H]-	null	null	null	null	0.1046	0.012487	1.1023
1803	Positive	0.649	102.02	Unknown	[M+H]+	null	null	null	null	93.66	0.012491	1.60457
1804	Positive	0.438	208.93	Unknown	[M+H]+	null	null	null	null	45.403	0.012491	1.34329
1805	Positive	0.45	101.948	Unknown	[M+H]+	null	null	null	null	8.9801	0.012497	1.42866
1806	Positive	14.723	235.223	no MS2: (1R,2R,5R,7S)-2-cyclopentyl-5,7-dimethyl-1,3-diazaadamantane	[M+H]+	C15H26N2	Diazinanes	ZKHXDVJFFSPXFK-QKDCVEJESA-N	N12CC3(C)CN(CC(C)(C1)C3)C2C4CCCC4	8.487	0.012498	1.45875
1807	Positive	0.743	115.966	Unknown	[M+H]+	null	null	null	null	17.516	0.012506	1.52729
1808	Positive	1.74	100.083	N-Methyl-2-pyrrolidone	[M+H]+	C5H9NO	N-alkylpyrrolidines	SECXISVLQFMRJM-UHFFFAOYSA-N	CN1CCCC1=O	8.3731	0.012516	1.46756
1809	Positive	14.747	100.084	no MS2: 2-Piperidone; CE0; XUWHAWMETYGRKB-UHFFFAOYSA-N	[M+H]+	C5H9NO	Piperidinones	XUWHAWMETYGRKB-UHFFFAOYSA-N	C1CCN=C(C1)O	15.663	0.012516	1.46522
1810	Positive	0.459	128.952	Unknown	[M+H]+	null	null	null	null	141.99	0.012516	1.49471
1811	Positive	13.521	124.097	HISTIDINOL	[M-H2O+H]+	C6H11N3O	Aralkylamines	ZQISRDCJNBUVMM-YFKPBYRVSA-N	N[C@H](CO)CC1=CN=CN1	6.4599	0.012516	1.54034
1812	Positive	14.38	381.324	Unknown	[M+H]+	null	null	null	null	2733.6	0.012516	1.52781
1813	Positive	0.75	284.854	Unknown	[M+H]+	null	null	null	null	246.64	0.012516	1.46187
1814	Positive	0.545	519.178	no MS2: 3,5-dihydroxy-2-(4-hydroxyphenyl)-8-(3-methylbut-2-en-1-yl)-7-(((2S,3R,4S,5S,6R)-3,4,5-trihydroxy-6-(hydroxymethyl)tetrahydro-2H-pyran-2-yl)oxy)chroman-4-one	[M+H]+	C26H30O11	Flavonoid-7-O-glycosides	GRDZTDZJQRPNCN-GHYODRBMSA-N	O=C1C2=C(O)C=C(OC3OC(CO)C(O)C(O)C3O)C(=C2OC(C4=CC=C(O)C=C4)C1O)CC=C(C)C	25.305	0.012569	1.54108
1815	Positive	14.336	355.098	no MS2: [1-hydroxy-1-(4-methoxyphenyl)propan-2-yl] 4-methoxybenzoate	[M+K]+	C18H20O5	P-methoxybenzoic acids and derivatives	MHJLKHNHGMUAPQ-UHFFFAOYSA-N	O=C(OC(C)C(O)C1=CC=C(OC)C=C1)C2=CC=C(OC)C=C2	16.521	0.012573	1.43198
1816	Positive	1.638	100.083	N-Methyl-2-pyrrolidone	[M+H]+	C5H9NO	N-alkylpyrrolidines	SECXISVLQFMRJM-UHFFFAOYSA-N	CN1CCCC1=O	8.6687	0.012574	1.48885
1817	Positive	12.656	282.299	Unknown	[M+H]+	null	null	null	null	7.3645	0.012574	1.55006
1818	Positive	11.151	538.426	Unknown	[M+H]+	null	null	null	null	3.2509	0.012583	1.2474
1819	Positive	1.22	647.438	Unknown	[M+H]+	null	null	null	null	0.024829	0.012589	0.997804
1820	Positive	6.382	131.94	Unknown	[M+H]+	null	null	null	null	234.97	0.012594	1.47932
1821	Positive	1.037	658.89	Unknown	[M+H]+	null	null	null	null	19.377	0.012596	1.33838
1822	Positive	18.087	716.62	Unknown	[M+H]+	null	null	null	null	0.47903	0.012601	1.07994
1823	Positive	14.377	100.083	no MS2: 2-Piperidone; CE0; XUWHAWMETYGRKB-UHFFFAOYSA-N	[M+H]+	C5H9NO	Piperidinones	XUWHAWMETYGRKB-UHFFFAOYSA-N	C1CCN=C(C1)O	17.634	0.012613	1.47025
1824	Positive	6.49	488.305	low score: glycocholic acid	[M+Na]+	C26H43NO6	Glycinated bile acids and derivatives	RFDAIACWWDREDC-VKRKCYKBSA-N	C[C@H](CCC(=O)NCC(=O)O)[C@H]1CC[C@@H]2[C@@]1([C@H](C[C@H]3[C@H]2[C@@H](C[C@H]4[C@@]3(CC[C@H](C4)O)C)O)O)C	2.2507	0.012613	1.12151
1825	Positive	8.428	520.341	LPC 18:2; PlaSMA ID-2753	[M+H]+	C26H50NO7P	Lipids	SPJFYYJXNPEZDW-UHFFFAOYNA-N	O=C(OCC(O)COP(=O)([O-])OCC[N+](C)(C)C)CCCCCCCC=CCC=CCCCCC	4.9591	0.012613	0.988775
1826	Positive	1.061	800.86	Unknown	[M+H]+	null	null	null	null	4.6585	0.012613	1.00956
1827	Positive	14.323	356.098	no MS2: NCGC00180355-02_C21H13N3O3_	[M+H]+	C21H13N3O3	Quinazolines	NUBAAWQBTGSVGH-UHFFFAOYSA-N	OC1=C2N3C(=O)C4=C(C=CC=C4)/N=C3/C5=C(NC(=O)C2=CC=C1)C=CC=C5	15.017	0.012614	1.30404
1828	Positive	13.424	247.184	no MS2: Milnacipran	[M+H]+	C15H22N2O	Phenylacetamides	GJJFMKBJSRMPLA-HIFRSBDPSA-N	O=C(N(CC)CC)C1(C=2C=CC=CC2)CC1CN	67.201	0.012631	1.59425
1829	Positive	0.229	301.142	low score: angoletin	[M+H]+	C18H20O4	2'-Hydroxy-dihydrochalcones	HBRYKWADRULLHU-UHFFFAOYSA-N	O=C(C=1C(O)=C(C(O)=C(C1OC)C)C)CCC=2C=CC=CC2	2.2637	0.012653	1.16813
1830	Positive	1.061	732.857	Unknown	[M+H]+	null	null	null	null	4.113	0.012653	1.12083
1831	Positive	7.989	158.165	Unknown	[M+H]+	null	null	null	null	23.666	0.012739	1.53894
1832	Positive	14.255	124.096	HISTIDINOL	[M-H2O+H]+	C6H11N3O	Aralkylamines	ZQISRDCJNBUVMM-YFKPBYRVSA-N	N[C@H](CO)CC1=CN=CN1	6.1986	0.012768	1.51628
1833	Positive	13.873	247.185	no MS2: Milnacipran	[M+H]+	C15H22N2O	Phenylacetamides	GJJFMKBJSRMPLA-HIFRSBDPSA-N	O=C(N(CC)CC)C1(C=2C=CC=CC2)CC1CN	59.014	0.012768	1.61568
1834	Positive	1.285	233.996	Unknown	[M+H]+	null	null	null	null	55.638	0.012768	1.47585
1835	Positive	14.301	359.343	Unknown	[M+H]+	null	null	null	null	13577	0.012768	1.35786
1836	Positive	15.518	341.336	low score: docosanoic acid	[M+H]+	C22H44O2	Very long-chain fatty acids	UKMSUNONTOPOIO-UHFFFAOYSA-N	O=C(O)CCCCCCCCCCCCCCCCCCCCC	0.4716	0.012768	1.35183
1837	Positive	6.294	303.163	low score: MMV688939	[M+H]+	C19H18N4	Imidazopyridines	OORSNEDYAQMZLO-UHFFFAOYSA-N	N1=C2C=CC(=CN2C(C3=NN(C=C3)CC=4C=CC=CC4)=C1C)C	2.3334	0.012768	0.948585
1838	Positive	1.061	510.959	Unknown	[M+H]+	null	null	null	null	5.2173	0.012768	1.25664
1839	Positive	12.882	368.45	Unknown	[M+H]+	null	null	null	null	12.416	0.012768	1.19896
1840	Positive	0.429	103.963	Unknown	[M+H]+	null	null	null	null	56.36	0.012772	1.39792
1841	Positive	0.565	284.073	low score: Penconazole	[M+H]+	C13H15Cl2N3	Dichlorobenzenes	WKBPZYKAUNRMKP-UHFFFAOYSA-N	Clc1ccc(c(Cl)c1)C(CCC)Cn2ncnc2	2.2843	0.012785	1.24865
1842	Positive	13.934	267.286	Unknown	[M+H]+	null	null	null	null	30.456	0.012816	1.22857
1843	Positive	12.664	312.338	Unknown	[M+H]+	null	null	null	null	19.197	0.012816	0.78349
1844	Positive	13.181	357.302	MAG	[M+H]+	C21H40O4	1-monoacylglycerols	RZRNAYUHWVFMIP-KTKRTIGZSA-N	CCCCCCCC/C=C\CCCCCCCC(=O)OCC(CO)O	3.5916	0.012816	1.02422
1845	Positive	7.698	233.126	N-Cyclohexyl-2-benzothiazol-amine	[M+H]+	C13H16N2S	Benzothiazoles	UPWPIFMHSFSVLE-UHFFFAOYSA-N	C1CCC(CC1)NC1=NC2=CC=CC=C2S1	3.6206	0.012851	1.17164
1846	Positive	16.139	338.367	Unknown	[M+H]+	null	null	null	null	205.31	0.012851	1.45866
1847	Positive	6.303	356.255	low score: 4-[(E)-3-hydroxy-8,10-dimethyl-2-(methylamino)dodec-6-enyl]phenol	[M+Na]+	C21H35NO2	Amphetamines and derivatives	RNCWKUCWPBNWOH-SOFGYWHQSA-N	OC1=CC=C(C=C1)CC(NC)C(O)CCC=CC(C)CC(C)CC	6.2101	0.012851	1.44936
1848	Positive	8.721	100.083	N-Methyl-2-pyrrolidone	[M+H]+	C5H9NO	N-alkylpyrrolidines	SECXISVLQFMRJM-UHFFFAOYSA-N	CN1CCCC1=O	12.312	0.012852	1.44565
1849	Positive	0.555	150.939	Unknown	[M+H]+	null	null	null	null	13.978	0.012854	1.34088
1850	Positive	12.22	443.366	Unknown	[M+H]+	null	null	null	null	20.659	0.012892	1.40982
1851	Positive	1.299	249.043	low score: 4-methoxy-9H-xanthen-9-one	[M+Na]+	C14H10O3	Xanthones	SYEHHMRXODULBY-UHFFFAOYSA-N	O=C1C=2C=CC=CC2OC=3C(OC)=CC=CC13	40.759	0.012893	1.39168
1852	Positive	6.354	562.382	Unknown	[M+H]+	null	null	null	null	9.0433	0.012895	1.21475
1853	Negative	1.158	824.009	Unknown	[M-H]-	null	null	null	null	0.14535	0.012899	1.09432
1854	Positive	0.762	130.975	Unknown	[M+H]+	null	null	null	null	79.832	0.01291	1.45005
1855	Positive	7.595	240.249	Unknown	[M+H]+	null	null	null	null	54.964	0.01291	1.25619
1856	Positive	0.052	284.072	no MS2: Pesticide6_Penconazole_C13H15Cl2N3_1H-1,2,4-Triazole, 1-[2-(2,4-dichlorophenyl)pentyl]-	[M+H]+	C13H15Cl2N3	Dichlorobenzenes	WKBPZYKAUNRMKP-UHFFFAOYSA-N	CCCC(CN1C=NC=N1)C2=C(C=C(C=C2)Cl)Cl	2.4089	0.01291	1.26265
1857	Positive	1.238	537.302	no MS2: NCGC00380867-01_C27H46O9_9,12,15-Octadecatrienoic acid, 3-(hexopyranosyloxy)-2-hydroxypropyl ester, (9Z,12Z,15Z)-	[M+Na]+	C27H46O9	Glycosylmonoacylglycerols	HUSISCNTLUEZCN-PDBXOOCHSA-N	CC\C=C/C/C=C\C\C=C/CCCCCCCC(=O)OCC(O)COC1OC(CO)C(O)C(O)C1O	0.050376	0.012918	1.08687
1858	Positive	8.534	642.297	no MS2: (NAG)(NAM)-AeOAA[3-NH2-SATA]	[M+2H]2+	C51H86N12O26	Polypeptides	TXJJCTLFGFEMBO-UHFFFAOYSA-N	CC(=O)NC1C(OC2C(CO)OC(O)C(NC(C)=O)C2OC(C)C(=O)NC(C)C(=O)NC(CCC(=O)NC(CCCNC(=O)C(CO)NC(=O)C(C)NC(=O)C(NC(=O)C(C)N)C(C)O)C(=O)NC(C)C(=O)NC(C)C(=O)O)C(=O)O)OC(CO)C(O)C1O	9.4008	0.01292	1.16139
1859	Positive	0.686	264.869	Unknown	[M+H]+	null	null	null	null	137.73	0.012923	1.49356
1860	Positive	1.413	299.102	low score: Amlexanox	[M+H]+	C16H14N2O4	Chromeno[2,3-b]pyridine-5-ones	SGRYPYWGNKJSDL-UHFFFAOYSA-N	O=C(O)C1=CC=2C(=O)C3=CC(=CC=C3OC2N=C1N)C(C)C	2.0356	0.012923	1.44919
1861	Positive	13.438	379.313	conessine	[M+Na]+	C24H40N2	Conanine-type alkaloids	GPLGAQQQNWMVMM-CYFNKAHPSA-N	C1=C2CC(N(C)C)CCC2(C)C3CCC45CN(C)C(C)C5CCC4C3C1	0.49308	0.012923	1.38946
1862	Positive	0.174	447.151	no MS2: NCGC00347669-02!4-(3-acetyl-2,6-dihydroxyphenyl)-2-methoxy-4-[3,4,5-trihydroxy-6-(hydroxymethyl)oxan-2-yl]oxybutanoic acid [IIN-based: Match]	[M+H]+	C19H26O12	Fatty acyl glycosides of mono- and disaccharides	YTEWAPMLXIWBPY-UHFFFAOYSA-N	COC(CC(OC1OC(CO)C(O)C(O)C1O)C2=C(O)C=CC(C(C)=O)=C2O)C(O)=O	4.1956	0.012923	1.17026
1863	Positive	13.856	283.284	Unknown	[M+H]+	null	null	null	null	24.933	0.012937	1.39259
1864	Positive	1.188	514.332	no MS2: 2-[(6,7-dimethoxy-1,2,3,4-tetrahydroisoquinolin-1-yl)methyl]-3-ethyl-9,10-dimethoxy-5-oxido-2,3,4,6,7,11b-hexahydro-1H-benzo[a]quinolizin-5-ium	[M+NH4]+	C29H40N2O5	Emetine alkaloids	SSQAXSNCMRBPGJ-UHFFFAOYSA-N	O=N12CCC3=CC(OC)=C(OC)C=C3C2CC(CC4NCCC5=CC(OC)=C(OC)C=C54)C(CC)C1	0.040004	0.012956	1.16065
1865	Positive	6.183	388.282	low score: NCGC00380796-01_C28H39NO_2-Naphthalenol, decahydro-5-(1H-indol-3-ylmethyl)-1,4a-dimethyl-6-methylene-1-(4-methyl-3-penten-1-yl)-, (1S,2S,4aR,5R,8aR)-	[M-H2O+H]+	C28H39NO	Diterpenoids	SYFJYRUTNACAQV-IPTPSVHJSA-N	CC(C)=CCC[C@]1(C)[C@@H](O)CC[C@]2(C)[C@H](CC3=C[NH]C4=C3C=CC=C4)C(=C)CC[C@@H]12	2.0598	0.012956	1.14768
1866	Positive	13.678	554.217	low score: 7-methoxy-4-(9,10,12,13-tetramethoxy-3-methyl-4,5-dihydro-3H-phenanthro[1,2-d]azepin-2-yl)-2H-chromen-2-one	[M+H]+	C33H31NO7	Phenanthrenes and derivatives	WRJSPKBWGMBBSI-UHFFFAOYSA-N	O=C1OC=2C=C(OC)C=CC2C(=C1)C3=CC=4C(OC)=C(OC)C5=C(C=CC=6C=C(OC)C(OC)=CC65)C4CCN3C	64.103	0.012956	1.13462
1867	Positive	6.35	325.212	low score: Abietic acid	[M+Na]+	C20H30O2	Diterpenoids	RSWGJHLUYNHPMX-UHFFFAOYSA-N	O=C(O)C1(C)CCCC2(C)C3C(C=C(CC3)C(C)C)=CCC12	2.0193	0.012961	1.21585
1868	Positive	1.03	436.889	Unknown	[M+H]+	null	null	null	null	7.3887	0.012961	1.22213
1869	Positive	10.443	646.453	Unknown	[M+H]+	null	null	null	null	31.02	0.012961	1.01492
1870	Positive	1.38	221.167	no MS2: Prilocaine	[M+H]+	C13H20N2O	Alpha amino acid amides	MVFGUOIZUNYYSO-UHFFFAOYSA-N	C1=CC=CC(=C1C)NC(C(NCCC)C)=O	2.1897	0.012984	1.37524
1871	Positive	14.38	739.65	low score: (2E,6E)-3,7,11,15,19,23,27,31,35-nonamethylhexatriaconta-2,6,34-triene-1,11,15,19,23,27,31-heptol	[M+H]+	C45H86O7	Polyprenols	FPJJIWCMASJCHO-NXRGQNTBSA-N	OCC=C(C)CCC=C(C)CCCC(O)(C)CCCC(O)(C)CCCC(O)(C)CCCC(O)(C)CCCC(O)(C)CCCC(O)(C)CCC=C(C)C	413.99	0.012989	1.33508
1872	Positive	1.325	427.124	low score: Desoxyrhaponticin	[M+Na]+	C21H24O8	Stilbene glycosides	MFMQRDLLSRLUJY-DXKBKAGUSA-N	OC=1C=C(OC2OC(CO)C(O)C(O)C2O)C=C(C=CC3=CC=C(OC)C=C3)C1	6.3301	0.012989	1.23437
1873	Positive	13.884	380.235	no MS2: CP-401387	[M+H]+	C23H29N3O2	Indazoles	PRUGWHGQBHEDAX-QXONSOMPSA-N	CCC1=NN(C2CCCCC2)C2=C1C=CC(=C2)[C@]1(CC[C@@H](CC1)C(O)=O)C#N	13.518	0.012989	1.05948
1874	Positive	6.354	504.301	no MS2: Alpha-Dihydrogedunol	[M+NH4]+	C28H38O7	Limonoids	IVHWWYNBMIROCV-AJIQNVKKSA-N	O=C(OC1CC2C(C)(C)C(O)CCC2(C)C3CCC4(C)C(OC(=O)C5OC54C13C)C6=COC=C6)C	3.0514	0.012994	0.829205
1875	Positive	15.518	376.378	Unknown	[M+H]+	null	null	null	null	0.47076	0.012995	1.34857
1876	Positive	14.026	341.329	Unknown	[M+H]+	null	null	null	null	367.44	0.012995	1.27495
1877	Positive	0.597	129.944	Unknown	[M+H]+	null	null	null	null	87.933	0.013012	1.38381
1878	Positive	1.039	220.928	Unknown	[M+H]+	null	null	null	null	0.49864	0.013012	1.07061
1879	Positive	1.057	576.961	Unknown	[M+H]+	null	null	null	null	15.306	0.013012	1.40336
1880	Positive	14.303	397.297	low score: Unknown (carbon number 27); PlaSMA ID-2179	[M+H]+	C27H40O2	Unknown	null	null	139.73	0.013012	1.2213
1881	Positive	14.168	247.184	low score: Sophocarpine	[M+H]+	C15H22N2O	Matrine alkaloids	AAGFPTSOPGCENQ-JLNYLFASSA-N	C1C[C@H]2CN3[C@H](CC=CC3=O)[C@@H]4[C@H]2N(C1)CCC4	48.66	0.013014	1.51274
1882	Positive	1.839	133.936	Unknown	[M+H]+	null	null	null	null	106.34	0.013015	1.50607
1883	Positive	18.411	223.079	no MS2: 2-methylanthra-9,10-quinone	[M+H+Na]2+	C15H10O2	Anthraquinones	NJWGQARXZDRHCD-UHFFFAOYSA-N	O=C1C=2C=CC=CC2C(=O)C3=CC(=CC=C13)C	14.222	0.013015	1.1749
1884	Positive	8.724	247.185	low score: sophocarpine	[M+H]+	C15H22N2O	Matrine alkaloids	AAGFPTSOPGCENQ-KYEXWDHISA-N	O=C1C=CCC2N1CC3CCCN4CCCC2C43	22.061	0.013015	1.46376
1885	Positive	8.617	454.362	Unknown	[M+H]+	null	null	null	null	8.1016	0.013038	0.917586
1886	Positive	13.951	124.097	HISTIDINOL	[M-H2O+H]+	C6H11N3O	Aralkylamines	ZQISRDCJNBUVMM-YFKPBYRVSA-N	N[C@H](CO)CC1=CN=CN1	6.2726	0.013039	1.56837
1887	Positive	0.062	223.078	no MS2: 2-methylanthra-9,10-quinone	[M+H]+	C15H10O2	Anthraquinones	NJWGQARXZDRHCD-UHFFFAOYSA-N	O=C1C=2C=CC=CC2C(=O)C3=CC(=CC=C13)C	11.001	0.013053	1.51394
1888	Positive	6.618	426.298	low score: Jervine	[M+H]+	C27H39NO3	Jerveratrum-type alkaloids	CLEXYFLHGFJONT-DNMILWOZSA-N	C[C@H]1C[C@@H]2[C@H]([C@H]([C@]3(O2)CC[C@H]4[C@@H]5CC=C6C[C@H](CC[C@@]6([C@H]5C(=O)C4=C3C)C)O)C)NC1	2.6247	0.013054	1.07312
1889	Positive	15.391	124.097	no MS2: HISTIDINOL	[M-H2O+H]+	C6H11N3O	Aralkylamines	ZQISRDCJNBUVMM-YFKPBYRVSA-N	N[C@H](CO)CC1=CN=CN1	4.5662	0.013062	1.58371
1890	Positive	6.342	311.229	low score: Unknown (carbon number 18); PlaSMA ID-1651	[M+H]+	C18H30O4	Unknown	null	null	2.9728	0.013062	1.3698
1891	Positive	0.432	298.877	Unknown	[M+H]+	null	null	null	null	82.639	0.013062	1.31415
1892	Positive	6.556	442.334	low score: "((4R)-4-((3R,5S,7R,9S,10S,13R,14S,17R)-3,7-dihydroxy-10,13-dimethylhexadecahydro-1H-cyclopenta[a]phenanthren-17-yl)-2,2-dimethylpentanoyl)glycine"	[M-2H2O+H]+	C28H47NO5	Glycinated bile acids and derivatives	HQPHGZUTNNVZLH-BOWXQMHNSA-N	[H][C@@]12[C@@H](O)C[C@@H]3C[C@H](O)CC[C@]3(C)[C@H]1CC[C@@]4(C)[C@H]2CC[C@@H]4[C@@H](CC(C)(C)C(NCC(O)=O)=O)C	8.0805	0.013065	1.36915
1893	Positive	1.037	604.831	Unknown	[M+H]+	null	null	null	null	25.635	0.013065	1.33912
1894	Positive	9.987	427.416	Unknown	[M+H]+	null	null	null	null	44.911	0.013065	1.14723
1895	Positive	8.08	452.313	low score: Chasmanine	[M+H]+	C25H41NO6	Aconitane-type diterpenoid alkaloids	DBODJJZRZFZBBD-XXYWQWTJSA-N	OC1C2CC3C1C(O)(CC2OC)C4C(OC)C5C6(COC)CN(CC)C4C35C(OC)CC6	7.0033	0.013065	1.11026
1896	Positive	1.064	442.967	Unknown	[M+H]+	null	null	null	null	3.0986	0.013085	1.04348
1897	Positive	13.719	124.096	no MS2: HISTIDINOL	[M-H2O+H]+	C6H11N3O	Aralkylamines	ZQISRDCJNBUVMM-YFKPBYRVSA-N	N[C@H](CO)CC1=CN=CN1	6.0558	0.013086	1.55047
1898	Positive	6.452	271.133	low score: Atractylenolide III	[M+Na]+	C15H20O3	Eudesmanolides, secoeudesmanolides, and derivatives	FBMORZZOJSDNRQ-GLQYFDAESA-N	O=C1OC2(O)C(=C1C)CC3C(=C)CCCC3(C)C2	4.8221	0.013086	0.907424
1899	Positive	0.426	114.965	Unknown	[M+H]+	null	null	null	null	120.07	0.013097	1.3504
1900	Positive	0.533	304.82	Unknown	[M+H]+	null	null	null	null	489.45	0.013097	1.5011
1901	Positive	12.814	512.544	Unknown	[M+H]+	null	null	null	null	144.79	0.013097	1.39875
1902	Positive	18.456	373.125	no MS2: NCGC00381050-01!7-(5,7-dimethoxy-4-oxochromen-2-yl)-6-hydroxyheptanoic acid [IIN-based on: CCMSLIB00000845870]	[M+Na]+	C18H22O7	Chromones	CRHUZHVITSVUHQ-UHFFFAOYSA-N	COC1=CC(OC)=C2C(=O)C=C(CC(O)CCCCC(O)=O)OC2=C1	92.548	0.013097	1.01235
1903	Positive	1.263	365.112	no MS2: Melibiose	[M+Na]+	C12H22O11	Fatty acyl glycosides of mono- and disaccharides	AYRXSINWFIIFAE-GFRRCQKTSA-N	O=CC(O)C(O)C(O)C(O)COC1OC(CO)C(O)C(O)C1O	19.97	0.013129	1.26147
1904	Positive	12.511	257.267	Unknown	[M+H]+	null	null	null	null	9.4375	0.013131	1.3808
1905	Positive	0.473	133.939	Unknown	[M+H]+	null	null	null	null	1019.1	0.013167	1.51242
1906	Positive	0.915	533.363	low score: Dehydroeburicoic acid monoacetate	[M+Na]+	C33H50O4	Triterpenoids	AYHCPTDPDUADTK-UHFFFAOYSA-N	O=C(OC1CCC2(C3=CCC4(C)C(CCC4(C3=CCC2C1(C)C)C)C(C(=O)O)CCC(=C)C(C)C)C)C	0.010751	0.013167	1.10031
1907	Positive	0.592	107.915	Unknown	[M+H]+	null	null	null	null	55.204	0.013182	1.40123
1908	Positive	1.273	239.035	low score: 4-methoxy-7H-furo[3,2-g]chromen-7-one	[M+Na]+	C12H8O4	5-methoxypsoralens	BGEBZHIAGXMEMV-UHFFFAOYSA-N	O=C1OC=2C=C3OC=CC3=C(OC)C2C=C1	91.348	0.013182	1.45348
1909	Positive	13.934	359.342	Unknown	[M+H]+	null	null	null	null	232.44	0.013182	1.31471
1910	Positive	6.596	463.281	low score: Methyl-mappain	[M+H]+	C30H38O4	Stilbenes	MRXGJOGASBBDTM-FVFOHYRDSA-N	C/C(C)=C\CC/C(C)=C/CC1=C(C(OC)=CC(/C=C/C2=CC(O)=C(C(O)=C2)C/C=C(C)\C)=C1)O	15.419	0.013182	1.1532
1911	Positive	12.197	824.622	Unknown	[M+H]+	null	null	null	null	8.1832	0.013186	1.24193
1912	Positive	6.096	319.159	low score: Zearalenone	[M+H]+	C18H22O5	Zearalenones	MBMQEIFVQACCCH-QBODLPLBSA-N	C[C@H]1CCCC(=O)CCC/C=C/C2=CC(=CC(=C2C(=O)O1)O)O	6.9963	0.013187	1.22482
1913	Positive	1.154	306.978	Unknown	[M+H]+	null	null	null	null	2.594	0.013211	1.17864
1914	Positive	8.986	604.446	low score: (1R,6R,10S,11R,13S,15R)-1,6-dihydroxy-8-(hydroxymethyl)-4,12,12,15-tetramethyl-5-oxotetracyclo[8.5.0.0?,?.0??,??]pentadeca-3,8-dien-13-yl hexadecanoate	[M+NH4]+	C36H58O6	Phorbol esters	QUVRUINWOFZNJL-QNMVXEMISA-N	O=C(OC12CC(C)C3(O)C(C=C(CO)CC4(O)C(=O)C(=CC43)C)C1C2(C)C)CCCCCCCCCCCCCCC	5.8487	0.013211	1.13487
1915	Positive	14.394	455.378	Unknown	[M+H]+	null	null	null	null	0.49273	0.013215	1.45367
1916	Positive	14.38	249.278	Unknown	[M+H]+	null	null	null	null	135.27	0.013215	1.24649
1917	Positive	6.441	444.347	Unknown	[M+H]+	null	null	null	null	10.748	0.013215	1.35611
1918	Positive	0.77	293.876	Unknown	[M+H]+	null	null	null	null	152.71	0.013255	1.45616
1919	Positive	6.334	223.17	low score: 3-Nor-3-Oxopanasinsan-6-Ol	[M+H]+	C14H22O2	Cyclic alcohols and derivatives	UHRWOVVMQAASAO-UHFFFAOYSA-N	O=C1CCC(O)C2(C)CCC3C(C)(C)CC132	2.0076	0.013258	1.25881
1920	Positive	6.346	384.25	low score: NCGC00380312-01_C24H35NO4_	[M-H2O+H]+	C24H35NO4	Isoindolones	NDJDZINMNBVVHS-UHFFFAOYSA-N	CC(C)CC1NC(=O)C23OC(=O)\C=C\CC(O)CCC(=C\C2\C=C(C)/C(C)C13)\C	3.623	0.013258	1.27824
1921	Negative	15.203	425.286	low score: Leupeptin	[M-H]-	C20H38N6O4	Dipeptides	GDBQQVLCIARPGH-UHFFFAOYSA-N	NC(=N)NCCC[C@@H](C=O)NC(=O)[C@H](CC(C)C)NC(=O)[C@H](CC(C)C)NC(C)=O	3.9473	0.013262	1.35896
1922	Positive	1.182	536.302	no MS2: "2-((4R)-4-((3R,5S,7S,9S,10S,13R,14S,17R)-3,7-dihydroxy-10,13-dimethylhexadecahydro-1H-cyclopenta[a]phenanthren-17-yl)-N-methylpentanamido)ethane-1-sulfonic acid"	[M+Na]+	C27H47NO6S	Taurinated bile acids and derivatives	CJLZGUJUXDRHJQ-WGWZZZELSA-N	C[C@H](CCC(N(C)CCS(=O)(O)=O)=O)[C@H]1CC[C@H]2[C@]([C@@H]3CC[C@@]21C)([H])[C@@H](O)C[C@@]4([H])[C@]3(C)CC[C@@H](O)C4	0.013535	0.013292	1.18082
1923	Positive	14.046	100.082	no MS2: 2-Piperidone; CE0; XUWHAWMETYGRKB-UHFFFAOYSA-N	[M+H]+	C5H9NO	Piperidinones	XUWHAWMETYGRKB-UHFFFAOYSA-N	C1CCN=C(C1)O	19.719	0.013304	1.46146
1924	Positive	1.137	436.852	Unknown	[M+H]+	null	null	null	null	4.7254	0.013304	1.06397
1925	Positive	14.38	358.223	no MS2: NCGC00347635-02![5-acetyloxy-3-(hydroxymethyl)-2-oxo-6-propan-2-ylcyclohex-3-en-1-yl] 3-methylpentanoate	[M+NH4]+	C18H28O6	Menthane monoterpenoids	MPXXSICHRNCHHK-UHFFFAOYSA-N	CCC(C)CC(=O)OC1C(C(C)C)C(OC(C)=O)C=C(CO)C1=O	19.186	0.013304	1.17992
1926	Positive	14.356	397.302	low score: Unknown (carbon number 27); PlaSMA ID-2179	[M+H]+	C27H40O2	Unknown	null	null	179.86	0.013304	1.17621
1927	Positive	7.139	264.252	Unknown	[M+H]+	null	null	null	null	130.48	0.013312	1.5147
1928	Positive	9.584	621.345	low score: NCGC00381318-01![3-methyl-1-[3-methyl-1-[3-methyl-1-oxo-1-(2,3,4,5,6-pentahydroxyhexoxy)pentan-2-yl]oxy-1-oxopentan-2-yl]oxy-1-oxopentan-2-yl] 2-hydroxy-3-methylpentanoate [IIN-based on: CCMSLIB00000845116]	[M-H2O+H]+	C30H54O14	Depsipeptides	XHFZCGJKWBSHAG-UHFFFAOYSA-N	CCC(C)C(O)C(=O)OC(C(C)CC)C(=O)OC(C(C)CC)C(=O)OC(C(C)CC)C(=O)OCC(O)C(O)C(O)C(O)CO	166.19	0.013321	1.14786
1929	Positive	0.64	262.873	Unknown	[M+H]+	null	null	null	null	110.29	0.013358	1.54988
1930	Positive	7.16	219.174	alpha-Cyperone	[M+H]+	C15H22O	Eudesmane, isoeudesmane or cycloeudesmane sesquiterpenoids	KUFXJZXMWHNCEH-UHFFFAOYSA-N	CC1=C2CC(CCC2(CCC1=O)C)C(=C)C	2.9796	0.013378	1.13266
1931	Positive	0.107	371.128	no MS2: 1-[2-hydroxy-4-(3-hydroxy-5-methylphenoxy)-6-methylphenyl]-3-methylbutane-2,3-diol	[M+K]+	C19H24O5	Diphenylethers	FLLRZSQAKUHACV-UHFFFAOYSA-N	OC=1C=C(OC2=CC(O)=C(C(=C2)C)CC(O)C(O)(C)C)C=C(C1)C	31.878	0.013413	1.484
1932	Positive	10.296	385.372	Unknown	[M+H]+	null	null	null	null	4.0805	0.01342	0.824385
1933	Positive	0.058	299.105	no MS2: Amlexanox	[M+H]+	C16H14N2O4	Chromeno[2,3-b]pyridine-5-ones	SGRYPYWGNKJSDL-UHFFFAOYSA-N	O=C(O)C1=CC=2C(=O)C3=CC(=CC=C3OC2N=C1N)C(C)C	2.839	0.013457	1.46327
1934	Positive	9.121	702.293	no MS2: NCGC00380355-01!(7E,13E)-9,15-dihydroxy-4,10,16-trimethyl-1,5,11-trioxacyclohexadeca-7,13-diene-2,6,12-trione [IIN-based on: CCMSLIB00000848983]	[2M+NH4]+	C16H22O8	Macrolides and analogues	MJMMUATWVTYSFD-YDFGWWAZSA-N	CC1CC(=O)OC(C)C(O)\\C=C\\C(=O)OC(C)C(O)\\C=C\\C(=O)O1	21.334	0.013457	1.11867
1935	Positive	0.352	171.113	Unknown (carbon number 13); PlaSMA ID-399	[M+H]+	C13H14	Unknown	null	null	33.374	0.013481	1.3465
1936	Positive	1.045	718.848	Unknown	[M+H]+	null	null	null	null	22.186	0.013481	1.38218
1937	Positive	0.462	174.969	Unknown	[M+H]+	null	null	null	null	110.56	0.013482	1.491
1938	Positive	0.039	259.224	Unknown	[M+H]+	null	null	null	null	3.1671	0.013482	1.30589
1939	Positive	1.193	736.185	no MS2: NCGC00380524-01!(2R)-2-[(E)-3-[3-[(1R)-1-carboxy-2-(3,4-dihydroxyphenyl)ethoxy]carbonyl-2-(3,4-dihydroxyphenyl)-7-hydroxy-2,3-dihydro-1-benzofuran-4-yl]prop-2-enoyl]oxy-3-(3,4-dihydroxyphenyl)propanoic acid	[M+NH4]+	C36H30O16	2-arylbenzofuran flavonoids	SNKFFCBZYFGCQN-FTNWOIIGSA-N	OC(=O)[C@@H](CC1=CC=C(O)C(O)=C1)OC(=O)\C=C\C2=CC=C(O)C3=C2C(C(O3)C4=CC=C(O)C(O)=C4)C(=O)O[C@H](CC5=CC(O)=C(O)C=C5)C(O)=O	0.018355	0.013482	1.10295
1940	Positive	6.369	287.168	low score: (1S,2R,9R,10S,12S)-12-hydroxy-7,15-diazatetracyclo[7.7.1.0^{2,7}.0^{10,15}]heptadecan-6-one	[M+Na]+	C15H24N2O2	Sparteine, lupanine, and related alkaloids	JVYKIBAJVKEZSQ-VJTDZRGJSA-N	O=C1N2CC3CC(CN4CCC(O)CC43)C2CCC1	5.0164	0.01349	1.05079
1941	Positive	15.092	522.634	Unknown	[M+H]+	null	null	null	null	9.7708	0.01351	1.12413
1942	Positive	0.459	112.956	Unknown	[M+H]+	null	null	null	null	64.409	0.013515	1.37674
1943	Positive	15.523	124.096	HISTIDINOL	[M-H2O+H]+	C6H11N3O	Aralkylamines	ZQISRDCJNBUVMM-YFKPBYRVSA-N	N[C@H](CO)CC1=CN=CN1	6.5862	0.013515	1.52074
1944	Positive	5.816	194.118	low score: Isoprocarb	[M+H]+	C11H15NO2	Cumenes	QBSJMKIUCUGGNG-UHFFFAOYSA-N	CNC(=O)OC1=C(C=CC=C1)C(C)C	2.6944	0.013515	0.971439
1945	Positive	0.662	278.82	Unknown	[M+H]+	null	null	null	null	119.92	0.013515	1.50031
1946	Positive	0.054	453.336	no MS2: NCGC00169801-02_C30H46O4_Lanosta-8,24-dien-26-oic acid, 21-hydroxy-3-oxo-, (5xi,13alpha,14beta,17alpha,20S,24E)-	[M-H2O+H]+	C30H46O4	Triterpenoids	RLTDMRMWVUCOAI-BOVQQMIFSA-N	C\C(=C/CC[C@H](CO)[C@@H]1CC[C@]2(C)\C3=C(/CC[C@@]12C)[C@@]4(C)CCC(=O)C(C)(C)C4CC3)C(O)=O	7.53	0.013515	1.26075
1947	Positive	18.388	371.128	no MS2: 1-[2-hydroxy-4-(3-hydroxy-5-methylphenoxy)-6-methylphenyl]-3-methylbutane-2,3-diol	[M+K]+	C19H24O5	Diphenylethers	FLLRZSQAKUHACV-UHFFFAOYSA-N	OC=1C=C(OC2=CC(O)=C(C(=C2)C)CC(O)C(O)(C)C)C=C(C1)C	105.27	0.013515	1.04903
1948	Positive	8.54	634.264	Unknown	[M+H]+	null	null	null	null	58.891	0.013515	0.974934
1949	Positive	13.59	247.185	no MS2: Milnacipran	[M+H]+	C15H22N2O	Phenylacetamides	GJJFMKBJSRMPLA-HIFRSBDPSA-N	O=C(N(CC)CC)C1(C=2C=CC=CC2)CC1CN	55.877	0.013522	1.58868
1950	Positive	6.13	349.209	low score: Bexarotene	[M+2Na-H]+	C24H28O2	Retinoids	NAVMQTYZDKMPEU-UHFFFAOYSA-N	CC1=CC2=C(C=C1C(=C)C3=CC=C(C=C3)C(=O)O)C(CCC2(C)C)(C)C	27.842	0.013522	1.24746
1951	Positive	8.527	522.292	low score: Carmaphycin A enone analogue	[M+Na]+	C25H45N3O5S	Dipeptides	NHLBOKNHQIEJIH-IWHCYLEESA-N	CC(C([C@H](CC(C)C)NC([C@H](CCS(C)=O)NC([C@H](C(C)C)NC(CCCCC)=O)=O)=O)=O)=C	6.7158	0.013551	0.941646
1952	Positive	12.355	686.486	Unknown	[M+H]+	null	null	null	null	4.6837	0.013555	1.08092
1953	Positive	0.449	141.959	Unknown	[M+H]+	null	null	null	null	52.431	0.013555	1.43371
1954	Positive	6.459	458.329	low score: Threonine conjugated chenodeoxycholic acid	[M-2H2O+H]+	C28H47NO6	Glycinated bile acids and derivatives	FDLBWFQZCBIUPV-JPWRXKRQSA-N	C[C@H](CCC(N[C@@H]([C@@H](C)O)C(O)=O)=O)[C@H]1CC[C@@]2([H])[C@]3([H])[C@H](O)C[C@]4([H])C[C@H](O)CC[C@]4(C)[C@H]3CC[C@@]21C	5.2978	0.013568	1.35258
1955	Positive	0.607	298.852	Unknown	[M+H]+	null	null	null	null	87.227	0.013568	1.33747
1956	Positive	0.43	117.968	Unknown	[M+H]+	null	null	null	null	114.88	0.013574	1.4749
1957	Positive	0.674	339.163	low score: Bergamottin	[M+H]+	C21H22O4	Terpene lactones	DBMJZOMNXBSRED-OQLLNIDSSA-N	O=C1OC=2C=C3OC=CC3=C(OCC=C(C)CCC=C(C)C)C2C=C1	20.131	0.013597	1.27614
1958	Positive	6.546	449.268	low score: Mappain	[M+2Na-H]+	C29H36O4	Stilbenes	GJZKDVGLDGLPMB-ZVBRSKEYSA-N	OC=1C=C(C=CC2=CC(O)=C(C(O)=C2)CC=C(C)C)C=C(C1O)CC=C(C)CCC=C(C)C	12.585	0.013601	1.17421
1959	Positive	13.648	444.412	no MS2: (1R,3aR,5aR,5bR,9S,11aR)-3a,5a,5b,8,8,11a-hexamethyl-1-prop-1-en-2-yl-1,2,3,4,5,6,7,7a,9,10,11,11b,12,13,13a,13b-hexadecahydrocyclopenta[a]chrysen-9-ol	[M+NH4]+	C30H50O	Triterpenoids	MQYXUWHLBZFQQO-KIIHVYTKSA-N	OC1CCC2(C)C(CCC3(C)C2CCC4C5C(C(=C)C)CCC5(C)CCC43C)C1(C)C	5.1223	0.013601	1.08769
1960	Positive	9.884	652.468	Unknown	[M+H]+	null	null	null	null	4.3688	0.013601	1.00496
1961	Positive	10.487	616.31	low score: Hypaconitine	[M+H]+	C33H45NO10	Aconitane-type diterpenoid alkaloids	FIDOCHXHMJHKRW-ILSCITHTSA-N	O=C(OC1C2C3CC1(O)C(OC)C(O)C2(OC(=O)C)C4C(OC)C5C6(COC)CN(C)C4C35C(OC)CC6)C=7C=CC=CC7	237.62	0.013622	1.47151
1962	Positive	6.473	443.285	low score: (1S,4S,5R,9S,10R,13R,14R)-14-hydroxy-5,9-dimethyl-14-{[(3-methylbutanoyl)oxy]methyl}tetracyclo[11.2.1.0?,??.0?,?]hexadecane-5-carboxylic acid	[M+Na]+	C25H40O5	Kaurane diterpenoids	FIOZUJXSEZUYCS-MTSAZYMTSA-N	O=C(OCC1(O)CC23CCC4C(C(=O)O)(C)CCCC4(C)C3CCC1C2)CC(C)C	7.538	0.013629	1.18267
1963	Negative	1.155	837.114	Unknown	[M-H]-	null	null	null	null	0.20338	0.013638	0.997107
1964	Positive	14.179	100.084	no MS2: 2-Piperidone; CE0; XUWHAWMETYGRKB-UHFFFAOYSA-N	[M+H]+	C5H9NO	Piperidinones	XUWHAWMETYGRKB-UHFFFAOYSA-N	C1CCN=C(C1)O	18.414	0.01365	1.46372
1965	Positive	6.08	328.257	low score: Unknown (carbon number 17); PlaSMA ID-1772	[M+H]+	C17H33N3OS	Unknown	null	null	8.8091	0.01365	1.44601
1966	Positive	14.303	461.271	low score: MMV676602	[M+H]+	C25H32N8O	Phenylpiperazines	RXZMYLDMFYNEIM-UHFFFAOYSA-N	OC(=NC)C1=NN(C=2C=3N=C(N=CC3CC(C12)(C)C)NC4=CC=C(C=C4)N5CCN(C)CC5)C	95.078	0.013688	1.42205
1967	Positive	18.411	355.095	no MS2: [1-hydroxy-1-(4-methoxyphenyl)propan-2-yl] 4-methoxybenzoate	[M+K]+	C18H20O5	P-methoxybenzoic acids and derivatives	MHJLKHNHGMUAPQ-UHFFFAOYSA-N	O=C(OC(C)C(O)C1=CC=C(OC)C=C1)C2=CC=C(OC)C=C2	70.878	0.013688	1.01946
1968	Positive	13.515	171.112	no MS2: Levetiracetam	[M+2Na]2+	C8H14N2O2	Alpha amino acids and derivatives	HPHUVLMMVZITSG-LURJTMIESA-N	O=C1N(CCC1)C(C(=N)O)CC	30.2	0.013699	1.31461
1969	Positive	1.195	616.987	Unknown	[M+H]+	null	null	null	null	7.1245	0.013699	1.17057
1970	Positive	11.655	263.254	Unknown	[M+H]+	null	null	null	null	30.264	0.013702	1.25675
1971	Positive	8.238	268.283	Unknown	[M+H]+	null	null	null	null	43.007	0.013702	1.27781
1972	Positive	17.949	223.08	no MS2: 2-methylanthra-9,10-quinone	[M+H]+	C15H10O2	Anthraquinones	NJWGQARXZDRHCD-UHFFFAOYSA-N	O=C1C=2C=CC=CC2C(=O)C3=CC(=CC=C13)C	10.771	0.01372	1.38858
1973	Positive	0.584	276.824	Unknown	[M+H]+	null	null	null	null	199.26	0.01372	1.42811
1974	Positive	10.494	606.352	Unknown	[M+H]+	null	null	null	null	50.127	0.013749	1.34627
1975	Positive	0.436	264.871	Unknown	[M+H]+	null	null	null	null	6.1652	0.013755	1.11893
1976	Positive	6.135	327.225	low score: 14-(hydroxymethyl)-5,9-dimethyltetracyclo[11.2.1.0?,??.0?,?]hexadecane-5-carbaldehyde	[M+Na]+	C20H32O2	Kaurane diterpenoids	ACXLVKYMISNUFD-UHFFFAOYSA-N	O=CC1(C)CCCC2(C)C1CCC34CC(CO)C(CCC32)C4	3.5314	0.013775	1.35415
1977	Positive	13.687	371.128	low score: Ajugol	[M+Na]+	C15H24O9	Iridoid O-glycosides	VELYAQRXBJLJAK-XKKWFBPMSA-N	OCC1OC(OC2OC=CC3C(O)CC(O)(C)C23)C(O)C(O)C1O	31.204	0.013801	1.36135
1978	Positive	0.838	273.184	no MS2: h_92_oxabolone	[M-H2O+H]+	C18H26O3	Estrogens and derivatives	GXHBCWCMYVTJOW-DNBWYCQVSA-N	O[C@H]1CCC2C3CCC4=C(O)C(CCC4C3CC[C@@]21C)=O	11.449	0.013849	0.848079
1979	Positive	1.7	133.935	Unknown	[M+H]+	null	null	null	null	114.77	0.013849	1.45042
1980	Positive	14.365	371.129	no MS2: 1-[2-hydroxy-4-(3-hydroxy-5-methylphenoxy)-6-methylphenyl]-3-methylbutane-2,3-diol	[M+K]+	C19H24O5	Diphenylethers	FLLRZSQAKUHACV-UHFFFAOYSA-N	OC=1C=C(OC2=CC(O)=C(C(=C2)C)CC(O)C(O)(C)C)C=C(C1)C	32.733	0.013849	1.33804
1981	Positive	10.762	303.275	low score: h_58_bolasterone-m	[M+H-H2O]+	C21H36O2	Androgens and derivatives	ZWQUPIDNCOVROC-HEEAJRSSSA-N	C[C@]1(O)CC[C@@H]2[C@]1(C)CC[C@H]3[C@H]2[C@H](C)C[C@@]4([H])[C@]3(C)CC[C@@H](O)C4	3.3941	0.013849	1.20558
1982	Positive	12.461	397.409	Unknown	[M+H]+	null	null	null	null	0.49356	0.013849	1.23466
1983	Positive	6.503	502.317	low score: Serine conjugated chenodeoxycholic acid	[M+Na]+	C27H45NO6	Glycinated bile acids and derivatives	MIGXYHMLYVAUQT-DYUDRYMLSA-N	C[C@H](CCC(N[C@@H](CO)C(O)=O)=O)[C@H]1CC[C@@]2([H])[C@]3([H])[C@H](O)C[C@]4([H])C[C@H](O)CC[C@]4(C)[C@H]3CC[C@@]21C	3.2272	0.013849	1.13617
1984	Positive	10.153	555.336	no MS2: NCGC00168955-03![3-hydroxy-1-oxo-1-(2,3,4,5,6-pentahydroxyhexoxy)decan-5-yl] 3,5-dihydroxydecanoate	[M+H]+	C26H50O12	Fatty alcohols	JPGYRFJJNVYGPI-UHFFFAOYSA-N	CCCCCC(O)CC(O)CC(=O)OC(CCCCC)CC(O)CC(=O)OCC(O)C(O)C(O)C(O)CO	19.702	0.013849	0.986239
1985	Positive	8.862	124.094	low score: HISTIDINOL	[M-H2O+H]+	C6H11N3O	Aralkylamines	ZQISRDCJNBUVMM-YFKPBYRVSA-N	N[C@H](CO)CC1=CN=CN1	2.4688	0.013862	1.34587
1986	Positive	0.745	267.851	Unknown	[M+H]+	null	null	null	null	113.54	0.013862	1.39584
1987	Positive	0.642	221.17	no MS2: Prilocaine	[M+H]+	C13H20N2O	Alpha amino acid amides	MVFGUOIZUNYYSO-UHFFFAOYSA-N	C1=CC=CC(=C1C)NC(C(NCCC)C)=O	2.62	0.013919	1.49028
1988	Positive	19.021	776.287	low score: methyl (2S,3R,4S)-3-ethenyl-4-[(Z)-3-[(2S,3R,4R)-3-ethenyl-5-methoxycarbonyl-2-[(2S,3R,4S,5S,6R)-3,4,5-trihydroxy-6-(hydroxymethyl)oxan-2-yl]oxy-3,4-dihydro-2H-pyran-4-yl]-4-oxobut-2-enyl]-2-[(2S,3R,4S,5S,6R)-3,4,5-trihydroxy-6-(hydroxymethyl)oxan-2-yl]oxy-3,4-dihydro-2H-pyran-5-carboxylate	[M+NH4]+	C34H46O19	Terpene glycosides	MWLKXILGJPSPKZ-LWSBBEHMSA-N	O=CC(=CCC1C(=COC(OC2OC(CO)C(O)C(O)C2O)C1C=C)C(=O)OC)C3C(=COC(OC4OC(CO)C(O)C(O)C4O)C3C=C)C(=O)OC	63.612	0.013928	1.42049
1989	Positive	1.181	678.222	Unknown	[M+H]+	null	null	null	null	0.011965	0.01396	1.16475
1990	Positive	13.723	247.184	no MS2: Milnacipran	[M+H]+	C15H22N2O	Phenylacetamides	GJJFMKBJSRMPLA-HIFRSBDPSA-N	O=C(N(CC)CC)C1(C=2C=CC=CC2)CC1CN	60.589	0.013962	1.53339
1991	Positive	0.444	260.877	Unknown	[M+H]+	null	null	null	null	16.007	0.013962	1.2379
1992	Positive	0.744	262.874	Unknown	[M+H]+	null	null	null	null	71.743	0.013973	1.46418
1993	Positive	13.601	297.26	no MS2: 2-(N-butylpropionamido)-N-cyclohexylbutanamide	[M+H]+	C17H32N2O2	Tertiary carboxylic acid amides	QMXGNDITXNMQEK-UHFFFAOYSA-N	CCCCN(C(=O)CC)C(CC)C(=O)NC1CCCCC1	16.401	0.014002	1.28201
1994	Positive	0.781	110.92	Unknown	[M+H]+	null	null	null	null	60.111	0.014006	1.363
1995	Positive	10.367	427.419	Unknown	[M+H]+	null	null	null	null	49.89	0.014006	1.07223
1996	Positive	0.554	131.939	Unknown	[M+H]+	null	null	null	null	1688.2	0.01405	1.47796
1997	Positive	6.078	365.205	low score: NCGC00169660-02_C22H30O3_2-Hydroxy-6-[(8Z,11Z)-8,11,14-pentadecatrien-1-yl]benzoic acid	[M+Na]+	C22H30O3	Salicylic acids	QUVGEKPNSCFQIR-UTOQUPLUSA-N	OC(=O)C1=C(CCCCCCC\C=C/C/C=C\CC=C)C=CC=C1O	7.6096	0.01405	0.993754
1998	Positive	0.728	117.943	Unknown	[M+H]+	null	null	null	null	63.76	0.014056	1.49713
[truncated: 1,015 more rows]
