# Supplementary material
Source: Research Square preprint supplement (doi:10.21203/rs.3.rs-9323973/v1)
Supplement: Supplementary file 2 [file 840e6e97e9fec7bf7f12176a.xlsx]

## Sheet: Sheet1
Supplementary table S1 Serum metabolomic data from control and RABV-infected mice.
Alignment ID	Ionization mode	Average Rt(min)	Average Mz	Metabolite name	Adduct type	Reference m/z	Formula	Ontology	INCHIKEY	SMILES	No infection 1-1	No infection 1-2	No infection 2-1	No infection 2-2	No infection 3-1	No infection 3-2	No infection 4-1	No infection 4-2	No infection 5-1	No infection 5-2	No infection 6-1	No infection 6-2	Early infection 1-1	Early infection 1-2	Early infection 2-1	Early infection 2-2	Earlyinfection 3-1	Earlyinfection 3-2	Earlyinfection 4-1	Earlyinfection 4-2	Earlyinfection 5-1	Earlyinfection 5-2	Earlyinfection 6-1	Earlyinfection 6-2	Lateinfection 1-1	Lateinfection 1-2	Lateinfection 2-1	Lateinfection 2-2	Lateinfection 3-1	Lateinfection 3-2	Lateinfection 4-1	Lateinfection 4-2	Lateinfection 5-1	Lateinfection 5-2	Lateinfection 6-1	Lateinfection 6-2	Clinicalinfection 1-1	Clinicalinfection 1-2	Clinicalinfection 2-1
1	Positive	2.257	100.07540	N-Methyl-2-pyrrolidone	[M+H]+	100.07569	C5H9NO	N-alkylpyrrolidines	SECXISVLQFMRJM-UHFFFAOYSA-N	CN1CCCC1=O	421	516	395	364	362	428	550	446	563	584	487	596	1017	816	5903	1897	13653	12988	17207	16744	17460	15735	16849	17056	409	351	901	896	1023	967	8743	11817	17745	17114	15642	15180	2023	2737	13805
2	Positive	14.046	100.08231	no MS2: 2-Piperidone; CE0; XUWHAWMETYGRKB-UHFFFAOYSA-N	[M+H]+	100.07570	C5H9NO	Piperidinones	XUWHAWMETYGRKB-UHFFFAOYSA-N	C1CCN=C(C1)O	791	890	1017	969	1026	1023	1105	1087	1114	816	969	990	1207	1271	2397	2798	39994	51586	64012	66733	65871	65085	65513	64212	1182	931	1054	1295	1159	1043	20070	27174	62499	58744	66478	66425	3568	1904	49458
3	Positive	1.638	100.08265	N-Methyl-2-pyrrolidone	[M+H]+	100.07569	C5H9NO	N-alkylpyrrolidines	SECXISVLQFMRJM-UHFFFAOYSA-N	CN1CCCC1=O	1401	1276	1347	1365	1298	1226	1452	1212	1570	1561	1566	1532	1830	1658	1982	2660	31063	30754	38102	37619	41686	37764	38349	37773	1462	1184	1805	1534	1628	1677	13575	26496	39127	35405	39195	40025	2560	3087	35312
4	Positive	10.617	100.08266	N-Methyl-2-pyrrolidone	[M+H]+	100.07569	C5H9NO	N-alkylpyrrolidines	SECXISVLQFMRJM-UHFFFAOYSA-N	CN1CCCC1=O	1033	1087	1015	840	852	1314	1210	1157	911	1129	1180	1006	1507	1155	2633	3226	33480	38360	40086	43421	48082	41014	41892	43248	1268	1040	1175	1051	1224	1143	28573	30548	42194	41881	41299	46810	3731	4049	36744
5	Positive	9.622	100.08270	N-Methyl-2-pyrrolidone	[M+H]+	100.07569	C5H9NO	N-alkylpyrrolidines	SECXISVLQFMRJM-UHFFFAOYSA-N	CN1CCCC1=O	1066	987	743	917	847	1060	1000	1210	1004	1382	1207	1490	1280	1124	2935	3528	33976	34942	39443	39289	43710	42434	42099	42795	1216	975	1279	947	1147	1470	27906	30606	39729	41086	41623	45677	3964	4198	38056
6	Positive	11.062	100.08276	N-Methyl-2-pyrrolidone	[M+H]+	100.07569	C5H9NO	N-alkylpyrrolidines	SECXISVLQFMRJM-UHFFFAOYSA-N	CN1CCCC1=O	921	944	1020	931	850	1119	1040	953	945	1161	1008	923	1437	1109	2450	3187	34598	37516	41919	42995	44428	43527	46547	45485	1402	1249	811	1124	1342	1202	28525	31875	41289	43688	44179	46376	3604	3985	37815
7	Positive	0.551	100.08294	N-Methyl-2-pyrrolidone	[M+H]+	100.07569	C5H9NO	N-alkylpyrrolidines	SECXISVLQFMRJM-UHFFFAOYSA-N	CN1CCCC1=O	1601	1286	1660	1276	1313	1278	1465	1379	1322	1733	1501	1632	1846	1925	1782	2605	24452	30840	32685	31874	36130	34395	33854	34782	1414	1494	1959	1525	1654	1808	14277	23592	33429	32024	34799	36263	2557	2700	30574
8	Positive	9.382	100.08294	N-Methyl-2-pyrrolidone	[M+H]+	100.07569	C5H9NO	N-alkylpyrrolidines	SECXISVLQFMRJM-UHFFFAOYSA-N	CN1CCCC1=O	630	1038	1156	1026	835	1325	1497	920	1415	1212	1339	1371	1731	1157	2675	3143	33481	33211	38922	36270	45131	46686	44721	44200	986	886	1262	1020	744	1277	19746	32460	34776	36971	42021	46033	3688	3876	36699
9	Positive	14.921	100.08296	no MS2: 2-Piperidone; CE0; XUWHAWMETYGRKB-UHFFFAOYSA-N	[M+H]+	100.07570	C5H9NO	Piperidinones	XUWHAWMETYGRKB-UHFFFAOYSA-N	C1CCN=C(C1)O	1063	867	1037	890	966	956	1158	1074	1113	1059	1020	994	1129	1267	2630	2984	31916	41638	50203	49266	49736	51094	55810	53742	1074	1010	1340	1538	1255	1186	20502	24750	46579	45832	53652	51481	3778	2301	38627
10	Positive	6.360	100.08297	no MS2: 2-Piperidone; CE0; XUWHAWMETYGRKB-UHFFFAOYSA-N	[M+H]+	100.07570	C5H9NO	Piperidinones	XUWHAWMETYGRKB-UHFFFAOYSA-N	C1CCN=C(C1)O	1222	1281	1449	1480	1495	1180	1202	1341	1406	1471	1287	1346	1507	1835	2424	2876	29504	31894	35618	33509	38678	36679	34948	33516	1872	1492	1659	1645	1604	1711	23495	29124	33069	32626	35171	33352	2616	2908	32535
11	Positive	9.286	100.08308	N-Methyl-2-pyrrolidone	[M+H]+	100.07569	C5H9NO	N-alkylpyrrolidines	SECXISVLQFMRJM-UHFFFAOYSA-N	CN1CCCC1=O	1061	793	784	736	987	917	628	687	613	1212	1107	1499	1015	1254	2675	3396	33687	35974	38432	42154	42982	40743	44721	41433	1018	732	1018	1020	1127	1277	27599	30077	38857	39683	40934	46480	3624	3624	36814
12	Positive	0.085	100.08308	no MS2: 2-Piperidone; CE0; XUWHAWMETYGRKB-UHFFFAOYSA-N	[M+H]+	100.07570	C5H9NO	Piperidinones	XUWHAWMETYGRKB-UHFFFAOYSA-N	C1CCN=C(C1)O	1173	1141	1211	1069	990	961	887	986	914	1071	1134	1035	1332	1613	1775	2460	22170	24094	29414	28302	30898	30063	30786	30298	1166	1014	1430	1190	1344	1376	15256	16792	27024	29346	31531	32894	2091	3794	25427
13	Positive	10.247	100.08315	no MS2: 2-Piperidone; CE0; XUWHAWMETYGRKB-UHFFFAOYSA-N	[M+H]+	100.07570	C5H9NO	Piperidinones	XUWHAWMETYGRKB-UHFFFAOYSA-N	C1CCN=C(C1)O	1010	1018	844	884	989	1257	1178	1019	1025	1261	1094	1185	1359	1213	2424	3398	34172	37551	41077	40542	43402	43087	42608	43337	1331	1132	945	1230	1189	1317	27006	31825	39844	42749	43097	45681	3345	3943	37397
14	Positive	8.721	100.08317	N-Methyl-2-pyrrolidone	[M+H]+	100.07569	C5H9NO	N-alkylpyrrolidines	SECXISVLQFMRJM-UHFFFAOYSA-N	CN1CCCC1=O	667	960	1248	1139	1014	1051	969	1256	1111	1517	1277	1547	1034	1240	2766	3145	34622	35871	40817	42328	41980	42038	40455	43106	1304	783	1366	997	867	1614	26353	34805	39110	38656	39580	45775	3570	3600	37754
15	Positive	7.143	100.08321	no MS2: 2-Piperidone; CE0; XUWHAWMETYGRKB-UHFFFAOYSA-N	[M+H]+	100.07570	C5H9NO	Piperidinones	XUWHAWMETYGRKB-UHFFFAOYSA-N	C1CCN=C(C1)O	1213	1177	1350	1300	1335	978	1238	1143	1196	1190	1267	1551	1425	1611	2820	3203	37634	38452	39029	38364	43716	40701	43502	40129	1538	1162	1774	1571	1404	1393	28140	31438	40399	38988	43805	42381	3388	3822	37839
16	Positive	8.871	100.08325	N-Methyl-2-pyrrolidone	[M+H]+	100.07569	C5H9NO	N-alkylpyrrolidines	SECXISVLQFMRJM-UHFFFAOYSA-N	CN1CCCC1=O	1144	870	978	1126	1004	1035	876	1256	1333	1176	1416	1394	1441	1253	2766	3210	34622	37968	40817	39654	41980	40898	41402	40844	1348	1035	1190	1482	1063	1381	26751	29933	39217	40732	41376	45080	3218	3224	32848
17	Positive	13.089	100.08327	no MS2: 2-Piperidone; CE0; XUWHAWMETYGRKB-UHFFFAOYSA-N	[M+H]+	100.07570	C5H9NO	Piperidinones	XUWHAWMETYGRKB-UHFFFAOYSA-N	C1CCN=C(C1)O	995	1063	850	1018	870	905	1133	1143	1027	880	1004	868	1326	1137	1915	2892	42452	47482	55653	61768	58763	55678	60234	58379	1063	927	1119	1342	1177	1103	20523	31863	54070	56280	58434	62292	3299	2043	48444
18	Positive	6.907	100.08329	no MS2: 2-Piperidone; CE0; XUWHAWMETYGRKB-UHFFFAOYSA-N	[M+H]+	100.07570	C5H9NO	Piperidinones	XUWHAWMETYGRKB-UHFFFAOYSA-N	C1CCN=C(C1)O	1246	1219	1477	1432	1414	1155	1258	1195	1377	1380	1304	1491	1384	1675	2040	2989	35533	37768	37286	37111	40739	39203	40736	36678	1715	1411	1627	1735	1498	1712	26492	29994	38573	38028	42666	42199	2736	3193	35470
19	Positive	1.740	100.08332	N-Methyl-2-pyrrolidone	[M+H]+	100.07569	C5H9NO	N-alkylpyrrolidines	SECXISVLQFMRJM-UHFFFAOYSA-N	CN1CCCC1=O	1573	1326	1326	1499	1207	1532	1578	1277	1570	1561	1491	1555	1997	1532	1825	2639	31739	33198	38729	36098	41995	36885	39019	40121	1544	1528	1755	1471	1532	1769	13575	26973	37594	35829	39195	40724	2267	3087	35456
20	Positive	14.377	100.08344	no MS2: 2-Piperidone; CE0; XUWHAWMETYGRKB-UHFFFAOYSA-N	[M+H]+	100.07570	C5H9NO	Piperidinones	XUWHAWMETYGRKB-UHFFFAOYSA-N	C1CCN=C(C1)O	1084	910	1030	916	1114	948	1227	1193	1180	879	1212	968	1138	1202	1995	2850	38776	50057	60555	60919	59769	59941	64287	62942	1231	1109	1270	1379	1231	1251	18842	26570	61561	56503	63337	63423	3475	1864	47646
21	Positive	14.747	100.08352	no MS2: 2-Piperidone; CE0; XUWHAWMETYGRKB-UHFFFAOYSA-N	[M+H]+	100.07570	C5H9NO	Piperidinones	XUWHAWMETYGRKB-UHFFFAOYSA-N	C1CCN=C(C1)O	1015	859	1137	1020	1162	1020	1187	1072	1143	1048	1124	996	1178	1238	2913	3342	35303	43252	50016	56412	50880	55444	58717	54861	1198	1027	1246	1378	1142	1278	21559	25047	53426	49913	58324	55127	3514	2178	42292
22	Positive	14.179	100.08354	no MS2: 2-Piperidone; CE0; XUWHAWMETYGRKB-UHFFFAOYSA-N	[M+H]+	100.07570	C5H9NO	Piperidinones	XUWHAWMETYGRKB-UHFFFAOYSA-N	C1CCN=C(C1)O	986	1038	1090	971	1087	1108	1165	1122	1162	945	1174	956	1166	1198	2405	2698	40646	51634	61932	67116	63841	63285	66890	64164	1272	973	1147	1335	1222	1116	20740	26874	61073	59258	68121	66774	3250	1874	47186
23	Positive	0.661	100.08360	no MS2: 2-Piperidone; CE0; XUWHAWMETYGRKB-UHFFFAOYSA-N	[M+H]+	100.07570	C5H9NO	Piperidinones	XUWHAWMETYGRKB-UHFFFAOYSA-N	C1CCN=C(C1)O	1687	1422	1680	1276	1365	1377	1528	1541	1354	1820	1831	1841	1844	1933	1737	2166	24336	28459	31595	32434	32991	33317	32499	34247	1434	1529	2031	1722	1665	1863	14299	22701	33514	32152	34789	34368	1817	1969	30568
24	Positive	7.446	100.08363	no MS2: 2-Piperidone; CE0; XUWHAWMETYGRKB-UHFFFAOYSA-N	[M+H]+	100.07570	C5H9NO	Piperidinones	XUWHAWMETYGRKB-UHFFFAOYSA-N	C1CCN=C(C1)O	1375	1176	1442	1354	1261	1072	1183	1268	1285	1598	1337	1307	1375	1771	2631	3361	36622	40128	39452	40563	43413	42330	43598	41154	1257	1191	1839	1547	1245	1545	28126	33566	41586	42018	43815	43472	3605	3811	37955
25	Positive	7.244	100.08365	no MS2: 2-Piperidone; CE0; XUWHAWMETYGRKB-UHFFFAOYSA-N	[M+H]+	100.07570	C5H9NO	Piperidinones	XUWHAWMETYGRKB-UHFFFAOYSA-N	C1CCN=C(C1)O	1267	1209	1405	1360	1267	1139	1260	1183	1270	1303	1246	1141	1441	1611	2770	3059	35829	38449	36142	38364	43716	43302	43355	40129	1431	1373	1774	1571	1430	1664	28491	31389	41608	41551	43866	42381	3342	3622	37839
26	Positive	9.170	100.08397	N-Methyl-2-pyrrolidone	[M+H]+	100.07569	C5H9NO	N-alkylpyrrolidines	SECXISVLQFMRJM-UHFFFAOYSA-N	CN1CCCC1=O	895	912	1092	1060	1060	1240	1281	930	967	1442	1146	1563	1316	1302	2398	3204	32442	35743	39019	43065	43790	41215	41044	41700	1165	1154	1658	1013	1147	1435	26502	30717	39764	39336	37698	44097	3589	3486	37909
27	Positive	13.386	100.08398	no MS2: 2-Piperidone; CE0; XUWHAWMETYGRKB-UHFFFAOYSA-N	[M+H]+	100.07570	C5H9NO	Piperidinones	XUWHAWMETYGRKB-UHFFFAOYSA-N	C1CCN=C(C1)O	933	821	900	1058	945	1034	1145	876	1116	947	1119	962	1339	1107	2624	2958	43586	50499	61827	65350	63912	62652	65793	65796	1113	1072	1126	1338	1071	1186	20516	30767	56863	58525	62444	64111	3245	1898	51176
28	Positive	6.543	100.08414	no MS2: 2-Piperidone; CE0; XUWHAWMETYGRKB-UHFFFAOYSA-N	[M+H]+	100.07570	C5H9NO	Piperidinones	XUWHAWMETYGRKB-UHFFFAOYSA-N	C1CCN=C(C1)O	1479	1385	1398	1470	1461	1273	1410	1270	1253	1471	1470	1587	1451	1764	2316	2735	34011	36250	39329	35363	39912	37301	39179	35048	1907	1518	1845	1671	1601	1816	25857	29377	39143	36462	38443	38506	3100	2737	34345
29	Positive	0.418	100.93894	Unknown	[M+H]+	null	null	null	null	null	136	160	108	80	129	112	126	121	140	101	117	85	159	135	260	1185	320	1099	955	745	870	921	1448	1331	109	144	114	171	145	117	333	510	1226	1485	1303	928	2246	2135	732
30	Positive	0.430	100.96412	Unknown	[M+H]+	null	null	null	null	null	22	8	39	23	4	33	22	29	39	32	24	25	45	16	65	808	5575	7033	12951	11460	10919	10808	18455	16354	48	10	27	53	42	21	374	7630	13469	14416	10775	9803	1588	2889	9378
31	Positive	0.450	101.94798	Unknown	[M+H]+	null	null	null	null	null	19	14	14	9	24	10	36	13	17	8	16	10	16	20	227	483	777	743	778	805	761	838	1154	1094	20	21	16	10	10	12	258	514	855	976	884	879	1230	1373	593
32	Positive	0.578	101.94987	Unknown	[M+H]+	null	null	null	null	null	16	22	20	22	24	12	9	13	18	16	16	0	17	20	177	1088	1097	961	626	867	706	586	869	822	15	32	3	43	23	4	252	966	889	732	641	843	986	910	524
33	Positive	1.956	102.01998	Unknown	[M+H]+	null	null	null	null	null	68	64	58	54	51	44	42	54	58	39	56	48	35	48	2306	964	4693	4395	4634	4172	3791	3997	3561	3876	43	66	47	20	47	42	2794	4115	4941	4231	3897	3916	1837	2675	4773
34	Positive	0.649	102.02033	Unknown	[M+H]+	null	null	null	null	null	40	36	30	35	20	46	25	38	34	29	55	28	42	33	2441	90	14849	15277	13979	12937	13685	13456	12790	12668	38	19	41	26	29	55	5177	14251	15075	13994	12948	12794	3211	5900	14807
35	Positive	1.810	102.02129	Unknown	[M+H]+	null	null	null	null	null	40	65	72	45	86	89	70	53	58	65	80	60	51	77	1873	268	4291	4836	4324	4419	4123	3965	3636	4024	65	63	30	53	35	36	2839	4171	5000	4472	3758	3971	939	1483	4668
36	Positive	0.690	102.09777	low score: CYCLOPENTANONE	[M+NH4]+	102.09134	C5H8O	Cyclic ketones	BGTOWKSIORTVQH-UHFFFAOYSA-N	C1CCC(=O)C1	2993	1796	1268	947	697	713	760	801	723	805	738	769	532	605	3436	3235	6702	7095	4642	4343	4341	3568	2596	2464	365	393	534	462	496	751	6435	10250	5239	4152	3634	2925	2692	2973	5714
37	Positive	1.816	102.09858	low score: CYCLOPENTANONE	[M+NH4]+	102.09134	C5H8O	Cyclic ketones	BGTOWKSIORTVQH-UHFFFAOYSA-N	C1CCC(=O)C1	2508	1378	1037	797	632	670	620	652	697	685	614	598	475	464	3092	3852	8007	6931	5908	5223	5242	4209	3381	2984	429	460	432	431	541	569	6145	12712	5351	5559	3295	2971	4164	5082	7222
38	Positive	1.684	102.09904	low score: CYCLOPENTANONE	[M+NH4]+	102.09134	C5H8O	Cyclic ketones	BGTOWKSIORTVQH-UHFFFAOYSA-N	C1CCC(=O)C1	2447	1168	865	664	642	614	624	582	697	638	584	550	508	468	3392	4220	8889	7208	5572	6249	5242	4433	3416	3341	451	362	396	427	433	534	6204	13283	5366	5567	3796	3712	4088	5772	6515
39	Positive	6.472	102.09905	no MS2: CYCLOPENTANONE	[M+NH4]+	102.09134	C5H8O	Cyclic ketones	BGTOWKSIORTVQH-UHFFFAOYSA-N	C1CCC(=O)C1	1693	1082	908	811	671	542	617	590	562	643	491	610	469	518	3613	4015	11337	7876	5620	5844	4861	4167	3310	3132	377	461	456	417	460	671	16710	14240	6485	6229	4288	3354	3972	3814	7429
40	Positive	0.572	102.09943	low score: CYCLOPENTANONE	[M+NH4]+	102.09134	C5H8O	Cyclic ketones	BGTOWKSIORTVQH-UHFFFAOYSA-N	C1CCC(=O)C1	2170	1515	692	828	760	739	784	638	771	852	624	819	551	614	3164	3566	6882	7231	4726	4870	4814	3769	3045	2850	450	433	492	500	481	628	8455	10586	5244	5252	3666	2973	3467	3168	6319
41	Positive	1.597	102.09963	low score: CYCLOPENTANONE	[M+NH4]+	102.09134	C5H8O	Cyclic ketones	BGTOWKSIORTVQH-UHFFFAOYSA-N	C1CCC(=O)C1	2454	1328	694	664	642	592	638	642	608	648	594	698	458	534	3010	3750	8884	7302	5633	6254	4870	4134	3649	3341	451	362	418	424	492	548	6989	13876	6129	5373	3796	3724	3130	3813	7353
42	Positive	0.432	102.96281	Unknown	[M+H]+	null	null	null	null	null	20	34	11	8	27	13	17	25	17	8	20	7	19	18	101	298	1360	1351	2386	2117	1950	1910	3488	2907	0	9	29	12	22	19	360	1545	2653	2924	1837	1897	364	534	1845
43	Positive	0.767	102.97683	Unknown	[M+H]+	null	null	null	null	null	49	102	85	81	62	85	86	84	93	105	103	114	65	59	417	150	249	232	253	269	224	191	239	246	107	74	56	56	77	71	2421	412	153	235	238	204	159	138	153
44	Positive	1.159	103.05264	low score: (R)-4-aminoisoxazolidin-3-one	[M+H]+	103.05000	C3H6N2O2	Alpha amino acids and derivatives	DYDCUQKUCUHJBH-UWTATZPHSA-N	O=C1NOCC1N	624	574	498	605	473	552	596	502	649	510	570	732	484	481	4234	460	1062	972	888	923	1244	659	1347	923	654	593	601	607	559	475	233	1442	1500	1500	962	925	400	425	1244
45	Positive	1.793	103.06139	low score: Guanylurea	[M+H]+	103.06144	C2H6N4O	Organic carbonic acids and derivatives	SQSPRWMERUQXNE-UHFFFAOYSA-N	O=C(/N=C(\N)N)N	65	101	108	74	78	84	101	73	88	77	96	84	51	88	356	147	133	171	158	119	198	183	145	122	87	83	66	76	61	78	4692	93	129	144	163	151	109	138	156
46	Positive	0.509	103.08199	no MS2: Isovaleric acid	[M+H]+	103.08000	C5H10O2	Methyl-branched fatty acids	GWYFCOCPABKNJV-UHFFFAOYSA-N	O=C(O)CC(C)C	3311	2983	2780	3074	2665	2844	3060	3035	2981	3086	3055	2770	3153	3140	4027	4200	5038	5385	5065	5001	5001	5268	5062	4989	3049	3179	3141	3197	3132	3030	3700	4809	5059	5142	4930	5328	4506	4312	5281
47	Positive	6.405	103.08264	no MS2: Isovaleric acid	[M+H]+	103.08000	C5H10O2	Methyl-branched fatty acids	GWYFCOCPABKNJV-UHFFFAOYSA-N	O=C(O)CC(C)C	2951	2740	2926	2838	2911	3013	2909	2859	3125	2752	2814	3000	2913	2958	3733	3889	4836	4508	4720	4767	4929	4755	4363	4402	2912	3054	2755	2892	2843	2988	5429	4801	4592	4863	5069	4482	4295	4254	4738
48	Positive	0.059	103.08563	no MS2: N-Nitrosodiethylamine (NDEA)	[M+H]+	103.08659	C4H10N2O	Organic N-nitroso compounds	WBNQDOYYEUMPFS-UHFFFAOYSA-N	O=NN(CC)CC	4389	3845	4118	4111	4090	4130	3924	4093	4111	4223	4277	3987	4228	4610	2532	3009	6847	8040	8015	7716	7948	8580	8221	8568	4285	4408	3781	3960	4192	4619	4091	6663	8171	8250	8320	8430	3692	2801	7952
49	Positive	1.119	103.80354	Unknown	[M+H]+	null	null	null	null	null	514	462	467	464	233	270	366	338	312	302	274	242	674	775	0	233	815	796	1242	1349	1157	1079	1821	1859	780	577	544	679	405	367	10	1297	1283	476	1043	993	158	206	853
50	Positive	0.429	103.96303	Unknown	[M+H]+	null	null	null	null	null	62	23	26	5	28	72	24	22	36	31	11	62	28	31	34	2536	5730	6759	8997	8009	7941	8663	12564	11572	41	24	96	59	53	31	310	8048	10315	11099	8513	7844	7735	9074	7776
51	Positive	0.635	104.01570	Unknown	[M+H]+	null	null	null	null	null	18	3	16	17	1	0	10	2	3	40	12	4	34	15	363	1097	4402	4372	3102	2991	2413	2491	2169	2239	21	8	17	31	16	1	852	4751	3564	3625	2480	2514	2248	2612	4096
52	Positive	0.583	104.01591	Unknown	[M+H]+	null	null	null	null	null	18	14	22	17	6	0	10	0	12	7	14	7	10	15	439	558	4475	4295	3003	2893	2413	2555	2218	2293	19	7	17	31	16	4	864	4827	3533	3710	2460	2514	2248	2608	3974
53	Positive	1.133	104.06061	no MS2: 4-AMINOBUTANOATE	[M+H]+	104.07060	C4H9NO2	Gamma amino acids and derivatives	BTCSSZJGUNDROE-UHFFFAOYSA-N	C(CC(=O)O)CN	102	121	134	112	112	129	101	106	88	85	102	116	115	96	3102	310	874	940	983	969	1046	941	1095	1047	93	121	167	119	109	97	3679	1029	1110	820	657	650	210	322	637
54	Positive	0.878	104.11404	Choline	[M]+	104.10699	C5H14NO	Cholines	OEYIOHPDSNJKLS-UHFFFAOYSA-N	OCC[N+1](C)(C)C	53	1778	3594	92	2454	69	90	96	107	1829	2802	611	7892	82	48868	11726	3806	540	742	1014	1147	2146	3178	40	5264	72	54	4890	1174	62	59232	3698	989	1391	1773	3127	12032	9770	1890
55	Positive	1.107	104.11588	Choline	[M]+	104.10699	C5H14NO	Cholines	OEYIOHPDSNJKLS-UHFFFAOYSA-N	OCC[N+1](C)(C)C	118708	112730	129949	131822	72405	76611	90360	88772	78901	80859	58681	56452	162998	176013	186	139400	150090	152652	149018	162670	184162	189893	204266	200228	167614	169849	135702	147062	88081	90552	447	193077	147677	140223	148726	146356	79003	71631	108184
56	Positive	1.047	104.99964	Unknown	[M+H]+	null	null	null	null	null	2704	2526	2707	2672	2643	2670	2614	2555	2983	2849	3224	3306	2460	2403	94	1654	5008	4668	5375	5494	4362	4176	4553	4588	2606	2576	2656	2535	2950	2800	54	3856	4055	4666	3971	4324	2861	3044	5033
57	Positive	6.206	105.03997	Unknown	[M+H]+	null	null	null	null	null	74	79	95	85	106	79	108	73	67	79	72	79	83	87	1410	150	360	351	280	292	278	324	397	300	85	92	65	74	74	126	3522	386	343	314	349	267	153	170	295
58	Positive	0.057	105.07969	no MS2: Styrene	[M+H]+	105.06988	C8H8	Styrenes	PPBRXRYQALVLMV-UHFFFAOYSA-N	C=CC=1C=CC=CC1	2286	2012	2117	1823	1982	1973	1834	1879	1887	1838	1951	1790	2039	2055	1000	1161	4616	4892	5544	5367	5925	5245	5998	5432	2010	1842	1819	1975	2041	2001	1231	3963	5138	5392	5106	5389	1187	1044	5059
59	Positive	0.646	105.93362	Unknown	[M+H]+	null	null	null	null	null	7	5	8	7	5	13	6	1	3	10	12	0	23	10	587	2236	2512	3135	3764	3220	3369	4017	4156	3989	13	3	26	26	5	0	2173	2704	2960	2883	3916	3985	2748	3628	3357
60	Positive	0.476	105.93461	Unknown	[M+H]+	null	null	null	null	null	6	16	0	0	6	8	6	10	16	0	12	8	25	6	603	2231	1109	1433	1796	1793	1922	1959	1988	2174	10	22	19	10	6	15	2600	1448	1258	1413	1550	1691	3933	3130	1387
61	Positive	0.823	105.94308	Unknown	[M+H]+	null	null	null	null	null	38	61	42	59	57	51	48	58	87	74	55	60	60	50	117	1508	9628	10914	11719	12809	12625	12581	13680	12754	72	88	80	21	48	62	1442	11045	11342	12808	12762	11663	1210	2448	12339
62	Positive	0.425	105.96200	Unknown	[M+H]+	null	null	null	null	null	20	45	29	25	14	31	18	18	2	21	31	10	34	0	58	964	2515	3387	4455	4238	3879	4676	6595	5322	34	38	33	31	26	13	474	4136	5112	6091	4271	4532	3371	4065	3940
63	Positive	9.308	106.07778	low score: Diethanolamine; CE0; ZBCBWPMODOFKDW-UHFFFAOYSA-N	[M+H]+	106.08626	C4H11NO2	1,2-aminoalcohols	ZBCBWPMODOFKDW-UHFFFAOYSA-N	C(CO)NCCO	1061	1009	984	1075	1150	814	760	935	695	666	765	1028	1063	1594	2824	2168	1018	1116	1020	1082	1528	1161	1037	1012	1355	818	1105	1612	1491	1553	936	1033	1251	1076	1088	1246	2116	2127	1046
64	Positive	0.049	106.08464	no MS2: Diethanolamine; CE0; ZBCBWPMODOFKDW-UHFFFAOYSA-N	[M+H]+	106.08626	C4H11NO2	1,2-aminoalcohols	ZBCBWPMODOFKDW-UHFFFAOYSA-N	C(CO)NCCO	2847	2897	2948	2933	3069	3180	2678	2950	2766	2865	2921	2693	3158	2970	1624	2376	2533	2608	2794	3559	3168	2852	3065	2946	3334	3021	2814	2895	3238	2859	877	1991	2480	3649	2920	3070	1783	1592	2965
65	Positive	1.048	106.96049	Unknown	[M+H]+	null	null	null	null	null	150	147	75	119	188	73	83	100	120	121	142	90	153	190	28	292	1429	1359	1100	1546	989	1459	671	639	159	200	147	118	101	74	191	976	764	1037	1133	1224	337	482	2164
66	Positive	0.754	106.99883	Unknown	[M+H]+	null	null	null	null	null	4	5	5	4	6	13	10	21	9	18	14	8	5	11	1102	194	2282	2484	2253	2436	1950	2163	2083	2119	5	7	17	11	13	10	1597	2603	2289	2702	1849	2013	994	1556	2293
67	Positive	0.816	107.08529	Unknown	[M+H]+	null	null	null	null	null	2012	2265	2453	2450	2554	2136	2429	2018	1670	1777	2603	2313	3933	3847	3169	10534	4574	5015	5139	4653	4914	4897	5160	4842	2275	2874	3355	3580	3898	3800	1707	4389	4673	4558	5394	5376	10944	11246	5443
68	Positive	6.417	107.09273	Unknown	[M+H]+	null	null	null	null	null	7063	6668	7390	7352	6673	6766	7033	6776	6942	6546	6722	6244	7394	7835	9326	9822	11470	9635	9146	9745	8929	8877	9883	9103	6856	6966	6920	6524	7183	7205	10079	10136	10253	9998	9280	9905	11690	11577	9293
69	Positive	0.071	107.09288	Unknown	[M+H]+	null	null	null	null	null	8734	8668	8428	8445	8768	8472	8816	8512	8220	8403	8215	8371	8903	8953	9257	8978	14793	15093	16864	18354	18236	16488	16272	16347	8746	8914	8291	8755	9039	9127	6615	13594	17150	17372	17919	17140	8876	8464	16686
70	Positive	1.594	107.09355	Unknown	[M+H]+	null	null	null	null	null	7381	7019	6655	7021	6409	6826	6967	6562	6811	6758	7027	6889	7210	7584	8581	9441	10391	9793	10392	10611	10678	9748	10914	10018	7042	6940	6440	6910	7648	7362	6315	11322	10711	9861	10000	10121	10483	11081	10533
71	Positive	0.533	107.09399	Unknown	[M+H]+	null	null	null	null	null	7522	7156	7170	7275	7309	7402	7554	7880	7781	7028	7231	6952	7952	8253	8746	8282	9646	10241	9973	9642	9706	10358	10688	9984	7769	7183	7383	7550	7398	7855	6772	9354	10001	10818	10796	9516	9055	9518	9482
72	Positive	0.661	107.09425	Unknown	[M+H]+	null	null	null	null	null	7120	7337	6743	6959	6912	7218	7202	7070	6944	6852	7242	6944	7952	7866	8996	8216	8755	9396	8992	8649	8818	10497	9116	8839	7769	6689	7438	7175	6896	7346	6988	8769	9086	9759	9208	9657	9594	8980	9126
73	Positive	1.438	107.09531	Unknown	[M+H]+	null	null	null	null	null	7289	7465	6944	7583	7063	7168	7447	7449	7058	7680	7258	7028	7608	7257	7580	5957	10334	10656	10437	10539	10854	10212	10684	10197	7449	7284	7205	6780	7480	7222	6539	10636	10659	10576	10390	10060	7112	6914	10720
74	Positive	0.666	107.91245	Unknown	[M+H]+	null	null	null	null	null	9	10	0	9	6	6	15	0	10	12	16	18	11	5	5	6	2097	2181	2494	2683	2567	2633	2486	2763	9	18	11	12	10	9	219	1881	2495	2459	2656	2624	8	0	2347
75	Positive	0.592	107.91500	Unknown	[M+H]+	null	null	null	null	null	9	7	0	20	5	6	11	0	10	12	11	18	8	9	8	6	1908	2299	2494	2589	2703	2704	2636	2866	13	6	11	9	9	9	234	1950	2767	2831	2822	2605	1	6	2608
76	Positive	0.843	107.95830	Unknown	[M+H]+	null	null	null	null	null	34	8	12	4	14	10	25	28	16	15	13	24	23	32	161	249	2888	2843	2592	3102	3093	3027	2931	2788	28	19	11	14	21	32	142	2975	3167	2808	3109	2891	207	308	3231
77	Positive	0.792	108.92171	Unknown	[M+H]+	null	null	null	null	null	22	14	19	10	0	16	11	8	16	10	13	13	9	6	14	11	3937	4680	7227	7770	8638	8085	8265	7449	21	15	14	20	10	12	2519	4873	5959	6475	7953	8215	29	35	4749
78	Positive	14.356	109.10786	no MS2: Unknown (carbon number 8); PlaSMA ID-31	[M+H]+	109.10260	C8H12	Unknown	null	null	4813	4691	4898	4916	4492	4419	4700	4656	4600	4783	4847	4752	4768	4797	5911	6742	6098	6379	6413	6576	6736	6095	6757	6479	4616	4601	4253	4526	4997	4819	5100	5385	6712	6326	6303	6086	5986	21735	5301
79	Positive	0.547	109.10808	low score: Unknown (carbon number 8); PlaSMA ID-31	[M+H]+	109.10260	C8H12	Unknown	null	null	4361	3962	4117	4186	4062	4332	4280	4069	4318	3908	4176	3860	4427	4521	5326	5352	5927	6621	6469	6565	6322	6561	6454	6528	4121	4144	4178	3833	4177	4604	4438	6192	6715	6371	6378	6644	5816	5898	6335
80	Positive	6.452	109.10853	no MS2: Unknown (carbon number 8); PlaSMA ID-31	[M+H]+	109.10260	C8H12	Unknown	null	null	4060	3716	3686	3853	4210	3868	3944	4171	3827	4221	3945	3897	4057	4005	4584	5715	5804	6056	5866	5533	6371	5792	6127	5857	3942	3932	3676	3979	3990	3831	6329	6005	6144	5572	6412	6452	5391	6508	6268
81	Positive	3.787	109.10873	no MS2: Unknown (carbon number 8); PlaSMA ID-31	[M+H]+	109.10260	C8H12	Unknown	null	null	3076	2966	2892	3052	2953	3052	2985	2982	2957	3003	2854	2960	3116	3171	5319	5397	4437	4444	4291	4341	4623	4435	4994	4721	3000	2872	3050	2896	3297	3166	4441	4665	4780	4501	4574	4373	5715	5781	4514
82	Positive	12.687	109.11008	no MS2: Unknown (carbon number 8); PlaSMA ID-31	[M+H]+	109.10260	C8H12	Unknown	null	null	4596	4881	4591	4479	4724	4704	4508	4522	4559	4699	4740	4642	4738	4323	4135	5690	4897	5218	5144	5073	4907	5066	5025	5096	4871	5060	4336	4394	4813	4627	6436	4843	4905	5125	5124	4966	4517	7805	4734
83	Positive	0.066	109.11018	no MS2: Unknown (carbon number 8); PlaSMA ID-31	[M+H]+	109.10260	C8H12	Unknown	null	null	5762	5382	5358	5152	5461	5692	5848	5478	5458	5959	5781	5393	5668	5698	4520	5350	11389	11972	11878	12413	12239	12169	12486	12855	5469	5456	5283	5339	5753	5286	4702	9952	12822	12469	12413	12844	4577	5390	12056
84	Positive	12.517	109.11048	no MS2: Unknown (carbon number 8); PlaSMA ID-31	[M+H]+	109.10260	C8H12	Unknown	null	null	4884	4944	4831	4656	4911	4581	4811	4773	4676	5098	4612	4753	4283	4621	4841	4396	7163	6927	6206	6109	5832	6256	6042	5913	4680	4420	4458	4559	4859	4952	4410	6493	6077	6031	5983	5580	4198	5472	5665
85	Positive	0.452	109.94491	Unknown	[M+H]+	null	null	null	null	null	8	6	0	6	0	11	5	20	24	12	17	0	0	0	32	1062	525	502	766	783	1002	1027	1316	1606	9	20	7	8	7	17	97	823	623	1116	816	1005	2070	2249	780
86	Positive	0.638	109.95142	Unknown	[M+H]+	null	null	null	null	null	8	12	11	12	3	13	15	5	12	16	12	5	23	9	39	675	791	1073	1441	1459	1765	1510	1723	1832	0	12	7	8	13	2	86	1174	1141	1510	1581	1473	717	1217	1039
87	Positive	0.405	110.00852	Unknown	[M+H]+	null	null	null	null	null	26	120	131	184	133	85	106	38	128	70	28	99	104	37	420	3238	465	392	536	615	500	634	1067	905	115	66	90	69	108	73	142	650	665	624	484	439	2944	3659	516
88	Positive	0.731	110.00930	Unknown	[M+H]+	null	null	null	null	null	157	101	154	185	202	201	181	178	116	175	149	153	212	154	2750	1129	153	193	93	166	155	131	143	114	117	139	133	175	154	171	3607	222	103	155	116	104	1380	1016	191
89	Positive	0.874	110.01620	low score: Hypotaurine	[M+H]+	110.02702	C2H7NO2S	Sulfinic acids	VVIUBCNYACGLLV-UHFFFAOYSA-N	NCCS(O)=O	120	85	120	103	96	137	119	91	105	88	116	130	112	91	49	1044	1481	1346	1507	1496	1396	1492	1575	1576	99	71	107	95	101	102	189	1764	1890	1819	1562	1447	1313	1786	652
90	Positive	1.271	110.07226	Unknown	[M+H]+	null	null	null	null	null	2399	2559	2762	2758	2205	2208	2013	2232	2624	2361	2243	2251	2090	2281	144	11399	3932	4254	5649	4485	5300	4838	4849	4448	2910	2999	611	2602	2140	2236	135	7150	5433	5634	4187	4190	9322	7696	4897
91	Positive	0.334	110.07693	Unknown	[M+H]+	null	null	null	null	null	41	83	46	106	38	65	99	45	112	124	128	88	51	74	60	93	1789	1862	1285	1288	1519	1192	1309	1419	104	73	78	89	86	98	185	2126	1697	1597	1414	1324	128	116	1761
92	Positive	0.942	110.07919	Unknown	[M+H]+	null	null	null	null	null	927	293	422	337	914	716	890	356	474	348	320	309	964	454	350	408	1124	1901	2577	2176	2824	1940	1625	1414	313	1125	1485	480	346	360	679	1761	1868	1781	1691	1515	505	612	1541
93	Positive	0.790	110.07932	Unknown	[M+H]+	null	null	null	null	null	80	70	68	79	82	60	57	69	69	57	50	69	85	78	1688	59	246	123	186	199	145	124	195	144	39	56	76	39	43	72	4064	81	240	140	222	114	62	85	136
94	Positive	0.781	110.91987	Unknown	[M+H]+	null	null	null	null	null	5	10	7	0	5	12	15	10	8	10	5	13	1	5	12	8	1454	1622	2502	2604	2801	2735	2790	2726	15	7	15	2	0	12	468	1753	2140	2472	2710	2747	0	9	1456
95	Positive	0.440	111.96564	Unknown	[M+H]+	null	null	null	null	null	20	0	0	28	0	6	3	7	0	10	6	23	0	0	128	829	332	281	455	363	219	398	1265	455	0	6	6	7	7	6	126	328	403	541	491	319	1427	1292	118
96	Positive	0.750	111.97623	Unknown	[M+H]+	null	null	null	null	null	17	2	18	18	20	9	6	19	19	5	12	5	16	17	171	565	1107	1177	1772	1843	1742	1945	1771	1651	6	16	13	10	18	14	418	1208	1713	1768	1720	2071	657	840	1198
97	Positive	0.509	111.98409	Unknown	[M+H]+	null	null	null	null	null	18	0	22	18	11	15	15	16	0	17	0	12	10	2	123	1121	511	504	650	683	693	715	562	887	16	11	7	14	13	7	486	693	474	597	692	754	699	456	502
98	Positive	0.947	112.05187	Cytosine	[M+H]+	112.05054	C4H5N3O	Pyrimidones	OPTASPLRGRRNAP-UHFFFAOYSA-N	N=C1C=CN=C(O)N1	16	21	31	34	53	56	53	32	39	49	56	8	71	45	1441	59	84	197	38	64	65	85	52	117	135	56	33	45	54	81	1372	341	82	239	250	110	56	45	190
99	Positive	0.459	112.95605	Unknown	[M+H]+	null	null	null	null	null	26	11	8	9	19	6	0	7	21	1	28	0	22	6	352	3218	2593	2841	3420	3352	3524	3802	4465	4606	16	9	9	10	6	6	798	2342	3426	3882	4077	3685	4874	4363	3306
100	Positive	0.700	112.96437	Unknown	[M+H]+	null	null	null	null	null	32	56	26	6	20	40	115	21	31	70	36	55	88	108	370	2533	11757	12017	12530	12405	13047	13189	13314	13460	107	26	85	39	66	127	1198	10983	13713	12601	13467	13031	1839	2685	12687
101	Positive	1.539	113.00742	Unknown	[M+H]+	null	null	null	null	null	36	34	12	29	9	24	23	30	50	41	42	25	27	33	68	88	765	780	1147	1151	1328	1416	1471	1643	34	12	22	23	21	22	68	764	958	1041	1679	1573	49	63	828
102	Positive	1.131	113.04307	URACIL	[M+H]+	113.03455	C4H4N2O2	Pyrimidones	ISAKRJDGNUQOIC-UHFFFAOYSA-N	C1=CNC(=O)NC1=O	55	25	60	50	55	27	56	55	28	30	62	46	53	21	1929	30	6	88	86	112	6	37	0	180	35	24	91	41	45	26	3194	253	44	34	82	13	59	45	0
103	Positive	1.745	113.96162	Unknown	[M+H]+	null	null	null	null	null	47	89	63	63	86	98	62	78	62	110	76	50	98	105	1075	2375	1400	1344	1797	1815	1227	1858	1233	1211	68	75	124	70	102	90	1116	1557	1774	1727	1455	1512	3717	4231	1340
104	Positive	0.469	113.96585	Unknown	[M+H]+	null	null	null	null	null	27	32	25	36	45	13	27	20	26	18	18	19	47	46	1438	13078	8176	8764	10303	10591	11183	11668	14857	13799	22	8	26	17	6	23	6142	9574	9016	11765	11257	10730	25018	23810	9069
105	Positive	0.748	113.97217	Unknown	[M+H]+	null	null	null	null	null	72	93	144	71	66	48	210	165	85	157	149	176	209	156	2355	6730	17404	19015	25811	27797	29547	28721	27400	27599	145	164	205	175	179	176	6723	21767	23849	23952	29346	29949	8823	12067	19561
106	Positive	0.893	114.06798	low score: Creatinine	[M+H-H2O]+	114.06618	C4H7N3O	Alpha amino acids and derivatives	DDRJAANPRJIHGJ-UHFFFAOYSA-N	O=C(C1)NC(=N)N(C)1	52	90	154	52	62	64	140	49	164	186	142	85	276	161	1905	448	259	219	62	160	201	171	975	261	113	216	102	207	221	222	1519	210	199	157	230	264	724	365	254
107	Positive	1.165	114.07396	low score: Creatinine	[M+H]+	114.06618	C4H7N3O	Alpha amino acids and derivatives	DDRJAANPRJIHGJ-UHFFFAOYSA-N	N=C1N=C(O)CN1C	1739	1926	1697	1966	1897	1739	2194	2372	2118	2199	2779	2514	1925	1935	264	1725	1667	1966	2523	2391	1870	2160	1938	2204	1714	1675	2471	1360	3003	2562	280	2463	2906	2594	2184	2360	905	859	1298
108	Positive	1.942	114.09268	low score: Unknown (carbon number 6); PlaSMA ID-45	[M+H]+	114.09290	C6H11NO	Unknown	null	null	9392	5888	6618	7047	7357	7626	7462	8251	9021	8577	6215	6728	10691	9979	10514	11929	118550	93883	97114	96203	98362	98154	92283	91430	7335	7846	12685	11035	10656	9541	79359	106862	112464	115921	89426	95778	10661	15706	107325
109	Positive	11.069	114.10011	low score: Unknown (carbon number 6); PlaSMA ID-45	[M+H]+	114.09290	C6H11NO	Unknown	null	null	12995	12874	13331	13243	12052	12623	12818	12637	12158	11939	12728	12747	12101	12127	15332	15312	189458	179179	166235	176852	162806	174267	164055	165637	13204	13003	11186	11757	12537	12014	197394	182374	176795	187235	161480	180976	14584	13272	174270
110	Positive	6.111	114.10038	no MS2: Unknown (carbon number 6); PlaSMA ID-45	[M+H]+	114.09290	C6H11NO	Unknown	null	null	17199	17226	18282	17154	17231	16914	17542	17244	17280	17530	16944	17772	18989	18600	11804	9876	127312	127417	125564	113882	123776	106988	117282	104772	18182	17084	19274	18334	17607	17590	125031	128909	133116	118060	117001	102791	9839	9356	117440
111	Positive	0.614	114.10115	low score: Unknown (carbon number 6); PlaSMA ID-45	[M+H]+	114.09290	C6H11NO	Unknown	null	null	17015	15295	15704	15102	14306	16879	16792	16148	15754	16114	16076	16131	15718	15645	7644	9547	158232	171381	158865	154807	157322	152808	153981	151224	16004	15365	18378	15172	14869	14698	110756	165897	168419	162031	140761	159526	7108	7087	170222
112	Positive	9.529	114.10158	low score: Unknown (carbon number 6); PlaSMA ID-45	[M+H]+	114.09290	C6H11NO	Unknown	null	null	13267	12887	13736	13915	14459	14251	13958	13955	13658	14739	14314	13496	13624	12298	12338	12642	196699	187153	176533	168274	171224	172590	160000	163280	14241	14469	9002	12204	13616	12655	195501	190066	184978	191264	167769	182802	12516	10177	178455
113	Positive	0.832	114.10191	low score: Unknown (carbon number 6); PlaSMA ID-45	[M+H]+	114.09290	C6H11NO	Unknown	null	null	13328	16221	16198	15479	15517	13706	13863	16533	13637	13515	12540	13690	16365	16334	1425	6390	123393	127028	111295	108416	102679	114957	102835	98741	13183	16036	18083	16371	15234	15725	24198	116263	129676	115792	107935	103854	5703	5014	130387
114	Positive	1.680	114.10207	low score: Unknown (carbon number 6); PlaSMA ID-45	[M+H]+	114.09290	C6H11NO	Unknown	null	null	18243	16763	16422	16701	16998	18052	17430	16822	16620	17242	16753	16718	16373	15828	4729	6802	175634	172355	163766	157755	159650	150982	147376	150597	17267	17405	18755	16026	16682	15638	108107	165188	181645	157676	147301	155734	7068	7685	172876
115	Positive	0.727	114.10223	low score: Unknown (carbon number 6); PlaSMA ID-45	[M+H]+	114.09290	C6H11NO	Unknown	null	null	16835	16277	16085	15705	15517	16895	16625	16533	16444	16381	16289	15925	15818	15659	5231	6390	159853	154276	131617	127462	127997	131821	123983	121938	16004	16036	18083	16371	14414	13964	105747	141120	152480	140619	140705	133398	6540	5412	153673
116	Positive	6.261	114.10256	no MS2: Unknown (carbon number 6); PlaSMA ID-45	[M+H]+	114.09290	C6H11NO	Unknown	null	null	19211	19281	19661	19046	19438	19034	19110	18910	19307	19517	18698	19136	18989	18302	7037	8367	165474	162407	155070	145791	147273	138532	139007	127539	20163	19647	19854	18730	17519	17680	159352	165678	154218	148079	144563	131675	6342	7340	143826
117	Positive	0.509	114.94598	Unknown	[M+H]+	null	null	null	null	null	12	9	0	10	0	15	0	5	4	20	6	8	21	9	196	2279	561	541	832	809	682	685	511	478	9	0	16	6	6	10	223	695	890	839	652	716	1729	1169	717
118	Positive	0.426	114.96525	Unknown	[M+H]+	null	null	null	null	null	21	24	31	32	8	10	34	7	5	14	20	28	59	26	186	1510	4811	5218	11698	10281	9682	9670	18800	15369	32	47	19	21	39	20	585	7910	12690	14920	9434	8398	2748	3389	7488
119	Positive	0.685	114.97463	Unknown	[M+H]+	null	null	null	null	null	87	93	45	73	33	72	31	33	63	71	87	102	74	89	98	454	1919	1841	2204	2256	2248	2544	2431	2355	105	77	91	87	89	90	788	1966	2074	2116	2420	2323	701	835	1737
120	Positive	0.044	115.10302	Unknown	[M+H]+	null	null	null	null	null	731	951	749	666	727	850	728	888	668	859	787	750	927	891	1264	1458	19088	19246	18071	18744	18407	20393	21045	17950	773	897	1069	890	854	864	10584	14754	19878	20472	19395	22434	1099	1238	19865
121	Positive	0.418	115.93066	Unknown	[M+H]+	null	null	null	null	null	36	32	9	23	29	16	20	15	16	15	19	3	7	14	42	920	329	469	639	691	714	730	1036	1448	18	9	0	21	16	7	155	509	493	634	737	781	1693	1805	422
122	Positive	0.743	115.96571	Unknown	[M+H]+	null	null	null	null	null	46	28	56	33	37	47	29	56	50	35	36	36	56	59	338	684	2915	3221	2780	2681	2833	2416	2510	2809	37	26	27	37	69	41	3048	3209	2722	2801	2878	2894	698	1070	2880
123	Positive	1.390	115.96656	Unknown	[M+H]+	null	null	null	null	null	0	3	11	14	19	0	6	34	7	14	21	13	21	6	109	579	3730	3413	2431	2307	2684	2887	2989	3047	6	22	29	14	9	9	938	3360	3108	2824	2739	2908	687	1241	3548
124	Positive	0.433	115.97327	Unknown	[M+H]+	null	null	null	null	null	2	18	11	8	20	17	5	6	6	8	11	15	30	6	91	992	8199	9436	15270	13009	13186	13076	21031	18530	22	39	14	0	0	0	1500	10283	16356	16456	12693	11919	2195	3746	11391
125	Positive	1.275	116.07228	PROLINE	[M+H]+	116.07060	C5H9NO2	Proline and derivatives	ONIBWKKTOPOVIA-BYPYZUCNSA-N	C1C[C@H](NC1)C(=O)O	1003	881	898	847	1263	2177	929	1065	807	966	1439	1493	1336	1179	162	11272	11738	10810	10090	10097	11524	10495	5568	11922	805	949	995	1199	869	994	256	18076	16454	17420	3978	4094	6351	5879	7930
126	Positive	0.924	116.07836	PROLINE	[M+H]+	116.07060	C5H9NO2	Proline and derivatives	ONIBWKKTOPOVIA-BYPYZUCNSA-N	C1C[C@H](NC1)C(=O)O	625	863	802	743	850	946	130	966	776	690	1375	830	1034	918	11680	1915	2540	2838	3445	3145	3809	3075	4820	3795	818	745	176	726	882	591	21252	3970	3494	3414	3595	3010	1316	1330	2169
127	Positive	1.166	116.08111	low score: Proline	[M+H]+	116.07060	C5H9NO2	Proline and derivatives	ONIBWKKTOPOVIA-UHFFFAOYSA-N	C1CC(NC1)C(=O)O	3159	3088	3784	3619	4292	4528	3263	3303	3171	3012	5320	4892	3225	3133	182	1587	14212	13216	12932	13178	14834	13871	15624	15695	3283	3022	3091	2442	2553	2568	591	23553	22036	20816	16381	14215	1424	3091	9755
128	Positive	0.743	116.97978	Unknown	[M+H]+	null	null	null	null	null	73	46	65	57	44	64	73	38	18	49	44	69	38	49	759	530	3854	4514	3872	4041	3635	4258	4127	3675	70	63	69	36	73	60	1734	4307	4024	4962	4130	3493	1699	2365	4142
129	Positive	0.620	116.98576	Unknown	[M+H]+	null	null	null	null	null	16	33	54	31	31	67	18	13	38	18	7	28	56	17	611	228	4698	5316	5182	5187	4688	4388	4391	4646	71	40	67	45	82	28	1281	5824	4665	6036	4277	4085	1030	1481	5268
130	Positive	0.933	117.73500	Unknown	[M+H]+	null	null	null	null	null	100	212	118	14	128	267	150	164	119	143	50	114	223	63	226	30	0	54	0	140	28	27	40	70	114	271	15	73	183	180	1598	90	104	228	111	1	9	37	16
131	Positive	0.728	117.94263	Unknown	[M+H]+	null	null	null	null	null	12	17	13	10	6	8	19	19	11	10	34	20	15	19	143	259	4669	4238	4446	4629	4592	4427	4864	4408	12	21	8	15	10	11	1013	4374	4168	4623	4526	4580	523	701	4697
132	Positive	0.430	117.96753	Unknown	[M+H]+	null	null	null	null	null	8	22	16	8	9	7	12	12	7	6	16	11	6	9	90	474	3163	3732	6493	5006	5837	5181	8511	7310	19	7	7	13	17	14	636	4030	6642	7164	6025	4965	1033	1355	5477
133	Positive	0.767	117.99827	Unknown	[M+H]+	null	null	null	null	null	20	20	19	10	12	9	21	14	17	6	21	10	9	23	17	7	165	141	237	64	129	70	194	115	32	11	21	25	11	15	1575	153	110	222	115	120	31	20	202
134	Positive	14.304	118.09392	no MS2: Gyromitrin	[M+NH4]+	118.09749	C4H8N2O	N-alkylated hydrazones	IMAGWKUTFZRWSB-HWKANZROSA-N	O=CN(N=CC)C	1904	1927	1926	1940	1725	1981	1894	1846	1991	1884	1864	1769	1867	1850	689	572	3509	2852	2883	3328	2678	3039	2718	2487	1869	1890	1562	1650	1599	1931	3366	2684	3150	3157	3390	2760	600	251	2492
135	Positive	8.708	118.09476	Betaine	[M+H]+	118.08626	C5H11NO2	Alpha amino acids	KWIUHFFTVRNATP-UHFFFAOYSA-N	[O-1]C(=O)C[N+1](C)(C)C	1498	2912	3311	2096	3253	2679	2092	2303	3865	2226	2666	2822	2120	3036	2783	2585	5663	5075	4169	4969	5491	5098	5749	5501	3676	2648	3420	2353	3136	2193	4952	4616	5383	5104	5399	5420	2841	2166	5166
136	Positive	6.570	118.09476	no MS2: Gyromitrin	[M+NH4]+	118.09749	C4H8N2O	N-alkylated hydrazones	IMAGWKUTFZRWSB-HWKANZROSA-N	O=CN(N=CC)C	5640	5529	5541	5623	5875	5578	5549	5665	5394	5606	5565	5629	5271	5138	3034	3014	4701	5087	4397	4820	4927	4819	4982	4283	5708	5758	4921	4868	4935	4996	3982	4905	5364	5058	4683	5110	2632	2497	5300
137	Positive	9.117	118.09496	Betaine	[M+H]+	118.08626	C5H11NO2	Alpha amino acids	KWIUHFFTVRNATP-UHFFFAOYSA-N	[O-1]C(=O)C[N+1](C)(C)C	3552	3513	3502	3513	3505	3450	3990	3878	3453	3703	3749	3590	3460	3197	2059	2810	5640	5438	4352	4560	5139	4491	5166	4783	4113	3764	1600	3352	3137	3603	5001	5321	5118	4864	4653	5171	2513	2242	5052
138	Positive	1.200	118.09498	Betaine	[M+H]+	118.08626	C5H12NO2	Alpha amino acids	KWIUHFFTVRNATP-UHFFFAOYSA-N	O=C([O-])C[N+](C)(C)C	61453	58476	68026	69078	71930	70453	62127	60042	46231	43443	77196	79561	74233	79548	994	47667	100872	85831	70292	78511	62664	63234	74679	81873	82706	83250	91663	71756	52782	53968	2596	162415	134474	125750	112830	108096	16594	14475	50935
139	Positive	6.938	118.09502	no MS2: Gyromitrin	[M+NH4]+	118.09749	C4H8N2O	N-alkylated hydrazones	IMAGWKUTFZRWSB-HWKANZROSA-N	O=CN(N=CC)C	4797	5330	5562	5477	4449	4586	5020	4724	5062	5144	5173	5518	4602	5049	2172	2709	5396	5317	3734	5157	5352	5288	5675	5523	5636	5416	4528	4567	5120	4465	5364	5165	5555	5686	5282	5384	2375	2193	5393
140	Positive	0.913	118.09502	Betaine	[M+H]+	118.08626	C5H11NO2	Alpha amino acids	KWIUHFFTVRNATP-UHFFFAOYSA-N	[O-1]C(=O)C[N+1](C)(C)C	8018	13779	18429	16946	21530	13617	14811	14760	9180	11893	15085	14451	18750	16516	48389	5916	14348	4711	5611	6212	4892	5958	7992	7641	14463	23792	4058	26147	13836	15902	142124	19616	9922	11002	9865	12153	3987	2656	6369
141	Positive	0.417	118.09558	Betaine	[M+H]+	118.08626	C5H11NO2	Alpha amino acids	KWIUHFFTVRNATP-UHFFFAOYSA-N	[O-1]C(=O)C[N+1](C)(C)C	4447	4591	4250	4600	4442	4440	4871	4537	4718	4513	4303	4284	3960	3733	1432	4580	8700	8090	3872	4646	4523	4205	4376	4791	4679	4826	4073	4485	4203	4237	1332	7174	5154	6190	4024	4593	4121	3079	6849
142	Positive	1.143	118.09698	Betaine	[M+H]+	118.08626	C5H11NO2	Alpha amino acids	KWIUHFFTVRNATP-UHFFFAOYSA-N	[O-1]C(=O)C[N+1](C)(C)C	62632	61849	71954	71971	74423	72761	64158	61949	48862	44761	80622	81180	74233	80442	708	29845	103075	87047	71592	79363	63415	64841	75876	83098	86054	86424	92548	72453	53547	55213	3646	164609	135696	127260	114231	109393	9074	8284	51629
143	Positive	0.569	118.09819	low score: betaine	[M+H]+	118.09000	C5H11NO2	Alpha amino acids	KWIUHFFTVRNATP-UHFFFAOYSA-N	O=C([O-])C[N+](C)(C)C	4597	4603	4378	4206	4639	4602	4959	4799	5029	4472	4422	4153	4236	4322	669	855	925	1479	1115	1030	1116	1398	1291	1303	4883	4723	4250	4291	4048	4264	1280	846	1383	1110	1409	1499	901	637	1418
144	Positive	9.491	118.09842	low score: betaine	[M+H]+	118.09000	C5H11NO2	Alpha amino acids	KWIUHFFTVRNATP-UHFFFAOYSA-N	O=C([O-])C[N+](C)(C)C	3739	3911	3397	3586	4004	3407	4014	4026	3856	3665	3724	3627	2990	3190	1109	1482	5005	5223	3935	4839	4902	5415	5325	4866	3470	3303	1151	2592	3143	3117	5270	5242	5569	4438	4892	4807	1223	1132	4705
145	Positive	0.450	118.94256	Unknown	[M+H]+	null	null	null	null	null	26	0	16	13	16	8	6	0	12	6	7	0	7	0	153	600	526	644	684	500	608	512	504	512	23	8	8	7	0	0	436	419	555	573	627	482	1023	1069	490
146	Positive	1.143	119.05650	no MS2: Indazole	[M+H]+	119.06037	C7H6N2	Indazoles	BAXOFTOLAUCFNW-UHFFFAOYSA-N	c1n[nH]c2ccccc12	62	50	97	143	18	48	72	78	153	154	102	96	60	125	2956	55	307	165	361	113	202	138	215	174	62	121	106	92	142	122	4798	522	343	726	59	110	76	79	290
147	Positive	7.589	119.08432	low score: beta-N-Methylaminoalanine	[M+H]+	119.08150	C4H10N2O2	Alpha amino acids	UJVHVMNGOZXSOZ-VKHMYHEASA-N	O=C(O)C(N)CNC	99	140	98	165	140	158	220	169	147	80	170	81	375	365	1363	4233	767	806	460	510	714	527	607	594	170	199	475	409	269	335	590	590	612	782	797	600	1250	1213	663
148	Positive	8.523	119.08497	no MS2: beta-N-Methylaminoalanine	[M+H]+	119.08150	C4H10N2O2	Alpha amino acids	UJVHVMNGOZXSOZ-VKHMYHEASA-N	O=C(O)C(N)CNC	272	325	238	223	135	178	222	252	250	334	268	311	381	514	5818	1274	700	697	896	964	788	979	914	688	249	133	5274	474	537	469	4316	852	1140	549	552	812	1249	1196	768
149	Positive	0.059	119.09361	Unknown	[M+H]+	null	null	null	null	null	1326	1238	1355	1440	1562	1216	1280	1457	1428	1421	1351	1421	1509	1678	1005	1429	4980	5402	5706	5623	5849	5659	6111	5523	1181	1314	1348	1645	1482	1566	1111	4093	5896	5836	6035	6281	1567	904	5839
150	Positive	8.125	119.09401	Unknown	[M+H]+	null	null	null	null	null	6467	6871	5246	5255	6777	6276	4435	4286	3196	3865	1995	2221	5205	4077	1283	1266	1562	1811	1747	1822	1605	1485	1661	1678	8433	8424	1228	4605	6057	6737	1491	1823	1872	1825	1665	1594	1040	1146	1572
151	Positive	7.804	119.09478	Unknown	[M+H]+	null	null	null	null	null	1267	1321	1228	1382	1212	1386	1314	1212	1173	1199	1255	1160	1343	1104	1130	1095	2664	2581	5845	6801	3075	3106	3982	4348	1216	1284	1139	1294	1356	1320	1497	3224	5312	5825	3684	3804	1057	857	3494
152	Positive	0.427	119.96642	Unknown	[M+H]+	null	null	null	null	null	6	18	8	11	8	6	6	0	13	12	14	0	6	6	27	131	302	577	983	730	749	849	1481	1064	0	0	7	13	2	1	179	731	1066	1071	856	691	95	314	867
153	Positive	0.643	119.98585	Unknown	[M+H]+	null	null	null	null	null	17	11	14	10	17	0	4	10	1	8	10	7	5	13	15	17	2420	2845	2998	2973	2630	2921	2688	2770	18	0	7	11	8	13	840	2555	2870	3245	2724	2606	15	21	2635
154	Positive	0.913	120.07340	no MS2: L-Threonine; CE0; AYFVYJQAPQTCCC-GBXIJSLDSA-N	[M+H]+	120.06552	C4H9NO3	L-alpha-amino acids	AYFVYJQAPQTCCC-GBXIJSLDSA-N	C[C@H]([C@@H](C(=O)O)N)O	43	64	132	98	40	59	110	91	77	119	100	81	49	57	1942	2649	550	338	303	314	304	219	370	375	38	41	39	83	44	71	2263	455	516	459	367	374	2099	1299	363
155	Positive	1.250	120.07952	no MS2: Indoline	[M+H]+	120.08077	C8H9N	Indolines	LPAGFVYQRIESJQ-UHFFFAOYSA-N	C1CC2=CC=CC=C2N1	400	650	775	323	904	1020	406	940	283	494	855	1142	1397	1430	655	6810	8813	9568	10510	9373	9132	9681	11040	10132	437	891	2609	824	471	408	80	13329	11839	13576	9527	8223	4900	5105	11949
156	Positive	2.134	120.08136	low score: PHENYLETHANOLAMINE	[M-H2O+H]+	120.08077	C8H11NO	Aralkylamines	ULSIYEODSMZIPX-UHFFFAOYSA-N	NCC(O)C1=CC=CC=C1	35	28	39	20	44	36	26	14	40	38	36	18	32	31	22532	204	167	146	182	121	139	168	105	189	22	30	33	43	38	32	650	157	146	163	158	159	183	162	175
157	Positive	1.161	120.08158	PHENYLETHANOLAMINE	[M-H2O+H]+	120.08077	C8H11NO	Aralkylamines	ULSIYEODSMZIPX-UHFFFAOYSA-N	NCC(O)C1=CC=CC=C1	4660	4792	5434	5399	5138	5501	4102	4502	4668	4551	4878	4906	3717	4048	40825	6886	16513	16270	19319	19060	17760	18988	20032	21283	4644	4423	7576	3731	4084	3889	80	24603	23733	22169	15989	14865	5562	6049	20537
158	Positive	1.539	120.08880	PHENYLETHANOLAMINE	[M-H2O+H]+	120.08077	C8H11NO	Aralkylamines	ULSIYEODSMZIPX-UHFFFAOYSA-N	NCC(O)C1=CC=CC=C1	162	189	166	228	186	219	187	204	148	211	124	200	152	243	486	715	549	555	767	662	615	586	716	663	102	181	175	168	173	201	29987	776	750	698	561	484	851	767	648
159	Positive	1.770	120.09028	low score: PHENYLETHANOLAMINE	[M-H2O+H]+	120.08077	C8H11NO	Aralkylamines	ULSIYEODSMZIPX-UHFFFAOYSA-N	NCC(O)C1=CC=CC=C1	131	84	105	120	75	126	116	82	109	91	132	83	143	163	955	277	367	367	304	407	364	373	349	379	132	130	172	154	134	132	39268	303	397	429	315	302	219	270	272
160	Positive	6.569	120.09048	low score: PHENYLETHANOLAMINE	[M-H2O+H]+	120.08077	C8H11NO	Aralkylamines	ULSIYEODSMZIPX-UHFFFAOYSA-N	NCC(O)C1=CC=CC=C1	124	142	108	114	115	138	125	110	108	130	91	113	133	148	532	212	361	305	361	295	281	326	361	331	139	141	143	133	111	175	1899	323	423	287	323	376	233	250	290
161	Positive	0.455	120.91705	Unknown	[M+H]+	null	null	null	null	null	17	12	23	26	22	16	7	23	29	17	16	38	25	18	5	6	671	777	1130	1100	1228	1096	1296	1383	8	15	16	16	13	16	69	729	858	1118	1192	1171	12	11	1069
162	Positive	0.434	120.96832	Unknown	[M+H]+	null	null	null	null	null	19	7	0	7	0	8	6	20	6	12	13	18	0	14	38	623	437	608	638	592	684	649	1333	1071	6	10	8	0	6	3	131	482	810	477	319	839	1210	1409	517
163	Positive	0.638	120.97614	Unknown	[M+H]+	null	null	null	null	null	6	3	14	16	17	4	16	8	6	10	10	5	14	13	37	612	663	718	1023	1017	1079	868	994	1068	19	7	19	20	8	5	92	733	940	944	1062	1228	510	639	839
164	Positive	0.616	121.03821	no MS2: UROCANATE	[M-H2O+H]+	121.03964	C6H6N2O2	Imidazolyl carboxylic acids and derivatives	LOIYMIARKYCTBW-OWOJBTEDSA-N	OC(=O)\C=C\C1=CNC=N1	372	345	361	458	427	288	387	394	400	439	411	393	446	438	555	397	1485	1487	1459	1488	1500	1370	1466	1447	387	368	446	360	405	453	1111	1345	1492	1373	1439	1538	509	457	1645
165	Positive	0.062	121.07280	no MS2: Urea	[2M+H]+	121.07200	CH4N2O	Ureas	XSQUKJJJFZCRTK-UHFFFAOYSA-N	NC(N)=O	230	207	194	205	202	178	186	140	151	184	229	194	216	237	414	318	2877	3335	3651	3656	3828	3717	3862	3456	202	202	164	191	183	253	542	2533	3575	3527	4152	3701	253	396	3517
166	Positive	0.426	121.97478	Unknown	[M+H]+	null	null	null	null	null	10	11	21	6	0	14	9	0	8	6	11	7	8	8	27	153	836	1037	1064	1111	1004	978	1570	1569	6	0	7	6	9	13	271	955	1359	1424	1115	990	564	566	1145
167	Positive	0.637	121.98371	Unknown	[M+H]+	null	null	null	null	null	0	0	9	7	5	6	10	5	0	7	7	10	13	20	26	31	1436	1565	1444	1491	1314	1585	1448	1639	10	4	19	0	13	5	435	1600	1434	1691	1336	1426	51	51	1467
168	Positive	0.207	122.09649	no MS2: 2,6-Xylidine	[M+H]+	122.09643	C8H11N	m-Xylenes	UFFBMTHBGFGIHF-UHFFFAOYSA-N	CC1=CC=CC(C)=C1N	47	49	37	25	37	18	78	82	45	78	62	38	105	119	677	5243	4259	3374	1683	2415	1797	2259	2213	1862	46	32	83	90	83	46	774	3803	2995	2419	2296	1764	6526	8520	2591
169	Positive	0.363	122.10365	2,6-Xylidine	[M+H]+	122.09643	C8H11N	m-Xylenes	UFFBMTHBGFGIHF-UHFFFAOYSA-N	Cc1cccc(c1N)C	152	144	127	120	126	104	152	154	142	138	158	135	132	164	700	3042	8468	8094	5067	4941	4622	4738	4679	4792	70	136	158	142	126	187	1443	9746	5926	6038	4835	4828	6685	9223	7080
170	Positive	1.166	122.10381	no MS2: 2,6-Xylidine	[M+H]+	122.09643	C8H11N	m-Xylenes	UFFBMTHBGFGIHF-UHFFFAOYSA-N	CC1=CC=CC(C)=C1N	48	75	109	63	68	102	116	60	114	50	105	143	118	109	825	811	2360	1525	1083	1099	860	1294	821	1096	129	142	91	121	105	123	2361	1238	792	892	1423	892	1874	2048	975
171	Positive	5.916	122.10511	2,6-Xylidine	[M+H]+	122.09643	C8H11N	m-Xylenes	UFFBMTHBGFGIHF-UHFFFAOYSA-N	Cc1cccc(c1N)C	170	150	127	117	128	109	117	115	98	117	136	82	161	155	1871	1449	5078	4908	3589	3343	3402	3034	3372	2866	144	199	159	187	269	201	8523	5705	3877	3294	3212	2905	1553	1295	4060
172	Positive	14.460	122.10527	no MS2: 2,6-Xylidine	[M+H]+	122.09643	C8H11N	m-Xylenes	UFFBMTHBGFGIHF-UHFFFAOYSA-N	CC1=CC=CC(C)=C1N	80	163	168	174	175	111	122	153	142	127	108	130	192	219	3375	2961	9915	9175	7585	7344	6975	7166	6899	7102	160	121	165	199	167	173	12644	10502	8136	7798	6930	7480	4914	1294	8651
173	Positive	0.448	122.96406	Unknown	[M+H]+	null	null	null	null	null	0	12	6	11	0	10	17	6	0	0	0	7	10	16	260	9134	2929	2743	5029	4933	5562	5596	12377	12582	0	0	5	6	12	7	561	8853	3720	8456	5517	6563	17386	19593	3280
174	Positive	6.296	122.97204	Unknown	[M+H]+	null	null	null	null	null	7	5	5	12	5	5	13	12	0	8	10	9	0	8	144	335	1641	1950	1422	1554	1546	1512	1563	1670	0	0	5	0	8	5	2452	2546	1474	1697	1690	1529	718	994	1788
175	Positive	0.636	122.97211	Unknown	[M+H]+	null	null	null	null	null	9	13	8	9	8	12	0	11	0	8	14	5	9	5	239	5372	7370	8277	12729	12470	13893	14097	14664	15087	5	9	8	0	15	11	727	9777	10662	11383	14728	13338	5748	9107	8733
176	Positive	1.695	122.97218	Unknown	[M+H]+	null	null	null	null	null	21	7	12	5	22	7	5	28	10	18	11	13	0	9	182	1543	1325	1407	1624	1857	1679	1693	1854	1809	8	6	15	7	12	5	216	1536	1613	1592	1634	1698	2078	3627	1525
177	Positive	6.499	122.97230	Unknown	[M+H]+	null	null	null	null	null	10	18	10	9	10	12	7	0	9	12	9	8	0	10	62	405	2105	2151	1367	1537	1460	1605	1604	1386	11	5	4	10	13	0	3123	2580	1814	1779	1690	1420	683	1102	2035
178	Positive	0.070	122.97356	Unknown	[M+H]+	null	null	null	null	null	12	0	20	0	10	15	21	8	18	8	8	8	16	26	260	21	151	20	16	13	22	23	11	40	0	0	7	8	0	13	1101	2269	13	24	66	14	0	0	54
179	Positive	1.174	123.05211	4-HYDROXYBENZALDEHYDE	[M+H]+	123.04405	C7H6O2	Hydroxybenzaldehydes	RGHHSNMVTDWUBI-UHFFFAOYSA-N	C1=CC(=CC=C1C=O)O	1696	1716	1548	1532	1676	211	1403	1412	1801	1585	205	160	1778	1780	9260	1568	1733	2310	2499	1062	1207	2624	1754	1336	3049	2854	2805	2108	1592	1467	10268	1614	2332	2711	870	1475	582	631	705
180	Positive	6.359	123.05362	4-HYDROXYBENZALDEHYDE	[M+H]+	123.04405	C7H6O2	Hydroxybenzaldehydes	RGHHSNMVTDWUBI-UHFFFAOYSA-N	C1=CC(=CC=C1C=O)O	57	29	40	75	31	38	38	57	34	55	39	24	70	121	90	138	210	332	277	224	320	237	265	251	70	39	66	71	76	64	1653	233	247	204	226	302	143	153	238
181	Positive	1.052	123.05431	NICOTINAMIDE	[M+H]+	123.05529	C6H6N2O	Nicotinamides	DFPAKSUCGFBDDF-UHFFFAOYSA-N	C1=CC(=CN=C1)C(=O)N	372	285	243	456	234	252	278	249	270	331	320	247	421	626	9000	714	539	700	1092	1048	1365	1267	686	462	230	490	304	819	830	796	2667	827	1179	1052	840	813	568	405	577
182	Positive	1.291	123.09868	no MS2: 4-(Dimethylamino)pyridine	[M+H]+	123.09167	C7H10N2	Dialkylarylamines	VHYFNPMBLIVWCW-UHFFFAOYSA-N	N=1C=CC(=CC1)N(C)C	870	883	893	817	822	735	807	766	824	707	829	943	699	772	180	772	2844	2836	1580	2290	1924	2510	2474	2541	874	863	630	634	742	847	617	2551	2785	2644	2377	2165	740	726	2485
183	Positive	14.353	123.09988	no MS2: 4-(Dimethylamino)pyridine	[M+H]+	123.09167	C7H10N2	Dialkylarylamines	VHYFNPMBLIVWCW-UHFFFAOYSA-N	N=1C=CC(=CC1)N(C)C	988	1026	1021	806	834	964	936	1073	973	1062	1004	857	754	638	1245	1764	6336	6527	6442	6767	6309	6373	6333	6617	978	1016	863	730	657	670	5115	6252	6680	6574	6656	6144	2570	398	6122
184	Positive	0.454	123.10201	4-Dimethylaminopyridine	[M+H]+	123.09167	C7H10N2	Dialkylarylamines	VHYFNPMBLIVWCW-UHFFFAOYSA-N	CN(C)c1ccncc1	645	696	878	894	614	553	549	804	646	614	673	557	457	561	124	846	7361	7044	5621	6323	6430	6513	5331	5901	702	693	472	453	559	473	540	7879	5981	6464	5662	5773	550	997	6656
185	Positive	12.519	123.12449	low score: Unknown (carbon number 9); PlaSMA ID-67	[M+H]+	123.11900	C9H14	Unknown	null	null	373	365	310	530	414	388	325	384	392	411	347	426	556	463	669	883	2688	2769	1676	1704	1666	1666	1721	1743	423	312	396	502	562	480	866	1888	1824	1799	1503	1923	767	859	1570
186	Positive	9.264	124.09420	HISTIDINOL	[M-H2O+H]+	124.08692	C6H11N3O	Aralkylamines	ZQISRDCJNBUVMM-YFKPBYRVSA-N	N[C@H](CO)CC1=CN=CN1	1461	1850	1335	1514	1690	1723	1975	1682	1635	1730	1500	1612	1180	1144	5059	3977	16474	16068	15223	16371	16053	17124	16611	16589	1711	1568	2300	895	1383	1462	15109	14846	16248	16641	16558	15208	4460	4647	16617
187	Positive	8.862	124.09435	low score: HISTIDINOL	[M-H2O+H]+	124.08692	C6H11N3O	Aralkylamines	ZQISRDCJNBUVMM-YFKPBYRVSA-N	N[C@H](CO)CC1=CN=CN1	2587	2194	1945	2484	2394	2570	3247	1960	2777	2485	2236	3005	2358	2546	5419	3432	14449	14743	14272	15396	16034	14470	16236	16237	2079	2810	2762	2387	2804	1969	14161	14604	15546	14339	15983	13983	3476	3881	16162
188	Positive	1.296	124.09473	HISTIDINOL	[M-H2O+H]+	124.08692	C6H11N3O	Aralkylamines	ZQISRDCJNBUVMM-YFKPBYRVSA-N	N[C@H](CO)CC1=CN=CN1	2202	2235	2413	2224	2204	2145	2227	2103	2287	2205	2218	2263	2014	2003	105	3243	22985	23783	18615	20236	23326	22855	20968	20232	2143	2056	1195	1908	1955	2082	721	22466	23081	23715	20692	20877	3474	3050	23696
189	Positive	0.371	124.09475	HISTIDINOL	[M-H2O+H]+	124.08692	C6H11N3O	Aralkylamines	ZQISRDCJNBUVMM-YFKPBYRVSA-N	N[C@H](CO)CC1=CN=CN1	4475	4621	4930	5068	5195	4732	4563	5338	5251	4999	4851	5176	4409	4514	170	11172	76541	84916	59452	72610	63208	68566	73493	74499	5664	4998	4864	5441	4862	4813	576	89272	75125	77868	71218	60974	18127	28560	74607
190	Positive	1.417	124.09503	low score: HISTIDINOL	[M-H2O+H]+	124.08692	C6H11N3O	Aralkylamines	ZQISRDCJNBUVMM-YFKPBYRVSA-N	N[C@H](CO)CC1=CN=CN1	1378	1428	1287	1490	1446	1669	2136	1515	1580	1397	1766	1390	1286	1463	78	1371	16294	23413	18314	15567	15430	16394	14332	13451	1528	1447	1230	1226	1218	1277	748	18339	22675	23452	15052	14420	1750	2421	17905
191	Positive	6.145	124.09556	HISTIDINOL	[M-H2O+H]+	124.08692	C6H11N3O	Aralkylamines	ZQISRDCJNBUVMM-YFKPBYRVSA-N	N[C@H](CO)CC1=CN=CN1	928	1203	1028	1117	1066	1036	1144	1015	1024	1119	1146	1033	1132	990	740	558	5220	4968	4936	5552	5819	5407	4936	5579	1097	1091	1108	968	1122	1114	4152	5683	5430	6434	4871	4800	640	611	5515
192	Positive	14.113	124.09567	no MS2: HISTIDINOL	[M-H2O+H]+	124.08692	C6H11N3O	Aralkylamines	ZQISRDCJNBUVMM-YFKPBYRVSA-N	N[C@H](CO)CC1=CN=CN1	4660	5016	4662	4751	5073	4973	4976	4876	4959	5082	5009	5030	4653	4583	4050	4436	81971	84619	67948	69091	79871	82399	78037	73450	5191	5312	4508	4592	4752	4668	58168	61029	87130	81313	81607	73698	6033	289	69828
193	Positive	10.816	124.09568	HISTIDINOL	[M-H2O+H]+	124.08692	C6H11N3O	Aralkylamines	ZQISRDCJNBUVMM-YFKPBYRVSA-N	N[C@H](CO)CC1=CN=CN1	3781	2726	3841	3039	2912	3707	3095	3355	2758	2351	3901	3683	3414	3427	3820	4506	24108	25493	23532	25423	24559	25123	24741	24273	3295	2821	3231	2419	2378	2778	21094	24197	24641	23268	24296	23483	5251	5574	24546
194	Positive	13.366	124.09581	no MS2: HISTIDINOL	[M-H2O+H]+	124.08692	C6H11N3O	Aralkylamines	ZQISRDCJNBUVMM-YFKPBYRVSA-N	N[C@H](CO)CC1=CN=CN1	2817	3920	2183	2056	3181	3528	3535	3664	4092	3806	4369	3668	3332	3205	3868	4207	58050	58514	54189	54762	59152	63287	58356	62105	3670	3833	3964	3559	3324	2650	46260	51602	62224	60026	62751	57670	5686	495	52728
195	Positive	17.138	124.09583	no MS2: HISTIDINOL	[M-H2O+H]+	124.08692	C6H11N3O	Aralkylamines	ZQISRDCJNBUVMM-YFKPBYRVSA-N	N[C@H](CO)CC1=CN=CN1	6140	6117	5408	5689	5900	5900	6146	5888	5614	5811	6192	5751	5162	5479	3878	5925	29421	27322	34869	36207	35319	37579	42761	38904	5769	5671	5026	5294	5966	5238	27303	23431	37695	35227	41285	39646	9438	287	28091
196	Positive	10.956	124.09587	low score: HISTIDINOL	[M-H2O+H]+	124.08692	C6H11N3O	Aralkylamines	ZQISRDCJNBUVMM-YFKPBYRVSA-N	N[C@H](CO)CC1=CN=CN1	3123	3835	2859	3928	3202	3822	4054	3940	3644	3562	3211	3743	2958	2917	4765	4248	25507	25237	25106	26041	25271	27216	26374	25961	3676	3933	3305	3364	3647	3278	23638	26462	26286	25121	26178	25488	4940	5707	25994
197	Positive	14.493	124.09613	HISTIDINOL	[M-H2O+H]+	124.08692	C6H11N3O	Aralkylamines	ZQISRDCJNBUVMM-YFKPBYRVSA-N	N[C@H](CO)CC1=CN=CN1	4124	5012	4184	3864	4264	4984	3987	4846	4649	4258	4978	5028	4238	4039	2946	3490	80534	79354	67670	65122	76814	79753	77131	69963	4597	4056	4342	4515	3802	4940	63209	59258	83425	78696	77717	72626	6048	302	66070
198	Positive	15.523	124.09622	HISTIDINOL	[M-H2O+H]+	124.08692	C6H11N3O	Aralkylamines	ZQISRDCJNBUVMM-YFKPBYRVSA-N	N[C@H](CO)CC1=CN=CN1	3410	3640	2591	2570	3490	3930	3482	3081	3390	4927	3454	3612	2910	2730	3159	4830	49906	59357	49798	52609	52650	58186	63723	53515	3367	3242	3811	2905	3149	2968	50190	41904	60392	57505	60501	56587	6543	256	42818
199	Positive	13.719	124.09625	no MS2: HISTIDINOL	[M-H2O+H]+	124.08692	C6H11N3O	Aralkylamines	ZQISRDCJNBUVMM-YFKPBYRVSA-N	N[C@H](CO)CC1=CN=CN1	4671	4517	4626	4748	4602	4844	4554	4607	4749	4895	4954	5001	4336	4500	2466	4269	70137	72234	64978	61265	69196	72881	70479	67647	4737	4596	4117	4167	4359	4473	51602	57851	76813	71060	75358	65782	5298	441	63733
200	Positive	12.360	124.09628	no MS2: HISTIDINOL	[M-H2O+H]+	124.08692	C6H11N3O	Aralkylamines	ZQISRDCJNBUVMM-YFKPBYRVSA-N	N[C@H](CO)CC1=CN=CN1	4282	4354	3874	4271	4200	4279	4339	4005	4385	4376	4349	4558	3912	4186	2840	4048	39095	40604	39115	38118	39530	41459	38905	40054	4320	4490	4032	3834	3951	4131	34688	37402	41300	40287	41414	38321	4068	4023	40005
201	Positive	11.111	124.09629	low score: HISTIDINOL	[M-H2O+H]+	124.08692	C6H11N3O	Aralkylamines	ZQISRDCJNBUVMM-YFKPBYRVSA-N	N[C@H](CO)CC1=CN=CN1	4065	3856	4022	4210	3990	3777	3962	4014	3880	3717	4145	3824	3750	3935	4384	4438	26355	25679	24847	26028	26367	27201	29266	28690	3669	4066	2093	3349	3674	3612	23428	25827	27194	25688	28215	26183	4391	5826	28576
202	Positive	14.255	124.09641	HISTIDINOL	[M-H2O+H]+	124.08692	C6H11N3O	Aralkylamines	ZQISRDCJNBUVMM-YFKPBYRVSA-N	N[C@H](CO)CC1=CN=CN1	5216	5070	4947	5128	5262	4950	4892	4876	4762	5095	5085	5150	4865	4666	2824	3902	74966	85975	69603	69055	78463	78115	79303	70870	5341	5221	4479	4305	4752	4675	62887	50668	82164	79178	84033	75048	5144	309	70577
203	Positive	7.058	124.09653	no MS2: HISTIDINOL	[M-H2O+H]+	124.08692	C6H11N3O	Aralkylamines	ZQISRDCJNBUVMM-YFKPBYRVSA-N	N[C@H](CO)CC1=CN=CN1	1802	1759	1822	1926	1876	1584	1942	1777	1929	1891	2048	1905	1558	1550	1788	1435	8034	7668	6480	7094	7712	8033	7864	7901	1985	1811	1655	1701	1764	1753	7483	8393	8618	8149	8865	7552	1169	1942	8085
204	Positive	15.391	124.09674	no MS2: HISTIDINOL	[M-H2O+H]+	124.08692	C6H11N3O	Aralkylamines	ZQISRDCJNBUVMM-YFKPBYRVSA-N	N[C@H](CO)CC1=CN=CN1	5412	5279	5515	5718	5742	5800	5484	5341	5296	5517	5305	5474	5203	5289	3098	4591	58296	62202	53995	54532	56502	63255	62884	55682	5362	5680	4703	4950	5055	4938	53453	44800	63451	63453	61790	57847	5948	172	45932
205	Positive	13.951	124.09676	HISTIDINOL	[M-H2O+H]+	124.08692	C6H11N3O	Aralkylamines	ZQISRDCJNBUVMM-YFKPBYRVSA-N	N[C@H](CO)CC1=CN=CN1	5000	4955	4777	4930	4932	4646	4987	4935	4994	4992	4886	5083	4594	4746	2976	3937	78780	80960	64091	65577	76544	79174	76754	75430	5276	5118	4075	4298	4155	4635	56956	60085	82304	78828	79624	74940	4472	229	71191
206	Positive	13.521	124.09746	HISTIDINOL	[M-H2O+H]+	124.08692	C6H11N3O	Aralkylamines	ZQISRDCJNBUVMM-YFKPBYRVSA-N	N[C@H](CO)CC1=CN=CN1	4015	3984	3750	4746	4577	3604	3845	3718	4432	4308	4968	4690	3356	3265	3234	3164	64545	67620	57238	55619	66633	67782	64325	68103	3826	5295	3077	4035	4378	3619	49151	59192	68668	67406	69459	64061	3928	346	58919
207	Positive	9.125	124.09804	Unknown	[M+H]+	null	null	null	null	null	3017	3127	2910	3036	2963	3630	3030	3602	2939	3183	3268	3155	3154	2883	2399	2654	16564	14450	15853	14995	14355	15447	15680	15007	3220	2862	1540	2658	2777	2766	14647	14041	16898	14646	16540	14328	1754	2717	16826
208	Positive	0.509	124.96252	Unknown	[M+H]+	null	null	null	null	null	6	12	6	28	0	20	33	11	4	24	6	10	7	15	106	1104	2459	4157	6158	1102	4614	4901	8430	6835	22	25	1	17	0	14	347	3943	4806	6510	5517	4960	2233	4151	5173
209	Positive	0.433	124.97337	Unknown	[M+H]+	null	null	null	null	null	13	23	2	5	12	19	30	6	8	34	0	8	9	0	18	661	8364	10536	19141	17148	15382	15612	24908	21270	24	8	7	13	6	17	351	10582	18866	18666	15012	13424	2290	4182	12101
210	Positive	1.122	125.02950	no MS2: (R)-4-aminoisoxazolidin-3-one	[M+Na]+	125.03000	C3H6N2O2	Alpha amino acids and derivatives	DYDCUQKUCUHJBH-UWTATZPHSA-N	O=C1NOCC1N	716	726	727	568	594	763	616	504	742	780	956	760	431	435	14	358	387	1013	1564	1359	686	891	1118	773	653	573	300	460	642	567	61	485	958	466	897	1208	1245	993	1813
211	Positive	0.230	125.08895	Unknown	[M+H]+	null	null	null	null	null	784	777	629	776	873	1085	972	912	912	925	803	861	814	959	421	1508	3776	4386	2956	3173	3128	3081	3936	3609	793	835	752	750	758	779	98	4974	2693	3893	3598	3445	2142	1573	3461
212	Positive	12.613	125.14198	Unknown	[M+H]+	null	null	null	null	null	281	204	250	280	223	242	296	160	237	317	248	240	241	213	344	338	533	921	1139	1162	469	844	1016	1235	288	299	226	252	220	220	1144	410	889	865	503	424	107	263	857
213	Positive	0.435	125.98019	Unknown	[M+H]+	null	null	null	null	null	7	24	8	7	8	8	0	30	12	2	19	7	22	25	178	1079	1788	2451	3568	3375	3274	2920	5013	4240	6	16	12	0	19	15	207	3114	4290	4899	3542	2453	1246	1250	2322
214	Positive	0.767	125.99300	Unknown	[M+H]+	null	null	null	null	null	296	257	286	373	358	328	243	284	288	290	280	316	337	293	799	759	916	714	487	509	796	493	716	413	302	305	272	308	308	273	2989	853	535	573	545	704	434	390	868
215	Positive	0.924	126.02055	TAURINE	[M+H]+	126.02194	C2H7NO3S	Organosulfonic acids	XOAAWQZATWQOTB-UHFFFAOYSA-N	C(CS(=O)(=O)O)N	10	82	178	64	38	8	46	96	78	77	61	36	142	127	9262	376	67	32	60	63	34	75	75	21	65	48	14	216	195	121	7436	59	49	38	67	54	285	173	50
216	Positive	1.262	126.03165	TAURINE	[M+H]+	126.02194	C2H7NO3S	Organosulfonic acids	XOAAWQZATWQOTB-UHFFFAOYSA-N	C(CS(=O)(=O)O)N	828	888	768	831	1217	962	1345	1221	943	1192	805	756	962	907	98	5728	7496	6931	8486	7428	6491	6834	8192	7988	1781	1471	744	1092	780	651	24	6559	5800	5830	7201	8507	3486	3924	5793
217	Positive	1.128	126.03425	no MS2: 2-Aminoethylphosphonic acid	[M+H]+	126.03146	C2H8NO3P	Organic phosphonic acids	QQVDJLLNRSOCEL-UHFFFAOYSA-N	O=P(O)(O)CCN	2485	2507	2741	2547	3197	3431	2913	2984	2718	2670	1700	1761	3189	2954	83	667	211	139	470	576	624	88	639	706	4412	4068	3503	3676	1947	2004	199	460	478	191	918	1088	380	295	233
218	Positive	6.710	126.03426	no MS2: 2-Aminoethylphosphonic acid	[M+H]+	126.03146	C2H8NO3P	Organic phosphonic acids	QQVDJLLNRSOCEL-UHFFFAOYSA-N	O=P(O)(O)CCN	16	22	20	26	6	42	19	38	35	15	20	0	20	2	55	0	10	21	751	434	47	21	19	12	23	21	16	32	11	23	16	14	12	6	27	25	12	33	0
219	Positive	0.432	126.97633	Unknown	[M+H]+	null	null	null	null	null	6	14	30	21	39	15	42	18	8	61	29	42	13	32	52	1302	11003	12497	25080	20754	20852	20646	33532	29614	29	22	23	33	47	28	473	13951	24156	26768	20559	17940	2812	4834	16831
220	Positive	0.947	127.03928	low score: Maltol	[M+H]+	127.03900	C6H6O3	Pyranones and derivatives	XPCTZQVDEJYUGT-UHFFFAOYSA-N	O=C1C=COC(=C1O)C	47	120	91	68	98	105	72	191	108	94	46	62	116	69	2541	33	76	15	47	65	35	70	59	40	138	89	14	180	158	170	2214	73	27	28	28	30	60	20	103
221	Positive	0.767	128.02820	no MS2: 4-Chloroaniline	[M+H]+	128.02615	C6H6ClN	Aniline and substituted anilines	QSNSCYSYFYORTR-UHFFFAOYSA-N	NC1=CC=C(Cl)C=C1	49	29	37	56	44	48	48	20	50	32	52	23	28	46	461	145	27	0	0	0	39	6	62	37	61	44	40	28	38	33	1033	31	16	20	6	44	177	260	16
222	Positive	0.459	128.95177	Unknown	[M+H]+	null	null	null	null	null	7	8	18	0	16	6	17	9	6	13	6	13	12	0	417	1810	6735	6410	8228	8237	7717	8800	13412	14146	6	6	16	6	7	10	2594	4710	5802	6604	6144	6212	3301	4441	6056
223	Positive	0.748	128.96040	Unknown	[M+H]+	null	null	null	null	null	36	10	10	36	40	48	31	38	30	30	27	26	43	35	292	1263	22104	23171	22249	22644	21823	22625	22007	21452	55	48	54	56	55	59	3558	23280	22332	23836	21843	20623	1174	1839	24306
224	Positive	1.293	128.99411	no MS2: 3-Thiophenecarboxylic acid	[M+H]+	129.00047	C5H4O2S	Thiophene carboxylic acids	YNVOMSDITJMNET-UHFFFAOYSA-N	OC(=O)c(c1)csc1	7	15	0	15	0	14	12	6	10	7	0	15	11	11	93	350	1827	1923	646	709	1512	1574	1399	1177	11	6	40	18	0	23	821	2584	1246	1506	1422	1352	79	335	1315
225	Positive	7.405	129.08075	Unknown	[M+H]+	null	null	null	null	null	105	113	83	95	62	173	46	149	43	80	180	53	103	97	239	161	972	1063	1040	901	847	939	975	931	70	45	98	64	66	89	1418	951	960	972	933	1113	191	232	1012
226	Positive	0.679	129.94371	Unknown	[M+H]+	null	null	null	null	null	8	12	10	6	0	7	11	5	0	8	5	9	10	0	24	107	2045	2054	3091	3373	3667	3874	3989	3880	12	0	6	9	5	5	702	2264	2628	3273	3746	3614	81	156	2320
227	Positive	0.597	129.94412	Unknown	[M+H]+	null	null	null	null	null	8	10	10	6	6	7	15	5	0	13	6	9	11	4	7	135	2011	2335	3463	3464	3745	3936	4054	3867	10	12	6	9	5	5	705	2747	2615	3202	3835	3670	129	201	2535
228	Positive	0.681	130.01582	Unknown	[M+H]+	null	null	null	null	null	5	19	22	13	14	19	0	20	3	8	5	10	10	9	559	73	2622	2541	2383	2394	2290	2206	2200	2380	9	14	18	8	10	6	1134	2868	2367	2959	2202	2322	633	944	2513
229	Positive	0.913	130.04953	no MS2: O-Acetylserine	[M+H-H2O]+	130.04987	C5H9NO4	L-alpha-amino acids	VZXPDPZARILFQX-UHFFFAOYSA-N	CC(=O)OCC(C(=O)O)N	70	81	77	60	110	68	103	86	75	152	43	38	97	115	14622	1132	514	418	537	611	448	644	567	588	26	69	35	238	143	223	12903	812	480	649	598	649	1189	840	712
230	Positive	1.134	130.05862	no MS2: Indole-3-carbinol	[M+H-H2O]+	130.06512	C9H9NO	3-alkylindoles	IVYPNXXAYMYVSP-UHFFFAOYSA-N	C1=CC=C2C(=C1)C(=CN2)CO	3155	2968	2962	3007	3782	3672	3335	3216	3843	3698	2503	2601	2399	2414	2519	2423	7629	6347	9441	18565	17232	16576	15588	15074	3064	2904	2901	2627	3395	3426	4746	19951	8146	8522	14905	13428	2264	2377	8647
231	Positive	1.237	130.05978	5-OXO-L-PROLINE	[M+H]+	130.04987	C5H7NO3	Alpha amino acids and derivatives	ODHCTXKNWHHXJC-VKHMYHEASA-N	C1CC(=O)N[C@@H]1C(=O)O	2010	2396	1895	1960	3606	3540	2421	3152	3749	3639	2503	2499	1730	1811	614	6770	12858	13890	21410	18568	17232	16825	15588	15074	2198	2196	1292	1923	3395	2511	4743	19951	16598	16360	14905	13665	3416	5966	16289
232	Positive	1.246	130.08665	PIPECOLIC ACID	[M+H]+	130.08626	C6H11NO2	Alpha amino acids	HXEACLLIILLPRG-UHFFFAOYSA-N	C1CCNC(C1)C(=O)O	522	561	2494	2409	498	2168	504	658	529	621	2599	760	896	802	189	14631	3004	3952	3986	3256	3058	2846	2835	2503	2313	579	655	938	689	668	212	4445	3986	4438	2819	3032	17779	13914	4388
233	Positive	0.959	130.09526	PIPECOLIC ACID	[M+H]+	130.08626	C6H11NO2	Alpha amino acids	HXEACLLIILLPRG-UHFFFAOYSA-N	C1CCNC(C1)C(=O)O	1651	1604	2021	1943	2225	2112	1736	1559	1656	1601	2468	2449	2192	2074	2905	1075	3419	6994	9126	8431	7152	5334	5132	4642	2122	2065	3052	1688	1424	1463	3005	4598	6152	5327	6600	4549	1732	2245	5846
234	Positive	0.907	130.09540	Pipecolic acid	[M+H]+	130.08626	C6H11NO2	Alpha amino acids	HXEACLLIILLPRG-UHFFFAOYSA-N	O=C(O)C1NCCCC1	270	388	323	106	306	340	385	422	349	384	493	108	369	111	1610	1075	3419	6833	9126	8224	7152	5334	5121	4642	132	294	115	318	344	332	1624	4598	6152	5297	6565	4538	1572	3187	5770
235	Positive	0.783	130.09598	Pipecolic acid	[M+H]+	130.08626	C6H11NO2	Alpha amino acids	HXEACLLIILLPRG-UHFFFAOYSA-N	O=C(O)C1NCCCC1	125	71	76	102	128	91	82	68	89	102	64	98	118	111	8361	85	133	202	88	69	130	120	210	163	136	96	125	116	90	113	14062	92	181	166	181	118	156	72	199
236	Positive	9.195	130.12280	Unknown	[M+H]+	null	null	null	null	null	414	514	419	593	200	300	380	113	516	328	573	611	618	773	2598	3147	1380	969	844	821	891	762	1013	696	260	233	660	468	673	667	580	809	1130	804	736	953	3018	3077	1191
237	Positive	6.350	130.17052	low score: Octylamine	[M+H]+	130.15903	C8H19N	Monoalkylamines	IOQPZZOEVPZRBK-UHFFFAOYSA-N	CCCCCCCCN	2896	2913	3136	3121	3215	3204	3092	3308	3033	3114	3115	3051	2791	2540	94	116	189	162	167	160	134	199	199	572	3195	2968	2688	2785	2776	2812	107	133	198	168	191	197	77	78	296
238	Positive	0.452	130.96568	Unknown	[M+H]+	null	null	null	null	null	8	13	0	2	15	16	8	6	12	6	7	6	18	7	265	1163	3044	3428	4832	4802	4704	4722	7438	6384	11	6	0	21	8	19	975	2740	4907	4984	4631	4936	1929	1896	4327
239	Positive	0.762	130.97534	Unknown	[M+H]+	null	null	null	null	null	34	63	16	49	58	26	26	70	63	51	30	25	50	32	292	912	13992	14838	14331	14530	14101	15327	14369	15289	66	34	64	38	39	48	2369	12820	15649	13589	16043	15622	616	1062	15373
240	Positive	1.143	131.04863	no MS2: TRANS-CINNAMATE	[M+H-2H2O]+	131.04913	C9H8O2	Cinnamic acids	WBYWAXJHAXSJNI-VOTSOKGWSA-N	OC(=O)\C=C\C1=CC=CC=C1	27	43	45	27	33	65	51	37	27	40	40	51	86	109	1424	258	317	357	457	411	357	292	431	437	70	66	131	53	73	89	123	455	476	318	244	348	210	180	452
241	Positive	6.732	131.05995	low score: Quinoxaline	[M+H]+	131.06038	C8H6N2	Quinoxalines	XSCHRSMBECNVNS-UHFFFAOYSA-N	C1=CC=C2N=CC=NC2=C1	36	13	17	20	11	11	18	13	33	14	13	42	23	21	107	85	52	67	58	27	130	74	106	104	40	29	47	13	11	8	1260	73	66	6	122	111	116	81	78
242	Positive	1.433	131.10783	Unknown	[M+H]+	null	null	null	null	null	491	465	480	537	377	386	339	382	548	434	611	651	657	906	1075	1420	1172	951	1282	1218	1099	1178	1119	984	419	326	623	697	696	947	699	1068	1248	1152	900	902	1264	1299	1146
243	Positive	0.567	131.11449	no MS2: N-ACETYLPUTRESCINE	[M+H]+	131.11789	C6H14N2O	Carboximidic acids	KLZGKIDSEJWEDW-UHFFFAOYSA-N	CC(=O)NCCCCN	1291	1117	1138	1235	1168	1428	1235	1110	1280	1161	1252	1217	1288	1405	1109	1273	1312	1193	1300	1224	1437	1308	1206	1304	1278	1452	1544	1281	1319	1297	880	1250	1275	1384	1552	1344	1095	1034	1235
244	Positive	1.297	131.11768	no MS2: N-ACETYLPUTRESCINE	[M+H]+	131.11789	C6H14N2O	Carboximidic acids	KLZGKIDSEJWEDW-UHFFFAOYSA-N	CC(=O)NCCCCN	1597	1297	1249	1367	1357	1016	1365	1390	1471	1428	1330	1327	1435	1196	589	748	1623	1348	1423	1392	1372	1481	1387	1405	1499	1387	1098	1355	1418	1353	1048	1239	1427	1030	1385	1432	690	334	1267
245	Positive	1.709	131.93924	Unknown	[M+H]+	null	null	null	null	null	17	6	29	32	38	25	30	17	16	46	33	21	19	22	743	2816	17530	20191	25403	24687	23289	24905	25092	24458	14	26	53	28	18	24	8538	17743	23693	26132	24312	24870	5783	8083	22397
246	Positive	0.554	131.93932	Unknown	[M+H]+	null	null	null	null	null	10	6	18	18	0	19	6	6	6	0	14	0	7	18	47	177	32396	36383	54541	55398	58191	61047	62803	63246	12	14	0	8	6	3	9882	42373	43774	49031	59321	61691	267	374	38237
247	Positive	1.807	131.93944	Unknown	[M+H]+	null	null	null	null	null	0	8	27	14	22	25	30	17	22	24	33	18	10	21	534	2828	17373	20155	25403	24396	23680	24791	25097	24485	27	26	36	14	22	28	8517	17317	23644	26132	22969	22853	3364	4205	23540
248	Positive	0.633	131.93956	Unknown	[M+H]+	null	null	null	null	null	10	6	18	10	10	19	6	4	6	0	16	5	5	5	48	186	30699	36376	54529	55398	58191	61047	62954	63405	1	14	1	8	6	13	10000	39586	43796	49039	60222	62281	252	299	38221
249	Positive	6.382	131.93964	Unknown	[M+H]+	null	null	null	null	null	10	8	5	5	13	16	0	21	0	0	11	10	15	12	56	104	7525	7213	6351	6848	6414	6623	6500	6499	6	2	10	13	6	0	9906	8703	7315	7123	6192	6342	144	162	7880
250	Positive	0.373	131.96159	Unknown	[M+H]+	null	null	null	null	null	7	0	15	0	16	17	8	17	7	30	4	18	20	16	52	478	394	377	685	659	376	714	1149	1156	7	16	21	16	11	4	512	854	586	644	70	46	1204	1393	68
251	Positive	0.913	132.07648	CREATINE	[M+H]+	132.07675	C4H9N3O2	Alpha amino acids and derivatives	CVSVTCORWBXHQV-UHFFFAOYSA-N	CN(CC(=O)O)C(=N)N	21	159	221	19	16	244	346	249	115	162	202	207	408	404	34672	8890	2554	1094	1670	1922	1605	1859	2751	2402	234	23	22	447	234	301	29943	2614	1407	2633	2851	3040	5370	4024	2948
252	Positive	1.193	132.08542	CREATINE	[M+H]+	132.07675	C4H9N3O2	Alpha amino acids and derivatives	CVSVTCORWBXHQV-UHFFFAOYSA-N	CN(CC(=O)O)C(=N)N	22330	22866	15033	16594	20904	20191	24647	24865	18508	17535	22638	21027	13387	13387	217	24795	29691	31059	35362	33744	14505	20075	14860	13924	14846	13734	13285	7266	9512	9845	221	29467	28217	33500	36446	33080	11288	12956	30885
253	Positive	1.131	132.08549	CREATINE	[M+H]+	132.07675	C4H9N3O2	Alpha amino acids and derivatives	CVSVTCORWBXHQV-UHFFFAOYSA-N	CN(CC(=O)O)C(=N)N	20653	21377	14353	15904	19309	18624	22356	23238	17253	16660	21322	19747	11406	13077	367	9744	29713	31129	35338	34169	21571	20068	24856	26053	13911	12459	12980	7172	9366	9685	232	29310	28199	33997	36712	33165	14185	9609	30432
254	Positive	1.438	132.10057	Isoleucine	[M+H]+	132.10190	C6H13NO2	Isoleucine and derivatives	AGPKZVBTJJNPAG-UHFFFAOYSA-N	CCC(C)C(C(=O)O)N	1402	1008	630	591	1014	1533	1218	1286	939	775	1065	845	385	525	7385	1063	215	291	403	323	287	304	333	306	1134	971	135	253	138	254	752	353	301	342	326	319	816	738	285
255	Positive	1.150	132.11168	ISOLEUCINE	[M+H]+	132.10190	C6H13NO2	Isoleucine and derivatives	AGPKZVBTJJNPAG-WHFBIAKZSA-N	CC[C@H](C)[C@@H](C(=O)O)N	4033	4039	3906	4256	3915	4132	3999	3918	3772	3640	4176	4517	3194	3359	53557	3074	19308	17314	21959	22821	24619	23779	28243	27055	3994	3830	4696	2920	2487	2486	86255	27357	23794	22070	18204	18058	3107	5176	14879
256	Positive	0.536	132.94144	Unknown	[M+H]+	null	null	null	null	null	11	8	0	14	0	2	6	12	6	8	11	7	7	0	32	74	2005	2291	3050	3049	3039	3051	3446	3316	9	6	7	20	13	6	652	2669	2669	2928	3448	3207	165	181	2289
257	Positive	1.168	133.04103	Unknown	[M+H]+	null	null	null	null	null	112	98	188	134	122	132	158	152	116	119	134	143	95	133	10158	212	2104	1646	1773	2087	1934	1564	2321	2190	147	225	446	110	108	108	12304	2222	2540	2380	2000	1954	202	254	1537
258	Positive	1.275	133.09726	no MS2: L-ORNITHINE	[M+H]+	133.09715	C5H12N2O2	L-alpha-amino acids	AHLPHDHHMVZTML-BYPYZUCNSA-N	C(C[C@@H](C(=O)O)N)CN	1224	1303	845	979	1117	1085	1297	1269	998	1062	1208	1206	617	675	444	2969	1676	1215	1197	980	1233	1426	1771	1773	820	767	310	524	553	392	195	2042	1837	1688	694	1541	1225	1410	1389
259	Positive	0.790	133.10632	no MS2: Unknown (carbon number 10); PlaSMA ID-104	[M+H]+	133.10181	C10H12	Unknown	null	null	140	151	154	144	177	148	159	105	183	166	135	145	246	214	769	290	267	244	456	358	341	460	367	214	118	131	190	144	153	235	1859	511	444	333	379	397	300	328	407
260	Positive	1.194	133.11575	no MS2: Unknown (carbon number 10); PlaSMA ID-104	[M+H]+	133.10181	C10H12	Unknown	null	null	442	367	608	479	486	557	432	499	476	459	509	573	483	416	3755	149	1793	1330	1816	1929	2462	1981	2615	2875	491	524	509	435	320	376	7559	3262	2360	2740	1565	1679	174	153	1423
261	Positive	1.700	133.93527	Unknown	[M+H]+	null	null	null	null	null	24	24	15	5	26	18	22	14	20	20	19	16	24	14	375	1392	7173	7603	10152	9504	9411	9422	9558	9494	27	9	18	5	18	17	3013	6850	8981	9987	9387	10075	2279	2367	8749
262	Positive	1.839	133.93636	Unknown	[M+H]+	null	null	null	null	null	32	6	33	21	25	23	16	14	16	13	15	16	11	11	280	1206	6287	7591	8978	9790	9411	9643	8630	9072	14	7	29	18	16	15	3157	6911	8138	10108	8652	8879	1474	1961	9280
263	Positive	0.473	133.93869	Unknown	[M+H]+	null	null	null	null	null	6	9	6	18	10	9	0	0	6	6	6	12	0	6	21	44	22960	26382	28476	30240	31106	31682	37341	37238	10	15	6	6	7	9	4339	28193	29369	32395	32906	31321	120	114	28186
264	Positive	0.885	134.02748	no MS2: Thiazolidine-4-carboxylic acid	[M+H]+	134.02702	C4H7NO2S	L-alpha-amino acids	DZLNHFMRPBPULJ-UHFFFAOYSA-N	O=C(O)C1NCSC1	6	59	40	9	25	46	8	14	28	44	67	15	25	21	520	87	76	8	35	141	45	50	188	93	36	25	4	24	25	8	2446	225	27	150	285	318	99	96	32
265	Positive	1.067	134.02867	no MS2: Thiazolidine-4-carboxylic acid	[M+H]+	134.02702	C4H7NO2S	L-alpha-amino acids	DZLNHFMRPBPULJ-UHFFFAOYSA-N	O=C(O)C1NCSC1	1115	1035	1066	1213	1196	1128	804	764	857	1020	1407	1457	1041	1115	547	1450	2967	3410	2552	3601	2301	3485	3314	3134	1423	1431	1120	1002	972	887	95	4664	3737	3648	5467	5138	1275	469	2367
266	Positive	1.083	135.01375	Unknown	[M+H]+	null	null	null	null	null	18139	17585	17100	16902	16502	16984	11755	11535	13345	14169	11371	11484	21890	22629	141	35616	59905	63006	45988	44880	69066	70617	58611	59010	25420	25768	16552	20964	16039	15555	102	83135	69798	67061	68750	68023	29803	29731	44724
267	Positive	1.565	135.11795	CAMPHOR (1R)	[M-H2O+H]+	135.11682	C10H16O	Bicyclic monoterpenoids	DSSYKIVIOFKYAU-XCBNKYQSSA-N	O=C1CC2CCC1(C)C2(C)C	5037	4021	3900	3775	4098	4420	4663	4419	4549	5240	4650	4506	6927	6463	10209	10911	11536	10698	10291	9641	11031	11486	10323	9985	4735	9335	7027	6757	5719	5769	6944	10486	10929	11273	11066	10869	11570	11889	10746
268	Positive	0.067	135.12520	CAMPHOR (1R)	[M-H2O+H]+	135.11682	C10H16O	Bicyclic monoterpenoids	DSSYKIVIOFKYAU-XCBNKYQSSA-N	O=C1CC2CCC1(C)C2(C)C	11452	11546	11885	10838	10619	11248	10663	10929	11013	12421	11567	11089	11189	11314	8350	11118	17487	19583	22023	20974	21207	20705	22751	22359	11068	11677	10265	10714	11928	11894	8249	15052	21488	20682	21244	23022	11140	7881	19394
269	Positive	1.804	135.12556	CAMPHOR (1R)	[M-H2O+H]+	135.11682	C10H16O	Bicyclic monoterpenoids	DSSYKIVIOFKYAU-XCBNKYQSSA-N	O=C1CC2CCC1(C)C2(C)C	8471	8338	7921	8039	8096	8915	8630	8428	8162	8356	8656	8479	7966	8231	7818	7216	10444	11153	10608	10145	11815	10861	10749	10579	8696	8426	7351	7505	7717	7915	7463	10744	10786	10114	10772	9943	9051	8185	10959
270	Positive	6.538	135.12573	no MS2: CAMPHOR (1R)	[M-H2O+H]+	135.11682	C10H16O	Bicyclic monoterpenoids	DSSYKIVIOFKYAU-XCBNKYQSSA-N	O=C1CC2CCC1(C)C2(C)C	8700	8363	8419	8368	8906	8333	8490	8195	8392	8370	8534	8204	8330	8009	6332	8031	10450	10594	11018	10950	10819	10843	11433	10748	9249	8628	8508	7990	8366	8081	11303	10647	11129	10899	11113	10907	8728	9248	10473
271	Positive	1.389	135.12614	CAMPHOR (1R)	[M-H2O+H]+	135.11682	C10H16O	Bicyclic monoterpenoids	DSSYKIVIOFKYAU-XCBNKYQSSA-N	O=C1CC2CCC1(C)C2(C)C	9325	8631	8694	8840	8335	9048	8705	9106	8812	9147	8664	8903	8387	8564	6256	7576	11706	11128	11853	12116	11938	11720	12001	11879	8757	8697	7993	8286	8738	9343	6969	11065	11953	12409	11670	11644	5761	8434	11748
272	Positive	6.447	135.12656	no MS2: CAMPHOR (1R)	[M-H2O+H]+	135.11682	C10H16O	Bicyclic monoterpenoids	DSSYKIVIOFKYAU-XCBNKYQSSA-N	O=C1CC2CCC1(C)C2(C)C	8418	8348	8645	8569	8643	8263	8544	8156	8970	8594	8720	8542	7491	8009	5685	5918	10527	10393	9776	10504	11158	11108	11484	10696	8899	8584	7663	7707	8444	8090	11111	10846	11025	10682	11127	10926	7210	6641	10124
273	Positive	0.532	135.12660	no MS2: CAMPHOR (1R)	[M-H2O+H]+	135.11682	C10H16O	Bicyclic monoterpenoids	DSSYKIVIOFKYAU-XCBNKYQSSA-N	O=C1CC2CCC1(C)C2(C)C	9599	8562	9264	8835	8287	9281	9055	9099	9304	9241	9280	8997	8943	9195	5857	7033	10918	11672	12959	11714	11846	12141	11865	12136	8791	9244	8509	8402	9048	9278	7518	11638	12537	11996	11705	12020	6054	6158	12390
274	Positive	0.648	135.12694	no MS2: CAMPHOR (1R)	[M-H2O+H]+	135.11682	C10H16O	Bicyclic monoterpenoids	DSSYKIVIOFKYAU-XCBNKYQSSA-N	O=C1CC2CCC1(C)C2(C)C	8890	8540	9015	8365	8517	8888	8611	8596	8311	8294	8882	8193	8823	8438	5919	5227	10436	11016	10836	11602	10496	10354	11628	10627	8575	9199	8160	8595	8913	8338	7065	10150	11007	11343	11354	11146	6618	5749	11138
275	Positive	2.075	135.13022	Unknown	[M+H]+	null	null	null	null	null	7785	7467	7820	7981	7871	7813	8005	7804	7353	7991	7904	7894	7390	7785	2469	1674	7934	7962	8724	8805	9568	8639	8606	8679	7602	7718	6928	7139	7535	7443	7545	7956	8515	8345	8384	8483	2688	2174	8501
276	Positive	0.450	135.93468	Unknown	[M+H]+	null	null	null	null	null	6	0	6	8	18	7	8	0	9	4	9	12	20	0	15	12	11030	12949	12177	13434	13878	14249	17839	17997	0	0	6	0	6	14	576	11939	15855	16940	14489	14837	26	19	14219
277	Positive	0.263	136.03017	no MS2: 2-Benzoxazolinone; CE0; ASSKVPFEZFQQNQ-UHFFFAOYSA-N	[M+H]+	136.03931	C7H5NO2	Benzoxazolones	ASSKVPFEZFQQNQ-UHFFFAOYSA-N	c1ccc2c(c1)nc(O)o2	1805	1820	1972	2023	1737	1714	1828	1681	1851	1751	1796	1750	2245	2231	1575	3101	9546	10258	10887	11456	12017	10982	11647	11812	1601	1700	2072	1993	2310	2148	1365	8738	10568	10629	10882	11616	4186	4617	10246
278	Positive	0.044	136.03123	no MS2: 2-Benzoxazolinone; CE0; ASSKVPFEZFQQNQ-UHFFFAOYSA-N	[M+H]+	136.03931	C7H5NO2	Benzoxazolones	ASSKVPFEZFQQNQ-UHFFFAOYSA-N	c1ccc2c(c1)nc(O)o2	2277	1949	2025	1760	2058	1911	1925	1693	1817	1995	1821	2158	2422	2874	1126	2748	8656	9323	10064	9542	9603	9686	10814	10621	1961	2107	2204	2150	2100	2313	1586	8430	9527	9048	10569	10363	3022	6322	8959
279	Positive	14.557	136.03165	Benzothiazole	[M+H]+	136.02155	C7H5NS	Benzothiazoles	IOJUPLGTWVMSFF-UHFFFAOYSA-N	N1=CSC=2C=CC=CC12	1582	1511	1593	1426	1558	1358	1531	1520	1539	1530	1494	1450	1709	1961	1760	2009	12778	13897	11065	10320	12629	14498	13594	10990	1605	1527	1655	1714	1738	1685	8889	8408	14893	12573	14187	10641	2534	5946	10312
280	Positive	14.335	136.03241	no MS2: 2-Benzoxazolinone; CE0; ASSKVPFEZFQQNQ-UHFFFAOYSA-N	[M+H]+	136.03931	C7H5NO2	Benzoxazolones	ASSKVPFEZFQQNQ-UHFFFAOYSA-N	c1ccc2c(c1)nc(O)o2	1457	1526	1590	1517	1452	1536	1500	1561	1561	1518	1468	1468	1558	1646	960	1247	9688	10063	8619	9192	10980	10889	11439	10398	1498	1536	1625	1851	1546	1634	8020	8484	12653	10774	11061	9478	1635	5850	10062
281	Positive	14.850	136.03381	no MS2: 2-Benzoxazolinone; CE0; ASSKVPFEZFQQNQ-UHFFFAOYSA-N	[M+H]+	136.03931	C7H5NO2	Benzoxazolones	ASSKVPFEZFQQNQ-UHFFFAOYSA-N	c1ccc2c(c1)nc(O)o2	1506	1754	1669	1655	1683	1724	1584	1501	1487	1516	1688	1465	1731	1893	1032	1286	14401	15526	12570	12294	14629	16067	15095	13024	1632	1559	1637	1663	1800	1909	11073	9784	15155	14331	16155	14633	1871	3625	13248
282	Positive	1.172	136.04663	no MS2: CREATININE	[M+Na]+	136.04813	C4H7N3O	Alpha amino acids and derivatives	DDRJAANPRJIHGJ-UHFFFAOYSA-N	CN1CC(=O)N=C1N	604	475	556	671	492	586	590	429	403	550	611	552	701	400	280	2362	1091	988	1555	1585	859	1151	761	1047	666	601	450	646	874	815	558	1050	1308	1009	876	838	2719	2317	832
283	Positive	1.073	136.06058	no MS2: METHYLMALONATE	[M+NH4]+	136.06044	C4H6O4	Dicarboxylic acids and derivatives	ZIYVHBGGAOATLY-UHFFFAOYSA-N	CC(C(=O)O)C(=O)O	4455	4361	3178	3172	4069	4056	4385	4128	3820	4034	4107	4048	2986	3144	647	435	2608	3129	4191	4281	2661	2677	2711	3493	3002	3036	1563	2273	2751	2865	242	3217	3707	2896	2595	3147	611	806	3092
284	Positive	0.838	136.08197	no MS2: 3`-Aminoacetophenone	[M+H]+	136.07568	C8H9NO	Alkyl-phenylketones	CKQHAYFOPRIUOM-UHFFFAOYSA-N	CC(=O)C1=CC(N)=CC=C1	21	21	24	31	22	39	31	47	33	29	42	51	49	41	390	109	103	168	79	168	206	270	172	118	40	46	29	47	36	50	12401	603	134	203	229	611	780	148	143
285	Positive	1.121	136.08656	Unknown	[M+H]+	null	null	null	null	null	602	494	738	765	690	648	606	592	915	894	651	673	753	670	9456	282	21419	22015	20598	21402	20660	21019	19413	21247	696	814	993	527	963	931	28331	21373	22241	21908	20899	21160	325	336	21742
286	Positive	1.700	136.94188	Unknown	[M+H]+	null	null	null	null	null	54	59	43	59	69	56	89	58	42	72	53	60	68	41	66	292	1268	1054	990	999	1161	1204	1161	1046	65	45	48	75	22	36	344	1854	1004	862	1057	1333	435	343	987
287	Positive	1.380	137.04642	no MS2: Hypoxanthine; CE0; FDGQSTZJBFJUBT-UHFFFAOYSA-N	[M+H]+	137.04579	C5H4N4O	Hypoxanthines	FDGQSTZJBFJUBT-UHFFFAOYSA-N	c1nc2c([nH]1)ncnc2O	143	109	126	129	111	65	66	62	103	105	120	155	119	65	76	48	104	142	134	188	131	139	286	214	98	122	82	83	78	51	91	48	51	125	186	164	1407	1323	512
288	Positive	1.259	137.05435	no MS2: Bovinocidin (3-Nitropropionic Acid)	[M+NH4]+	137.05568	C3H5NO4	C-nitro compounds	WBLZUCOIBUDNBV-UHFFFAOYSA-N	O=C(O)CCN(=O)=O	301	347	36	18	25	35	47	28	58	70	979	637	27	36	210	171	52	273	435	336	100	74	909	745	23	36	78	21	26	15	256	205	222	131	850	655	461	578	2288
289	Positive	1.140	137.05713	no MS2: 2-Hydroxyacetophenone	[M+H]+	137.05971	C8H8O2	Alkyl-phenylketones	ZWVHTXAYIKBMEE-UHFFFAOYSA-N	O=C(C=1C=CC=CC1)CO	762	846	139	186	176	202	174	166	267	284	1088	1244	192	206	492	166	215	261	460	296	282	154	982	777	156	170	115	119	175	153	325	256	302	246	899	655	282	194	627
290	Positive	1.406	137.14122	Chrysanthemyl Alcohol	[M-H2O+H]+	137.13248	C10H18O	Monocyclic monoterpenoids	HIPIENNKVJCMAP-DTWKUNHWSA-N	OCC1C(C=C(C)C)C1(C)C	15006	13527	13932	12500	13716	14068	12926	13014	13957	13197	14133	12888	14491	13849	12440	11873	19576	18917	18461	19311	17785	19169	19216	19061	14722	13658	13160	13572	13887	14076	13796	19008	20133	20016	18983	18409	12473	17383	19621
291	Positive	0.639	137.14131	no MS2: Limonene	[M+H]+	137.13248	C10H16	Menthane monoterpenoids	XMGQYMWWDOXHJM-UHFFFAOYSA-N	C=C(C)C1CC=C(C)CC1	13267	12905	12202	12239	12983	13151	13090	12740	12703	13140	13113	13448	13827	13668	11985	12380	18038	19517	17643	16837	20201	17660	17876	18113	13147	12682	13913	13323	13853	13291	13647	18267	18829	17669	17880	19285	12158	10897	18884
292	Positive	1.511	137.14177	Chrysanthemyl Alcohol	[M-H2O+H]+	137.13248	C10H18O	Monocyclic monoterpenoids	HIPIENNKVJCMAP-DTWKUNHWSA-N	OCC1C(C=C(C)C)C1(C)C	13425	13172	12745	13160	12973	14918	12899	12619	12441	12808	13456	13691	13069	13762	11932	9645	18822	18965	18084	19509	18683	18876	18968	18558	13267	14368	12970	12902	14130	14105	13934	19081	20116	18774	18952	19037	12473	11377	19072
293	Positive	1.119	137.14195	Chrysanthemyl Alcohol	[M-H2O+H]+	137.13248	C10H18O	Monocyclic monoterpenoids	HIPIENNKVJCMAP-DTWKUNHWSA-N	OCC1C(C=C(C)C)C1(C)C	9679	8739	9666	9472	9451	9593	9732	9452	9160	9672	9110	9386	10276	11473	10997	3366	1812	2665	2063	2141	2418	1828	2834	2805	9888	10197	8570	9922	10305	10266	13296	1843	1861	1988	2753	2859	3484	2914	2268
294	Positive	6.988	137.14198	no MS2: Limonene	[M+H]+	137.13248	C10H16	Menthane monoterpenoids	XMGQYMWWDOXHJM-UHFFFAOYSA-N	C=C(C)C1CC=C(C)CC1	13113	12692	13358	14128	13331	12858	13351	13042	13164	13487	13352	13514	13104	13316	7971	11244	18243	19104	17947	17701	18262	18511	18526	17895	13750	12790	13228	12294	13488	13645	20979	19281	18982	18308	18038	18520	13054	11944	19396
295	Positive	6.478	137.14209	no MS2: Limonene	[M+H]+	137.13248	C10H16	Menthane monoterpenoids	XMGQYMWWDOXHJM-UHFFFAOYSA-N	C=C(C)C1CC=C(C)CC1	13645	12526	13313	13262	13135	12773	12181	12845	12876	12816	13217	13203	13376	13288	7928	10817	19090	18712	18204	16974	18310	18014	18245	17089	13334	13202	12140	11601	13864	12971	20839	19003	18911	18087	17152	17841	10594	12121	19372
296	Positive	0.514	137.14221	Chrysanthemyl Alcohol	[M-H2O+H]+	137.13248	C10H18O	Monocyclic monoterpenoids	HIPIENNKVJCMAP-DTWKUNHWSA-N	OCC1C(C=C(C)C)C1(C)C	14329	13361	13425	13869	13312	13965	13944	13401	14216	13608	14552	13511	14455	15278	10050	9580	19249	20304	20143	19298	19147	19703	19962	20060	13910	14460	14084	14048	14707	15386	14069	20184	20520	19509	19830	19633	11154	11197	20373
297	Positive	14.826	137.14252	no MS2: Limonene	[M+H]+	137.13248	C10H16	Menthane monoterpenoids	XMGQYMWWDOXHJM-UHFFFAOYSA-N	C=C(C)C1CC=C(C)CC1	17222	16948	16359	17479	17685	17088	16657	16798	15987	18032	16447	17425	16716	17409	10532	11673	19309	20458	21819	21637	22150	22801	23380	21768	17621	17617	15923	15927	17737	18028	15520	18543	22754	22422	22945	23197	8568	34718	22526
298	Positive	15.479	137.14255	Unknown	[M+H]+	null	null	null	null	null	16556	17949	15939	17695	17357	18001	18113	17196	16793	16726	18096	18334	18251	17484	11584	13126	24479	26451	26615	25722	25997	26749	26477	26705	17657	16593	15887	15910	17923	17511	20946	23821	27088	26237	27347	26294	8463	35961	25647
299	Positive	0.063	137.14284	Chrysanthemyl Alcohol	[M-H2O+H]+	137.13248	C10H18O	Monocyclic monoterpenoids	HIPIENNKVJCMAP-DTWKUNHWSA-N	OCC1C(C=C(C)C)C1(C)C	19511	18534	18305	17289	17684	18695	19255	18622	17722	19465	18981	18495	20134	19556	8936	11646	33974	34781	34170	32167	33672	33743	33969	33981	18497	20302	17343	18981	19514	20072	15018	29502	37282	35000	35361	34563	10343	7511	36201
300	Positive	1.326	137.14316	Unknown	[M+H]+	null	null	null	null	null	14683	14148	13590	13680	12788	13156	13459	14245	14660	13583	13825	13910	14409	14140	8797	7446	19890	19255	19031	18137	17923	19156	18434	19453	14217	14285	13132	13778	14178	14317	13787	17588	19203	20163	18950	18753	5736	5330	19616
301	Positive	15.021	137.14369	Chrysanthemyl Alcohol	[M-H2O+H]+	137.13248	C10H18O	Monocyclic monoterpenoids	HIPIENNKVJCMAP-DTWKUNHWSA-N	OCC1C(C=C(C)C)C1(C)C	17615	17444	16871	17334	17793	17739	17030	17606	17228	17457	17598	17369	17517	17877	7800	8671	22948	23112	24633	23309	25232	24204	24294	25110	18370	18216	16046	16431	16766	17303	16826	20086	25300	24085	25348	23168	7599	34878	22175
302	Positive	0.313	137.14626	Unknown	[M+H]+	null	null	null	null	null	19342	18732	17954	18240	17706	18159	18142	18410	18054	18144	18517	19056	19028	18165	3128	4127	18484	23412	26652	25800	26820	26263	25379	26543	18861	19122	16206	17521	17890	18777	14924	13795	26844	26357	27434	27595	2984	18142	25535
303	Positive	0.449	137.93227	Unknown	[M+H]+	null	null	null	null	null	13	8	7	17	14	7	12	6	0	13	0	8	9	0	14	8	3056	3359	3347	3641	3570	3590	4638	5015	6	6	6	6	26	6	248	3235	4049	4234	3753	3797	18	0	4217
304	Positive	0.502	137.97339	Unknown	[M+H]+	null	null	null	null	null	80	85	70	77	85	61	88	82	73	83	71	64	93	69	82	210	1760	1776	1978	1760	1811	1758	1776	1844	53	90	72	87	83	63	224	1642	1710	2087	1799	1753	393	561	1624
305	Positive	1.193	138.06314	no MS2: 2-Aminobenzoic acid; CE0; RWZYAGGXGHYGMB-UHFFFAOYSA-N	[M+H]+	138.05496	C7H7NO2	Aminobenzoic acids	RWZYAGGXGHYGMB-UHFFFAOYSA-N	c1ccc(c(c1)C(=O)O)N	1550	1779	2268	2377	2582	2403	2540	2466	2643	2561	4360	4610	3531	3755	66	3124	3637	2932	2723	2781	3395	3704	3450	3277	2034	1606	2563	1728	2687	2791	109	4498	4618	4114	4074	3846	400	134	924
306	Positive	0.924	138.06570	no MS2: Isonicotinate hydrazide	[M+Na]+	138.06619	C6H7N3O	Pyridinecarboxylic acids and derivatives	QRXWMOHMRWLFEY-UHFFFAOYSA-N	NNC(=O)c(c1)ccnc1	511	780	685	11	1019	1271	18	1063	898	676	4785	1004	1495	1565	3234	181	282	270	352	311	378	456	281	362	718	690	19	760	1179	676	4613	785	553	398	568	1214	78	51	392
307	Positive	1.123	138.06789	no MS2: Isonicotinate hydrazide	[M+H]+	138.06619	C6H7N3O	Pyridinecarboxylic acids and derivatives	QRXWMOHMRWLFEY-UHFFFAOYSA-N	NNC(=O)c(c1)ccnc1	1999	1895	2417	2570	3454	3455	2743	2601	2793	2705	4810	4956	3653	3930	77	380	3662	2952	1714	2858	3446	3769	3501	3310	2218	2388	2633	2365	2777	2826	92	4631	4747	4228	4231	3883	118	52	900
308	Positive	0.357	138.08920	no MS2: PHENYLETHANOLAMINE	[M+H]+	138.09134	C8H11NO	Aralkylamines	ULSIYEODSMZIPX-UHFFFAOYSA-N	C1=CC=C(C=C1)C(CN)O	58	40	41	56	44	52	29	23	53	43	34	47	54	60	42	1718	26	98	48	135	59	121	91	91	69	36	45	107	45	43	66	160	94	111	112	107	2196	3068	100
309	Positive	1.176	138.91478	Unknown	[M+H]+	null	null	null	null	null	754	780	810	901	704	732	417	418	850	622	633	707	446	919	5	222	1429	1213	992	954	1076	1317	1159	1231	401	845	635	699	394	730	13	436	1114	1428	1142	1461	497	356	957
310	Positive	0.615	138.97675	Unknown	[M+H]+	null	null	null	null	null	60	50	61	32	18	38	34	22	36	28	56	28	33	32	59	149	1411	1548	1432	1482	1440	1326	1444	1640	34	36	25	65	22	42	266	1471	1370	1675	1123	1436	267	415	1439
311	Positive	0.452	138.98978	no MS2: Fumaric acid	[M+Na]+	139.00000	C4H4O4	Dicarboxylic acids and derivatives	VZCYOOQTPOCHFL-OWOJBTEDSA-N	O=C(O)C=CC(=O)O	37	47	68	82	51	52	55	67	58	46	39	50	48	23	20	112	1481	1705	2074	1801	1719	1984	2704	2454	19	48	51	40	61	66	176	1581	1658	2187	1786	1904	122	385	1705
312	Positive	1.029	139.04881	no MS2: Methyl pyrazine 2-carboxylate	[M+H]+	139.05020	C6H6N2O2	Pyrazine carboxylic acids	TWIIRMSFZNYMQE-UHFFFAOYSA-N	COC(=O)C1=CN=CC=N1	44	68	100	87	120	111	105	71	102	68	95	93	160	93	1661	180	71	75	81	154	90	133	59	122	81	50	126	142	152	132	1280	88	103	189	139	102	60	138	117
313	Positive	0.070	139.12086	low score: Isophorone	[M+H]+	139.11174	C9H14O	Cyclohexenones	HJOVHMDZYOCNQW-UHFFFAOYSA-N	CC1=CC(=O)CC(C)(C)C1	538	530	510	475	581	537	535	597	448	522	536	523	602	591	653	780	2900	3214	2725	3157	3004	3307	3073	3015	608	637	606	684	634	677	1313	2483	2845	2935	3288	3137	784	687	2935
314	Positive	1.463	139.12320	Unknown	[M+H]+	null	null	null	null	null	505	460	540	508	474	403	493	449	467	480	466	557	506	645	406	312	1820	1922	2086	1991	2206	2311	2240	2323	437	511	574	546	584	622	1369	1834	2180	1965	2287	2336	378	355	2042
315	Positive	12.590	139.15625	Unknown	[M+H]+	null	null	null	null	null	237	229	253	216	205	253	189	237	176	202	251	170	195	167	196	198	1051	985	983	1043	656	759	799	1083	235	205	239	233	237	242	555	479	948	859	644	683	154	165	770
316	Positive	0.449	139.93275	Unknown	[M+H]+	null	null	null	null	null	7	27	10	10	0	7	6	6	0	9	27	6	6	8	10	9	1634	1958	1764	1785	1780	1923	2467	2770	6	19	6	10	19	6	152	1727	1910	2252	2260	2224	0	30	2045
317	Positive	1.305	139.93289	Unknown	[M+H]+	null	null	null	null	null	0	16	0	10	16	0	5	10	12	11	8	12	0	9	29	6	1652	1607	1209	1445	1906	1520	1396	1365	6	6	5	15	5	11	136	1622	1520	1693	1282	1775	27	14	1872
318	Positive	0.444	139.96370	Unknown	[M+H]+	null	null	null	null	null	8	13	14	6	10	20	8	7	9	7	9	16	17	14	152	1160	210	348	321	326	492	218	515	556	14	14	0	6	5	14	276	439	337	449	359	371	1696	1508	350
319	Positive	0.428	139.99620	Unknown	[M+H]+	null	null	null	null	null	33	15	13	9	10	8	8	9	22	15	9	7	6	11	51	465	2332	3344	6260	6891	5314	5452	8526	8436	7	7	17	10	20	26	409	4850	7524	6887	5692	7372	878	939	4129
320	Positive	1.145	140.07779	betaine	[M+Na]+	140.07001	C5H11NO2	Alpha amino acids	KWIUHFFTVRNATP-UHFFFAOYSA-N	O=C([O-])C[N+](C)(C)C	39223	36453	35696	36267	37243	42420	33229	32536	26403	28464	44770	43636	38688	41098	42	27218	46440	62936	71583	71780	53280	55821	61430	59484	43707	44104	27599	41122	33774	34063	62	93911	95244	89284	84999	81758	23810	20326	46181
321	Positive	1.087	140.07863	betaine	[M+Na]+	140.07001	C5H11NO2	Alpha amino acids	KWIUHFFTVRNATP-UHFFFAOYSA-N	O=C([O-])C[N+](C)(C)C	40730	37722	38092	38448	39158	44346	34647	33360	27888	29194	47330	44689	38900	41630	126	15222	46972	63726	71636	72233	53882	56056	61918	59905	45472	46206	27723	41295	34513	34206	62	94890	96615	90522	85931	81996	13155	12024	46263
322	Positive	0.878	140.07887	betaine	[M+Na]+	140.07001	C5H11NO2	Alpha amino acids	KWIUHFFTVRNATP-UHFFFAOYSA-N	O=C([O-])C[N+](C)(C)C	9	510	861	22	1023	194	537	20	23	584	1930	362	1567	232	1531	774	562	29	23	445	31	453	661	29	1234	10	26	1082	280	492	12953	1160	590	651	842	1671	865	752	56
323	Positive	0.579	140.96094	Unknown	[M+H]+	null	null	null	null	null	32	20	45	26	8	24	18	16	22	16	12	13	23	16	206	805	3578	3820	4090	4322	4006	4081	4098	3917	9	25	27	8	8	23	705	4247	3874	4246	3706	3727	1276	2947	4314
324	Positive	0.483	140.96204	Unknown	[M+H]+	null	null	null	null	null	32	20	8	28	14	21	13	16	22	14	12	18	37	34	154	763	3639	3922	3974	4376	4121	4022	4137	3824	2	6	10	8	1	23	735	4191	4157	4305	3841	3712	1179	2088	4366
325	Positive	0.427	141.01036	low score: CYCLOSERINE	[M+K]+	141.00607	C3H6N2O2	Alpha amino acids and derivatives	DYDCUQKUCUHJBH-UWTATZPHSA-N	OC1=NOCC1N	24	37	22	36	35	15	34	23	38	46	56	39	61	57	104	70	1245	1410	3360	2877	2693	2618	4675	4023	33	62	62	12	65	57	242	1913	3153	3609	2638	3137	56	97	2234
326	Positive	0.767	141.01537	low score: CYCLOSERINE	[M+K]+	141.00607	C3H6N2O2	Alpha amino acids and derivatives	DYDCUQKUCUHJBH-UWTATZPHSA-N	OC1=NOCC1N	109	79	99	129	82	79	94	75	75	58	86	68	79	105	42	18	393	239	341	264	438	294	409	340	69	49	83	107	65	64	1078	326	227	346	289	383	47	42	224
327	Positive	0.449	141.95859	Unknown	[M+H]+	null	null	null	null	null	31	34	15	43	28	53	31	34	32	25	36	46	17	27	2221	18758	3023	3101	7159	7638	8311	8154	11735	10254	64	50	21	26	31	8	3393	4641	8635	10064	8069	7864	28650	23952	8287
328	Positive	0.718	141.96776	Unknown	[M+H]+	null	null	null	null	null	184	256	438	176	495	190	428	456	471	469	461	474	688	671	3536	7401	11714	13027	13840	15116	13814	13806	13783	12685	584	492	831	648	602	556	7614	16891	11885	13641	13876	13147	8109	9191	13342
329	Positive	0.792	141.96843	Unknown	[M+H]+	null	null	null	null	null	470	558	461	483	495	416	428	456	480	476	507	494	688	670	1623	5857	11925	12992	13915	15116	14138	13963	13783	12851	584	492	831	648	603	560	7614	17076	12933	13675	13990	13136	6150	7296	13360
330	Positive	0.432	141.99452	Unknown	[M+H]+	null	null	null	null	null	14	24	9	10	8	12	7	7	6	9	0	8	17	14	21	88	1216	1488	2642	2918	2364	2288	3286	3399	11	18	0	0	15	22	266	2189	2773	3098	2387	2805	202	243	1931
331	Positive	0.420	143.00185	Unknown	[M+H]+	null	null	null	null	null	7	0	9	0	8	15	29	0	7	6	20	9	7	0	55	238	593	754	1185	1389	1069	1275	1997	1910	9	16	15	6	12	6	90	1048	1398	1624	1106	1207	423	309	869
332	Positive	0.428	143.96864	Unknown	[M+H]+	null	null	null	null	null	2	22	20	8	14	8	8	0	16	0	1	8	11	21	75	1158	5347	5578	12819	10319	10687	9968	19767	16458	8	14	11	6	13	16	408	7427	13920	16769	10408	9096	1992	3087	8900
333	Positive	6.055	144.09270	no MS2: (2R)-6-methylpiperidine-2-carboxylic acid	[M+H]+	144.10001	C7H13NO2	L-alpha-amino acids	IHLDCUQUFBWSJU-PRJDIBJQSA-N	O=C(O)C1NC(C)CCC1	20	38	37	26	48	56	42	39	35	33	26	37	43	29	280	134	123	149	178	124	198	135	162	172	43	44	44	43	39	49	1203	187	168	157	118	159	112	108	103
334	Positive	1.172	144.11253	(2R)-6-methylpiperidine-2-carboxylic acid	[M+H]+	144.10001	C7H13NO2	L-alpha-amino acids	IHLDCUQUFBWSJU-PRJDIBJQSA-N	O=C(O)C1NC(C)CCC1	25109	24625	26963	27755	27636	26132	28076	25499	21558	20532	47311	46708	36020	37999	223	24127	56364	46197	25119	31329	35281	35454	34977	39661	25992	26726	48236	31304	38172	38954	861	56351	56782	53345	41420	38671	2175	1791	6400
335	Positive	0.947	144.11339	(2R)-6-methylpiperidine-2-carboxylic acid	[M+H]+	144.10001	C7H13NO2	L-alpha-amino acids	IHLDCUQUFBWSJU-PRJDIBJQSA-N	O=C(O)C1NC(C)CCC1	7770	10294	9512	8881	10554	11991	8089	11091	7702	6690	17260	11523	17669	17342	56336	1897	10841	3734	2867	3373	3632	4201	4680	4502	9401	9700	448	14677	18250	13660	97141	8593	5800	6651	4777	5783	219	206	1054
336	Positive	0.429	144.99104	Unknown	[M+H]+	null	null	null	null	null	26	14	8	7	24	11	11	0	18	18	7	31	21	6	34	458	1335	2056	2266	2257	1897	2363	3339	3449	9	38	28	21	18	12	103	2531	2799	2815	2284	2864	1790	2348	2018
337	Positive	0.970	145.06003	low score: 3-hydroxy-4-methoxy-2,3-dihydropyran-6-one	[M+H-H2O]+	145.04953	C6H8O4	Dihydropyranones	PBEXSRJMCVDBFK-UHFFFAOYSA-N	O=C1OCC(O)C(OC)=C1	437	528	451	483	559	582	472	470	496	460	558	456	713	498	2246	117	145	76	192	183	48	44	118	132	556	552	64	592	545	433	2295	119	155	82	111	239	53	132	142
338	Positive	1.162	145.06360	no MS2: 1-Naphthol	[M+2Na]2+	145.06479	C10H8O	Naphthols and derivatives	KJCVRFUGPWSIIH-UHFFFAOYSA-N	C1=CC=C2C(=C1)C=CC=C2O	989	901	958	962	1096	934	848	859	842	947	895	892	657	784	86	100	1048	246	796	812	623	643	594	794	961	1013	1316	763	831	756	580	856	550	672	623	766	90	66	947
339	Positive	0.823	145.93921	Unknown	[M+H]+	null	null	null	null	null	17	9	18	5	16	12	6	8	13	15	16	10	17	15	4	4	1404	1542	1459	1409	1372	1405	1184	1333	12	6	18	8	0	18	108	1406	1369	1424	1366	1359	61	106	1426
340	Positive	0.426	145.96454	Unknown	[M+H]+	null	null	null	null	null	6	8	9	0	16	0	17	9	7	8	12	3	0	11	30	253	2442	2190	4852	4127	4248	4001	8267	6395	13	13	6	10	0	7	294	3524	5707	6827	3914	3856	617	1351	3538
341	Positive	1.231	146.07008	no MS2: 5-methanesulfinylpentanenitrile; PlaSMA ID-182	[M+H]+	146.06380	C6H11NOS	Glucosinolate breakdown metabolites	FGYQUFZANKOISC-UHFFFAOYNA-N	N#CCCCCS(=O)C	338	340	600	572	367	446	480	405	423	514	380	423	469	472	27	425	1026	1111	396	1069	743	871	1348	1228	748	796	874	882	537	660	156	1747	1782	1775	964	913	199	211	1256
342	Positive	6.825	146.07068	low score: 5-methanesulfinylpentanenitrile; PlaSMA ID-182	[M+H]+	146.06380	C6H11NOS	Glucosinolate breakdown metabolites	FGYQUFZANKOISC-UHFFFAOYNA-N	N#CCCCCS(=O)C	17	12	7	6	23	28	8	25	6	10	15	6	7	13	531	26	49	36	53	23	28	58	43	14	22	24	27	30	18	17	5605	69	40	6	46	50	10	26	57
343	Positive	1.378	146.07126	low score: 5-methanesulfinylpentanenitrile; PlaSMA ID-182	[M+H]+	146.06380	C6H11NOS	Glucosinolate breakdown metabolites	FGYQUFZANKOISC-UHFFFAOYNA-N	N#CCCCCS(=O)C	37	93	79	102	86	64	79	73	89	110	89	69	48	64	38	119	130	79	541	196	171	160	170	201	113	113	1454	118	108	110	45	234	269	237	180	154	103	153	286
344	Positive	1.140	146.13011	low score: Lysinamide	[M+H]+	146.12878	C6H15N3O	Alpha amino acid amides	HKXLAGBDJVHRQG-YFKPBYRVSA-N	NCCCC[C@H](N)C(N)=O	2543	2509	3108	3184	3226	3207	1988	2083	2717	2655	4829	5203	2669	2703	74	504	1468	1545	1284	1257	1169	1357	2233	1983	2667	2758	3308	2435	2210	2038	311	2265	1459	946	2268	1918	332	315	748
345	Positive	0.778	146.94649	Unknown	[M+H]+	null	null	null	null	null	13	11	3	0	11	8	10	6	9	9	6	10	0	4	33	54	701	583	1085	931	1063	972	904	887	0	2	7	8	4	5	240	759	886	1028	905	888	179	299	681
346	Positive	0.401	146.98103	Unknown	[M+H]+	null	null	null	null	null	6	0	0	6	8	6	7	0	6	7	16	22	0	0	38	301	447	400	650	686	640	582	640	1255	13	22	6	2	17	8	121	482	822	758	449	852	1279	1168	667
347	Positive	1.143	147.05470	no MS2: Cumarin	[M+H-H2O]+	147.04405	C9H6O2	Coumarins and derivatives	ZYGHJZDHTFUPRJ-UHFFFAOYSA-N	O=C1OC2=CC=CC=C2C=C1	100	100	124	106	90	107	96	92	94	145	120	98	76	107	3808	71	498	128	630	394	81	539	487	522	91	167	178	102	144	94	5451	340	489	810	224	240	119	34	276
348	Positive	0.913	147.07674	GLUTAMINE	[M+H]+	147.07642	C5H10N2O3	Alpha amino acids	ZDXPYRJPNDTMRX-VKHMYHEASA-N	C(CC(=O)N)[C@@H](C(=O)O)N	41	29	61	74	85	47	46	65	59	58	68	68	67	90	6259	423	454	168	162	276	136	305	432	255	53	62	56	113	112	121	5018	289	300	277	213	175	436	460	200
349	Positive	1.208	147.08690	low score: 3-Trimethylsilylpropionic acid	[M+NH4]+	147.08359	C6H14O2Si	Carboxylic acids	NONFLFDSOSZQHR-UHFFFAOYSA-N	O=C(O)CC[Si](C)(C)C	1111	1112	1072	1170	1242	1355	1047	1158	1379	1459	957	1038	833	850	142	2775	4563	4811	8348	6524	5973	5907	5528	5085	1142	860	1142	805	1278	1256	341	7229	6269	5542	4792	4790	1986	2247	6672
350	Positive	1.236	147.11266	LYSINE	[M+H]+	147.11281	C6H14N2O2	D-alpha-amino acids	KDXKERNSBIXSRK-YFKPBYRVSA-N	C(CCN)C[C@@H](C(=O)O)N	1316	1261	1762	1681	1639	1946	1312	1322	140	212	1788	1864	1388	1432	250	13063	2070	2165	2444	2045	2258	2096	2114	1642	1738	1874	213	408	353	372	130	6103	2379	2206	1539	1977	14615	11622	6493
351	Positive	0.783	147.12352	no MS2: L-LYSINE	[M+NH4]+	147.11281	C6H14N2O2	D-alpha-amino acids	KDXKERNSBIXSRK-YFKPBYRVSA-N	C(CCN)C[C@@H](C(=O)O)N	135	160	114	145	124	131	110	119	163	127	141	113	114	114	5219	79	292	259	263	175	196	200	248	264	130	107	104	68	86	136	11336	181	316	328	287	168	148	133	222
352	Positive	0.919	147.12416	LYSINE	[M+H]+	147.11281	C6H14N2O2	D-alpha-amino acids	KDXKERNSBIXSRK-YFKPBYRVSA-N	C(CCN)C[C@@H](C(=O)O)N	367	272	413	391	472	131	272	266	410	292	325	390	1282	468	447	443	2451	5670	7546	7000	6362	3564	4090	3678	130	471	107	380	240	267	1353	3275	4531	4036	4812	3179	1741	2328	4766
353	Positive	0.402	147.96204	Unknown	[M+H]+	null	null	null	null	null	8	11	6	16	8	6	9	0	0	14	8	0	0	11	25	33	414	220	680	605	700	660	1411	1090	0	0	0	6	8	0	106	512	720	804	436	345	82	116	684
354	Positive	0.913	148.00381	no MS2: TAURINE	[M+Na]+	148.00389	C2H7NO3S	Organosulfonic acids	XOAAWQZATWQOTB-UHFFFAOYSA-N	NCCS(O)(=O)=O	10	12	26	12	5	14	13	26	11	16	12	10	7	30	4364	731	145	87	56	57	59	155	241	209	17	13	16	57	4	20	2780	185	76	112	88	389	648	332	53
355	Positive	1.138	148.01286	no MS2: TAURINE	[M+Na]+	148.00389	C2H7NO3S	Organosulfonic acids	XOAAWQZATWQOTB-UHFFFAOYSA-N	NCCS(O)(=O)=O	770	719	906	834	1041	890	769	796	866	861	448	492	952	966	7	1171	3174	2883	3588	3323	2720	2326	3374	3574	1502	1216	1004	1089	550	504	13	2994	2515	2179	3077	2918	826	579	1974
356	Positive	1.197	148.01485	no MS2: TAURINE	[M+Na]+	148.00389	C2H7NO3S	Organosulfonic acids	XOAAWQZATWQOTB-UHFFFAOYSA-N	NCCS(O)(=O)=O	434	443	410	876	1081	970	812	848	495	498	479	527	552	991	4	1645	3163	2883	3550	3360	2712	2339	3406	3571	630	1322	1057	1086	367	512	22	2994	2502	2189	3075	2863	406	389	2003
357	Positive	1.187	148.05423	low score: L-Glutamic acid; CE0; WHUUTDBJXJRKMK-VKHMYHEASA-N	[M+H]+	148.06044	C5H9NO4	Glutamic acid and derivatives	WHUUTDBJXJRKMK-VKHMYHEASA-N	C(CC(=O)O)[C@@H](C(=O)O)N	1406	1649	2016	1878	1548	1444	2303	2091	1764	1483	2277	2256	1441	1506	664	364	120	159	174	168	164	12	168	297	1533	1522	2655	1269	1568	1372	947	157	242	246	340	216	180	84	187
358	Positive	0.415	148.09778	low score: Mevalonic Acid Lactone	[M+NH4]+	148.09682	C6H10O3	Delta valerolactones	JYVXNLLUYHCIIH-UHFFFAOYSA-N	O=C1OCCC(O)(C)C1	20	67	36	42	39	44	42	55	23	51	9	49	58	62	43	27	1082	1168	1076	1122	1393	1441	1704	1632	62	32	50	63	71	30	57	950	1456	1457	1710	1472	20	56	1500
359	Positive	6.536	148.13223	Unknown	[M+H]+	null	null	null	null	null	371	427	224	148	296	313	279	322	197	353	176	271	901	833	5012	5282	1106	1096	1091	809	573	930	691	803	261	252	1129	887	452	1082	848	727	1058	714	721	530	5006	5235	644
360	Positive	0.396	148.14543	Unknown	[M+H]+	null	null	null	null	null	4501	5129	4571	4411	4210	4220	4757	4967	4246	4905	4388	4497	4091	4902	981	2017	2285	2945	1945	2324	2053	2332	2584	2621	4450	4412	3855	4144	3643	4376	1482	2859	2744	2271	2681	2493	1574	1397	2353
361	Positive	0.559	148.14737	Unknown	[M+H]+	null	null	null	null	null	6009	5181	5792	5078	4680	4837	5408	5084	5048	5490	4652	5047	4751	4693	408	522	1746	2389	1981	1834	1848	2053	2088	2034	4555	4630	4998	4370	4119	4558	1394	2080	2080	1927	1986	2231	694	566	2214
362	Positive	0.521	148.94182	Unknown	[M+H]+	null	null	null	null	null	22	14	28	21	6	24	6	17	0	26	6	5	0	30	12	28	3666	4362	4802	4298	4907	4732	5389	5394	20	23	32	21	26	0	719	2859	4798	4889	4657	4819	75	101	4497
363	Positive	0.710	148.94334	Unknown	[M+H]+	null	null	null	null	null	14	9	17	18	0	0	0	12	6	4	5	0	10	29	15	44	4566	5397	5099	5488	5696	5828	5382	5723	24	16	5	0	26	5	724	4643	5387	5306	5774	5696	22	4	5439
364	Positive	0.052	149.03291	no MS2: alpha-Keto-gamma-(methylthio)butyric acid	[M+H]+	149.02669	C5H8O3S	Thia fatty acids	SXFSQZDSUWACKX-UHFFFAOYSA-N	O=C(O)C(=O)CCSC	18546	19010	20272	18469	19414	19646	19598	18343	18164	19664	19531	21127	22726	23338	15992	13979	35175	33729	36440	33481	36539	35819	38491	36530	19179	18426	22982	21052	21191	22102	19788	31463	39318	32201	39311	40094	15261	18047	34915
365	Positive	13.492	149.03329	no MS2: alpha-Keto-gamma-(methylthio)butyric acid	[M+H]+	149.02669	C5H8O3S	Thia fatty acids	SXFSQZDSUWACKX-UHFFFAOYSA-N	O=C(O)C(=O)CCSC	21025	22277	22349	21524	22422	22363	21860	21317	22764	20556	20977	19563	23226	23106	12794	15598	37558	40435	44967	46797	44164	42016	46976	44892	21941	20996	21251	23173	23637	22719	32931	36836	42776	42258	40956	44361	13200	13050	40779
366	Positive	6.045	149.03447	low score: S-Citramalic acid	[M+H]+	149.04445	C5H8O5	Hydroxy fatty acids	XFTRTWQBIOMVPK-YFKPBYRVSA-N	C[C@](CC(=O)O)(C(=O)O)O	28526	30544	32314	33931	33614	32253	30753	30706	29481	30799	31695	34304	35927	38621	10961	8628	26821	26887	28891	23917	28568	24565	27329	24307	33144	33275	36343	37355	37263	35802	24302	24210	28526	22793	28726	24231	10690	8657	23448
367	Positive	14.318	149.03450	no MS2: alpha-Keto-gamma-(methylthio)butyric acid	[M+H]+	149.02669	C5H8O3S	Thia fatty acids	SXFSQZDSUWACKX-UHFFFAOYSA-N	O=C(O)C(=O)CCSC	20320	21748	23301	20942	22165	21429	21466	21457	22374	21324	22447	20449	22067	21450	11170	11272	39932	43972	50806	49449	48253	44698	48325	45915	20428	20203	21424	22463	21624	21606	34709	40797	45293	51948	44198	49063	14658	13729	41753
368	Positive	10.541	149.03458	Phthalic anhydride	[M+H]+	149.02332	C8H4O3	Phthalic anhydrides	LGRFSURHDFAFJT-UHFFFAOYSA-N	O=c(o1)c(c2)c(ccc2)c(=O)1	21106	22041	20683	21447	21403	23765	22791	22058	20401	22899	23849	24430	25465	23281	17616	16010	37206	38240	37976	34572	39981	38145	42062	48484	22723	22104	22950	21168	23322	23784	37709	34178	40293	39545	38380	43722	13220	15495	34457
369	Positive	12.617	149.03505	no MS2: alpha-Keto-gamma-(methylthio)butyric acid	[M+H]+	149.02669	C5H8O3S	Thia fatty acids	SXFSQZDSUWACKX-UHFFFAOYSA-N	O=C(O)C(=O)CCSC	21392	23684	21914	21384	21243	21885	23064	20772	22684	21669	22327	21793	23334	21401	6134	13345	36939	35563	40745	43842	41312	39059	41550	40833	21437	22176	21055	22188	22534	20831	31842	35180	38694	38483	37451	41434	8697	8601	36287
370	Positive	0.824	149.03554	low score: S-Citramalic acid	[M+H]+	149.04445	C5H8O5	Hydroxy fatty acids	XFTRTWQBIOMVPK-YFKPBYRVSA-N	C[C@](CC(=O)O)(C(=O)O)O	26377	28792	30141	28970	28436	26125	30014	29662	29786	29498	30636	30883	31062	31530	1012	8028	23695	24735	22927	21706	23910	24574	22813	22485	27361	28482	31806	29545	30536	32269	5795	20418	27278	21741	24997	25280	4912	6200	24681
371	Positive	6.123	149.03574	no MS2: 2-Hydroxyglutaric acid	[M+H]+	149.04445	C5H8O5	Short-chain hydroxy acids and derivatives	HWXBTNAVRSUOJR-UHFFFAOYSA-N	O=C(O)CCC(O)C(=O)O	35769	33788	36172	34443	35534	33211	36495	34310	35757	37542	34833	35067	35888	38666	7079	6593	30152	29822	33195	27393	33899	27922	30660	27829	36533	33773	36529	37531	37541	35504	25390	27274	31297	25365	31960	27182	7689	5393	27024
372	Positive	1.833	149.03609	no MS2: 2-Hydroxyglutaric acid	[M+H]+	149.04445	C5H8O5	Short-chain hydroxy acids and derivatives	HWXBTNAVRSUOJR-UHFFFAOYSA-N	O=C(O)CCC(O)C(=O)O	36568	31681	32830	34643	33102	35425	36842	32563	33471	36601	33560	34532	32994	31312	5988	4946	29016	28671	27924	26978	29960	28978	26489	28701	33048	30871	34095	31063	32216	32203	20803	24482	32548	25801	27270	27978	6407	5112	28941
373	Positive	9.541	149.03619	low score: S-Citramalic acid	[M+H]+	149.04445	C5H8O5	Hydroxy fatty acids	XFTRTWQBIOMVPK-YFKPBYRVSA-N	C[C@](CC(=O)O)(C(=O)O)O	23689	22772	23611	23167	24080	25833	25960	23994	22933	26190	26027	25512	24666	24346	8498	7280	33991	33869	34164	32162	34450	37446	34663	35206	23585	22950	21820	22234	23022	25579	31350	32360	33651	34377	35368	40988	7645	8168	31206
374	Positive	8.381	149.03633	low score: S-Citramalic acid	[M+H]+	149.04445	C5H8O5	Hydroxy fatty acids	XFTRTWQBIOMVPK-YFKPBYRVSA-N	C[C@](CC(=O)O)(C(=O)O)O	25404	25385	26734	27246	28146	27965	27536	26706	27865	30474	27653	29937	25577	28305	5215	5770	36460	35809	36720	31876	34268	36276	34565	34736	26716	26250	28064	25731	27271	27441	30387	36972	34350	33578	36856	41003	6780	5498	32488
375	Positive	10.685	149.03674	low score: S-Citramalic acid	[M+H]+	149.04445	C5H8O5	Hydroxy fatty acids	XFTRTWQBIOMVPK-YFKPBYRVSA-N	C[C@](CC(=O)O)(C(=O)O)O	22545	22951	24079	23225	23257	26018	25186	23740	22652	25311	24326	24375	25254	23786	5695	9564	34772	34203	34694	38169	37820	37528	35468	37104	24524	23755	23067	21954	24037	22432	30438	31808	36464	35828	35950	43762	6661	8912	32841
376	Positive	9.118	149.03691	low score: S-Citramalic acid	[M+H]+	149.04445	C5H8O5	Hydroxy fatty acids	XFTRTWQBIOMVPK-YFKPBYRVSA-N	C[C@](CC(=O)O)(C(=O)O)O	25522	23072	24990	23645	23943	25918	25270	24858	23867	26396	26235	27410	26211	24211	4672	6301	31797	35731	35115	28265	31535	38577	32770	32108	24989	24000	23880	22342	25022	23795	28328	32175	34248	31396	30394	37696	4598	7660	30914
377	Positive	11.056	149.03732	low score: S-Citramalic acid	[M+H]+	149.04445	C5H8O5	Hydroxy fatty acids	XFTRTWQBIOMVPK-YFKPBYRVSA-N	C[C@](CC(=O)O)(C(=O)O)O	29190	28916	27769	28341	26502	30758	28141	28798	27991	29812	29491	29110	28571	27769	4580	3561	34346	33261	34121	34819	37298	36809	38277	37801	30063	30908	23456	26731	28333	27637	32524	31705	34607	35376	35355	41601	5759	4334	31725
378	Positive	2.139	149.03740	no MS2: 2-Hydroxyglutaric acid	[M+H]+	149.04445	C5H8O5	Short-chain hydroxy acids and derivatives	HWXBTNAVRSUOJR-UHFFFAOYSA-N	O=C(O)CCC(O)C(=O)O	33667	32317	34024	36137	33225	31530	37106	32445	36222	37728	33092	34735	38438	36359	3759	4186	25130	23056	23323	23178	25953	22769	22461	24273	35316	33333	35895	35525	38297	36301	21275	20434	29591	22218	25126	25082	3578	2776	24881
379	Positive	6.261	149.03749	no MS2: 2-Hydroxyglutaric acid	[M+H]+	149.04445	C5H8O5	Short-chain hydroxy acids and derivatives	HWXBTNAVRSUOJR-UHFFFAOYSA-N	O=C(O)CCC(O)C(=O)O	36144	35689	38066	35792	38070	34731	36902	35795	37138	37846	35259	36212	35943	37206	3952	4469	40676	40325	43169	36598	41355	36006	41400	38513	38387	36613	36623	35386	34268	35597	32043	35490	39884	34749	41188	34133	4386	3897	32549
380	Positive	17.801	149.03786	no MS2: 2-Hydroxyglutaric acid	[M+H]+	149.04445	C5H8O5	Short-chain hydroxy acids and derivatives	HWXBTNAVRSUOJR-UHFFFAOYSA-N	O=C(O)CCC(O)C(=O)O	20846	20716	21823	21594	22350	22144	20956	21784	20687	21944	20374	21288	23342	23234	3521	3919	38500	30675	41558	36752	46410	42101	48164	45713	20319	29769	22917	20987	22543	23143	32251	41693	38422	38655	44272	48702	5163	4740	40097
381	Positive	0.719	149.03789	low score: S-Citramalic acid	[M+H]+	149.04445	C5H8O5	Hydroxy fatty acids	XFTRTWQBIOMVPK-YFKPBYRVSA-N	C[C@](CC(=O)O)(C(=O)O)O	31476	29063	30320	29315	28570	31023	30523	30044	30103	33283	30940	31144	28002	30418	3457	2461	28528	28282	26886	25456	27346	27242	26813	26421	27929	28841	31402	27833	27609	27737	18574	24354	31912	25448	30283	31823	3721	2673	28532
382	Positive	6.762	149.03799	no MS2: 2-Hydroxyglutaric acid	[M+H]+	149.04445	C5H8O5	Short-chain hydroxy acids and derivatives	HWXBTNAVRSUOJR-UHFFFAOYSA-N	O=C(O)CCC(O)C(=O)O	33797	33442	36685	34573	35908	32722	33764	33807	35222	36125	32793	35999	31871	35746	2621	3403	39884	38109	37393	32538	38955	35305	37054	34680	36267	33379	33830	33488	32317	34478	28915	33445	36770	31814	40064	37027	4608	3776	32810
383	Positive	1.717	149.03802	low score: S-Citramalic acid	[M+H]+	149.04445	C5H8O5	Hydroxy fatty acids	XFTRTWQBIOMVPK-YFKPBYRVSA-N	C[C@](CC(=O)O)(C(=O)O)O	32208	29864	31318	32890	30853	34276	34960	31210	33736	36057	31289	33637	33076	30743	3304	2416	27949	28211	28233	26239	31151	28739	26858	28215	31655	30806	32887	29978	32156	30931	20531	24762	32463	25375	29743	30564	3934	2788	29124
384	Positive	6.368	149.03828	no MS2: 2-Hydroxyglutaric acid	[M+H]+	149.04445	C5H8O5	Short-chain hydroxy acids and derivatives	HWXBTNAVRSUOJR-UHFFFAOYSA-N	O=C(O)CCC(O)C(=O)O	36056	34633	37404	36378	37297	34941	35902	35043	37114	37980	34221	36167	33470	36399	2242	3235	40046	40604	42478	36326	40518	37977	40669	38153	38210	36613	35705	35694	34639	34596	33866	34989	39622	35029	41339	38743	3390	3932	36148
385	Positive	2.066	149.03831	no MS2: 2-Hydroxyglutaric acid	[M+H]+	149.04445	C5H8O5	Short-chain hydroxy acids and derivatives	HWXBTNAVRSUOJR-UHFFFAOYSA-N	O=C(O)CCC(O)C(=O)O	35213	34297	34554	36081	35424	35741	37982	34773	36830	38277	34910	36995	37447	35764	2177	2606	24603	24112	24357	23440	27941	24423	22623	25313	36089	33520	36051	34384	35637	34692	21557	21256	28986	23022	25763	24958	1983	2843	26165
386	Positive	8.292	149.03925	low score: S-Citramalic acid	[M+H]+	149.04445	C5H8O5	Hydroxy fatty acids	XFTRTWQBIOMVPK-YFKPBYRVSA-N	C[C@](CC(=O)O)(C(=O)O)O	23378	24057	29131	27442	28387	28116	28972	26900	28234	30829	27996	30317	25628	28154	3052	2663	37638	36564	36603	33789	35213	37480	37457	35536	27151	28172	28065	25372	27059	27990	30108	36560	35524	33150	36852	41128	3146	2552	32071
387	Positive	0.809	149.95294	Unknown	[M+H]+	null	null	null	null	null	7	16	11	10	7	17	15	20	17	17	7	16	30	22	4	256	1516	1709	2408	2390	2594	2618	2554	2474	11	9	21	21	22	38	373	1578	2223	2342	2675	2536	184	137	1854
388	Positive	1.134	150.02550	low score: QUINOLINATE	[M-H2O+H]+	150.01857	C7H5NO4	Pyridinecarboxylic acids	GJAWHXHKYYXBSV-UHFFFAOYSA-N	OC(=O)C1=CC=CN=C1C(O)=O	865	896	915	997	739	796	794	740	655	688	1008	935	626	827	1723	1029	3772	3193	3265	3462	3047	3385	3183	3360	992	931	915	771	713	815	339	3168	3552	3808	4460	4039	607	678	3447
389	Positive	1.533	150.03568	low score: Benzyl Isothiocyanate	[M+H]+	150.03720	C8H7NS	Benzene and substituted derivatives	MDKCFLQDBWCQCV-UHFFFAOYSA-N	S=C=NCC=1C=CC=CC1	2579	2261	2177	2252	2258	2425	2590	2358	2716	2441	2346	2194	2747	2535	1133	1651	2066	2470	2430	2213	2557	2407	2213	2413	2296	2141	2793	2643	2553	2671	1771	2077	2726	2141	2439	2618	1194	1425	2353
390	Positive	11.060	150.04080	no MS2: 2-Methylbenzothiazole	[M+H]+	150.03720	C8H7NS	Benzothiazoles	DXYYSGDWQCSKKO-UHFFFAOYSA-N	CC1=NC2=CC=CC=C2S1	2500	2576	2519	2416	2634	2961	2528	2780	2625	2618	2664	2684	2817	2696	513	561	3000	3112	2989	3264	3041	3584	3227	3388	2630	2615	1873	2504	2566	2617	2822	2768	3010	3291	2990	3907	490	470	2671
391	Positive	1.158	150.06923	METHIONINE	[M+H]+	150.05832	C5H11NO2S	Methionine and derivatives	FFEARJCKVFRZRR-BYPYZUCNSA-N	CSCC[C@@H](C(=O)O)N	226	324	495	462	362	504	577	522	390	310	616	600	367	455	12979	209	2818	2560	2311	2833	2194	2456	2237	2728	549	454	749	419	437	440	15581	2986	2596	3162	2214	1625	200	135	1990
392	Positive	0.555	150.93883	Unknown	[M+H]+	null	null	null	null	null	18	28	19	16	21	24	12	24	31	38	30	37	30	30	16	0	1599	1829	1954	1933	1999	1855	2178	1835	34	26	11	30	36	29	288	1205	1706	1721	2066	1757	16	50	1720
393	Positive	0.692	150.94031	Unknown	[M+H]+	null	null	null	null	null	28	30	19	16	39	25	17	10	13	16	35	14	15	23	31	18	1857	1830	1913	1850	1877	1964	1930	2055	8	24	12	10	22	37	224	1635	1966	2130	2111	2083	17	62	1910
394	Positive	1.093	150.98808	Unknown	[M+H]+	null	null	null	null	null	388	406	481	406	508	476	205	288	363	257	338	172	628	657	102	1293	2916	3262	2237	2289	2443	3900	2629	2313	949	972	566	601	354	350	118	4104	2199	2569	3565	2869	1485	1501	2983
395	Positive	1.186	151.05681	no MS2: D-Xylulose	[M+H]+	151.06010	C5H10O5	Pentoses	LQXVFWRQNMEDEE-OVEKKEMJSA-N	C1C(C(C(O1)(CO)O)O)O	345	517	391	477	531	655	304	294	581	510	310	299	351	230	893	773	1138	949	1749	1828	1435	1756	1083	1102	378	346	225	528	337	562	205	1585	1466	1226	1068	1049	676	677	803
396	Positive	0.890	151.05782	low score: D-(-)-Ribose	[M+H]+	151.06010	C5H10O5	Pentoses	HMFHBZSHGGEWLO-SOOFDHNKSA-N	C(C1C(C(C(O1)O)O)O)O	47	72	84	64	77	77	88	86	111	113	62	91	59	35	1178	142	144	166	192	158	109	199	151	132	56	67	67	64	83	75	1222	140	216	181	184	125	67	47	155
397	Positive	0.477	151.13278	Unknown	[M+H]+	null	null	null	null	null	174	192	273	173	197	133	107	143	216	239	178	187	133	194	60	140	1830	2319	1603	1669	1664	1616	1573	1509	178	203	149	123	164	265	286	2099	2003	1867	1750	1408	305	380	2012
398	Positive	0.441	151.94933	Unknown	[M+H]+	null	null	null	null	null	7	9	8	8	8	17	0	0	8	6	6	8	0	0	36	33	819	1286	920	890	967	1177	1598	1353	8	15	15	6	8	10	522	862	1432	1124	1060	1098	207	208	1155
399	Positive	1.181	152.04295	no MS2: OXOPROLINE	[M+Na]+	152.03181	C5H7NO3	Alpha amino acids and derivatives	ODHCTXKNWHHXJC-UHFFFAOYSA-N	OC(=O)C1CCC(=O)N1	213	402	306	142	332	559	246	185	331	322	166	238	331	325	255	387	785	595	942	700	1214	1337	854	731	157	412	146	357	318	421	147	678	710	1255	674	449	403	239	999
400	Positive	13.601	153.12752	10-HYDROXYDECANOATE	[M-2H2O+H]+	153.12740	C10H20O3	Medium-chain hydroxy acids and derivatives	YJCJVMMDTBEITC-UHFFFAOYSA-N	C(CCCCC(=O)O)CCCCO	8844	4088	3936	5244	5413	6822	6143	7766	3755	5655	4220	7100	27642	23465	164822	164914	32440	35547	27943	32227	26092	40162	29542	36925	7855	5679	21040	29382	18378	20551	32670	25170	35312	38620	25731	27719	150836	370677	34438
401	Positive	1.389	153.12799	10-HYDROXYDECANOATE	[M-2H2O+H]+	153.12740	C10H20O3	Medium-chain hydroxy acids and derivatives	YJCJVMMDTBEITC-UHFFFAOYSA-N	C(CCCCC(=O)O)CCCCO	147983	134732	133548	9956	5499	4972	4687	8170	10388	137712	139502	135887	134821	18587	119832	132360	128016	128615	130770	55376	59868	127719	129653	55833	142322	5613	123203	30983	34683	37818	32930	124945	132488	137627	132023	43820	138379	155591	128855
402	Positive	15.606	153.13741	no MS2: Unknown (carbon number 10); PlaSMA ID-249	[M+H]+	153.12810	C10H16O	Unknown	null	null	162136	169128	163855	159872	172990	167174	159010	162046	162993	170508	161957	173321	160925	160702	106251	108288	156277	167218	179954	174139	183746	178614	196158	184481	164907	165183	158322	165675	167735	175954	117286	146138	174654	178844	188890	191339	83327	282390	172590
403	Positive	14.774	153.13759	no MS2: Unknown (carbon number 10); PlaSMA ID-249	[M+H]+	153.12810	C10H16O	Unknown	null	null	163425	162920	156247	168770	171656	166903	163642	163129	158841	165816	166054	164210	162967	162365	88744	103420	116188	129715	138486	135219	145583	155606	161722	150455	170410	162391	159036	159799	163707	164420	88767	105636	142422	145315	156218	155499	77407	198985	131625
404	Positive	1.672	153.13789	low score: Unknown (carbon number 10); PlaSMA ID-249	[M+H]+	153.12810	C10H16O	Unknown	null	null	131965	117672	120035	117513	116012	128459	122700	121550	120202	119842	123095	118161	116913	115128	56033	76602	120462	123549	122644	121830	118036	116125	120486	119096	119884	141191	111082	117909	119889	126897	78543	118092	117587	119507	112219	126212	77023	91205	118031
405	Positive	0.061	153.13834	no MS2: Unknown (carbon number 10); PlaSMA ID-249	[M+H]+	153.12810	C10H16O	Unknown	null	null	195898	196343	191727	177316	180685	188356	183207	188844	190348	198590	194090	190184	189690	190428	61597	106088	201851	220287	237756	234808	238762	240884	248349	250507	184690	188298	170821	182724	193451	190756	84835	175319	240781	239536	251678	245770	75768	68862	232006
406	Positive	16.313	153.13849	Unknown	[M+H]+	null	null	null	null	null	177090	177431	171342	174192	179661	180427	179661	175521	173150	185515	164659	175492	173799	173041	87582	71062	186449	184611	195847	194108	202995	203547	206656	207889	177760	167980	165264	165158	176256	170742	149397	173059	196172	204993	201080	213181	77214	186463	189362
407	Positive	14.507	153.13867	Unknown	[M+H]+	null	null	null	null	null	171077	167983	170364	157924	168872	162940	164819	165944	161423	173889	170305	166861	161335	162874	87516	61442	111072	111228	122292	122253	137115	130526	135984	133405	167319	170548	158087	153722	168256	164533	80261	95091	131175	130803	133350	134918	73035	177961	111888
408	Positive	6.988	153.13872	Unknown	[M+H]+	null	null	null	null	null	127923	124720	124842	132394	125279	126677	130464	128607	127312	130805	125984	134192	122738	122622	66014	60913	120375	118263	120480	116768	123996	122058	121604	124244	130539	126497	122779	114504	129805	128105	123938	119684	121403	121139	121916	124025	83796	66189	119615
409	Positive	1.142	153.13884	Unknown	[M+H]+	null	null	null	null	null	101735	97676	104725	104211	96137	98439	102133	102342	101168	106547	99701	103468	101140	108946	47448	20701	27632	23631	20867	23116	26839	27891	28419	31434	102741	106076	90747	100647	103330	103941	76095	23232	22123	23108	30151	30693	25251	21465	23165
410	Positive	15.069	153.13892	Unknown	[M+H]+	null	null	null	null	null	176089	172178	172512	168702	174686	169780	171713	169068	169020	175957	174760	173071	167755	170268	74540	70609	137849	151853	161457	158473	170839	168416	173833	172648	173154	177147	159326	158072	167619	170723	98486	128485	161460	158562	176970	168919	62853	197407	146383
411	Positive	15.467	153.13893	Unknown	[M+H]+	null	null	null	null	null	171160	174845	166648	177394	170667	175750	172746	169829	168870	171682	169194	180736	177518	173576	83232	67796	150694	166724	173680	177341	183814	183621	187532	186061	170133	164727	158792	154467	177017	169295	118138	137554	179601	173669	186578	188111	51276	183713	164302
412	Positive	15.973	153.13904	Unknown	[M+H]+	null	null	null	null	null	174670	178711	176340	174196	181260	178337	174555	170321	170122	178102	178365	182713	176263	171997	66011	60690	176548	179851	193286	195919	196782	199475	205478	200482	178258	165095	160755	170193	177456	172899	139778	164932	195394	193291	204897	202798	48925	171772	187703
413	Positive	15.204	153.13907	Unknown	[M+H]+	null	null	null	null	null	169868	171691	174113	173332	168278	170374	171713	176828	173557	178270	174504	177241	162399	167424	59370	64250	140220	157063	161457	158473	178154	172470	178355	173460	177915	172718	155831	163361	170057	173718	108544	128485	172171	167156	176970	183418	58655	188899	155040
414	Positive	0.513	153.13907	Unknown	[M+H]+	null	null	null	null	null	141042	130162	129696	135116	127539	137892	135984	130923	138980	133913	135964	129698	131860	135123	58807	45509	123511	131749	131454	126884	133678	132678	138729	137795	128819	146178	132771	134206	133104	135613	83160	123474	135494	135823	130064	136684	67462	60811	132884
415	Positive	6.623	153.13927	Unknown	[M+H]+	null	null	null	null	null	137085	121080	128180	132743	132495	129993	130908	127355	127590	132966	125170	133832	126909	126874	39944	49274	117943	114668	119554	112299	116524	115615	120762	116994	135006	125162	114985	111978	121868	125729	112364	118716	118112	116105	119010	117761	44361	62522	119141
416	Positive	14.894	153.13976	Unknown	[M+H]+	null	null	null	null	null	175813	169218	163121	174112	176808	166365	172122	176253	170011	176634	172550	177663	165817	164264	57099	59282	127604	143222	147598	155703	167514	159439	165541	161209	174673	175823	157916	161212	171532	176808	97363	110195	154475	149612	167003	162628	45680	114510	140687
417	Positive	6.518	153.14145	no MS2: Unknown (carbon number 10); PlaSMA ID-249	[M+H]+	153.12810	C10H16O	Unknown	null	null	133615	125730	130576	132740	133960	132841	133842	132400	130291	131023	134215	133826	127345	120650	16119	28265	117943	118543	120805	112414	116544	117898	120762	119423	137063	129041	116199	112846	124410	119996	127578	113067	118027	117611	118056	119369	22198	27432	118126
418	Positive	2.099	153.14209	Unknown	[M+H]+	null	null	null	null	null	121357	116788	115480	116648	112336	120158	115925	116824	118295	121104	120074	120923	115518	122427	14137	17510	94506	89341	91740	89642	88231	87411	89676	92381	110351	126247	105891	109417	113936	119931	78353	85433	100185	89378	90719	92242	20272	14199	87194
419	Positive	1.497	153.14212	low score: Unknown (carbon number 10); PlaSMA ID-249	[M+H]+	153.12810	C10H16O	Unknown	null	null	137543	135130	129914	130783	130167	139192	134505	128738	129112	137780	132640	136913	124234	127121	13672	13382	125300	131512	130929	129115	132147	126601	132662	130660	134036	147188	118117	119184	129796	132728	80306	125884	137143	133308	136755	129002	20337	17396	130636
420	Positive	6.265	153.14220	Unknown	[M+H]+	null	null	null	null	null	128198	124098	127697	128677	129537	133020	127307	129416	127249	131053	127368	132084	117486	120518	14813	12229	104234	104520	111132	108404	110510	111276	115252	105604	128434	121890	118401	115632	121990	122067	108503	114409	107375	109733	114432	107524	21825	16375	103885
421	Positive	0.249	153.14259	Unknown	[M+H]+	null	null	null	null	null	190235	186243	181068	178046	178042	188385	182338	181392	179515	179299	184413	181133	184726	176657	15905	15439	140766	171243	196573	196097	211650	205745	213821	209023	180511	184266	163111	171890	176777	179598	82645	110580	199602	203092	215686	217533	18159	19624	185505
422	Positive	6.111	153.14270	Unknown	[M+H]+	null	null	null	null	null	119117	121354	120883	121853	116790	122354	127247	119550	117964	123778	119486	125537	118068	118377	9786	10623	87864	88576	92517	89794	96757	88723	94282	91026	121562	122070	114470	115289	124437	122269	92735	95363	98044	92730	98171	88754	13171	14789	90462
423	Positive	1.318	153.14297	low score: Unknown (carbon number 10); PlaSMA ID-249	[M+H]+	153.12810	C10H16O	Unknown	null	null	148601	134732	129621	135265	128740	139723	135270	139587	142959	137629	140387	136796	135280	132198	7338	11115	127647	123008	132541	123446	129828	130606	130285	130179	143037	139157	124380	127554	135928	134589	79994	128320	135370	139175	125581	125871	10381	12533	132491
424	Positive	0.327	153.14299	Unknown	[M+H]+	null	null	null	null	null	178507	186243	179702	177426	175195	188385	178812	176010	181273	179299	184304	184484	185632	175852	6870	13126	100321	134943	171022	165918	179320	174505	174625	170890	181630	184266	163375	173050	180714	178269	83601	92855	171227	169442	181549	185683	18159	19624	156951
425	Positive	6.415	153.14301	no MS2: Unknown (carbon number 10); PlaSMA ID-249	[M+H]+	153.12810	C10H16O	Unknown	null	null	128394	123854	132509	128206	131892	133020	130784	128122	135147	130927	130952	133826	119746	120752	7703	12992	116674	120236	114368	111223	118153	117216	115882	118188	132939	130972	114000	113909	123944	121403	125475	116625	120366	116020	117314	116501	10111	15404	117817
426	Positive	1.150	154.06834	no MS2: CREATINE	[M+Na]+	154.05870	C4H9N3O2	Alpha amino acids and derivatives	CVSVTCORWBXHQV-UHFFFAOYSA-N	CN(CC(O)=O)C(N)=N	2221	2371	1429	1452	1928	1985	2124	2241	1575	1852	1978	1945	1504	1463	242	1381	1147	1354	1316	1444	884	1009	1566	1160	1320	1377	590	803	622	839	565	1518	1189	1264	1323	915	534	638	1431
427	Positive	1.077	154.07120	no MS2: Hypoxanthine	[M+NH4]+	154.07234	C5H4N4O	Hypoxanthines	FDGQSTZJBFJUBT-UHFFFAOYSA-N	OC1=NC=NC=2NC=NC12	2333	2459	1525	1544	2120	2088	2256	2366	1684	1954	2107	2050	1507	1469	250	246	1151	1400	881	1567	888	434	1648	1186	1430	1485	598	798	1034	834	445	1513	1241	1199	1455	948	217	337	1424
428	Positive	13.425	154.13127	no MS2: Gabapentin-lactam	[M+H]+	154.12263	C9H15NO	Azaspirodecane derivatives	JAWPQJDOQPSNIQ-UHFFFAOYSA-N	O=C1CC2(CN1)CCCCC2	1265	975	1004	1153	1426	1570	775	1330	825	884	20360	914	4736	3991	16586	18325	5793	5495	4297	5902	4997	6523	4760	6273	2221	1465	4283	4762	3298	3861	5186	4578	6278	5751	5089	4653	16424	39688	4773
429	Positive	6.617	154.14041	Unknown	[M+H]+	null	null	null	null	null	14765	13298	13200	13794	13789	13825	13600	13646	13486	13702	13535	14180	13797	13186	8545	9254	13730	14512	14604	13476	13753	14340	14207	13349	13253	13522	12712	12575	13137	13508	13612	13638	15292	14338	14084	14495	10588	9925	14532
430	Positive	0.067	154.14127	no MS2: Gabapentin-lactam	[M+H]+	154.12263	C9H15NO	Azaspirodecane derivatives	JAWPQJDOQPSNIQ-UHFFFAOYSA-N	O=C1CC2(CN1)CCCCC2	19812	20310	20466	20760	19894	20475	18441	21447	20091	20728	20797	19789	20512	22383	5983	9225	24049	24080	27075	26318	27232	28652	28037	29481	19660	22602	18553	19451	21112	25204	10881	20510	28158	27684	27779	26990	12493	20228	26476
431	Positive	7.958	154.14314	Unknown	[M+H]+	null	null	null	null	null	15302	14681	15256	15515	15325	14965	15205	14873	15434	16635	15109	15903	14051	14840	4411	5662	15208	13785	14438	14038	14656	14006	14236	14566	15869	15269	14471	14249	18074	14674	15282	14376	15561	15258	15273	14861	4783	6170	14091
432	Positive	6.127	154.14435	Unknown	[M+H]+	null	null	null	null	null	15196	13379	13639	13459	12834	13796	13700	13845	13792	13846	13513	13853	13984	13420	2621	2140	11364	11295	12230	11802	12191	11009	11772	11090	13884	13505	12770	13022	13721	13740	11175	11628	11919	11148	11920	10975	3340	3101	11300
433	Positive	0.503	154.97733	Unknown	[M+H]+	null	null	null	null	null	25	39	28	24	18	20	33	18	20	39	15	28	22	26	92	395	1479	1678	1510	1329	1347	1259	1625	1506	30	42	20	30	28	23	377	1670	1499	1415	1192	1331	334	421	1700
434	Positive	0.621	154.97816	Unknown	[M+H]+	null	null	null	null	null	31	40	40	35	21	31	32	18	20	34	34	17	52	60	94	371	1286	1321	1510	1325	1132	1170	1323	1405	44	49	60	30	30	26	419	1258	1392	1168	1264	1283	255	319	1366
435	Positive	0.509	155.14545	no MS2: Linalool	[M+H]+	155.14304	C10H18O	Acyclic monoterpenoids	CDOSHBSSFJOMGT-UHFFFAOYSA-N	OC(C=C)(C)CCC=C(C)C	1077	1127	1091	1065	1132	1175	1113	1026	1409	1091	1077	1142	1361	1144	880	949	1592	1457	1449	1363	1422	1836	1477	1623	1216	1463	1349	1267	1306	1391	1108	1717	1742	1617	1805	1516	922	756	1472
436	Positive	0.464	155.97345	Unknown	[M+H]+	null	null	null	null	null	26	45	41	7	28	39	36	53	33	55	54	39	41	49	1128	10266	356	274	258	310	328	432	392	337	35	48	70	51	38	23	111	426	382	369	406	445	3261	1675	136
437	Positive	0.878	155.98694	Unknown	[M+H]+	null	null	null	null	null	1599	1560	1366	1647	1398	1732	1564	1607	1664	1573	1556	1534	2016	2154	5	286	402	583	589	548	422	386	470	384	1664	1745	2019	2074	1814	1923	34	423	247	589	483	725	396	140	411
438	Positive	1.100	156.05368	low score: 4-chloro-N,N-dimethylaniline	[M+K]+	156.05745	C8H10ClN	Dialkylarylamines	IONGEXNDPXANJD-UHFFFAOYSA-N	CN(C)c1ccc(cc1)Cl	2440	2400	2755	2799	2867	3458	2672	2393	1828	2108	3369	3399	3314	3259	23	1048	7093	9040	10785	10616	8258	8585	7770	6763	4144	4136	2530	4039	2091	2000	61	12917	9562	9683	12390	11640	990	931	9083
439	Positive	1.286	156.07721	Histidine	[M+H]+	156.07675	C6H9N3O2	Histidine and derivatives	HNDVDQJCIGZPNO-YFKPBYRVSA-N	O=C(O)C(N)CC1=CN=CN1	2929	3056	3810	3666	2890	2674	2539	2819	3189	3147	2770	2517	2567	683	143	13960	5892	5713	7482	5931	3237	2994	2662	2348	3945	3939	312	3568	2461	2886	63	9369	7279	7063	2505	2524	11310	9583	6210
440	Positive	0.795	156.08783	low score: 2-Phenylpyridine	[M+H]+	156.08078	C11H9N	Phenylpyridines	VQGHOUODWALEFC-UHFFFAOYSA-N	c1ccc(cc1)c2ccccn2	37	66	13	38	16	54	57	35	34	19	30	41	56	41	2186	47	141	104	96	119	81	47	133	13	26	35	20	47	62	40	5184	74	100	144	127	138	90	74	83
441	Positive	1.226	156.08829	low score: 2-Phenylpyridine	[M+H]+	156.08078	C11H9N	Phenylpyridines	VQGHOUODWALEFC-UHFFFAOYSA-N	c1ccc(cc1)c2ccccn2	2854	2946	3733	3541	2827	2620	2488	2701	3100	3030	2684	2439	2558	2809	90	5611	5892	5713	7482	5928	6862	6259	6110	5684	3832	3868	1209	3542	2461	2886	263	9431	7219	6982	5018	5408	3497	4263	6173
442	Positive	0.941	156.08864	no MS2: 2-Phenylpyridine	[M+H]+	156.08078	C11H9N	Phenylpyridines	VQGHOUODWALEFC-UHFFFAOYSA-N	c1ccc(cc1)c2ccccn2	412	346	516	487	427	318	388	338	458	386	358	351	1145	546	166	199	1144	2389	2962	2419	3065	2145	1807	1868	422	583	1948	592	323	334	746	1889	2096	1760	2126	1368	218	256	1651
443	Positive	0.348	156.96289	Unknown	[M+H]+	null	null	null	null	null	29	15	8	24	26	19	9	22	12	16	15	11	19	21	184	16	1741	1685	554	786	803	876	827	880	18	14	17	14	2	41	45	2144	1104	1107	987	662	50	38	1274
444	Positive	0.747	156.98245	Unknown	[M+H]+	null	null	null	null	null	17	41	40	52	34	30	28	91	77	98	98	91	84	71	225	204	1176	1328	1182	1460	1274	1415	1323	1224	44	45	89	79	27	58	561	1314	1262	1494	1107	1266	287	336	1449
445	Positive	14.091	157.09288	no MS2: SUBERATE	[M-H2O+H]+	157.08592	C8H14O4	Medium-chain fatty acids	TYFQFVWCELRYAO-UHFFFAOYSA-N	OC(=O)CCCCCCC(O)=O	379	306	379	258	341	312	413	378	364	378	480	438	475	599	661	836	6589	6068	7423	10316	7288	6869	8077	7916	395	317	483	518	546	435	9021	10243	5505	7242	8174	10219	1608	244	7632
446	Positive	0.997	157.09314	low score: Unknown (carbon number 8); PlaSMA ID-275	[M+H]+	157.08530	C8H12O3	Unknown	null	null	2673	2330	2855	2560	2021	2132	2739	2561	2927	4109	3360	4005	3827	3431	172	6304	13315	10071	10732	10249	14744	10956	12778	10843	2559	2804	3226	3273	3323	3961	316	8429	12303	9274	15727	16121	7665	7832	13283
447	Positive	0.355	157.09352	low score: Unknown (carbon number 8); PlaSMA ID-275	[M+H]+	157.08530	C8H12O3	Unknown	null	null	367	253	284	315	214	270	297	285	321	365	309	353	344	379	82	575	7085	6872	9025	9155	11696	10147	11794	11723	276	363	385	222	265	434	690	4598	8029	7186	14635	13482	390	1033	6981
448	Positive	0.807	157.09416	no MS2: SUBERATE	[M-H2O+H]+	157.08592	C8H14O4	Medium-chain fatty acids	TYFQFVWCELRYAO-UHFFFAOYSA-N	OC(=O)CCCCCCC(O)=O	40	58	76	48	64	66	71	70	50	78	67	53	111	85	4721	93	799	899	610	768	1133	753	672	598	42	74	86	82	46	80	8041	1263	1027	1024	878	949	158	370	1331
449	Positive	1.136	157.09480	no MS2: SUBERATE	[M+H+Na]2+	157.08592	C8H14O4	Medium-chain fatty acids	TYFQFVWCELRYAO-UHFFFAOYSA-N	OC(=O)CCCCCCC(O)=O	1638	1383	1794	1538	1412	1506	1806	1447	1929	2234	2343	2415	2575	2309	136	1200	11574	9395	10468	9432	12640	9402	10470	9419	2074	2010	3235	2189	2106	2137	714	6262	11575	8659	12770	12809	1893	2555	10858
450	Positive	12.620	157.09564	no MS2: Unknown (carbon number 8); PlaSMA ID-276	[M+H]+	157.08650	C8H12O3	Unknown	null	null	343	422	349	409	284	416	435	431	475	337	485	362	439	401	232	544	4292	3675	4909	5742	5467	4271	5897	5210	352	474	495	508	432	380	5690	4423	3700	5050	5011	5962	1003	763	3929
451	Positive	13.601	157.09569	no MS2: Unknown (carbon number 8); PlaSMA ID-276	[M+H]+	157.08650	C8H12O3	Unknown	null	null	313	376	315	283	475	256	461	433	477	390	498	323	469	411	484	593	5920	5689	6767	8579	7151	5951	8553	7542	425	318	317	478	464	376	9655	8219	5195	6801	7534	9096	1046	291	6348
452	Positive	0.486	157.97255	Unknown	[M+H]+	null	null	null	null	null	24	21	18	0	22	13	6	18	15	21	23	3	7	32	154	1186	66	128	192	100	150	160	169	231	16	18	17	18	19	23	64	66	199	51	186	103	380	363	221
453	Positive	0.677	158.01428	Unknown	[M+H]+	null	null	null	null	null	5	9	24	16	8	12	6	29	24	18	4	10	13	20	327	57	6214	6692	6423	6378	5606	5847	5551	5542	25	20	22	32	4	28	2660	7672	5938	7305	5018	5167	2153	3594	6667
454	Positive	1.168	158.12848	low score: Buformin	[M+H]+	158.14001	C6H15N5	Biguanides	XSEUMFJMFFMCIU-UHFFFAOYSA-N	CCCCNC(=N)NC(N)=N	6979	6821	7014	6837	5348	5354	5971	6353	4921	4704	8380	8443	7134	7097	165	4765	12949	11626	6417	6525	7911	7687	8722	9858	7266	7515	13391	8555	8673	8891	1338	14905	14207	13408	11965	10163	351	265	1469
455	Positive	1.027	158.13011	Homostachydrine; CE0; XULZWQRXYTVUTE-ZETCQYMHSA-N	[M+H]+	158.11757	C8H15NO2	Alpha amino acids	XULZWQRXYTVUTE-ZETCQYMHSA-N	C[N+]1(C)CCCC[C@H]1C(=O)[O-]	4880	4603	5233	6792	4233	4299	4248	4222	3209	3504	5224	5671	5162	5730	15615	226	3265	2879	2440	2331	2471	1705	1386	2094	7104	5733	3600	7221	6275	6674	34971	4948	4461	3910	2714	2974	134	5	194
456	Positive	7.989	158.16541	Unknown	[M+H]+	null	null	null	null	null	459	431	554	385	515	510	485	390	466	545	458	479	393	525	11903	7521	29462	30055	32623	34803	35744	35846	35758	35571	382	432	507	442	424	432	42398	28883	31832	34540	36898	35167	6085	6738	33066
457	Positive	7.217	158.16591	Unknown	[M+H]+	null	null	null	null	null	408	427	441	433	498	452	416	414	433	459	452	429	399	487	189	181	2978	2961	3175	3209	3062	3484	3405	3383	370	382	473	402	434	426	1296	2902	3119	3231	3220	3178	130	222	3027
458	Positive	8.130	158.16789	Unknown	[M+H]+	null	null	null	null	null	3469	3649	3169	4119	3230	3062	4027	4573	4509	3712	3929	4145	2888	4007	230	254	3935	4016	4204	4092	4246	4429	4016	4080	4572	3549	3276	3154	2685	3653	3836	4103	4113	3981	4678	4167	199	236	4533
459	Positive	0.504	158.95187	Unknown	[M+H]+	null	null	null	null	null	6	0	0	2	9	6	16	16	6	0	6	6	3	2	319	2080	96	102	62	107	53	86	163	117	6	28	20	8	0	21	109	124	86	102	114	126	2632	2558	131
460	Positive	0.776	158.97459	Unknown	[M+H]+	null	null	null	null	null	24	18	24	22	33	28	26	29	24	19	11	27	44	54	23911	482	9210	11380	11322	11546	11401	11030	11844	10663	49	51	44	11	33	47	37572	10338	10666	11787	11122	10629	468	852	11236
461	Positive	1.031	158.97530	Unknown	[M+H]+	null	null	null	null	null	3473	3326	3369	3247	3348	3314	3183	3129	3448	3538	3834	3778	3411	3394	80	4562	27101	25950	24036	26187	24808	24855	25641	25133	3182	3245	4277	3396	3245	3227	479	23219	27724	25360	24469	23820	5561	4927	27993
462	Positive	1.282	159.00757	Unknown	[M+H]+	null	null	null	null	null	14	9	3	0	6	21	3	0	11	6	20	13	5	7	101	141	1358	1167	945	632	1034	1078	1038	1096	0	0	81	16	17	23	83	1184	1058	876	833	971	194	290	1381
463	Positive	1.250	159.08615	low score: (S)-1-carbamoylpyrrolidine-2-carboxylic acid	[M+H]+	159.08000	C6H10N2O3	Proline and derivatives	RTNFBJXLYMERBB-BYPYZUCNSA-N	O=C(N)N1CCCC1C(=O)O	457	592	701	483	923	962	764	635	798	792	924	948	597	640	146	2216	2768	2817	4572	3460	3134	2912	2461	3095	892	748	422	613	673	635	229	4644	4584	4262	3351	3486	1617	1501	2034
464	Positive	0.913	159.08635	no MS2: (S)-1-carbamoylpyrrolidine-2-carboxylic acid	[M+H]+	159.08000	C6H10N2O3	Proline and derivatives	RTNFBJXLYMERBB-BYPYZUCNSA-N	O=C(N)N1CCCC1C(=O)O	115	169	192	57	83	158	176	187	48	62	195	185	125	73	2613	246	383	366	275	372	183	292	235	221	138	213	40	148	127	150	4326	694	397	327	402	496	199	231	239
465	Positive	0.428	159.97267	Unknown	[M+H]+	null	null	null	null	null	32	2	5	0	13	17	26	10	17	29	18	14	12	26	214	1637	457	528	710	311	573	584	856	866	26	23	19	30	51	7	415	462	469	552	374	610	2266	2013	370
466	Positive	1.081	160.04733	no MS2: TRIGONELLINE	[M+Na]+	160.03690	C7H7NO2	Alkaloids and derivatives	WWNNZCOKKKDOPX-UHFFFAOYSA-N	C[N+]1=CC(=CC=C1)C([O-])=O	1424	1390	1326	1422	1691	1812	1338	1343	1334	1416	2539	2514	1600	1887	75	1645	2651	2354	2290	2532	2427	2694	3107	2505	1268	1305	759	1158	1306	1480	43	3837	4237	3838	3600	3179	128	119	790
467	Positive	1.658	160.07596	low score: Indole-3-acetaldehyde	[M+H]+	160.07568	C10H9NO	3-alkylindoles	WHOOUMGHGSPMGR-UHFFFAOYSA-N	C1=CC=C2C(=C1)C(=CN2)CC=O	37	13	33	18	18	18	20	17	10	37	21	31	11	28	2371	61	34	26	33	40	20	12	7	29	9	34	12	13	4	27	40	31	32	63	25	16	35	72	47
468	Positive	1.135	160.08595	low score: Indole-3-acetaldehyde	[M+ACN+H]+	160.07568	C10H9NO	3-alkylindoles	WHOOUMGHGSPMGR-UHFFFAOYSA-N	C1=CC=C2C(=C1)C(=CN2)CC=O	1401	1571	3406	3743	1519	1556	2126	2341	3254	3338	3508	3468	2042	2071	7938	992	2036	2392	2864	2392	3382	3234	2695	2692	4214	3940	2330	2643	2848	2802	9558	2823	3313	3302	343	415	2305	1909	714
469	Positive	1.376	160.08611	low score: Unknown (carbon number 10); PlaSMA ID-289	[M+H-NH3]+	160.07620	C10H12N2O	Unknown	null	null	92	67	197	181	103	86	170	163	136	146	255	204	74	113	19	244	151	147	94	42	58	105	117	83	275	202	107	155	191	115	2476	203	188	149	100	89	199	140	32
470	Positive	1.168	160.14418	5-Aminovaleric acid betaine; CE10; CDLVFVFTRQPQFU-UHFFFAOYSA-N	[M+H]+	160.13321	C8H17NO2	NA	CDLVFVFTRQPQFU-UHFFFAOYSA-N	C[N+](C)(C)CCCCC(=O)[O-]	21055	21028	20784	22148	14185	14645	20080	20540	17508	17667	11188	11607	10971	11820	157	13722	13331	11334	14850	16175	13311	14404	10659	11913	23765	23735	20052	15614	23905	24888	1813	21863	28635	28090	18929	17932	10579	9522	11199
471	Positive	0.981	160.14511	5-Aminovaleric acid betaine; CE10; CDLVFVFTRQPQFU-UHFFFAOYSA-N	[M+H]+	160.13321	C8H17NO2	NA	CDLVFVFTRQPQFU-UHFFFAOYSA-N	C[N+](C)(C)CCCCC(=O)[O-]	8940	10582	11817	11460	9309	8441	10666	10794	8417	10090	5370	5899	6876	7004	35022	2399	4382	5868	8463	8334	7322	7183	5331	5680	11005	13422	3068	11078	13302	14279	42077	11887	13600	14707	8307	8868	1684	2144	5916
472	Positive	1.062	162.06113	no MS2: 3-hydroxy-1,2-dimethylpyridin-4(1H)-one	[M+2Na-H]+	162.05000	C7H9NO2	Methylpyridines	TZXKOCQBRNJULO-UHFFFAOYSA-N	O=C1C=CN(C(=C1O)C)C	2438	2308	2366	2449	2552	2625	2313	2198	2319	2406	2986	2908	2392	2406	121	3190	6226	5821	7282	7091	7933	7282	7961	7833	2438	2492	1523	2112	1689	1689	197	8100	7160	7837	6694	6617	2628	2664	5711
473	Positive	0.890	162.12395	CARNITINE	[M+H]+	162.11247	C7H15NO3	Carnitines	PHIQHXFUZVPYII-LURJTMIESA-N	C[N+](C)(C)C[C@H](CC(=O)[O-])O	48	71	3044	2578	7040	3306	4700	4822	60	5765	5201	66	4043	3348	27126	2540	3118	1522	1891	2324	2260	3530	3635	3253	3757	3268	58	8207	3776	4493	32406	4461	2302	2498	4105	4751	3224	1728	3638
474	Positive	1.162	162.12672	CARNITINE	[M+H]+	162.11247	C7H15NO3	Carnitines	PHIQHXFUZVPYII-LURJTMIESA-N	C[N+](C)(C)C[C@H](CC(=O)[O-])O	67326	67654	66754	67806	57063	57245	56931	54994	70615	66209	78869	78706	50021	52820	52	39081	34123	36745	34593	40871	38039	42472	36756	39686	67424	68695	65309	53189	49692	50975	292	45108	38547	35413	52289	48647	33840	28391	36670
475	Positive	0.958	163.07219	no MS2: 3-Hydroxy-3-methylglutarate	[M+H]+	163.06010	C6H10O5	Hydroxy fatty acids	NPOAOTPXWNWTSH-UHFFFAOYSA-N	OC(=O)CC(C)(O)CC(O)=O	174	355	251	254	241	470	338	244	200	432	229	482	152	184	2390	54	82	124	113	32	179	127	234	56	134	278	16	320	285	106	2423	118	378	58	126	264	44	19	66
476	Positive	10.136	163.07419	low score: Methyl trans-cinnamic acid	[M+H]+	163.07536	C10H10O2	Cinnamic acids	RURHILYUWQEGOS-VOTSOKGWSA-N	Cc1ccc(cc1)/C=C/C(=O)O	7	26	10	28	19	19	7	13	32	11	28	14	30	26	4744	3839	222	185	166	170	226	1479	1884	1942	11	0	36	28	27	30	1909	259	210	187	1746	371	3119	3089	172
477	Positive	7.725	163.08574	Unknown	[M+H]+	null	null	null	null	null	1524	1442	1272	1391	1412	1826	1439	1422	1369	1318	1386	1404	1322	1281	1227	958	2662	3218	3334	3124	3430	3178	423	3324	1488	1394	1264	1257	1288	1372	3793	2936	3320	3159	3110	3354	898	881	3044
478	Positive	7.639	163.08598	low score: Methyl trans-cinnamic acid	[M+H]+	163.07536	C10H10O2	Cinnamic acids	RURHILYUWQEGOS-VOTSOKGWSA-N	Cc1ccc(cc1)/C=C/C(=O)O	1460	404	338	382	410	289	326	1360	323	232	259	258	1309	375	2943	1776	2662	3067	3249	3124	3478	3122	3239	3411	384	297	386	294	356	325	3793	2936	3254	3159	3183	3377	1551	1638	3044
479	Positive	10.310	163.08975	Unknown	[M+H]+	null	null	null	null	null	1406	1565	1584	1751	1807	1695	1714	1822	1722	1931	1843	2002	662	717	681	317	359	298	379	325	428	441	573	432	2297	2200	953	534	838	876	368	398	375	441	506	498	216	163	346
480	Positive	10.568	163.08989	Unknown	[M+H]+	null	null	null	null	null	6283	6440	6200	7718	7278	7524	8337	7968	8063	8481	8656	8425	3676	3885	106	131	345	406	269	386	337	224	305	666	13555	14384	5465	3477	3948	4368	254	332	434	189	226	257	116	106	269
481	Positive	1.271	163.98164	Unknown	[M+H]+	null	null	null	null	null	8	6	9	4	11	0	0	9	11	6	15	5	3	7	44	103	1085	963	744	788	694	791	1008	940	25	6	13	11	10	6	27	787	400	603	892	857	157	186	568
482	Positive	1.157	164.03969	no MS2: N-ACETYL-L-CYSTEINE	[M+H]+	164.03760	C5H9NO3S	N-acyl-L-alpha-amino acids	PWKSKIMOESPYIA-BYPYZUCNSA-N	CC(=O)N[C@@H](CS)C(=O)O	1586	900	1783	1831	1809	1173	978	1522	1229	820	2111	1837	1441	1414	33	2441	6203	6349	6039	6032	5456	5522	5846	6132	1786	1623	1370	1331	965	516	90	6427	6972	7305	6343	6631	2091	2147	5715
483	Positive	0.878	164.04097	no MS2: N-ACETYL-L-CYSTEINE	[M+H]+	164.03760	C5H9NO3S	N-acyl-L-alpha-amino acids	PWKSKIMOESPYIA-BYPYZUCNSA-N	CC(=O)N[C@@H](CS)C(=O)O	4	5	37	5	5	5	11	11	16	26	5	31	38	9	1384	115	166	18	82	7	82	21	5	111	7	14	9	23	14	15	2911	0	29	26	116	198	132	63	164
484	Positive	1.090	164.04297	no MS2: 2-Chloro-N,N-dimethyl-3-oxobutanamide	[M+H]+	164.04729	C6H10ClNO2	N-acyl amines	QJACRCAPQIYMIH-UHFFFAOYSA-N	CN(C)C(=O)C(Cl)C(C)=O	1707	1658	1912	1970	1865	1808	1751	1689	1344	1389	2239	2007	1458	1424	44	349	6337	6507	6148	6032	5614	5605	5846	6241	1896	1880	1399	1346	987	980	110	6441	7200	7465	6349	6716	270	439	6007
485	Positive	0.399	164.13815	low score: 4-Pentylaniline	[M+H]+	164.14337	C11H17N	Aniline and substituted anilines	DGFTWBUZRHAHTH-UHFFFAOYSA-N	CCCCCC1=CC=C(N)C=C1	114	97	138	159	144	170	169	138	121	187	229	190	150	131	55	79	1986	2360	809	1004	834	965	980	795	135	122	153	156	141	54	81	2654	1704	1722	825	885	24	184	1440
486	Positive	1.021	164.93533	Unknown	[M+H]+	null	null	null	null	null	2450	2670	2306	2183	2147	2038	2081	1704	1977	2049	2892	2814	2125	2373	43	64	849	830	703	570	872	1243	230	870	2366	2197	2001	1468	2002	1915	31	385	926	585	461	380	190	129	993
487	Positive	1.060	165.02583	no MS2: 5-(hydroxymethyl)pyrimidine-2,4-diol	[M+Na]+	165.03000	C5H6N2O3	Pyrimidones	JDBGXEHEIRGOBU-UHFFFAOYSA-N	OC1=NC=C(C(O)=N1)CO	1489	1332	1202	1111	1417	1561	1356	1381	1452	1374	1529	1534	967	969	18	739	5286	5363	6174	6105	5036	4644	5860	5737	1392	1384	1012	1066	1353	1247	5	4794	4801	5471	4541	5352	1123	918	5538
488	Positive	1.143	165.06700	2-Hydroxycinnamic acid, predominantly trans	[M+H]+	165.05463	C9H8O3	Hydroxycinnamic acids	PMOWTIHVNWZYFI-AATRIKPKSA-N	OC(=O)C=Cc(c1)c(O)ccc1	418	392	484	581	441	650	485	382	697	734	512	547	536	514	18695	256	1351	1752	2196	2022	1323	1719	2252	2004	577	574	752	415	735	781	26643	2706	3148	3297	1827	1562	69	143	1454
489	Positive	6.616	165.08722	low score: Phenethylacetate	[M+H]+	165.09100	C10H12O2	Benzene and substituted derivatives	MDHYEMXUFSJLGV-UHFFFAOYSA-N	O=C(OCCC=1C=CC=CC1)C	8	16	22	28	11	40	32	33	27	17	25	33	42	29	408	266	73	57	112	77	51	63	60	64	28	18	31	26	39	28	2062	33	90	125	78	76	309	266	24
490	Positive	0.409	165.12462	low score: Unknown (carbon number 11); PlaSMA ID-343	[M+H]+	165.12790	C11H16O	Unknown	null	null	381	344	411	487	503	436	373	401	373	356	368	518	413	404	112	376	7152	9112	6861	8311	8595	8934	9222	8485	469	644	542	387	450	348	285	7410	9644	9871	9731	7650	281	292	9009
491	Positive	1.322	165.12563	low score: Unknown (carbon number 11); PlaSMA ID-343	[M+H]+	165.12790	C11H16O	Unknown	null	null	463	395	368	390	392	550	402	399	401	416	365	391	382	432	115	187	2533	3138	2056	2460	3044	2993	3045	2752	431	424	439	446	480	495	225	2676	3016	2604	2796	3049	72	111	3264
492	Positive	1.269	165.12625	low score: Unknown (carbon number 11); PlaSMA ID-343	[M+H]+	165.12790	C11H16O	Unknown	null	null	449	400	368	361	390	550	402	342	404	415	365	391	336	432	112	146	2533	3138	2317	2395	2994	2930	2952	2662	427	432	315	446	480	495	227	2712	3055	2666	2796	2912	66	111	3214
493	Positive	12.617	165.13870	low score: Unknown (carbon number 10); PlaSMA ID-345	[M+H]+	165.13850	C10H16N2	Unknown	null	null	315	297	323	264	323	252	249	309	280	287	331	257	138	185	148	160	921	968	1038	1148	975	959	1234	1227	226	344	158	145	142	131	645	655	1096	891	994	928	156	84	939
494	Positive	2.134	166.08553	Phenylalanine	[M+H]+	166.08626	C9H11NO2	Phenylalanine and derivatives	COLNVLDHVKWLRT-UHFFFAOYSA-N	O=C(O)C(N)CC=1C=CC=CC1	17	17	15	15	4	13	21	4	15	26	8	25	9	13	11550	40	4	5	19	9	18	12	15	27	11	4	41	11	26	18	98	14	27	10	19	5	11	40	14
495	Positive	1.146	166.08583	Phenylalanine	[M+H]+	166.08626	C9H11NO2	Phenylalanine and derivatives	COLNVLDHVKWLRT-UHFFFAOYSA-N	O=C(O)C(N)CC=1C=CC=CC1	1089	1226	1497	1527	1936	1513	1045	1243	1175	1380	2672	2604	2975	6790	23275	13608	17825	20716	18675	20365	21320	18958	19490	17633	908	918	2391	4447	7195	6827	3141	14992	25888	22638	17673	19646	5349	5024	5050
496	Positive	1.770	166.09836	low score: 4-hydroxy-4-(pyridin-2-yl)butan-2-one	[M+H]+	166.09000	C9H11NO2	Pyridines and derivatives	NYKHQRHPWDLZTL-UHFFFAOYSA-N	O=C(C)CC(O)C1=NC=CC=C1	54	66	86	108	75	79	76	99	73	106	48	95	77	112	201	104	205	294	404	156	279	220	180	246	68	78	100	73	100	97	22380	212	223	328	163	266	165	117	208
497	Positive	1.515	166.09848	low score: 4-hydroxy-4-(pyridin-2-yl)butan-2-one	[M+H]+	166.09000	C9H11NO2	Pyridines and derivatives	NYKHQRHPWDLZTL-UHFFFAOYSA-N	O=C(C)CC(O)C1=NC=CC=C1	133	155	85	162	144	161	125	154	157	158	120	169	166	168	79	390	429	551	710	530	623	547	665	549	127	158	113	156	150	201	17215	659	722	614	565	572	358	400	550
498	Positive	1.075	166.09866	low score: 4-hydroxy-4-(pyridin-2-yl)butan-2-one	[M+H]+	166.09000	C9H11NO2	Pyridines and derivatives	NYKHQRHPWDLZTL-UHFFFAOYSA-N	O=C(C)CC(O)C1=NC=CC=C1	14554	13314	13351	13332	13548	14974	12842	12732	10922	11941	23845	23377	16171	17275	5458	1528	33864	42558	39010	40138	41988	40952	40178	39775	13347	12661	9135	14913	19976	20019	166	42092	54517	50997	37774	39666	934	1011	17380
499	Positive	0.409	166.10837	low score: Hordenine	[M+H]+	166.12000	C10H15NO	Phenethylamines	KUBCEEMXQZUPDQ-UHFFFAOYSA-N	OC1=CC=C(C=C1)CCN(C)C	372	461	514	333	423	458	498	304	435	280	305	428	448	425	35	326	3446	4183	3140	3960	3562	3752	4152	4001	413	456	308	360	414	328	87	4342	4217	4120	5145	3562	168	1074	3974
500	Positive	0.628	166.90878	Unknown	[M+H]+	null	null	null	null	null	6	6	14	14	5	1	16	15	6	0	1	16	13	17	5	10	1811	1908	2164	2158	2065	2048	2026	2151	9	10	17	34	12	17	366	1995	2062	2081	2013	1815	14	36	2023
501	Positive	0.705	166.91125	Unknown	[M+H]+	null	null	null	null	null	12	16	14	15	5	7	6	15	8	16	14	6	5	18	7	13	1862	1920	2209	2199	2065	2048	2047	2205	8	14	23	6	12	7	386	1978	2062	2153	2042	1815	8	42	2023
502	Positive	1.148	167.04115	no MS2: 2-Nitrobenzamide	[M+H-2H2O]+	167.04512	C7H6N2O3	Nitrobenzenes	KLGQWSOYKYFBTR-UHFFFAOYSA-N	NC(=O)C1=C(C=CC=C1)[N+]([O-])=O	1138	1048	288	1076	1323	1328	1011	916	345	1269	389	1078	831	657	38	776	626	1089	2615	1571	1237	717	857	977	824	1025	368	955	1026	274	97	871	700	258	597	973	1994	1572	2817
503	Positive	1.064	167.04486	no MS2: 2-Nitrobenzamide	[M+H-2H2O]+	167.04512	C7H6N2O3	Nitrobenzenes	KLGQWSOYKYFBTR-UHFFFAOYSA-N	NC(=O)C1=C(C=CC=C1)[N+]([O-])=O	1302	1116	993	1195	1603	1512	1150	1021	1124	1364	1099	1144	897	694	59	205	633	1117	2616	943	1288	744	878	978	926	1142	379	951	1085	1074	98	564	699	353	651	457	380	293	2877
504	Positive	12.613	167.15363	no MS2: Unknown (carbon number 11); PlaSMA ID-371	[M+H]+	167.14430	C11H18O	Unknown	null	null	105	89	78	66	93	96	99	112	110	48	80	86	128	98	192	154	411	638	917	851	624	680	725	962	108	112	84	105	129	106	61	422	611	696	585	604	68	257	682
505	Positive	0.667	168.91109	Unknown	[M+H]+	null	null	null	null	null	10	15	8	14	14	17	18	18	12	18	13	5	25	5	17	21	1552	1584	1616	1770	1407	1694	1684	1634	7	11	5	11	10	14	264	1529	1675	1672	1651	1481	19	24	1658
506	Positive	1.039	169.04811	Uric acid	[M+H]+	169.03561	C5H4N4O3	Xanthines	LEHOTFFKMJEONL-UHFFFAOYSA-N	c12c([nH]c(n1)O)nc(nc2O)O	67	69	126	77	110	167	100	25	103	71	84	126	62	120	21159	311	57	92	86	73	109	32	107	59	220	304	68	140	85	85	23313	27	59	148	71	52	305	682	0
507	Positive	1.282	169.05005	no MS2: METHYGLUTARATE	[M+Na]+	169.04713	C6H10O4	Methyl-branched fatty acids	XJMMNTGIMDZPMU-UHFFFAOYSA-N	CC(CC(O)=O)CC(O)=O	103	78	111	98	180	184	115	94	129	89	116	69	69	86	186	2651	3835	4018	4952	4876	4170	3948	4903	4791	220	236	187	122	82	70	827	6358	3658	3745	1743	1655	1958	1617	2217
508	Positive	0.870	169.05896	no MS2: Glutamine (D)	[M+Na]+	169.05836	C5H10N2O3	Alpha amino acids	ZDXPYRJPNDTMRX-GSVOUGTGSA-N	O=C(O)C(N)CCC(=N)O	9	19	29	7	11	14	8	2	15	22	15	5	18	19	4643	192	59	25	22	30	30	16	25	29	5	12	13	15	19	29	899	94	45	19	65	65	259	133	50
509	Positive	1.179	169.07220	4-ureidobutanoic acid	[M+Na]+	169.06000	C5H10N2O3	Gamma amino acids and derivatives	QYTWIMMLQKHPGL-UHFFFAOYSA-N	O=C(N)NCCCC(=O)O	1066	973	1570	1540	2239	2112	1144	1695	2080	1406	1008	1070	1482	1298	70	642	4240	3883	5526	6139	4885	5432	4576	4855	1631	1600	1593	1574	1144	1136	156	5315	5276	4887	4116	4225	796	634	4540
510	Positive	1.084	169.07269	low score: Norharman	[M+H]+	169.07602	C11H8N2	Beta carbolines	AIFRHYZBTHREPW-UHFFFAOYSA-N	N1C2=CC=CC=C2C2=CC=NC=C12	1888	1708	1616	1559	2239	2150	1694	1727	2106	2068	1537	1566	1482	1298	70	266	2435	2571	5626	4187	3348	3382	2778	4829	1638	1656	1600	1574	1861	1958	542	5464	1877	2839	4216	2822	307	322	3099
511	Positive	1.229	169.09486	no MS2: Caffeidine	[M+H]+	169.10838	C7H12N4O	2-heteroaryl carboxamides	FNYXJOYPHLKLRW-UHFFFAOYSA-N	CNC1=C(N(C=N1)C)C(=O)NC	87	118	83	110	142	140	129	116	68	62	87	89	226	173	167	4118	995	820	3023	1151	981	943	667	962	93	136	85	109	72	116	77	983	1129	867	957	1076	3532	2609	1502
512	Positive	0.795	169.10661	no MS2: Caffeidine	[M+H]+	169.10838	C7H12N4O	2-heteroaryl carboxamides	FNYXJOYPHLKLRW-UHFFFAOYSA-N	CNC1=C(N(C=N1)C)C(=O)NC	48	26	46	63	56	72	63	43	27	74	71	45	58	66	2027	19	58	79	45	76	9	18	73	95	57	55	42	58	70	47	2979	22	48	86	68	61	35	18	50
513	Positive	0.930	169.10663	no MS2: Caffeidine	[M+H]+	169.10838	C7H12N4O	2-heteroaryl carboxamides	FNYXJOYPHLKLRW-UHFFFAOYSA-N	CNC1=C(N(C=N1)C)C(=O)NC	917	975	309	462	1186	370	952	939	850	1038	1514	1485	1036	1103	29	292	1909	1962	2746	2532	1577	1896	1872	2131	1179	1208	78	1089	748	709	443	2144	2159	2082	2389	2032	301	1249	2674
514	Positive	1.034	169.10800	no MS2: Caffeidine	[M+H]+	169.10838	C7H12N4O	2-heteroaryl carboxamides	FNYXJOYPHLKLRW-UHFFFAOYSA-N	CNC1=C(N(C=N1)C)C(=O)NC	938	1013	1226	1172	1229	1264	988	943	882	1063	1571	1491	1048	1116	29	186	1840	1452	2752	2506	1572	1846	2110	2165	1227	1275	1605	1077	739	714	123	2079	2086	2033	2393	1975	82	57	2581
515	Positive	12.617	169.13736	no MS2: (1s,5s)-1,5-dimethyl-3,7-diazabicyclo[3.3.1]nonan-9-one	[M+H]+	169.13000	C9H16N2O	Piperidinones	VAXDAORNOMZREO-DTORHVGOSA-N	O=C1C2(C)CNCC1(C)CNC2	89	101	63	87	68	55	52	73	47	96	36	96	140	119	50	50	362	307	673	766	414	452	631	690	86	72	96	127	120	88	184	271	469	510	353	464	74	45	544
516	Positive	0.890	169.98473	Unknown	[M+H]+	null	null	null	null	null	14	4	15	9	5	7	11	4	9	8	10	23	10	10	7447	1882	109	86	27	125	129	32	203	45	4	14	12	37	11	21	7277	152	116	40	199	236	1968	1020	113
517	Positive	1.080	169.99719	low score: Cysteic acid	[M+H]+	170.01176	C3H7NO5S	Alpha amino acids	XVOYSCVBGLVSOL-REOHCLBHSA-N	O=C(O)C(N)CS(=O)(=O)O	4509	4454	4343	4442	5116	5093	4551	4607	5017	4501	3010	2886	5102	5245	13	4492	14592	14112	11304	17236	12980	14004	18291	17269	7287	7467	6308	5878	3542	3333	42	8365	12934	12068	16422	15327	2449	2878	10021
518	Positive	1.164	169.99776	Unknown	[M+H]+	null	null	null	null	null	2949	4292	4139	4302	2722	4909	4286	4426	4821	4332	2933	2783	3609	5217	58	10325	14873	14251	15688	17231	13275	14004	18514	17287	6853	7138	6245	5878	3498	3333	37	12831	12910	12145	16682	15290	7573	7280	10133
519	Positive	1.244	170.09329	alpha-Methylhistidine	[M+H]+	170.09241	C7H11N3O2	Histidine and derivatives	HRRYYCWYCMJNGA-UHFFFAOYSA-N	O=C(O)C(N)(C)CC1=CN=CN1	87	98	179	206	161	147	107	130	148	116	123	175	268	226	227	4645	501	556	1784	440	559	573	1473	1344	117	97	125	289	395	401	43	1521	644	607	710	617	4694	2616	344
520	Positive	0.290	170.15369	no MS2: Lupinine	[M+H]+	170.15395	C10H19NO	Lupinine-type alkaloids	HDVAWXXJVMJBAR-VHSXEESVSA-N	OCC1CCCN2CCCCC21	287	339	221	369	341	362	403	313	236	397	173	556	944	764	1268	6684	229	199	242	120	147	105	144	313	295	287	1192	1057	1419	1686	25	363	80	212	82	78	5176	3895	146
521	Positive	0.405	170.16838	Unknown	[M+H]+	null	null	null	null	null	8040	5656	7607	7353	7422	7672	8684	8477	7790	6213	7802	8276	6467	6648	150	574	1487	1698	1060	1018	1037	884	1094	987	5967	8218	7376	7235	7932	6489	141	1548	1309	1308	1196	969	469	370	1307
522	Positive	1.528	170.16869	Unknown	[M+H]+	null	null	null	null	null	5907	5605	5645	5629	5485	5867	5643	5316	5702	5783	5832	6094	5395	5668	106	332	100	128	7	124	43	78	57	122	5927	6648	5247	5207	5567	5529	131	99	105	127	102	101	220	124	98
523	Positive	1.325	170.16911	Unknown	[M+H]+	null	null	null	null	null	6631	5604	5658	5522	5440	5851	5480	5835	6212	5526	5707	5639	5764	5782	132	243	33	33	43	32	90	77	3	91	5923	6110	5435	5253	5979	5772	79	32	123	88	64	88	251	203	129
524	Positive	1.417	170.17009	Unknown	[M+H]+	null	null	null	null	null	6687	5646	5670	5634	5530	5868	5722	5835	6232	5626	5902	6094	5770	5782	58	259	112	109	69	123	85	80	57	117	5923	6648	5242	5164	5194	5735	99	32	145	85	64	94	110	94	129
525	Positive	6.360	170.17027	Unknown	[M+H]+	null	null	null	null	null	5862	5426	5852	5625	5778	5693	5386	5832	6085	5682	6023	5735	5383	5243	96	148	223	188	318	206	217	299	223	229	5802	6020	5122	5252	5300	5364	226	216	202	293	137	292	90	57	267
526	Positive	12.599	171.10928	no MS2: Levetiracetam	[M+H]+	171.11281	C8H14N2O2	Alpha amino acids and derivatives	HPHUVLMMVZITSG-LURJTMIESA-N	O=C1N(CCC1)C(C(=N)O)CC	92	78	84	81	84	75	103	118	110	104	121	95	127	118	190	793	8937	7089	7652	9274	7640	6175	7611	7187	77	81	178	143	144	138	14716	11376	6112	8408	6747	7561	940	938	7836
527	Positive	13.784	171.10965	no MS2: Levetiracetam	[M+H]+	171.11281	C8H14N2O2	Alpha amino acids and derivatives	HPHUVLMMVZITSG-LURJTMIESA-N	O=C1N(CCC1)C(C(=N)O)CC	75	90	163	85	71	87	98	70	107	80	130	84	114	104	458	964	17990	12062	13053	17855	11856	9723	13238	12783	121	65	85	136	137	124	21832	25048	9694	14305	11994	12841	991	580	16402
528	Positive	0.983	171.11154	Unknown (carbon number 13); PlaSMA ID-399	[M+H]+	171.11861	C13H14	Unknown	null	null	1498	1234	1546	1278	1125	1227	1603	1419	1711	2319	2114	2084	1915	1988	121	5073	27353	17423	15665	12372	16346	12633	14173	12654	1449	1644	1887	1756	1870	2120	504	14697	17623	12953	17404	17388	6091	5935	22344
529	Positive	13.515	171.11195	no MS2: Levetiracetam	[M+2Na]2+	171.11281	C8H14N2O2	Alpha amino acids and derivatives	HPHUVLMMVZITSG-LURJTMIESA-N	O=C1N(CCC1)C(C(=N)O)CC	84	115	106	136	135	88	123	134	149	103	148	133	109	132	316	416	14956	12373	12314	14604	11329	8621	13719	11413	124	82	91	136	153	122	24773	23202	9493	13429	10810	12286	623	365	13818
530	Positive	0.807	171.11234	no MS2: Levetiracetam	[M+H]+	171.11281	C8H14N2O2	Alpha amino acids and derivatives	HPHUVLMMVZITSG-LURJTMIESA-N	O=C1N(CCC1)C(C(=N)O)CC	66	60	61	62	76	88	49	50	80	61	59	36	83	82	3372	100	1904	1933	1347	1510	1152	1108	965	875	62	70	72	98	54	111	13193	2294	1697	1316	1045	1132	266	160	2227
531	Positive	0.352	171.11316	Unknown (carbon number 13); PlaSMA ID-399	[M+H]+	171.11861	C13H14	Unknown	null	null	78	110	116	64	88	101	87	80	112	79	125	116	133	143	66	210	18531	15458	15995	14567	15472	14756	16072	17138	82	127	109	128	160	174	1281	11819	14860	12945	20242	17748	271	325	15119
532	Positive	7.093	171.15973	Unknown	[M+H]+	null	null	null	null	null	3788	3632	4055	4142	4149	4016	4108	4178	3933	4079	4184	3832	3664	3696	2683	2226	11421	11590	8981	9530	11922	11992	12713	12468	3741	4086	3927	3458	3690	3392	15015	12205	11771	11902	12339	11751	2045	1428	11693
533	Positive	0.519	172.96609	Unknown	[M+H]+	null	null	null	null	null	0	12	7	0	0	10	0	7	0	6	7	6	0	0	55	66	2848	3405	5575	5165	5397	5319	6326	6744	7	9	15	16	0	6	1117	4723	3777	4421	5818	5991	68	92	3466
534	Positive	0.644	172.96672	Unknown	[M+H]+	null	null	null	null	null	0	12	7	5	5	6	0	7	8	13	7	0	1	6	65	63	2692	3056	5378	5556	6278	6383	6510	6756	0	9	5	16	0	6	1083	3700	4348	5105	6137	6288	71	101	3269
535	Positive	1.702	172.96774	Unknown	[M+H]+	null	null	null	null	null	7	4	10	11	11	8	0	5	10	13	5	6	4	5	72	176	1379	1552	2117	2203	2231	2203	2065	2147	8	8	9	9	8	5	920	1476	2214	2123	2011	2220	184	227	2088
536	Positive	1.029	172.99196	no MS2: Tartaric acid	[M+Na]+	173.00000	C4H6O6	Sugar acids and derivatives	FEWJPZIEWOKRBE-UHFFFAOYSA-N	O=C(O)C(O)C(O)C(=O)O	1889	1978	1921	1770	2032	1691	2106	1802	1925	1971	2222	2049	2081	1897	7	112	273	916	718	971	323	232	367	768	1673	1859	2384	1878	2115	2088	261	391	562	670	578	419	83	139	512
537	Positive	1.161	173.08913	no MS2: thymol	[M+H+Na]2+	173.09000	C10H14O	Aromatic monoterpenoids	MGSRCZKZVOBKFT-UHFFFAOYSA-N	OC1=CC(=CC=C1C(C)C)C	730	716	708	681	487	554	667	577	673	730	872	881	648	599	111	312	620	925	957	1001	888	1516	825	957	715	680	921	592	684	657	376	1023	1205	794	485	279	272	156	1250
538	Positive	0.842	174.94878	Unknown	[M+H]+	null	null	null	null	null	4	0	3	7	4	9	11	8	4	0	10	4	7	1	1563	26	183	154	158	219	165	172	130	128	8	5	8	0	0	7	3086	93	124	163	180	176	36	48	177
539	Positive	1.032	174.95123	Unknown	[M+H]+	null	null	null	null	null	125	52	73	146	112	6	170	74	86	105	180	8	133	162	23	132	1531	1609	1326	1308	1124	1331	1286	932	235	129	238	110	60	64	20	1808	1154	1056	1045	1604	185	179	2348
540	Positive	0.462	174.96889	Unknown	[M+H]+	null	null	null	null	null	20	24	0	0	0	10	0	6	8	6	0	11	10	6	126	85	2562	3085	3354	4232	3887	4145	4323	4807	6	6	7	0	6	10	577	3943	3432	3901	3901	3933	18	142	3756
541	Positive	0.830	175.11067	Arginine	[M+H]+	175.11896	C6H14N4O2	L-alpha-amino acids	ODKSFYDXXFIFQN-BYPYZUCNSA-N	C(C[C@@H](C(=O)O)N)CNC(=N)N	43	32	31	47	27	24	29	38	44	22	43	33	38	51	48941	1327	157	75	59	62	46	122	35	108	61	42	54	50	61	31	45140	121	120	89	90	77	6816	415	136
542	Positive	1.249	175.11980	Arginine	[M+H]+	175.11896	C6H14N4O2	L-alpha-amino acids	ODKSFYDXXFIFQN-BYPYZUCNSA-N	C(C[C@@H](C(=O)O)N)CNC(=N)N	2834	2118	2584	2158	4169	2753	2617	2693	3361	3192	3215	3400	4729	4301	326	41361	16678	14207	16405	13389	12941	12778	9244	7548	2979	3527	2457	4478	3551	3805	408	15408	13823	13356	7897	8791	49693	41484	12278
543	Positive	14.403	175.11989	no MS2: Gramine	[M+H]+	175.12000	C11H14N2	3-alkylindoles	OCDGBSUVYYVKQZ-UHFFFAOYSA-N	C=1C=CC2=C(C1)NC=C2CN(C)C	391	377	250	186	294	415	286	295	463	470	309	364	348	301	555	890	2956	3091	1964	1826	2265	2133	2216	2006	290	341	408	332	293	309	4362	2612	2617	2379	2382	2015	1058	425	2560
544	Positive	0.382	175.12141	Arginine	[M+H]+	175.11896	C6H14N4O2	L-alpha-amino acids	ODKSFYDXXFIFQN-UHFFFAOYSA-N	C(CC(C(=O)O)N)CN=C(N)N	449	395	430	362	489	451	556	483	418	317	398	321	455	514	142	730	6350	6863	5965	6484	5648	6080	6829	6158	432	546	372	505	410	458	303	7872	6672	6921	5954	5618	946	1575	6224
545	Positive	1.080	175.12245	Arginine	[M+H]+	175.11896	C6H14N4O2	L-alpha-amino acids	ODKSFYDXXFIFQN-UHFFFAOYSA-N	C(CC(C(=O)O)N)CN=C(N)N	17097	16395	18325	15817	16398	18619	18103	16785	17970	18272	19356	19299	16589	19120	428	11340	58627	64703	60092	64061	63132	63920	60354	58759	17201	16910	15578	15717	14696	14599	646	63692	65807	61996	63335	66194	18995	20390	61825
546	Positive	1.133	176.06503	no MS2: N-AMIDINO-L-ASPARTATE	[M+H]+	176.06659	C5H9N3O4	Aspartic acid and derivatives	VVHOUVWJCQOYGG-REOHCLBHSA-N	C([C@@H](C(=O)O)N=C(N)N)C(=O)O	1331	948	669	683	901	868	979	415	861	734	1030	513	835	813	28	6294	2516	2007	2365	2634	2361	2551	2172	2235	765	751	442	328	408	360	58	2557	2481	2484	2132	2047	4113	4944	1806
547	Positive	1.072	176.07674	low score: ALLANTOIN	[M+NH4]+	176.07782	C4H6N4O3	Imidazoles	POJWUDADGALRAB-UHFFFAOYSA-N	N=C(O)NC1N=C(O)N=C1O	4556	4394	4604	4716	4256	4736	4183	4001	4128	4493	5743	5279	4295	4609	66	2752	11170	11799	13048	13255	14196	14171	14593	14649	4600	4501	2748	3554	3072	3396	141	15177	13242	12824	10859	10195	2015	1765	9236
548	Positive	0.450	176.96388	Unknown	[M+H]+	null	null	null	null	null	0	0	12	0	6	8	6	0	7	0	0	0	0	0	91	168	1469	1916	1831	1998	2006	2026	2500	2671	0	8	17	6	0	0	150	1900	2093	2181	2172	2073	167	232	2148
549	Positive	1.163	177.03773	no MS2: Ascorbic acid	[M+H]+	177.03937	C6H8O6	Butenolides	CIWBSHSKHKDKBQ-JLAZNSOCSA-N	O=C1OC(C(O)=C1O)C(O)CO	431	242	541	518	300	345	277	425	307	62	505	321	230	216	462	184	1584	1529	1453	1949	1467	920	1814	1887	406	435	68	255	267	121	365	1328	2158	1841	1489	1495	235	141	1152
550	Positive	1.250	177.05847	no MS2: Allantoic acid	[M+H]+	177.06183	C4H8N4O4	N-carbamoyl-alpha amino acids	NUCLJNSWZCHRKL-UHFFFAOYSA-N	O=C(O)C(NC(=N)O)NC(=N)O	38	44	34	25	45	44	58	27	107	39	99	36	129	83	166	1473	308	336	397	66	416	276	186	446	50	31	93	81	74	132	303	412	610	341	173	212	653	442	181
551	Positive	1.132	177.07124	no MS2: Pemoline	[M+H]+	177.06586	C9H8N2O2	Benzene and substituted derivatives	NRNCYVBFPDDJNE-UHFFFAOYSA-N	N=C1N=C(O)C(O1)C=2C=CC=CC2	550	418	702	511	1031	472	545	441	614	442	707	655	783	797	53	466	2044	2003	2772	2470	2717	2387	4107	3776	603	576	1109	762	527	363	259	3439	3178	2836	1742	2722	337	302	1599
552	Positive	1.052	177.07295	no MS2: Pemoline	[M+H]+	177.06586	C9H8N2O2	Benzene and substituted derivatives	NRNCYVBFPDDJNE-UHFFFAOYSA-N	N=C1N=C(O)C(O1)C=2C=CC=CC2	625	651	772	812	1352	931	586	546	688	728	1276	974	791	846	54	390	1975	2160	2772	2720	2992	2756	4360	4064	677	638	1225	857	580	519	246	3152	1944	2836	2536	2899	301	257	1816
553	Positive	0.807	177.07297	no MS2: Allantoic acid	[M+H]+	177.06183	C4H8N4O4	N-carbamoyl-alpha amino acids	NUCLJNSWZCHRKL-UHFFFAOYSA-N	O=C(O)C(NC(=N)O)NC(=N)O	177	228	182	162	154	202	186	217	201	163	181	191	201	185	2713	42	372	424	336	168	237	235	177	199	166	128	280	188	225	228	4270	240	288	225	350	199	51	73	358
554	Positive	1.166	177.11388	no MS2: geraniol	[M+Na]+	177.12000	C10H18O	Acyclic monoterpenoids	GLZPCOQZEFWAFX-JXMROGBWSA-N	OCC=C(C)CCC=C(C)C	119	107	243	270	150	152	203	185	258	243	272	280	184	201	375	566	297	310	364	410	457	420	383	308	315	373	215	292	221	214	1155	389	479	443	273	262	1172	1210	202
555	Positive	1.085	177.13696	no MS2: (S)-(+)-2-(anilinomethyl)pyrrolidine	[M+H]+	177.13863	C11H16N2	Phenylalkylamines	MCHWKJRTMPIHRA-UHFFFAOYSA-N	c(c2)ccc(c2)NCC(C1)NCC1	786	829	830	736	700	836	770	801	822	916	764	657	650	944	74	652	5140	5299	4789	5153	5150	4791	5358	4920	740	899	720	749	816	710	246	4963	5146	5232	5217	5304	1368	1244	5244
556	Positive	1.200	178.05856	no MS2: HISTIDINE	[M+Na]+	178.05870	C6H9N3O2	Histidine and derivatives	HNDVDQJCIGZPNO-YFKPBYRVSA-N	N[C@@H](CC1=CNC=N1)C(O)=O	24	33	51	55	59	36	55	4	26	34	43	63	75	105	49	2341	1600	1764	1948	449	2214	400	399	344	23	37	38	69	37	59	35	2322	2138	1809	122	523	1800	1368	1595
557	Positive	1.135	178.07132	no MS2: Phenanthrene	[M]+	178.07770	C14H10	Phenanthrenes and derivatives	YNPNZTXNASCQKK-UHFFFAOYSA-N	C1=CC2=C(C=C1)C1=C(C=CC=C1)C=C2	491	482	602	448	446	321	578	497	634	496	625	519	542	520	26	92	1600	1764	1945	1702	2281	1827	1883	1413	754	558	864	546	388	558	35	2298	2214	1809	883	1511	33	42	1644
558	Positive	0.367	179.03423	low score: 6,7-Dihydroxycoumarin	[M+H]+	179.03389	C9H6O4	6,7-dihydroxycoumarins	ILEDWLMCKZNDJK-UHFFFAOYSA-N	OC1=CC2=C(C=CC(=O)O2)C=C1O	8	8	0	10	0	0	0	0	0	0	0	7	0	7	6	1144	33	9	8	20	57	50	74	62	0	18	17	12	9	0	14	75	41	85	23	44	1873	4984	66
559	Positive	1.248	179.08871	no MS2: Phenanthrene	[M+H]+	179.08553	C14H10	Phenanthrenes and derivatives	YNPNZTXNASCQKK-UHFFFAOYSA-N	C1=CC2=C(C=C1)C1=C(C=CC=C1)C=C2	61	86	63	60	52	101	53	79	88	69	53	79	73	52	34	820	146	77	155	115	193	73	101	100	28	82	67	66	62	78	74	124	139	143	145	97	1114	809	189
560	Positive	12.617	179.15468	low score: 6,7-Dihydroxycoumarin;esculetin	[M+H-H2O]+	179.14999	C9H6O4	6,7-dihydroxycoumarins	ILEDWLMCKZNDJK-UHFFFAOYSA-N	O=C1OC=2C=C(O)C(O)=CC2C=C1	124	132	160	100	134	134	92	111	93	176	84	138	98	79	90	116	426	448	789	937	536	571	836	945	180	99	106	75	87	93	127	333	746	627	449	589	109	94	714
561	Positive	6.172	180.07573	no MS2: Stachydrine hydrochloride	[M+H]+	180.08000	C7H14ClNO2	Proline and derivatives	DUNMULOWUUIQIL-RGMNGODLSA-N	Cl.O=C([O-])C1CCC[N+]1(C)C	6	21	11	5	15	16	9	19	12	20	13	23	37	24	272	20	29	7	12	43	0	28	43	10	17	5	15	10	15	18	1024	12	31	3	17	8	35	17	22
562	Positive	0.938	180.08543	no MS2: D-(+)-GALACTOSAMINE	[M+H]+	180.08665	C6H13NO5	Hexoses	MSWZFWKMSRAUBD-GASJEMHNSA-N	C([C@@H]1[C@@H]([C@@H]([C@H](C(O1)O)N)O)O)O	27	36	178	60	148	55	163	14	22	161	52	195	70	138	2411	148	168	145	111	94	123	95	105	97	100	16	18	236	90	88	138	141	118	121	210	111	117	61	138
563	Positive	1.144	180.11018	no MS2: 1-METHYL-6,7-DIHYDROXY-1,2,3,4-TETRAHYDROISOQUINOLINE	[M+H]+	180.10190	C10H13NO2	Tetrahydroisoquinolines	IBRKLUSXDYATLG-LURJTMIESA-N	C[C@H]1C2=CC(=C(C=C2CCN1)O)O	3163	3110	3004	3087	2229	2742	2544	2802	2488	2511	4052	3849	2658	3077	75	2271	5573	7783	6654	6677	6396	6526	6176	6068	3007	3141	2159	3471	4228	4325	117	7216	9602	9927	8123	7445	489	272	1577
564	Positive	1.091	180.11241	no MS2: Hexamethylphosphoramide	[M+H]+	180.12602	C6H18N3OP	Organic phosphoramides	GNOIPBMMFNIUFM-UHFFFAOYSA-N	CN(C)P(=O)(N(C)C)N(C)C	3488	3119	2888	3051	2378	2840	2777	2695	2384	2402	4200	3887	2652	3101	78	507	5558	7886	6702	6767	6484	6680	6247	6173	3155	3212	2069	3387	4142	4223	112	7326	9844	9983	8308	7662	264	175	1549
565	Positive	0.614	180.92628	Unknown	[M+H]+	null	null	null	null	null	12	6	0	15	13	0	0	19	13	6	5	10	0	0	5	55	828	840	526	519	526	534	572	569	0	16	3	0	5	0	303	1075	591	718	507	519	85	80	677
566	Positive	0.354	181.03505	low score: allantoin	[M+Na]+	181.03000	C4H6N4O3	Imidazoles	POJWUDADGALRAB-UHFFFAOYSA-N	O=C(N)NC1NC(=O)NC1=O	13	13	21	2	10	8	0	15	13	0	7	8	0	7	14	511	16	0	36	8	90	26	60	48	7	52	13	6	14	9	10	173	68	19	9	25	1034	2410	76
567	Positive	12.617	181.17070	Unknown	[M+H]+	null	null	null	null	null	57	38	41	67	56	48	47	40	73	71	29	55	64	31	94	53	205	329	506	598	371	476	525	607	11	42	31	35	66	35	43	233	397	465	270	309	30	27	401
568	Positive	1.067	182.07341	no MS2: 2-(4-aminotetrahydro-2H-pyran-4-yl)acetic acid	[M+Na]+	182.08000	C7H13NO3	Pyranoid amino acids and derivatives	QRIAWCUEIMQLGG-UHFFFAOYSA-N	O=C(O)CC1(N)CCOCC1	1027	930	1021	1026	1055	1232	965	945	820	874	2075	1986	1448	1616	26135	493	4089	5284	4928	4081	5478	5355	3782	3595	1310	1237	813	1534	1523	1394	169	4564	5123	4273	4424	4247	501	469	1445
569	Positive	1.135	182.08055	L-Tyrosine	[M+H]+	182.08118	C9H11NO3	Tyrosine and derivatives	OUYCCCASQSFEME-QMMMGPOBSA-N	c1cc(ccc1C[C@@H](C(=O)O)N)O	974	860	984	1050	958	1132	879	916	776	869	1969	1857	1003	1613	33887	780	4094	5089	4751	2258	5374	5158	3640	3448	1202	1203	700	1278	1095	1129	6775	4579	5014	4242	4250	4194	649	579	1423
570	Positive	0.412	182.96301	Unknown	[M+H]+	null	null	null	null	null	6	26	8	0	0	8	6	16	16	10	6	6	23	0	218	1102	726	234	643	214	759	1084	971	1325	14	16	9	43	9	13	186	1052	224	1004	592	825	1266	1304	999
571	Positive	0.479	182.97272	Unknown	[M+H]+	null	null	null	null	null	123	137	102	105	94	100	98	110	108	108	117	129	91	138	119	453	2679	2693	2710	2793	2854	2871	3131	3264	116	118	144	159	119	87	418	3134	2717	2907	3095	3060	466	768	2830
572	Positive	0.422	183.13672	Unknown	[M+H]+	null	null	null	null	null	35	32	39	17	15	20	29	29	22	33	20	26	41	7	69	35	701	1172	1085	1650	1744	2020	2472	2710	41	13	8	13	31	15	33	187	1064	1713	2421	2277	50	29	1228
573	Positive	12.605	183.15179	no MS2: Unknown (carbon number 10); PlaSMA ID-517	[M+H]+	183.14980	C10H18N2O	Unknown	null	null	59	74	58	91	46	56	82	72	58	92	58	74	72	56	0	95	396	248	884	863	431	522	666	917	69	78	97	79	62	68	95	317	505	618	301	355	14	0	502
574	Positive	0.565	184.00462	Unknown	[M+H]+	null	null	null	null	null	0	11	6	6	6	6	6	6	10	7	1	0	14	0	56	545	214	164	171	101	227	240	99	198	0	0	8	10	6	6	105	170	115	119	126	245	904	1032	117
575	Positive	0.933	184.08533	no MS2: A alpha C	[M+H]+	184.08693	C11H9N3	Alpha carbolines	FJTNLJLPLJDTRM-UHFFFAOYSA-N	c1ccc2c(c1)c1c([nH]2)nc(cc1)N	18	70	75	151	95	133	33	86	82	109	89	79	84	95	363	983	67	104	39	125	122	75	105	82	118	96	34	123	81	57	2082	82	111	54	34	137	1741	1575	80
576	Positive	1.271	184.08618	L-CARNITINE	[M+Na]+	184.09442	C7H15NO3	Carnitines	PHIQHXFUZVPYII-ZCFIWIBFSA-N	C[N+](C)(C)C[C@H](O)CC([O-])=O	1277	1212	2884	3233	4032	4435	2563	2792	1546	1421	1257	1184	1904	1921	63	1776	1424	1706	3370	2433	1058	1245	1994	1443	4532	4156	1269	5238	832	915	111	8979	1625	1620	4227	5143	600	390	1671
577	Positive	1.120	184.09430	L-CARNITINE	[M+Na]+	184.09442	C7H15NO3	Carnitines	PHIQHXFUZVPYII-ZCFIWIBFSA-N	C[N+](C)(C)C[C@H](O)CC([O-])=O	501	470	773	813	1471	1248	736	835	578	548	475	475	809	751	388	4747	1154	1460	1607	1891	1327	1940	1086	1078	1180	1498	1816	1413	413	433	638	1509	1229	780	1331	1328	10751	8660	2281
578	Positive	1.048	184.11192	low score: Simazine-2-hydroxy	[M+H]+	184.11929	C7H13N5O	N-aliphatic s-triazines	YQIXRXMOJFQVBV-UHFFFAOYSA-N	Oc1nc(NCC)nc(NCC)n1	6587	6030	5137	5562	4836	5727	4999	4751	6156	7064	6716	6725	3588	3968	89	181	5774	8824	11462	11208	9800	10085	7854	8026	4913	4912	2995	4513	4324	4822	107	6461	7573	6873	9992	9572	506	411	13449
579	Positive	1.111	184.99174	Unknown	[M+H]+	null	null	null	null	null	87	51	110	90	392	242	65	44	56	37	102	20	277	297	19	199	30	88	703	491	109	204	197	307	483	475	435	584	82	170	159	1215	130	238	177	176	17	41	0
580	Positive	0.428	184.99951	low score: Chelidonic acid (not validated)	[M+H]+	185.00806	C7H4O6	Pyranones and derivatives	PBAYDYUZOSNJGU-UHFFFAOYSA-N	O=C(O)C=1OC(=CC(=O)C=1)C(=O)O	8	26	6	16	15	6	20	20	9	6	30	25	3	15	24	36	1127	1578	3670	2923	2612	3068	5154	4521	6	20	7	12	0	3	104	2174	3103	4055	2771	3309	93	179	2083
581	Positive	12.617	185.16591	Unknown	[M+H]+	null	null	null	null	null	119	114	124	120	158	146	124	108	76	91	107	72	82	126	50	82	515	532	930	1064	554	782	752	1105	124	101	134	136	66	74	182	357	735	819	514	482	71	77	753
582	Positive	1.178	185.97508	Unknown	[M+H]+	null	null	null	null	null	67	104	206	222	32	190	203	233	232	162	48	110	85	49	106	64	389	1286	1324	1699	694	1128	1027	724	262	495	300	357	20	100	69	924	851	851	728	1159	30	79	571
583	Positive	0.637	185.99609	Unknown	[M+H]+	null	null	null	null	null	0	5	14	0	0	13	16	0	0	5	7	12	1	10	27	39	836	702	561	587	487	429	417	394	7	14	23	0	5	10	329	1160	482	468	356	311	78	61	635
584	Positive	1.214	186.12474	Unknown	[M+H]+	null	null	null	null	null	206	190	127	136	127	174	196	211	195	180	214	225	168	141	33	80	39	196	179	106	242	73	203	103	167	175	359	142	157	151	53	303	20	199	224	294	1	28	105
585	Positive	0.806	186.96785	Unknown	[M+H]+	null	null	null	null	null	6	6	9	2	0	0	5	9	8	5	0	5	10	4	56	25	770	1008	840	1103	868	1106	831	852	5	0	0	0	4	7	88	1061	961	1080	905	976	45	71	952
586	Positive	0.424	186.99077	no MS2: D-(-)-3-PHOSPHOGLYCERIC ACID	[M+ACN+Na]+	187.00021	C3H7O7P	Sugar acids and derivatives	OSJPPGNTCRNQQC-UHFFFAOYSA-N	C(C(C(=O)O)O)OP(=O)(O)O	6	18	0	0	6	8	0	7	6	6	7	12	0	0	21	88	518	499	1460	1511	988	1207	2188	1938	0	6	7	11	0	6	117	799	1474	1683	1044	1179	196	231	880
587	Positive	7.706	187.12697	low score: bis-(acetyl)diaminopentane	[M+H]+	187.14410	C9H18N2O2	Acetamides	FQKKPLXFGDCBJT-UHFFFAOYSA-N	OC(=NCCCCCN=C(O)C)C	54	38	8	27	188	37	33	120	37	30	34	38	288	56	7964	4330	782	4507	4825	963	5068	5543	5166	5061	50	37	415	49	47	49	623	3156	948	1170	4910	4953	3827	4353	1395
588	Positive	7.789	187.13972	low score: bis-(acetyl)diaminopentane	[M+H]+	187.14410	C9H18N2O2	Acetamides	FQKKPLXFGDCBJT-UHFFFAOYSA-N	OC(=NCCCCCN=C(O)C)C	4523	5074	4219	4385	4535	4346	4658	4711	4784	4069	4742	4853	3686	4100	1386	850	4299	4577	4834	5614	5063	5529	5161	5034	4646	4514	3511	3766	3968	3948	3478	3154	5096	5573	4903	4953	800	165	4827
589	Positive	14.403	188.01285	Unknown	[M+H]+	null	null	null	null	null	0	0	0	0	7	8	7	0	0	0	7	7	0	8	52	42	125	49	17	38	74	16	0	4	0	7	7	0	0	0	1129	19	63	41	0	9	0	0	121
590	Positive	4.016	188.06996	low score: 4-hydroxy-4-(pyridin-2-yl)butan-2-one	[M+Na]+	188.07001	C9H11NO2	Pyridines and derivatives	NYKHQRHPWDLZTL-UHFFFAOYSA-N	O=C(C)CC(O)C1=NC=CC=C1	7	10	3	5	6	7	19	4	8	10	7	3	11	7	20758	47	15	15	4	9	10	4	4	9	4	7	7	6	11	6	354	14	4	7	9	10	60	61	15
591	Positive	4.535	188.07011	no MS2: 4-hydroxy-4-(pyridin-2-yl)butan-2-one	[M+Na]+	188.07001	C9H11NO2	Pyridines and derivatives	NYKHQRHPWDLZTL-UHFFFAOYSA-N	O=C(C)CC(O)C1=NC=CC=C1	8	4	10	4	6	7	4	8	12	7	6	6	13	12	36368	21	4	4	20	20	13	5	12	10	8	7	6	8	7	8	77	15	23	7	24	15	66	44	20
592	Positive	1.306	188.07135	low score: 4-hydroxy-4-(pyridin-2-yl)butan-2-one	[M+Na]+	188.07001	C9H11NO2	Pyridines and derivatives	NYKHQRHPWDLZTL-UHFFFAOYSA-N	O=C(C)CC(O)C1=NC=CC=C1	34	32	109	88	58	47	69	66	100	102	60	102	237	191	13	12245	1652	5843	6878	2104	1893	1811	1672	1293	57	37	505	297	372	308	53	5051	7176	5778	1205	1223	9253	8574	2238
593	Positive	1.182	188.08241	low score: Metamitron-desamino	[M+H]+	188.08183	C10H9N3O	1,2,4-triazines	OUSYWCQYMPDAEO-UHFFFAOYSA-N	c(ccc1C(=NN=C2C)C(=O)N2)cc1	6127	6257	9422	10328	8025	7949	7004	6800	7481	7070	6905	7156	6330	6124	74	4099	23440	22966	23470	24120	19339	18434	23752	24416	7658	8000	12511	6232	7504	7304	43	21639	23637	21553	13847	13150	1995	2318	29316
594	Positive	3.427	188.08434	low score: Metamitron-desamino	[M+H]+	188.08183	C10H9N3O	1,2,4-triazines	OUSYWCQYMPDAEO-UHFFFAOYSA-N	c(ccc1C(=NN=C2C)C(=O)N2)cc1	12	19	13	10	17	14	15	19	6	12	16	10	10	12	35	31	4	31	35	18	32	26	31	32	30	15	19	10	16	8	55294	32	28	16	17	25	39	32	22
595	Positive	3.589	188.08434	low score: Metamitron-desamino	[M+H]+	188.08183	C10H9N3O	1,2,4-triazines	OUSYWCQYMPDAEO-UHFFFAOYSA-N	c(ccc1C(=NN=C2C)C(=O)N2)cc1	11	9	14	17	9	19	6	13	11	23	11	25	23	22	32	78	18	5	8	30	9	9	35	15	12	18	6	14	10	19	53585	17	37	16	13	10	35	15	43
596	Positive	0.519	188.90526	Unknown	[M+H]+	null	null	null	null	null	6	9	0	0	0	6	6	10	0	6	0	0	6	7	150	111	132	142	183	130	263	403	96	149	5	6	11	0	0	8	199	271	260	91	354	306	310	1175	96
597	Positive	0.961	189.12465	no MS2: N6-Acetyl-L-lysine; CE0; DTERQYGMUDWYAZ-ZETCQYMHSA-N	[M+H]+	189.12337	C8H16N2O3	D-alpha-amino acids	DTERQYGMUDWYAZ-ZETCQYMHSA-N	CC(=NCCCC[C@@H](C(=O)O)N)O	36	22	30	12	21	29	26	9	15	30	20	26	32	37	2010	178	118	32	49	98	93	108	93	99	38	18	34	31	27	29	234	90	98	81	124	103	146	184	86
598	Positive	1.236	189.15898	N,N,N-TRIMETHYLLYSINE	[M+H]+	189.15976	C9H20N2O2	L-alpha-amino acids	MXNRLFUSFKVQSK-QMMMGPOBSA-N	C[N+](C)(C)CCCC[C@H](N)C([O-])=O	133	130	147	169	218	121	139	89	132	164	275	221	153	175	129	1989	203	323	193	182	262	298	292	242	221	251	32	86	64	126	248	240	187	115	268	328	3140	2280	237
599	Positive	1.024	189.17242	Unknown	[M+H]+	null	null	null	null	null	1479	1494	1265	1210	916	901	1584	1602	1408	1409	1269	1392	1722	1708	120	48	359	477	603	533	484	313	649	625	1406	1476	1688	1209	1311	1433	235	437	395	581	787	796	64	69	554
600	Positive	12.687	190.01445	Unknown	[M+H]+	null	null	null	null	null	18	6	6	6	0	0	0	7	0	15	12	0	0	0	0	0	108	201	106	79	36	45	63	50	0	7	10	6	0	0	1255	112	124	61	64	22	15	27	116
601	Positive	14.314	190.01503	Unknown	[M+H]+	null	null	null	null	null	0	0	0	7	0	0	0	8	0	0	7	0	11	0	0	32	1478	1430	1180	1194	896	941	883	720	0	0	0	0	0	7	760	951	1229	1214	862	634	12	0	1007
602	Positive	12.509	190.01869	low score: 2-hydroxyacetanilide	[M+K]+	190.02647	C8H9NO2	Acetanilides	ADVGKWPZRIDURE-UHFFFAOYSA-N	OC=1C=CC=CC1N=C(O)C	7	0	0	0	0	6	7	0	0	0	0	6	6	18	0	15	1358	1250	621	749	594	538	636	606	9	18	0	0	0	0	0	1048	746	744	710	519	0	0	424
603	Positive	0.701	190.94566	Unknown	[M+H]+	null	null	null	null	null	0	6	0	5	0	9	6	5	0	0	0	0	5	12	570	50	1317	1745	1410	1531	1508	1608	1531	1654	20	6	0	6	1	5	328	1448	1461	1605	1662	1500	598	732	1440
604	Positive	0.451	190.95737	Unknown	[M+H]+	null	null	null	null	null	0	33	11	0	7	10	13	8	10	6	7	0	6	7	114	0	527	936	430	489	713	533	1016	741	0	14	6	14	7	6	231	208	1255	1053	760	633	44	91	1005
605	Positive	1.160	191.05191	4-Nitroquinoline-1-oxide	[M+H]+	191.04512	C9H6N2O3	4-nitroquinoline N-oxides	YHQDZJICGQWFHK-UHFFFAOYSA-N	[O-][N+](=O)C1=CC=[N+]([O-])C2=CC=CC=C12	7564	3678	4074	6609	4881	4946	4178	3863	8645	5551	7039	4174	6412	6262	129	16473	27375	24963	38002	38574	35126	37597	30665	27072	7234	6985	3511	4573	4872	9035	132	37932	37068	31712	28464	24568	17234	15266	37039
606	Positive	0.885	191.05325	low score: 4-Nitroquinoline-1-oxide	[M+H]+	191.04512	C9H6N2O3	4-nitroquinoline N-oxides	YHQDZJICGQWFHK-UHFFFAOYSA-N	[O-][N+](=O)C1=CC=[N+]([O-])C2=CC=CC=C12	20	43	165	47	172	38	358	17	31	577	294	359	186	40	1680	296	692	161	1155	1534	1447	1604	1879	1544	223	34	13	163	319	468	16816	2097	1186	1408	1523	1861	533	432	656
607	Positive	1.089	191.05457	low score: 4-nitroquinoline 1-oxide	[M+H]+	191.04512	C9H6N2O3	4-nitroquinoline N-oxides	YHQDZJICGQWFHK-UHFFFAOYSA-N	O=N(=O)C1=CC=N(=O)C=2C=CC=CC12	8328	8484	8310	7796	8661	8960	8208	7905	10545	10440	8300	8401	6496	6399	113	3144	27856	25652	38952	39179	36278	38673	31927	28454	8175	8137	7646	7011	9331	9478	145	38572	37364	33081	29118	25453	1534	2078	38773
608	Positive	0.777	191.07553	low score: 6-methoxy-4-methyl-2H-chromen-2-one	[M+Na]+	191.08000	C11H10O3	Coumarins and derivatives	KNGPIBWCWOQBEK-UHFFFAOYSA-N	O=C1OC=2C=CC(OC)=CC2C(=C1)C	9	16	23	11	19	22	12	9	8	11	9	11	29	10	12450	23	15	16	8	14	12	24	13	7	25	12	14	28	17	23	1748	19	20	18	41	22	43	55	37
609	Positive	1.086	191.09117	low score: 2-[(1S)-1-hydroxyethyl]-1H-quinazolin-4-one	[M+H]+	191.08150	C10H10N2O2	Quinazolines	BMBSGGZMJQTQSO-LURJTMIESA-N	OC=1N=C(N=C2C=CC=CC12)C(O)C	3896	3862	4734	4638	4872	5105	3463	3501	3662	3698	5801	5905	4516	4404	67	230	11674	12359	16725	17389	12162	14397	13694	13402	4837	4627	6507	4100	3017	2974	344	15096	15080	15362	14084	15038	510	727	18758
610	Positive	1.007	191.09151	Unknown	[M+H]+	null	null	null	null	null	3893	3929	4859	4720	4872	5105	3461	3573	3739	3712	5832	6078	4516	4404	60	463	10956	12374	12875	17389	10808	14377	13694	13461	4823	4611	6468	4099	3025	3008	82	12511	12768	15377	14046	14916	456	513	15304
611	Positive	1.272	191.13937	no MS2: NCGC00380942-01_C13H20O2_1H-Indene-3-carboxylic acid, 3a,4,5,6,7,7a-hexahydro-3a,7,7-trimethyl-	[M-H2O+H]+	191.14304	C13H20O2	Carboxylic acids	ACQRUPZAAPLQQP-UHFFFAOYSA-N	CC1(C)CCCC\2(C)C1C\C=C2C(O)=O	67	61	106	64	72	104	67	54	97	94	81	75	79	62	127	1215	244	143	197	115	82	108	38	146	58	86	61	76	51	92	52	70	219	103	91	142	1308	952	112
612	Positive	1.227	192.02541	Unknown	[M+H]+	null	null	null	null	null	14	9	81	1	30	12	23	12	39	12	15	17	47	120	15	1058	254	132	264	474	310	325	601	327	14	13	28	26	33	59	182	490	375	476	324	262	395	264	271
613	Positive	1.234	192.07858	no MS2: Carbendazim	[M+H]+	192.07675	C9H9N3O2	2-benzimidazolylcarbamic acid esters	TWFZGCMQGLPBSX-UHFFFAOYSA-N	COC(=O)NC1=NC2=CC=CC=C2N1	78	57	100	46	101	20	55	54	63	74	86	172	130	215	142	1100	329	459	360	433	478	268	570	417	94	39	144	82	81	101	65	350	502	402	204	263	1605	1202	330
614	Positive	0.704	192.93481	Unknown	[M+H]+	null	null	null	null	null	0	0	0	11	10	13	0	6	5	0	0	6	4	0	124	488	2076	2098	1758	1713	1609	1517	1413	1460	0	5	0	0	5	0	512	2402	1868	2012	1397	1578	412	562	2113
615	Positive	1.157	192.97275	Unknown	[M+H]+	null	null	null	null	null	315	205	432	437	243	311	167	203	271	293	219	174	440	480	18	242	1909	1675	869	1145	2292	2258	1869	1798	491	529	399	469	429	300	232	1647	1622	1724	1884	1911	199	224	1173
616	Positive	0.901	193.16856	no MS2: Unknown (carbon number 13); PlaSMA ID-588	[M+H]+	193.15930	C13H20O	Unknown	null	null	320	366	302	372	300	220	210	236	246	243	232	272	257	358	3351	389	500	690	589	643	944	483	648	808	220	249	319	353	268	291	3893	549	684	431	1004	654	284	169	650
617	Positive	1.210	193.16910	no MS2: Unknown (carbon number 12); PlaSMA ID-590	[M+H]+	193.16000	C12H20N2	Unknown	null	null	407	387	513	443	494	581	531	556	353	315	453	444	530	606	238	86	988	550	1086	1265	993	1025	825	1148	651	683	1066	575	438	478	766	1478	2032	1836	907	1133	12	2	419
618	Positive	12.598	193.17290	Unknown	[M+H]+	null	null	null	null	null	261	236	237	247	246	263	221	222	196	201	279	243	195	126	139	110	1226	1506	2285	2317	1735	1678	1868	2612	187	285	213	152	166	176	684	981	1745	1629	1471	1406	95	244	1677
619	Positive	0.482	193.92921	Unknown	[M+H]+	null	null	null	null	null	98	61	119	82	83	92	90	92	56	83	96	74	66	65	229	2669	100	114	158	85	85	37	189	210	102	61	53	49	31	62	355	203	112	139	129	79	3288	3308	323
620	Positive	1.578	193.92940	Unknown	[M+H]+	null	null	null	null	null	62	92	61	47	39	39	19	25	60	43	42	35	28	26	256	1300	230	218	400	351	398	560	322	682	45	36	42	30	36	10	254	260	357	246	399	408	1414	2019	447
621	Positive	0.819	193.94154	Unknown	[M+H]+	null	null	null	null	null	16	30	23	27	21	48	21	30	32	8	34	22	14	26	4	476	2230	2066	2994	2818	3215	3359	3570	3242	26	22	51	33	54	50	167	2912	2772	2625	3120	3162	218	539	2726
622	Positive	1.893	193.94356	Unknown	[M+H]+	null	null	null	null	null	22	11	17	14	20	21	42	22	36	22	8	24	36	32	50	329	1836	2113	2872	2875	2934	3209	2613	2648	24	31	46	29	43	22	1076	2356	2454	2543	3008	2860	241	238	2440
623	Positive	1.748	193.94543	Unknown	[M+H]+	null	null	null	null	null	20	18	9	32	17	18	10	18	16	35	28	31	41	22	42	124	1615	1828	2447	2843	2639	2777	2638	2647	20	39	28	24	20	10	968	2372	2403	2007	2861	2942	171	224	1994
624	Positive	1.079	194.03473	no MS2: Phenacylamine Hydrochloride	[M+Na]+	194.03432	C8H10ClNO	Alkyl-phenylketones	CVXGFPPAIUELDV-UHFFFAOYSA-N	Cl.O=C(C=1C=CC=CC1)CN	85	241	136	131	270	192	154	163	158	203	211	208	314	254	59	354	1981	3431	3026	2747	2068	2349	2855	3152	280	293	223	334	145	84	253	2751	3029	3446	2751	2276	268	331	3365
625	Positive	6.359	194.09317	low score: 1-(pyrimidin-2-yl)pyrrolidine-2-carboxylic acid	[M+H]+	194.09000	C9H11N3O2	Proline and derivatives	UKGYNTRXPAKSOG-UHFFFAOYSA-N	O=C(O)C1N(C2=NC=CC=N2)CCC1	10	14	10	32	38	26	19	26	43	32	46	1	33	30	148	58	26	85	50	66	31	48	37	29	36	37	31	21	16	33	3779	52	112	83	38	39	14	47	37
626	Positive	5.816	194.11783	low score: Isoprocarb	[M+H]+	194.11755	C11H15NO2	Cumenes	QBSJMKIUCUGGNG-UHFFFAOYSA-N	CNC(=O)OC1=C(C=CC=C1)C(C)C	54	45	23	41	42	64	20	37	33	42	52	37	70	85	2327	1678	198	224	331	210	255	241	219	401	14	36	154	77	270	199	171	327	250	227	295	239	1477	1468	325
627	Positive	0.402	194.13228	no MS2: COTININE	[M+NH4]+	194.12878	C10H12N2O	Pyrrolidinylpyridines	UIKROCXWUNQSPJ-VIFPVBQESA-N	O=C1N(C)C(C=2C=NC=CC2)CC1	405	363	396	346	433	389	468	422	518	387	453	383	364	434	61	84	518	489	562	544	747	752	1089	863	539	433	378	396	320	366	160	523	888	981	687	695	203	191	740
628	Positive	5.847	194.13344	low score: COTININE	[M+NH4]+	194.12878	C10H12N2O	Pyrrolidinylpyridines	UIKROCXWUNQSPJ-VIFPVBQESA-N	O=C1N(C)C(C=2C=NC=CC2)CC1	2080	2238	2167	2084	2242	2138	2203	2198	2214	2343	2270	2025	2163	2553	255	132	1493	1562	2157	1941	2052	2101	2187	2046	2265	2004	2116	2365	2483	2365	1440	1419	1876	1938	2125	2043	185	191	1907
629	Positive	0.983	195.08644	no MS2: Quebrachitol	[M+H]+	195.08632	C7H14O6	Cyclohexanols	DSCFFEYYQKSRSV-UHFFFAOYSA-N	OC1C(O)C(O)C(OC)C(O)C1O	32	72	90	64	67	52	22	34	22	60	55	162	47	40	1359	24	1	32	39	17	26	33	45	65	44	47	12	85	35	23	86	57	55	83	72	17	1	35	17
630	Positive	5.959	195.13626	low score: 5-isopropenyl-2-methyl-2-cyclohexen-1-yl acetate	[M+2H]2+	195.14000	C12H18O2	Menthane monoterpenoids	YTHRBOFHFYZBRJ-VXGBXAGGSA-N	O=C(OC1C(=CCC(C(=C)C)C1)C)C	1496	1520	1517	1570	1671	1769	1620	1571	1548	1594	1472	1368	2402	2504	2062	398	4554	4682	5032	5495	5124	5064	5150	5168	1804	1489	1950	2221	2086	2303	4398	4326	4986	4724	5207	4862	405	361	5073
631	Positive	1.236	195.14021	no MS2: 5-isopropenyl-2-methyl-2-cyclohexen-1-yl acetate	[M+H]+	195.14000	C12H18O2	Menthane monoterpenoids	YTHRBOFHFYZBRJ-VXGBXAGGSA-N	O=C(OC1C(=CCC(C(=C)C)C1)C)C	459	610	512	622	288	448	410	312	467	460	434	406	406	495	163	62	419	597	120	248	554	645	190	292	358	347	561	349	405	408	1535	333	301	208	453	723	46	30	265
632	Positive	0.770	195.92548	Unknown	[M+H]+	null	null	null	null	null	6	13	10	5	0	9	5	0	5	5	20	1	0	13	8	165	1055	938	1167	1079	1119	1107	1239	1234	0	8	2	0	10	9	83	944	1007	1315	1069	1042	149	302	1009
633	Positive	1.148	196.08521	no MS2: GLUCOSAMINATE	[M+H]+	196.08156	C6H13NO6	D-alpha-amino acids	UFYKDFXCZBTLOO-TXICZTDVSA-N	C([C@H]([C@H]([C@@H]([C@H](C(=O)O)N)O)O)O)O	376	328	414	283	254	146	270	280	164	264	459	460	448	504	31	131	973	1441	737	881	1119	932	1364	920	385	424	388	603	382	352	87	2152	1633	1650	1316	778	48	52	333
634	Positive	0.870	196.86343	Unknown	[M+H]+	null	null	null	null	null	9	10	1	5	0	6	6	0	4	1	2	0	4	0	1022	97	139	52	42	60	38	93	127	105	5	0	10	1	0	1	137	111	33	42	118	38	194	150	133
635	Positive	0.909	196.87854	Unknown	[M+H]+	null	null	null	null	null	4	248	149	4	70	150	278	253	196	313	271	323	150	86	132	62	1383	223	340	480	157	804	567	747	154	142	4	104	192	250	2822	1026	300	475	543	838	59	37	947
636	Positive	1.177	196.87863	Unknown	[M+H]+	null	null	null	null	null	3107	1183	3158	3272	2207	1110	1368	2923	3199	1889	3772	2467	3121	3200	22	2820	9275	8709	7784	9816	9456	9931	10363	10540	3104	2991	3165	2860	1564	3212	0	6691	9173	9188	10300	9675	3728	2736	8814
637	Positive	1.108	196.88000	Unknown	[M+H]+	null	null	null	null	null	3253	3276	3341	3368	2360	2430	3025	3022	3349	3480	3966	3770	3143	3211	12	436	9632	8814	7836	9868	9774	9916	10256	10645	3213	3104	3173	2860	3530	3219	7	6606	9159	9210	10300	9727	405	229	8798
638	Positive	0.648	196.90329	Unknown	[M+H]+	null	null	null	null	null	11	5	11	0	5	6	0	4	0	0	6	0	9	9	22	6	767	856	1133	1191	1084	1024	1048	1030	5	15	0	7	5	5	243	912	717	967	1132	1008	21	44	776
639	Positive	1.244	197.09888	ARGININE	[M+Na]+	197.10089	C6H14N4O2	L-alpha-amino acids	ODKSFYDXXFIFQN-BYPYZUCNSA-N	N[C@@H](CCCN=C(N)N)C(O)=O	140	84	121	76	107	53	107	172	96	109	161	218	331	172	47	5044	824	698	842	708	1186	910	391	469	99	135	120	137	162	171	120	1107	702	847	368	427	5915	5095	246
640	Positive	0.800	197.10141	no MS2: ARGININE	[M+ACN+H]+	197.10089	C6H14N4O2	L-alpha-amino acids	ODKSFYDXXFIFQN-BYPYZUCNSA-N	N[C@@H](CCCN=C(N)N)C(O)=O	34	22	37	41	23	12	9	24	25	26	29	16	44	30	1360	49	193	65	74	33	73	69	59	51	14	14	27	35	21	68	563	106	130	106	74	97	91	52	62
641	Positive	1.070	197.11241	no MS2: Loliolide	[M+H]+	197.11722	C11H16O3	Benzofurans	XEVQXKKKAVVSMW-UHFFFAOYSA-N	CC1(CC(CC2(C1=CC(=O)O2)C)O)C	2807	2542	3440	3428	3565	3498	3612	3359	4131	4184	4642	4337	3169	3173	42	377	4925	4638	5323	5594	5574	5042	3133	3224	2737	2735	3582	2841	3078	3096	130	4994	6070	5121	3896	4038	136	471	4418
642	Positive	0.838	197.11642	no MS2: Loliolide	[M+H]+	197.11722	C11H16O3	Benzofurans	XEVQXKKKAVVSMW-UHFFFAOYSA-N	CC1(CC(CC2(C1=CC(=O)O2)C)O)C	32	32	53	70	30	32	25	73	60	64	54	37	56	63	188	68	48	56	72	40	169	205	156	154	36	55	57	36	60	62	3625	170	98	106	200	178	103	67	58
643	Positive	12.598	197.16805	low score: (1R,3r,8S,9r)-1,8-dimethyl-3,6-diazatricyclo[4.3.1.1(3,8)]undecan-9-ol	[M+H]+	197.17000	C11H20N2O	1,4-diazepanes	JNARJHDJLSPXGM-UHFFFAOYSA-N	OC1C2(C)CN3CCN(C2)CC1(C)C3	127	91	98	140	110	144	145	190	171	94	133	133	135	187	122	198	744	894	1720	1776	839	1285	1372	1900	134	68	133	138	222	134	248	426	1330	1168	889	1038	40	73	1282
644	Positive	1.244	198.08571	no MS2: CITRULLINE	[M+Na]+	198.08492	C6H13N3O3	L-alpha-amino acids	RHGKLRLOHDJJDR-BYPYZUCNSA-N	C(C[C@@H](C(=O)O)N)CNC(=O)N	30	63	22	44	118	104	58	55	83	66	30	136	231	105	82	3050	827	878	975	819	677	1113	994	1052	48	74	136	139	49	78	14	680	1074	848	701	993	2809	2416	377
645	Positive	0.912	198.09511	low score: 4-Aminoazobenzene	[M+H]+	198.10257	C12H11N3	Azobenzenes	QPQKUYVSJWQSDY-UHFFFAOYSA-N	NC1=CC=C(C=C1)\N=N\C1=CC=CC=C1	110	161	97	189	309	197	217	6	161	259	180	243	205	162	9161	152	404	218	274	392	186	96	362	332	150	152	11	324	228	238	7089	418	508	454	536	583	220	168	169
646	Positive	1.352	198.09677	no MS2: Galactose	[M+NH4]+	198.09721	C6H12O6	Hexoses	WQZGKKKJIJFFOK-SVZMEOIVSA-N	C([C@@H]1[C@@H]([C@@H]([C@H](C(O1)O)O)O)O)O	198	212	192	244	254	296	234	256	263	221	346	251	201	88	228	1922	289	279	498	301	340	332	320	318	342	319	102	304	226	287	32	580	550	438	324	292	3076	3471	210
647	Positive	1.187	198.10028	no MS2: Galactose	[M+NH4]+	198.09721	C6H12O6	Hexoses	WQZGKKKJIJFFOK-SVZMEOIVSA-N	C([C@@H]1[C@@H]([C@@H]([C@H](C(O1)O)O)O)O)O	1140	1781	1370	1190	2574	1638	1633	2132	2251	1689	2892	1982	1416	2038	289	696	4247	4543	5984	6393	4854	5009	5191	4962	2627	1677	2431	2115	1392	1878	44	7500	7626	6811	5871	5980	690	870	2392
648	Positive	1.087	198.10204	low score: 4-Aminoazobenzene	[M+H]+	198.10257	C12H11N3	Azobenzenes	QPQKUYVSJWQSDY-CCEZHUSRSA-N	NC1=CC=C(C=C1)\N=N\C1=CC=CC=C1	2314	1878	2291	1913	2823	2903	2764	2492	2389	2457	3043	2971	1738	2078	697	160	2616	1803	3390	6584	4908	5110	5127	5013	2821	2651	2337	2230	2256	1905	310	7696	7671	3792	5951	6024	183	203	1643
649	Positive	8.796	198.20053	Unknown	[M+H]+	null	null	null	null	null	199	347	101	331	275	139	126	393	347	380	132	133	157	255	136	107	1823	1738	2912	2634	3442	3110	3317	3543	302	218	315	188	121	124	2730	1768	2083	2407	3364	3356	73	46	1824
650	Positive	1.175	198.87547	Unknown	[M+H]+	null	null	null	null	null	2977	3178	3214	3289	2179	2437	2667	1896	3501	3234	2190	3705	3222	3083	8	2429	9547	8756	7334	8310	8357	8559	8871	8786	3002	2924	2812	2928	1769	3225	0	6779	9186	8061	9664	8693	3464	2882	7291
651	Positive	0.909	198.87706	Unknown	[M+H]+	null	null	null	null	null	4	5	136	268	83	86	229	228	162	5	248	289	120	138	73	38	1213	149	244	386	150	538	588	529	127	82	0	82	205	208	2381	544	405	377	552	774	23	10	948
652	Positive	1.101	198.87711	Unknown	[M+H]+	null	null	null	null	null	3330	3379	3383	3447	2398	2711	2944	3215	3722	3418	4064	3879	3261	3135	28	160	9601	8837	7370	8423	8355	8591	8975	8965	3304	3158	2835	2945	3543	3248	0	6821	9273	8228	9807	9042	340	249	7348
653	Positive	0.410	198.93939	Unknown	[M+H]+	null	null	null	null	null	0	13	8	7	0	9	0	0	0	11	0	0	0	6	127	1548	133	163	82	97	87	82	94	20	0	9	6	0	0	6	101	84	142	114	164	76	1297	1856	100
654	Positive	0.731	198.93965	Unknown	[M+H]+	null	null	null	null	null	6	0	6	8	0	9	0	0	1	5	0	5	1	9	2091	642	127	8	149	70	93	88	104	77	0	5	9	8	12	17	244	104	158	121	84	124	389	281	162
655	Positive	0.441	199.08554	low score: Azobenzol	[M+H]+	199.08659	C12H10N2O	Benzene and substituted derivatives	GAUZCKBSTZFWCT-UHFFFAOYSA-N	c1(\[N+](=N\c2ccccc2)[O-])ccccc1	21	14	25	16	12	8	14	24	17	6	20	18	17	9	91	44	1406	1043	679	842	731	1167	991	1331	21	12	29	19	27	21	30	1859	1043	782	878	1020	65	105	746
656	Positive	12.617	199.18277	no MS2: Pesticide3_Cycluron_C11H22N2O_3-Cyclooctyl-1,1-dimethylurea	[M+H]+	199.18050	C11H22N2O	Ureas	DQZCVNGCTZLGAQ-UHFFFAOYSA-N	CN(C)C(=O)NC1CCCCCCC1	1810	2079	2060	1954	1992	1977	1663	1804	1970	1571	1847	1846	1917	1950	1090	660	2395	2864	3892	4168	3562	3261	4188	4301	1777	1595	1740	1980	2018	1987	2413	2771	3447	3651	3187	3255	929	806	3458
657	Positive	13.804	199.18466	no MS2: Pesticide3_Cycluron_C11H22N2O_3-Cyclooctyl-1,1-dimethylurea	[M+H]+	199.18050	C11H22N2O	Ureas	DQZCVNGCTZLGAQ-UHFFFAOYSA-N	CN(C)C(=O)NC1CCCCCCC1	1543	1880	2074	1844	1834	1933	1998	1925	1978	1773	1826	1652	2104	1993	664	1128	2785	2624	4473	4346	3771	3912	4419	4537	1849	1738	1976	2065	2101	2086	2410	2905	3801	3587	3482	3760	658	786	3434
658	Positive	1.244	200.04034	no MS2: N-FORMYL-L-METHIONINE	[M+2Na-H]+	200.03519	C6H11NO3S	Methionine and derivatives	PYUSHNKNPOHWEZ-RXMQYKEDSA-N	O=C(O)C(N=CO)CCSC	26	5	7	10	23	32	12	32	22	22	20	5	68	21	5	2930	492	426	129	157	249	448	317	717	14	12	15	29	25	17	8	288	512	326	206	241	2540	2680	220
659	Positive	1.041	200.05441	no MS2: 2-Methylnaphtho(1,2-d)thiazole	[M+H]+	200.05284	C12H9NS	Naphthothiazoles	OUXMJRMYZCEVKO-UHFFFAOYSA-N	CC1=NC2=C(S1)C=CC1=CC=CC=C21	1403	1306	1477	1315	1228	1167	1170	1066	1407	1234	1311	1460	1288	1378	2	172	4236	3698	5183	5013	5973	6394	5842	5720	1726	1721	2470	1651	1286	1069	17	5891	6729	6671	4768	5551	235	238	3454
660	Positive	1.146	200.05453	no MS2: 2-Methylnaphtho(1,2-d)thiazole	[M+H]+	200.05284	C12H9NS	Naphthothiazoles	OUXMJRMYZCEVKO-UHFFFAOYSA-N	CC1=NC2=C(S1)C=CC1=CC=CC=C21	792	781	766	748	534	580	831	689	735	882	780	823	820	823	3	544	5079	4931	5110	4965	5920	6228	5917	5767	1008	952	643	914	680	820	0	5834	6669	6686	4861	5454	160	163	4867
661	Positive	0.819	200.05493	no MS2: 2-Methylnaphtho(1,2-d)thiazole	[M+H]+	200.05284	C12H9NS	Naphthothiazoles	OUXMJRMYZCEVKO-UHFFFAOYSA-N	CC1=NC2=C(S1)C=CC1=CC=CC=C21	6	11	6	10	15	5	2	9	0	9	13	16	3	8	2828	9	8	13	21	11	7	1	39	10	11	13	5	11	10	8	6837	5	17	2	16	2	56	25	57
662	Positive	1.163	200.08194	no MS2: Pelletierine Hydrochloride	[M+Na]+	200.08127	C8H16ClNO	Piperidines	FMOKUKPRJSMPOI-UHFFFAOYSA-N	Cl.O=C(C)CC1NCCCC1	403	100	124	111	41	157	73	219	112	134	433	100	238	77	33	88	859	749	1076	931	724	982	896	828	526	189	283	516	255	106	31	799	840	534	1222	1006	144	90	2024
663	Positive	1.183	200.87361	Unknown	[M+H]+	null	null	null	null	null	910	950	857	842	361	228	745	374	929	395	1117	1093	995	853	5	46	2418	1528	1186	1959	2542	2443	2917	2425	747	272	265	851	1188	313	5	1376	1562	1726	2076	2005	75	109	1605
664	Positive	1.091	200.87561	Unknown	[M+H]+	null	null	null	null	null	923	988	902	862	372	799	777	993	977	1058	1175	1122	1001	860	2	29	2441	1660	1171	1977	2583	2357	2940	2472	804	640	879	838	1198	1062	0	1434	1624	522	2062	2052	29	41	1595
665	Positive	0.793	201.02238	low score: Meglutol	[M+K]+	201.01598	C6H10O5	Hydroxy fatty acids	NPOAOTPXWNWTSH-UHFFFAOYSA-N	O=C(O)CC(O)(C)CC(=O)O	18	7	17	22	10	18	21	19	21	11	10	16	24	40	131	130	1355	1322	941	1041	782	750	602	510	16	15	30	21	25	24	698	1547	861	947	634	654	162	166	1119
666	Positive	9.612	201.14235	Unknown	[M+H]+	null	null	null	null	null	116	37	22	124	65	58	88	26	49	68	25	120	77	38	60	81	161	202	389	283	234	222	414	562	75	131	97	32	72	62	71	239	154	263	152	286	65	48	156
667	Positive	1.138	202.17880	no MS2: 11-aminoundecanoicacid	[M+H]+	202.18016	C11H23NO2	Medium-chain fatty acids	GUOSQNAUYHMCRU-UHFFFAOYSA-N	NCCCCCCCCCCC(O)=O	46	54	89	93	80	59	54	36	65	51	46	46	189	139	4353	1363	446	450	157	72	126	200	170	212	49	27	91	62	97	91	565	129	191	269	134	174	1830	1687	154
668	Positive	1.140	202.19753	Unknown	[M+H]+	null	null	null	null	null	2175	1644	12382	13038	4150	4056	4380	4267	4844	4512	3430	3416	3406	3321	157	33	6415	5558	1590	1879	1719	1983	2179	3338	4160	3889	4188	3343	2408	2597	12974	1538	1117	1876	1743	1574	58	85	1838
669	Positive	1.032	202.44414	Unknown	[M+H]+	null	null	null	null	null	241	253	181	179	147	326	314	199	187	193	297	269	134	154	5	61	2448	1329	1503	1541	1666	1686	2178	2328	264	243	178	157	186	201	97	1363	1211	1462	1096	1151	77	8	1622
670	Positive	1.149	202.44736	Unknown	[M+H]+	null	null	null	null	null	174	269	95	220	61	276	78	211	160	200	164	136	133	147	0	42	2461	1271	1598	1910	1599	1607	2032	2187	262	256	177	145	189	210	16	894	1620	1710	2226	2212	20	24	1654
671	Positive	0.909	202.44844	Unknown	[M+H]+	null	null	null	null	null	38	84	5	28	150	4	332	58	59	71	65	68	21	6	133	25	345	165	490	492	434	643	828	837	25	25	4	35	44	51	2280	1289	273	557	419	1101	30	22	693
672	Positive	0.479	202.81427	Unknown	[M+H]+	null	null	null	null	null	0	0	6	0	8	0	0	0	8	6	0	0	0	0	5	0	1007	724	314	446	438	586	633	561	9	0	21	6	0	6	113	1035	360	476	525	766	0	6	745
673	Positive	0.441	202.87068	Unknown	[M+H]+	null	null	null	null	null	14	0	0	0	0	12	0	0	7	6	0	6	12	15	12	1052	27	34	16	21	44	27	68	41	0	0	0	6	7	6	13	28	8	7	79	24	1642	834	25
674	Positive	0.870	203.05156	low score: PSICOSE	[M+Na]+	203.05261	C6H12O6	Monosaccharides	LKDRXBCSQODPBY-UHFFFAOYSA-N	C1C(C(C(C(O1)(CO)O)O)O)O	25	10	55	21	58	13	11	9	18	59	47	24	76	19	231284	37431	203	157	643	219	172	989	161	805	23	34	8	165	85	123	15586	961	148	698	851	1382	98082	36056	1040
675	Positive	1.103	203.06609	7-hydroxy-2,3-dihydrocyclopenta[c]chromen-4(1H)-one	[M+H]+	203.07001	C12H10O3	Coumarins and derivatives	HLHZQJPJPNQANY-UHFFFAOYSA-N	O=C1OC=2C=C(O)C=CC2C3=C1CCC3	104726	100638	85602	88177	100919	101563	102874	97091	105148	105350	121438	115921	74449	74525	174	124911	402174	398289	407000	452939	342219	346539	411740	409167	92941	91793	114513	87566	105070	101635	4230	328005	362245	347509	377210	354300	188119	196746	364521
676	Positive	0.909	203.06720	low score: 7-hydroxy-2,3-dihydrocyclopenta[c]chromen-4(1H)-one	[M+H]+	203.07001	C12H10O3	Coumarins and derivatives	HLHZQJPJPNQANY-UHFFFAOYSA-N	O=C1OC=2C=C(O)C=CC2C3=C1CCC3	35	22	10300	18623	11383	32	30	21404	16079	23319	19654	20094	9962	9317	22962	12142	71536	29081	81556	93763	77451	101368	125879	115920	13269	11491	28	10772	17741	20859	337184	112009	83350	90681	103207	132369	35797	30081	112832
677	Positive	1.163	203.09250	no MS2: Metamitron	[M+H]+	203.09274	C10H10N4O	1,2,4-triazines	VHCNQEUWZYOAEV-UHFFFAOYSA-N	CC1=NN=C(C(=O)N1N)c1ccccc1	1226	1610	1004	1402	678	700	1207	905	1508	1556	1874	1070	493	513	97	171	9737	10418	11044	12817	10434	9891	12716	14280	1184	928	960	336	741	817	406	10236	10625	10906	11284	11971	269	243	12487
678	Positive	6.489	203.13348	low score: Alanylleucine (isomer of 674)	[M+H]+	203.13902	C9H18N2O3	Peptides	RDIKFPRVLJLMER-UHFFFAOYSA-N	O=C(O)C(NC(=O)C(N)C)CC(C)C	84	76	72	86	121	73	71	74	107	93	92	54	80	75	125	158	5031	5101	4820	4657	5551	5680	5856	5896	86	113	137	85	124	87	8741	5355	4663	4712	5996	6041	153	189	5038
679	Positive	7.706	203.13803	low score: Alanylleucine (isomer of 674); PlaSMA ID-675	[M+H]+	203.13940	C9H18N2O3	Dipeptides	RDIKFPRVLJLMER-UHFFFAOYNA-N	O=C(O)C(NC(=O)C(N)C)CC(C)C	722	785	155	146	160	244	93	88	108	142	124	184	98	116	245	265	850	1179	1166	1352	1146	1444	1289	1612	136	163	643	57	62	112	657	995	1374	1494	1267	1325	317	298	1248
680	Positive	1.213	203.15018	low score: N,N-Dimethylarginine	[M+2H]2+	203.15025	C8H18N4O2	Arginine and derivatives	YDGMGEXADBMOMJ-LURJTMIESA-N	O=C(O)C(N)CCCNC(=N)N(C)C	113	150	248	249	224	149	246	225	163	198	234	238	308	262	159	1965	349	353	560	566	399	304	402	392	224	163	145	297	247	255	415	447	364	413	433	458	2656	1827	314
681	Positive	1.086	203.17105	no MS2: NCGC00381391-01_C11H22O3_1-(2-Hydroxyethyl)-2,2,6-trimethyl-1,4-cyclohexanediol	[M+H]+	203.16417	C11H22O3	Cyclohexanols	QXUANCZURDYUIT-UHFFFAOYSA-N	CC1CC(O)CC(C)(C)C1(O)CCO	1608	1543	1885	1715	1451	1727	1461	1552	1561	1664	1899	1883	1551	1818	361	75	776	801	1067	1629	910	1065	1054	1082	2010	2117	1230	1432	1278	1428	107	1042	1234	1062	1258	1133	100	76	1067
682	Positive	0.389	203.24190	Unknown	[M+H]+	null	null	null	null	null	565	1301	1320	1533	713	2347	1547	2778	1101	1167	1801	1258	679	800	0	32	0	0	8	0	0	8	11	0	1230	708	2469	1789	1070	519	5	0	8	9	0	0	0	0	0
683	Positive	1.049	203.51807	Unknown	[M+H]+	null	null	null	null	null	180	247	117	233	395	237	134	69	123	144	46	220	215	113	114	0	65	133	242	61	39	12	89	179	60	172	84	110	112	104	1620	231	107	66	13	136	0	13	134
684	Positive	1.140	204.06979	no MS2: alpha-oxo-1h-indole-3-propanoic acid	[M+H]+	204.07899	C11H9NO3	Indolyl carboxylic acids and derivatives	RSTKLPZEZYGQPY-UHFFFAOYSA-N	O=C(O)C(=O)CC1=CNC=2C=CC=CC21	6670	6789	5017	6266	4517	6955	6553	6754	7266	6963	7826	7775	5377	5513	1199	1700	31571	30122	29929	34081	26422	26449	31826	30546	6935	6260	7260	4028	7409	7021	2465	25447	26942	25761	28923	26648	3110	2663	27513
685	Positive	1.061	204.07219	no MS2: alpha-oxo-1h-indole-3-propanoic acid	[M+H]+	204.07001	C11H9NO3	Indolyl carboxylic acids and derivatives	RSTKLPZEZYGQPY-UHFFFAOYSA-N	O=C(O)C(=O)CC1=CNC=2C=CC=CC21	7402	7516	6674	6725	7797	7933	7435	7290	8010	7383	8742	8382	5484	5537	900	791	32013	30620	30167	34831	26687	27021	32410	31938	7823	7122	7368	6210	7510	7003	1048	26079	27551	25938	29507	25928	972	1237	28187
686	Positive	1.052	204.12283	O-ACETYLCARNITINE	[M+H]+	204.12303	C9H17NO4	Acyl carnitines	RDHQFKQIGNGIED-UHFFFAOYSA-N	CC(=O)OC(CC([O-])=O)C[N+](C)(C)C	698	860	996	879	1468	1505	1005	939	602	739	834	1085	4717	6114	209226	44116	2762	5846	6548	5841	4458	4213	4527	3463	985	767	1796	4019	4171	3981	12179	5669	3623	3713	4121	4583	31572	29812	4707
687	Positive	1.198	204.13663	O-ACETYLCARNITINE	[M+H]+	204.12303	C9H17NO4	Acyl carnitines	RDHQFKQIGNGIED-UHFFFAOYSA-N	CC(=O)OC(CC([O-])=O)C[N+](C)(C)C	112389	120635	120297	130428	128122	121947	112275	115704	111342	107381	103244	109974	105137	111265	546	98263	89674	96433	99991	111320	78770	88864	97228	108584	126125	126766	182121	108933	105830	107064	5147	109844	66167	61418	112850	108045	54295	45934	123354
688	Positive	9.813	204.15273	Unknown	[M+H]+	null	null	null	null	null	63	64	75	58	47	50	104	73	5	95	88	25	60	64	88	98	1342	1196	2082	2179	2277	2365	2446	2560	57	112	53	43	105	143	1336	1136	1626	1773	2471	2320	178	127	1458
689	Positive	0.428	204.90413	Unknown	[M+H]+	null	null	null	null	null	8	0	0	17	6	0	0	8	0	10	0	8	0	0	12	9	1073	892	647	168	738	804	816	1047	0	9	7	6	0	0	120	1550	493	754	425	516	62	99	1008
690	Positive	1.143	205.02647	low score: Mandelic Acid, Methyl Ester	[M+K]+	205.02614	C9H10O3	Benzene and substituted derivatives	ITATYELQCJRCCK-UHFFFAOYSA-N	O=C(OC)C(O)C=1C=CC=CC1	5	4	0	19	0	20	4	11	0	15	8	14	22	0	6070	12	53	171	64	26	74	80	94	142	19	22	34	6	24	1	570	116	60	21	172	22	14	4	127
691	Positive	1.166	205.04210	low score: Homovanillic acid	[M+Na]+	205.03999	C9H10O4	Methoxyphenols	QRMZSPFSDQBLIX-UHFFFAOYSA-N	O=C(O)CC1=CC=C(O)C(OC)=C1	19	31	6	14	19	27	0	4	0	26	8	9	19	0	1362	125	79	188	117	11	75	138	123	547	27	36	49	20	25	5	14124	80	61	8	229	77	104	219	97
692	Positive	1.055	205.07208	low score: 1-(4-methoxyphenyl)propane-1,2-diol	[M+Na]+	205.08351	C10H14O3	Phenylpropanes	MRDZSBVJWOXBRW-UHFFFAOYSA-N	OC(C1=CC=C(OC)C=C1)C(O)C	1954	2162	1720	1488	1676	1936	1622	1757	2061	2080	1989	1829	1172	1476	1324	972	8069	8082	7762	8117	7170	5812	8394	9196	2300	2262	2010	1788	1799	1932	427	6928	6813	5864	7126	5925	1573	1354	5699
693	Positive	1.145	205.07213	no MS2: Harmane	[M+Na]+	205.07362	C12H10N2	Harmala alkaloids	PSFDQSOCUJVVGF-UHFFFAOYSA-N	N=1C=CC=2C=3C=CC=CC3NC2C1C	1100	1524	1312	1380	1663	1287	1160	1112	1598	1694	1713	1684	1433	1573	1324	1317	7492	7589	7881	7895	7299	5956	8394	7575	1599	1651	2123	1788	1776	1749	680	6528	7058	6277	7114	5917	1573	1369	5883
694	Positive	3.925	205.08482	low score: Levamisole	[M+H]+	205.07939	C11H12N2S	Imidazothiazoles	HLFSDGLLUJUHTE-SNVBAGLBSA-N	c(c3)ccc(c3)C(C1)N=C(S2)N(CC2)1	103	107	106	91	116	146	164	117	135	128	116	138	375	305	10992	8900	410	534	387	569	715	529	658	467	159	167	550	483	605	541	770	365	354	600	689	690	8333	8333	588
695	Positive	10.617	205.08496	low score: 1-(4-methoxyphenyl)propane-1,2-diol	[M+Na]+	205.08351	C10H14O3	Phenylpropanes	MRDZSBVJWOXBRW-UHFFFAOYSA-N	OC(C1=CC=C(OC)C=C1)C(O)C	96	97	63	92	73	56	75	117	69	49	79	44	148	276	18929	17268	764	939	1102	946	1021	751	828	480	80	68	524	324	395	499	781	503	448	1028	732	830	15253	16456	694
696	Positive	8.772	205.08589	low score: Angelic anhydride	[M+Na]+	205.08000	C10H14O3	Dicarboxylic acids and derivatives	LIHLSLRANKCHLV-SFECMWDFSA-N	O=C(OC(=O)C(=CC)C)C(=CC)C	100	60	13	50	196	50	50	129	228	50	274	181	508	816	15649	15271	1098	880	1203	688	650	1268	1265	1474	189	137	389	269	431	624	781	1057	1048	1207	1015	1285	12842	13389	1319
697	Positive	6.549	205.08684	no MS2: NCGC00380309-01_C12H14O4_(7R,8R)-7,8-Dihydroxy-3,5,7-trimethyl-7,8-dihydro-6H-isochromen-6-one	[M-H2O+H]+	205.08592	C12H14O4	Azaphilones	JVUYBLROBHJEJN-NEPJUHHUSA-N	CC/1=C/C/2=C(C)/C(=O)[C@](C)(O)[C@H](O)C2=C\O1	161	279	283	447	183	323	343	327	408	426	226	425	1541	1327	13670	13206	1520	2325	2986	2463	3030	2432	2598	1625	273	342	1805	1967	2160	1765	2363	1327	1737	1788	1869	2537	12826	12516	1882
698	Positive	4.535	205.09705	no MS2: L-Tryptophan; CE0; QIVBCDIJIAJPQS-VIFPVBQESA-N	[M+H]+	205.09715	C11H12N2O2	Indolyl carboxylic acids and derivatives	QIVBCDIJIAJPQS-VIFPVBQESA-N	c1ccc2c(c1)c(C[C@@H](C(=O)O)N)c[nH]2	9829	9589	10109	11259	9178	9852	10641	10340	10156	10806	9414	10911	12054	12197	15282	3403	8258	7729	9162	8304	9346	7997	9288	8717	10939	10170	12461	13403	13515	11735	7857	6879	9584	8445	8320	8006	3398	3736	8176
699	Positive	1.507	205.09737	low score: Tryptophan	[M+H]+	205.09715	C11H12N2O2	Indolyl carboxylic acids and derivatives	QIVBCDIJIAJPQS-VIFPVBQESA-N	O=C(O)C(N)CC1=CNC=2C=CC=CC21	13016	11771	14920	14925	11641	12030	14062	12222	13543	14864	13115	13974	15289	14927	2582	6485	9106	9356	9993	9340	10227	10303	9401	10606	12711	11219	17454	14686	14824	15603	6989	8224	11502	8792	10458	11097	10534	9025	9460
700	Positive	14.318	205.09850	no MS2: Tryptophan; PlaSMA ID-689	[M+H]+	205.09750	C11H12N2O2	Indole and derivatives	QIVBCDIJIAJPQS-UHFFFAOYNA-N	O=C(O)C(N)CC2=CNC=1C=CC=CC=12	10265	9702	10522	10284	11174	10066	10722	12046	10349	10104	10855	10302	11373	11086	3948	3305	13928	16016	17605	19401	16652	16468	17130	16419	10519	10437	11557	11773	11215	11698	12178	14977	16115	16757	16030	18051	4162	1916	14939
701	Positive	13.509	205.09904	no MS2: Tryptophan; PlaSMA ID-689	[M+H]+	205.09750	C11H12N2O2	Indole and derivatives	QIVBCDIJIAJPQS-UHFFFAOYNA-N	O=C(O)C(N)CC2=CNC=1C=CC=CC=12	11360	12479	11578	10851	11062	11512	11931	10931	12376	10785	11006	10146	12587	12149	2283	2804	13412	14736	17002	17282	17417	15549	17730	17058	11640	11524	11674	12621	12506	11881	14298	13630	15064	16631	14752	17916	2451	1450	14943
702	Positive	12.617	205.09909	no MS2: Tryptophan; PlaSMA ID-689	[M+H]+	205.09750	C11H12N2O2	Indole and derivatives	QIVBCDIJIAJPQS-UHFFFAOYNA-N	O=C(O)C(N)CC2=CNC=1C=CC=CC=12	10786	12194	11173	10902	9639	11127	11939	11339	11960	11942	11543	10469	12387	11578	2202	4110	12230	12700	15006	16920	15090	13695	15718	15490	11558	11470	11561	11560	12707	11416	11592	11483	13362	14750	13772	16833	2697	1984	12241
703	Positive	10.547	205.09981	low score: Tryptophan	[M+H]+	205.09715	C11H12N2O2	Indolyl carboxylic acids and derivatives	QIVBCDIJIAJPQS-UHFFFAOYSA-N	C1=CC=C2C(=C1)C(=CN2)CC(C(=O)O)N	11824	12052	12147	11819	12688	12973	12059	12028	11967	13692	13052	13163	13478	13531	2797	2720	14141	13426	15751	13965	16518	13951	15567	16265	12697	11556	13630	11403	13299	12657	14139	13056	13891	15500	16078	17764	3109	3023	12454
704	Positive	0.029	205.09984	no MS2: Tryptophan; PlaSMA ID-689	[M+H]+	205.09750	C11H12N2O2	Indole and derivatives	QIVBCDIJIAJPQS-UHFFFAOYNA-N	O=C(O)C(N)CC2=CNC=1C=CC=CC=12	9561	10104	10350	9952	9731	10515	9420	10638	10144	11505	10556	11042	11770	12044	1527	1760	11733	10803	10918	10394	11913	12056	12074	12810	9779	9562	12505	11130	11808	11726	8073	8923	12745	10936	13730	13047	1682	1640	10974
705	Positive	9.045	205.09996	low score: Tryptophan	[M+H]+	205.09715	C11H12N2O2	Indolyl carboxylic acids and derivatives	QIVBCDIJIAJPQS-UHFFFAOYSA-N	C1=CC=C2C(=C1)C(=CN2)CC(C(=O)O)N	12815	13069	13498	14132	14075	13331	13576	12545	13522	14777	14959	14854	14219	13550	2635	2446	12127	10203	12501	10339	10924	13914	10116	12099	13223	13394	10880	12280	13270	14086	11298	11467	13016	12262	12668	15290	2740	2398	10432
706	Positive	0.576	205.10057	no MS2: Tryptophan; PlaSMA ID-689	[M+H]+	205.09750	C11H12N2O2	Indole and derivatives	QIVBCDIJIAJPQS-UHFFFAOYNA-N	O=C(O)C(N)CC2=CNC=1C=CC=CC=12	15600	14022	16027	13876	14334	14556	16144	15181	14854	16283	14500	15831	15783	16116	1193	1449	9852	10576	10526	10630	10905	11191	10877	10776	14861	15742	17299	15513	15328	15414	8032	9333	11931	9999	11076	12232	1642	1290	11101
707	Positive	0.845	205.10071	low score: Tryptophan	[M+H]+	205.09715	C11H12N2O2	Indolyl carboxylic acids and derivatives	QIVBCDIJIAJPQS-UHFFFAOYSA-N	C1=CC=C2C(=C1)C(=CN2)CC(C(=O)O)N	13142	13591	14680	15693	15754	16192	16571	16365	16643	14996	16116	16832	17831	17157	278	1030	8226	8920	8244	8075	8841	8721	8570	8483	13155	15817	17822	16614	16123	17344	2150	7293	10066	7719	8801	8856	1540	1018	9315
708	Positive	6.444	205.10081	no MS2: Tryptophan; PlaSMA ID-689	[M+H]+	205.09750	C11H12N2O2	Indole and derivatives	QIVBCDIJIAJPQS-UHFFFAOYNA-N	O=C(O)C(N)CC2=CNC=1C=CC=CC=12	21148	20164	20357	20218	21015	19357	20626	20199	19856	21505	19762	19645	18426	20659	1713	1674	16189	14760	16494	12974	16243	14651	15731	14500	21546	20748	20615	20042	19437	19964	12660	12800	15326	13071	15454	14951	1448	2050	13222
709	Positive	6.045	205.10155	low score: Tryptophan	[M+H]+	205.09715	C11H12N2O2	Indolyl carboxylic acids and derivatives	QIVBCDIJIAJPQS-UHFFFAOYSA-N	C1=CC=C2C(=C1)C(=CN2)CC(C(=O)O)N	16555	17484	18712	18538	20882	17236	18158	19159	18038	17853	18515	17549	20366	22647	842	1245	11214	10229	12452	10192	12314	9908	11285	10227	20218	18171	20942	21298	21330	20685	9166	8904	11268	9156	11185	10054	864	886	9773
710	Positive	6.307	205.10350	no MS2: Tryptophan; PlaSMA ID-689	[M+H]+	205.09750	C11H12N2O2	Indole and derivatives	QIVBCDIJIAJPQS-UHFFFAOYNA-N	O=C(O)C(N)CC2=CNC=1C=CC=CC=12	21979	20865	22378	21561	22107	20162	21411	21077	21530	22925	21731	21238	19975	21102	471	621	14042	15203	16745	14359	15312	14633	15861	14577	22513	21947	20412	20090	19602	20108	12794	12550	15669	12281	14977	14995	488	452	13158
711	Positive	8.447	205.10396	low score: Tryptophan	[M+H]+	205.09715	C11H12N2O2	Indolyl carboxylic acids and derivatives	QIVBCDIJIAJPQS-UHFFFAOYSA-N	C1=CC=C2C(=C1)C(=CN2)CC(C(=O)O)N	14870	15564	15921	15335	15670	15445	16702	15646	15508	16962	16178	17295	14043	15003	628	505	13609	14248	13216	12186	12777	13231	13915	12954	16240	15497	14170	13953	14266	15588	11328	12324	13276	12913	14081	15928	730	604	11637
712	Positive	0.746	205.10435	low score: Tryptophan	[M+H]+	205.09715	C11H12N2O2	Indolyl carboxylic acids and derivatives	QIVBCDIJIAJPQS-UHFFFAOYSA-N	C1=CC=C2C(=C1)C(=CN2)CC(C(=O)O)N	17780	15905	17619	16732	16428	17198	17297	16892	17467	18915	17194	18154	17683	15797	251	350	10410	10835	10675	9493	10306	9787	9721	9631	16195	16330	17856	16696	16262	15234	7776	9848	11136	9020	10820	10718	381	270	10485
713	Positive	17.801	205.10463	no MS2: MMV393995	[M+H]+	205.10838	C10H12N4O	Pyrimidones	XIFVEJXUSTTZKD-UHFFFAOYSA-N	OC=1N=C(N=C(C1)C)N2N=C(C=C2C)C	11446	10992	11428	11257	11725	12044	11523	11572	10830	10997	11419	11878	11423	11724	397	566	13689	10077	13826	12665	15276	14040	16074	15780	11557	16681	12015	11032	11055	11899	10611	13350	12892	13503	15050	15981	508	514	13635
714	Positive	6.776	205.10477	no MS2: MMV393995	[M+H]+	205.10838	C10H12N4O	Pyrimidones	XIFVEJXUSTTZKD-UHFFFAOYSA-N	OC=1N=C(N=C(C1)C)N2N=C(C=C2C)C	20772	19422	21873	20389	21177	19944	20441	19431	21869	22587	19802	21977	17460	20867	283	377	15418	15624	14964	12647	15642	14851	16100	14148	22225	21001	18887	18956	18724	18717	12202	12587	14521	12302	16756	15672	313	456	13047
715	Positive	2.105	205.10506	no MS2: MMV393995	[M+H]+	205.10838	C10H12N4O	Pyrimidones	XIFVEJXUSTTZKD-UHFFFAOYSA-N	OC=1N=C(N=C(C1)C)N2N=C(C=C2C)C	19009	19238	19714	20869	19362	19968	22076	20235	21238	22891	19957	21789	21192	20629	236	325	9339	9467	9137	10085	10356	9108	8805	10246	20740	19874	20690	19403	20638	20198	7807	7666	12164	7761	9913	9726	230	300	9418
716	Positive	1.808	205.10544	low score: Tryptophan	[M+H]+	205.09715	C11H12N2O2	Indolyl carboxylic acids and derivatives	QIVBCDIJIAJPQS-UHFFFAOYSA-N	O=C(O)C(N)CC1=CNC=2C=CC=CC21	19878	19120	18878	19272	18459	20872	21147	18826	20304	20818	19707	20482	18062	17735	165	442	10135	10658	10529	10455	11712	11177	10081	11456	18766	19416	18786	16242	17672	16950	7474	9428	12176	9439	10654	11718	308	186	11011
717	Positive	11.053	205.10608	low score: Tryptophan	[M+H]+	205.09715	C11H12N2O2	Indolyl carboxylic acids and derivatives	QIVBCDIJIAJPQS-UHFFFAOYSA-N	C1=CC=C2C(=C1)C(=CN2)CC(C(=O)O)N	16397	16404	16603	17295	16042	17372	17114	16577	15877	16866	17412	17607	15973	15309	298	216	12116	12379	11672	12579	13548	13160	13400	12135	18578	17025	13339	15367	15661	15253	11604	10906	12316	12989	12465	15511	325	373	10745
718	Positive	6.229	205.10617	no MS2: MMV393995	[M+H]+	205.10838	C10H12N4O	Pyrimidones	XIFVEJXUSTTZKD-UHFFFAOYSA-N	OC=1N=C(N=C(C1)C)N2N=C(C=C2C)C	21552	20942	22481	21569	22423	20335	21572	21065	21659	23018	21725	21394	19308	20207	291	226	12838	14650	14701	14077	14192	12209	13357	12156	23310	22163	19919	19558	20022	19471	11160	12166	15075	11890	14504	11970	265	287	12572
719	Positive	1.196	205.11194	low score: MMV393995	[M+H]+	205.10838	C10H12N4O	Pyrimidones	XIFVEJXUSTTZKD-UHFFFAOYSA-N	OC=1N=C(N=C(C1)C)N2N=C(C=C2C)C	7158	7361	9304	8924	7448	8574	7423	7410	8541	8036	7206	7892	5303	4821	128	9589	9607	9737	9732	9523	8492	8383	9588	10832	8578	7859	10486	6072	6110	5926	3777	9474	9831	9149	7526	8060	5108	4245	12548
720	Positive	3.427	205.11272	low score: 1-[4-hydroxy-3-(3-methylbut-2-enyl)phenyl]ethanone	[M+NH4]+	205.12230	C13H16O2	Alkyl-phenylketones	QJAPFSSVKIZTMR-UHFFFAOYSA-N	O=C(C1=CC=C(O)C(=C1)CC=C(C)C)C	10138	9051	10626	11991	10150	11184	10454	10156	10898	10887	10808	10824	6110	5887	129	102	3275	3607	4226	3288	4544	2860	3070	3930	10670	10948	4181	4984	7523	6132	22502	2628	4696	2639	3896	3174	73	93	3083
721	Positive	1.166	206.00082	Unknown	[M+H]+	null	null	null	null	null	2	0	14	19	18	40	10	13	0	1	8	4	11	7	63	1	22	0	47	0	59	44	10	30	16	0	20	6	8	12	1374	20	41	21	24	122	13	0	228
722	Positive	1.198	206.06767	low score: (+/-)-alpha-lipoic acid amide	[M+H]+	206.07001	C8H15NOS2	Lipoamides	FCCDDURTIIUXBY-SSDOTTSWSA-N	O=C(N)CCCCC1SSCC1	250	256	615	627	1102	1009	602	616	447	413	438	353	520	515	65	258	498	504	472	758	437	360	431	646	1128	1241	405	1409	216	216	244	1455	376	472	1074	864	56	134	712
723	Positive	1.058	206.07117	no MS2: (+/-)-alpha-lipoic acid amide	[M+H]+	206.07001	C8H15NOS2	Lipoamides	FCCDDURTIIUXBY-SSDOTTSWSA-N	O=C(N)CCCCC1SSCC1	306	148	342	334	646	687	322	264	311	269	314	293	326	273	129	90	212	313	397	344	247	206	476	219	587	508	1206	569	245	251	237	481	209	250	459	367	145	131	421
724	Positive	1.365	206.08708	no MS2: CBDZ-M	[M+H]+	206.09241	C10H11N3O2	2-benzimidazolylcarbamic acid esters	OKOVSTKGUBOSTB-UHFFFAOYSA-N	O=C(NC1=NC2=CC=CC=C2N1)OCC	19	64	60	38	75	123	98	52	88	60	70	58	119	74	1079	1712	154	172	144	182	113	179	123	117	115	92	55	69	87	81	99	214	244	151	169	208	1325	997	136
725	Positive	6.096	206.10321	no MS2: 1-phenylisoquinoline	[M+H]+	206.09642	C15H11N	Phenylpyridines	LPCWDYWZIWDTCV-UHFFFAOYSA-N	C12=CC=CC=C1C=CN=C2C3=CC=CC=C3	2338	2410	2418	2658	2779	2384	2462	2479	2560	2588	2328	2578	2964	3026	262	377	1523	1712	1489	1449	1898	1741	1724	1320	2627	2337	2877	2875	2869	2715	1268	1519	1678	1279	1686	1634	251	213	1369
726	Positive	1.256	206.10564	no MS2: 1-phenylisoquinoline	[M+H]+	206.09642	C15H11N	Phenylpyridines	LPCWDYWZIWDTCV-UHFFFAOYSA-N	C12=CC=CC=C1C=CN=C2C3=CC=CC=C3	1472	1798	1515	1510	1508	1897	1352	1410	1975	1524	1298	1438	1551	1452	96	537	1685	1409	1197	1510	1389	1406	1425	1542	1559	1418	2158	1458	1420	1514	1247	1172	1653	1104	1160	1404	243	373	1630
727	Positive	0.419	206.15387	Unknown	[M+H]+	null	null	null	null	null	107	181	144	140	130	102	154	160	136	134	113	122	92	138	46	55	3764	4469	3939	5754	5443	6277	6994	7456	190	96	145	78	152	102	42	3920	5518	5960	6943	5416	40	41	4602
728	Positive	1.104	206.89328	Unknown	[M+H]+	null	null	null	null	null	28	72	58	65	49	48	47	63	49	34	51	58	135	177	24	4343	926	736	1513	1503	1478	1329	1507	1237	37	60	154	145	189	162	27	1137	1142	1093	996	1247	7945	7277	1173
729	Positive	1.074	206.90871	Unknown	[M+H]+	null	null	null	null	null	3848	3776	3937	3744	3183	3396	3706	3782	4157	3922	4637	4366	3458	3548	8	365	14392	15404	14913	16461	15715	15461	17015	14426	3336	3492	3743	3245	3984	3570	20	12546	15798	15030	15563	15162	1069	888	15855
730	Positive	0.885	206.90921	Unknown	[M+H]+	null	null	null	null	null	4	94	41	3	46	75	105	24	80	146	131	152	64	5	37	318	761	100	777	817	735	1011	1176	157	9	36	4	35	69	119	4453	960	793	150	973	1586	186	193	490
731	Positive	0.652	206.91562	Unknown	[M+H]+	null	null	null	null	null	0	16	0	7	9	6	6	12	6	6	14	12	1	10	1227	245	88	139	186	188	103	114	74	119	6	8	5	0	13	5	100	200	151	93	109	59	3320	4952	175
732	Positive	1.147	207.02811	low score: Methyl gallate	[M+Na]+	207.02000	C8H8O5	Galloyl esters	FBSFWRHWHYMIOG-UHFFFAOYSA-N	O=C(OC)C1=CC(O)=C(O)C(O)=C1	176	163	315	369	450	179	373	165	218	355	188	347	354	356	1936	478	2177	1986	2689	3356	3053	1769	1795	2571	551	351	468	434	392	225	134	2155	1604	1547	2236	2240	710	653	3749
733	Positive	0.080	207.04541	low score: 5-(1,2-dithiolan-3-yl)pentanoic acid	[M+H]+	207.05000	C8H14O2S2	Lipoic acids and derivatives	AGBQKNBQESQNJD-UHFFFAOYSA-N	O=C(O)CCCCC1SSCC1	302	303	278	332	248	244	219	270	240	339	261	354	352	352	267	226	4012	5203	4407	3949	4304	3677	3407	3322	305	327	216	359	281	333	916	4099	4358	4166	3165	3546	213	229	5307
734	Positive	9.111	207.04611	no MS2: 5-(1,2-dithiolan-3-yl)pentanoic acid	[M+H]+	207.05000	C8H14O2S2	Lipoic acids and derivatives	AGBQKNBQESQNJD-UHFFFAOYSA-N	O=C(O)CCCCC1SSCC1	222	342	257	192	270	281	234	276	297	333	250	285	515	366	158	296	1400	1666	1846	1757	1131	1646	1411	1320	194	208	174	293	259	270	1848	2163	1553	1519	1587	1308	652	557	2104
735	Positive	7.922	207.04654	low score: 5-(1,2-dithiolan-3-yl)pentanoic acid	[M+H]+	207.05000	C8H14O2S2	Lipoic acids and derivatives	AGBQKNBQESQNJD-UHFFFAOYSA-N	O=C(O)CCCCC1SSCC1	205	258	237	214	308	377	258	258	282	298	297	257	244	280	226	253	3637	3671	3318	3631	3653	3605	3485	3326	300	206	262	289	308	317	4936	3924	3735	3658	3282	3330	499	289	3917
736	Positive	0.767	207.07570	low score: Citropen	[M+H]+	207.07001	C11H10O4	Coumarins and derivatives	NXJCRELRQHZBQA-UHFFFAOYSA-N	O=C1OC2=CC(OC)=CC(OC)=C2C=C1	15	0	7	15	10	13	7	0	15	8	20	4	16	35	58	31	115	101	118	74	107	92	94	114	0	9	20	22	10	11	1827	94	69	79	100	92	52	85	113
737	Positive	6.953	207.12405	low score: Phenylethylmalonamide	[M+H]+	207.11281	C11H14N2O2	Phenylacetamides	JFZHPFOXAAIUMB-UHFFFAOYSA-N	CCC(C(N)=O)(C(N)=O)C1=CC=CC=C1	137	151	162	203	193	103	134	141	162	110	161	165	158	195	3764	3519	391	363	288	347	430	347	368	394	102	172	186	206	190	169	506	499	390	349	234	385	3453	3660	304
738	Positive	1.285	207.13751	no MS2: Ibuprofen	[M+H]+	207.13795	C13H18O2	Phenylpropanoic acids	HEFNNWSXXWATRW-UHFFFAOYSA-N	CC(C)CC1=CC=C(C=C1)C(C)C(=O)O	354	348	387	351	363	350	420	362	396	442	386	351	400	369	31	242	1549	1928	984	1478	1780	1587	1562	1737	366	490	329	349	431	416	94	1476	1608	1838	1707	1653	131	191	1874
739	Positive	0.383	207.13780	low score: Ibuprofen	[M+H]+	207.13795	C13H18O2	Phenylpropanoic acids	HEFNNWSXXWATRW-JTQLQIEISA-N	c1([C@@H](C(O)=O)C)ccc(CC(C)C)cc1	291	452	407	322	284	413	476	469	506	304	203	238	270	406	57	156	3116	3995	3179	3600	3163	3262	3617	3361	388	244	390	383	455	467	32	3135	3743	3601	3667	3010	112	198	3230
740	Positive	12.617	207.18752	Unknown	[M+H]+	null	null	null	null	null	286	230	229	191	192	224	222	195	235	94	226	193	260	255	112	230	2801	3119	3883	3656	3239	3241	3915	4351	174	262	198	255	249	197	2018	2424	3661	3497	3271	2912	221	349	3130
741	Positive	0.541	207.95071	Unknown	[M+H]+	null	null	null	null	null	6	6	22	13	8	19	6	11	6	19	18	6	5	14	7	6	721	986	1956	1869	2246	2184	2605	2388	20	16	8	24	15	10	67	607	1346	1709	2444	2245	26	27	1127
742	Positive	1.026	207.99814	Unknown	[M+H]+	null	null	null	null	null	72	35	23	6	16	75	50	52	52	48	83	58	26	0	97	15	0	43	10	52	0	37	60	184	84	43	56	25	7	18	1889	36	6	0	152	2	0	38	6
743	Positive	1.114	208.90390	Unknown	[M+H]+	null	null	null	null	null	2537	2061	1732	2220	2138	1860	2276	1969	2274	2358	2567	2517	2227	2496	23	2856	9379	9365	9567	9660	9929	10446	9993	9373	2068	1916	2367	2262	2584	2483	40	8078	8639	9558	10080	9146	5010	4950	9927
744	Positive	0.715	208.91025	Unknown	[M+H]+	null	null	null	null	null	0	0	11	5	10	5	0	0	5	5	10	9	9	10	208	1465	111	107	91	105	76	66	64	94	6	0	0	5	5	5	120	134	92	78	97	95	1137	1069	67
745	Positive	0.427	208.91298	Unknown	[M+H]+	null	null	null	null	null	6	11	0	11	8	0	15	7	6	2	6	0	0	0	241	113	329	414	166	176	257	256	375	349	6	0	7	6	19	9	81	383	212	416	236	264	1291	2133	526
746	Positive	0.579	208.91304	Unknown	[M+H]+	null	null	null	null	null	6	11	0	5	10	8	15	6	0	14	6	7	14	8	215	450	329	203	220	234	198	218	222	202	6	21	0	0	6	8	153	306	230	167	233	216	1660	1880	323
747	Positive	0.438	208.93028	Unknown	[M+H]+	null	null	null	null	null	0	18	7	13	9	15	6	7	13	10	6	8	8	11	32	52	1362	1842	2034	1781	1656	1921	2303	2358	23	19	7	12	0	8	430	1532	2577	2586	1831	1385	117	256	2222
748	Positive	0.763	208.95949	Unknown	[M+H]+	null	null	null	null	null	6	5	6	5	0	0	0	7	5	0	14	0	14	0	68	30	1690	1884	1822	1695	1695	1718	1712	1898	5	5	6	7	9	0	169	1585	1811	1846	1844	1742	52	70	1847
749	Positive	0.983	209.05437	no MS2: Unknown (carbon number 10); PlaSMA ID-721	[M+H-2H2O]+	209.05070	C10H8O5	Unknown	null	null	49	28	41	34	66	50	39	32	9	34	42	36	28	42	1422	12	27	55	155	4	50	104	42	0	16	16	33	20	43	16	178	123	13	24	13	22	38	20	111
750	Positive	1.002	209.07021	no MS2: Lipoic acid, reduced	[M+H-2H2O]+	209.06645	C8H16O2S2	Medium-chain fatty acids	IZFHEQBZOYJLPK-UHFFFAOYSA-N	C(CCC(=O)O)CC(CCS)S	39	21	39	34	64	52	62	37	52	34	36	50	38	48	230	25	22	34	40	15	87	20	52	5	36	47	24	32	45	19	1514	97	29	32	13	35	96	28	69
751	Positive	1.301	209.14803	no MS2: NCGC00380942-01_C13H20O2_1H-Indene-3-carboxylic acid, 3a,4,5,6,7,7a-hexahydro-3a,7,7-trimethyl-	[M+H]+	209.15361	C13H20O2	Carboxylic acids	ACQRUPZAAPLQQP-UHFFFAOYSA-N	CC1(C)CCCC\2(C)C1C\C=C2C(O)=O	242	283	274	208	211	222	221	257	252	239	208	209	177	199	534	282	201	152	230	230	234	151	96	137	293	260	211	147	155	207	82	116	183	202	113	169	58	67	193
752	Positive	13.802	209.20506	Unknown	[M+H]+	null	null	null	null	null	71	82	49	128	14	110	87	73	60	46	59	40	71	88	71	70	506	450	782	973	729	592	998	1072	55	56	59	52	74	57	120	309	848	834	593	600	18	88	464
753	Positive	7.090	209.21466	Unknown	[M+H]+	null	null	null	null	null	429	441	481	515	586	553	430	441	422	458	537	467	482	573	56	31	1260	1305	983	970	1360	1187	1269	1296	456	490	628	473	451	475	1949	1238	1319	1172	1296	1223	172	104	1277
754	Positive	0.597	209.93480	Unknown	[M+H]+	null	null	null	null	null	20	5	0	0	0	12	0	0	0	0	12	6	8	19	26	27	995	1204	1458	1304	1297	1684	1514	1513	0	6	6	7	5	11	183	1042	1346	1368	1624	1393	37	163	1085
755	Positive	0.650	209.93489	Unknown	[M+H]+	null	null	null	null	null	5	5	11	5	0	0	15	0	0	0	12	0	8	0	20	20	996	1221	1369	1318	1378	1684	1514	1513	6	7	6	7	5	11	183	998	1292	1301	1564	1393	37	57	1148
756	Positive	1.159	210.04918	low score: Aerugine	[M+2Na-H]+	210.05832	C10H11NO2S	1-hydroxy-4-unsubstituted benzenoids	CQCVSXXDUMTFCR-SSDOTTSWSA-N	C1C(N=C(S1)C2=CC=CC=C2O)CO	209	305	360	136	324	283	238	325	275	157	324	393	164	209	536	4504	273	490	529	387	504	430	466	465	243	321	177	188	141	135	175	480	637	511	381	367	3370	3810	348
757	Positive	1.099	210.06477	low score: Aerugine	[M+H]+	210.05832	C10H11NO2S	1-hydroxy-4-unsubstituted benzenoids	CQCVSXXDUMTFCR-SSDOTTSWSA-N	C1C(N=C(S1)C2=CC=CC=C2O)CO	3429	3305	3809	3756	3264	3569	3023	2839	3388	3418	3425	3535	3432	3411	301	629	6980	7226	7801	7332	8409	7852	8614	8687	3629	3529	2745	3259	3225	3158	168	9975	10472	9299	6064	6230	417	620	8886
758	Positive	1.084	210.90204	Unknown	[M+H]+	null	null	null	null	null	316	296	238	341	131	171	203	271	276	417	327	354	341	258	0	51	991	724	735	781	1324	1176	1410	1258	285	206	185	266	289	280	12	891	1549	875	1043	1183	68	48	1074
759	Positive	0.443	210.92642	Unknown	[M+H]+	null	null	null	null	null	0	10	8	10	10	0	9	6	17	0	0	0	6	14	27	68	594	1369	1166	1277	1007	1082	1224	852	9	22	0	9	0	7	231	862	1833	1193	1117	1023	114	191	1215
760	Positive	0.826	210.94608	Unknown	[M+H]+	null	null	null	null	null	10	10	10	22	12	5	12	14	5	13	12	5	10	8	0	113	1094	1199	1208	1071	1190	1014	1266	1158	10	3	8	18	15	11	50	1258	1104	1090	1078	1174	43	119	1072
761	Positive	7.707	211.13731	low score: Cyclo(proline-leucine)	[M+H]+	211.14410	C11H18N2O2	Alpha amino acids and derivatives	SZJNCZMRZAUNQT-UHFFFAOYNA-N	CC(C)CC1N=C(O)C2CCCN2C1=O	75	53	75	50	68	75	88	54	48	40	55	76	96	126	668	1225	966	1120	950	997	1100	1070	1074	1077	40	64	75	107	113	66	1407	878	1120	1229	1080	1149	554	495	1042
762	Positive	6.499	211.15794	low score: Altretamine (Hexalen)	[M+H]+	211.16656	C9H18N6	Dialkylarylamines	UUVWYPNAQBNQJQ-UHFFFAOYSA-N	N1=C(N=C(N=C1N(C)C)N(C)C)N(C)C	138	84	116	167	149	221	134	115	146	165	145	160	125	136	202	121	64	130	199	111	115	142	159	137	187	182	110	171	146	138	3127	118	139	108	161	102	149	69	113
763	Positive	12.597	211.18486	Unknown	[M+H]+	null	null	null	null	null	203	173	163	132	156	111	135	168	129	147	115	181	186	192	9	68	1101	1448	2080	2168	1316	1441	1947	2391	131	168	143	234	189	165	423	596	1220	1490	1103	1146	63	36	1337
764	Positive	0.981	212.11296	low score: Varenicline	[M+NH4]+	212.11823	C13H13N3	Benzazepines	JQSHBVHOMNKWFT-UHFFFAOYSA-N	C1C2CNCC1C3=CC4=NC=CN=C4C=C23	196	65	118	193	166	320	165	150	219	115	156	212	224	78	5323	15	95	172	49	86	82	83	124	83	133	96	17	228	251	154	1123	146	142	92	102	0	5	0	82
765	Positive	0.301	212.13239	low score: Mescaline	[M+H]+	212.12811	C11H17NO3	Phenethylamines	RHCSKNNOAZULRK-UHFFFAOYSA-N	COC1=CC(=CC(=C1OC)OC)CCN	37	8	30	27	53	15	7	39	27	54	17	20	30	15	37	37	3152	2918	2571	2341	2291	2492	2656	2775	33	40	44	24	35	28	20	3862	2483	2453	2389	2522	126	19	2568
766	Positive	0.207	212.13406	low score: Mescaline	[M+H]+	212.12811	C11H17NO3	Phenethylamines	RHCSKNNOAZULRK-UHFFFAOYSA-N	COC1=CC(=CC(=C1OC)OC)CCN	52	23	30	34	9	8	24	44	20	24	19	13	101	15	45	88	2648	2512	2660	2425	2316	2492	2656	2831	30	24	49	32	20	50	26	3091	2306	2630	2305	2591	101	181	2178
767	Positive	6.394	212.13448	low score: Mescaline	[M+H]+	212.12811	C11H17NO3	Phenethylamines	RHCSKNNOAZULRK-UHFFFAOYSA-N	COC1=CC(=CC(=C1OC)OC)CCN	10	45	45	40	10	32	60	48	22	36	20	47	36	56	163	94	2494	2890	2889	3078	2433	2396	2480	2716	32	54	29	60	34	32	3284	2822	2490	2955	2502	2838	73	78	2486
768	Positive	1.187	212.85393	Unknown	[M+H]+	null	null	null	null	null	106	16	67	129	51	104	106	58	87	115	65	134	111	35	20	1	360	254	684	417	696	835	600	247	146	61	46	81	19	73	0	148	298	225	320	577	14	42	990
769	Positive	1.127	213.07814	no MS2: Gramine	[M+K]+	213.07886	C11H14N2	3-alkylindoles	OCDGBSUVYYVKQZ-UHFFFAOYSA-N	C=1C=CC2=C(C1)NC=C2CN(C)C	19	47	34	59	2	19	38	58	40	69	82	122	49	53	68	44	516	239	533	590	100	262	126	21	77	105	32	98	90	70	32	144	225	144	322	477	81	54	1890
770	Positive	0.814	213.12280	no MS2: Prolylproline	[M+H]+	213.12337	C10H16N2O3	Dipeptides	RWCOTTLHDJWHRS-UHFFFAOYSA-N	O=C(O)C2N(C(=O)C1NCCC1)CCC2	38	36	20	38	19	20	26	49	53	35	48	24	24	39	253	98	409	475	264	501	240	263	216	299	23	29	44	45	19	51	1711	814	467	503	445	203	145	37	802
771	Positive	1.304	213.12753	no MS2: NCGC00385838-01_C15H18O2_Azuleno[4,5-b]furan-2(3H)-one, decahydro-3,6,9-tris(methylene)-, (3aS,6aR,9aR,9bS)-	[M-H2O+H]+	213.12740	C15H18O2	Guaianolides and derivatives	NETSQGRTUNRXEO-XUXIUFHCSA-N	C=C1CC[C@@H]2[C@H](OC(=O)C2=C)[C@@H]3[C@H]1CCC3=C	253	151	311	311	241	174	187	258	270	172	186	178	266	206	32	409	1525	2083	1212	1800	1262	1486	1198	1508	146	177	150	187	237	229	937	1826	1689	1460	1812	1499	432	303	1802
772	Positive	0.425	213.12856	Prolylproline; PlaSMA ID-782	[M+H]+	213.12489	C10H16N2O3	Dipeptides	RWCOTTLHDJWHRS-UHFFFAOYNA-N	O=C(O)C2N(C(=O)C1NCCC1)CCC2	110	173	107	143	147	138	204	207	124	115	137	114	164	131	40	56	5730	7411	5186	6187	6576	6988	7377	7093	139	158	172	141	130	152	890	5984	7487	7566	8358	6471	125	108	7160
773	Positive	1.212	213.13608	no MS2: Prolylproline; PlaSMA ID-782	[M+H]+	213.12489	C10H16N2O3	Dipeptides	RWCOTTLHDJWHRS-UHFFFAOYNA-N	O=C(O)C2N(C(=O)C1NCCC1)CCC2	275	258	411	413	305	410	567	341	284	307	327	364	279	253	35	107	1188	1304	719	1720	1139	1084	1400	1121	363	259	290	314	212	254	698	1263	2115	1488	1354	989	106	99	1299
774	Positive	0.915	213.15587	low score: 5-(hydroxymethyl)-3-(1-hydroxy-5-methylhexyl)oxolan-2-one	[M-H2O+H]+	213.14851	C12H22O4	Fatty alcohols	DRHZNTAKNLCGTI-UHFFFAOYSA-N	O=C1OC(CO)CC1C(O)CCCC(C)C	52	69	89	51	85	69	79	92	45	104	108	97	119	121	1088	42	234	129	59	180	283	158	179	113	42	62	55	89	127	93	152	160	280	210	277	221	112	98	293
775	Positive	13.793	213.19907	Unknown	[M+H]+	null	null	null	null	null	146	157	168	123	194	73	203	90	130	157	200	68	157	132	0	52	690	884	1818	2016	1187	1065	1845	2159	90	138	170	89	156	90	746	799	1359	1486	953	962	37	207	1119
776	Positive	0.519	213.88730	Unknown	[M+H]+	null	null	null	null	null	6	9	29	9	0	6	6	7	0	10	0	6	15	5	10	101	144	190	187	68	192	232	180	233	3	0	7	6	0	0	45	143	103	69	203	175	805	1830	175
777	Positive	0.711	213.90308	Unknown	[M+H]+	null	null	null	null	null	0	5	0	5	5	5	0	5	0	0	5	6	7	14	22	41	1260	1225	1018	1268	1078	1388	955	824	5	5	0	5	0	0	150	1133	1191	1170	1117	1156	29	48	1279
778	Positive	0.628	213.90691	Unknown	[M+H]+	null	null	null	null	null	0	6	0	3	5	5	0	0	0	0	6	0	7	14	22	48	1262	1269	1099	1266	1116	1449	1157	979	5	0	6	9	6	0	191	990	1257	1236	1119	1094	39	110	1328
779	Positive	1.161	214.02106	no MS2: Pesticide1_Omethoate_C5H12NO4PS_	[M+H]+	214.02974	C5H12NO4PS	Secondary carboxylic acid amides	PZXOQEXFMJCDPG-UHFFFAOYSA-N	CNC(=O)CSP(=O)(OC)OC	234	299	385	557	462	488	223	262	208	147	187	139	505	815	20	146	900	618	1482	1033	964	1079	1534	1420	656	561	375	269	286	418	55	1692	1271	797	1257	1239	26	35	389
780	Positive	1.187	214.85107	Unknown	[M+H]+	null	null	null	null	null	114	39	116	104	62	34	20	125	138	63	146	140	66	58	0	24	533	576	555	977	650	698	382	484	132	53	10	68	32	51	0	492	479	383	543	358	14	26	944
781	Positive	0.405	214.91150	Unknown	[M+H]+	null	null	null	null	null	0	12	0	0	0	0	0	7	0	0	0	7	7	10	300	8332	92	167	258	126	156	286	241	146	0	0	0	6	7	0	114	207	76	214	69	86	7438	7223	240
782	Positive	0.731	214.91631	Unknown	[M+H]+	null	null	null	null	null	6	6	8	9	8	5	0	10	7	13	0	5	17	6	2647	3098	231	296	295	277	215	194	275	282	9	5	18	22	5	5	268	238	259	207	251	246	1354	1316	215
783	Positive	0.427	214.93185	Unknown	[M+H]+	null	null	null	null	null	13	0	0	19	10	8	7	0	10	6	0	8	7	0	44	197	4318	2861	3535	3298	3023	3404	3021	3840	0	0	14	0	0	0	62	5700	3112	2523	4791	3893	583	435	3126
784	Positive	1.119	215.03178	no MS2: 6-Hydroxy-7-methoxycoumarin	[M+Na]+	215.03200	C10H8O4	Hydroxycoumarins	SYTYLPHCLSSCOJ-UHFFFAOYSA-N	O=C1OC=2C=C(OC)C(O)=CC2C=C1	28	127	43	51	61	86	42	19	47	70	41	25	56	76	95	10	3	28	4	56	39	32	21	29	201	92	95	109	95	46	1957	57	107	54	86	26	6	9	15
785	Positive	13.601	215.13927	no MS2: DETHIOBIOTIN	[M+H]+	215.13902	C10H18N2O3	Medium-chain fatty acids	AUTOLBMXDDTRRT-JGVFFNPUSA-N	C[C@H]1[C@H](NC(=O)N1)CCCCCC(=O)O	359	340	433	369	419	414	355	330	352	398	449	403	313	401	326	401	5018	4780	4466	5390	4968	4120	4870	4540	337	392	339	463	447	411	8552	7024	5048	4895	4513	5096	407	230	5410
786	Positive	1.146	215.13933	no MS2: NCGC00180357-02_C15H20O2_2(4aH)-Naphthalenone, 5,6,7,8-tetrahydro-6-hydroxy-4a,5-dimethyl-3-(1-methylethenyl)-, (4aR,5R,6R)-	[M-H2O+H]+	215.14304	C15H20O2	Eremophilane, 8,9-secoeremophilane and furoeremophilane sesquiterpenoids	MMDLQPKGJNEWIM-PSOPSSQASA-N	C[C@H]1[C@H](O)CC\C2=C\C(=O)\C(=C/[C@]12C)C(C)=C	1080	891	1117	1026	1783	1918	1128	716	1001	1136	1098	1148	1497	1411	229	268	11425	10987	11244	11597	13401	13019	10716	9058	2303	2239	1948	2048	1175	1260	1172	10386	11323	10580	9325	8196	253	226	11438
787	Positive	1.069	215.13939	no MS2: DETHIOBIOTIN	[M+H]+	215.13902	C10H18N2O3	Medium-chain fatty acids	AUTOLBMXDDTRRT-JGVFFNPUSA-N	C[C@H]1[C@H](NC(=O)N1)CCCCCC(=O)O	845	883	970	950	981	1127	1102	716	1046	1170	840	1016	1182	1293	228	99	11504	11259	11212	11296	13401	13334	10674	9457	2218	1349	1189	1508	1145	1348	858	10452	11328	10580	9208	8933	113	226	11330
788	Positive	0.838	215.13983	no MS2: DETHIOBIOTIN	[M+H]+	215.13902	C10H18N2O3	Medium-chain fatty acids	AUTOLBMXDDTRRT-JGVFFNPUSA-N	C[C@H]1[C@H](NC(=O)N1)CCCCCC(=O)O	42	74	58	37	78	72	61	76	41	68	63	65	73	61	112	122	578	748	416	359	394	514	494	495	36	33	94	63	88	61	6395	1178	738	654	453	816	214	191	826
789	Positive	0.365	215.14024	low score: Unknown (carbon number 10); PlaSMA ID-798	[M+H]+	215.14011	C10H18N2O3	Unknown	null	null	278	340	408	437	390	345	370	348	350	380	352	418	320	350	74	336	4502	4749	4225	4772	4285	4628	4637	4588	352	344	457	324	349	448	896	3863	4896	4284	5087	4986	250	213	4291
790	Positive	14.426	215.14108	low score: DETHIOBIOTIN	[M+H]+	215.13902	C10H18N2O3	Medium-chain fatty acids	AUTOLBMXDDTRRT-JGVFFNPUSA-N	C[C@@H]1NC(=O)N[C@@H]1CCCCCC(O)=O	457	417	512	525	544	475	467	370	478	404	447	425	514	472	255	332	6312	5014	5714	5929	4388	4244	4358	4607	391	193	449	382	371	389	8205	9758	4561	5146	4457	4623	314	287	5908
791	Positive	6.312	215.14111	no MS2: NCGC00180357-02_C15H20O2_2(4aH)-Naphthalenone, 5,6,7,8-tetrahydro-6-hydroxy-4a,5-dimethyl-3-(1-methylethenyl)-, (4aR,5R,6R)-	[M-H2O+H]+	215.14304	C15H20O2	Eremophilane, 8,9-secoeremophilane and furoeremophilane sesquiterpenoids	MMDLQPKGJNEWIM-PSOPSSQASA-N	C[C@H]1[C@H](O)CC\C2=C\C(=O)\C(=C/[C@]12C)C(C)=C	296	343	333	325	275	236	321	269	248	292	256	289	304	304	100	119	1539	1366	964	858	794	767	584	629	384	283	346	346	292	287	1988	1334	1080	986	778	756	156	150	1158
792	Positive	12.112	215.19348	Unknown	[M+H]+	null	null	null	null	null	102	66	88	87	78	157	106	76	68	75	85	75	41	42	0	107	221	185	444	493	388	306	381	429	95	103	40	74	61	87	86	295	371	468	194	206	66	47	313
793	Positive	0.402	216.03152	no MS2: 2-Aminosulfonyl-benzoic acid methyl ester	[M+H]+	216.03250	C8H9NO4S	Benzoic acid esters	VSOOBQALJVLTBH-UHFFFAOYSA-N	COC(C1=C(S(=O)(N)=O)C=CC=C1)=O	6	0	20	0	21	8	13	7	2	0	16	0	8	13	19	12	253	209	184	701	454	730	1207	861	26	16	3	9	17	22	31	137	459	600	401	8	125	71	441
794	Positive	1.076	216.14709	no MS2: Ethyl 3-(N-butylacetamido)propionate	[M+H]+	216.15942	C11H21NO3	Tertiary carboxylic acid amides	VZRKEAFHFMSHCD-UHFFFAOYSA-N	CCCCN(CCC(=O)OCC)C(C)=O	150	120	104	78	142	173	101	127	41	142	75	135	162	99	64	69	698	896	735	975	1085	1164	784	602	114	187	113	222	145	146	236	561	881	903	888	583	164	118	1092
795	Positive	0.405	216.91006	Unknown	[M+H]+	null	null	null	null	null	6	11	0	0	0	0	0	0	13	6	6	0	0	7	84	2173	148	164	201	197	126	282	192	215	13	10	0	13	8	0	56	217	288	275	163	199	1622	2473	333
796	Positive	0.846	216.92294	Unknown	[M+H]+	null	null	null	null	null	22	22	27	22	28	24	38	19	24	22	25	13	35	32	8749	1211	165	156	114	14	67	177	140	115	32	24	22	29	12	10	2028	103	130	192	47	125	3465	756	69
797	Positive	0.427	216.93008	Unknown	[M+H]+	null	null	null	null	null	0	17	8	4	0	13	9	23	6	0	13	13	5	11	32	140	1017	1091	1126	1250	1192	1378	784	884	8	2	43	6	7	0	37	665	1327	1204	1288	1210	39	98	833
798	Positive	1.047	216.93671	Unknown	[M+H]+	null	null	null	null	null	9287	10547	10206	9952	9772	9832	10087	7787	11239	10816	11482	10999	11070	11286	19	3244	78672	79919	79610	80044	79279	79505	84070	78158	9976	9365	12905	9779	10102	10435	34	70720	81515	78109	79657	79989	6437	7205	84731
799	Positive	0.862	216.93806	Unknown	[M+H]+	null	null	null	null	null	21	32	23	14	20	3	25	16	10	115	25	26	16	19	602	36	103	51	647	710	1322	73	82	32	19	18	15	11	48	10	38314	1361	832	136	1319	2144	350	318	139
800	Positive	1.109	217.06712	low score: METHYL GALACTOSIDE	[M+Na]+	217.06825	C7H14O6	O-glycosyl compounds	HOVAGTYPODGVJG-UHFFFAOYSA-N	COC1OC(CO)C(O)C(O)C1O	133	171	134	184	223	206	200	177	166	119	171	278	321	390	253	13761	584	1726	1804	2178	1069	999	1122	990	153	170	305	333	402	327	153	1284	1633	1258	1056	930	8936	9768	671
801	Positive	1.055	217.08290	low score: Zingerone	[M+Na]+	217.08000	C11H14O3	Methoxyphenols	OJYLAHXKWMRDGS-UHFFFAOYSA-N	O=C(C)CCC1=CC=C(O)C(OC)=C1	19644	19093	20899	19833	22483	23456	20890	21267	17408	18252	25996	25142	14573	15717	2672	1953	34745	35310	43666	44842	25722	25245	32827	33753	19243	18804	14940	15806	15682	15705	34651	38869	30284	30940	36574	32920	1385	1082	21747
802	Positive	1.141	217.08308	low score: 4-(sec-butoxy)benzoic acid	[M+Na]+	217.08000	C11H14O3	Benzoic acids	LCMFDJQAHNDLEI-UHFFFAOYSA-N	O=C(O)C1=CC=C(OC(C)CC)C=C1	17692	17823	19075	18969	20006	21257	18758	19921	15392	17142	22788	23538	12063	15602	56	2392	34580	35432	44961	45467	25298	24803	33801	33613	17738	17498	14960	15827	15628	15764	470	35193	30912	30341	36156	32622	1390	1145	21447
803	Positive	9.201	217.11838	low score: 5-isopropenyl-2-methyl-2-cyclohexen-1-yl acetate	[M+Na]+	217.12000	C12H18O2	Menthane monoterpenoids	YTHRBOFHFYZBRJ-VXGBXAGGSA-N	O=C(OC1C(=CCC(C(=C)C)C1)C)C	355	598	393	589	622	674	472	646	579	832	706	674	854	716	585	540	3106	3540	2439	2381	2777	3202	2685	2582	595	620	937	856	687	798	2654	2454	2424	3035	2412	2850	578	708	2378
804	Positive	1.111	217.11902	no MS2: 5-isopropenyl-2-methyl-2-cyclohexen-1-yl acetate	[M+Na]+	217.12000	C12H18O2	Menthane monoterpenoids	YTHRBOFHFYZBRJ-VXGBXAGGSA-N	O=C(OC1C(=CCC(C(=C)C)C1)C)C	1460	1597	1443	1530	2250	2081	1755	1714	1411	1546	1503	1733	1421	1387	606	152	7063	7767	7880	7918	9123	9369	7495	8568	1770	1666	1354	1529	1192	1431	996	7298	9525	7815	7401	8487	455	442	11471
805	Positive	5.957	217.11993	low score: 5-isopropenyl-2-methyl-2-cyclohexen-1-yl acetate	[M+Na]+	217.12000	C12H18O2	Menthane monoterpenoids	YTHRBOFHFYZBRJ-VXGBXAGGSA-N	O=C(OC1C(=CCC(C(=C)C)C1)C)C	680	789	675	752	801	536	728	604	713	661	546	518	1177	1243	128	224	4645	4360	3424	3251	3176	3162	2675	2888	707	748	1006	1196	1144	1173	6056	4666	3888	3684	2991	2763	134	225	4461
806	Positive	1.210	217.12013	no MS2: 5-isopropenyl-2-methyl-2-cyclohexen-1-yl acetate	[M+Na]+	217.12000	C12H18O2	Menthane monoterpenoids	YTHRBOFHFYZBRJ-VXGBXAGGSA-N	O=C(OC1C(=CCC(C(=C)C)C1)C)C	1455	1748	1491	1524	2353	2314	1893	1772	1391	1540	1555	1693	1460	1416	536	132	7296	7869	7818	7832	9034	9513	7483	8754	1910	1774	1352	1535	1112	1418	3430	7169	9490	7764	7340	8472	324	241	11358
807	Positive	0.388	217.12016	low score: 5-isopropenyl-2-methyl-2-cyclohexen-1-yl acetate	[M+Na]+	217.12000	C12H18O2	Menthane monoterpenoids	YTHRBOFHFYZBRJ-VXGBXAGGSA-N	O=C(OC1C(=CCC(C(=C)C)C1)C)C	649	590	645	626	713	629	645	541	574	576	539	636	852	708	139	257	2939	3303	3389	3190	3663	3499	3170	3946	722	673	661	733	783	616	1111	2644	3743	2751	4215	4095	166	110	3198
808	Positive	1.444	217.12257	no MS2: 5-isopropenyl-2-methyl-2-cyclohexen-1-yl acetate	[M+Na]+	217.12000	C12H18O2	Menthane monoterpenoids	YTHRBOFHFYZBRJ-VXGBXAGGSA-N	O=C(OC1C(=CCC(C(=C)C)C1)C)C	1167	1068	1072	1125	1073	1022	1167	1098	1121	1091	1120	1035	1079	1079	79	399	3739	3831	3449	3702	4173	4091	3630	4024	941	1044	1131	990	1225	1112	1342	3637	4445	3891	4196	4093	183	148	4202
809	Positive	0.434	217.85867	Unknown	[M+H]+	null	null	null	null	null	0	0	0	0	8	0	0	0	0	12	0	7	0	0	34	566	71	99	56	18	149	30	84	99	0	0	0	0	0	0	43	115	74	16	86	121	1605	1325	33
810	Positive	1.046	218.08566	no MS2: Captopril; PlaSMA ID-810	[M+H]+	218.08453	C9H15NO3S	Amino acids	FAKRSMQSSFJEIM-UHFFFAOYNA-N	CC(CS)C(=O)N1CCCC1C(O)=O	1669	1620	1557	1860	1492	1548	1738	1731	1435	1422	2171	2093	1343	1402	340	282	3038	2664	3002	3241	1162	1123	2451	2401	1598	1458	1277	1334	1309	1318	2783	2546	2433	2267	2843	2418	130	82	1831
811	Positive	1.126	218.08916	no MS2: Captopril; PlaSMA ID-810	[M+H]+	218.08453	C9H15NO3S	Amino acids	FAKRSMQSSFJEIM-UHFFFAOYNA-N	CC(CS)C(=O)N1CCCC1C(O)=O	1641	1623	1558	1826	1712	1350	1740	1684	1416	1414	2140	2096	1367	1416	52	83	3112	2150	2420	3340	1884	1523	1422	1993	1531	1458	1362	1343	1358	1332	106	1965	2286	1784	2918	2473	53	32	1911
812	Positive	1.506	218.13803	Propionylcarnitine	[M+H]+	218.13869	C10H19NO4	Acyl carnitines	UFAHZIUFPNSHSL-UHFFFAOYSA-N	O=C([O-])CC(OC(=O)CC)C[N+](C)(C)C	187	159	162	156	118	200	198	119	94	151	155	156	73	78	8739	313	99	166	117	137	201	176	149	208	155	170	94	53	79	91	26	81	177	72	134	144	85	86	171
813	Positive	1.162	218.13809	Propionylcarnitine	[M+H]+	218.13869	C10H19NO4	Acyl carnitines	UFAHZIUFPNSHSL-UHFFFAOYSA-N	O=C([O-])CC(OC(=O)CC)C[N+](C)(C)C	139	171	127	247	203	218	145	140	116	124	190	183	303	355	34408	10678	211	363	422	378	548	762	692	346	232	305	524	314	229	265	1370	685	452	407	328	377	821	685	496
814	Positive	1.179	218.15465	low score: Ethoxyquin	[M+H]+	218.15395	C14H19NO	Hydroquinolones	DECIPOUIJURFOJ-UHFFFAOYSA-N	CCOC1=CC2=C(C=C1)NC(C=C2C)(C)C	6838	7220	11982	13154	10800	11131	7313	7447	5577	5315	7309	7389	7528	8203	1867	1241	2868	3243	7141	7487	4368	5110	7433	7471	15595	15974	13675	7793	7834	7881	45411	12814	9097	8996	5324	5274	229	92	3203
815	Positive	6.651	218.21123	Unknown	[M+H]+	null	null	null	null	null	84	86	95	93	62	89	55	53	49	65	75	37	76	69	1958	409	215	269	156	176	115	208	192	222	95	45	63	52	47	48	164	215	242	152	250	170	487	567	149
816	Positive	6.639	218.22766	Unknown	[M+H]+	null	null	null	null	null	1	33	40	31	21	15	27	25	19	18	26	30	33	17	106	44	124	85	40	80	51	68	60	93	11	4	36	9	25	22	1184	55	106	54	79	73	47	36	49
817	Positive	0.444	218.86559	Unknown	[M+H]+	null	null	null	null	null	0	0	0	6	0	8	6	0	0	0	0	6	6	0	43	3821	160	58	0	110	105	144	191	138	6	0	0	0	0	0	13	67	105	187	80	104	5076	3031	48
818	Positive	0.846	218.92018	Unknown	[M+H]+	null	null	null	null	null	4	0	13	5	4	3	21	1	15	10	11	4	10	5	2699	428	37	48	28	55	37	22	43	29	5	6	4	12	25	5	961	25	44	54	50	40	1089	266	37
819	Positive	1.045	218.93408	Unknown	[M+H]+	null	null	null	null	null	3711	3694	3695	3474	3397	3187	3514	3272	3851	4004	4553	4392	3652	3719	33	1069	25844	26485	25105	27276	26468	26062	27840	28725	3494	3210	4083	3302	3753	3452	52	23098	27187	25405	26701	26523	2259	1858	29707
820	Positive	0.862	218.93546	Unknown	[M+H]+	null	null	null	null	null	9	14	22	8	10	10	17	10	28	13	34	35	8	1	190	63	188	83	69	331	488	112	624	318	10	11	7	6	13	5	12923	426	294	118	73	621	121	117	74
821	Positive	1.132	219.02635	no MS2: NCGC00380969-01_C11H7ClN2O_3-(4-Chloro-1,3-oxazol-5-yl)-1H-indole	[M+H]+	219.03197	C11H7ClN2O	Indoles	BKYJGKRXUHPPLR-UHFFFAOYSA-N	[Cl]C1=C(OC=N1)C2=C[NH]C3=C2C=CC=C3	39	33	34	45	41	8	21	35	29	33	28	36	70	94	259	5459	1314	1039	769	724	642	1717	965	1588	73	65	169	73	39	56	4898	713	771	631	737	1124	9227	9553	664
822	Positive	0.878	219.04140	low score: THEOBROMINE	[M+K]+	219.02788	C7H8N4O2	Xanthines	YAPQBXQYLJRXSA-UHFFFAOYSA-N	O=C1N=C(O)C2=C(N=CN2C)N1C	60	76	120	54	143	79	138	57	190	98	196	75	85	64	4576	300	1160	316	225	182	315	572	690	653	157	168	61	113	51	67	12573	605	341	394	377	936	345	250	1033
823	Positive	1.110	219.04243	low score: 9H-xanthen-9-one	[M+Na]+	219.03999	C13H8O2	Xanthones	JNELGWHKGNBSMD-UHFFFAOYSA-N	O=C1C=2C=CC=CC2OC=3C=CC=CC31	1747	1690	1805	1840	2050	2317	2008	1974	2091	2010	2464	2328	1763	1746	1216	523	17174	17580	18499	19562	16333	17474	15689	16098	3045	3194	2971	2203	1478	1556	3915	16246	13003	13165	18197	17651	1013	971	23925
824	Positive	7.969	219.06348	low score: Hydroxytyrosol Acetate	[M+Na]+	219.06000	C10H12O4	Tyrosols and derivatives	FGJGLFPNIZXRLV-UHFFFAOYSA-N	O=C(OCCC1=CC=C(O)C(O)=C1)C	12	15	16	29	2	22	14	20	0	6	20	0	18	21	119	121	3974	4331	4229	4268	4537	4530	4927	4667	6	18	22	15	3	24	5491	3880	4293	4429	4522	4488	99	184	4482
825	Positive	1.045	219.09776	no MS2: NCGC00180715-02!(2R)-2-[(1E,3E)-penta-1,3-dienyl]-2,3-dihydro-1-benzofuran-5,7-diol	[M+Na]+	219.10158	C13H14O3	Coumarans	WTFIFQXTQCYJKU-JWVODRKRSA-N	C\C=C\C=C\[C@H]1CC2=C(O1)C(O)=CC(O)=C2	3000	2900	3683	3658	3587	3784	3485	3332	4292	4140	4839	4751	3689	3761	1160	361	10078	11192	9860	10260	11588	10662	6968	7156	3140	3004	4944	3309	3232	3112	247	9947	11543	11615	9648	8922	340	208	9084
826	Positive	0.838	219.09801	no MS2: NCGC00385365-01_C11H16O3_2(4H)-Benzofuranone, 5,6,7,7a-tetrahydro-6-hydroxy-4,4,7a-trimethyl-, (6S,7aR)-	[M+Na]+	219.09917	C11H16O3	Benzofurans	XEVQXKKKAVVSMW-WRWORJQWSA-N	CC\1(C)C[C@H](O)C[C@@]2(C)OC(=O)/C=C12	14	11	21	36	21	16	12	25	6	23	24	23	16	15	386	24	592	237	79	126	113	210	187	236	23	24	19	16	20	11	11028	288	246	92	222	254	70	40	211
827	Positive	0.915	219.17303	low score: Alpha Cyperone	[M+H]+	219.17000	C15H22O	Eudesmane, isoeudesmane or cycloeudesmane sesquiterpenoids	KUFXJZXMWHNCEH-DOMZBBRYSA-N	O=C1C(=C2CC(C(=C)C)CCC2(C)CC1)C	24	154	131	135	222	58	59	69	54	48	68	155	62	28	1984	174	8	101	72	41	48	24	58	67	125	154	24	69	59	55	333	78	102	79	97	27	83	486	73
828	Positive	7.160	219.17438	alpha-Cyperone	[M+H]+	219.17435	C15H22O	Eudesmane, isoeudesmane or cycloeudesmane sesquiterpenoids	KUFXJZXMWHNCEH-UHFFFAOYSA-N	CC1=C2CC(CCC2(CCC1=O)C)C(=C)C	54	49	26	58	46	42	40	86	34	41	68	49	87	46	13231	8326	562	521	673	708	579	1008	714	914	58	80	27	39	56	57	661	631	968	627	566	915	8266	8770	648
829	Positive	7.139	219.19061	low score: Tributylphosphine oxide	[M+H]+	219.18723	C12H27OP	Organophosphine oxides	MNZAKDODWSQONA-UHFFFAOYSA-N	CCCCP(=O)(CCCC)CCCC	323	298	309	314	289	344	382	338	275	280	372	424	409	374	1150	798	9043	9610	11437	12758	12505	13343	13011	12927	372	268	356	310	329	380	12827	8514	13068	12827	12414	13450	826	1030	11560
830	Positive	8.782	219.19089	low score: Tributylphosphine oxide	[M+H]+	219.18723	C12H27OP	Organophosphine oxides	MNZAKDODWSQONA-UHFFFAOYSA-N	CCCCP(=O)(CCCC)CCCC	568	336	360	513	405	362	260	414	666	493	725	453	736	588	223	294	3110	2989	3629	3674	3518	3546	3732	3960	581	371	423	614	308	665	3633	2900	3270	3211	3565	3872	248	285	3282
831	Positive	7.567	219.19315	low score: Tributylphosphine oxide	[M+H]+	219.18723	C12H27OP	Organophosphine oxides	MNZAKDODWSQONA-UHFFFAOYSA-N	CCCCP(=O)(CCCC)CCCC	7153	6737	6778	7112	7118	6790	6944	6772	7150	7143	7035	6769	6221	6305	244	250	1355	1444	1701	1276	1735	1814	1633	1512	7722	7792	5285	5774	6328	6431	1488	1180	1522	1447	1366	1521	180	208	1339
832	Positive	12.135	219.22601	Unknown	[M+H]+	null	null	null	null	null	42	81	67	74	68	66	68	86	78	93	100	100	42	27	38	32	757	777	2315	2537	1322	1498	2439	2551	69	81	29	99	40	54	179	649	1123	934	743	747	0	10	1236
833	Positive	1.190	220.06717	no MS2: methyl 2-(2-amino-4-hydroxy-6-methylpyrimidin-5-yl)acetate	[M+Na]+	220.07001	C8H11N3O3	Pyrimidones	FMZPNXDUADVAFG-UHFFFAOYSA-N	O=C(OC)CC1=C(O)N=C(N=C1C)N	39	58	61	29	36	50	45	27	16	45	78	61	78	133	115	3116	778	624	684	708	695	604	459	826	30	65	48	111	60	58	205	671	676	645	427	490	3209	2939	263
834	Positive	0.870	220.06744	no MS2: methyl 2-(2-amino-4-hydroxy-6-methylpyrimidin-5-yl)acetate	[M+Na]+	220.07001	C8H11N3O3	Pyrimidones	FMZPNXDUADVAFG-UHFFFAOYSA-N	O=C(OC)CC1=C(O)N=C(N=C1C)N	13	19	8	21	16	10	11	24	15	4	17	12	30	18	1421	74	82	47	63	32	75	58	102	83	7	17	32	14	15	16	382	43	94	81	74	90	457	146	74
835	Positive	1.136	220.08203	no MS2: 1-isothiocyanato-7-methanesulfinylheptane; PlaSMA ID-828	[M+NH4]+	220.08340	C9H17NOS2	Glucosinolate breakdown metabolites	OGYHCBGORZWBPH-UHFFFAOYNA-N	O=S(C)CCCCCCCN=C=S	2147	1968	1955	1990	2455	2883	2282	2134	2270	2268	3202	3101	2241	2029	97	790	7262	6069	8316	8885	7913	7240	7789	7769	2595	2745	2616	1819	2083	2091	154	11916	11420	11278	8485	9041	704	729	3539
836	Positive	1.070	220.08203	no MS2: 1-(2-(1H-indol-3-yl)ethyl)thiourea	[M+NH4]+	220.09000	C11H13N3S	3-alkylindoles	HRBGONPRSGPFMT-UHFFFAOYSA-N	S=C(N)NCCC1=CNC=2C=CC=CC21	2264	2161	2201	2194	2754	3048	2421	2419	2556	2583	3627	3493	2235	2017	97	275	7328	2333	8316	9197	7768	7516	7841	7793	2795	2941	2625	2483	2133	2132	63	4436	11236	11065	3030	2048	194	276	3539
837	Positive	0.909	220.08249	no MS2: 1-isothiocyanato-7-methanesulfinylheptane	[M+Na]+	220.08243	C9H17NOS2	Sulfoxides	OGYHCBGORZWBPH-UHFFFAOYSA-N	O=S(C)CCCCCCCN=C=S	149	247	19	275	16	271	322	14	250	354	396	23	164	204	225	114	396	159	745	907	755	838	1016	554	252	253	20	174	269	323	5302	1162	843	1038	1177	959	179	204	193
838	Positive	1.244	220.13322	no MS2: 2-dimethylaminoethyl cinnamate	[M+H]+	220.13321	C13H17NO2	Cinnamic acid esters	BWJAQVSVFPHGSU-CMDGGOBGSA-N	CN(C)CCOC(=O)/C=C/c1ccccc1	303	306	464	485	432	392	387	512	404	409	522	452	301	190	118	143	402	544	722	835	551	463	308	280	489	567	1413	376	295	207	32	927	643	512	327	634	47	29	590
839	Positive	7.865	220.15199	low score: (4S,5Z,6S)-4-(2-methoxy-2-oxoethyl)-5-[2-[(E)-3-phenylprop-2-enoyl]oxyethylidene]-6-[(2S,3R,4S,5S,6R)-3,4,5-trihydroxy-6-(hydroxymethyl)oxan-2-yl]oxy-4H-pyran-3-carboxylic acid	[M+NH4]+	220.15433	C10H18O4	Oxolanes	IVOODSRSVJPWLY-UHFFFAOYSA-N	O=C(O)C(C)C1OC(CC1)CC(O)C	937	925	1012	837	957	787	903	1028	979	964	1329	1014	926	932	81	118	89	136	61	75	77	94	124	60	1120	1181	889	759	981	872	122	65	109	89	80	76	75	88	79
840	Positive	0.428	220.86530	Unknown	[M+H]+	null	null	null	null	null	0	8	0	0	10	7	6	0	6	6	6	0	6	0	20	1874	173	324	495	292	348	457	912	1032	0	0	6	6	8	6	53	372	480	473	431	336	2478	2662	388
841	Positive	0.429	220.88332	Unknown	[M+H]+	null	null	null	null	null	6	7	0	0	0	0	0	7	8	0	0	0	8	9	16	356	611	1281	3017	2751	3597	3612	3031	4126	6	0	6	3	0	0	93	2393	2708	2397	3961	3609	444	341	1824
842	Positive	0.647	220.91748	Unknown	[M+H]+	null	null	null	null	null	8	15	6	10	0	18	6	7	6	6	16	9	8	10	902	2915	98	98	62	66	50	57	52	98	0	0	12	7	21	11	45	120	133	109	36	25	3435	3264	43
843	Positive	1.039	220.92818	Unknown	[M+H]+	null	null	null	null	null	1579	1455	1549	1398	1507	1285	1562	1547	1828	1690	1974	2008	1634	1701	322	21	594	358	111	215	177	148	559	489	1441	1282	1453	1525	1716	1663	464	0	421	159	333	120	60	0	201
844	Positive	0.430	220.95238	no MS2: Dichlorvos	[M+H]+	220.95317	C4H7Cl2O4P	Dialkyl phosphates	OEBRKCOSUFCWJD-UHFFFAOYSA-N	COP(=O)(OC)OC=C(Cl)Cl	10	16	23	26	9	21	13	21	29	39	39	31	8	8	44	70	1500	1118	88	268	474	488	447	494	19	42	10	27	29	19	177	1178	173	362	348	307	126	144	962
845	Positive	1.049	221.03688	no MS2: Syringic acid	[M+Na]+	221.03999	C9H10O5	Gallic acid and derivatives	JMSVCTWVEWCHDZ-UHFFFAOYSA-N	O=C(O)C1=CC(OC)=C(O)C(OC)=C1	696	630	1071	1197	524	390	523	512	1458	1354	1225	1128	2050	1822	54	120	1856	1595	771	1659	1946	1936	1228	2184	1962	1740	1980	2319	1442	1232	71	1398	1088	979	1446	1337	345	164	792
846	Positive	1.138	221.03920	no MS2: 2-Hydroxy-3,4-Dimethoxybenzoic Acid	[M+Na]+	221.04204	C9H10O5	P-methoxybenzoic acids and derivatives	CJFQIVAOBBTJCI-UHFFFAOYSA-N	O=C(O)C1=CC=C(OC)C(OC)=C1O	714	265	1058	463	555	441	169	191	1460	654	1393	451	2075	1895	54	166	1940	1625	1574	1497	1899	1923	1593	2243	1983	1804	2035	1172	1436	494	84	1409	1127	994	1594	1477	230	132	1604
847	Positive	1.380	221.16687	no MS2: Prilocaine	[M+H]+	221.16484	C13H20N2O	Alpha amino acid amides	MVFGUOIZUNYYSO-UHFFFAOYSA-N	C1=CC=CC(=C1C)NC(C(NCCC)C)=O	288	234	273	357	302	242	296	272	329	261	295	305	361	305	432	215	1993	1903	2060	2062	2262	2425	2163	2330	261	285	212	347	266	316	1788	2004	2130	2200	2189	2282	153	264	2130
848	Positive	0.059	221.16745	no MS2: Prilocaine	[M+H]+	221.16484	C13H20N2O	Alpha amino acid amides	MVFGUOIZUNYYSO-UHFFFAOYSA-N	C1=CC=CC(=C1C)NC(C(NCCC)C)=O	246	172	230	229	242	218	228	300	217	200	280	314	262	308	247	200	5471	5988	6033	6541	6548	6491	6886	6987	261	157	219	246	246	247	1874	4567	6123	5820	6734	6946	392	297	6086
849	Positive	1.119	221.16780	no MS2: Prilocaine	[M+H]+	221.16484	C13H20N2O	Alpha amino acid amides	MVFGUOIZUNYYSO-UHFFFAOYSA-N	C1=CC=CC(=C1C)NC(C(NCCC)C)=O	136	144	206	180	218	72	153	69	140	160	69	113	162	165	203	48	449	313	189	266	184	317	567	425	104	139	185	163	134	117	1782	280	313	350	255	290	61	14	54
850	Positive	12.402	221.16840	low score: Prilocaine	[M+H]+	221.16484	C13H20N2O	Alpha amino acid amides	MVFGUOIZUNYYSO-UHFFFAOYSA-N	C1=CC=CC(=C1C)NC(C(NCCC)C)=O	204	223	225	253	207	180	241	263	264	241	204	166	252	216	204	262	1996	2074	2204	2509	2060	2245	2433	2486	252	255	220	268	216	259	1708	2018	2316	2476	2159	2278	178	314	2227
851	Positive	0.642	221.16995	no MS2: Prilocaine	[M+H]+	221.16484	C13H20N2O	Alpha amino acid amides	MVFGUOIZUNYYSO-UHFFFAOYSA-N	C1=CC=CC(=C1C)NC(C(NCCC)C)=O	235	253	271	198	245	237	284	232	267	231	286	245	197	192	92	61	2232	2422	2334	2363	2455	2542	2385	2531	237	214	251	231	243	209	1820	2541	2418	2568	2422	2462	137	69	2521
852	Positive	1.149	221.20113	Unknown	[M+H]+	null	null	null	null	null	194	268	219	310	43	47	82	58	160	104	41	114	563	666	55	23	721	643	321	810	798	126	704	893	486	515	342	237	154	97	167	2086	920	1145	362	424	21	0	72
853	Positive	0.909	221.20154	Unknown	[M+H]+	null	null	null	null	null	82	45	75	76	40	96	100	102	51	60	37	114	116	141	51	53	334	207	192	187	284	86	313	132	76	70	95	119	76	90	1549	179	241	131	238	130	23	27	259
854	Positive	12.664	221.24071	Unknown	[M+H]+	null	null	null	null	null	13	17	16	6	15	2	18	8	22	6	12	6	6	12	0	137	307	379	283	427	229	164	345	437	0	0	14	12	6	6	1943	208	352	238	225	136	0	19	239
855	Positive	12.519	221.24123	low score: tetradecane	[M+Na]+	221.23000	C14H30	Alkanes	BGHCVCJVXZWKCC-UHFFFAOYSA-N	CCCCCCCCCCCCCC	10	6	2	6	13	0	18	6	22	15	6	15	10	0	0	45	2842	3259	2007	2001	1355	1774	1712	1865	0	0	6	0	16	16	15	2221	1817	1775	1533	1569	46	0	1416
856	Positive	1.166	222.01207	Unknown	[M+H]+	null	null	null	null	null	127	121	29	107	62	19	102	63	64	54	164	96	68	108	80	33	370	195	179	287	315	392	343	218	125	130	76	65	68	57	2818	180	336	480	286	132	25	13	176
857	Positive	0.577	222.13303	low score: Dihydrozeatin	[M+H]+	222.13493	C10H15N5O	6-alkylaminopurines	XXFACTAYGKKOQB-UHFFFAOYSA-N	OCC(C)CCNC=1N=CNC2=NC=NC21	874	954	1002	924	841	928	932	1102	992	925	914	894	816	840	33	70	132	153	84	135	156	69	147	110	824	812	769	845	707	775	178	102	120	101	116	207	35	4	164
858	Positive	0.376	222.86369	Unknown	[M+H]+	null	null	null	null	null	17	0	0	0	23	0	7	0	0	0	7	6	0	0	8	127	534	735	598	470	540	569	590	997	0	8	0	13	0	6	12	579	839	629	504	430	1577	1699	478
859	Positive	0.427	222.88091	Unknown	[M+H]+	null	null	null	null	null	16	0	0	0	0	0	13	0	7	0	7	6	0	0	9	28	3417	3166	7189	6945	8819	8332	7957	7589	0	10	10	0	0	7	27	5457	6949	6157	9291	8252	193	182	4635
860	Positive	1.091	222.88289	Unknown	[M+H]+	null	null	null	null	null	306	338	312	318	252	295	296	367	248	305	384	418	554	534	12	135	2118	2012	3264	1779	1755	1558	1217	985	368	421	391	461	324	374	0	1362	1077	726	1823	2228	83	99	3860
861	Positive	1.038	222.89931	Unknown	[M+H]+	null	null	null	null	null	1008	1120	924	943	848	833	914	881	892	867	1263	1167	943	891	12	7	415	407	951	464	470	251	254	204	886	1017	632	627	758	640	6	313	365	207	464	544	45	132	305
862	Positive	1.040	222.92511	Unknown	[M+H]+	null	null	null	null	null	1008	1028	891	1067	691	810	1056	912	1184	1162	1246	1188	1074	1005	27	0	236	80	216	191	170	187	140	44	764	747	765	887	1261	952	0	98	150	89	165	174	0	0	330
863	Positive	0.961	223.06264	low score: 8-hydroxy-6,7-dimethoxy-2H-chromen-2-one	[M+H]+	223.06000	C11H10O5	Hydroxycoumarins	QNFBKOHHLAWWTC-UHFFFAOYSA-N	O=C1OC=2C(O)=C(OC)C(OC)=CC2C=C1	13	7	17	24	24	7	19	18	14	6	16	17	8	25	9538	1788	330	228	81	190	89	78	100	95	10	13	12	16	14	39	217	112	258	226	297	87	1095	1930	54
864	Positive	0.823	223.06430	low score: Isofraxidin	[M+H]+	223.06000	C11H10O5	7-hydroxycoumarins	HOEVRHHMDJKUMZ-UHFFFAOYSA-N	O=C1OC=2C(OC)=C(O)C(OC)=CC2C=C1	12	0	17	18	16	11	6	25	10	19	2	10	47	46	2746	7283	489	395	444	349	324	502	553	529	17	9	38	4	27	49	695	460	380	293	299	577	8014	9022	656
865	Positive	0.062	223.07837	no MS2: 2-methylanthra-9,10-quinone	[M+H]+	223.08000	C15H10O2	Anthraquinones	NJWGQARXZDRHCD-UHFFFAOYSA-N	O=C1C=2C=CC=CC2C(=O)C3=CC(=CC=C13)C	442	294	307	376	257	299	276	334	312	342	371	324	466	366	718	587	16721	19509	15864	13930	14206	12664	11769	12632	328	228	296	445	383	348	4566	15219	16822	15513	13439	12828	657	595	19952
866	Positive	7.919	223.07863	low score: Cystathionine	[M+H]+	223.07471	C7H14N2O4S	L-cysteine-S-conjugates	ILRYLPWNYFXEMH-WHFBIAKZSA-N	OC(=O)[C@@H](N)CCSC[C@@H](N)C(O)=O	254	304	341	319	264	388	337	320	297	303	328	266	417	391	500	1024	15851	16453	16742	15854	15205	14961	15051	15640	315	352	349	419	361	423	23555	15779	16446	15689	15189	13781	1009	999	16809
867	Positive	16.502	223.07883	no MS2: 2-methylanthra-9,10-quinone	[M+H]+	223.08000	C15H10O2	Anthraquinones	NJWGQARXZDRHCD-UHFFFAOYSA-N	O=C1C=2C=CC=CC2C(=O)C3=CC(=CC=C13)C	305	255	337	258	323	261	189	255	273	312	339	287	430	436	616	660	16770	44058	12651	14482	11728	10098	9577	9807	213	258	259	453	257	341	11891	14418	10184	10635	9048	9556	700	8133	17566
868	Positive	0.569	223.07893	no MS2: 2-methylanthra-9,10-quinone	[M+H]+	223.08000	C15H10O2	Anthraquinones	NJWGQARXZDRHCD-UHFFFAOYSA-N	O=C1C=2C=CC=CC2C(=O)C3=CC(=CC=C13)C	422	421	482	342	303	340	514	403	534	451	413	352	561	538	680	674	6223	5967	5318	5346	5457	5438	5152	5187	400	345	383	345	467	499	4496	5373	5576	5405	5337	5297	716	634	6132
869	Positive	6.355	223.07896	no MS2: 2-methylanthra-9,10-quinone	[M+H]+	223.08000	C15H10O2	Anthraquinones	NJWGQARXZDRHCD-UHFFFAOYSA-N	O=C1C=2C=CC=CC2C(=O)C3=CC(=CC=C13)C	449	495	430	370	415	446	449	329	388	486	430	437	562	529	460	887	5359	5676	5072	4820	4995	4902	5071	4816	433	371	366	550	405	452	5217	5625	5198	4662	5188	4693	1055	945	5133
870	Positive	18.411	223.07924	no MS2: 2-methylanthra-9,10-quinone	[M+H+Na]2+	223.08000	C15H10O2	Anthraquinones	NJWGQARXZDRHCD-UHFFFAOYSA-N	O=C1C=2C=CC=CC2C(=O)C3=CC(=CC=C13)C	212	314	256	270	302	278	251	296	225	240	274	266	326	354	472	333	15176	35755	11003	29000	11304	10297	10575	9838	191	288	268	287	319	314	28330	13177	12235	12709	9888	9803	309	9445	16102
871	Positive	9.114	223.07938	low score: Cystathionine	[M+H]+	223.07471	C7H14N2O4S	L-cysteine-S-conjugates	ILRYLPWNYFXEMH-WHFBIAKZSA-N	OC(=O)[C@@H](N)CCSC[C@@H](N)C(O)=O	284	222	271	315	475	352	332	319	434	360	322	389	430	388	563	539	6900	6752	6200	6815	5798	5487	5655	5968	616	244	472	278	448	353	8231	6103	6990	6340	6082	6640	820	1136	7311
872	Positive	14.337	223.07947	no MS2: 2-methylanthra-9,10-quinone	[M+H+Na]2+	223.08000	C15H10O2	Anthraquinones	NJWGQARXZDRHCD-UHFFFAOYSA-N	O=C1C=2C=CC=CC2C(=O)C3=CC(=CC=C13)C	324	235	361	270	229	351	284	309	356	316	259	271	350	282	609	543	14835	10052	7810	6335	6337	5504	5016	4695	321	294	359	364	286	386	4839	7503	7388	5780	5102	4946	548	7129	11638
873	Positive	17.949	223.08037	no MS2: 2-methylanthra-9,10-quinone	[M+H]+	223.08000	C15H10O2	Anthraquinones	NJWGQARXZDRHCD-UHFFFAOYSA-N	O=C1C=2C=CC=CC2C(=O)C3=CC(=CC=C13)C	276	298	329	337	326	289	332	286	258	326	300	240	415	354	271	430	14464	38233	12600	29315	12566	10313	10207	10057	267	203	305	165	307	377	15456	14119	11717	12362	10010	9510	341	4243	17590
874	Positive	0.691	223.08043	no MS2: 2-methylanthra-9,10-quinone	[M+H]+	223.08000	C15H10O2	Anthraquinones	NJWGQARXZDRHCD-UHFFFAOYSA-N	O=C1C=2C=CC=CC2C(=O)C3=CC(=CC=C13)C	538	445	529	414	382	507	521	407	569	502	480	464	556	596	748	370	5917	5625	5106	5422	5470	4632	4841	5190	447	486	408	449	560	528	5006	5464	5813	5295	5172	5186	472	439	5507
875	Positive	10.488	223.08165	no MS2: 2-methylanthra-9,10-quinone	[M+H]+	223.08000	C15H10O2	Anthraquinones	NJWGQARXZDRHCD-UHFFFAOYSA-N	O=C1C=2C=CC=CC2C(=O)C3=CC(=CC=C13)C	294	304	267	259	263	344	377	332	293	408	281	310	337	416	239	247	4939	5458	5442	4837	5276	4744	4378	4933	352	339	350	273	373	303	5817	4450	6111	4828	5184	5168	502	582	4844
876	Positive	6.334	223.16963	low score: 3-Nor-3-Oxopanasinsan-6-Ol	[M+H]+	223.16925	C14H22O2	Cyclic alcohols and derivatives	UHRWOVVMQAASAO-UHFFFAOYSA-N	O=C1CCC(O)C2(C)CCC3C(C)(C)CC132	826	730	814	792	862	881	806	870	783	833	893	798	829	800	244	297	3951	4254	4015	3677	3772	3929	3892	3735	964	838	781	892	739	755	4966	4061	3940	4207	3923	4070	230	313	3517
877	Positive	12.393	223.18300	Unknown	[M+H]+	null	null	null	null	null	267	405	296	267	270	235	264	281	276	250	281	234	217	135	31	86	369	524	552	406	642	562	585	512	239	320	204	186	205	208	260	393	524	588	561	577	89	86	256
878	Positive	1.189	224.01152	Unknown	[M+H]+	null	null	null	null	null	20	9	8	36	32	39	0	6	17	10	25	20	0	0	27	11	207	133	98	159	185	148	329	296	0	22	21	11	23	26	1187	78	161	233	137	126	0	2	72
879	Positive	9.155	224.12802	no MS2: Bufexamac	[M+H]+	224.12811	C12H17NO3	Phenylacetamides	MXJWRABVEGLYDG-UHFFFAOYSA-N	C1(C=CC(=CC=1)OCCCC)CC(=O)NO	55	69	75	43	132	117	79	128	54	93	108	68	120	66	3855	4824	179	177	277	437	313	418	379	339	129	75	165	250	115	147	114	329	355	312	346	210	3919	3457	220
880	Positive	1.398	224.12802	low score: Mepanipyrim	[M+H]+	224.11823	C14H13N3	Aniline and substituted anilines	CIFWZNRJIBNXRE-UHFFFAOYSA-N	CC#CC1=CC(C)=NC(NC2=CC=CC=C2)=N1	158	103	150	146	153	94	107	147	91	132	148	100	370	177	1690	8209	142	166	180	183	198	208	110	145	130	145	342	368	294	331	72	226	137	175	204	238	5670	4122	138
881	Positive	7.406	224.12808	no MS2: Bufexamac	[M+H]+	224.12811	C12H17NO3	Phenylacetamides	MXJWRABVEGLYDG-UHFFFAOYSA-N	C1(C=CC(=CC=1)OCCCC)CC(=O)NO	100	104	81	123	98	100	118	98	108	103	73	103	138	169	4945	4876	201	283	270	386	386	252	404	295	109	107	237	159	129	236	194	254	365	278	361	421	3827	3258	219
882	Positive	0.367	224.12895	low score: Mepanipyrim	[M+H]+	224.11823	C14H13N3	Aniline and substituted anilines	CIFWZNRJIBNXRE-UHFFFAOYSA-N	CC#CC1=CC(C)=NC(NC2=CC=CC=C2)=N1	53	71	85	38	65	95	86	86	84	107	60	88	291	106	1454	3683	361	389	344	340	244	274	333	477	98	111	173	111	298	436	94	264	75	491	332	209	3283	2424	253
883	Positive	6.773	224.14363	no MS2: Camellimidazole D	[M+H]+	224.15059	C10H17N5O	2-heteroaryl carboxamides	VTPXABIHFAGVJO-UHFFFAOYSA-N	CN1C2=C(N(CN(CN(C)C2=O)C)C)N=C1	4534	5007	4990	4779	4720	4801	5199	5068	5385	5747	5388	5349	4659	5434	113	362	4030	4409	4934	4791	5372	5355	5413	4784	5411	5311	4614	4749	5097	4858	3420	3958	4948	4597	4974	5254	286	244	4625
884	Positive	9.092	224.14401	low score: Camellimidazole D	[M+H]+	224.15059	C10H17N5O	2-heteroaryl carboxamides	VTPXABIHFAGVJO-UHFFFAOYSA-N	CN1C2=C(N(CN(CN(C)C2=O)C)C)N=C1	2927	2721	2635	3390	3370	2288	3406	3066	3238	2869	3256	3783	2746	2578	245	444	3694	3485	4390	4111	4525	3769	4580	4875	2872	3244	1711	3022	3145	2668	2689	3306	3542	3857	4416	4282	669	281	3676
885	Positive	8.621	224.14442	low score: Camellimidazole D	[M+H]+	224.15059	C10H17N5O	2-heteroaryl carboxamides	VTPXABIHFAGVJO-UHFFFAOYSA-N	CN1C2=C(N(CN(CN(C)C2=O)C)C)N=C1	3022	3348	2851	2874	3074	3175	3381	2763	3199	3120	3132	2982	3244	2758	521	534	3762	3983	4275	4657	4299	3847	4679	4597	3151	3342	3073	3051	2991	2762	2454	3701	4836	4655	4608	4172	557	349	4158
886	Positive	6.094	224.14482	no MS2: Camellimidazole D	[M+H]+	224.15059	C10H17N5O	2-heteroaryl carboxamides	VTPXABIHFAGVJO-UHFFFAOYSA-N	CN1C2=C(N(CN(CN(C)C2=O)C)C)N=C1	4667	4884	4772	5052	4702	5185	5200	5478	5131	5459	4855	4988	5348	5699	235	169	2157	2366	2807	3050	3347	3358	3355	3070	5447	5268	5106	5231	5565	5263	1797	2286	2585	2765	3495	3062	173	156	2591
887	Positive	1.400	224.14795	low score: Camellimidazole D	[M+H]+	224.15059	C10H17N5O	2-heteroaryl carboxamides	VTPXABIHFAGVJO-UHFFFAOYSA-N	CN1C2=C(N(CN(CN(C)C2=O)C)C)N=C1	7494	7638	7776	7866	7205	7884	8184	7911	8470	8224	8279	8118	6413	6946	54	221	988	2127	2092	2623	2357	2284	2234	1534	8484	7964	6634	6751	6663	7104	739	2047	2229	2537	2358	1470	100	107	2214
888	Positive	1.316	224.14816	low score: Camellimidazole D	[M+H]+	224.15059	C10H17N5O	2-heteroaryl carboxamides	VTPXABIHFAGVJO-UHFFFAOYSA-N	CN1C2=C(N(CN(CN(C)C2=O)C)C)N=C1	6896	7692	7776	7901	7285	6514	8312	7911	7751	8213	8404	8170	6499	6977	32	246	994	2064	1880	2460	2375	2243	2228	2368	8484	7964	6517	6826	6701	7216	777	2091	2133	2495	2330	2551	100	55	2165
889	Positive	0.447	224.14827	low score: Camellimidazole D	[M+H]+	224.15059	C10H17N5O	2-heteroaryl carboxamides	VTPXABIHFAGVJO-UHFFFAOYSA-N	CN1C2=C(N(CN(CN(C)C2=O)C)C)N=C1	5321	5391	5522	5353	5108	5589	5440	5247	5520	5091	5024	5091	5052	4665	47	68	2698	3542	2728	2650	2866	3034	3131	2932	5632	5368	4017	4831	4826	4962	720	2951	3116	3290	3588	2892	46	61	2800
890	Positive	9.455	224.14879	low score: Camellimidazole D	[M+H]+	224.15059	C10H17N5O	2-heteroaryl carboxamides	VTPXABIHFAGVJO-UHFFFAOYSA-N	CN1C2=C(N(CN(CN(C)C2=O)C)C)N=C1	2908	3084	2799	2622	2998	3028	3406	3051	3171	2902	3342	3378	2700	2673	115	96	2901	3160	3641	3879	4839	4021	4319	3931	3043	3144	1819	2749	2861	2897	2055	2961	4147	3562	4275	3940	169	122	3497
891	Positive	0.426	224.87914	Unknown	[M+H]+	null	null	null	null	null	8	0	0	0	6	6	6	14	7	8	6	8	0	0	23	39	2785	2719	5310	4974	5480	5398	5665	4950	0	0	13	6	0	0	59	3286	4488	3933	5984	5526	25	118	3154
892	Positive	1.103	224.87988	Unknown	[M+H]+	null	null	null	null	null	222	153	248	243	187	246	282	188	295	207	334	243	258	207	19	49	1432	789	1374	1460	1625	1656	896	1057	308	341	298	196	268	230	11	1142	623	608	1553	1246	127	104	3231
893	Positive	0.646	224.89931	Unknown	[M+H]+	null	null	null	null	null	0	0	0	0	5	6	0	5	0	5	6	0	0	10	13	25	851	952	1204	1252	1134	1155	1183	1143	9	0	18	0	0	6	433	908	695	1339	1140	1056	68	96	702
894	Positive	0.638	225.01489	low score: 4-hydroxy-7H-furo[3,2-g]chromen-7-one	[M+Na]+	225.02000	C11H6O4	5-hydroxypsoralens	GIJHDGJRTUSBJR-UHFFFAOYSA-N	O=C1OC=2C=C3OC=CC3=C(O)C2C=C1	7	12	12	6	5	17	20	6	6	0	0	6	9	5	14	33	595	617	925	897	1286	1114	1125	1008	6	10	8	14	15	0	180	480	918	697	1136	1427	18	26	821
895	Positive	1.058	225.03441	Unknown	[M+H]+	null	null	null	null	null	70	32	75	69	112	52	77	33	48	63	112	102	159	162	486	5671	1294	1038	823	825	556	1490	842	1046	73	61	153	169	142	90	108	549	569	707	654	481	11588	11936	603
896	Positive	1.061	225.04953	low score: 7-hydroxy-2,3-dihydrocyclopenta[c]chromen-4(1H)-one	[M+Na]+	225.05000	C12H10O3	Coumarins and derivatives	HLHZQJPJPNQANY-UHFFFAOYSA-N	O=C1OC=2C=C(O)C=CC2C3=C1CCC3	5438	5112	4541	4611	4915	5241	5107	4679	5408	5283	5669	5975	3427	3748	933	949	20400	20088	20272	21735	15828	17130	20556	19357	5155	5258	3984	4097	4620	4668	365	16107	17505	16990	18653	17925	1795	1436	19126
897	Positive	0.885	225.05186	no MS2: Pesticide1_Mevinphos Isomer 1*_C7H13O6P_2-Butenoic acid, 3-[(dimethoxyphosphinyl)oxy]-, methyl ester, (2E)-	[M+H]+	225.05225	C7H13O6P	Fatty acid esters	GEPDYQSQVLXLEU-AATRIKPKSA-N	CC(=CC(=O)OC)OP(=O)(OC)OC	33	343	195	43	196	289	472	32	309	506	454	474	242	59	1078	883	461	528	377	1858	1793	2131	2654	2447	35	44	57	197	327	373	6039	2267	1585	1763	2187	2759	1210	1067	1125
898	Positive	1.250	225.12424	no MS2: Tripropyl phosphate	[M+H]+	225.12502	C9H21O4P	Trialkyl phosphates	RXPQRKFMDQNODS-UHFFFAOYSA-N	CCCOP(=O)(OCCC)OCCC	241	338	306	310	266	443	234	355	233	271	231	335	490	500	260	1753	468	449	509	541	542	459	395	865	397	369	389	520	384	454	87	499	641	767	715	729	1066	968	336
899	Positive	0.374	225.15089	low score: methyl jasmonate	[M+H]+	225.14999	C13H20O3	Jasmonic acids	GEWDNTWNSAZUDX-NNOMMRTBSA-N	O=C(OC)CC1CCC(=O)C1CC=CCC	416	369	676	839	886	300	373	913	791	363	621	687	370	790	65	186	5969	5658	4878	6127	4648	5591	6210	6077	873	792	197	618	637	667	177	4759	5660	6023	6585	5790	293	81	4497
900	Positive	7.996	225.19460	Dicyclohexylurea	[M+H]+	225.19614	C13H24N2O	Ureas	ADFXKUOMJKEIND-UHFFFAOYSA-N	C1CCC(CC1)NC(=O)NC2CCCCC2	91	63	93	92	63	78	81	82	99	93	97	105	125	153	15557	9923	1532	1388	1242	1114	1261	1321	969	1482	101	110	128	131	160	123	1340	863	1297	1020	1127	1174	9223	9986	1112
901	Positive	12.593	225.20210	low score: Dicyclohexylurea	[M+H]+	225.19614	C13H24N2O	Ureas	ADFXKUOMJKEIND-UHFFFAOYSA-N	C1CCC(CC1)NC(=O)NC2CCCCC2	113	128	99	114	132	88	150	171	112	116	119	137	138	191	125	78	1291	1324	2199	2440	1474	1759	2386	2304	111	150	106	168	112	144	361	1020	2213	1794	1356	1449	151	104	1709
902	Positive	7.137	225.20976	low score: N~1~,N~4~-bis(3-aminopropyl)-1,4-butanediamine	[M+Na]+	225.21001	C10H26N4	Dialkylamines	PFNFFQXMRSDOHW-UHFFFAOYSA-N	NCCCNCCCCNCCCN	200	219	144	201	180	163	163	161	164	251	164	175	200	192	87	110	1609	1555	1720	1530	2028	1713	1917	1677	174	150	206	187	180	196	543	1655	1578	1694	1926	1942	122	54	1546
903	Positive	7.988	225.21228	low score: N~1~,N~4~-bis(3-aminopropyl)-1,4-butanediamine	[M+Na]+	225.21001	C10H26N4	Dialkylamines	PFNFFQXMRSDOHW-UHFFFAOYSA-N	NCCCNCCCCNCCCN	326	362	291	249	234	321	314	308	202	258	238	254	440	443	1303	749	26951	29599	26907	28929	29191	28858	29376	29944	311	249	507	478	395	464	39156	26308	28586	29096	30646	28334	1018	774	29830
904	Positive	8.136	225.21623	low score: N~1~,N~4~-bis(3-aminopropyl)-1,4-butanediamine	[M+Na]+	225.21001	C10H26N4	Dialkylamines	PFNFFQXMRSDOHW-UHFFFAOYSA-N	NCCCNCCCCNCCCN	6631	6227	8144	7975	7500	7299	8079	12797	9597	9901	10491	8951	6726	9560	176	175	1878	1860	2008	2080	2009	1682	1984	1994	11334	7684	9373	6920	5980	6527	1669	1899	2058	1880	1844	1917	227	125	2067
905	Positive	1.069	226.06248	no MS2: Synephrine hydrochloride	[M+ACN+H]+	226.06000	C9H14ClNO2	1-hydroxy-2-unsubstituted benzenoids	COTCEGYSNTWJQV-UHFFFAOYSA-N	Cl.OC1=CC=C(C=C1)C(O)CNC	1773	1733	1781	1588	1791	1907	1573	1546	2535	2561	2034	1952	1861	2056	211	128	5420	4746	5866	5511	5378	4998	5026	4707	2219	2057	1510	1594	2786	2750	434	6072	8144	7358	4887	4293	100	133	3507
906	Positive	1.143	226.10585	low score: O-ACETYLCARNITINE	[M+Na]+	226.10498	C9H17NO4	Acyl carnitines	RDHQFKQIGNGIED-UHFFFAOYSA-N	CC(=O)OC(CC([O-])=O)C[N+](C)(C)C	126	102	117	74	170	160	89	115	137	157	141	97	196	226	102	4831	380	453	1040	1199	659	453	670	319	108	143	170	272	327	151	57	534	560	342	674	564	7547	6592	1478
907	Positive	1.132	226.12128	low score: N-methyl-alpha-phenylbenzeneacetamide	[M+H]+	226.12263	C15H15NO	Diphenylmethanes	DIZKGJLRHOCMTP-UHFFFAOYSA-N	CNC(=O)C(C1=CC=CC=C1)C1=CC=CC=C1	5609	5105	4510	4737	5817	6741	5302	4657	4868	5084	4630	4557	4060	4273	90	567	3781	6354	9312	10109	6236	5831	6545	5273	4752	4673	2386	4439	4420	1669	166	5423	3972	3607	7070	6750	765	525	15469
908	Positive	1.050	226.12451	no MS2: N-methyl-alpha-phenylbenzeneacetamide	[M+H]+	226.12263	C15H15NO	Diphenylmethanes	DIZKGJLRHOCMTP-UHFFFAOYSA-N	CNC(=O)C(C1=CC=CC=C1)C1=CC=CC=C1	5848	5604	4983	5083	6076	6969	5511	4920	5206	5508	4953	4943	4050	4237	91	96	3747	6374	9417	10445	6345	5596	7010	5350	5015	5211	2386	4484	4416	4551	168	5731	4059	3724	7344	7151	183	199	15685
909	Positive	7.280	226.18002	Unknown	[M+H]+	null	null	null	null	null	110	54	71	52	83	64	70	64	108	83	83	90	87	156	4859	1493	120	199	251	197	202	200	155	217	64	82	62	112	180	146	248	96	227	138	128	137	1479	1373	122
910	Positive	7.315	226.19923	Unknown	[M+H]+	null	null	null	null	null	2796	3010	2820	2881	2823	2888	2921	2902	2993	2881	3029	3060	2743	3062	123	66	1372	1484	1596	1670	1768	1690	1946	1780	3800	3520	1955	2382	3099	2914	3631	1263	1691	1692	1704	1732	61	77	1431
911	Positive	7.288	226.23103	Unknown	[M+H]+	null	null	null	null	null	141	63	197	176	166	88	125	130	59	171	67	74	91	102	16	2	2140	1994	1824	1933	2124	2054	2004	2218	137	136	152	156	98	98	2286	1973	2069	2053	1997	1984	38	23	2196
912	Positive	0.296	226.23500	Unknown	[M+H]+	null	null	null	null	null	168	177	210	212	291	158	148	217	217	194	220	193	140	174	15	16	1283	1285	1463	1405	1482	1188	1467	1346	220	210	174	176	208	195	44	1377	1395	1418	1419	1392	50	0	1188
913	Positive	0.426	226.87628	Unknown	[M+H]+	null	null	null	null	null	0	14	0	0	0	0	6	7	0	14	0	7	7	0	20	27	1023	518	1582	1912	1956	1811	1630	1655	6	8	0	0	0	7	43	1326	1424	1259	1947	1771	44	95	854
914	Positive	0.352	226.95137	Unknown	[M+H]+	null	null	null	null	null	0	8	13	10	14	12	7	0	0	8	7	8	35	7	27	3565	32	64	41	155	36	142	86	93	0	0	20	6	9	7	111	20	38	42	149	120	10386	8411	29
915	Positive	1.026	226.95148	Unknown	[M+H]+	null	null	null	null	null	53	62	45	37	58	55	58	42	36	81	75	44	301	382	13	33848	4285	5016	4238	3633	3379	3632	2750	2516	72	30	180	150	254	191	74	3241	4074	3246	2173	2361	39913	44589	3305
916	Positive	0.823	226.95171	Unknown	[M+H]+	null	null	null	null	null	0	19	1	16	7	10	13	5	2	7	2	5	4	4	83346	833	174	169	101	76	130	135	114	153	0	1	5	5	0	6	7749	124	133	118	172	76	2577	469	208
917	Positive	0.838	226.96738	Unknown	[M+H]+	null	null	null	null	null	3	6	3	4	9	5	0	5	12	19	11	14	6	3	5891	78	125	145	79	73	139	90	97	45	2	27	5	8	2	0	139876	133	169	136	121	280	252	432	135
918	Positive	1.030	226.96790	Unknown	[M+H]+	null	null	null	null	null	8670	8524	8003	7970	8232	8197	7801	7578	9052	9163	9642	9220	8254	8258	12	1847	91592	88381	84411	88929	83402	80704	87783	87161	8154	8347	12082	8186	8341	7948	71	79460	89651	86592	83446	84709	2161	2697	93723
919	Positive	1.213	227.07617	no MS2: TRYPTOPHAN	[M+Na]+	227.07910	C11H12N2O2	Indolyl carboxylic acids and derivatives	QIVBCDIJIAJPQS-SECBINFHSA-N	N[C@H](CC1=CNC2=CC=CC=C12)C(O)=O	58	61	88	54	89	99	152	169	148	109	85	200	144	66	45	2769	472	558	491	545	585	541	453	543	169	79	91	77	200	100	71	584	642	726	702	636	1735	1502	420
920	Positive	1.157	227.09570	low score: Pyrenocine B putative	[M+H]+	227.09140	C11H14O5	Aryl alkyl ketones	NXDGLHJHHJJTSZ-UHFFFAOYSA-N	CC1=C(C(=CC(=O)O1)OC)C(=O)CC(C)O	2762	2818	4097	4308	3568	3465	2912	2927	3159	3210	3078	3147	2871	3075	281	450	4891	4747	4086	5513	3963	4081	5581	5647	3742	3400	3750	3107	3672	3301	96	4798	5154	4211	3209	2966	293	317	6079
921	Positive	3.520	227.09634	low score: Genipin	[M+H]+	227.09000	C11H14O5	Iridoids and derivatives	AZKVWQKMDGGDSV-BCMRRPTOSA-N	O=C(OC)C1=COC(O)C2C(=CCC12)CO	7	15	10	7	11	14	9	11	12	14	4	14	13	15	25	59	50	55	20	35	38	32	29	52	17	8	9	12	18	15	1527	38	35	35	31	19	61	35	54
922	Positive	7.799	227.14330	low score: NCGC00380138-01!	[M+NH4]+	227.13902	C11H15NO3	Oxazolidinones	UZQNZIRCZJBHKR-UHFFFAOYSA-N	CCC1C(O)C2OC(=O)N3CCC=C1C23	155	95	93	124	96	100	80	100	91	102	74	108	111	140	166	117	937	864	957	809	1034	892	929	862	101	112	110	93	114	73	1393	809	776	896	794	961	217	100	812
923	Positive	8.925	227.20432	Unknown	[M+H]+	null	null	null	null	null	101	70	177	135	140	115	51	153	94	87	63	79	52	114	2140	948	248	343	170	202	252	249	232	312	129	133	98	49	130	169	412	218	291	255	161	347	1481	1184	292
924	Positive	13.798	227.21812	Unknown	[M+H]+	null	null	null	null	null	95	68	61	58	111	109	107	89	84	109	153	129	133	104	0	0	723	710	1817	1828	1062	1304	1805	1962	53	115	110	70	100	65	837	761	1258	1240	1021	1050	48	58	1032
925	Positive	1.180	227.94438	Unknown	[M+H]+	null	null	null	null	null	0	7	13	5	6	0	0	4	12	6	13	9	18	22	5	1249	70	40	90	222	118	96	164	237	0	0	31	10	10	24	18	119	123	95	90	86	902	863	96
926	Positive	7.735	228.16426	low score: C8-homoserine lactone	[M+H]+	228.15942	C12H21NO3	N-acyl-alpha amino acids and derivatives	JKEJEOJPJVRHMQ-UHFFFAOYSA-N	CCCCCCCC(=O)NC1CCOC1=O	46	35	38	34	58	39	44	22	34	28	40	39	51	16	423	232	991	990	869	868	986	1096	1007	984	28	38	651	38	32	27	1387	927	1034	1242	927	768	164	169	897
927	Positive	7.752	228.19595	low score: Andrachcinidine	[M+H]+	228.19580	C13H25NO2	Piperidines	GFVMHSQLCIEXNG-YNEHKIRRSA-N	CCCC(CC1CCCC(N1)CC(=O)C)O	74	52	49	44	63	53	51	65	93	44	57	48	56	38	5828	1241	218	198	216	142	161	132	111	219	40	66	61	47	64	63	289	122	224	167	166	189	1083	1146	168
928	Positive	7.741	228.21198	Unknown	[M+H]+	null	null	null	null	null	595	419	363	426	379	296	416	422	380	331	415	412	404	422	569	129	1180	1243	1240	1243	1425	1246	1456	1505	600	490	323	410	366	409	2946	970	1215	1259	1408	1309	209	97	1334
929	Positive	7.511	228.21335	Unknown	[M+H]+	null	null	null	null	null	110	111	88	133	101	108	120	148	107	133	179	86	70	159	30	72	134	187	78	112	133	117	190	129	122	95	1416	156	101	137	126	150	149	115	140	93	22	26	174
930	Positive	6.954	228.21658	Unknown	[M+H]+	null	null	null	null	null	1059	1096	1998	2131	1842	1647	1665	1880	2139	1963	1649	1750	1265	1320	32	35	158	93	89	178	136	128	172	167	1497	1391	104	962	1280	1065	102	139	133	115	81	130	23	24	142
931	Positive	7.916	228.21730	Unknown	[M+H]+	null	null	null	null	null	2022	2057	2006	1960	1915	1932	2128	2293	2267	2280	2071	2133	1906	2054	56	42	196	295	262	295	269	328	217	293	2533	2311	1520	1701	2167	1686	264	159	187	315	224	269	24	65	292
932	Positive	6.686	228.24619	Unknown	[M+H]+	null	null	null	null	null	215	219	200	178	153	215	263	184	227	202	186	218	204	242	196	50	328	346	220	177	372	276	360	314	225	199	290	263	214	272	1192	295	349	354	301	210	66	84	276
933	Positive	0.425	228.87207	Unknown	[M+H]+	null	null	null	null	null	0	0	0	0	6	20	6	0	9	0	7	7	7	11	5	7	423	383	910	869	779	846	879	692	0	0	6	0	0	0	71	15	763	638	891	955	108	134	660
934	Positive	0.396	228.89168	Unknown	[M+H]+	null	null	null	null	null	0	0	0	0	0	0	0	14	6	0	0	0	0	6	71	175	709	584	506	506	560	531	780	747	8	0	6	0	0	0	141	108	750	694	723	603	1287	821	838
935	Positive	0.509	228.89551	Unknown	[M+H]+	null	null	null	null	null	0	0	0	0	6	8	0	0	6	6	6	6	7	12	51	1010	704	621	487	533	585	496	806	722	10	6	6	0	0	5	123	697	706	699	729	571	700	815	921
936	Positive	0.893	229.12730	no MS2: Pesticide3_Isoproturon_C12H18N2O_Arelon	[M+Na]+	229.13113	C12H18N2O	N-phenylureas	PUIYMUZLKQOUOZ-UHFFFAOYSA-N	CC(C)C1=CC=C(C=C1)NC(=O)N(C)C	28	45	53	193	130	18	64	19	15	29	154	41	29	40	1607	209	194	70	40	254	276	116	270	247	47	139	21	50	56	265	596	357	149	209	368	150	109	38	297
937	Positive	0.933	229.14470	no MS2: NCGC00380119-01!3-(5,6-dihydroxyheptyl)-4-methyl-2H-furan-5-one [IIN-based on: CCMSLIB00000845434]	[M+H]+	229.14343	C12H20O4	Fatty alcohols	HNNQILZBIHECCU-UHFFFAOYSA-N	CC(O)C(O)CCCCC1=C(C)C(=O)OC1	81	146	103	178	445	387	22	175	116	126	201	191	215	166	238	516	329	808	174	230	529	444	446	386	124	111	17	154	164	219	1626	584	430	272	679	869	318	253	246
938	Positive	1.162	229.15254	Unknown (carbon number 11); PlaSMA ID-898	[M+H]+	229.15520	C11H20N2O3	Unknown	null	null	421	392	370	399	493	739	599	510	330	382	736	648	630	442	8602	2340	1247	1544	830	1073	1147	1647	1118	1353	442	443	525	622	329	388	315	991	1553	1257	1346	638	475	891	691
939	Positive	1.161	229.16862	Unknown	[M+H]+	null	null	null	null	null	3172	3020	1470	1518	2999	2804	4437	4317	3027	2772	2737	2674	2814	2968	1535	323	2585	3185	2130	2507	2158	2334	2444	2259	2052	2128	2770	1775	1660	1828	4312	794	1460	1454	1956	1397	110	194	1954
940	Positive	11.762	229.23260	Unknown	[M+H]+	null	null	null	null	null	524	572	584	546	430	419	636	508	605	459	467	486	431	467	157	168	2091	2118	2782	2708	2364	2427	2997	3431	531	504	475	425	586	519	1392	1808	2232	2239	1757	1880	155	90	2949
941	Positive	0.425	229.90842	Unknown	[M+H]+	null	null	null	null	null	0	9	0	7	10	0	0	0	0	0	0	0	7	8	31	105	791	522	1279	1160	1191	1136	787	1014	7	15	0	6	11	6	195	656	1123	497	1538	1071	190	181	681
942	Positive	6.406	230.15567	Unknown	[M+H]+	null	null	null	null	null	160	224	171	172	143	182	221	177	177	225	220	120	164	206	57	66	3224	3584	3067	3122	3124	3288	2977	2875	167	228	178	151	202	170	2357	3356	3380	3397	3087	2867	53	43	3432
943	Positive	1.143	230.15579	Unknown	[M+H]+	null	null	null	null	null	142	139	75	121	47	223	136	113	147	77	122	121	138	134	1069	260	5128	4230	3354	4332	6410	6775	6752	6204	106	213	243	123	157	95	1182	3147	5329	3519	7130	5394	80	59	5383
944	Positive	5.936	230.15585	Unknown	[M+H]+	null	null	null	null	null	24	20	25	10	34	26	39	23	14	21	44	19	63	44	16	30	5664	5993	6606	6348	6653	6369	6644	5621	37	22	57	43	31	61	4027	5294	6756	6313	6608	5906	30	9	6476
945	Positive	0.425	230.15625	Unknown	[M+NH4]+	null	null	null	null	null	168	214	132	137	227	147	169	164	170	154	125	129	184	129	8	50	12863	14490	11283	15402	15775	17202	19967	20038	210	142	254	158	153	215	149	11749	15975	16590	18059	16468	143	83	14254
946	Positive	9.192	230.15678	Unknown	[M+H]+	null	null	null	null	null	130	100	159	119	115	152	117	102	54	150	133	157	83	96	77	80	3623	4061	3107	3625	4084	3955	4195	3948	180	122	193	306	117	131	2712	3436	3457	3653	3804	4049	91	33	3896
947	Positive	8.841	230.15683	Unknown	[M+H]+	null	null	null	null	null	171	292	103	50	50	135	105	147	222	214	32	139	102	317	47	122	3534	3816	3054	3257	3825	4051	3939	3832	33	157	336	206	93	165	2429	3280	3713	3648	3915	3788	81	17	3700
948	Positive	1.298	230.15732	Unknown	[M+H]+	null	null	null	null	null	171	120	190	154	163	242	207	194	158	150	162	182	192	215	30	269	12113	13950	9594	10896	16567	16560	16269	15628	202	201	239	190	156	188	153	10650	13616	13860	16638	15681	49	56	14189
949	Positive	8.668	230.15854	Unknown	[M+H]+	null	null	null	null	null	166	134	104	137	91	116	229	60	189	141	159	170	171	141	103	44	3631	3448	2769	3070	3086	3591	3939	3945	194	239	150	113	87	117	2835	3285	2794	2894	3674	3577	94	52	3637
950	Positive	7.614	230.24854	low score: N,N-Dimethyldodecylamine N-oxide	[M+H]+	230.24785	C14H31NO	Long-chain alkyl amine oxides	SYELZBGXAIXKHU-UHFFFAOYSA-N	CCCCCCCCCCCC[N+](C)(C)[O-]	47	89	102	79	113	88	96	109	99	100	103	61	31	46	10780	66	118	168	106	120	92	51	128	120	77	75	37	42	70	78	120	76	77	113	106	107	95	16	113
951	Positive	1.364	230.25037	N,N-Dimethyldodecylamine N-oxide	[M+H]+	230.24785	C14H31NO	Long-chain alkyl amine oxides	SYELZBGXAIXKHU-UHFFFAOYSA-N	CCCCCCCCCCCC[N+](C)(C)[O-]	53	33	56	57	46	33	81	47	76	71	58	66	23	22	8	5016	24	20	11	31	60	60	34	30	79	25	38	31	33	36	43	24	9	78	56	59	1348	818	33
952	Positive	7.521	230.26463	Unknown	[M+H]+	null	null	null	null	null	1100	2156	2209	2049	1941	1861	2269	1475	1456	1597	598	1029	1263	968	800	22	86	95	80	130	103	35	103	111	1923	1522	60	1718	2738	2206	3938	106	77	87	132	119	6	0	161
953	Positive	7.788	230.26659	Unknown	[M+H]+	null	null	null	null	null	200	176	237	204	229	237	208	250	138	167	115	158	119	77	13	0	60	52	63	36	57	63	52	20	229	162	12756	168	265	238	166	57	22	47	72	35	6	7	75
954	Positive	7.374	230.27010	Unknown	[M+H]+	null	null	null	null	null	5697	6216	8305	8974	7521	8417	8922	9030	5567	5867	3495	3827	4742	5115	0	8	41	57	33	28	30	64	31	116	6669	6461	52	8847	7512	7560	42	27	38	76	33	27	0	6	34
955	Positive	0.731	230.88788	Unknown	[M+H]+	null	null	null	null	null	7	8	6	0	5	13	7	5	5	10	5	0	7	16	2203	7611	327	288	209	239	177	262	311	294	4	10	17	14	10	5	94	278	288	271	280	263	2974	2458	370
956	Positive	0.509	230.88911	Unknown	[M+H]+	null	null	null	null	null	6	0	19	6	0	6	12	9	6	17	0	10	6	5	424	14837	708	448	775	440	797	710	1009	885	6	0	4	13	6	17	90	898	1039	976	1022	905	9563	5274	740
957	Positive	0.399	230.88954	Unknown	[M+H]+	null	null	null	null	null	0	0	19	15	0	13	0	9	0	17	0	10	6	0	435	3161	714	470	866	820	797	710	1009	1026	6	9	0	13	0	9	99	892	1034	967	936	905	17619	12332	706
958	Positive	0.426	230.90599	Unknown	[M+H]+	null	null	null	null	null	7	0	7	6	0	0	0	6	0	0	9	6	0	0	38	840	1872	1606	4125	4782	4852	5140	4576	4682	6	12	0	6	0	8	238	4353	3384	2654	5590	5443	1059	579	2255
959	Positive	1.034	230.95889	Unknown	[M+H]+	null	null	null	null	null	6830	6806	6806	6861	5944	6446	6764	6521	7429	7630	8383	7901	7251	6843	24	1	343	373	338	460	188	259	430	375	6487	6310	7404	6584	7505	6903	41	343	200	294	384	115	0	5	337
960	Positive	0.754	231.06374	no MS2: Phlorobenzophenone	[M+H]+	231.06519	C13H10O4	Benzophenones	CPEXFJVZFNYXGU-UHFFFAOYSA-N	O=C(C=1C=CC=CC1)C=2C(O)=CC(O)=CC2O	1	13	7	5	6	10	8	15	5	16	0	0	15	15	1080	55	80	119	89	70	113	82	80	142	8	0	16	9	5	5	101	40	79	115	118	121	30	25	87
961	Positive	1.206	231.11386	no MS2: 1-(3-(Trifluoromethyl)phenyl)piperazine	[M+H-H2O]+	231.11037	C11H13F3N2	Phenylpiperazines	KKIMDKMETPPURN-UHFFFAOYSA-N	c1c(C(F)(F)F)cccc1N1CCNCC1	270	243	227	180	302	305	260	355	320	350	364	364	154	102	133	179	520	424	359	851	533	491	413	349	616	533	206	162	181	135	461	734	622	551	568	466	127	115	458
962	Positive	0.354	231.12309	no MS2: NCGC00179744-02!(2S)-2-[(1S,2R)-1,2-dihydroxypentyl]-4-methoxy-2,3-dihydropyran-6-one [IIN-based: Match]	[M+H]+	231.12270	C11H18O5	Dihydropyranones	YLHOHANRUSKHKO-YWVKMMECSA-N	CCC[C@@H](O)[C@H](O)[C@@H]1CC(OC)=CC(=O)O1	18	11	4	26	30	42	27	35	29	24	37	24	20	37	122	723	168	182	265	253	182	186	262	116	55	30	23	52	34	33	88	232	268	286	229	173	1383	1908	206
963	Positive	0.404	231.13869	low score: Atractylenolide I	[M+H]+	231.13000	C15H18O2	Naphthofurans	ZTVSGQPHMUYCRS-SWLSCSKDSA-N	O=C1OC2=CC3(C)CCCC(=C)C3CC2=C1C	494	488	483	517	503	599	347	494	555	427	405	542	494	520	61	232	3183	3500	2775	3378	2829	3142	3478	3460	525	507	584	617	600	432	139	3514	3372	3466	3234	3196	87	578	3000
964	Positive	1.310	231.14206	low score: Atractylenolide I	[M+H]+	231.13000	C15H18O2	Naphthofurans	ZTVSGQPHMUYCRS-SWLSCSKDSA-N	O=C1OC2=CC3(C)CCCC(=C)C3CC2=C1C	350	363	385	260	278	273	308	334	302	324	346	361	361	330	42	95	1753	2609	1479	1899	2499	2168	2439	2024	378	360	392	319	308	392	158	2014	2440	2127	2404	2474	50	69	2472
965	Positive	0.721	231.87285	Unknown	[M+H]+	null	null	null	null	null	0	5	8	5	5	0	0	9	6	14	0	8	5	5	16	35	1646	1760	1565	1590	1596	1735	1371	1239	5	0	0	0	0	0	404	1987	1858	1819	1498	1241	40	74	1721
966	Positive	0.561	231.87463	Unknown	[M+H]+	null	null	null	null	null	6	11	6	9	6	6	0	6	6	14	6	8	0	5	5	214	1503	1820	1728	1505	1720	1725	1507	1539	0	0	6	6	0	6	387	1474	1700	1937	1626	1511	96	103	1699
967	Positive	3.238	232.15413	no MS2: NCGC00380830-01!methyl 2-[(2-hydroxy-3-methylbutanoyl)amino]-3-methylbutanoate [IIN-based: Match]	[M+H]+	232.15433	C11H21NO4	N-acyl-alpha amino acids and derivatives	DYTVYDVNJBXBMW-UHFFFAOYSA-N	COC(=O)C(NC(=O)C(O)C(C)C)C(C)C	25	13	21	22	9	32	14	16	21	30	19	28	13	9	16567	42	29	22	15	25	19	20	22	11	21	16	19	19	22	30	19	16	15	22	29	21	22	33	17
968	Positive	1.203	232.15521	Butyryl carnitine (isomer of 920); PlaSMA ID-919	[M+H]+	232.15530	C11H21NO4	Acyl carnitines	LRCNOZRCYBNMEP-UHFFFAOYNA-N	O=C([O-])CC(OC(=O)C(C)C)C[N+](C)(C)C	91	117	271	236	244	206	78	125	122	134	227	278	592	464	20	15543	500	263	538	521	844	1213	891	904	265	300	1863	1089	469	725	125	2359	890	677	645	756	690	627	660
969	Positive	2.923	232.15608	Butyryl carnitine (isomer of 920); PlaSMA ID-919	[M+H]+	232.15530	C11H21NO4	Acyl carnitines	LRCNOZRCYBNMEP-UHFFFAOYNA-N	O=C([O-])CC(OC(=O)C(C)C)C[N+](C)(C)C	24	11	24	23	17	27	14	18	22	20	12	21	14	19	11121	30	20	20	15	20	16	22	21	26	11	18	18	24	19	21	43	21	25	14	10	15	8	24	12
970	Positive	2.492	232.16971	low score: Alpha-pyrrolidinovalerophenone	[M+H]+	232.16959	C15H21NO	Alkyl-phenylketones	YDIIDRWHPFMLGR-UHFFFAOYSA-N	CCCC(C(=O)C1=CC=CC=C1)N2CCCC2	25	34	35	37	42	24	11	17	25	10	17	43	28	54	171	78	46	25	38	42	21	32	11	26	25	39	35	28	26	35	37447	26	20	21	31	35	61	65	38
971	Positive	0.376	232.88945	Unknown	[M+H]+	null	null	null	null	null	0	8	8	8	0	0	0	8	6	0	8	0	8	0	44	223	172	267	390	604	475	570	400	346	0	0	7	6	0	0	64	282	443	304	453	291	2302	3222	222
972	Positive	0.486	232.89130	Unknown	[M+H]+	null	null	null	null	null	6	7	6	8	12	0	0	0	6	0	9	0	6	0	43	1767	293	404	520	1020	693	838	564	530	0	0	0	6	0	0	82	604	416	525	891	649	994	681	445
973	Positive	1.066	232.89604	Unknown	[M+H]+	null	null	null	null	null	9	7	9	9	4	0	21	11	7	6	14	4	27	27	22	3205	209	256	382	458	426	364	260	259	10	8	32	27	32	8	28	440	316	443	316	319	5639	5745	544
974	Positive	0.846	232.89651	Unknown	[M+H]+	null	null	null	null	null	4	13	26	5	19	0	5	10	17	14	11	5	13	30	1636	368	51	168	101	89	96	42	81	81	4	11	18	28	18	16	429	220	170	46	61	34	456	202	151
975	Positive	0.427	232.90738	Unknown	[M+H]+	null	null	null	null	null	12	9	8	9	8	6	8	0	14	7	7	0	7	0	36	299	5466	4417	6856	7259	7314	7516	4585	6931	8	0	6	12	0	7	199	6978	5077	4712	9104	7611	207	284	4693
976	Positive	1.054	232.91142	Unknown	[M+H]+	null	null	null	null	null	755	696	729	824	666	833	847	716	780	942	1023	908	957	1017	0	582	12095	12145	13250	13916	12841	12929	11608	10819	1033	1124	1595	1216	729	663	74	10902	9577	9980	12815	12484	821	850	17981
977	Positive	0.862	232.91295	Unknown	[M+H]+	null	null	null	null	null	31	27	26	60	45	31	34	37	31	45	49	11	34	19	184	184	204	199	166	306	254	271	198	264	46	39	27	41	22	50	8031	298	397	107	207	340	160	185	152
978	Positive	1.036	232.95526	Unknown	[M+H]+	null	null	null	null	null	2301	2398	2231	2109	1896	2126	2300	2274	2449	2571	2850	2650	2499	2136	56	8	229	119	208	50	78	82	125	150	2003	2123	2517	2216	2478	2268	47	113	176	135	38	160	26	11	97
979	Positive	7.890	233.10912	N-Cyclohexyl-2-benzothiazol-amine	[M+H]+	233.11070	C13H16N2S	Benzothiazoles	UPWPIFMHSFSVLE-UHFFFAOYSA-N	C1CCC(CC1)NC1=NC2=CC=CC=C2S1	67	74	87	90	66	35	41	79	92	56	71	91	53	43	1284	487	156	98	173	70	191	102	152	170	76	40	72	52	38	61	367	174	161	191	147	96	569	454	106
980	Positive	7.698	233.12627	N-Cyclohexyl-2-benzothiazol-amine	[M+H]+	233.11070	C13H16N2S	Benzothiazoles	UPWPIFMHSFSVLE-UHFFFAOYSA-N	C1CCC(CC1)NC1=NC2=CC=CC=C2S1	77	82	120	84	106	77	41	91	77	97	98	117	78	133	144	132	1241	1055	979	1212	1417	1122	1511	1352	89	72	93	110	77	117	1475	1099	1259	1408	1476	1594	132	170	1252
981	Positive	13.014	233.13910	low score: 3-(sec-butyl)-2-hydroxy-3H-benzo[e][1,4]diazepin-5(4H)-one	[M+H]+	233.13000	C13H16N2O2	1,4-benzodiazepines	VKZICKDDJSFAAG-UHFFFAOYSA-N	O=C1NC(C(O)=NC=2C=CC=CC12)C(C)CC	1012	1076	1032	1049	1107	1374	1119	1275	1098	1235	1017	1246	934	906	133	15	118	109	80	38	155	74	108	129	1103	1157	973	983	878	1115	51	108	52	50	130	103	44	81	78
982	Positive	0.559	233.87108	Unknown	[M+H]+	null	null	null	null	null	6	0	0	0	0	0	0	0	0	0	0	10	5	0	5	59	840	1208	1084	1122	1012	999	834	752	7	0	0	6	0	0	206	925	1286	1396	823	824	45	129	1198
983	Positive	0.739	233.87299	Unknown	[M+H]+	null	null	null	null	null	0	11	0	0	0	0	0	0	5	0	0	0	12	9	23	23	1152	1167	958	1018	1011	1041	816	816	11	5	5	6	5	0	104	1186	901	1286	1023	896	85	58	1085
984	Positive	1.285	233.99649	Unknown	[M+H]+	null	null	null	null	null	11	2	10	0	7	12	6	5	0	10	0	5	0	0	8	10	1427	1075	1345	1355	1600	1714	1482	1317	6	0	5	14	8	0	794	1077	1739	1590	1288	1561	52	44	1616
985	Positive	1.166	233.99863	Unknown	[M+H]+	null	null	null	null	null	27	28	13	25	7	0	12	5	21	14	13	5	23	31	28	48	127	57	56	165	146	138	176	1317	6	0	21	12	16	22	3644	61	189	134	76	16	15	17	93
986	Positive	0.919	234.00005	Unknown	[M+H]+	null	null	null	null	null	7	22	4	9	10	9	12	9	10	24	22	9	18	30	49	12	1466	1220	1159	1011	403	1120	1350	1294	10	4	17	0	16	8	945	1606	1102	1715	1471	1515	35	17	2462
987	Positive	7.866	234.20633	Unknown	[M+H]+	null	null	null	null	null	1034	1207	1099	886	1107	1118	1202	1258	1328	1101	1420	1117	938	1253	31	32	72	77	149	123	137	88	71	92	1286	1375	1028	1051	1053	1120	95	39	109	72	92	63	50	7	102
988	Positive	0.509	234.88495	Unknown	[M+H]+	null	null	null	null	null	0	0	0	0	0	6	0	0	6	0	0	6	14	5	62	1069	234	227	137	327	227	253	185	310	0	0	0	10	11	9	98	240	412	347	258	191	705	506	307
989	Positive	0.399	234.88733	Unknown	[M+H]+	null	null	null	null	null	0	0	0	0	0	6	0	0	0	0	0	0	14	0	48	12	234	209	293	518	394	428	561	357	0	0	0	10	11	0	97	352	504	432	392	386	1031	1634	436
990	Positive	1.067	234.89612	Unknown	[M+H]+	null	null	null	null	null	17	3	12	15	7	9	7	4	1	9	17	11	22	26	0	1305	453	306	699	905	689	570	641	198	0	14	30	40	23	23	15	757	420	574	567	553	1723	2327	946
991	Positive	0.427	234.90250	Unknown	[M+H]+	null	null	null	null	null	0	0	6	6	9	6	7	6	8	0	0	8	10	7	125	79	2316	1848	2767	3023	3083	3339	2089	2582	0	0	0	0	11	14	71	2776	1930	1755	3476	3262	100	312	1967
992	Positive	0.885	234.91046	Unknown	[M+H]+	null	null	null	null	null	14	10	13	11	5	7	12	20	13	10	5	20	2	13	81	64	111	105	100	250	108	328	319	351	9	16	11	21	10	12	2434	225	238	87	358	380	40	55	172
993	Positive	1.045	234.91147	Unknown	[M+H]+	null	null	null	null	null	286	249	315	324	398	252	295	208	272	256	340	234	372	322	0	81	4850	4553	4395	4832	4624	3517	4088	2836	271	391	527	365	222	201	26	4305	3565	3373	4382	4636	71	170	6168
994	Positive	9.901	235.16864	Walleminone	[M-H2O+H]+	235.16925	C15H24O3	Sesquiterpenoids	NGQXJSTYWWTPOG-VGYDOTAVSA-N	C[C@H]1[C@@H]([C@@H](CC(=C)[C@@H]2CC([C@@H]2CC1=O)(C)C)O)O	121	97	110	112	80	77	120	76	54	88	123	103	155	114	3988	2562	278	147	261	226	266	281	288	382	90	99	122	87	92	173	332	215	355	266	320	234	2626	2824	219
995	Positive	1.363	235.18164	no MS2: Lidocaine	[M+H]+	235.18050	C14H22N2O	m-Xylenes	NNJVILVZKWQKPM-UHFFFAOYSA-N	OC(=NC=1C(=CC=CC1C)C)CN(CC)CC	355	396	368	389	348	291	430	380	360	415	228	351	547	378	287	354	1917	1779	1685	1984	2354	2158	2204	2084	392	352	485	439	491	555	1632	1774	2232	2012	2115	2326	152	236	1992
996	Positive	0.933	235.18311	no MS2: Lidocaine	[M+H]+	235.18050	C14H22N2O	m-Xylenes	NNJVILVZKWQKPM-UHFFFAOYSA-N	OC(=NC=1C(=CC=CC1C)C)CN(CC)CC	416	499	352	579	355	352	352	382	521	405	335	366	699	724	166	95	860	1170	914	783	817	648	580	548	387	388	666	697	641	784	2211	618	816	730	802	568	23	73	622
997	Positive	9.853	235.18507	low score: Angustifoline	[M+H]+	235.18050	C14H22N2O	Quinolizidinones	VTIPIBIDDZPDAV-IFWUJCSASA-N	C=CC[C@@H]1NCC2CC1CN1[C@@H]2CCCC1=O	842	796	871	816	837	925	855	891	722	955	643	559	854	726	353	369	4378	4574	6360	7008	7503	7316	8958	9447	703	772	451	905	864	988	7291	4330	5334	5490	8863	8529	350	324	4748
998	Positive	12.402	235.18756	low score: Angustifoline	[M+H]+	235.18050	C14H22N2O	Quinolizidinones	VTIPIBIDDZPDAV-IFWUJCSASA-N	C=CC[C@@H]1NCC2CC1CN1[C@@H]2CCCC1=O	390	470	445	351	455	420	416	393	471	471	426	404	427	548	75	79	2373	2242	2567	2791	2644	2678	3006	2795	395	403	416	410	470	429	1914	2143	2598	2606	2534	2864	77	157	2331
999	Positive	0.656	235.18919	no MS2: Lidocaine	[M+H]+	235.18050	C14H22N2O	m-Xylenes	NNJVILVZKWQKPM-UHFFFAOYSA-N	OC(=NC=1C(=CC=CC1C)C)CN(CC)CC	612	623	674	542	598	533	616	644	577	648	628	655	659	674	164	142	2129	2363	2554	2156	2680	2467	2490	2195	692	620	534	668	549	646	1627	2334	2632	2293	2576	2635	215	291	2380
1000	Positive	0.789	235.20364	low score: Unknown (carbon number 16); PlaSMA ID-945	[M+H]+	235.20320	C16H26O	Unknown	null	null	217	149	155	140	151	217	169	180	148	168	143	159	47	72	917	2841	521	522	485	467	430	511	527	423	167	137	39	49	53	60	214	411	492	447	533	635	2885	3247	500
1001	Positive	1.741	235.22217	low score: (1R,2R,5R,7S)-2-cyclopentyl-5,7-dimethyl-1,3-diazaadamantane	[M+H]+	235.22000	C15H26N2	Diazinanes	ZKHXDVJFFSPXFK-QKDCVEJESA-N	N12CC3(C)CN(CC(C)(C1)C3)C2C4CCCC4	342	366	364	317	309	326	344	343	358	308	380	314	407	411	289	155	7605	6988	6575	6479	7468	6984	6368	6978	368	294	418	302	424	308	6223	7361	7335	6611	7133	7142	197	132	7451
1002	Positive	0.065	235.22267	no MS2: (1R,2R,5R,7S)-2-cyclopentyl-5,7-dimethyl-1,3-diazaadamantane	[M+H]+	235.22000	C15H26N2	Diazinanes	ZKHXDVJFFSPXFK-QKDCVEJESA-N	N12CC3(C)CN(CC(C)(C1)C3)C2C4CCCC4	319	344	396	398	504	314	334	452	316	344	341	316	368	378	152	103	13570	12850	12846	12514	13028	13058	12977	13220	316	318	323	292	405	334	6348	10688	13444	11248	13657	14228	227	173	12965
1003	Positive	0.555	235.22269	no MS2: (1R,2R,5R,7S)-2-cyclopentyl-5,7-dimethyl-1,3-diazaadamantane	[M+H]+	235.22000	C15H26N2	Diazinanes	ZKHXDVJFFSPXFK-QKDCVEJESA-N	N12CC3(C)CN(CC(C)(C1)C3)C2C4CCCC4	260	305	330	394	241	349	293	332	330	430	376	405	369	419	137	99	7275	7491	6923	6564	7166	7118	6574	6901	381	297	372	458	384	395	5966	7155	7649	7089	7234	7283	130	133	7391
1004	Positive	14.723	235.22308	no MS2: (1R,2R,5R,7S)-2-cyclopentyl-5,7-dimethyl-1,3-diazaadamantane	[M+H]+	235.22000	C15H26N2	Diazinanes	ZKHXDVJFFSPXFK-QKDCVEJESA-N	N12CC3(C)CN(CC(C)(C1)C3)C2C4CCCC4	205	235	340	277	377	233	234	299	309	265	331	276	281	276	75	21	7822	8734	10348	10999	11069	10553	11096	11066	282	217	237	325	310	267	6413	8141	9182	10039	10691	10943	193	1469	9589
1005	Positive	0.624	235.22392	low score: (1R,2R,5R,7S)-2-cyclopentyl-5,7-dimethyl-1,3-diazaadamantane	[M+H]+	235.22000	C15H26N2	Diazinanes	ZKHXDVJFFSPXFK-QKDCVEJESA-N	N12CC3(C)CN(CC(C)(C1)C3)C2C4CCCC4	527	370	340	394	331	369	368	341	435	481	378	431	411	411	124	64	7317	7412	6923	6718	7405	7441	6770	6990	405	385	380	458	308	393	6117	7134	7864	7025	7531	7283	108	161	7379
1006	Positive	0.428	236.85028	Unknown	[M+H]+	null	null	null	null	null	6	24	0	0	0	6	7	0	7	6	0	0	0	0	5	26	307	384	482	909	955	852	1745	1609	7	0	0	0	6	6	111	968	739	998	981	805	76	54	457
1007	Positive	0.757	236.85045	Unknown	[M+H]+	null	null	null	null	null	5	5	0	0	0	5	6	0	0	8	9	0	5	5	10	103	570	624	1047	1216	1415	1513	1268	1355	5	0	7	8	5	5	105	887	835	952	1449	1160	57	82	629
1008	Positive	0.351	236.90698	Unknown	[M+H]+	null	null	null	null	null	7	0	8	0	0	0	8	7	8	7	0	0	0	0	69	422	433	395	244	810	689	327	207	582	7	0	6	0	0	0	34	528	30	30	14	552	1964	2147	8
1009	Positive	1.329	237.00914	no MS2: Methazolamide	[M+H]+	237.01106	C5H8N4O3S2	Thiadiazole sulfonamides	FLOSMHQXBMRNHR-DAXSKMNVSA-N	C1(/SC(S(N)(=O)=O)=NN1C)=N/C(C)=O	13	29	20	33	22	69	45	22	29	26	65	51	34	66	42	1329	195	211	108	171	254	107	284	86	34	54	11	12	33	53	111	106	351	442	172	122	1571	1193	175
1010	Positive	0.800	237.14444	no MS2: NCGC00380929-01_C14H22O4_(2E)-2-(Hydroxymethyl)-3-[(1R,6R)-3-(hydroxymethyl)-6-isopropyl-2-cyclohexen-1-yl]acrylic acid	[M-H2O+H]+	237.14851	C14H22O4	Menthane monoterpenoids	SLVSUVFUFJKMCV-URFGDBDFSA-N	CC(C)[C@H]1CC\C(=C/[C@@H]1/C=C(CO)/C(O)=O)CO	75	34	40	43	60	50	75	50	52	62	36	56	34	45	1350	80	35	50	45	42	9	70	9	90	28	53	37	35	31	50	114	24	103	38	46	51	133	129	82
1011	Positive	0.814	237.16281	no MS2: Procaine	[M+H]+	237.15976	C13H20N2O2	Benzoic acid esters	MFDFERRIHVXMIY-UHFFFAOYSA-N	CCN(CC)CCOC(=O)C1=CC=C(N)C=C1	81	53	53	86	88	87	73	57	61	101	45	72	70	66	162	143	100	87	142	79	61	110	52	199	50	46	80	92	61	92	1349	73	69	114	121	158	180	194	132
1012	Positive	0.962	237.16322	no MS2: Procaine	[M+H]+	237.15976	C13H20N2O2	Benzoic acid esters	MFDFERRIHVXMIY-UHFFFAOYSA-N	CCN(CC)CCOC(=O)C1=CC=C(N)C=C1	219	317	250	284	173	287	202	239	351	243	318	335	380	379	180	67	1042	1348	1396	1504	1689	1805	1810	1973	255	304	237	237	324	402	92	1356	901	1132	1820	2112	94	90	1831
1013	Positive	7.405	237.20164	Unknown	[M+H]+	null	null	null	null	null	390	333	406	317	399	533	406	383	394	441	418	447	305	362	72	90	1783	1871	1708	2211	2336	2165	1895	2286	420	434	376	329	283	337	2935	1918	1671	1833	2026	2385	74	109	1302
1014	Positive	1.328	237.21141	no MS2: Velvione	[M+H]+	237.22130	C16H28O	Cyclic ketones	ABRIMXGLNHCLIP-UHFFFAOYSA-N	O=C1CCCCCCCCCCC=CCCC1	242	228	194	189	189	307	231	206	184	199	237	160	97	167	206	22	484	715	392	754	1028	1078	1445	1325	249	243	204	118	112	122	175	459	1070	902	1096	1405	6	28	615
1015	Positive	14.291	237.21239	no MS2: Velvione	[M+H]+	237.22130	C16H28O	Cyclic ketones	ABRIMXGLNHCLIP-UHFFFAOYSA-N	O=C1CCCCCCCCCCC=CCCC1	153	152	209	179	205	169	208	136	170	184	164	172	138	122	28	241	4028	4912	7026	7615	8478	8575	10318	9605	158	143	43	83	83	95	2373	2943	6339	6634	9765	9757	128	1054	4524
1016	Positive	0.319	237.21320	low score: Velvione	[M+H]+	237.22130	C16H28O	Cyclic ketones	ABRIMXGLNHCLIP-UHFFFAOYSA-N	O=C1CCCCCCCCCCC=CCCC1	57	84	136	161	211	162	162	126	166	122	192	155	131	131	312	54	4506	5891	7533	8068	8698	8870	11530	11422	154	164	77	46	92	118	222	4673	6503	6993	10408	10511	50	86	5396
1017	Positive	8.819	237.21333	no MS2: Velvione	[M+H]+	237.22130	C16H28O	Cyclic ketones	ABRIMXGLNHCLIP-UHFFFAOYSA-N	O=C1CCCCCCCCCCC=CCCC1	99	286	189	229	157	222	109	101	242	276	313	114	63	52	81	313	1242	1901	2384	2607	3456	3300	3754	3619	147	263	166	153	169	180	952	1156	2195	2394	3716	3535	106	220	1871
1018	Positive	9.138	237.21495	no MS2: Velvione	[M+H]+	237.22130	C16H28O	Cyclic ketones	ABRIMXGLNHCLIP-UHFFFAOYSA-N	O=C1CCCCCCCCCCC=CCCC1	162	145	139	206	128	170	118	142	162	288	157	244	104	68	159	25	1754	1906	2175	3047	3353	3221	3742	4262	94	265	36	50	87	114	802	1233	1940	1340	4040	4337	101	100	1840
1019	Positive	0.089	237.22221	no MS2: Velvione	[M+H]+	237.22130	C16H28O	Cyclic ketones	ABRIMXGLNHCLIP-UHFFFAOYSA-N	O=C1CCCCCCCCCCC=CCCC1	45	49	26	39	71	60	60	67	66	32	59	36	64	38	1629	104	1080	1483	1742	1985	2759	3446	4247	4281	41	70	53	38	46	75	137	684	1990	1845	3076	3279	138	201	1162
1020	Positive	12.143	237.23683	Unknown	[M+H]+	null	null	null	null	null	36	51	72	34	61	72	86	52	61	74	60	49	47	43	0	100	2963	3042	8204	8290	4821	5535	8428	10290	45	71	44	41	71	31	871	2377	3781	3723	2783	2943	63	49	5051
1021	Positive	12.314	237.23802	Unknown	[M+H]+	null	null	null	null	null	55	52	88	79	68	78	46	63	61	55	53	76	82	28	0	0	1259	1479	2624	2608	1934	1961	2757	2572	61	50	62	38	40	20	2594	1306	1966	1946	1596	1790	7	11	1881
1022	Positive	0.443	237.88057	Unknown	[M+H]+	null	null	null	null	null	6	11	0	0	0	0	0	7	0	0	0	6	0	0	9	32	696	810	481	696	401	700	1506	1350	11	0	0	0	0	0	196	617	1255	1376	659	1041	147	184	1348
1023	Positive	0.816	237.94379	Unknown	[M+H]+	null	null	null	null	null	0	6	28	17	13	16	4	5	2	11	5	10	5	1	12	2329	442	323	745	445	381	489	339	334	9	10	20	24	21	17	254	545	416	421	359	354	1477	1088	305
1024	Positive	0.681	237.94550	Unknown	[M+H]+	null	null	null	null	null	13	23	15	4	6	16	12	20	12	15	10	9	21	48	1172	2396	265	322	575	554	495	369	391	420	16	22	25	8	43	34	195	536	502	545	529	486	1816	1034	589
1025	Positive	0.747	237.96608	Unknown	[M+H]+	null	null	null	null	null	1345	1344	1282	1375	1435	1425	1439	1338	1395	1489	1306	1399	1332	1326	48	86	206	275	265	255	169	180	89	115	1393	1318	1070	1048	1297	1342	319	212	127	239	241	134	73	64	156
1026	Positive	0.694	238.84567	Unknown	[M+H]+	null	null	null	null	null	5	5	6	0	0	5	0	10	0	6	5	0	0	5	5	14	1134	1318	1979	2139	2201	2569	2421	2314	5	6	5	10	5	0	164	1327	1721	1718	2519	2300	18	14	1297
1027	Positive	0.430	238.84985	Unknown	[M+H]+	null	null	null	null	null	0	0	0	0	0	8	0	11	0	0	9	0	0	7	5	6	272	736	2708	2787	3170	3145	4384	3664	0	0	0	0	8	6	133	2234	2647	2933	3446	3263	76	19	1890
1028	Positive	0.425	238.90019	Unknown	[M+H]+	null	null	null	null	null	0	0	6	8	10	12	0	0	8	6	0	0	0	9	24	84	540	489	1031	918	1076	985	757	784	0	7	6	6	6	6	94	440	942	684	1140	950	294	653	572
1029	Positive	0.755	238.93080	Unknown	[M+H]+	null	null	null	null	null	4	5	0	5	12	12	5	0	9	5	5	5	16	21	799	1614	225	268	178	233	171	291	125	178	5	21	10	8	6	22	169	238	218	342	192	215	2044	2172	198
1030	Positive	1.359	239.01796	low score: 3-(2-Aminoethyl)-5-bromoindole	[M+H]+	239.01784	C10H11BrN2	Tryptamines and derivatives	CGHUQJRRADEHTQ-UHFFFAOYSA-N	BrC1=CC=C(NC=C2CCN)C2=C1	20	1	5	6	0	14	0	0	5	6	10	6	0	0	36	3442	704	610	478	293	542	643	214	336	0	12	6	22	0	6	119	982	656	713	239	237	6486	7642	839
1031	Positive	1.273	239.03529	low score: 4-methoxy-7H-furo[3,2-g]chromen-7-one	[M+Na]+	239.03000	C12H8O4	5-methoxypsoralens	BGEBZHIAGXMEMV-UHFFFAOYSA-N	O=C1OC=2C=C3OC=CC3=C(OC)C2C=C1	16	18	20	10	11	10	5	1	3	19	31	8	14	4	19	260	6683	6810	4005	4438	5247	4636	5638	5239	3	59	19	13	21	16	158	6635	5671	5889	4421	5065	276	271	6167
1032	Positive	7.654	239.14673	no MS2: Pentaethylene glycol	[M+H]+	239.14891	C10H22O6	Polyethylene glycols	JLFNLZLINWHATN-UHFFFAOYSA-N	OCCOCCOCCOCCOCCO	841	136	149	171	163	192	132	249	136	176	126	220	159	253	1092	949	1125	1186	1233	1191	1042	1168	1257	1151	219	134	249	150	205	155	1524	971	1062	1008	1263	1242	913	950	1003
1033	Positive	6.002	239.14911	low score: Pentaethylene glycol	[M+H]+	239.14891	C10H22O6	Polyethylene glycols	JLFNLZLINWHATN-UHFFFAOYSA-N	OCCOCCOCCOCCOCCO	104	90	64	43	92	79	121	73	110	98	116	109	163	180	6192	4182	801	889	895	816	899	612	560	972	113	59	241	203	228	212	959	674	815	852	806	805	4000	4494	759
1034	Positive	6.536	239.15971	low score: OMEGA-HYDROXYDODECANOATE	[M+Na]+	239.16176	C12H24O3	Medium-chain hydroxy acids and derivatives	ZDHCZVWCTKTBRY-UHFFFAOYSA-N	OCCCCCCCCCCCC(O)=O	284	259	412	339	304	306	299	255	430	424	300	338	444	434	1860	1820	1610	1647	1485	1773	1718	1464	1588	1440	248	294	451	577	416	504	2896	1704	1765	1596	1650	1446	1818	2067	1577
1035	Positive	9.646	239.16013	low score: OMEGA-HYDROXYDODECANOATE	[M+Na]+	239.16176	C12H24O3	Medium-chain hydroxy acids and derivatives	ZDHCZVWCTKTBRY-UHFFFAOYSA-N	OCCCCCCCCCCCC(O)=O	208	253	242	256	346	122	280	101	189	396	280	107	211	367	4664	2439	1054	788	828	962	1014	968	957	986	275	327	387	259	366	182	1027	834	975	1074	888	937	3006	3688	895
1036	Positive	0.800	239.16039	no MS2: OMEGA-HYDROXYDODECANOATE	[M+Na]+	239.16176	C12H24O3	Medium-chain hydroxy acids and derivatives	ZDHCZVWCTKTBRY-UHFFFAOYSA-N	OCCCCCCCCCCCC(O)=O	138	126	148	108	114	92	73	82	71	120	99	102	133	138	20647	795	219	243	135	115	148	79	83	93	96	100	146	124	117	136	768	105	188	172	146	98	18942	1019	212
1037	Positive	8.798	239.16145	low score: OMEGA-HYDROXYDODECANOATE	[M+Na]+	239.16176	C12H24O3	Medium-chain hydroxy acids and derivatives	ZDHCZVWCTKTBRY-UHFFFAOYSA-N	OCCCCCCCCCCCC(O)=O	238	405	345	351	277	350	267	269	276	208	352	352	468	374	6258	4253	1111	882	1038	1386	1056	1244	1304	1287	381	246	374	240	390	353	1055	1200	1132	1215	1251	1176	3997	4456	1157
1038	Positive	0.924	239.16219	low score: OMEGA-HYDROXYDODECANOATE	[M+Na]+	239.16176	C12H24O3	Medium-chain hydroxy acids and derivatives	ZDHCZVWCTKTBRY-UHFFFAOYSA-N	OCCCCCCCCCCCC(O)=O	135	513	248	446	344	494	542	245	455	421	580	268	671	622	3276	15366	1419	999	998	1708	1429	1518	967	944	503	274	136	831	868	823	846	1427	1342	1051	1277	1450	18974	18718	1680
1039	Positive	6.022	239.16608	low score: OMEGA-HYDROXYDODECANOATE	[M+Na]+	239.16176	C12H24O3	Medium-chain hydroxy acids and derivatives	ZDHCZVWCTKTBRY-UHFFFAOYSA-N	OCCCCCCCCCCCC(O)=O	4617	4604	4979	4634	5072	4816	5474	4918	4317	4812	4669	4865	5991	5619	1233	1356	20226	21413	21760	21003	21926	22911	20702	20905	5101	4792	5410	6117	5701	5752	21014	19822	21867	21500	20639	20983	1293	1529	21097
1040	Positive	6.239	239.16733	no MS2: 3-hydroxy-5,5,8a-trimethyl-3,4,4a,6,7,8-hexahydronaphthalene-2-carboxylic acid	[M+H]+	239.16417	C14H22O3	Beta hydroxy acids and derivatives	LQZXAHKUYJVAAR-UHFFFAOYSA-N	O=C(O)C1=CC2(C)CCCC(C)(C)C2CC1O	1441	1439	1446	1275	1433	1321	1298	1390	1265	1207	1281	1404	1741	1825	1125	1302	3931	3557	3805	3676	3512	3834	3530	3409	1309	1216	1861	1682	1648	1611	4361	4112	3804	3854	3519	3807	1332	1508	3665
1041	Positive	0.340	239.17796	Unknown	[M+H]+	null	null	null	null	null	1773	1653	1670	1722	1976	1735	1771	1467	2019	1926	1698	1710	1909	2178	97	166	4564	5667	6406	6724	6834	7151	7354	7513	1311	1391	1709	1360	1750	2119	1157	4636	6795	6141	7793	7520	354	410	5102
1042	Positive	1.213	239.17865	Unknown	[M+H]+	null	null	null	null	null	3765	3624	3567	3868	3586	3750	4254	3181	4057	4158	3782	3885	4248	4140	95	266	6568	8988	8125	7593	8724	8818	6852	7315	4211	3488	3671	3641	3966	3864	3502	7123	10235	7745	8818	8857	193	213	8628
1043	Positive	0.838	239.17902	Unknown	[M+H]+	null	null	null	null	null	794	660	916	743	743	580	715	594	686	875	1237	919	1066	640	1022	126	938	756	625	794	965	664	2153	2565	567	477	712	722	1121	629	22587	1003	950	678	2276	3851	1028	897	1057
1044	Positive	13.503	239.17955	Unknown	[M+H]+	null	null	null	null	null	1085	1275	957	793	1252	1214	1133	1120	1104	2051	2021	1466	967	1089	13	152	4196	4510	4805	4838	4862	4368	4588	4868	1042	854	884	1384	1096	1020	4139	4727	3810	4529	4039	4396	231	151	4374
1045	Positive	0.979	239.17970	Unknown	[M+H]+	null	null	null	null	null	13670	14138	15164	16449	13826	14891	16665	14689	17072	17128	14228	14879	15825	15252	64	855	25442	24227	23508	23856	25989	27571	24926	25635	13019	13230	11289	13841	16691	17403	1296	24471	30003	24610	27533	32284	1028	897	30021
1046	Positive	8.750	239.18002	Unknown	[M+H]+	null	null	null	null	null	548	607	385	767	527	546	580	507	1150	872	876	828	543	758	383	175	2382	2170	2199	1941	2012	2399	2358	2244	733	1368	3599	538	574	753	2756	2130	2323	2087	2416	2590	167	259	1950
1047	Positive	9.084	239.18121	Unknown	[M+H]+	null	null	null	null	null	3070	2700	2652	2294	3237	3287	2952	2573	2404	3363	3286	2865	2593	1991	50	173	2238	2330	2232	1910	2276	3384	3212	2774	1571	1443	375	2158	1959	1779	2382	2516	2700	2143	1536	2151	146	184	2466
1048	Positive	8.247	239.18176	Unknown	[M+H]+	null	null	null	null	null	2876	2754	3141	2837	2812	3691	2932	3392	2889	3409	3532	3089	2248	2190	114	184	1889	1982	1757	1631	1801	1952	1786	1912	1774	1529	4044	2690	1536	2065	2186	2055	1842	1754	1755	1909	128	112	1742
1049	Positive	8.388	239.18230	Unknown	[M+H]+	null	null	null	null	null	3307	3207	3521	3073	3470	3644	3446	2840	3106	3882	3239	3242	2742	2116	160	128	1820	1923	1565	1516	1615	1994	1608	1578	1419	1480	3447	2766	1979	2206	2126	1813	1662	1645	1755	1628	101	170	1619
1050	Positive	10.674	239.18285	Unknown	[M+H]+	null	null	null	null	null	2659	3104	3127	2847	2915	3408	2793	2830	2910	3101	2790	2775	2764	1966	76	106	1917	1922	1849	2098	2083	1721	2198	2328	1798	1842	3050	2533	2319	2056	2597	2131	2046	2248	2104	2186	137	79	1857
1051	Positive	7.646	239.18369	Unknown	[M+H]+	null	null	null	null	null	3846	3816	4222	3838	3676	3820	3260	2891	3463	4303	3038	3664	2939	2369	120	74	1946	1954	1712	1565	1773	1689	1813	1689	1932	1771	4178	3394	1904	2250	2161	1829	1886	1522	1555	1714	60	94	1713
1052	Positive	13.160	239.18402	Unknown	[M+H]+	null	null	null	null	null	2087	2319	2494	2208	2318	2093	2515	2501	2375	2356	2466	1974	2146	2212	107	110	2978	3046	3419	3422	3653	3353	3560	3415	1397	1505	1974	1988	1980	1745	3671	3676	3171	3440	3416	3398	22	113	3282
1053	Positive	9.504	239.18456	Unknown	[M+H]+	null	null	null	null	null	3325	3315	3910	4054	3959	4068	4407	3681	3355	3350	3039	3088	2855	2276	109	80	1864	1947	1608	1699	1696	1860	1935	2032	2509	2306	350	2280	2997	2957	2362	2014	1691	1912	1715	1987	102	67	1534
1054	Positive	1.081	239.21277	Unknown	[M+H]+	null	null	null	null	null	55	50	100	61	50	69	119	87	35	66	80	62	83	71	36	24	3586	3373	2728	3185	2703	3169	2964	2886	86	48	100	65	67	70	138	3242	3444	3332	2828	3195	8	5	3609
1055	Positive	13.583	239.23680	Unknown	[M+H]+	null	null	null	null	null	75	72	50	58	52	38	79	86	33	32	71	64	79	53	83	1370	162	224	235	200	213	306	151	149	37	17	17	69	30	46	222	134	257	259	226	198	444	755	218
1056	Positive	12.808	239.23740	Unknown	[M+H]+	null	null	null	null	null	89	43	54	57	26	40	30	61	11	62	77	37	74	31	9551	1309	160	144	124	123	109	140	155	79	20	62	48	46	69	47	89	96	117	96	153	245	335	11280	136
1057	Positive	12.572	239.23816	Unknown	[M+H]+	null	null	null	null	null	45	56	50	51	60	56	28	77	65	67	38	74	19	29	737	14846	3312	1815	2286	1725	1410	1058	1016	1158	62	63	16	15	41	39	1861	2024	1540	1587	1021	1007	377	574	278
1058	Positive	12.464	239.23955	Unknown	[M+H]+	null	null	null	null	null	48	57	61	79	44	51	28	73	37	64	48	27	45	38	710	558	4376	3960	2257	4127	1433	2851	2540	2520	51	53	12	33	21	39	112	4351	2301	2735	2274	2879	4047	80	1864
1059	Positive	13.601	239.25258	Unknown	[M+H]+	null	null	null	null	null	63	69	54	101	53	20	87	61	41	27	54	40	28	80	0	173	877	1166	1018	2995	885	953	1270	1162	76	70	165	78	81	65	3036	788	2879	1248	1112	1064	0	53	855
1060	Positive	12.664	239.25438	Unknown	[M+H]+	null	null	null	null	null	40	35	20	30	39	33	38	54	37	27	34	38	61	59	40	1237	4500	4719	2736	3068	2296	2335	3044	2929	27	42	21	26	17	17	37165	3696	2682	2652	3033	2852	0	209	2643
1061	Positive	12.510	239.25481	Unknown	[M+H]+	null	null	null	null	null	39	19	51	21	29	35	52	31	25	44	34	18	41	13	100	701	47670	48280	27726	26387	19300	21878	21779	24852	45	38	45	16	33	33	242	36140	24751	24448	21376	22162	139	8	20304
1062	Positive	12.361	239.25484	Unknown	[M+H]+	null	null	null	null	null	26	40	34	27	45	38	69	5	25	51	36	15	22	24	0	4	491	426	473	378	392	598	599	536	19	63	30	18	13	39	1860	425	379	224	395	377	10	8	582
1063	Positive	13.489	239.25484	Unknown	[M+H]+	null	null	null	null	null	297	398	528	726	252	200	360	418	371	186	284	243	406	412	0	58	2685	2941	3080	2905	2589	2970	3772	4021	477	287	4347	320	259	367	201	2788	2879	2709	1902	2252	14	30	3341
1064	Positive	12.182	239.25531	Unknown	[M+H]+	null	null	null	null	null	34	41	52	35	45	57	28	44	45	51	46	23	41	35	0	57	1546	1744	1432	1228	1181	1482	1584	1928	27	54	36	42	34	31	281	1510	1480	1426	1453	1483	15	0	1352
1065	Positive	13.352	239.25905	Unknown	[M+H]+	null	null	null	null	null	4857	5282	8810	9020	3616	3722	4728	4632	5011	5350	3319	3303	5654	5443	0	0	270	184	305	201	290	302	301	371	4451	4491	87	4349	4897	5212	226	193	318	352	333	352	14	8	356
1066	Positive	0.487	239.92633	Unknown	[M+H]+	null	null	null	null	null	12	28	59	48	11	21	24	31	44	27	22	35	31	12	31	27	950	931	729	1126	1018	1147	866	1033	25	16	28	33	15	45	313	715	975	1034	1048	1088	50	194	1181
1067	Positive	1.119	239.97121	no MS2: PRZ_M239	[M+H]+	239.97443	C8H8Cl3NO	Phenol ethers	SUSCJRQKCYABMX-UHFFFAOYSA-N	NCCOC1=C(Cl)C=C(Cl)C=C1Cl	0	11	5	0	0	7	0	4	4	0	0	12	6	6	43	32	47	0	0	0	3	0	49	0	0	0	1	15	4	4	1738	0	0	25	15	0	32	28	69
1068	Positive	1.178	240.11200	no MS2: (R)-2-amino-3-(1H-indol-3-yl)-N-methylpropanamide oxalate	[M+Na]+	240.11000	C12H15N3O	Tryptamines and derivatives	YCTBLMQFTMPXBD-SNVBAGLBSA-N	O=C(NC)C(N)CC1=CNC=2C=CC=CC21	78	108	108	112	75	100	59	106	107	144	199	203	167	154	223	227	72	64	117	274	209	208	134	179	187	84	226	118	112	138	52	176	280	220	294	74	62	32	208
1069	Positive	5.954	240.19760	low score: Isokobusone_major	[M+NH4]+	240.19580	C14H22O2	Cyclic alcohols and derivatives	BSFUDCIRZBAPDS-UHFFFAOYSA-N	C=C1CCC2C(CC2(C)C)C(=O)CCC1O	433	444	386	344	423	361	388	399	384	375	302	310	509	462	64	54	2037	2334	2637	2602	2883	2931	2912	2791	448	343	431	364	350	431	1765	1999	2614	2733	2990	2798	105	67	2363
1070	Positive	7.612	240.23186	low score: (4,8,8-trimethyldecahydro-1,4-methanoazulen-9-yl)methanol	[M+NH4]+	240.23219	C15H26O	Sesquiterpenoids	VZJHQHUOVIDRCF-UHFFFAOYSA-N	OCC1C2CCC3C2C(C)(C)CCCC13C	35	29	33	18	41	21	64	22	36	33	33	8	30	18	1633	984	172	216	215	188	220	186	199	126	33	32	27	16	10	9	427	336	174	214	291	222	1349	1190	315
1071	Positive	7.595	240.24855	Unknown	[M+H]+	null	null	null	null	null	35	23	31	26	64	45	69	38	23	21	43	10	44	36	59	136	8941	7582	6589	6208	5415	4917	4910	4832	30	30	55	16	30	43	13646	9286	6589	5981	5309	5090	72	103	7436
1072	Positive	0.231	240.24963	Unknown	[M+H]+	null	null	null	null	null	92	11	40	37	63	35	42	0	24	90	43	57	31	39	12	22	1331	1322	1307	1238	1367	1477	1442	1414	29	60	52	46	16	45	13	1293	1373	1398	1421	1186	0	12	1290
1073	Positive	1.242	240.25087	Unknown	[M+H]+	null	null	null	null	null	125	81	120	31	62	10	77	14	83	43	22	10	88	65	10	5	2826	2466	969	966	900	1002	1136	878	64	73	12	11	11	52	6	3462	1334	1237	867	940	0	0	2133
1074	Positive	0.345	240.25272	Unknown	[M+H]+	null	null	null	null	null	31	11	41	52	76	4	43	57	27	79	49	52	49	16	5	22	1426	1523	1309	1403	1251	1512	1462	1302	14	33	46	41	32	17	26	1416	1368	1548	1516	1172	0	0	1523
1075	Positive	7.728	240.25375	Unknown	[M+H]+	null	null	null	null	null	1034	791	652	730	786	832	707	698	746	694	715	757	440	617	3	44	2534	2248	2300	2173	1849	1975	1688	1742	988	920	369	477	634	661	2715	2429	2333	2094	1760	1728	8	16	2182
1076	Positive	0.432	240.84929	Unknown	[M+H]+	null	null	null	null	null	0	0	8	10	0	0	0	0	13	0	0	0	6	0	18	5	2055	1643	5424	5712	5352	5602	5478	5355	10	0	0	0	7	0	74	2423	4570	4522	5979	5237	33	17	2622
1077	Positive	0.843	240.96809	Unknown	[M+H]+	null	null	null	null	null	9	1	0	5	3	16	9	9	10	1	12	7	4	8	1631	234	104	118	74	62	26	92	62	45	4	3	0	2	4	0	1122	42	77	30	119	35	1313	1628	84
1078	Positive	0.926	240.96916	Unknown	[M+H]+	null	null	null	null	null	74	21	21	20	47	65	7	20	20	32	16	29	374	352	86	814	259	354	161	164	199	296	262	322	4	80	5	37	340	147	193	103	193	123	295	229	1294	1585	78
1079	Positive	1.016	240.98529	low score: Thiram	[M+H]+	240.99561	C6H12N2S4	Thiuram disulfides	KUAZQDVKQLNFPE-UHFFFAOYSA-N	CN(C)C(=S)SSC(=S)N(C)C	5997	5964	5430	5630	5428	5395	5563	5487	6113	6471	6904	6617	6084	5910	39	46	2293	2898	1851	2063	1670	1938	1821	2747	5471	5325	7710	5673	6125	5820	73	1356	2146	1528	1987	1778	83	111	3049
1080	Positive	1.359	241.01538	Unknown	[M+H]+	null	null	null	null	null	16	0	19	10	0	6	14	31	7	6	14	0	11	6	60	1655	731	211	286	186	622	362	280	257	11	6	6	1	7	0	261	804	479	462	407	403	3269	3748	644
1081	Positive	1.275	241.04846	low score: 1,4-dihydroxyanthraquinone	[M+H]+	241.04953	C14H8O4	Anthraquinones	GUEIZVNYDFNHJU-UHFFFAOYSA-N	O=C1C=2C=CC=CC2C(=O)C=3C(O)=CC=C(O)C13	207	180	228	188	157	139	271	297	202	237	173	161	203	228	26	127	7549	7590	5197	4924	4238	3752	5104	5109	279	249	181	229	310	316	160	6996	4698	4389	4955	4923	149	178	5077
1082	Positive	1.120	241.15413	no MS2: Alpha Cyperone	[M+Na]+	241.14999	C15H22O	Eudesmane, isoeudesmane or cycloeudesmane sesquiterpenoids	KUFXJZXMWHNCEH-DOMZBBRYSA-N	O=C1C(=C2CC(C(=C)C)CCC2(C)CC1)C	209	126	239	147	133	176	190	150	125	102	183	174	199	229	1763	354	143	166	94	176	284	237	220	35	177	168	86	105	123	138	155	128	374	216	104	265	253	204	246
1083	Positive	1.142	241.17053	no MS2: 3,3',5,5'-Tetramethylbenzidine	[M+H]+	241.16992	C16H20N2	Benzidines	UAIUNKRWKOVEES-UHFFFAOYSA-N	CC1=CC(=CC(C)=C1N)C1=CC(C)=C(N)C(C)=C1	638	747	532	502	434	551	815	783	705	587	735	709	892	875	248	112	599	433	362	584	545	603	610	544	746	689	948	568	777	640	2337	298	858	562	148	521	122	143	446
1084	Positive	8.798	241.17508	no MS2: N,N'-Dicyclohexylthiourea	[M+H]+	241.17329	C13H24N2S	Thioureas	KAJICSGLHKRDLN-UHFFFAOYSA-N	S=C(NC1CCCCC1)NC1CCCCC1	0	122	0	92	0	0	96	137	108	108	23	0	0	55	2851	2343	118	179	116	148	204	230	148	230	114	98	58	51	79	50	148	153	181	169	207	111	2108	1996	201
1085	Positive	9.038	241.19731	low score: h_14_19_norandrosterone	[M-2H2O+H]+	241.19508	C18H28O2	Estrogens and derivatives	UOUIARGWRPHDBX-CQZDKXCPSA-N	O[C@@H]1CC[C@@]2([H])[C@](CC[C@]3([H])[C@]2([H])CC[C@@]4(C)[C@@]3([H])CCC4=O)([H])C1	2116	2113	1999	2337	2028	2062	2269	2277	2225	2124	2545	2279	1568	2109	77	107	599	594	562	541	429	734	491	780	1951	2492	296	1353	1928	1576	389	340	341	518	559	519	98	215	504
1086	Positive	13.802	241.23192	Unknown	[M+H]+	null	null	null	null	null	61	92	43	70	52	32	61	69	56	52	73	100	71	66	10	64	408	387	943	1015	531	626	1006	959	52	72	41	89	43	57	237	353	564	746	612	734	30	54	515
1087	Positive	0.523	241.84709	Unknown	[M+H]+	null	null	null	null	null	0	9	6	6	8	0	0	0	0	0	6	0	7	0	5	1	1473	1376	1218	1316	1417	1620	1484	1758	0	6	0	0	0	0	412	2200	1127	1234	1791	1790	13	40	1139
1088	Positive	0.697	241.84921	Unknown	[M+H]+	null	null	null	null	null	5	0	0	0	0	9	0	0	0	0	6	0	0	4	6	19	1049	1258	1006	1355	1550	1277	1878	2023	5	5	5	0	5	0	674	1485	1226	1204	1451	1354	7	18	906
1089	Positive	0.492	241.88373	Unknown	[M+H]+	null	null	null	null	null	0	12	6	6	0	0	6	0	0	6	0	0	6	0	36	251	164	166	181	144	116	108	164	268	6	0	10	0	8	0	52	189	145	170	136	179	2291	4588	201
1090	Positive	0.734	241.90256	Unknown	[M+H]+	null	null	null	null	null	0	6	7	7	0	6	0	18	0	8	5	10	8	9	12	45	1889	1975	2217	2110	1888	1894	1848	1830	5	0	5	20	7	10	502	2099	2097	2080	1829	1792	102	150	2175
1091	Positive	0.596	241.90315	Unknown	[M+H]+	null	null	null	null	null	0	0	6	0	6	6	6	5	0	1	6	8	10	0	12	44	1714	1847	2393	2259	2202	2256	2086	2179	0	0	0	0	0	10	505	2002	2097	2270	2140	2127	102	221	1999
1092	Positive	1.174	242.11972	no MS2: n-methylflindersine	[M+H]+	242.12000	C15H15NO2	Pyranoquinolines	RJZFGBNKPOVCHQ-UHFFFAOYSA-N	O=C1C=2C=CC(OC2C=3C=CC=CC3N1C)(C)C	834	789	858	968	817	969	812	860	928	927	1016	957	523	679	102	96	738	371	589	946	931	738	124	655	1161	1169	1151	862	754	732	62	562	564	721	257	598	35	53	996
1093	Positive	8.056	242.14291	no MS2: Terbutryn	[M+H]+	242.14339	C10H19N5S	Methylthio-s-triazines	IROINLKCQGIITA-UHFFFAOYSA-N	CCNC1=NC(NC(C)(C)C)=NC(SC)=N1	109	6	47	28	11	22	17	29	22	6	21	18	20	31	4194	1762	87	102	41	72	44	102	50	116	1	22	37	37	21	21	111	74	116	59	70	80	1661	1573	84
1094	Positive	7.902	242.14314	Terbutryn	[M+H]+	242.14339	C10H19N5S	Methylthio-s-triazines	IROINLKCQGIITA-UHFFFAOYSA-N	CCNC1=NC(NC(C)(C)C)=NC(SC)=N1	22	19	47	9	3	12	14	14	21	23	14	17	29	40	1425	3162	53	101	77	78	106	87	57	102	21	22	37	32	46	54	119	57	49	102	66	93	3151	3242	66
1095	Positive	1.365	242.16057	no MS2: Unknown (carbon number 11); PlaSMA ID-998	[M+H]+	242.14900	C11H19N3O3	Unknown	null	null	711	731	718	791	652	673	746	722	657	874	583	701	810	837	43	84	1254	1104	991	1122	1387	1392	1122	1190	725	597	915	750	784	793	578	889	1256	1058	1224	1272	19	35	974
1096	Positive	9.051	242.16644	low score: NCGC00385536-01!(2E,4E)-N-(1,3-dihydroxy-3-methylpentan-2-yl)-2-methylhexa-2,4-dienamide [IIN-based on: CCMSLIB00000845102]	[M+H]+	242.17506	C13H23NO3	Tertiary alcohols	PHCDULUANYZTRK-RMTFUQJTSA-N	CCC(C)(O)C(CO)NC(=O)C(\\C)=C\\C=C\\C	1833	1930	1742	2476	1973	2037	1600	1909	1687	2333	2155	1962	1896	1380	205	109	1213	933	1275	1063	1443	904	1149	888	1410	1920	1417	1720	2110	1466	872	1057	1272	1034	766	1758	54	86	901
1097	Positive	7.403	242.29813	Unknown	[M+H]+	null	null	null	null	null	66	28	64	25	53	56	82	67	78	31	51	38	49	39	15	23	1073	1226	885	928	922	916	1002	853	66	62	78	41	59	47	1229	827	995	842	830	987	5	30	885
1098	Positive	0.429	242.84656	Unknown	[M+H]+	null	null	null	null	null	0	0	0	0	6	8	0	7	0	0	0	0	0	0	5	15	1523	1573	4167	4438	4560	4534	4000	3881	0	0	7	6	6	0	75	1785	3854	3421	4761	4582	0	21	2220
1099	Positive	1.034	242.92506	Unknown	[M+H]+	null	null	null	null	null	28	6	15	5	11	12	14	9	4	20	2	20	14	32	16	2889	206	243	242	302	229	177	196	147	10	8	37	21	22	7	23	210	103	167	218	246	3296	3831	238
1100	Positive	0.823	242.92531	Unknown	[M+H]+	null	null	null	null	null	17	24	4	17	21	11	26	10	22	10	21	13	17	20	7669	236	134	130	132	151	123	126	195	179	11	5	18	13	0	18	443	176	190	163	215	199	261	101	175
1101	Positive	0.862	242.94229	Unknown	[M+H]+	null	null	null	null	null	8	20	14	24	11	19	12	16	15	14	16	13	6	14	290	30	87	97	68	100	99	131	115	252	19	5	15	4	4	0	17531	197	88	123	122	132	49	71	78
1102	Positive	1.028	242.94270	Unknown	[M+H]+	null	null	null	null	null	216	365	465	432	480	371	359	320	228	283	385	406	606	374	39	332	7400	7273	8019	8366	7332	7100	6640	7197	534	508	933	652	328	171	21	7079	5545	5591	8489	8664	236	261	12791
1103	Positive	1.282	243.04228	no MS2: NCGC00385961-01_C11H11ClO4_1H-2-Benzopyran-1-one, 5-chloro-3,4-dihydro-8-hydroxy-6-methoxy-3-methyl-	[M+H]+	243.04187	C11H11ClO4	2-benzopyrans	WLUQQWRUOSZKGN-UHFFFAOYSA-N	COC1=CC(=C2C(=O)OC(C)CC2=C1Cl)O	55	51	57	33	41	50	69	45	17	40	41	43	79	88	38	170	1390	1290	753	854	726	734	974	847	81	76	46	117	50	27	170	1357	715	763	774	616	201	85	916
1104	Positive	6.283	243.13942	no MS2: NCGC00380444-01_C16H20O3_2-Naphthaleneacetic acid, 1,2,3,7,8,8a-hexahydro-8,8a-dimethyl-alpha-methylene-7-oxo-, methyl ester, (2R,8R,8aR)-	[M-H2O+H]+	243.13795	C16H20O3	Eremophilane, 8,9-secoeremophilane and furoeremophilane sesquiterpenoids	JGZDPLNVUOFETD-HWWQOWPSSA-N	COC(=O)C(=C)[C@@H]1C\C=C2\C=C/C(=O)[C@H](C)[C@@]2(C)C1	104	87	82	76	117	138	81	93	92	109	79	91	76	101	418	212	1196	1110	900	920	702	660	609	612	95	82	103	101	103	83	1863	1416	911	915	693	709	156	142	1152
1105	Positive	0.814	243.14024	no MS2: NCGC00380444-01_C16H20O3_2-Naphthaleneacetic acid, 1,2,3,7,8,8a-hexahydro-8,8a-dimethyl-alpha-methylene-7-oxo-, methyl ester, (2R,8R,8aR)-	[M-H2O+H]+	243.13795	C16H20O3	Eremophilane, 8,9-secoeremophilane and furoeremophilane sesquiterpenoids	JGZDPLNVUOFETD-HWWQOWPSSA-N	COC(=O)C(=C)[C@@H]1C\C=C2\C=C/C(=O)[C@H](C)[C@@]2(C)C1	16	33	20	11	11	5	22	17	12	13	14	24	26	14	129	110	355	366	223	163	157	162	224	69	35	20	25	41	12	7	1420	513	380	206	146	88	83	163	366
1106	Positive	0.592	243.82462	Unknown	[M+H]+	null	null	null	null	null	0	0	0	6	0	0	3	0	0	13	0	5	0	7	0	0	587	645	1248	1034	1217	1059	1095	1269	0	6	0	0	0	0	91	619	872	1085	1251	1362	3	12	879
1107	Positive	1.656	243.84161	Unknown	[M+H]+	null	null	null	null	null	0	5	5	5	5	11	5	5	5	0	6	5	4	0	10	91	1233	1372	1020	906	905	997	1228	1092	6	6	5	5	0	0	318	1126	1066	1250	1114	1170	86	106	1309
1108	Positive	0.603	243.84537	Unknown	[M+H]+	null	null	null	null	null	0	0	0	0	0	5	0	0	1	0	0	0	6	0	5	12	1485	1565	1451	1542	1598	1810	1810	2079	0	0	0	0	6	0	496	1919	1403	1396	1764	1885	6	15	1269
1109	Positive	0.476	243.84595	Unknown	[M+H]+	null	null	null	null	null	0	0	0	0	0	14	0	0	8	0	11	4	6	0	5	26	2351	2009	1442	1484	1772	1920	2238	2115	6	0	6	0	6	6	493	3440	1659	1507	1921	1836	53	26	2001
1110	Positive	7.292	244.19043	low score: NCGC00380112-01!2-(6-hydroxy-6-methyloctyl)-2H-furan-5-one	[M+NH4]+	244.19072	C13H22O3	Butenolides	SYVFGLXUEAXFAP-UHFFFAOYSA-N	CCC(C)(O)CCCCCC1OC(=O)C=C1	59	50	72	49	47	41	56	36	24	27	33	51	23	55	1760	675	52	45	96	44	72	61	61	66	40	42	44	63	75	115	66	34	53	7	56	58	442	463	62
1111	Positive	1.199	244.20679	no MS2: Phencyclidine	[M+H]+	244.20598	C17H25N	Aralkylamines	JTJMJGYZQZDUJJ-UHFFFAOYSA-N	C1CCC(CC1)(C2=CC=CC=C2)N3CCCCC3	178	240	334	257	197	136	198	231	260	193	182	168	143	156	13	17	13	36	88	23	0	72	79	221	161	105	60	224	172	149	9	60	137	54	24	73	0	10	46
1112	Positive	7.356	244.21103	low score: Phencyclidine	[M+H]+	244.20598	C17H25N	Aralkylamines	JTJMJGYZQZDUJJ-UHFFFAOYSA-N	C1CCC(CC1)(C2=CC=CC=C2)N3CCCCC3	2151	2096	1746	1765	1965	1691	2091	2389	1990	1889	2193	2034	1918	2022	71	54	361	373	530	434	471	609	496	460	2858	2717	1411	1449	2341	1985	854	304	86	445	455	524	32	30	370
1113	Positive	0.427	244.84628	Unknown	[M+H]+	null	null	null	null	null	0	0	0	0	6	6	7	0	0	6	0	0	6	0	5	39	495	705	1717	2004	2073	2288	1538	1470	0	8	0	6	0	0	64	382	1713	1279	2161	1470	133	68	751
1114	Positive	0.436	244.86812	Unknown	[M+H]+	null	null	null	null	null	0	0	0	0	0	0	8	7	0	6	7	0	6	0	72	4481	206	305	329	247	276	255	274	360	0	0	0	0	11	6	78	223	385	290	278	284	6787	3727	227
1115	Positive	0.702	244.90845	Unknown	[M+H]+	null	null	null	null	null	19	8	7	9	11	16	10	6	6	6	13	0	12	10	456	372	1391	1402	1048	1094	1018	1358	1065	1223	2	11	5	12	5	10	275	1250	1428	1249	1108	1030	178	317	1488
1116	Positive	0.610	244.90898	Unknown	[M+H]+	null	null	null	null	null	22	0	21	26	11	16	6	0	6	6	7	29	12	5	96	1333	1183	1214	1077	1045	1142	1358	864	1117	23	19	0	12	5	14	277	1048	1427	1346	1151	1017	274	317	1488
1117	Positive	0.862	244.94092	Unknown	[M+H]+	null	null	null	null	null	10	31	24	29	19	24	24	25	14	28	38	25	5	15	115	108	58	57	85	29	25	68	17	61	5	8	30	9	4	12	1311	116	100	70	81	30	93	212	123
1118	Positive	1.021	244.97789	Unknown	[M+H]+	null	null	null	null	null	1489	1655	1683	1702	1420	1478	1718	1496	1971	1950	2345	2025	1927	1882	60	22	0	15	11	16	16	0	10	3	1591	1613	1727	1781	1931	1831	264	55	34	0	28	8	6	0	48
1119	Positive	1.174	245.09119	no MS2: Biotin	[M+H]+	245.09544	C10H16N2O3S	Biotin and derivatives	YBJHBAHKTGYVGT-ZKWXMUAHSA-N	C1[C@H]2[C@@H]([C@@H](S1)CCCCC(=O)O)NC(=O)N2	586	612	286	248	441	208	503	550	693	560	687	699	533	564	192	210	3148	2986	1536	3014	3232	3701	3135	2992	533	470	440	448	492	368	811	2337	2488	2146	2704	2309	373	251	2842
1120	Positive	1.092	245.09734	no MS2: Flurbiprofen (Ansaid)	[M+H]+	245.09723	C15H13FO2	Biphenyls and derivatives	SYTBZMRGLBWNTM-SNVBAGLBSA-N	C1=C(C(=CC(=C1)[C@](C(O)=O)(C)[H])F)C2=CC=CC=C2	749	712	523	493	484	580	567	595	810	693	1000	1055	543	584	139	146	2301	1581	1455	2847	3055	3437	2852	2717	648	513	460	429	609	586	790	2273	1741	1534	2701	1890	182	76	2817
1121	Positive	6.331	245.15231	low score: Thermopsine	[M+Na]+	245.16000	C15H20N2O	Anagyrine-type alkaloids	FQEQMASDZFXSJI-UPJWGTAASA-N	O=C1C=CC=C2N1CC3CC2CN4CCCCC43	159	126	111	121	78	80	140	108	104	108	101	90	120	101	105	121	1846	1884	1141	1208	1267	1089	1137	1107	66	61	136	143	80	100	3179	2066	1472	1512	1161	1064	106	63	1597
1122	Positive	1.153	245.15501	no MS2: Isokobusone_major	[M+Na]+	245.15120	C14H22O2	Cyclic alcohols and derivatives	BSFUDCIRZBAPDS-UHFFFAOYSA-N	C=C1CCC2C(CC2(C)C)C(=O)CCC1O	288	258	390	391	326	252	330	272	372	407	342	312	477	380	1083	65	1060	925	460	1122	493	989	630	1500	297	332	372	424	289	354	440	698	1353	779	1097	858	86	58	1100
1123	Positive	11.798	245.19109	low score: (2E,6E)-3,7,11-trimethyl-2,6,10-dodecatrien-1-ol	[M+Na]+	245.19000	C15H26O	Sesquiterpenoids	CRDAMVZIKSXKFV-YFVJMOTDSA-N	OCC=C(C)CCC=C(C)CCC=C(C)C	59	62	73	81	453	341	77	110	62	91	76	76	162	170	83	147	94	155	73	77	125	91	106	108	639	849	116	1091	124	128	104	98	85	75	55	81	48	48	129
1124	Positive	11.971	245.19191	no MS2: 6-methyl-2-(4-methyl-3-cyclohexen-1-yl)-5-hepten-2-ol	[M+Na]+	245.19000	C15H26O	Sesquiterpenoids	RGZSQWQPBWRIAQ-HUUCEWRRSA-N	OC(C)(CCC=C(C)C)C1CC=C(C)CC1	406	351	384	369	519	507	388	430	362	486	520	417	424	501	76	96	104	110	99	117	63	110	146	115	387	371	1225	375	464	457	75	127	84	112	99	65	114	76	128
1125	Positive	16.376	245.21028	low score: Xylometazoline	[M+H]+	245.20122	C16H24N2	Phenylpropanes	HUCJFAOMUPXHDK-UHFFFAOYSA-N	CC1=CC(=CC(=C1CC2=NCCN2)C)C(C)(C)C	134	136	140	102	1095	1169	92	96	111	81	103	142	338	335	53	0	215	245	235	220	189	289	219	317	873	754	266	315	338	301	113	211	180	144	317	230	54	66	245
1126	Positive	11.682	245.22276	Unknown	[M+H]+	null	null	null	null	null	52	63	97	72	32	72	81	48	53	90	77	80	39	60	81	2650	111	113	131	184	152	151	167	153	83	67	61	86	73	90	166	111	152	180	149	118	97	523	149
1127	Positive	12.650	245.22382	low score: N1-Acetylspermine	[M+H-2H2O]+	245.23358	C12H28N4O	Acetamides	GUNURVWAJRRUAV-UHFFFAOYSA-N	NCCCNCCCCNCCCNC(C)=O	70	68	59	81	73	49	41	54	59	43	50	43	60	29	50	1748	182	134	269	209	129	76	117	212	51	84	59	57	73	66	52	97	143	167	64	150	126	40	68
1128	Positive	12.004	245.22595	low score: N1-Acetylspermine	[M+H-H2O]+	245.23358	C12H28N4O	Acetamides	GUNURVWAJRRUAV-UHFFFAOYSA-N	NCCCNCCCCNCCCNC(C)=O	68	89	48	69	69	104	90	63	63	87	81	66	63	14	2078	84	80	135	80	109	105	123	131	77	89	56	42	77	49	60	102	88	156	119	70	139	62	112	77
1129	Positive	11.872	245.24068	low score: N1-Acetylspermine	[M+H]+	245.23358	C12H28N4O	Acetamides	GUNURVWAJRRUAV-UHFFFAOYSA-N	NCCCNCCCCNCCCNC(C)=O	76	37	93	62	36	80	73	54	42	27	39	36	64	33	47	12	318	262	585	553	286	310	438	359	56	69	66	36	63	42	1671	285	415	402	248	261	40	19	345
1130	Positive	11.655	245.24254	low score: N1-Acetylspermine	[M+H]+	245.23358	C12H28N4O	Acetamides	GUNURVWAJRRUAV-UHFFFAOYSA-N	NCCCNCCCCNCCCNC(C)=O	45	35	51	42	43	54	52	50	44	23	24	42	36	36	0	318	2249	2270	5074	4968	2223	2376	3087	3765	52	65	61	23	55	30	169	1780	3519	3765	1687	1926	38	52	2904
1131	Positive	12.585	245.24294	low score: N1-Acetylspermine	[M+H]+	245.23358	C12H28N4O	Acetamides	GUNURVWAJRRUAV-UHFFFAOYSA-N	NCCCNCCCCNCCCNC(C)=O	158	48	144	117	115	83	170	203	154	119	61	45	76	84	37	299	2723	3907	8025	7910	3794	4267	6248	8936	76	23	962	62	62	70	66	2091	5048	5074	2603	2794	23	0	5304
1132	Positive	12.733	245.24460	Unknown	[M+H]+	null	null	null	null	null	37	38	34	53	54	9	31	69	47	45	37	26	20	46	45	282	587	465	1900	1634	783	899	1274	1594	28	62	18	24	29	39	1887	333	1093	1124	429	560	24	0	1224
1133	Positive	12.376	245.24911	low score: N1-Acetylspermine	[M+H]+	245.23358	C12H28N4O	Acetamides	GUNURVWAJRRUAV-UHFFFAOYSA-N	NCCCNCCCCNCCCNC(C)=O	2583	2893	2612	2963	2128	2582	4050	4268	2202	2332	907	1035	1323	1585	0	0	47	36	121	117	65	59	125	74	1658	1422	12	946	1480	1573	48	32	91	64	75	102	0	0	20
1134	Positive	0.685	245.82132	Unknown	[M+H]+	null	null	null	null	null	0	0	0	5	5	6	0	0	0	11	5	0	0	5	5	0	2120	1786	1586	1694	1751	1831	1894	2120	0	10	0	0	0	0	344	2332	1608	1573	1857	1674	0	6	1655
1135	Positive	0.528	245.82256	Unknown	[M+H]+	null	null	null	null	null	0	0	6	6	0	6	0	0	0	0	0	8	0	0	0	9	1917	1839	1689	1620	1864	1764	1957	2116	6	14	0	0	0	11	262	1884	1702	1758	1709	1844	7	14	1891
1136	Positive	0.938	246.08902	low score: debromohymenialdisine	[M+H]+	246.09856	C11H11N5O2	Pyrroloazepines	GOMOZCHDZAPKRI-UHFFFAOYSA-N	N=C1N=C(C(N1)=O)C(C2=C3NC=C2)CCNC3=O	10	42	53	38	9	71	37	11	31	48	49	67	56	11	2853	95	107	90	38	84	78	128	51	45	9	12	0	50	48	104	237	32	55	101	32	14	77	137	76
1137	Positive	1.296	246.08983	no MS2: Salsolidine	[M+K]+	246.08908	C12H17NO2	Tetrahydroisoquinolines	HMYJLVDKPJHJCF-UHFFFAOYSA-N	O(C=1C=C2C(=CC1OC)C(NCC2)C)C	14	19	16	12	77	47	10	28	31	23	21	20	40	59	76	1428	72	76	89	49	172	286	53	290	33	25	46	72	75	50	43	242	131	336	55	311	170	127	64
1138	Positive	0.979	246.11021	no MS2: FEN_246.1101_16.1	[M+H]+	246.11003	C12H14F3NO	Amphetamines and derivatives	ZVKARXLKNIBGIR-UHFFFAOYSA-N	CC(CC1=CC(=CC=C1)C(F)(F)F)NC(C)=O	138	265	194	156	154	300	184	115	219	139	195	172	267	186	138	86	121	223	192	35	87	209	88	128	163	323	13	249	110	251	1983	75	87	118	84	82	86	63	68
1139	Positive	1.227	246.16959	no MS2: NCGC00179796-02!5-[(E)-3-hydroxy-3-methylbut-1-enyl]-2-methylcyclohex-5-ene-1,2,4-triol [IIN-based: Match]	[M+NH4]+	246.16998	C12H20O4	Cyclitols and derivatives	KLZSJMCXTDLPSF-SNAWJCMRSA-N	CC(C)(O)\\C=C\\C1=CC(O)C(C)(O)CC1O	89	72	66	90	55	125	65	53	82	106	114	85	88	108	17	2257	127	147	254	247	202	148	152	297	74	125	132	68	87	63	212	145	274	162	156	197	564	498	221
1140	Positive	6.126	246.17001	low score: Pinacidil	[M+H]+	246.17133	C13H19N5	Pyridines and derivatives	IVVNZDGDKPTYHK-UHFFFAOYSA-N	N#CN=C(N=C1C=CNC=C1)NC(C)C(C)(C)C	19	46	41	32	48	37	64	50	49	21	43	23	70	54	13302	112	62	34	62	17	24	65	36	16	35	47	30	54	36	25	330	37	30	14	62	23	45	58	13
1141	Positive	1.189	246.18500	low score: (4S,5Z,6S)-4-(2-methoxy-2-oxoethyl)-5-[2-[(E)-3-phenylprop-2-enoyl]oxyethylidene]-6-[(2S,3R,4S,5S,6R)-3,4,5-trihydroxy-6-(hydroxymethyl)oxan-2-yl]oxy-4H-pyran-3-carboxylic acid	[M+Na]+	246.18283	C14H25NO	N-acyl amines	MAGQQZHFHJDIRE-BNFZFUHLSA-N	OC(=NCC(C)C)C=CC=CCCCCC	1698	1721	2982	3535	3042	3556	1255	1221	1670	1701	2027	2084	2417	2254	15	756	1099	1287	2647	2638	1217	1387	1657	2267	2153	2332	2568	1822	1897	1765	83	4070	3326	3204	1882	1613	543	322	1843
1142	Positive	6.078	246.18703	low score: (4S,5Z,6S)-4-(2-methoxy-2-oxoethyl)-5-[2-[(E)-3-phenylprop-2-enoyl]oxyethylidene]-6-[(2S,3R,4S,5S,6R)-3,4,5-trihydroxy-6-(hydroxymethyl)oxan-2-yl]oxy-4H-pyran-3-carboxylic acid	[M+Na]+	246.18283	C14H25NO	N-acyl amines	MAGQQZHFHJDIRE-BNFZFUHLSA-N	OC(=NCC(C)C)C=CC=CCCCCC	86	81	174	89	104	136	53	40	62	43	51	53	181	98	796	42	47	100	64	24	53	75	34	43	102	100	124	109	112	107	14002	18	42	41	87	46	48	20	27
1143	Positive	1.227	246.24265	Unknown	[M+H]+	null	null	null	null	null	70	51	147	149	58	66	79	46	69	68	26	72	81	84	5	1281	98	66	10	49	20	72	17	42	19	62	75	72	44	86	65	28	60	63	128	86	267	151	73
1144	Positive	7.086	246.24323	Unknown	[M+H]+	null	null	null	null	null	88	103	53	91	101	84	68	76	115	109	105	76	12	28	14972	189	34	40	43	36	46	14	13	19	58	79	31	30	42	46	405	46	32	20	20	20	276	252	4
1145	Positive	1.400	246.25955	Unknown	[M+H]+	null	null	null	null	null	143	253	139	183	165	146	267	161	88	63	83	114	110	118	0	0	16	10	0	0	14	6	23	27	116	102	2633	122	147	151	0	0	9	3	14	0	0	5	5
1146	Positive	7.058	246.25983	Unknown	[M+H]+	null	null	null	null	null	97	55	52	73	40	60	62	70	71	36	43	33	54	46	1058	6	90	113	152	81	88	127	150	146	20	37	173	32	41	60	8663	87	183	146	193	59	23	6	170
1147	Positive	6.525	246.26195	Unknown	[M+H]+	null	null	null	null	null	22	16	20	23	44	9	41	26	23	16	5	14	5	5	0	0	8	14	7	0	0	0	10	0	9	13	1504	21	12	26	0	0	10	14	15	6	0	0	20
1148	Positive	1.228	246.26570	Unknown	[M+H]+	null	null	null	null	null	4380	4836	3922	4388	3656	3348	4591	4696	2817	2506	2168	2494	2715	2671	0	11	868	1119	777	1401	665	1144	569	1112	2606	2560	342	3407	2829	3310	0	516	930	1384	412	782	5	0	1538
1149	Positive	0.436	246.86122	Unknown	[M+H]+	null	null	null	null	null	0	0	0	0	0	0	6	6	0	0	0	0	0	0	426	35716	177	225	214	298	314	306	358	288	11	0	6	0	0	0	21	177	229	304	318	391	51922	29189	283
1150	Positive	0.431	246.88097	Unknown	[M+H]+	null	null	null	null	null	0	8	6	0	0	7	0	0	0	7	0	8	0	0	50	1325	643	544	2382	2264	2465	2627	2413	3215	0	0	0	0	7	0	89	1603	1207	1335	2630	3010	1895	1182	730
1151	Positive	0.657	246.90500	Unknown	[M+H]+	null	null	null	null	null	5	5	7	18	6	11	6	5	9	17	10	5	5	6	31	134	1129	1254	940	1023	892	1034	853	904	0	0	6	11	11	10	242	1055	1254	1008	902	1095	117	148	1174
1152	Positive	0.547	246.90593	Unknown	[M+H]+	null	null	null	null	null	8	8	13	12	6	10	6	9	9	10	10	5	5	0	39	404	990	1060	910	974	919	794	821	904	22	6	6	11	11	0	189	1010	1044	1022	648	714	284	187	1164
1153	Positive	1.113	247.03780	no MS2: Fonofos	[M+2Na-H]+	247.03748	C10H15OPS2	Benzene and substituted derivatives	KVGLBTYUCJYMND-UHFFFAOYSA-N	S=P(Sc1ccccc1)(OCC)CC	320	234	219	322	262	228	128	95	143	112	176	95	566	751	90	23	834	641	206	350	887	1039	749	631	946	940	431	732	308	383	740	1669	1264	1119	1588	1086	45	15	410
1154	Positive	6.605	247.10764	N-Acetyltryptophan	[M+H]+	247.10771	C13H14N2O3	N-acyl-alpha amino acids	DZTHIGRZJZPRDV-GFCCVEGCSA-N	O=C(O)C(N=C(O)C)CC1=CNC=2C=CC=CC21	21	12	14	22	18	0	19	21	24	10	17	40	15	21	1428	129	54	39	32	43	52	48	37	41	4	14	16	23	16	20	86	72	65	42	16	35	42	24	52
1155	Positive	1.120	247.12988	no MS2: desmotroposantonin	[M+H]+	247.13000	C15H18O3	Naphthofurans	ZLKGXNSQDUJSAU-PSEJXSGSSA-N	O=C1OC2C=3C(=C(O)C=C(C3CCC2C1C)C)C	172	239	261	269	245	289	338	192	189	185	234	348	191	230	1278	100	1204	801	1075	841	1220	1844	1254	673	383	403	245	196	320	245	143	1297	1107	1072	1226	1297	91	66	1452
1156	Positive	1.166	247.14685	no MS2: Tryptophan betaine; CE0; AOHCBEAZXHZMOR-ZDUSSCGKSA-N	[M+H]+	247.14412	C14H18N2O2	L-alpha-amino acids	AOHCBEAZXHZMOR-ZDUSSCGKSA-N	C[N+](C)(C)[C@@H](Cc1c[nH]c2ccccc12)C(=O)[O-]	99	154	160	122	244	140	201	114	142	107	104	150	187	233	51	60	1098	912	997	819	1020	1151	1242	1090	129	133	298	147	91	146	2219	1349	1099	777	1185	1106	41	1	905
1157	Positive	1.394	247.18237	low score: sophocarpine	[M+H]+	247.17999	C15H22N2O	Matrine alkaloids	AAGFPTSOPGCENQ-KYEXWDHISA-N	O=C1C=CCC2N1CC3CCCN4CCCC2C43	101	59	92	67	91	75	83	88	99	95	92	74	79	82	20	66	25206	25702	23597	22356	25948	26891	25362	23903	81	88	79	87	66	109	602	26517	25498	25872	24183	24629	50	14	26148
1158	Positive	1.232	247.18346	low score: Sophocarpine	[M+H]+	247.18050	C15H22N2O	Matrine alkaloids	AAGFPTSOPGCENQ-JLNYLFASSA-N	C1C[C@H]2CN3[C@H](CC=CC3=O)[C@@H]4[C@H]2N(C1)CCC4	105	90	241	182	234	249	90	97	108	161	112	136	237	270	15	218	39178	37473	26788	30554	40293	40139	37146	40594	184	163	376	213	186	145	1082	35842	36246	35755	41002	40151	57	41	40407
1159	Positive	13.424	247.18359	no MS2: Milnacipran	[M+H]+	247.18050	C15H22N2O	Phenylacetamides	GJJFMKBJSRMPLA-HIFRSBDPSA-N	O=C(N(CC)CC)C1(C=2C=CC=CC2)CC1CN	86	95	66	59	88	76	61	55	112	87	107	88	51	61	133	149	20942	22334	19960	23286	22620	22084	22681	22960	44	88	83	81	116	46	22918	22029	21857	21970	22698	23936	30	64	17485
1160	Positive	13.723	247.18422	no MS2: Milnacipran	[M+H]+	247.18050	C15H22N2O	Phenylacetamides	GJJFMKBJSRMPLA-HIFRSBDPSA-N	O=C(N(CC)CC)C1(C=2C=CC=CC2)CC1CN	57	65	102	67	96	85	118	73	91	86	80	101	70	112	56	48	20468	19385	19406	19191	20131	23389	22305	22009	46	74	68	66	83	64	24533	19932	21796	19091	21451	18691	102	19	17587
1161	Positive	14.168	247.18427	low score: Sophocarpine	[M+H]+	247.18050	C15H22N2O	Matrine alkaloids	AAGFPTSOPGCENQ-JLNYLFASSA-N	C1C[C@H]2CN3[C@H](CC=CC3=O)[C@@H]4[C@H]2N(C1)CCC4	76	74	101	61	131	133	48	92	67	96	69	83	49	110	0	157	16479	15093	14715	15706	15276	15916	15036	14577	108	93	73	75	46	56	21078	17017	15246	15258	17426	14928	13	75	12853
1162	Positive	5.886	247.18452	low score: Sophocarpine	[M+H]+	247.18050	C15H22N2O	Matrine alkaloids	AAGFPTSOPGCENQ-JLNYLFASSA-N	C1C[C@H]2CN3[C@H](CC=CC3=O)[C@@H]4[C@H]2N(C1)CCC4	46	43	36	35	52	57	70	57	58	48	62	78	80	63	21	30	3133	3308	4079	3360	3743	3652	3958	3549	69	58	64	91	70	92	2500	2934	3639	3513	3704	3591	39	21	3127
1163	Positive	13.590	247.18480	no MS2: Milnacipran	[M+H]+	247.18050	C15H22N2O	Phenylacetamides	GJJFMKBJSRMPLA-HIFRSBDPSA-N	O=C(N(CC)CC)C1(C=2C=CC=CC2)CC1CN	61	92	116	139	96	78	90	73	60	150	106	68	76	112	56	27	21321	20724	18767	20336	20386	23172	22305	22009	101	64	62	62	118	63	23820	21946	22001	19816	22550	20645	30	19	17571
1164	Positive	9.433	247.18489	low score: Sophocarpine	[M+H]+	247.18050	C15H22N2O	Matrine alkaloids	AAGFPTSOPGCENQ-JLNYLFASSA-N	C1C[C@H]2CN3[C@H](CC=CC3=O)[C@@H]4[C@H]2N(C1)CCC4	111	9	121	98	127	121	162	7	59	122	37	80	78	95	65	12	11719	10492	9755	11002	12464	12516	11729	11225	191	112	101	68	152	4	11573	12570	11657	11489	11139	11274	58	67	11350
1165	Positive	0.416	247.18518	low score: sophocarpine	[M+H]+	247.17999	C15H22N2O	Matrine alkaloids	AAGFPTSOPGCENQ-KYEXWDHISA-N	O=C1C=CCC2N1CC3CCCN4CCCC2C43	40	50	93	49	38	98	80	96	43	38	55	77	46	64	18	7	96132	109571	92145	141818	124154	144163	182964	180956	86	47	31	46	52	41	606	86591	133017	140142	166081	135989	14	22	109065
1166	Positive	13.873	247.18524	no MS2: Milnacipran	[M+H]+	247.18050	C15H22N2O	Phenylacetamides	GJJFMKBJSRMPLA-HIFRSBDPSA-N	O=C(N(CC)CC)C1(C=2C=CC=CC2)CC1CN	79	65	98	63	94	59	72	100	102	90	80	85	86	61	138	0	19786	18580	17210	18147	18907	20192	17946	19246	82	96	53	60	67	86	22215	19925	18703	18887	19658	19131	102	16	15620
1167	Positive	8.724	247.18530	low score: sophocarpine	[M+H]+	247.17999	C15H22N2O	Matrine alkaloids	AAGFPTSOPGCENQ-KYEXWDHISA-N	O=C1C=CCC2N1CC3CCCN4CCCC2C43	98	98	50	50	83	156	88	56	154	198	153	11	57	9	28	184	9974	10149	7827	9063	10216	10416	9932	9454	157	37	81	162	62	50	9797	9657	9784	9951	9539	9152	37	52	9581
1168	Positive	14.304	247.18530	low score: Sophocarpine	[M+H]+	247.18050	C15H22N2O	Matrine alkaloids	AAGFPTSOPGCENQ-JLNYLFASSA-N	C1C[C@H]2CN3[C@H](CC=CC3=O)[C@@H]4[C@H]2N(C1)CCC4	73	73	49	134	93	90	71	42	89	74	31	83	56	116	0	74	17953	17349	14948	13836	15581	15024	15036	13892	88	74	66	88	67	49	18825	17497	15391	16294	14116	13687	31	32	14103
1169	Positive	9.246	247.18616	low score: Sophocarpine	[M+H]+	247.18050	C15H22N2O	Matrine alkaloids	AAGFPTSOPGCENQ-JLNYLFASSA-N	C1C[C@H]2CN3[C@H](CC=CC3=O)[C@@H]4[C@H]2N(C1)CCC4	113	53	0	37	65	4	50	50	6	131	125	148	6	2	64	46	11525	11082	10556	11031	11619	12223	12201	11568	142	6	99	50	45	108	10760	11139	11457	11221	12208	11734	44	60	12025
1170	Positive	8.822	247.18658	low score: Sophocarpine	[M+H]+	247.18050	C15H22N2O	Matrine alkaloids	AAGFPTSOPGCENQ-JLNYLFASSA-N	C1C[C@H]2CN3[C@H](CC=CC3=O)[C@@H]4[C@H]2N(C1)CCC4	118	135	50	104	63	161	101	213	88	205	151	148	57	118	20	184	10025	9598	10029	9988	10743	10344	9985	9743	0	140	88	162	149	50	9807	9962	10796	9706	9761	9497	38	47	9628
1171	Positive	1.112	247.21971	Unknown	[M+H]+	null	null	null	null	null	479	483	505	512	362	267	278	294	215	242	270	308	1393	1466	188	84	2360	2384	1370	1737	2261	2467	2426	2695	655	837	593	964	601	614	341	4026	2998	2694	1709	1613	10	5	453
1172	Positive	13.794	247.26288	Unknown	[M+H]+	null	null	null	null	null	301	309	381	416	355	314	489	493	392	414	184	286	189	201	0	0	1490	1647	6003	5821	2970	3538	5606	5969	300	224	65	225	294	225	1959	2045	3666	3991	2097	2417	0	73	2592
1173	Positive	0.513	247.81558	Unknown	[M+H]+	null	null	null	null	null	0	0	0	10	0	0	0	0	0	9	0	0	0	0	5	6	1556	1502	1111	1155	1242	1073	1326	1529	6	6	0	0	0	5	177	1694	1049	1250	1018	1320	6	6	1489
1174	Positive	0.461	247.84187	Unknown	[M+H]+	null	null	null	null	null	6	0	0	0	0	0	0	0	0	0	0	0	0	0	0	13	781	1216	614	646	580	644	799	841	0	0	7	0	6	6	96	1175	574	901	747	594	20	26	1053
1175	Positive	0.427	247.88451	Unknown	[M+H]+	null	null	null	null	null	0	0	0	6	0	0	9	7	8	0	0	0	0	0	33	124	112	577	1478	1470	1624	1472	1432	1148	0	0	5	0	0	0	72	634	996	712	1533	1557	786	854	454
1176	Positive	0.443	247.93750	Unknown	[M+H]+	null	null	null	null	null	8	7	0	0	8	0	8	0	8	0	10	16	0	6	470	22	966	1175	1165	1558	1540	1435	2255	1531	12	0	11	6	0	22	52	485	1844	1803	1659	1416	229	1690	1382
1177	Positive	0.663	247.94409	Unknown	[M+H]+	null	null	null	null	null	0	6	16	6	5	12	10	5	5	10	17	0	11	5	508	92	310	396	366	238	254	139	174	168	1	14	10	13	0	1	61	193	216	208	238	231	1628	2398	350
1178	Positive	0.736	248.05322	no MS2: Emtricitabine	[M+H]+	248.04997	C8H10FN3O3S	3'-thia pyrimidine nucleosides	XQSPYNMVSIKCOC-NTSWFWBYSA-N	FC=1\C(=N/C(=O)N(C=1)[C@H]2O[C@H](SC2)CO)\N	10	0	2	8	0	5	5	5	10	15	5	5	8	9	183	24	1100	724	434	587	589	583	434	522	7	0	6	5	10	10	114	564	639	609	527	480	22	54	836
1179	Positive	1.120	248.14906	no MS2: NCGC00169946-02!2-(1,2-dihydroxypentyl)-4-methoxy-2,3-dihydropyran-6-one [IIN-based: Match]	[M+NH4]+	248.14925	C11H18O5	Dihydropyranones	YLHOHANRUSKHKO-UHFFFAOYSA-N	CCCC(O)C(O)C1CC(OC)=CC(=O)O1	50	40	27	9	42	97	30	83	50	66	57	52	132	71	4263	278	133	209	121	116	33	32	117	44	74	51	120	77	54	81	418	18	29	42	19	26	25	133	106
1180	Positive	1.160	248.18536	no MS2: Methoxetamine	[M+H]+	248.16451	C15H21NO2	Anisoles	LPKTWLVEGBNOOX-UHFFFAOYSA-N	CCNC1(CCCCC1=O)C2=CC(=CC=C2)OC	237	340	281	251	349	1220	1113	288	202	218	183	240	118	1025	18	26	5914	4786	2637	4211	6307	6022	6031	6030	1203	1189	2249	1026	120	149	4175	3385	5513	5831	6100	6194	0	7	6060
1181	Positive	6.263	248.22203	Unknown	[M+H]+	null	null	null	null	null	24	58	42	35	27	25	32	52	38	62	17	34	44	27	1670	58	157	140	84	61	62	127	149	82	50	40	59	48	63	36	170	150	141	75	76	128	20	53	139
1182	Positive	6.218	248.24103	Unknown	[M+H]+	null	null	null	null	null	84	53	93	78	99	62	39	51	95	77	75	81	112	102	58	24	85	52	51	53	34	50	61	53	93	64	94	62	100	80	1821	80	84	51	51	72	22	23	69
1183	Positive	0.428	248.86462	Unknown	[M+H]+	null	null	null	null	null	0	0	0	0	0	6	0	0	0	0	6	0	6	0	51	4268	283	637	462	517	797	1062	924	918	0	0	0	6	7	6	92	618	297	430	962	661	7640	7094	657
1184	Positive	0.426	248.88084	Unknown	[M+H]+	null	null	null	null	null	0	0	0	7	10	8	7	0	6	0	0	7	0	0	17	410	918	1206	4258	5382	6050	6168	5158	5540	0	0	6	0	6	0	195	2786	3010	3476	5840	6071	674	617	1813
1185	Positive	0.909	249.01588	no MS2: Linuron	[M+H]+	249.01921	C9H10Cl2N2O2	N-phenylureas	XKJMBINCVNINCA-UHFFFAOYSA-N	CON(C)C(=O)Nc1ccc(Cl)c(Cl)c1	12	14	14	5	22	118	8	45	47	62	43	58	33	34	22	22	214	52	65	105	87	87	191	148	37	31	13	19	59	74	1194	228	189	168	151	131	11	36	185
1186	Positive	1.299	249.04259	low score: 4-methoxy-9H-xanthen-9-one	[M+Na]+	249.05000	C14H10O3	Xanthones	SYEHHMRXODULBY-UHFFFAOYSA-N	O=C1C=2C=CC=CC2OC=3C(OC)=CC=CC13	10	16	1	13	5	20	6	5	11	6	11	32	24	21	28	2366	3073	2862	1158	648	2600	2462	2365	2093	12	9	5	18	22	9	314	2948	2340	2386	1932	2224	4807	5748	2277
1187	Positive	1.180	249.06198	low score: Genipin	[M+Na]+	249.07001	C11H14O5	Iridoids and derivatives	AZKVWQKMDGGDSV-BCMRRPTOSA-N	O=C(OC)C1=COC(O)C2C(=CCC12)CO	300	203	336	391	296	236	269	159	278	266	456	367	401	294	46	5987	2615	2391	2696	2309	2594	2304	2184	2486	365	338	224	250	368	229	69	2751	2400	2530	2202	2033	4687	4583	3038
1188	Positive	1.129	249.07767	low score: Harmine hydrochloride	[M+Na]+	249.08000	C13H13ClN2O	Harmala alkaloids	VNPLYCKZIUTKJM-UHFFFAOYSA-N	Cl.N=1C=CC=2C=3C=CC(OC)=CC3NC2C1C	3108	3349	4833	5122	3408	3360	3234	3298	3632	3751	3499	3714	3746	3735	39	578	9097	10454	9982	8606	9118	9288	9552	10536	4194	3942	3393	3711	3928	4043	93	8733	10641	9703	5740	6459	381	295	12402
1189	Positive	0.956	249.12297	no MS2: Unknown (carbon number 14); PlaSMA ID-1046	[M+H]+	249.11301	C14H16O4	Unknown	null	null	39	56	27	64	42	92	77	47	24	45	44	61	28	65	142	20	81	38	62	32	97	51	93	164	46	33	6	53	93	49	1007	80	17	93	60	121	56	24	115
1190	Positive	1.229	249.12720	no MS2: NCGC00160286-01!7-Prenyl-theophylline	[M+H]+	249.13460	C12H16N4O2	Xanthines	JHQSOHPXNWCALX-UHFFFAOYSA-N	CN1C2=C(N(C\C=C(\C)C)C=N2)C(=O)N(C)C1=O	248	188	217	227	258	198	176	242	155	204	211	180	199	244	85	136	653	335	761	740	583	331	628	326	276	233	115	207	249	178	113	843	853	1225	837	1070	38	56	258
1191	Positive	7.545	249.14671	low score: Pterosin A	[M+H]+	249.14851	C15H20O3	Indanones	BDZJLPDYMKPKGC-HNNXBMFYSA-N	CC1=CC2=C(C(=C1CCO)C)C(=O)[C@](C2)(C)CO	75	78	67	84	90	63	71	79	40	93	91	67	94	125	2100	213	81	156	50	114	143	78	132	152	91	77	114	104	94	135	147	105	156	127	110	101	250	232	163
1192	Positive	7.521	249.16682	low score: (3S,6S)-3,6-di-sec-butylpiperazine-2,5-dione	[M+Na]+	249.16000	C12H22N2O2	Alpha amino acids and derivatives	ZRLVJNQOEORYIS-QLEHZGMVSA-N	O=C1NC(C(=O)NC1C(C)CC)C(C)CC	131	123	137	158	131	178	149	140	141	136	139	150	122	114	208	124	286	197	219	274	189	267	277	266	238	224	155	137	123	135	2764	253	318	218	234	176	108	116	163
1193	Positive	0.933	249.17410	no MS2: 1COOH-2But-A7EO2	[M+H]+	249.16965	C12H24O5	Medium-chain fatty acids	ZYGYNVJVDLQWDG-UHFFFAOYSA-N	O=C(O)CC(CCCC)COCCOCCO	115	33	114	24	29	298	38	176	115	174	80	133	127	142	249	75	156	253	142	72	266	88	76	114	124	303	46	220	66	65	1262	406	151	88	278	216	65	67	194
1194	Positive	1.398	249.20050	low score: Matrine	[M+H]+	249.19614	C15H24N2O	Matrine alkaloids	ZSBXGIUJOOQZMP-JLNYLFASSA-N	O=C1CCC[C@@H]2[C@H]3CCCN4CCC[C@@H](CN12)[C@@H]34	532	553	437	471	496	443	529	465	499	556	423	485	484	573	88	125	1059	1378	1154	1234	1366	1357	1364	1414	464	474	714	454	574	571	967	1143	1376	1029	1376	1648	114	91	1226
1195	Positive	1.724	249.20250	no MS2: Matrine; PlaSMA ID-1050	[M+H]+	249.19614	C15H24N2O	Alkaloids	ZSBXGIUJOOQZMP-UHFFFAOYNA-N	O=C1CCCC2C3CCCN4CCCC(CN12)C34	652	623	638	699	580	682	758	690	461	659	642	727	743	652	51	95	1402	1399	1386	1219	1416	1311	1407	1551	609	537	590	575	659	676	937	1308	1435	1206	1467	1521	86	32	1326
1196	Positive	14.421	249.26149	Unknown	[M+H]+	null	null	null	null	null	0	10	24	0	14	7	3	23	10	16	20	7	19	15	0	1208	64	180	690	83	58	262	66	62	25	5	12	11	21	14	609	51	20	58	117	85	723	238	32
1197	Positive	14.302	249.27484	Unknown	[M+H]+	null	null	null	null	null	0	12	7	14	14	17	0	14	10	9	3	7	23	3	0	0	5980	5812	3419	3426	1813	2197	2027	1829	7	15	8	6	15	14	5824	6102	3636	3565	1952	1482	59	16	2511
1198	Positive	14.380	249.27844	Unknown	[M+H]+	null	null	null	null	null	0	12	7	10	9	4	7	4	12	9	0	7	14	6	36	40	6067	5970	3419	3450	1806	2177	2068	1882	7	9	8	6	14	14	5964	6278	3595	3650	1954	553	13	0	256
1199	Positive	0.473	249.94072	Unknown	[M+H]+	null	null	null	null	null	25	20	12	16	8	20	12	18	31	10	38	52	14	7	170	98	501	327	213	235	412	251	282	248	16	28	6	21	24	30	53	136	304	264	382	320	825	1202	461
1200	Positive	0.602	249.94328	Unknown	[M+H]+	null	null	null	null	null	16	10	12	9	0	4	8	10	6	10	1	0	19	5	125	782	83	92	109	92	81	71	85	86	13	6	15	1	5	5	77	161	113	84	68	78	1096	993	155
1201	Positive	0.435	249.96127	Unknown	[M+H]+	null	null	null	null	null	0	18	9	0	0	7	8	6	0	6	0	0	18	9	33	43	295	576	1396	1492	1288	1428	1558	1114	0	0	6	6	10	7	111	351	1754	1591	1341	1042	65	74	1105
1202	Positive	12.717	250.08571	low score: Cinchophen	[M+H]+	250.08626	C16H11NO2	Phenylquinolines	YTRMTPPVNRALON-UHFFFAOYSA-N	OC(=O)C1=C2C=CC=CC2=NC(=C1)C1=CC=CC=C1	0	0	0	0	23	12	0	0	17	13	0	7	6	6	1278	1097	20	0	8	21	9	7	20	2	16	7	14	6	6	0	15	13	4	38	25	10	856	68	8
1203	Positive	13.507	250.10617	low score: Goniothalenol	[M+NH4]+	250.10739	C13H12O4	Furopyrans	ZKIRVBNLJKGIEM-UHFFFAOYSA-N	O=C1OC2C(OC(C=3C=CC=CC3)C2O)C=C1	1202	1209	1463	1182	1255	1471	1281	1284	1087	1459	1188	1237	1274	1190	119	89	43	47	24	89	40	27	64	43	1277	1423	1460	1049	1173	1315	65	71	63	87	27	48	72	52	77
1204	Positive	7.775	250.17690	low score: N,O-Desmethyltramadol	[M+H]+	250.18016	C15H23NO2	Cyclohexylphenols	UWJUQVWARXYRCG-HIFRSBDPSA-N	O[C@]2(c1cc(O)ccc1)CCCC[C@@H]2CN(C)C	54	33	97	68	80	67	61	72	89	80	57	71	30	22	2397	323	100	88	98	60	60	56	61	39	67	78	40	69	48	67	101	92	60	41	70	51	456	489	99
1205	Positive	1.299	250.62883	Unknown	[M+H]+	null	null	null	null	null	6	6	0	8	11	0	0	6	0	5	5	0	6	6	0	0	7	0	2206	916	0	0	19	9	11	0	5	0	0	0	0	27	0	13	2	0	5	0	0
1206	Positive	7.087	250.63194	Unknown	[M+H]+	null	null	null	null	null	0	0	12	6	0	7	6	19	0	5	0	0	0	0	0	6	0	8	1534	971	35	19	13	23	0	0	5	0	5	0	16	35	0	12	13	7	0	0	8
1207	Positive	0.405	250.85802	Unknown	[M+H]+	null	null	null	null	null	0	0	0	0	0	6	0	8	0	8	0	0	0	0	19	1578	85	224	126	314	343	424	415	332	0	0	0	7	14	0	20	308	108	305	321	407	2914	3581	304
1208	Positive	0.425	250.88104	Unknown	[M+H]+	null	null	null	null	null	0	0	0	8	0	0	0	0	6	6	0	8	9	6	43	155	2324	2184	6782	8741	8717	8974	6725	6979	0	0	5	6	9	0	100	3287	4606	6230	7595	7152	186	150	3040
1209	Positive	1.128	250.91969	Unknown	[M+H]+	null	null	null	null	null	26	7	40	24	11	6	20	15	21	39	13	18	44	58	17	2046	189	101	152	167	163	327	164	94	47	29	26	32	38	34	19	187	173	267	230	174	1568	1660	127
1210	Positive	1.113	250.93698	Unknown	[M+H]+	null	null	null	null	null	1328	1065	1431	1262	752	1048	692	664	764	1034	663	707	1682	1840	29	126	5937	4915	3506	4155	7479	8492	6797	6732	1644	1701	1138	1412	1230	1279	39	6762	7574	7589	7049	5970	201	133	3747
1211	Positive	1.250	251.12935	no MS2: Caffeoyl putrescin (isomer of 1060); PlaSMA ID-1059	[M+H]+	251.14070	C13H18N2O3	Caffeic acid and derivatives	KTZNZCYTXQYEHT-UHFFFAOYSA-N	O=C(C=CC=1C=CC(O)=C(O)C=1)NCCCCN	99	122	87	74	157	140	120	248	85	85	129	147	294	283	20	426	147	313	561	307	490	414	181	318	126	141	144	194	189	190	18	182	460	357	338	382	120	263	166
1212	Positive	6.669	251.20848	low score: myristic acid	[M+Na]+	251.20000	C14H28O2	Long-chain fatty acids	TUNFSRHWOTWDNC-UHFFFAOYSA-N	O=C(O)CCCCCCCCCCCCC	3241	3136	3277	3128	3161	2716	3272	2901	2983	2978	2961	3033	2570	2789	177	241	6301	6192	5776	5032	5170	5063	4667	4460	3238	3081	3039	2874	2707	2974	4833	5862	5655	4944	5293	4764	242	185	5583
1213	Positive	1.293	251.64836	Unknown	[M+H]+	null	null	null	null	null	5	7	0	0	0	19	10	0	0	0	0	0	5	0	0	5	8	9	219	61	0	6	0	0	0	0	6	0	6	0	0	13	0	26	8	14	5	0	7
1214	Positive	0.440	251.95398	Unknown	[M+H]+	null	null	null	null	null	7	0	0	0	0	6	0	0	0	6	12	0	7	6	44	23	112	331	1073	739	703	916	1121	664	10	0	0	0	12	6	82	442	1264	1117	582	351	56	99	685
1215	Positive	5.986	252.17651	Unknown	[M+H]+	null	null	null	null	null	739	810	689	802	816	838	739	784	845	701	634	735	1150	1299	145	143	725	836	862	903	966	976	943	968	900	829	985	1242	1116	1235	626	645	923	806	1054	885	106	141	835
1216	Positive	1.525	252.64052	Unknown	[M+H]+	null	null	null	null	null	0	0	5	5	0	6	0	5	0	0	9	5	5	0	0	0	0	11	320	75	6	17	0	0	0	0	0	11	0	5	4	0	7	0	0	0	0	6	8
1217	Positive	0.425	252.87613	Unknown	[M+H]+	null	null	null	null	null	0	8	7	10	6	0	0	0	0	0	0	0	0	0	18	90	1361	1272	4427	5500	4958	5361	4130	3698	0	10	0	0	8	6	59	2435	3214	3412	4641	4510	136	194	1957
1218	Positive	0.872	252.89992	Unknown	[M+H]+	null	null	null	null	null	5	11	0	4	0	6	8	8	5	0	4	0	8	6	12	52	874	856	912	817	790	779	767	772	6	0	6	1	0	12	10	1116	1230	1136	882	976	8	63	490
1219	Positive	1.141	252.93298	Unknown	[M+H]+	null	null	null	null	null	574	423	477	536	304	339	243	263	379	343	298	333	682	1042	6	145	2569	3405	1490	1704	4861	3610	3630	2382	741	1182	573	560	621	625	43	4310	4294	3854	2662	2782	51	83	2588
1220	Positive	0.444	253.05057	no MS2: 4-methoxy-7-methyl-5H-furo[3,2-g]chromen-5-one	[M+Na]+	253.05000	C13H10O4	Furanochromones	NZVQLVGOZRELTG-UHFFFAOYSA-N	O=C1C=C(OC=2C=C3OC=CC3=C(OC)C12)C	7	15	0	6	0	0	8	6	6	0	12	6	7	6	246	2104	81	56	6	52	68	50	90	108	9	0	0	0	6	6	43	7	142	94	65	62	2749	2310	76
1221	Positive	8.102	253.14479	low score: Frequentin	[M+H]+	253.14343	C14H20O4	1,3-dicarbonyl compounds	MHZVWXOKIRZLCJ-XZQMCIKJSA-N	CCC/C=C/C=C/[C@@H]1C[C@H]([C@H](C(=O)[C@H]1C=O)O)O	104	15	127	84	233	3	66	86	46	75	48	18	77	118	3557	633	166	86	168	158	185	144	90	139	107	76	63	82	78	102	219	151	130	125	76	116	552	453	204
1222	Positive	6.033	253.14810	low score: Frequentin	[M+H]+	253.14343	C14H20O4	1,3-dicarbonyl compounds	MHZVWXOKIRZLCJ-XZQMCIKJSA-N	CCC/C=C/C=C/[C@@H]1C[C@H]([C@H](C(=O)[C@H]1C=O)O)O	684	799	702	741	782	765	699	717	747	770	755	662	1082	1047	106	114	2107	2074	2290	2462	2436	2333	2278	2036	783	716	840	974	1013	974	2197	2058	2330	2224	2097	2203	84	90	2343
1223	Positive	7.247	253.16011	low score: Estriol	[M-2H2O+H]+	253.15869	C18H24O3	Estrogens and derivatives	PROQIPRRNZUXQM-SBZGPEHISA-N	Oc(c4)cc(C3)c(c4)C(C2)C(C3)C(C1)C(C)(C2)C(O)C(O)1	193	166	181	185	232	149	170	215	227	109	157	144	153	171	169	140	644	674	783	818	869	745	748	857	168	145	213	179	125	166	350	970	1566	1544	487	626	122	106	599
1224	Positive	8.077	253.16016	low score: Estriol	[M-2H2O+H]+	253.15869	C18H24O3	Estrogens and derivatives	PROQIPRRNZUXQM-SBZGPEHISA-N	Oc(c4)cc(C3)c(c4)C(C2)C(C3)C(C1)C(C)(C2)C(O)C(O)1	189	173	225	212	179	162	202	202	121	209	202	146	87	190	306	198	211	190	246	240	256	253	173	252	306	188	283	196	202	194	1887	228	275	255	157	223	121	136	272
1225	Positive	1.223	253.16081	no MS2: h_65_epitrenbolone	[M-H2O+H]+	253.15869	C18H22O2	Estrogens and derivatives	MEHHPFQKXOUFFV-HIEASXQVSA-N	C[C@@]12C(CC[C@H]2O)C3CCC4=CC(CCC4=C3C=C1)=O	275	367	449	367	370	441	362	327	332	278	241	275	304	329	62	62	289	686	380	571	362	325	287	384	286	302	216	207	340	433	45	644	545	461	725	726	48	6	435
1226	Positive	7.878	253.16217	low score: Estriol	[M-2H2O+H]+	253.15869	C18H24O3	Estrogens and derivatives	PROQIPRRNZUXQM-SBZGPEHISA-N	Oc(c4)cc(C3)c(c4)C(C2)C(C3)C(C1)C(C)(C2)C(O)C(O)1	164	137	118	136	157	97	131	124	109	164	165	173	158	198	183	193	217	87	108	214	247	239	147	156	146	175	1701	136	177	203	200	212	175	163	110	149	154	150	254
1227	Positive	7.453	253.16795	low score: Hexazinone	[M+H]+	253.16591	C12H20N4O2	Dialkylarylamines	CAWXEEYDBZRFPE-UHFFFAOYSA-N	n1(C2CCCCC2)c(n(c(N(C)C)nc1=O)C)=O	1950	2089	1983	2239	2108	2164	2612	2938	1868	1757	1429	1536	2287	2538	203	267	359	297	397	346	233	367	380	350	3559	3878	150	1417	2470	2270	416	378	482	512	372	369	230	218	440
1228	Positive	0.774	253.85515	Unknown	[M+H]+	null	null	null	null	null	0	0	6	0	1	5	0	5	4	4	0	7	5	8	0	46	1458	1456	2189	2224	2165	2379	2279	2128	0	0	0	0	4	0	277	1774	1860	1906	2120	2430	64	51	1702
1229	Positive	1.135	254.15331	no MS2: Irgarol	[M+H]+	254.14339	C11H19N5S	Methylthio-s-triazines	HDHLIWCXDDZUFH-UHFFFAOYSA-N	CSC1=NC(NC2CC2)=NC(NC(C)(C)C)=N1	95	141	230	156	458	639	53	46	173	220	494	434	298	304	66	120	16	125	161	226	517	417	307	228	517	386	218	426	334	127	59	1327	266	412	143	203	34	45	331
1230	Positive	0.428	254.15807	no MS2: Anabasamine; PlaSMA ID-1085	[M+ACN+H]+	254.16518	C16H19N3	Alkaloids	TZRDBHMKTWECOV-UHFFFAOYNA-N	CN1CCCCC1C1=CN=C(C=C1)C1=CN=CC=C1	73	84	47	62	40	72	64	29	26	72	56	45	72	66	13	13	1063	1189	402	1208	1497	1845	1923	2096	55	54	66	58	70	45	71	1233	1297	1509	1957	1072	15	20	1427
1231	Positive	7.806	254.26405	Unknown	[M+H]+	null	null	null	null	null	517	80	34	76	56	95	87	629	51	40	131	28	307	55	10	0	3422	3036	3402	2817	3025	2997	2993	2961	32	45	43	118	45	42	3476	2867	3020	3003	2840	3332	14	5	2991
1232	Positive	1.224	254.26503	Unknown	[M+H]+	null	null	null	null	null	23	13	19	1	22	28	6	0	14	13	15	5	0	10	5	0	1131	682	375	434	756	906	676	409	11	24	5	20	27	20	2	711	722	745	691	666	5	7	482
1233	Positive	0.174	254.26555	Unknown	[M+H]+	null	null	null	null	null	72	49	79	86	22	50	33	46	45	60	42	47	81	75	10	0	1546	1618	1432	1483	1676	1755	1459	1570	57	121	46	40	111	53	60	1972	1812	1363	1748	1859	50	8	1606
1234	Positive	14.437	254.26566	Unknown	[M+H]+	null	null	null	null	null	25	46	55	62	88	44	69	62	50	46	63	68	57	59	28	33	3909	4301	4144	3622	3746	4075	3887	3580	48	33	71	19	14	72	4150	3521	4268	3792	3999	3784	0	32	3797
1235	Positive	0.324	254.26715	Unknown	[M+H]+	null	null	null	null	null	32	55	81	70	77	60	112	47	44	64	38	52	60	49	8	12	1756	1711	1776	1574	1736	1664	2023	1572	24	119	46	28	42	2	17	1363	1760	1753	1814	1868	0	0	1655
1236	Positive	7.930	254.26773	Unknown	[M+H]+	null	null	null	null	null	636	648	673	732	535	548	608	694	236	308	171	210	299	273	21	0	3551	3415	3316	3457	3270	3347	3391	3240	676	662	44	712	700	710	3600	3528	3570	3680	3379	3401	0	0	3347
1237	Positive	1.159	254.82164	Unknown	[M+H]+	null	null	null	null	null	12	0	5	0	8	18	6	4	4	4	12	8	9	10	5	2503	55	93	72	67	116	112	113	105	0	12	6	15	15	5	0	52	136	122	64	73	3096	2023	113
1238	Positive	0.909	254.84258	Unknown	[M+H]+	null	null	null	null	null	108	218	95	284	87	125	236	8	155	259	258	336	11	134	21	13	963	602	306	414	278	513	460	712	126	5	0	120	170	236	2031	670	630	586	584	915	9	8	1086
1239	Positive	1.177	254.84312	Unknown	[M+H]+	null	null	null	null	null	3270	3248	3471	3667	2544	1251	1673	1431	3632	3675	3978	3949	3511	3434	5	47	9682	9636	7304	9518	10668	11047	10182	10625	3239	3051	3243	3035	3730	3642	1	6892	9425	9178	11335	10303	90	77	9212
1240	Positive	1.088	254.84656	Unknown	[M+H]+	null	null	null	null	null	3515	3381	3612	3791	2643	2436	3355	3299	3766	3769	4271	4081	3511	3434	6	10	2532	2538	7317	9492	10597	10085	9343	10014	3429	3051	3206	3027	3739	3606	0	6775	9344	9204	10826	9776	42	32	3164
1241	Positive	0.396	254.85362	Unknown	[M+H]+	null	null	null	null	null	0	0	0	0	0	12	0	0	6	0	0	0	0	0	27	80	107	257	161	324	134	254	450	396	8	0	10	6	0	0	57	324	256	348	357	257	1080	716	290
1242	Positive	0.426	254.87447	Unknown	[M+H]+	null	null	null	null	null	0	0	0	0	0	8	14	7	8	6	7	0	13	6	45	43	536	454	1569	2416	2304	2629	1486	1686	0	0	6	0	7	0	60	1047	1454	1437	2274	1485	220	241	481
1243	Positive	1.382	254.99547	low score: (4S,5Z,6S)-4-(2-methoxy-2-oxoethyl)-5-[2-[(E)-3-phenylprop-2-enoyl]oxyethylidene]-6-[(2S,3R,4S,5S,6R)-3,4,5-trihydroxy-6-(hydroxymethyl)oxan-2-yl]oxy-4H-pyran-3-carboxylic acid	[M+K]+	255.00542	C12H8O4	8-methoxypsoralens	QXKHYNVANLEOEG-UHFFFAOYSA-N	O=C1OC2=C(OC)C=3OC=CC3C=C2C=C1	6	6	0	7	6	8	5	6	7	6	11	0	0	12	48	1935	880	1189	571	207	238	236	250	261	1	0	5	12	6	6	106	375	311	247	193	303	5174	6201	976
1244	Positive	1.011	255.00098	no MS2: (4S,5Z,6S)-4-(2-methoxy-2-oxoethyl)-5-[2-[(E)-3-phenylprop-2-enoyl]oxyethylidene]-6-[(2S,3R,4S,5S,6R)-3,4,5-trihydroxy-6-(hydroxymethyl)oxan-2-yl]oxy-4H-pyran-3-carboxylic acid	[M+K]+	255.00542	C12H8O4	8-methoxypsoralens	QXKHYNVANLEOEG-UHFFFAOYSA-N	O=C1OC2=C(OC)C=3OC=CC3C=C2C=C1	1846	1768	1691	1760	1705	1747	1719	1677	1908	2072	2040	2010	1928	1800	461	4	0	1	95	33	40	49	62	23	1639	1850	2507	2007	1821	1994	1381	114	0	156	21	6	0	10	0
1245	Positive	1.274	255.01083	low score: (4S,5Z,6S)-4-(2-methoxy-2-oxoethyl)-5-[2-[(E)-3-phenylprop-2-enoyl]oxyethylidene]-6-[(2S,3R,4S,5S,6R)-3,4,5-trihydroxy-6-(hydroxymethyl)oxan-2-yl]oxy-4H-pyran-3-carboxylic acid	[M+K]+	255.00542	C12H8O4	8-methoxypsoralens	QXKHYNVANLEOEG-UHFFFAOYSA-N	O=C1OC2=C(OC)C=3OC=CC3C=C2C=C1	16	0	19	6	25	24	8	18	35	25	40	19	12	19	33	46	23441	22564	12401	13301	16032	14971	17200	18118	32	20	24	14	10	3	332	18418	16890	15949	15770	15678	425	520	24606
1246	Positive	0.357	255.17233	low score: 4-Methylbenzylidene camphor	[M+H]+	255.17435	C18H22O	Bicyclic monoterpenoids	HEOCBCNFKCOKBX-UHFFFAOYSA-N	CC1=CC=C(C=C2C3CCC(C)(C2=O)C3(C)C)C=C1	54	37	34	30	92	60	69	32	100	33	31	55	80	86	61	100	1203	1439	1080	1243	1097	1169	1206	1289	57	35	38	75	32	47	266	1332	1061	1242	1018	1298	114	84	1122
1247	Positive	1.015	255.17404	no MS2: ESTRADIOL-17ALPHA	[M-H2O+H]+	255.17435	C18H24O2	Estrogens and derivatives	VOXZDWNPVJITMN-UHFFFAOYSA-N	CC12CCC3C(C1CCC2O)CCC4=C3C=CC(=C4)O	54	63	171	135	119	115	111	63	92	70	107	129	118	169	50	7	1794	1775	1959	918	1234	1764	1415	876	135	101	69	118	106	122	99	1640	1750	1769	1040	854	10	50	1644
1248	Positive	1.157	255.17546	no MS2: ESTRADIOL-17ALPHA	[M-H2O+H]+	255.17435	C18H24O2	Estrogens and derivatives	VOXZDWNPVJITMN-UHFFFAOYSA-N	CC12CCC3C(C1CCC2O)CCC4=C3C=CC(=C4)O	130	134	112	135	246	640	124	93	118	78	119	175	109	267	64	34	1632	1598	1670	1220	2052	1902	2133	1418	601	564	152	150	114	167	186	581	1191	2156	1416	1158	10	46	1645
1249	Positive	12.314	255.24979	Unknown	[M+H]+	null	null	null	null	null	66	76	36	49	85	59	40	47	84	65	54	70	90	92	77	25	1129	1246	2663	2490	1577	1463	2601	2687	113	73	65	89	59	53	2454	828	1419	1416	1136	1033	59	13	1445
1250	Positive	12.141	255.25035	Unknown	[M+H]+	null	null	null	null	null	71	48	103	57	109	78	72	47	61	82	84	58	143	96	68	78	3359	3488	9486	10082	5775	5864	9688	13121	129	64	77	78	67	61	272	2264	4353	4526	2615	3176	28	31	5311
1251	Positive	9.747	255.25993	low score: 2-heptadecanone	[M+H]+	255.27000	C17H34O	Ketones	TVTCXPXLRKTHAU-UHFFFAOYSA-N	O=C(C)CCCCCCCCCCCCCCC	206	191	152	81	99	164	168	122	199	182	105	124	263	224	44	85	839	847	1157	1399	1672	1705	2399	2294	194	233	112	100	161	72	1148	938	1081	1102	1980	2011	106	117	1101
1252	Positive	0.464	255.85487	Unknown	[M+H]+	null	null	null	null	null	0	0	0	6	7	0	0	6	0	0	0	0	8	0	12	58	1688	1736	1282	1397	1600	1492	2573	2128	0	0	0	0	0	7	229	1613	1976	2139	1707	1790	130	69	1909
1253	Positive	0.413	255.94244	no MS2: Triclopyr	[M+H]+	255.93295	C7H4Cl3NO3	Polyhalopyridines	REEQLXCGVXDJSQ-UHFFFAOYSA-N	ClC1=C(OCC(O)=O)N=C(Cl)C(Cl)=C1	0	0	8	8	7	0	6	0	7	12	0	0	12	0	109	2792	92	60	102	76	56	62	118	82	0	8	0	0	0	6	83	136	47	9	128	15	2336	2203	134
1254	Positive	0.862	255.99544	no MS2: Anagrelide	[M+H]+	256.00391	C10H7Cl2N3O	Quinazolines	OTBXOEAOVRKTNQ-UHFFFAOYSA-N	ClC=1C=CC=2N=C3N=C(O)CN3CC2C1Cl	8	4	7	4	9	2	0	9	5	13	16	10	5	0	53	0	47	58	39	36	20	22	38	69	6	5	5	5	8	5	1267	46	23	42	70	57	22	32	30
1255	Positive	12.397	256.26730	Unknown	[M+H]+	null	null	null	null	null	16	24	16	15	11	0	16	25	14	13	18	26	15	37	1686	857	278	87	177	180	174	191	183	162	15	20	36	22	30	27	155	152	204	125	142	150	825	1233	164
1256	Positive	12.073	256.28125	Unknown	[M+H]+	null	null	null	null	null	144	61	103	98	172	119	117	135	105	152	118	150	150	152	69	27	2276	2171	1922	1766	1623	1970	2200	2667	130	74	116	140	153	170	285	2553	2247	2282	1934	2101	56	72	2153
1257	Positive	12.267	256.28320	Unknown	[M+H]+	null	null	null	null	null	137	126	117	165	101	127	103	164	145	119	97	80	149	122	132	47	1474	1500	1502	1551	1438	1426	1415	1672	119	142	193	149	159	146	3175	1390	1498	1581	1533	1425	35	26	1812
1258	Positive	12.814	256.28494	Unknown	[M+H]+	null	null	null	null	null	738	628	1211	1103	904	920	1050	1229	467	576	494	474	530	456	74	22	231	419	478	500	638	504	447	473	1025	1326	172	1032	977	1066	448	439	456	549	405	574	0	34	376
1259	Positive	8.269	256.28580	Unknown	[M+H]+	null	null	null	null	null	1149	1093	1129	1241	964	776	1015	971	389	423	319	379	424	528	32	31	240	163	222	146	232	253	105	180	933	846	176	943	862	1219	230	256	240	176	194	317	12	9	175
1260	Positive	9.985	256.32187	Unknown	[M+H]+	null	null	null	null	null	1244	1186	1242	1267	1319	1387	1371	1280	1491	1240	1150	1364	1304	1462	11	0	46	19	49	25	45	30	47	42	1347	1464	1172	1283	1299	1254	72	54	35	27	11	30	6	0	26
1261	Positive	0.870	256.81946	Unknown	[M+H]+	null	null	null	null	null	4	5	0	0	0	5	0	4	0	0	4	0	1	0	1064	20	34	55	21	20	66	83	8	30	2	0	5	0	0	0	20	34	45	16	42	50	220	3	20
1262	Positive	1.166	256.82086	Unknown	[M+H]+	null	null	null	null	null	11	25	29	27	0	32	41	42	18	42	40	30	36	40	0	3557	156	329	255	243	218	412	177	500	31	11	60	64	63	94	0	141	366	337	197	317	4411	3270	230
1263	Positive	0.909	256.83746	Unknown	[M+H]+	null	null	null	null	null	121	204	129	256	5	157	257	261	191	281	230	336	169	163	79	6	1242	378	446	285	256	673	1008	1109	161	105	0	134	245	306	2313	1047	713	476	431	1372	24	5	1326
1264	Positive	1.178	256.83954	Unknown	[M+H]+	null	null	null	null	null	4055	4335	4067	3971	3191	1492	1943	1797	4349	4102	5068	4582	4762	4364	0	148	12674	12930	9610	12867	12744	13542	13184	13200	4194	3652	4212	3967	1967	4590	0	9308	13648	12284	12489	12666	126	175	11778
1265	Positive	1.086	256.84369	Unknown	[M+H]+	null	null	null	null	null	4405	4553	4277	4510	3366	3302	3886	4143	4865	4527	5502	4993	4762	4364	6	33	3523	3648	9307	12727	4329	5057	12348	13024	4458	4073	4247	3997	4920	4630	3	9621	13323	3079	11533	12076	18	58	3356
1266	Positive	0.425	256.87405	Unknown	[M+H]+	null	null	null	null	null	0	0	0	0	6	0	0	6	0	8	0	0	0	0	21	49	510	548	1301	1626	1428	1471	1007	1128	14	0	0	0	0	0	80	209	1024	820	528	1283	119	253	317
1267	Positive	1.380	256.99084	Unknown	[M+H]+	null	null	null	null	null	0	9	5	8	6	16	0	0	0	11	0	0	5	23	43	452	264	185	112	67	83	302	196	137	0	8	9	6	10	5	438	126	159	90	173	84	1907	2101	98
1268	Positive	1.278	257.00803	no MS2: Piperic Acid	[M+K]+	257.02106	C12H10O4	Benzodioxoles	RHBGITBPARBDPH-WZNPJAPVSA-N	O=C(O)C=CC=CC1=CC=C2OCOC2=C1	0	6	0	11	0	19	5	5	6	15	11	0	0	0	29	36	8335	7495	3951	4702	5570	5373	6319	5602	0	6	0	1	0	0	180	6862	5486	5554	4955	5565	88	332	7887
1269	Positive	0.933	257.16327	no MS2: alpha-Dihydrolysergol	[M+Na]+	257.16483	C16H20N2O	Clavines and derivatives	UFKTZIXVYHGAES-WDBKCZKBSA-N	CN1C[C@H](CO)C[C@@H]2c3cccc4[nH]cc(c34)C[C@H]21	298	428	385	563	395	23	444	446	280	409	496	488	689	621	49	67	1488	978	1049	1280	918	1026	1045	1086	508	458	38	566	478	582	7369	5236	3360	3345	2427	2853	49	37	1302
1270	Positive	1.149	257.16434	low score: ((6aR,9R,10aR)-7-methyl-4,6,6a,7,8,9,10,10a-octahydroindolo[4,3-fg]quinolin-9-yl)methanol	[M+H]+	257.16501	C16H20N2O	Clavines and derivatives	UFKTZIXVYHGAES-WDBKCZKBSA-N	OCC1CN(C)C2CC3=CNC4=CC=CC(=C43)C2C1	1848	1778	1887	1994	2161	2481	1444	1463	1027	1085	2344	2332	2905	3000	32	140	11897	15201	12471	14756	10354	9049	12099	11293	2798	2628	1566	2986	1824	1771	376	51608	37876	37008	22546	21093	62	93	5276
1271	Positive	1.060	257.17026	no MS2: ((6aR,9R,10aR)-7-methyl-4,6,6a,7,8,9,10,10a-octahydroindolo[4,3-fg]quinolin-9-yl)methanol	[M+H]+	257.16501	C16H20N2O	Clavines and derivatives	UFKTZIXVYHGAES-WDBKCZKBSA-N	OCC1CN(C)C2CC3=CNC4=CC=CC(=C43)C2C1	1986	1997	2122	2186	2330	2787	1579	1640	1074	1062	2597	2467	2926	3050	21	32	10785	5580	11147	5184	9261	8349	11251	10312	3152	3023	1551	2978	1783	1761	128	48090	15791	15522	21561	20216	51	31	2280
1272	Positive	7.164	257.18549	low score: Bakuchiol	[M+H]+	257.19000	C18H24O	Aromatic monoterpenoids	LFYJSSARVMHQJB-QIXNEVBVSA-N	OC1=CC=C(C=C1)C=CC(C=C)(C)CCC=C(C)C	50	61	68	64	68	54	42	68	55	50	66	41	71	74	240	168	1422	1275	1350	1370	1352	1402	1253	1271	49	61	57	57	23	47	1696	1123	1095	1199	1320	1321	97	161	1404
1273	Positive	12.820	257.24536	low score: ISOPALMITIC ACID_major	[M+H]+	257.24750	C16H32O2	Long-chain fatty acids	ZONJATNKKGGVSU-UHFFFAOYSA-N	CC(C)CCCCCCCCCCCCC(=O)O	93	42	54	49	24	73	55	60	50	49	47	62	47	72	4103	916	147	167	148	175	128	106	117	78	63	49	46	59	73	48	112	144	176	163	146	192	751	4675	196
1274	Positive	13.774	257.24667	low score: ISOPALMITIC ACID_major	[M+H]+	257.24750	C16H32O2	Long-chain fatty acids	ZONJATNKKGGVSU-UHFFFAOYSA-N	CC(C)CCCCCCCCCCCCC(=O)O	57	54	9	71	63	18	46	68	89	2	46	29	54	63	2628	2042	187	170	230	200	278	131	184	197	55	24	72	41	70	60	122	148	199	166	226	260	1545	2500	166
1275	Positive	13.537	257.24728	low score: ISOPALMITIC ACID_major	[M+H]+	257.24750	C16H32O2	Long-chain fatty acids	ZONJATNKKGGVSU-UHFFFAOYSA-N	CC(C)CCCCCCCCCCCCC(=O)O	31	58	51	73	26	47	47	104	46	118	54	48	50	49	388	8684	383	502	355	537	351	500	578	483	33	88	103	75	52	56	431	467	351	467	295	367	4693	2338	473
1276	Positive	12.572	257.24866	low score: ISOPALMITIC ACID_major	[M+H]+	257.24750	C16H32O2	Long-chain fatty acids	ZONJATNKKGGVSU-UHFFFAOYSA-N	CC(C)CCCCCCCCCCCCC(=O)O	54	62	55	78	35	65	39	59	21	40	38	58	83	45	800	5506	470	677	289	426	298	473	407	424	53	54	35	69	52	78	158	489	426	365	445	602	691	1182	176
1277	Positive	12.464	257.25006	low score: palmitic acid	[M+H]+	257.25000	C16H32O2	Long-chain fatty acids	IPCSVZSSVZVIGE-UHFFFAOYSA-N	O=C(O)CCCCCCCCCCCCCCC	54	31	58	66	38	65	42	50	86	41	64	59	64	64	752	633	972	1512	730	797	670	456	697	805	73	17	13	49	57	50	253	1017	669	595	462	793	2003	886	618
1278	Positive	13.601	257.26459	Unknown	[M+H]+	null	null	null	null	null	291	227	206	189	214	163	138	192	205	205	272	231	293	235	33	432	3878	4841	4908	15153	4370	4826	6078	6203	169	192	290	236	268	255	15653	3821	13755	4578	3884	4334	139	244	4047
1279	Positive	12.664	257.26645	Unknown	[M+H]+	null	null	null	null	null	232	230	215	190	204	247	275	239	168	213	246	265	263	291	96	276	3058	3187	2439	2309	1944	2062	2639	2172	203	170	238	250	248	286	13480	2563	2324	2279	2219	2288	54	241	2252
1280	Positive	13.491	257.26669	Unknown	[M+H]+	null	null	null	null	null	379	268	413	515	237	268	363	322	385	340	259	259	446	368	0	81	12525	15576	16185	15174	12346	13993	18640	19532	490	262	2199	345	307	362	1361	14559	13755	13986	8471	11072	299	190	15278
1281	Positive	12.511	257.26678	Unknown	[M+H]+	null	null	null	null	null	178	237	194	182	190	251	233	238	161	213	236	227	224	291	74	276	16660	17793	10258	9692	7389	8284	8495	9208	222	237	276	207	254	227	1557	12764	9747	8868	8043	8752	86	308	7821
1282	Positive	13.349	257.27277	Unknown	[M+H]+	null	null	null	null	null	2266	2446	4371	4314	1738	1884	2404	2283	2240	2515	1465	1861	2572	2623	123	81	1354	1278	1199	1190	1325	1027	1316	1079	2034	2326	271	2136	2108	2622	952	1112	1174	1312	1133	1149	32	58	1480
1283	Positive	0.440	257.85138	Unknown	[M+H]+	null	null	null	null	null	0	24	0	0	8	0	0	6	0	0	0	0	6	0	12	162	464	1118	727	819	677	972	1637	1408	0	0	0	0	8	0	151	563	942	1548	950	922	218	266	1126
1284	Positive	1.133	257.99701	Unknown	[M+H]+	null	null	null	null	null	246	318	372	576	258	266	477	468	543	508	382	480	847	1057	64	3	65	101	65	24	482	158	44	442	625	491	778	918	847	940	68	348	133	1327	15	87	0	11	34
1285	Positive	0.893	258.10800	sn-Glycero-3-phosphocholine	[M]+	258.11011	C8H21NO6P	Glycerophosphocholines	SUHOQUVVVLNYQR-MRVPVSSYSA-O	OCC(O)COP(O)(=O)OCC[N+1](C)(C)C	6	4	5	12	4	5	9	5	11	8	5	16	77	10	8733	367	47	50	40	34	42	27	32	49	6	5	4	81	18	5	140	17	28	38	68	51	46	54	5
1286	Positive	1.244	258.11066	sn-Glycero-3-phosphocholine	[M]+	258.11011	C8H21NO6P	Glycerophosphocholines	SUHOQUVVVLNYQR-MRVPVSSYSA-O	OCC(O)COP(O)(=O)OCC[N+1](C)(C)C	42	65	141	101	87	180	59	44	77	108	80	82	496	205	61	12900	390	241	516	369	793	681	540	406	85	209	142	321	281	336	11	675	336	390	396	412	3714	2117	425
1287	Positive	0.933	258.12799	low score: cyclo(Trp-Ala)	[M+H]+	258.12372	C14H15N3O2	Alpha amino acids and derivatives	VDMMFAOUINDEGC-UHFFFAOYSA-N	O=C(NC1CC2=CNC3=C2C=CC=C3)C(C)NC1=O	2553	8617	4942	15523	2027	2542	7244	7420	16566	18300	7050	7497	36851	38901	420	68	313	239	177	458	498	607	599	717	9949	9894	20	35909	25129	25409	12736	413	200	326	591	429	45	18	211
1288	Positive	1.033	258.12817	low score: cyclo(Trp-Ala)	[M+H]+	258.12372	C14H15N3O2	Alpha amino acids and derivatives	VDMMFAOUINDEGC-UHFFFAOYSA-N	O=C(NC1CC2=CNC3=C2C=CC=C3)C(C)NC1=O	10374	9570	17082	17197	7942	7878	8326	8104	21015	21321	20991	20401	37360	38901	808	62	458	481	303	451	498	607	599	717	30743	31844	34411	36266	25595	25689	2705	404	385	495	597	429	0	18	211
1289	Positive	1.254	258.13074	low score: cyclo(Trp-Ala)	[M+H]+	258.12372	C14H15N3O2	Alpha amino acids and derivatives	VDMMFAOUINDEGC-UHFFFAOYSA-N	O=C(NC1CC2=CNC3=C2C=CC=C3)C(C)NC1=O	4031	3824	6874	6030	3200	3447	3337	3307	9612	8392	8987	7932	15442	16428	43	430	11609	12010	16296	11950	20282	17925	19714	16112	12402	12362	3997	11993	9381	9783	90	18970	11649	12181	12914	12755	152	140	7597
1290	Positive	8.285	258.27896	N,N-Dimethyltetradecylamine-N-oxide	[M+H]+	258.27914	C16H35NO	Long-chain alkyl amine oxides	ONHFWHCMZAJCFB-UHFFFAOYSA-N	CCCCCCCCCCCCCC[N+](C)(C)[O-]	51	5	42	68	82	119	19	56	48	63	33	44	61	14	24625	116	171	257	103	214	206	134	168	117	64	42	69	45	57	57	187	251	165	165	158	83	39	21	205
1291	Positive	7.703	258.27982	low score: N,N-Dimethyltetradecylamine-N-oxide	[M+H]+	258.27914	C16H35NO	Long-chain alkyl amine oxides	ONHFWHCMZAJCFB-UHFFFAOYSA-N	CCCCCCCCCCCCCC[N+](C)(C)[O-]	47	52	33	21	30	58	20	37	42	34	60	52	9	47	21	19113	283	280	155	190	217	175	198	155	20	28	22	17	16	25	238	258	197	188	209	146	765	785	226
1292	Positive	7.543	258.28137	low score: N,N-Dimethyltetradecylamine-N-oxide	[M+H]+	258.27914	C16H35NO	Long-chain alkyl amine oxides	ONHFWHCMZAJCFB-UHFFFAOYSA-N	CCCCCCCCCCCCCC[N+](C)(C)[O-]	31	21	34	38	44	27	20	39	34	27	25	109	16	23	28	47	227	171	160	165	110	181	114	151	37	39	45	42	24	40	151	183	211	191	200	107	5047	5674	223
1293	Positive	8.054	258.29700	Unknown	[M+H]+	null	null	null	null	null	132	370	341	281	300	208	330	157	31	23	18	25	44	19	0	31	271	210	120	141	192	182	164	148	240	161	18	247	1142	396	6837	218	142	197	225	226	15	12	208
1294	Positive	1.264	258.29785	Unknown	[M+H]+	null	null	null	null	null	13	4	12	0	18	12	10	0	7	5	5	0	12	6	0	5	1317	1789	866	797	1390	1112	1259	1690	6	3	8	19	4	5	11	1121	1057	1093	1444	1493	5	0	1115
1295	Positive	8.873	258.29892	Unknown	[M+H]+	null	null	null	null	null	618	569	1099	747	996	903	1097	744	725	896	183	450	525	581	6	5	44	49	24	50	41	26	32	46	979	874	27801	872	1258	933	42	37	47	15	20	8	33	0	31
1296	Positive	8.241	258.29929	Unknown	[M+H]+	null	null	null	null	null	117	105	117	6	100	78	66	49	2	73	30	6	35	47	510	24	24	28	38	28	38	31	46	40	81	80	1428	36	73	57	232	36	37	45	47	28	15	0	49
1297	Positive	8.619	258.30341	Unknown	[M+H]+	null	null	null	null	null	15536	17869	26862	26357	22593	23490	27488	28508	14677	14528	8851	9247	14494	13681	35	29	26	46	39	98	0	50	57	0	23343	23814	35	27012	25586	23018	46	47	43	56	40	6	0	8	0
1298	Positive	7.928	258.30472	Unknown	[M+H]+	null	null	null	null	null	1516	1663	1572	1630	1356	1240	1406	1217	139	159	110	118	114	99	6	18	232	102	50	120	122	72	120	146	1248	1186	8	1278	1150	1294	228	89	104	95	81	173	0	0	111
1299	Positive	1.148	258.81879	Unknown	[M+H]+	null	null	null	null	null	5	19	10	24	11	24	33	16	15	18	21	22	20	60	0	1561	144	240	249	228	225	191	193	352	35	18	40	48	60	68	5	240	324	240	184	162	1691	1432	206
1300	Positive	1.182	258.83545	Unknown	[M+H]+	null	null	null	null	null	1747	1955	1841	1982	1500	1106	1664	1588	1869	1920	2234	2158	2237	2117	0	75	5489	6287	4957	6165	6633	6965	5924	7050	1630	1677	626	1799	2284	800	5	4203	5774	6538	6332	6450	154	77	5433
1301	Positive	1.090	258.84183	Unknown	[M+H]+	null	null	null	null	null	2086	2193	2113	2227	1661	1283	1872	1918	2197	2279	2601	2515	2232	2139	0	27	5091	5569	4486	5837	5800	5645	4878	6449	1924	2013	2026	1813	2338	2193	0	3852	5372	6017	5358	5434	8	26	5033
1302	Positive	0.456	258.88757	Unknown	[M+H]+	null	null	null	null	null	17	31	3	33	6	25	16	8	23	26	19	14	12	20	204	4595	1565	1604	1695	2046	2052	2034	1896	2074	15	27	11	21	17	30	164	2094	1093	1866	2099	1850	6561	4846	1650
1303	Positive	0.427	258.90363	Unknown	[M+H]+	null	null	null	null	null	0	8	0	6	0	6	7	0	8	8	6	14	7	11	39	446	549	647	540	476	787	791	1073	842	6	9	6	7	6	19	176	214	903	916	843	753	627	671	507
1304	Positive	0.862	258.91757	Unknown	[M+H]+	null	null	null	null	null	14	8	5	10	16	16	20	4	13	11	21	19	0	10	8	52	227	541	479	228	228	428	287	489	9	14	16	20	20	5	1202	424	352	242	454	455	24	46	323
1305	Positive	1.340	258.98962	Unknown	[M+H]+	null	null	null	null	null	0	6	0	1	6	10	5	0	13	6	0	0	18	3	18	811	119	115	96	49	120	121	74	92	6	18	9	12	9	5	282	157	102	57	67	52	1235	686	60
1306	Positive	0.777	259.06537	no MS2: Norlichexanthone	[M+H]+	259.06009	C14H10O5	Xanthones	AQZHBCDRWFMXIN-UHFFFAOYSA-N	O=C1C2=C(OC3=C1C(C)=CC(O)=C3)C=C(O)C=C2O	3	4	5	0	20	0	10	10	5	6	12	0	10	14	1075	37	117	76	64	71	72	84	63	40	0	5	0	9	4	6	175	81	76	67	117	50	9	61	127
1307	Positive	0.814	259.08371	no MS2: Carbmazepine	[M+Na]+	259.08420	C15H12N2O	Dibenzazepines	FFGPTBGBLSHEPO-UHFFFAOYSA-N	N=C(O)N1C=2C=CC=CC2C=CC=3C=CC=CC31	8	9	3	5	5	0	4	5	16	19	4	6	8	7	99	27	25	43	49	36	46	52	39	44	1	8	6	3	10	6	1524	78	38	21	90	33	28	34	39
1308	Positive	12.112	259.19156	low score: dibutyladipate	[M+H]+	259.19040	C14H26O4	Fatty acid esters	XTJFFFGAUHQWII-UHFFFAOYSA-N	CCCCOC(=O)CCCCC(=O)OCCCC	97	94	68	92	78	69	99	101	63	89	102	90	85	73	557	803	340	447	653	666	421	529	559	699	87	102	118	113	93	84	269	334	389	437	340	394	603	738	389
1309	Positive	0.039	259.22388	Unknown	[M+H]+	null	null	null	null	null	437	371	314	299	435	340	301	276	373	371	372	386	372	513	102	117	4085	4241	4078	3820	4229	4386	4023	4178	276	331	384	422	308	407	2134	3613	4532	3504	4312	4743	202	67	3906
1310	Positive	1.306	259.63269	Unknown	[M+H]+	null	null	null	null	null	0	5	0	0	0	0	0	5	0	0	5	6	0	0	0	0	0	0	1863	920	34	0	20	20	6	6	9	0	0	0	0	12	0	0	6	8	0	0	0
1311	Positive	7.087	259.63858	Unknown	[M+H]+	null	null	null	null	null	0	5	0	0	0	0	6	0	0	11	0	0	0	0	0	0	0	8	1430	745	24	37	0	0	0	5	0	0	5	5	8	16	30	7	24	19	8	0	0
1312	Positive	1.079	259.98129	Unknown	[M+H]+	null	null	null	null	null	74	104	105	73	54	65	87	84	58	47	112	140	114	92	62	22	1075	956	322	488	411	303	216	532	144	158	117	88	88	126	34	963	525	920	1176	464	20	11	435
1313	Positive	1.166	260.09897	no MS2: Lenalidomide	[M+H]+	260.10297	C13H13N3O3	Isoindolones	GOTYRUGSSMKFNF-UHFFFAOYSA-N	C1=CC(=C2C(=C1)C(N(C2)C3C(NC(CC3)=O)=O)=O)N	62	61	36	26	69	25	29	91	54	52	98	100	53	82	129	34	164	208	177	249	258	239	379	311	68	62	65	66	25	71	2061	428	272	246	207	151	19	25	126
1314	Positive	6.445	260.18771	Hexanoyl-L-Carnitine	[M+H]+	260.18564	C13H25NO4	Acyl carnitines	VVPRQWTYSNDTEA-LLVKDONJSA-N	CCCCCC(=O)O[C@H](CC(=O)[O-])C[N+](C)(C)C	69	38	59	48	49	36	53	45	57	38	37	37	43	57	4796	137	61	56	60	58	56	35	71	50	54	51	54	41	61	34	351	36	63	37	30	24	180	136	33
1315	Positive	6.429	260.20563	low score: Vesamicol	[M+H]+	260.20090	C17H25NO	Phenylpiperidines	YSSBJODGIYRAMI-IAGOWNOFSA-N	OC1CCCCC1N2CCC(C=3C=CC=CC3)CC2	122	191	130	106	141	121	114	111	89	108	107	118	97	137	241	176	41	131	111	55	83	118	86	63	122	152	108	184	128	112	5384	83	95	75	90	109	261	219	114
1316	Positive	1.186	260.83075	Unknown	[M+H]+	null	null	null	null	null	114	108	230	79	38	66	180	330	365	180	176	239	207	356	0	14	674	1080	654	715	1137	550	1106	1096	96	244	432	127	420	386	13	269	652	788	505	490	39	18	716
1317	Positive	0.444	260.87701	Unknown	[M+H]+	null	null	null	null	null	6	14	0	6	8	8	0	0	0	0	9	18	6	7	64	5500	934	718	556	886	651	643	593	528	0	7	6	6	20	0	231	1007	452	577	690	588	2248	1769	702
1318	Positive	0.437	260.90744	Unknown	[M+H]+	null	null	null	null	null	6	0	0	6	8	6	0	6	0	0	13	9	7	6	31	432	335	356	1283	492	937	1004	1330	951	0	12	14	6	6	6	234	325	1256	1214	899	927	507	381	552
1319	Positive	1.105	260.94803	Unknown	[M+H]+	null	null	null	null	null	177	175	122	172	174	102	137	108	132	131	141	187	195	216	6	8024	198	390	403	270	513	786	460	532	213	252	276	264	150	151	308	609	526	369	335	478	8069	8354	290
1320	Positive	1.068	260.96823	Unknown	[M+H]+	null	null	null	null	null	3051	2731	2817	2871	2332	2851	1938	1985	2239	2451	1943	2174	3841	4026	69	398	18619	18966	14132	13605	22714	21888	17830	17480	4026	3999	2805	3554	2962	2936	90	23383	21915	21433	22290	21741	457	422	13753
1321	Positive	0.893	261.01276	low score: isofraxidin	[M+K]+	261.01596	C11H10O5	7-hydroxycoumarins	HOEVRHHMDJKUMZ-UHFFFAOYSA-N	O=C1OC=2C(OC)=C(O)C(OC)=CC2C=C1	0	8	0	6	13	27	6	5	7	11	5	5	5	9	4958	454	124	129	158	59	98	168	130	106	5	5	9	9	14	12	310	187	104	172	173	154	676	598	291
1322	Positive	0.909	261.02832	low score: Ifosfamide	[M+H]+	261.03210	C7H15Cl2N2O2P	Isofamides	HOMGKSMUEGBAAB-UHFFFAOYSA-N	ClCCN(P(OC1)(=O)NCCCl)CC1	4	249	139	240	8	10	15	331	253	395	333	404	191	165	551	56	915	21	513	554	230	1009	932	621	220	5	7	122	314	5	9144	1254	594	576	838	1097	81	34	1287
1323	Positive	1.052	261.03421	no MS2: MLS002154021-01!Ifosfamide3778-73-2	[M+H]+	261.03210	C7H15Cl2N2O2P	Isofamides	HOMGKSMUEGBAAB-UHFFFAOYSA-N	O=P1(OCCCN1CCCl)NCCCl	2075	1904	1811	1930	2189	1940	2005	1951	2089	2051	2404	2278	1634	1350	128	190	913	1376	1106	1402	848	941	873	635	2270	2110	2300	1407	1930	1897	102	1228	1060	716	519	1009	111	155	615
1324	Positive	7.652	261.10965	low score: MMV023233	[M+H]+	261.11346	C16H12N4	Aminoquinolines and derivatives	YUJSGIUJPLJCOO-UHFFFAOYSA-N	N=C1NC=CC=2C=CC(=CC21)C=3C=CC4=NC=CN4C3	27	7	22	15	8	20	22	17	23	16	15	12	20	56	6965	2622	190	108	116	97	146	81	141	81	31	24	20	16	28	22	147	134	81	65	102	137	2943	3276	70
1325	Positive	7.653	261.12778	low score: 2-(4-oxoquinazolin-3(4H)-yl)ethyl isobutyrate	[M+H]+	261.13000	C14H16N2O3	Quinazolines	DXZNCVRUZDRWLR-UHFFFAOYSA-N	O=C(OCCN1C=NC=2C=CC=CC2C1=O)C(C)C	2433	398	392	382	481	423	168	588	364	427	325	429	509	479	477	231	2631	3219	2546	2865	3409	3195	3193	3378	348	236	3022	497	419	315	5052	3075	3351	3350	2920	2841	326	438	3197
1326	Positive	1.137	261.13245	low score: Diaveridine	[M+H]+	261.13461	C13H16N4O2	Dimethoxybenzenes	LDBTVAXGKYIFHO-UHFFFAOYSA-N	COC1=C(C=C(C=C1)CC2=CN=C(N=C2N)N)OC	204	216	212	175	189	268	206	146	177	186	242	219	243	244	543	919	696	692	1081	919	878	1022	675	1232	152	175	210	228	263	222	160	960	1107	794	812	877	6245	6227	1134
1327	Positive	7.766	261.13574	low score: Diaveridine	[M+H]+	261.13461	C13H16N4O2	Dimethoxybenzenes	LDBTVAXGKYIFHO-UHFFFAOYSA-N	COC1=C(C=C(C=C1)CC2=CN=C(N=C2N)N)OC	2676	2458	2427	2422	2616	3247	2595	2177	2277	2374	2303	2453	2257	1923	168	256	2683	372	2074	607	580	434	441	503	1887	1810	3075	2636	1916	1939	580	556	432	634	519	400	277	366	3127
1328	Positive	6.019	261.14890	low score: Isoleucylglutamate	[M+H]+	261.14450	C11H20N2O5	Dipeptides	KTGFOCFYOZQVRJ-UHFFFAOYSA-N	O=C(O)CCC(NC(=O)C(N)C(C)CC)C(=O)O	150	143	96	120	132	131	134	167	134	109	84	83	160	153	370	189	9655	9102	6261	6350	5614	6362	4403	5167	131	137	139	195	158	151	14231	11012	7501	7722	4718	5663	225	212	9333
1329	Positive	1.151	261.14960	low score: Isoleucylglutamate	[M+H]+	261.14450	C11H20N2O5	Dipeptides	KTGFOCFYOZQVRJ-UHFFFAOYSA-N	O=C(O)CCC(NC(=O)C(N)C(C)CC)C(=O)O	3900	3822	1617	1553	703	821	2236	2159	1505	1474	2761	2864	1174	1285	1420	234	12637	12554	11831	13514	11967	12015	12884	13712	2945	2548	1942	2251	1275	1404	1295	9741	13966	14662	10343	10397	424	375	18687
1330	Positive	15.959	261.15005	low score: 3-hydroxy-5,5,8a-trimethyl-3,4,4a,6,7,8-hexahydronaphthalene-2-carboxylic acid	[M+Na]+	261.14612	C14H22O3	Beta hydroxy acids and derivatives	LQZXAHKUYJVAAR-UHFFFAOYSA-N	O=C(O)C1=CC2(C)CCCC(C)(C)C2CC1O	143	65	106	72	67	38	66	102	104	88	95	54	106	68	3072	2382	632	409	640	581	743	644	725	765	116	113	29	65	76	95	799	678	692	474	662	758	2504	336	702
1331	Positive	0.380	261.15259	no MS2: NCGC00386106-01_C16H22O4_(1R,2E,6S,10E,11aS,14aR)-1-Hydroxy-6-methyl-6,7,8,9,11a,12,14,14a-octahydro-4H-cyclopenta[f]oxacyclotridecine-4,13(1H)-dione	[M-H2O+H]+	261.14853	C16H22O4	Macrolides and analogues	IKUWMGOXYQGWPC-ZBDJHBETSA-N	C[C@@H]1CCC\C=C\[C@H]2CC(=O)C[C@@H]2[C@@H](O)\C=C\C(=O)O1	84	83	93	99	122	100	99	118	57	178	96	113	110	58	176	373	946	1052	1068	1234	1006	1188	988	1243	81	95	47	98	138	133	312	1092	927	962	1222	1077	139	195	978
1332	Positive	1.230	261.16425	no MS2: Beta-Caryophyllene Alcohol	[M+K]+	261.16153	C15H26O	Tertiary alcohols	FUQAYSQLAOJBBC-UHFFFAOYSA-N	OC12CCCC(C)(CCC3C1CC3(C)C)C2	1040	2138	845	1297	867	790	922	1615	1262	728	1167	1843	585	632	49	146	5184	3936	3760	4899	3808	3455	3659	4177	2097	1091	1238	594	567	627	1292	4038	4513	4944	3665	3125	62	48	4723
1333	Positive	0.956	261.19952	no MS2: Ropinirole	[M+H]+	261.19614	C16H24N2O	Indolines	UHSKFQJFRQCDBE-UHFFFAOYSA-N	CCCN(CCC)CCC1=C2CC(=O)NC2=CC=C1	20	23	29	31	29	14	39	29	27	23	9	26	41	43	71	18	35	50	8	33	4	24	48	47	27	46	22	90	54	29	3557	12	31	51	54	84	18	1	3
1334	Positive	1.548	261.25943	Unknown	[M+H]+	null	null	null	null	null	1603	1506	1727	1791	1383	1765	1769	1703	1790	1725	1583	1570	1903	1863	38	111	2815	2997	2824	2626	3237	2847	2779	3092	1507	1537	1975	1771	1770	1776	2254	2956	3303	3018	3135	2990	48	67	3038
1335	Positive	0.396	261.26093	Unknown	[M+H]+	null	null	null	null	null	1407	1291	1294	1475	1437	1618	1382	1110	1466	1344	1145	1459	1405	1438	40	94	5407	5808	4544	4772	5082	4805	5531	5751	1220	1442	1392	1138	1358	1365	2552	5628	5591	5292	4784	5223	89	6	5171
1336	Positive	9.000	261.26880	Unknown	[M+H]+	null	null	null	null	null	1943	1988	2198	1900	1975	2389	2189	2315	1822	1829	2152	1855	1765	1848	0	0	2870	2502	3201	2857	3429	2468	2517	2425	2139	1986	1701	1685	1308	1996	3139	3545	2579	3239	2615	2734	34	124	2978
1337	Positive	0.436	261.89029	Unknown	[M+H]+	null	null	null	null	null	0	0	0	8	4	0	0	6	6	6	16	0	7	0	41	1592	686	702	784	884	942	810	1293	1175	6	8	0	0	6	0	102	820	963	1280	917	967	1672	1466	924
1338	Positive	0.431	261.91385	Unknown	[M+H]+	null	null	null	null	null	22	20	6	18	0	22	8	15	8	6	8	10	20	16	22	202	507	632	1428	767	1622	1729	1039	1842	12	0	14	12	0	10	61	1049	1130	1077	1638	1746	183	98	468
1339	Positive	0.652	261.94748	Unknown	[M+H]+	null	null	null	null	null	23	6	0	0	11	5	0	10	0	0	6	29	9	14	255	957	78	34	42	64	65	36	36	44	12	4	7	22	15	21	73	30	47	42	15	78	1262	1182	75
1340	Positive	1.006	262.12872	low score: Mycosporine serinol	[M+H]+	262.12851	C11H19NO6	Cyclohexenones	VVTDHOIRNPCGTH-NSHDSACASA-N	COC1=C(NC(CO)CO)C[C@](CO)(O)CC1=O	36	53	32	29	47	97	61	81	37	53	64	94	78	88	10588	114	83	45	19	56	44	33	75	66	59	89	39	15	17	40	307	75	40	28	19	60	187	204	20
1341	Positive	1.319	262.12927	no MS2: Mycosporine serinol	[M+H]+	262.12851	C11H19NO6	Cyclohexenones	VVTDHOIRNPCGTH-NSHDSACASA-N	COC1=C(NC(CO)CO)C[C@](CO)(O)CC1=O	79	53	37	20	45	57	51	39	50	65	56	43	42	107	97	1396	168	184	264	380	218	293	304	222	52	40	54	27	40	56	40	437	410	436	340	320	460	654	128
1342	Positive	1.002	262.14893	low score: Unknown (carbon number 14); PlaSMA ID-1156	[M+H]+	262.15509	C14H19N3O2	Unknown	null	null	375	414	187	194	241	313	196	241	274	425	250	334	222	234	284	53	253	97	224	122	202	167	359	203	296	244	113	168	71	92	7254	456	179	318	122	205	24	20	286
1343	Positive	1.222	262.15161	no MS2: N1-Norphysostigmine	[M+H]+	262.15500	C14H19N3O2	Pyrroloindoles	DWMBEPKCENULIA-OCCSQVGLSA-N	O=C(NC)OC1=CC=C(N(C)[C@]2([H])[C@@]3(C)CCN2)C3=C1	818	724	529	423	408	388	588	512	525	529	759	844	466	413	90	429	1936	2015	1847	1777	2332	1926	1997	1991	558	529	559	283	237	394	234	2291	1746	2445	1489	1537	87	77	2822
1344	Positive	1.173	262.18851	no MS2: verruculotoxin	[M+NH4]+	262.19138	C15H20N2O	Alpha amino acid amides	CUANCTHYEDWUMU-KBPBESRZSA-N	OC1=NC(CC=2C=CC=CC2)CN3CCCCC13	574	535	614	634	628	534	569	514	533	433	567	559	558	546	20	48	305	512	493	559	437	98	265	346	776	642	1269	528	497	463	3321	314	194	326	514	641	0	6	122
1345	Positive	0.640	262.87302	Unknown	[M+H]+	null	null	null	null	null	0	7	0	8	0	6	6	6	6	0	0	0	5	5	98	508	1578	2094	1922	1893	1816	2014	1807	1720	5	0	0	8	6	0	404	1811	1945	2031	1905	1683	308	368	1902
1346	Positive	0.744	262.87436	Unknown	[M+H]+	null	null	null	null	null	4	17	0	5	5	6	0	10	8	0	5	5	5	5	94	298	1976	2088	1978	1647	1826	2031	1805	1763	5	0	5	5	6	5	379	2099	1960	2011	1905	1537	183	425	2238
1347	Positive	0.441	262.87933	Unknown	[M+H]+	null	null	null	null	null	0	0	12	0	8	9	6	15	0	8	7	6	0	0	51	1383	614	812	1200	1073	971	998	1385	1670	12	0	0	8	0	7	370	735	1050	1153	994	924	1066	966	770
1348	Positive	1.105	262.94510	Unknown	[M+H]+	null	null	null	null	null	23	6	38	4	17	34	23	15	6	50	26	32	42	24	52	2596	250	187	88	133	147	194	99	95	18	28	17	23	23	28	185	215	132	142	169	52	2119	2417	103
1349	Positive	1.074	262.96588	Unknown	[M+H]+	null	null	null	null	null	1006	913	876	858	794	702	554	593	665	761	626	559	1519	1149	29	157	5780	6640	4668	3743	7751	7733	6541	5560	1434	1274	944	1120	1113	899	47	7469	7022	6158	6576	5246	41	154	3700
1350	Positive	0.870	263.01111	no MS2: L-Cystine	[M+Na]+	263.01001	C6H12N2O4S2	L-cysteine-S-conjugates	LEVWYRKDKASIDU-IMJSIDKUSA-N	O=C(O)C(N)CSSCC(N)C(=O)O	9	64	50	11	36	6	5	7	59	5	49	16	19	6	1616	241	102	32	41	25	31	95	106	71	25	10	12	18	14	9	340	22	52	86	142	102	246	10	123
1351	Positive	1.250	263.01144	no MS2: L-Cystine	[M+Na]+	263.01001	C6H12N2O4S2	L-cysteine-S-conjugates	LEVWYRKDKASIDU-IMJSIDKUSA-N	O=C(O)C(N)CSSCC(N)C(=O)O	21	54	22	9	54	0	14	32	45	29	16	22	107	25	31	1100	608	535	312	465	492	500	490	383	26	15	32	50	48	96	182	492	582	571	361	334	633	490	499
1352	Positive	0.909	263.02664	no MS2: 1,4-dihydroxyanthraquinone	[M+Na]+	263.03000	C14H8O4	Anthraquinones	GUEIZVNYDFNHJU-UHFFFAOYSA-N	O=C1C=2C=CC=CC2C(=O)C=3C(O)=CC=C(O)C13	54	108	83	6	92	115	128	140	9	145	137	168	65	72	161	25	345	253	53	214	200	285	401	216	66	60	5	106	137	151	3474	291	219	360	340	493	30	18	363
1353	Positive	1.223	263.02957	no MS2: SINAPIC ACID	[M+K]+	263.03162	C11H12O5	Hydroxycinnamic acids	PCMORTLOPMLEFB-ONEGZZNKSA-N	O=C(O)C=CC=1C=C(OC)C(O)=C(OC)C1	195	110	268	326	210	202	286	272	786	296	351	516	280	462	49	82	3334	2978	1867	2083	2237	2181	2077	2055	218	375	164	357	237	289	300	2614	2119	1906	1603	1433	41	85	1956
1354	Positive	1.143	263.10339	no MS2: NCGC00380330-01!2-(6-methyl-7-oxooctyl)-2H-furan-5-one [IIN-based on: CCMSLIB00000848756]	[M+K]+	263.10440	C13H20O3	Butenolides	MSOHKYKACHEERC-UHFFFAOYSA-N	CC(CCCCCC1OC(=O)C=C1)C(C)=O	234	126	188	120	183	140	198	176	125	187	232	225	214	263	45	98	1655	1693	1350	2136	1384	1857	1779	1623	121	278	273	123	108	162	69	1372	1746	1234	1772	1323	45	174	1840
1355	Positive	1.041	263.10477	no MS2: NCGC00380330-01!2-(6-methyl-7-oxooctyl)-2H-furan-5-one [IIN-based on: CCMSLIB00000848756]	[M+K]+	263.10440	C13H20O3	Butenolides	MSOHKYKACHEERC-UHFFFAOYSA-N	CC(CCCCCC1OC(=O)C=C1)C(C)=O	266	222	206	132	174	217	208	185	161	191	227	215	201	272	44	97	1655	1910	1477	1770	1587	1892	1806	2087	123	245	257	122	201	148	262	1561	1942	1997	2223	1391	42	149	1775
1356	Positive	1.226	263.15482	no MS2: 3-Hexen-1-ol O-b-D-glucopyranoside	[M+H-H2O]+	263.14999	C12H22O6	Fatty acyl glycosides of mono- and disaccharides	OZIPFYKAIOOVEJ-ODWUMMNUSA-N	OCC1OC(OCCC=CCC)C(O)C(O)C1O	172	216	185	173	211	123	203	203	163	188	179	119	170	165	50	163	498	344	702	653	699	536	509	409	156	224	123	117	138	118	39	265	430	217	732	367	40	61	336
1357	Positive	6.262	263.16946	no MS2: Oxysophocarpine	[M+H]+	263.17001	C15H22N2O2	Matrine alkaloids	QMGGMESMCJCABO-LHDUFFHYSA-N	O=C1C=CCC2N1CC3CCC[N+]4([O-])CCCC2C34	154	189	166	243	149	153	197	189	221	175	188	249	212	178	26	52	1218	1090	1218	1367	1220	1293	1215	1175	194	146	167	231	242	214	1358	1136	1134	1122	1041	1193	47	66	1019
1358	Positive	7.955	263.20071	no MS2: NCGC00384851-01_C17H28O3_2-Naphthalenemethanol, 7-(acetyloxy)decahydro-alpha,alpha,4a-trimethyl-8-methylene-	[M-H2O+H]+	263.20056	C17H28O3	Eudesmane, isoeudesmane or cycloeudesmane sesquiterpenoids	ZWIVVTOKXTZAOT-UHFFFAOYSA-N	CC(=O)OC1CCC2(C)CCC(CC2C1=C)C(C)(C)O	69	72	85	59	48	92	57	73	60	69	76	91	48	58	141	1242	32	111	46	80	53	27	51	82	69	99	68	45	78	52	61	77	43	79	49	66	132	160	25
1359	Positive	8.834	263.20172	low score: NCGC00380971-01_C17H28O3_(1R,2R,4aS,8aS)-2-[(2R)-2-Hydroxybutyl]-1,3-dimethyl-1,2,4a,5,6,7,8,8a-octahydro-1-naphthalenecarboxylic acid	[M-H2O+H]+	263.20056	C17H28O3	Secondary alcohols	HIVVBTLNCFFLPO-LVNYTYFRSA-N	CC[C@@H](O)C[C@@H]1\C(=C/[C@@H]2CCCC[C@@H]2[C@@]1(C)C(O)=O)C	117	56	147	150	105	82	69	126	94	114	71	46	58	62	1625	181	21	31	27	92	61	91	48	110	69	50	121	68	0	50	45	62	41	59	83	102	77	75	79
1360	Positive	8.196	263.21912	Unknown	[M+H]+	null	null	null	null	null	70	20	50	129	139	58	82	63	63	87	83	148	103	168	34	42	373	420	192	842	200	110	429	592	90	125	32	124	67	40	100	180	315	202	242	179	12	14	165
1361	Positive	11.682	263.23566	low score: Unknown (carbon number 18); PlaSMA ID-1165	[M+H]+	263.23810	C18H30O	Unknown	null	null	21	24	19	42	20	30	54	23	58	41	29	34	45	21	814	9436	82	75	301	243	141	113	130	246	56	42	38	39	27	46	48	97	133	197	112	108	376	2735	172
1362	Positive	12.897	263.23651	low score: Unknown (carbon number 18); PlaSMA ID-1165	[M+H-H2O]+	263.23810	C18H30O	Unknown	null	null	50	45	57	7	42	29	45	15	37	69	37	11	29	15	2767	570	18	21	62	28	80	72	100	81	29	43	39	30	13	31	18	50	66	16	59	32	340	311	45
1363	Positive	12.650	263.23666	low score: Unknown (carbon number 18); PlaSMA ID-1165	[M+H]+	263.23810	C18H30O	Unknown	null	null	23	37	50	17	10	36	22	51	44	47	65	33	24	23	219	7265	336	288	523	844	467	166	576	687	43	42	31	47	40	27	42	186	474	368	364	346	910	179	112
1364	Positive	11.587	263.23859	low score: Unknown (carbon number 18); PlaSMA ID-1165	[M+H]+	263.23810	C18H30O	Unknown	null	null	43	43	22	48	35	38	28	33	44	40	40	31	38	22	167	9627	312	427	815	493	280	452	487	771	45	36	34	38	18	26	111	162	559	425	180	343	1843	2770	356
1365	Positive	12.004	263.23898	low score: Unknown (carbon number 18); PlaSMA ID-1165	[M+H]+	263.23810	C18H30O	Unknown	null	null	46	25	29	44	34	28	24	25	42	46	34	66	70	12	6647	710	99	44	49	62	50	94	71	23	37	41	30	36	41	42	35	56	50	49	46	22	434	453	98
1366	Positive	12.537	263.25433	Unknown	[M+H]+	null	null	null	null	null	366	412	392	297	338	373	546	626	349	322	158	208	228	236	38	20	12213	15362	35319	33773	16842	19269	28173	39376	244	255	3222	208	279	244	234	9534	22616	23561	11596	12312	166	35	24450
1367	Positive	11.655	263.25449	Unknown	[M+H]+	null	null	null	null	null	65	64	155	63	81	48	51	51	30	24	31	59	107	65	95	899	7329	7710	17352	17324	7603	8778	10480	12717	48	67	74	79	71	78	1124	5471	12781	13437	5589	6492	120	240	10425
1368	Positive	12.733	263.25458	Unknown	[M+H]+	null	null	null	null	null	41	51	78	27	34	32	34	71	46	28	40	69	62	56	82	237	2659	3165	8573	7729	3016	3517	6409	7004	63	90	109	22	48	71	9905	2247	4872	4443	2316	2727	46	11	5371
1369	Positive	11.872	263.25513	Unknown	[M+H]+	null	null	null	null	null	39	73	48	48	63	55	48	50	84	62	45	65	124	87	14	71	1379	1087	2305	2109	808	899	1319	1312	120	122	71	79	47	70	5866	985	1621	1620	750	748	88	58	1506
1370	Positive	12.588	263.25723	Unknown	[M+H]+	null	null	null	null	null	463	476	486	252	338	461	642	690	466	341	188	270	221	266	0	122	13045	16550	36404	35383	17694	20105	28875	40386	279	174	3272	172	294	253	255	9978	23303	24343	12088	13138	8	19	24918
1371	Positive	11.395	263.25739	Unknown	[M+H]+	null	null	null	null	null	30	68	41	24	27	80	66	86	36	91	77	69	68	60	54	62	841	893	1713	1763	898	1053	935	1187	75	85	74	82	29	46	195	907	1870	1849	635	808	26	40	1014
1372	Positive	12.085	263.26038	Unknown	[M+H]+	null	null	null	null	null	884	927	818	698	702	731	1165	1195	648	679	163	330	504	446	61	0	224	244	131	200	253	162	222	250	721	800	125	334	467	455	154	284	246	229	254	247	28	0	306
1373	Positive	12.376	263.26132	Unknown	[M+H]+	null	null	null	null	null	9613	10398	9652	10595	8599	9596	15660	16305	8198	8458	2974	3404	4911	6077	38	0	143	263	182	72	238	192	184	212	5322	5112	109	3300	5080	5521	242	131	233	206	153	159	13	18	135
1374	Positive	0.396	263.88467	Unknown	[M+H]+	null	null	null	null	null	8	0	9	0	0	6	0	11	7	6	7	0	0	6	98	980	385	531	311	468	516	690	948	770	15	0	0	0	0	6	84	360	602	722	505	345	1533	1104	598
1375	Positive	0.426	263.91077	Unknown	[M+H]+	null	null	null	null	null	6	0	26	6	8	0	10	0	0	14	7	12	13	0	26	11	1503	1382	3424	3623	3686	4266	3021	3351	8	0	15	6	12	6	180	1670	2634	2454	4068	3856	74	76	1743
1376	Positive	7.160	264.23096	low score: NCGC00385952-01_C15H26O_1,7-Dimethyl-7-(4-methyl-3-penten-1-yl)bicyclo[2.2.1]heptan-2-ol	[M+ACN+H]+	264.23218	C15H26O	Sesquiterpenoids	SGAYOTORECIFCJ-UHFFFAOYSA-N	CC(C)=CCCC1(C)C2CCC1(C)C(O)C2	50	73	91	127	128	104	71	37	102	79	71	65	52	71	13792	8210	177	156	131	147	145	311	305	190	35	66	72	47	47	52	232	146	179	171	221	346	8758	8800	135
1377	Positive	7.139	264.25189	Unknown	[M+H]+	null	null	null	null	null	39	28	32	32	27	3	35	23	43	32	5	39	35	30	621	361	10112	11274	12301	14032	14544	14118	14454	14287	11	14	51	14	16	29	15605	9929	13416	14303	13758	14916	382	404	12990
1378	Positive	7.567	264.25504	Unknown	[M+H]+	null	null	null	null	null	7279	7043	7439	8208	7706	7233	7866	7752	7378	7962	7466	6912	6398	6880	58	167	389	583	532	607	591	607	564	593	8324	7759	5756	6247	6501	6853	444	202	487	543	595	506	116	65	506
1379	Positive	8.309	264.28665	Unknown	[M+H]+	null	null	null	null	null	52	52	113	32	117	90	78	21	120	104	98	63	62	23	36	26	862	913	626	773	657	633	490	437	108	82	126	46	70	47	2326	709	825	790	371	500	0	14	317
1380	Positive	1.125	264.85040	Unknown	[M+H]+	null	null	null	null	null	8	0	21	9	16	6	12	12	11	0	5	11	16	26	12	832	35	64	45	95	91	89	136	67	12	0	2	13	16	14	3	58	29	48	54	47	1579	1604	77
1381	Positive	0.686	264.86884	Unknown	[M+H]+	null	null	null	null	null	3	0	8	0	0	0	5	0	5	0	1	0	5	0	37	927	1504	1820	1522	1714	1360	1770	1624	1474	0	0	9	0	5	0	285	1615	1777	2013	1474	1506	656	668	1765
1382	Positive	0.436	264.87106	Unknown	[M+H]+	null	null	null	null	null	23	0	11	8	12	29	8	13	0	6	7	8	15	0	53	2407	439	548	370	319	422	438	487	770	20	8	5	6	14	6	235	260	265	437	396	335	2939	1690	276
[truncated: 13,230 more rows]
[truncated: 5 more columns]
