# Supplementary material
Source: Research Square preprint supplement (doi:10.21203/rs.3.rs-9323973/v1)
Supplement: Supplementary file 3 [file 8e9c1de049dc283dc91437b8.xlsx]

## Sheet: Sheet1
Supplementary table S4. The significantly different putative metabolites from clinical RABV infection (ranked by smallest adjusted p-value)
No.	Ionization mode	Average RT (min)	Average MZ	Metabolite name	Adduct type	Chemical formula	Ontology	INCHIKEY	SMILES	Fold change	Adjusted p-value	VIP score from oPLS-DA model
1	Positive	15.397	324.246	no MS2: Melophlin B/C/G/K/L/N/O	[M+H]+	C19H33NO3	N-alkylpyrrolidines	WBPPODSRZVXVJK-MSUUIHNZSA-N	CCCCCCCCCCCC/C(O)=C(C1=O)\C(C(N1C)C)=O	0.0071034	1.59e-21	2.18675
2	Positive	17.749	436.381	Unknown	[M+H]+	null	null	null	null	0.00082393	1.59e-21	2.14506
3	Positive	7.567	264.255	Unknown	[M+H]+	null	null	null	null	0.026619	1.59e-21	2.14176
4	Positive	13.019	398.268	low score: Phytosphingosine-1-P	[M+H]+	C18H40NO6P	Phosphosphingolipids	AYGOSKULTISFCW-KZNAEPCWSA-N	CCCCCCCCCCCCCC[C@H]([C@@H]([C@@H](COP(=O)(O)O)N)O)O	0.0026229	1.59e-21	2.10676
5	Positive	11.051	324.247	low score: Melophlin B/C/G/K/L/N/O	[M+H]+	C19H33NO3	N-alkylpyrrolidines	WBPPODSRZVXVJK-MSUUIHNZSA-N	CCCCCCCCCCCC/C(O)=C(C1=O)\C(C(N1C)C)=O	0.010095	1.59e-21	2.12482
6	Positive	19.874	419.354	low score: "(3R,5S,7R,9S,10S,12S,13R,14S,17R)-17-((2R)-7-hydroxy-6-methylheptan-2-yl)-10,13-dimethylhexadecahydro-1H-cyclopenta[a]phenanthrene-3,7,12-triol"	[M-H2O+H]+	C27H48O4	Tetrahydroxy bile acids, alcohols and derivatives	XJZGNVBLVFOSKJ-XZULNKEGSA-N	C[C@H](CCCC(C)CO)[C@H]1CC[C@H]2[C@]3([H])[C@H](O)C[C@@H]4C[C@H](O)CC[C@]4(C)[C@H]3C[C@H](O)[C@@]21C	0.011404	3.53e-21	2.12178
7	Positive	10.731	324.246	no MS2: Melophlin B/C/G/K/L/N/O	[M+H]+	C19H33NO3	N-alkylpyrrolidines	WBPPODSRZVXVJK-MSUUIHNZSA-N	CCCCCCCCCCCC/C(O)=C(C1=O)\C(C(N1C)C)=O	0.015681	6.87e-21	2.12304
8	Positive	14.963	429.442	Unknown	[M+H]+	null	null	null	null	0.0033274	1.05e-20	2.07292
9	Positive	19.88	464.414	Unknown	[M+H]+	null	null	null	null	0.00055309	2.67e-20	2.13871
10	Positive	13.226	324.247	no MS2: Melophlin B/C/G/K/L/N/O	[M+H]+	C19H33NO3	N-alkylpyrrolidines	WBPPODSRZVXVJK-MSUUIHNZSA-N	CCCCCCCCCCCC/C(O)=C(C1=O)\C(C(N1C)C)=O	0.010214	7.82e-20	2.06684
11	Positive	0.608	332.311	Unknown	[M+H]+	null	null	null	null	0.051327	3.01e-19	2.07966
12	Positive	0.083	464.413	Unknown	[M+H]+	null	null	null	null	0.0011909	3.85e-19	2.13431
13	Positive	11.647	284.353	Unknown	[M+H]+	null	null	null	null	0.022012	4.06e-19	2.05996
14	Positive	9.528	324.246	low score: Melophlin B/C/G/K/L/N/O	[M+H]+	C19H33NO3	N-alkylpyrrolidines	WBPPODSRZVXVJK-MSUUIHNZSA-N	CCCCCCCCCCCC/C(O)=C(C1=O)\C(C(N1C)C)=O	0.019745	5.35e-19	2.01775
15	Positive	14.779	350.36	Unknown	[M+H]+	null	null	null	null	0.020643	1.16e-18	2.02129
16	Positive	13.247	464.412	Unknown	[M+H]+	null	null	null	null	0.0046543	1.42e-18	2.12905
17	Positive	9.985	256.322	Unknown	[M+H]+	null	null	null	null	0.0099616	1.42e-18	2.02022
18	Positive	14.976	442.441	Unknown	[M+H]+	null	null	null	null	0.0044633	2.15e-18	2.08039
19	Positive	9.266	766.058	Unknown	[M+H]+	null	null	null	null	0.00031386	2.15e-18	2.09957
20	Positive	13.582	398.271	no MS2: Phytosphingosine-1-P	[M+H]+	C18H40NO6P	Phosphosphingolipids	AYGOSKULTISFCW-KZNAEPCWSA-N	CCCCCCCCCCCCCC[C@H]([C@@H]([C@@H](COP(=O)(O)O)N)O)O	0.014182	2.46e-18	2.07189
21	Positive	6.36	170.17	Unknown	[M+H]+	null	null	null	null	0.019975	4.66e-18	1.99778
22	Positive	8.912	324.248	low score: Melophlin B/C/G/K/L/N/O	[M+H]+	C19H33NO3	N-alkylpyrrolidines	WBPPODSRZVXVJK-MSUUIHNZSA-N	CCCCCCCCCCCC/C(O)=C(C1=O)\C(C(N1C)C)=O	0.023894	5.57e-18	1.97165
23	Positive	12.354	464.415	Unknown	[M+H]+	null	null	null	null	0.0051768	7.09e-18	2.0417
24	Positive	13.588	464.413	Unknown	[M+H]+	null	null	null	null	0.0039662	7.83e-18	2.04772
25	Positive	0.702	332.311	Unknown	[M+H]+	null	null	null	null	0.051605	1.09e-17	1.96171
26	Positive	0.532	325.249	low score: allo-Protolichesterinic acid	[M+H]+	C19H32O4	Gamma butyrolactones	WZYZDHVPSZCEEP-IRXDYDNUSA-N	CCCCCCCCCCCCC[C@@H]1OC(=O)C(=C)[C@@H]1C(=O)O	0.037127	1.54e-17	2.03952
27	Positive	16.724	464.413	Unknown	[M+H]+	null	null	null	null	0.0030396	1.77e-17	2.09561
28	Positive	16.058	708.627	Unknown	[M+H]+	null	null	null	null	0.0043423	1.77e-17	2.06456
29	Positive	15.538	404.411	Unknown	[M+H]+	null	null	null	null	0.0014024	1.83e-17	2.00781
30	Positive	19.915	441.338	low score: NCGC00169592-02_C29H46O4_3aH-Cyclopenta[a]chrysene-3a-carboxylic acid, 1-acetyleicosahydro-9-hydroxy-5a,5b,8,8,11a-pentamethyl-, (1R,3aS,5aR,5bR,9S,11aR)-	[M-H2O+H]+	C29H46O4	Oxosteroids	RVMPLOSJMIQORE-XPDAHERZSA-N	CC(=O)[C@@H]1CC[C@@]2(CC[C@]3(C)C(CCC4[C@@]5(C)CC[C@H](O)C(C)(C)C5CC[C@@]34C)C12)C(O)=O	0.010746	2.05e-17	2.05554
31	Positive	12.026	287.243	low score: NCGC00179862-03_C20H32O2_1-Naphthalenecarboxaldehyde, decahydro-5-[(3E)-5-hydroxy-3-methyl-3-penten-1-yl]-1,4a-dimethyl-6-methylene-, (1R,4aR,5S)-	[M-H2O+H]+	C20H32O2	Diterpenoids	FSLWKIHHQUNBQK-LDGRNEMHSA-N	C\C(CC[C@H]1C(=C)CCC2[C@@](C)(CCC[C@]12C)C=O)=C/CO	0.065258	2.15e-17	1.97243
32	Positive	9.496	540.414	Unknown	[M+H]+	null	null	null	null	0.01838	2.49e-17	2.05587
33	Positive	10.86	582.467	Unknown	[M+H]+	null	null	null	null	0.004944	2.49e-17	1.98249
34	Positive	7.567	219.193	low score: Tributylphosphine oxide	[M+H]+	C12H27OP	Organophosphine oxides	MNZAKDODWSQONA-UHFFFAOYSA-N	CCCCP(=O)(CCCC)CCCC	0.089396	2.53e-17	2.00478
35	Positive	19.828	441.339	low score: NCGC00169592-02_C29H46O4_3aH-Cyclopenta[a]chrysene-3a-carboxylic acid, 1-acetyleicosahydro-9-hydroxy-5a,5b,8,8,11a-pentamethyl-, (1R,3aS,5aR,5bR,9S,11aR)-	[M-H2O+H]+	C29H46O4	Oxosteroids	RVMPLOSJMIQORE-XPDAHERZSA-N	CC(=O)[C@@H]1CC[C@@]2(CC[C@]3(C)C(CCC4[C@@]5(C)CC[C@H](O)C(C)(C)C5CC[C@@]34C)C12)C(O)=O	0.0090414	3.08e-17	2.03711
36	Positive	5.916	122.105	2,6-Xylidine	[M+H]+	C8H11N	m-Xylenes	UFFBMTHBGFGIHF-UHFFFAOYSA-N	Cc1cccc(c1N)C	6.8511	3.08e-17	1.99767
37	Positive	19.001	544.505	Unknown	[M+H]+	null	null	null	null	0.002196	3.08e-17	1.96354
38	Positive	7.063	875.213	Unknown	[M+H]+	null	null	null	null	0.0010503	3.08e-17	2.04176
39	Positive	12.536	430.425	Unknown	[M+H]+	null	null	null	null	0.012657	3.25e-17	1.98147
40	Positive	12.069	512.461	Unknown	[M+H]+	null	null	null	null	0.041644	4.05e-17	1.94284
41	Positive	7.865	339.293	low score: N-butyl-N-(1-(cyclohexylamino)-1-oxobutan-2-yl)-4-methylpentanamide	[M+H]+	C20H38N2O2	N-acyl amines	SKTZFCRNZMJIPZ-UHFFFAOYSA-N	CCCCN(C(=O)CCC(C)C)C(CC)C(=O)NC1CCCCC1	0.0034789	6.63e-17	1.94417
42	Positive	12.127	468.432	Unknown	[M+H]+	null	null	null	null	0.031604	1.02e-16	1.89696
43	Positive	0.759	304.275	Unknown	[M+H]+	null	null	null	null	0.026561	1.21e-16	1.98937
44	Positive	8.835	288.281	low score: C17-Sphinganine	[M+H]+	C17H37NO2	1,2-aminoalcohols	KFQUQCFJDMSIJF-UHFFFAOYSA-N	CCCCCCCCCCCCCCC(C(CO)N)O	0.0041635	1.24e-16	1.95504
45	Positive	16.935	402.393	Unknown	[M+H]+	null	null	null	null	0.016998	1.29e-16	1.94609
46	Positive	13.354	714.67	Unknown	[M+H]+	null	null	null	null	0.0022195	1.43e-16	1.837
47	Positive	0.792	141.968	Unknown	[M+H]+	null	null	null	null	14.387	1.56e-16	2.03123
48	Positive	17.623	518.5	Unknown	[M+H]+	null	null	null	null	0.0014917	1.56e-16	1.94571
49	Positive	9.113	324.244	low score: Melophlin B/C/G/K/L/N/O	[M+H]+	C19H33NO3	N-alkylpyrrolidines	WBPPODSRZVXVJK-MSUUIHNZSA-N	CCCCCCCCCCCC/C(O)=C(C1=O)\C(C(N1C)C)=O	0.027002	1.97e-16	1.98985
50	Positive	11.859	402.421	Unknown	[M+H]+	null	null	null	null	0.010686	2.06e-16	2.03236
51	Positive	8.842	612.287	no MS2: Benzoylmesaconine	[M+Na]+	C31H43NO10	Aconitane-type diterpenoid alkaloids	PULWZCUZNRVAHT-PUAFOYDXSA-N	O=C(OC1C2C3CC1(O)C(OC)C(O)C2(O)C4C(OC)C5C6(COC)CN(C)C4C35C(OC)CC6O)C=7C=CC=CC7	26.489	2.06e-16	1.98998
52	Positive	0.452	130.966	Unknown	[M+H]+	null	null	null	null	89.215	2.06e-16	1.92854
53	Positive	14.395	431.416	Unknown	[M+H]+	null	null	null	null	0.024452	2.24e-16	1.92135
54	Positive	8.779	523.411	Unknown	[M+H]+	null	null	null	null	0.011677	2.29e-16	1.89687
55	Positive	0.628	325.249	Unknown	[M+H]+	null	null	null	null	0.045092	2.36e-16	1.92236
56	Positive	7.102	970.888	Unknown	[M+H]+	null	null	null	null	0.0076653	2.36e-16	1.959
57	Positive	0.269	806.639	Unknown	[M+H]+	null	null	null	null	0.0062665	2.73e-16	2.04309
58	Positive	15.526	419.354	low score: "(3R,5S,7R,9S,10S,12S,13R,14S,17R)-17-((2R)-7-hydroxy-6-methylheptan-2-yl)-10,13-dimethylhexadecahydro-1H-cyclopenta[a]phenanthrene-3,7,12-triol"	[M-H2O+H]+	C27H48O4	Tetrahydroxy bile acids, alcohols and derivatives	XJZGNVBLVFOSKJ-XZULNKEGSA-N	C[C@H](CCCC(C)CO)[C@H]1CC[C@H]2[C@]([C@@H]3C[C@H](O)[C@@]21C)([H])[C@H](O)C[C@H]4[C@]3(C)CC[C@@H](O)C4	0.052769	3.38e-16	1.90758
59	Positive	10.568	163.09	Unknown	[M+H]+	null	null	null	null	0.019866	3.57e-16	1.9441
60	Positive	19.842	806.635	Unknown	[M+H]+	null	null	null	null	0.0017322	4.05e-16	2.05919
61	Positive	0.743	115.966	Unknown	[M+H]+	null	null	null	null	9.9218	4.18e-16	2.00486
62	Positive	7.916	228.217	Unknown	[M+H]+	null	null	null	null	0.043332	4.18e-16	1.99745
63	Positive	17.811	416.41	Unknown	[M+H]+	null	null	null	null	0.0045231	4.27e-16	1.96139
64	Positive	1.956	102.02	Unknown	[M+H]+	null	null	null	null	14.669	4.55e-16	1.83826
65	Positive	6.728	383.3	low score: Geranylgeranyl 1,4-hydroquinone	[M+H]+	C26H38O2	Diterpenoids	FIPAQYYZFDCRDD-FPFQZNTGSA-N	OC1=C(C/C=C(CC/C=C(C)/CC/C=C(C)/CC/C=C(C)\C)\C)C=C(O)C=C1	0.015556	4.78e-16	1.92844
66	Positive	14.955	384.382	Unknown	[M+H]+	null	null	null	null	0.015974	4.78e-16	1.95121
67	Positive	8.06	274.299	Unknown	[M+H]+	null	null	null	null	0.0087516	4.92e-16	1.95946
68	Positive	7.061	972.456	Unknown	[M+H]+	null	null	null	null	0.0036406	4.92e-16	1.88177
69	Positive	10.613	399.288	low score: Geranylgeranyl 1,4-hydroquinone	[M+H]+	C26H38O3	Diterpenoids	MYSSQNMFYDHCAT-FLPKSHQQSA-N	OC1=C(C/C=C(CC/C=C(C)/CC/C=C(C)/CC/C=C(C)\C)\C)C=C(O)C=C1O	0.12866	4.96e-16	1.95954
70	Positive	1.414	430.285	low score: Mifepristone	[M+H]+	C29H35NO2	Oxosteroids	VKHAHZOOUSRJNA-GCNJZUOMSA-N	CC#C[C@]1(O)CC[C@H]2[C@@H]3CCC4=CC(=O)CCC4=C3[C@H](C[C@]12C)C1=CC=C(C=C1)N(C)C	0.0034246	5.34e-16	2.03518
71	Positive	1.034	230.959	Unknown	[M+H]+	null	null	null	null	0.011072	6.45e-16	1.81524
72	Positive	8.772	558.344	low score: Dimethyl ketal of oxysporidinone_130004	[M+Na]+	C30H49NO7	Terpene glycosides	OKLOELQSMKXXGE-RCCKNPSSSA-N	OC1CC(OC)(OC)CCC1(O)C2=CN(C)C(C(C3OC(/C(C)=C/C(C)CC(C)CC)C(C)CC3)=C2O)=O	0.021276	6.62e-16	2.03079
73	Positive	8.025	421.348	Unknown	[M+H]+	null	null	null	null	0.0018766	7.49e-16	2.0111
74	Positive	13.084	464.408	Unknown	[M+H]+	null	null	null	null	0.010671	7.83e-16	2.00229
75	Positive	7.866	276.221	low score: Unknown (carbon number 14); PlaSMA ID-1291	[M+H]+	C14H29NO4	Unknown	null	null	0.0041561	7.83e-16	1.91003
76	Positive	7.101	970.784	Unknown	[M+H]+	null	null	null	null	0.0044653	8.17e-16	1.87675
77	Positive	1.036	232.955	Unknown	[M+H]+	null	null	null	null	0.015919	9e-16	1.84383
78	Positive	12.373	305.27	Unknown	[M+H]+	null	null	null	null	20.707	9.66e-16	1.88443
79	Positive	7.064	875.316	low score: NCGC00385098-01![8,8-dimethyl-9-(3-methylbut-2-enoyloxy)-2-oxo-9,10-dihydropyrano[2,3-f]chromen-10-yl] 3-methylbut-2-enoate [IIN-based on: CCMSLIB00000846416]	[2M+Na]+	C24H26O7	Angular pyranocoumarins	UHWIZIJICYWABA-UHFFFAOYSA-N	CC(C)=CC(=O)OC1C(OC(=O)C=C(C)C)C(C)(C)OC2=CC=C3C=CC(=O)OC3=C12	0.004902	9.66e-16	2.05879
80	Positive	13.354	376.377	Unknown	[M+H]+	null	null	null	null	0.0039209	9.85e-16	1.91515
81	Positive	0.725	287.248	low score: Unknown (carbon number 20); PlaSMA ID-1412	[M+H]+	C20H30O	Unknown	null	null	0.056198	1.02e-15	2.002
82	Positive	12.016	556.493	Unknown	[M+H]+	null	null	null	null	0.035259	1.02e-15	1.94629
83	Positive	18.979	516.471	Unknown	[M+H]+	null	null	null	null	0.01102	1.06e-15	1.87514
84	Positive	11.993	298.372	Unknown	[M+H]+	null	null	null	null	0.010938	1.07e-15	2.04969
85	Positive	9.104	325.252	low score: allo-Protolichesterinic acid	[M+H]+	C19H32O4	Gamma butyrolactones	WZYZDHVPSZCEEP-IRXDYDNUSA-N	CCCCCCCCCCCCC[C@@H]1OC(=O)C(=C)[C@@H]1C(=O)O	0.041621	1.07e-15	1.94924
86	Positive	7.277	274.299	Unknown	[M+H]+	null	null	null	null	0.0005862	1.11e-15	2.07671
87	Positive	10.767	325.258	Unknown	[M+H]+	null	null	null	null	0.10201	1.11e-15	1.9353
88	Positive	8.324	324.247	low score: Melophlin B/C/G/K/L/N/O	[M+H]+	C19H33NO3	N-alkylpyrrolidines	WBPPODSRZVXVJK-MSUUIHNZSA-N	CCCCCCCCCCCC/C(O)=C(C1=O)\C(C(N1C)C)=O	0.030343	1.11e-15	1.88002
89	Positive	13.444	464.414	Unknown	[M+H]+	null	null	null	null	0.0049565	1.11e-15	1.92364
90	Positive	0.559	148.147	Unknown	[M+H]+	null	null	null	null	0.20985	1.16e-15	1.90665
91	Positive	0.089	465.41	no MS2: hyperin	[M+H]+	C21H20O12	Flavonoid-3-O-glycosides	OVSQVDMCBVZWGM-DTGCRPNFSA-N	O=C1C(OC2OC(CO)C(O)C(O)C2O)=C(OC=3C=C(O)C=C(O)C13)C=4C=CC(O)=C(O)C4	0.0079916	1.47e-15	1.98163
92	Positive	7.104	970.34	low score: NCGC00385068-01!methyl 4-methoxy-2-[(2S,3R,4S,5S,6R)-3,4,5-trihydroxy-6-[[(2S,3R,4S,5R)-3,4,5-trihydroxyoxan-2-yl]oxymethyl]oxan-2-yl]oxybenzoate [IIN-based on: CCMSLIB00000848774]	[2M+NH4]+	C20H28O13	Phenolic glycosides	DZRVGBRAMLSZDQ-HSMQXHTESA-N	COC(=O)C1=CC=C(OC)C=C1O[C@@H]2O[C@H](CO[C@@H]3OC[C@@H](O)[C@H](O)[C@H]3O)[C@@H](O)[C@H](O)[C@H]2O	0.0068492	1.49e-15	1.94239
93	Positive	0.47	286.855	Unknown	[M+H]+	null	null	null	null	237.78	1.64e-15	1.89141
94	Positive	0.483	140.962	Unknown	[M+H]+	null	null	null	null	33.834	1.65e-15	1.8835
95	Positive	19.623	806.64	Unknown	[M+H]+	null	null	null	null	0.0015419	1.96e-15	2.01943
96	Positive	0.686	264.869	Unknown	[M+H]+	null	null	null	null	113.63	1.97e-15	1.99963
97	Positive	8.788	566.369	low score: "1,2-DIDECANOYL-SN-GLYCERO-3-PHOSPHOCHOLINE"	[M+H]+	C28H56NO8P	Phosphatidylcholines	MLKLDGSYMHFAOC-AREMUKBSSA-N	CCCCCCCCCC(=O)OC[C@H](COP(=O)([O-])OCC[N+](C)(C)C)OC(=O)CCCCCCCCC	0.027362	2.52e-15	1.98519
98	Positive	15.244	752.652	Unknown	[M+H]+	null	null	null	null	0.0093844	2.78e-15	2.01551
99	Positive	16.359	388.371	Unknown	[M+H]+	null	null	null	null	0.027961	2.86e-15	1.83273
100	Positive	0.677	158.014	Unknown	[M+H]+	null	null	null	null	76.091	3.16e-15	1.91633
101	Positive	0.143	806.642	Unknown	[M+H]+	null	null	null	null	0.0056413	3.18e-15	2.02188
102	Positive	17.78	518.494	Unknown	[M+H]+	null	null	null	null	0.00091826	3.6e-15	1.88265
103	Positive	0.649	102.02	Unknown	[M+H]+	null	null	null	null	61.914	3.73e-15	2.05316
104	Positive	6.679	356.223	low score: NCGC00384969-01_C22H31NO4_(5R)-3-({(1S,2R,4aS,6R,8aR)-1,6-Dimethyl-2-[(1E)-1-propen-1-yl]-1,2,4a,5,6,7,8,8a-octahydro-1-naphthalenyl}carbonyl)-4-hydroxy-5-(hydroxymethyl)-1-methyl-1,5-dihydro-2H-pyrrol-2-one	[M-H2O+H]+	C22H31NO4	Pyrrolines	YHKYFYCSTJGMID-JWROMMBDSA-N	C\C=C\[C@@H]1\C=C/[C@@H]2C[C@H](C)CC[C@H]2[C@]1(C)C(=O)/C3=C(O)/[C@@H](CO)N(C)C3=O	0.21678	3.74e-15	1.90063
105	Positive	19.515	806.64	Unknown	[M+H]+	null	null	null	null	0.0015512	3.84e-15	2.0795
106	Positive	8.024	393.313	Unknown	[M+H]+	null	null	null	null	0.0041015	3.92e-15	2.00323
107	Positive	12.028	332.305	low score: NCGC00385919-01_C20H34O_2-Penten-1-ol, 5-[(1S,4aS,8aS)-decahydro-5,5,8a-trimethyl-2-methylene-1-naphthalenyl]-3-methyl-, (2E)-	[M+ACN+H]+	C20H34O	Diterpenoids	NERNKRPBSOBEHC-PTNGSMBKSA-N	CC(/CCC1C(=C)CCC2C(C)(C)CCCC12C)=C/CO	0.019817	3.92e-15	1.96375
108	Positive	11.21	550.437	Unknown	[M+H]+	null	null	null	null	0.0045312	4.36e-15	1.85112
109	Positive	6.35	130.171	low score: Octylamine	[M+H]+	C8H19N	Monoalkylamines	IOQPZZOEVPZRBK-UHFFFAOYSA-N	CCCCCCCCN	0.031833	4.62e-15	1.96489
110	Positive	19.029	516.459	Unknown	[M+H]+	null	null	null	null	0.024484	4.88e-15	1.80003
111	Positive	19.411	823.582	Unknown	[M+H]+	null	null	null	null	0.016737	5.36e-15	1.90384
112	Positive	0.748	113.972	Unknown	[M+H]+	null	null	null	null	57.002	5.45e-15	1.85866
113	Positive	7.104	970.459	Unknown	[M+H]+	null	null	null	null	0.0070775	5.87e-15	1.95115
114	Positive	0.577	222.133	low score: Dihydrozeatin	[M+H]+	C10H15N5O	6-alkylaminopurines	XXFACTAYGKKOQB-UHFFFAOYSA-N	OCC(C)CCNC=1N=CNC2=NC=NC21	0.045501	6.02e-15	1.91653
115	Positive	1.417	170.17	Unknown	[M+H]+	null	null	null	null	0.01572	6.02e-15	1.93828
116	Positive	8.772	802.058	low score: (NAG)(NAM)-AqOA[3-NH2-SATA];(G-G)-(NAG)(NAM)-AqOA[3-NH2-SATA]	[M+3H]3+	C96H162N24O47	Polypeptides	QMVZTJWZCDWESW-UHFFFAOYSA-N	CC(=O)NC1C(OC2C(CO)OC(OC3C(CO)OC(OC4C(CO)OC(O)C(NC(C)=O)C4OC(C)C(=O)NC(C)C(=O)NC(CCC(=O)NC(CCCNC(=O)C(CO)NC(=O)C(C)NC(=O)C(NC(=O)C(C)N)C(C)O)C(=O)NC(C)C(=O)O)C(N)=O)C(NC(C)=O)C3O)C(NC(C)=O)C2OC(C)C(=O)NC(C)C(=O)NC(CCC(=O)NC(CCCNC(=O)C(CO)NC(=O)C(C)NC(=O)C(NC(=O)C(C)N)C(C)O)C(=O)NC(C)C(=O)O)C(N)=O)OC(CO)C(O)C1O	0.0012474	6.45e-15	1.89371
117	Positive	8.77	542.372	low score: NCGC00381175-01!3-hydroxy-2-[[3-[3-(3-hydroxy-6-methylheptanoyl)oxy-6-methylheptanoyl]oxy-8-methylnonanoyl]amino]propanoic acid [IIN-based on: CCMSLIB00000848442]	[M-H2O+H]+	C29H53NO9	N-acyl-alpha amino acids	MWZPHNZNPKKSEI-UHFFFAOYSA-N	CC(C)CCCCC(CC(=O)NC(CO)C(O)=O)OC(=O)CC(CCC(C)C)OC(=O)CC(O)CCC(C)C	0.020483	6.64e-15	1.89757
118	Positive	15.495	782.639	Unknown	[M+H]+	null	null	null	null	0.012004	6.75e-15	1.86081
119	Positive	7.356	244.211	low score: Phencyclidine	[M+H]+	C17H25N	Aralkylamines	JTJMJGYZQZDUJJ-UHFFFAOYSA-N	C1CCC(CC1)(C2=CC=CC=C2)N3CCCCC3	0.053136	7.62e-15	1.77214
120	Positive	15.614	464.417	Unknown	[M+H]+	null	null	null	null	0.0060278	8.72e-15	1.98245
121	Positive	7.101	970.568	Unknown	[M+H]+	null	null	null	null	0.0083605	8.8e-15	1.97075
122	Positive	12.17	424.4	Unknown	[M+H]+	null	null	null	null	0.0302	1.05e-14	1.7401
123	Positive	1.709	131.939	Unknown	[M+H]+	null	null	null	null	144.96	1.07e-14	1.87103
124	Positive	0.459	128.952	Unknown	[M+H]+	null	null	null	null	130.76	1.11e-14	1.85286
125	Positive	10.859	562.366	Unknown	[M+H]+	null	null	null	null	0.02092	1.14e-14	1.98483
126	Positive	0.85	287.242	low score: NCGC00180707-03_C20H32O2_1(4H)-Naphthalenone, 4a,5,6,7,8,8a-hexahydro-4-[(3R)-3-hydroxy-3-methyl-4-penten-1-yl]-3,4a,8,8-tetramethyl-, (4S,4aR,8aS)-	[M-H2O+H]+	C20H32O2	Diterpenoids	SGKBPTZDIUXCMW-LWCVALJOSA-N	C\C1=C\C(=O)[C@H]2C(C)(C)CCC[C@]2(C)[C@H]1CC[C@@](C)(O)C=C	0.061377	1.14e-14	1.89638
127	Positive	7.31	318.323	Unknown	[M+H]+	null	null	null	null	0.011804	1.22e-14	1.83595
128	Positive	12.208	380.372	Unknown	[M+H]+	null	null	null	null	0.031831	1.22e-14	1.74768
129	Positive	6.626	312.194	low score: Dienogest	[M+H]+	C20H25NO2	Oxosteroids	AZFLJNIPTRTECV-FUMNGEBKSA-N	C[C@]12CCC3=C4CCC(=O)C=C4CC[C@H]3[C@@H]1CC[C@]2(CC#N)O	0.13543	1.26e-14	1.77025
130	Positive	19.329	806.642	Unknown	[M+H]+	null	null	null	null	0.0012471	1.26e-14	2.02003
131	Positive	0.133	488.431	Unknown	[M+H]+	null	null	null	null	0.012191	1.28e-14	1.94368
132	Positive	1.021	244.978	Unknown	[M+H]+	null	null	null	null	0.0066556	1.28e-14	1.83016
133	Positive	15.51	739.671	low score: (2E,6E)-3,7,11,15,19,23,27,31,35-nonamethylhexatriaconta-2,6,34-triene-1,11,15,19,23,27,31-heptol	[M+H]+	C45H86O7	Polyprenols	FPJJIWCMASJCHO-NXRGQNTBSA-N	OCC=C(C)CCC=C(C)CCCC(O)(C)CCCC(O)(C)CCCC(O)(C)CCCC(O)(C)CCCC(O)(C)CCCC(O)(C)CCC=C(C)C	0.0019095	1.37e-14	1.8725
134	Positive	13.758	312.387	Unknown	[M+H]+	null	null	null	null	0.028423	1.67e-14	1.77334
135	Positive	8.809	602.445	Unknown	[M+H]+	null	null	null	null	0.029638	1.7e-14	1.83791
136	Positive	9.257	478.366	low score: "((4R)-4-((3R,5S,7R,9S,10S,13R,14S,17R)-3,7-dihydroxy-10,13-dimethylhexadecahydro-1H-cyclopenta[a]phenanthren-17-yl)-2,2-dimethylpentanoyl)glycine"	[M+H]+	C28H47NO5	Glycinated bile acids and derivatives	HQPHGZUTNNVZLH-BOWXQMHNSA-N	[H][C@@]12[C@@H](O)C[C@@H]3C[C@H](O)CC[C@]3(C)[C@H]1CC[C@@]4(C)[C@H]2CC[C@@H]4[C@@H](CC(C)(C)C(NCC(O)=O)=O)C	0.039899	1.72e-14	1.85306
137	Positive	19.452	807.642	Unknown	[M+H]+	null	null	null	null	0.0018435	1.74e-14	1.98679
138	Positive	7.061	972.685	Unknown	[M+H]+	null	null	null	null	0.0049113	1.74e-14	1.92304
139	Positive	11.708	402.428	Unknown	[M+H]+	null	null	null	null	0.0025335	1.85e-14	1.91503
140	Positive	15.518	381.33	Unknown	[M+H]+	null	null	null	null	0.0010825	2.03e-14	1.85211
141	Positive	1.029	172.992	no MS2: Tartaric acid	[M+Na]+	C4H6O6	Sugar acids and derivatives	FEWJPZIEWOKRBE-UHFFFAOYSA-N	O=C(O)C(O)C(O)C(=O)O	0.11959	2.03e-14	1.8224
142	Positive	7.067	972.569	Unknown	[M+H]+	null	null	null	null	0.0039407	2.03e-14	1.94142
143	Positive	11.047	325.248	low score: GLYCEROL-MYRISTATE	[M+Na]+	C17H34O4	1-monoacylglycerols	DCBSHORRWZKAKO-UHFFFAOYSA-N	CCCCCCCCCCCCCC(=O)OCC(CO)O	0.02892	2.13e-14	1.94608
144	Positive	6.116	771.346	Unknown	[M+H]+	null	null	null	null	21.359	2.16e-14	1.83014
145	Positive	0.743	116.98	Unknown	[M+H]+	null	null	null	null	14.037	2.2e-14	1.71929
146	Positive	16.346	784.655	Unknown	[M+H]+	null	null	null	null	0.0072314	2.21e-14	1.94354
147	Positive	18.922	544.497	Unknown	[M+H]+	null	null	null	null	0.0030156	2.26e-14	1.9076
148	Positive	12.225	364.375	Unknown	[M+H]+	null	null	null	null	0.021131	2.26e-14	1.88899
149	Positive	0.502	137.973	Unknown	[M+H]+	null	null	null	null	4.0002	2.26e-14	1.8667
150	Positive	0.515	314.85	Unknown	[M+H]+	null	null	null	null	82.797	2.27e-14	1.9499
151	Positive	0.64	262.873	Unknown	[M+H]+	null	null	null	null	78.649	2.33e-14	1.96272
152	Positive	8.837	558.333	low score: Dimethyl ketal of oxysporidinone_130004	[M+Na]+	C30H49NO7	Terpene glycosides	OKLOELQSMKXXGE-RCCKNPSSSA-N	OC1CC(OC)(OC)CCC1(O)C2=CN(C)C(C(C3OC(/C(C)=C/C(C)CC(C)CC)C(C)CC3)=C2O)=O	0.038366	2.48e-14	1.98973
153	Positive	9.523	325.251	low score: GLYCEROL-MYRISTATE	[M+Na]+	C17H34O4	1-monoacylglycerols	DCBSHORRWZKAKO-UHFFFAOYSA-N	CCCCCCCCCCCCCC(=O)OCC(CO)O	0.03553	2.48e-14	1.92031
154	Positive	0.275	441.336	low score: NCGC00169592-02_C29H46O4_3aH-Cyclopenta[a]chrysene-3a-carboxylic acid, 1-acetyleicosahydro-9-hydroxy-5a,5b,8,8,11a-pentamethyl-, (1R,3aS,5aR,5bR,9S,11aR)-	[M-H2O+H]+	C29H46O4	Oxosteroids	RVMPLOSJMIQORE-XPDAHERZSA-N	CC(=O)[C@@H]1CC[C@@]2(CC[C@]3(C)C(CCC4[C@@]5(C)CC[C@H](O)C(C)(C)C5CC[C@@]34C)C12)C(O)=O	0.035483	2.51e-14	1.89795
155	Positive	15.985	782.635	Unknown	[M+H]+	null	null	null	null	0.015774	2.51e-14	1.87974
156	Positive	7.374	230.27	Unknown	[M+H]+	null	null	null	null	0.0016799	2.63e-14	2.02867
157	Positive	8.692	590.37	Unknown	[M+H]+	null	null	null	null	0.014288	2.65e-14	1.93808
158	Positive	10.572	388.248	low score: (1r,5R,7S)-5,7-diethyl-2-(1-ethyl-2-methyl-1H-indol-3-yl)-1,3-diazaadamantan-6-one	[M+Na]+	C23H31N3O	N-alkylindoles	KRYFHYSXWHRZKT-BRTIRZTQSA-N	O=C1C2(CN3CC1(CN(C2)C3C=4C=5C=CC=CC5N(C4C)CC)CC)CC	0.008448	2.7e-14	1.93739
159	Positive	0.426	114.965	Unknown	[M+H]+	null	null	null	null	71.098	2.73e-14	1.87838
160	Positive	10.565	365.17	low score: Magnoflorine	[M+Na]+	C20H24NO4	Aporphines	YLRXAIKMLINXQY-ZDUSSCGKSA-O	OC=1C(OC)=CC=C2C1C=3C(O)=C(OC)C=C4C3C(C2)[N+](C)(C)CC4	0.014055	2.75e-14	1.83434
161	Positive	8.699	626.437	Unknown	[M+H]+	null	null	null	null	0.028867	2.78e-14	1.90791
162	Positive	10.595	350.356	Unknown	[M+H]+	null	null	null	null	0.042215	2.78e-14	1.8386
163	Positive	10.413	356.385	Unknown	[M+H]+	null	null	null	null	0.0024404	2.86e-14	1.91772
164	Positive	15.087	359.35	Unknown	[M+H]+	null	null	null	null	0.0093093	2.86e-14	1.82655
165	Positive	15.301	752.653	Unknown	[M+H]+	null	null	null	null	0.014841	2.99e-14	1.96671
166	Positive	0.747	237.966	Unknown	[M+H]+	null	null	null	null	0.06402	3.02e-14	1.99724
167	Positive	9.655	544.403	Unknown	[M+H]+	null	null	null	null	0.015951	3.23e-14	1.97318
168	Positive	0.344	516.475	Unknown	[M+H]+	null	null	null	null	0.0023132	3.34e-14	1.76607
169	Positive	16.699	782.635	Unknown	[M+H]+	null	null	null	null	0.012267	3.36e-14	1.93959
170	Positive	12.039	336.353	Unknown	[M+H]+	null	null	null	null	0.051558	3.52e-14	1.89547
171	Positive	11.795	538.436	Unknown	[M+H]+	null	null	null	null	0.0059748	3.87e-14	1.87026
172	Positive	0.267	758.636	Unknown	[M+H]+	null	null	null	null	0.01287	4.08e-14	1.9995
173	Positive	7.358	432.277	low score: NCGC00381130-01!methyl (2E,8E)-9-[3a-hydroxy-6,7-dimethyl-1-(2-methylpropyl)-3-oxo-2,4,7,7a-tetrahydro-1H-isoindol-4-yl]-4,5-dihydroxy-8-methylnona-2,8-dienoate [IIN-based on: CCMSLIB00000846918]	[M-H2O+H]+	C25H39NO6	Bicyclic monoterpenoids	YUXUTEAAGHFKKH-MKQCFFQWSA-N	COC(=O)\\C=C\\C(O)C(O)CC\\C(C)=C\\C1C=C(C)C(C)C2C(CC(C)C)NC(=O)C12O	0.013144	4.12e-14	1.94828
174	Positive	16.79	664.595	Unknown	[M+H]+	null	null	null	null	0.010018	4.18e-14	2.00016
175	Positive	8.787	814.062	Unknown	[M+H]+	null	null	null	null	0.0041564	4.34e-14	1.90277
176	Positive	9.255	991.758	Unknown	[M+H]+	null	null	null	null	0.00052348	4.46e-14	1.96417
177	Positive	7.099	970.678	Unknown	[M+H]+	null	null	null	null	0.0088029	4.69e-14	1.79987
178	Positive	6.411	498.847	Unknown	[M+H]+	null	null	null	null	0.0039658	4.8e-14	1.80296
179	Positive	8.023	376.286	Unknown	[M+H]+	null	null	null	null	0.0076052	4.88e-14	1.94626
180	Positive	12.296	450.418	Unknown	[M+H]+	null	null	null	null	0.003112	4.93e-14	1.95143
181	Positive	7.065	972.234	Unknown	[M+H]+	null	null	null	null	0.0054176	4.98e-14	1.93675
182	Positive	15.517	742.688	Unknown	[M+H]+	null	null	null	null	0.0050988	5.01e-14	1.75391
183	Positive	10.854	506.4	Unknown	[M+H]+	null	null	null	null	0.041039	5.08e-14	1.837
184	Positive	12.216	408.407	Unknown	[M+H]+	null	null	null	null	0.03212	5.09e-14	1.73795
185	Positive	8.465	302.174	no MS2: octyltyrazolone	[M+H]+	C18H23NO3	Alpha amino acids and derivatives	LETLVQJZVBVGKT-SSZFMOIBSA-N	OC1=CC=C(/C=C2N=C(CCCCCCCC)OC\2=O)C=C1	0.1299	5.18e-14	1.84455
186	Positive	0.405	170.168	Unknown	[M+H]+	null	null	null	null	0.071533	5.2e-14	1.81317
187	Negative	0.078	197.799	Unknown	[M-H]-	null	null	null	null	0.044068	5.42e-14	1.96901
188	Positive	13.162	578.469	Unknown	[M+H]+	null	null	null	null	0.014276	5.43e-14	1.74797
189	Positive	1.7	133.935	Unknown	[M+H]+	null	null	null	null	71.203	5.59e-14	1.81871
190	Positive	8.51	302.333	Unknown	[M+H]+	null	null	null	null	0.00012249	5.71e-14	1.99171
191	Positive	14.139	540.494	Unknown	[M+H]+	null	null	null	null	0.047314	5.97e-14	1.69272
192	Positive	7.404	340.262	low score: ormosanine	[M+Na]+	C20H35N3	Ormosia-type alkaloids	YUKCLPPRYNXRAF-CPPNMTBBSA-N	N1CCCCC1C23CN4CCCCC4C(CC5CCCNC52)C3	0.052865	6.04e-14	1.86219
193	Positive	1.011	255.001	no MS2: (4S,5Z,6S)-4-(2-methoxy-2-oxoethyl)-5-[2-[(E)-3-phenylprop-2-enoyl]oxyethylidene]-6-[(2S,3R,4S,5S,6R)-3,4,5-trihydroxy-6-(hydroxymethyl)oxan-2-yl]oxy-4H-pyran-3-carboxylic acid	[M+K]+	C12H8O4	8-methoxypsoralens	QXKHYNVANLEOEG-UHFFFAOYSA-N	O=C1OC2=C(OC)C=3OC=CC3C=C2C=C1	0.011249	6.07e-14	1.7336
194	Positive	0.718	141.968	Unknown	[M+H]+	null	null	null	null	17.992	6.07e-14	1.81881
195	Positive	9.66	580.451	Unknown	[M+H]+	null	null	null	null	0.020169	6.29e-14	1.95777
196	Positive	8.541	346.364	Unknown	[M+H]+	null	null	null	null	0.0058429	6.72e-14	1.74047
197	Positive	7.866	234.206	Unknown	[M+H]+	null	null	null	null	0.037325	7.31e-14	1.81492
198	Positive	11.881	399.428	Unknown	[M+H]+	null	null	null	null	0.013495	7.42e-14	1.86386
199	Positive	0.43	117.968	Unknown	[M+H]+	null	null	null	null	68.15	7.65e-14	1.97801
200	Positive	9.836	572.422	Unknown	[M+H]+	null	null	null	null	0.022019	7.65e-14	1.95638
201	Positive	7.066	972.349	low score: (NAG)(NAM)-AemC	[M+H]+	C37H61N7O21S	Oligopeptides	JLDNMWCWVRSBND-UHFFFAOYSA-N	CC(=O)NC1C(OC2C(CO)OC(O)C(NC(C)=O)C2OC(C)C(=O)NC(C)C(=O)NC(CCC(=O)NC(CCCC(N)C(=O)O)C(=O)NC(CS)C(=O)O)C(=O)O)OC(CO)C(O)C1O	0.0071374	7.94e-14	1.87693
202	Positive	17.773	396.43	Unknown	[M+H]+	null	null	null	null	0.011508	8.46e-14	1.87243
203	Positive	11.889	336.354	Unknown	[M+H]+	null	null	null	null	0.027765	8.89e-14	1.70186
204	Positive	8.943	325.25	Unknown	[M+H]+	null	null	null	null	0.052169	8.94e-14	1.92583
205	Positive	9.272	546.404	Unknown	[M+H]+	null	null	null	null	0.015696	9.19e-14	1.87261
206	Positive	7.064	875.111	Unknown	[M+H]+	null	null	null	null	0.0052307	9.4e-14	1.85407
207	Positive	19.609	807.644	Unknown	[M+H]+	null	null	null	null	0.0050483	9.81e-14	1.95097
208	Positive	7.118	970.212	Unknown	[M+H]+	null	null	null	null	0.015694	9.83e-14	1.89777
209	Positive	1.81	102.021	Unknown	[M+H]+	null	null	null	null	11.504	1e-13	1.89907
210	Positive	13.352	331.315	low score: MMV687273	[M+H]+	C22H38N2	Monoterpenoids	JFIBVDBTCDTBRH-IDUWFGFVSA-N	C(=C(C)C)CCC(=CCNCCNC1C2CC3CC(C2)CC1C3)C	0.00079655	1e-13	1.85559
211	Positive	9.402	350.352	Unknown	[M+H]+	null	null	null	null	0.080242	1.02e-13	1.88015
212	Positive	1.542	503.373	Unknown	[M+H]+	null	null	null	null	0.008418	1.02e-13	1.74853
213	Positive	15.512	784.648	Unknown	[M+H]+	null	null	null	null	0.017919	1.02e-13	1.78839
214	Positive	8.697	566.613	Unknown	[M+H]+	null	null	null	null	0.023058	1.12e-13	1.85971
215	Positive	9.962	374.398	Unknown	[M+H]+	null	null	null	null	0.00085585	1.12e-13	1.76148
216	Positive	0.636	122.972	Unknown	[M+H]+	null	null	null	null	282.45	1.14e-13	1.79509
217	Positive	1.28	441.827	Unknown	[M+H]+	null	null	null	null	0.0051636	1.14e-13	1.81774
218	Positive	8.144	639.46	low score: Mogroside I E1	[M+H]+	C36H62O9	Cucurbitacin glycosides	LLZGAVAIPZROOJ-UHFFFAOYSA-N	OCC1OC(OC2CCC3C(=CCC4C3(C)C(O)CC5(C)C(CCC45C)C(C)CCC(O)C(O)(C)C)C2(C)C)C(O)C(O)C1O	0.013765	1.14e-13	1.77196
219	Positive	14.46	796.681	Unknown	[M+H]+	null	null	null	null	0.016236	1.22e-13	2.00136
220	Positive	1.331	297.094	low score: OCP_297.1002_16.5	[M+H]+	C14H17ClN2O3	Phenylpiperazines	FMKKWAHJJLLAOW-UHFFFAOYSA-N	OC(=O)CCC(=O)N1CCN(CC1)c1ccccc1Cl	10.558	1.23e-13	1.94831
221	Positive	17.695	490.462	Unknown	[M+H]+	null	null	null	null	0.010057	1.23e-13	1.84552
222	Positive	0.973	427.129	low score: Desoxyrhaponticin	[M+Na]+	C21H24O8	Stilbene glycosides	MFMQRDLLSRLUJY-DXKBKAGUSA-N	OC=1C=C(OC2OC(CO)C(O)C(O)C2O)C=C(C=CC3=CC=C(OC)C=C3)C1	0.062443	1.25e-13	1.81464
223	Positive	0.579	140.961	Unknown	[M+H]+	null	null	null	null	31.405	1.26e-13	1.65248
224	Positive	17.768	383.431	low score: 1-hexacosanol	[M+H]+	C26H54O	Fatty alcohols	IRHTZOCLLONTOC-UHFFFAOYSA-N	OCCCCCCCCCCCCCCCCCCCCCCCCCC	0.00027995	1.29e-13	1.99166
225	Positive	0.263	136.03	no MS2: 2-Benzoxazolinone; CE0; ASSKVPFEZFQQNQ-UHFFFAOYSA-N	[M+H]+	C7H5NO2	Benzoxazolones	ASSKVPFEZFQQNQ-UHFFFAOYSA-N	c1ccc2c(c1)nc(O)o2	3.5422	1.31e-13	1.7298
226	Positive	7.066	875.411	low score: Waikialoid A_130022	[M+H]+	C52H54N6O7	Indolocarbazoles	WZHCMAFZIFECCV-LYUUMHETSA-N	CC1(C)C=CC2=C3C(C([C@@]4([H])C5(N6)C(C[C@]7(N(CCC7)C5=O)C6=O)C8(C)C)([C@@](C9(N%104)C(C[C@@]%11(N(CCC%11)C9=O)C%10=O)C%12(C)C)([H])C%13=C%12NC%14=C(C=CC(C)(C)O%15)C%15=CC=C%14%13)C8=[N+]3[O-])=CC=C2O1	0.0069959	1.31e-13	1.86173
227	Positive	17.75	413.301	low score: 2-methyl-2-(3-pentadecylphenoxy)propanoic acid	[M+Na]+	C25H42O3	Phenoxyacetic acid derivatives	SQSAOEAQCNWNBE-UHFFFAOYSA-N	O=C(O)C(C)(C)OC1=CC(CCCCCCCCCCCCCCC)=CC=C1	0.039769	1.35e-13	1.68872
228	Positive	8.765	518.763	Unknown	[M+H]+	null	null	null	null	0.029038	1.36e-13	1.73699
229	Negative	0.077	195.802	Unknown	[M-H]-	null	null	null	null	0.045619	1.47e-13	1.93523
230	Positive	8.764	520.388	Unknown	[M+H]+	null	null	null	null	0.018343	1.53e-13	1.86383
231	Positive	14.536	796.682	Unknown	[M+H]+	null	null	null	null	0.013922	1.53e-13	2.00766
232	Positive	19.074	758.624	Unknown	[M+H]+	null	null	null	null	0.0047819	1.55e-13	1.99867
233	Positive	0.433	115.973	Unknown	[M+H]+	null	null	null	null	171.97	1.66e-13	1.9155
234	Positive	7.72	274.295	Unknown	[M+H]+	null	null	null	null	0.027072	1.66e-13	1.82913
235	Positive	8.181	512.376	Unknown	[M+H]+	null	null	null	null	0.044258	1.66e-13	1.80717
236	Positive	7.059	972.122	low score: 2-[(5S,25R,26R,29S,30S,31S)-13,14,15,18,19,20,31,35,36-nonahydroxy-2,10,23,28,32-pentaoxo-5-(3,4,5-trihydroxybenzoyloxy)-3,6,9,24,27,33-hexaoxaheptacyclo[28.7.1.0?,??.0?,??.0??,??.0??,??.0??,??]octatriaconta-1(38),11(16),12,14,17,19,21,34,36-nonaen-29-yl]acetic acid	[M+NH4]+	C41H30O27	Hydrolyzable tannins	HGJXAVROWQLCTP-YSNZXMJVSA-N	O=C(O)CC1C(=O)OC2C3OC(OC(=O)C4=CC(O)=C(O)C(O)=C4)C(OC(=O)C5=CC(O)=C(O)C=6OC(=O)C(O)C1C65)C2OC(=O)C7=CC(O)=C(O)C(O)=C7C=8C(O)=C(O)C(O)=CC8C(=O)OC3	0.0076619	1.83e-13	1.8325
237	Positive	17.801	441.333	no MS2: NCGC00169592-02_C29H46O4_3aH-Cyclopenta[a]chrysene-3a-carboxylic acid, 1-acetyleicosahydro-9-hydroxy-5a,5b,8,8,11a-pentamethyl-, (1R,3aS,5aR,5bR,9S,11aR)-	[M-H2O+H]+	C29H46O4	Oxosteroids	RVMPLOSJMIQORE-XPDAHERZSA-N	CC(=O)[C@@H]1CC[C@@]2(CC[C@]3(C)C(CCC4[C@@]5(C)CC[C@H](O)C(C)(C)C5CC[C@@]34C)C12)C(O)=O	0.053782	1.84e-13	1.86926
238	Positive	6.096	206.103	no MS2: 1-phenylisoquinoline	[M+H]+	C15H11N	Phenylpyridines	LPCWDYWZIWDTCV-UHFFFAOYSA-N	C12=CC=CC=C1C=CN=C2C3=CC=CC=C3	0.26595	2.01e-13	1.77477
239	Positive	7.087	973.013	Unknown	[M+H]+	null	null	null	null	0.006278	2.01e-13	1.8722
240	Positive	0.428	292.868	Unknown	[M+H]+	null	null	null	null	87.405	2.09e-13	1.99325
241	Positive	11.222	552.437	Unknown	[M+H]+	null	null	null	null	0.05274	2.09e-13	1.76402
242	Positive	18.578	782.637	Unknown	[M+H]+	null	null	null	null	0.006781	2.09e-13	1.94249
243	Positive	9.65	520.762	Unknown	[M+H]+	null	null	null	null	0.049003	2.27e-13	1.71221
244	Positive	9.951	330.368	Unknown	[M+H]+	null	null	null	null	9.45e-05	2.35e-13	2.00863
245	Positive	0.486	342.929	Unknown	[M+H]+	null	null	null	null	0.034054	2.35e-13	1.88886
246	Positive	1.37	583.431	low score: Diadinochrome	[M+H]+	C40H54O3	Triterpenoids	USOIUYXBYYVLLZ-PMBXBIOBSA-N	CC1=C(C(C[C@@H](C1)O)(C)C)C#C/C(=C/C=C/C(=C/C=C/C=C(\C)/C=C/C=C(\C)/[C@@H]2C=C3[C@](O2)(C[C@H](CC3(C)C)O)C)/C)/C	0.0024981	2.48e-13	1.76813
247	Positive	13.352	353.298	Unknown	[M+H]+	null	null	null	null	0.00092377	2.51e-13	1.83353
248	Positive	9.53	380.38	Unknown	[M+H]+	null	null	null	null	0.033406	2.54e-13	1.76757
249	Positive	0.428	143.969	Unknown	[M+H]+	null	null	null	null	160.15	2.6e-13	1.87307
250	Positive	6.954	228.217	Unknown	[M+H]+	null	null	null	null	0.030102	2.6e-13	1.84426
251	Positive	8.976	302.33	Unknown	[M+H]+	null	null	null	null	0.010816	2.7e-13	1.8998
252	Positive	14.276	452.435	Unknown	[M+H]+	null	null	null	null	0.05433	2.73e-13	1.60492
253	Positive	7.117	970.994	Unknown	[M+H]+	null	null	null	null	0.0062495	2.85e-13	1.85815
254	Positive	13.79	402.396	Unknown	[M+H]+	null	null	null	null	0.025662	2.97e-13	1.89075
255	Positive	0.701	190.946	Unknown	[M+H]+	null	null	null	null	79.559	2.97e-13	1.79898
256	Positive	14.91	782.639	Unknown	[M+H]+	null	null	null	null	0.017868	3e-13	1.73708
257	Positive	8.775	544.387	Unknown	[M+H]+	null	null	null	null	0.020677	3.07e-13	1.75648
258	Positive	0.321	488.436	Unknown	[M+H]+	null	null	null	null	0.011389	3.1e-13	1.82176
259	Positive	13.352	348.343	Unknown	[M+H]+	null	null	null	null	0.0026259	3.2e-13	1.81264
260	Positive	19.215	806.629	Unknown	[M+H]+	null	null	null	null	0.0025355	3.2e-13	2.00349
261	Positive	18.638	701.618	Unknown	[M+H]+	null	null	null	null	0.021494	3.26e-13	1.91815
262	Positive	10.064	548.412	Unknown	[M+H]+	null	null	null	null	0.02601	3.26e-13	1.8017
263	Positive	6.475	325.249	Unknown	[M+H]+	null	null	null	null	0.068832	3.38e-13	1.75831
264	Positive	8.027	449.39	low score: Taraxasterol	[M+Na]+	C30H50O	Triterpenoids	XWMMEBCFHUKHEX-ZJJHUPNDSA-N	OC1CCC2(C)C(CCC3(C)C2CCC4C5C(C(=C)CCC5(C)CCC43C)C)C1(C)C	0.032081	3.38e-13	1.82001
265	Positive	15.518	359.349	Unknown	[M+H]+	null	null	null	null	0.00022599	3.58e-13	1.79353
266	Positive	11.798	329.294	Unknown	[M+H]+	null	null	null	null	0.034126	3.58e-13	1.75487
267	Positive	8.583	482.367	Unknown	[M+H]+	null	null	null	null	0.022413	3.61e-13	1.77863
268	Positive	10.382	452.361	Unknown	[M+H]+	null	null	null	null	0.034728	3.62e-13	1.78913
269	Positive	0.178	398.27	no MS2: Phytosphingosine-1-P	[M+H]+	C18H40NO6P	Phosphosphingolipids	AYGOSKULTISFCW-KZNAEPCWSA-N	CCCCCCCCCCCCCC[C@H]([C@@H]([C@@H](COP(=O)(O)O)N)O)O	0.04193	3.67e-13	1.84223
270	Positive	0.154	516.46	Unknown	[M+H]+	null	null	null	null	0.0072966	3.7e-13	1.726
271	Positive	17.424	620.555	Unknown	[M+H]+	null	null	null	null	0.010631	3.73e-13	1.95283
272	Positive	13.349	683.606	Unknown	[M+H]+	null	null	null	null	0.0010156	3.77e-13	1.82777
273	Positive	7.359	387.218	low score: Sufentanil	[M+H]+	C22H30N2O2S	Anilides	GGCSSNBKKAUURC-UHFFFAOYSA-N	[H]C([H])([H])OC([H])([H])C(N(C(=O)C([H])([H])C([H])([H])[H])c(c([H])3)c([H])c([H])c([H])c([H])3)(C([H])([H])1)C([H])([H])C([H])([H])N(C([H])([H])C([H])([H])c(s2)c([H])c([H])c([H])2)C([H])([H])1	0.022274	3.84e-13	1.9351
274	Positive	11.959	600.52	Unknown	[M+H]+	null	null	null	null	0.058711	3.87e-13	1.84461
275	Positive	1.06	774.82	Unknown	[M+H]+	null	null	null	null	8.3272	3.87e-13	1.68618
276	Positive	13.35	313.303	low score: arachidic acid_64.0%	[M+H]+	C20H40O2	Long-chain fatty acids	VKOBVWXKNCXXDE-UHFFFAOYSA-N	CCCCCCCCCCCCCCCCCCCC(=O)O	0.002542	3.95e-13	1.82288
277	Positive	9.038	241.197	low score: h_14_19_norandrosterone	[M-2H2O+H]+	C18H28O2	Estrogens and derivatives	UOUIARGWRPHDBX-CQZDKXCPSA-N	O[C@@H]1CC[C@@]2([H])[C@](CC[C@]3([H])[C@]2([H])CC[C@@]4(C)[C@@]3([H])CCC4=O)([H])C1	0.096888	3.95e-13	1.75257
278	Negative	0.077	199.796	Unknown	[M-H]-	null	null	null	null	0.037871	4.05e-13	1.98654
279	Positive	0.704	192.935	Unknown	[M+H]+	null	null	null	null	55.1	4.27e-13	1.91043
280	Positive	13.417	376.366	Unknown	[M+H]+	null	null	null	null	0.011903	4.29e-13	1.8452
281	Positive	13.026	456.328	low score: glycolithocholic acid	[M+Na]+	C26H43NO4	Glycinated bile acids and derivatives	XBSQTYHEGZTYJE-REPOFGKESA-N	C[C@H](CCC(=O)NCC(=O)O)[C@H]1CC[C@@H]2[C@@]1(CC[C@H]3[C@H]2CC[C@H]4[C@@]3(CC[C@H](C4)O)C)C	0.020454	4.42e-13	1.86326
282	Positive	16.699	516.471	Unknown	[M+H]+	null	null	null	null	0.016064	4.51e-13	1.92274
283	Positive	11.916	644.552	Unknown	[M+H]+	null	null	null	null	0.036109	4.51e-13	1.80939
284	Positive	8.677	478.335	low score: N-(4-((6aR,8aS)-4-hydroxy-6a,8a,9-trimethyl-3,4,5,6,6a,6b,7,8,8a,8b,11a,12,12a,12b-tetradecahydro-1H-naphtho[2',1':4,5]indeno[2,1-b]furan-10-yl)-2-methylbutyl)acetamide	[M+Na]+	C29H45NO3	Furostanes and derivatives	CNHACNVJEKRLHF-UDCIVARJSA-N	O=C(NCC(C)CCC=1OC2CC3C4CC=C5CC(O)CCC5(C)C4CCC3(C)C2C1C)C	0.044644	4.55e-13	1.83001
285	Positive	8.348	288.279	low score: C17-Sphinganine	[M+H]+	C17H37NO2	1,2-aminoalcohols	KFQUQCFJDMSIJF-UHFFFAOYSA-N	CCCCCCCCCCCCCCC(C(CO)N)O	0.029026	4.78e-13	1.75183
286	Positive	0.568	379.815	Unknown	[M+H]+	null	null	null	null	71.263	5e-13	1.81417
287	Positive	1.25	120.08	no MS2: Indoline	[M+H]+	C8H9N	Indolines	LPAGFVYQRIESJQ-UHFFFAOYSA-N	C1CC2=CC=CC=C2N1	8.4659	5.03e-13	1.92788
288	Positive	9.364	304.322	Unknown	[M+H]+	null	null	null	null	0.060353	5.09e-13	1.74432
289	Positive	11.412	510.436	Unknown	[M+H]+	null	null	null	null	0.021039	5.34e-13	1.85914
290	Positive	8.619	258.303	Unknown	[M+H]+	null	null	null	null	0.00057502	5.41e-13	1.9276
291	Positive	19.259	807.64	Unknown	[M+H]+	null	null	null	null	0.0042592	5.49e-13	1.96918
292	Positive	12.822	552.449	Unknown	[M+H]+	null	null	null	null	0.011305	5.52e-13	1.85997
293	Positive	13.373	714.648	Unknown	[M+H]+	null	null	null	null	0.026815	5.73e-13	1.7643
294	Positive	13.303	578.463	Unknown	[M+H]+	null	null	null	null	0.027866	6.26e-13	1.8032
295	Positive	9.435	570.392	low score: "(4R)-4-((3R,5S,7R,9S,10S,13R,14S,17R)-3,7-dihydroxy-10,13-dimethylhexadecahydro-1H-cyclopenta[a]phenanthren-17-yl)-N-methyl-N-((2S,3R,4R,5R)-2,3,4,5,6-pentahydroxyhexyl)pentanamide"	[M+H]+	C31H55NO8	Dihydroxy bile acids, alcohols and derivatives	KUXSAFRZQPYINU-SGWAQUIASA-N	C[C@H](CCC(N(C)C[C@H](O)[C@@H](O)[C@@H]([C@@H](CO)O)O)=O)[C@H]1CC[C@H]2[C@]3([H])[C@H](O)C[C@@H]4C[C@H](O)CC[C@]4(C)[C@H]3CC[C@@]21C	0.022624	6.35e-13	1.81235
296	Positive	6.016	284.207	low score: Unknown (carbon number 14); PlaSMA ID-1373	[M+H]+	C14H25N3O3	Unknown	null	null	2.5032	6.82e-13	1.71838
297	Positive	19.816	955.656	low score: (30E,34E)-2,6,10,14,18,22,26,30,34-nonamethyl-36-[(2R,3R,4S,5S,6R)-3,4,5-trihydroxy-6-(hydroxymethyl)oxan-2-yl]oxyhexatriaconta-2,30,34-triene-6,10,14,18,22,26,27-heptol	[M+K]+	C51H96O13	Polyterpenoids	MONOOAYGIBRELN-REQVTYDXSA-N	OCC1OC(OCC=C(C)CCC=C(C)CCC(O)C(O)(C)CCCC(O)(C)CCCC(O)(C)CCCC(O)(C)CCCC(O)(C)CCCC(O)(C)CCC=C(C)C)C(O)C(O)C1O	0.0033294	6.82e-13	1.80922
298	Positive	14.391	478.451	Unknown	[M+H]+	null	null	null	null	0.0069146	6.86e-13	1.74314
299	Positive	0.681	130.016	Unknown	[M+H]+	null	null	null	null	30.917	7.01e-13	1.81148
300	Positive	18.283	604.567	Unknown	[M+H]+	null	null	null	null	0.018024	7.63e-13	1.89591
301	Positive	13.018	443.33	low score: Paxisterol_120160	[M+H]+	C28H42O4	Ergostane steroids	WUKYEOQJBJKFPH-VHCNFDLSSA-N	O[C@H]1CC[C@@]2(C)[C@](C[C@H]3[C@]4(O3)[C@]2([H])CCC56[C@@]4([H])[C@H]7CC5[C@@](CCC(C(C)C)=C)(C)O[C@]6([H])O7)([H])C1	0.037649	7.67e-13	1.89218
302	Positive	13.349	686.634	Unknown	[M+H]+	null	null	null	null	0.0073177	7.69e-13	1.79376
303	Positive	14.39	450.418	Unknown	[M+H]+	null	null	null	null	0.0070883	7.86e-13	1.87915
304	Positive	10.285	548.41	Unknown	[M+H]+	null	null	null	null	0.094169	7.88e-13	1.7681
305	Positive	10.879	402.389	Unknown	[M+H]+	null	null	null	null	0.017915	7.98e-13	1.87937
306	Positive	7.068	972.789	Unknown	[M+H]+	null	null	null	null	0.0092132	8.02e-13	1.94403
307	Positive	13.417	686.622	Unknown	[M+H]+	null	null	null	null	0.01136	8.28e-13	1.76838
308	Positive	0.118	430.428	Unknown	[M+H]+	null	null	null	null	0.030744	8.34e-13	1.82372
309	Positive	1.474	574.34	low score: (3S,10R,13R)-10,13-dimethyl-17-octyl-2,3,4,7,8,9,10,11,12,13,14,15,16,17-tetradecahydro-1H-cyclopenta[a]phenanthren-3-yl (4-nitrophenyl) carbonate	[M+Na]+	C34H49NO5	Androstane steroids	AFNDTSIACJAGSO-ZNBDOVCMSA-N	O=C(OC1=CC=C(C=C1)[N+](=O)[O-])OC2CC3=CCC4C(CCC5(C)C(CCCCCCCC)CCC45)C3(C)CC2	0.009785	8.34e-13	1.74736
310	Positive	0.173	758.635	Unknown	[M+H]+	null	null	null	null	0.010863	8.53e-13	1.98861
311	Positive	14.213	496.466	Unknown	[M+H]+	null	null	null	null	0.035406	8.56e-13	1.68774
312	Positive	0.426	145.965	Unknown	[M+H]+	null	null	null	null	69.421	8.93e-13	1.81056
313	Positive	15.161	645.526	Unknown	[M+H]+	null	null	null	null	0.03412	9.8e-13	1.86773
314	Positive	14.539	782.638	Unknown	[M+H]+	null	null	null	null	0.02883	1.01e-12	1.75727
315	Positive	0.435	125.98	Unknown	[M+H]+	null	null	null	null	39.441	1.02e-12	1.77847
316	Positive	1.528	170.169	Unknown	[M+H]+	null	null	null	null	0.021026	1.03e-12	1.80396
317	Positive	15.518	341.336	low score: docosanoic acid	[M+H]+	C22H44O2	Very long-chain fatty acids	UKMSUNONTOPOIO-UHFFFAOYSA-N	O=C(O)CCCCCCCCCCCCCCCCCCCCC	0.0016705	1.13e-12	1.74497
318	Positive	9.662	482.406	Unknown	[M+H]+	null	null	null	null	0.023924	1.13e-12	1.72141
319	Positive	9.815	304.321	Unknown	[M+H]+	null	null	null	null	0.030492	1.14e-12	1.89462
320	Positive	15.518	376.378	Unknown	[M+H]+	null	null	null	null	0.00021695	1.21e-12	1.75852
321	Positive	13.504	379.275	low score: MAG	[M+Na]+	C21H40O4	1-monoacylglycerols	RZRNAYUHWVFMIP-KTKRTIGZSA-N	CCCCCCCC/C=C\CCCCCCCC(=O)OCC(CO)O	0.041082	1.22e-12	1.93489
322	Positive	12.605	352.343	Unknown	[M+H]+	null	null	null	null	0.089109	1.22e-12	1.7554
323	Positive	7.36	445.274	low score: Lovastatin hydroxy acid observed in lovastatin standard	[M+Na]+	C24H38O6	Medium-chain hydroxy acids and derivatives	QLJODMDSTUBWDW-BXMDZJJMSA-N	CCC(C)C(=O)OC1CC(C=C2C1C(C(C=C2)C)CCC(CC(CC(=O)O)O)O)C	0.035555	1.29e-12	1.83664
324	Positive	6.667	640.44	Unknown	[M+H]+	null	null	null	null	0.0044541	1.3e-12	1.72115
325	Positive	0.503	154.977	Unknown	[M+H]+	null	null	null	null	7.0568	1.31e-12	1.77315
326	Positive	1.371	389.289	low score: methyl 4-((10R,13R)-3-hydroxy-10,13-dimethyl-2,3,4,7,8,9,10,11,12,13,14,15,16,17-tetradecahydro-1H-cyclopenta[a]phenanthren-17-yl)pentanoate	[M+H]+	C25H40O3	Monohydroxy bile acids, alcohols and derivatives	IMNIZYXAQQBADI-JMYVHVBSSA-N	O=C(OC)CCC(C)C1CCC2C3CC=C4CC(O)CCC4(C)C3CCC12C	0.053133	1.34e-12	1.72423
327	Positive	18.755	758.639	Unknown	[M+H]+	null	null	null	null	0.0079417	1.35e-12	2.00927
328	Positive	11.253	428.412	Unknown	[M+H]+	null	null	null	null	0.051669	1.45e-12	1.86198
329	Positive	8.969	508.386	Unknown	[M+H]+	null	null	null	null	0.020312	1.52e-12	1.89265
330	Positive	10.862	546.4	Unknown	[M+H]+	null	null	null	null	0.035869	1.52e-12	1.80509
331	Positive	11.753	358.4	Unknown	[M+H]+	null	null	null	null	0.0002189	1.53e-12	1.91405
332	Positive	17.745	391.318	Octyl-3,5-di-tert-butyl-4-hydroxyhydrocinnamate	[M+H]+	C25H42O3	Fatty alcohol esters	CFXCGWWYIDZIMU-UHFFFAOYSA-N	CCCCCCCCOC(=O)CCC1=CC(=C(O)C(=C1)C(C)(C)C)C(C)(C)C	0.079073	1.57e-12	1.66219
333	Positive	9.078	436.381	Unknown	[M+H]+	null	null	null	null	0.03703	1.57e-12	1.69603
334	Negative	0.079	162.831	Unknown	[M-H]-	null	null	null	null	0.040894	1.58e-12	1.98162
335	Positive	0.754	106.999	Unknown	[M+H]+	null	null	null	null	37.026	1.6e-12	1.65543
336	Positive	9.223	568.38	Unknown	[M+H]+	null	null	null	null	0.065029	1.71e-12	1.66835
337	Positive	11.397	550.425	Unknown	[M+H]+	null	null	null	null	0.035719	1.74e-12	1.70072
338	Positive	8.774	542.686	Unknown	[M+H]+	null	null	null	null	0.038704	1.77e-12	1.72782
339	Positive	12.696	570.498	Unknown	[M+H]+	null	null	null	null	0.13589	1.77e-12	1.69057
340	Positive	0.62	116.986	Unknown	[M+H]+	null	null	null	null	25.687	1.85e-12	1.77579
341	Negative	0.079	160.835	Unknown	[M-H]-	null	null	null	null	0.040725	1.85e-12	1.96323
342	Positive	8.782	302.329	Unknown	[M+H]+	null	null	null	null	0.016458	2.03e-12	1.79105
343	Positive	11.371	552.44	Unknown	[M+H]+	null	null	null	null	0.020684	2.03e-12	1.71561
344	Positive	6.927	782.049	Unknown	[M+H]+	null	null	null	null	0.0073196	2.08e-12	1.68193
345	Positive	0.547	246.906	Unknown	[M+H]+	null	null	null	null	12.451	2.13e-12	1.66405
346	Positive	8.024	268.178	low score: brevicarine	[M+H]+	C17H21N3	Harmala alkaloids	OMGIBPZQATWNBX-UHFFFAOYSA-N	N=1C=C(C=2C=3C=CC=CC3NC2C1C)CCCCNC	0.037557	2.14e-12	1.84357
347	Positive	1.039	220.928	Unknown	[M+H]+	null	null	null	null	0.03788	2.2e-12	1.65523
348	Positive	12.455	352.347	Unknown	[M+H]+	null	null	null	null	0.018705	2.23e-12	1.72897
349	Positive	10.377	536.411	low score: NCGC00347555-02!2-(21-amino-3,20-dihydroxydocosan-2-yl)oxy-6-(hydroxymethyl)oxane-3,4,5-triol	[M+H]+	C28H57NO8	Fatty acyl glycosides of mono- and disaccharides	FZSYYVOKNJZJTF-UHFFFAOYSA-N	CC(N)C(O)CCCCCCCCCCCCCCCCC(O)C(C)OC1OC(CO)C(O)C(O)C1O	0.027344	2.25e-12	1.74518
350	Positive	0.074	419.346	no MS2: "(3R,5S,7R,9S,10S,12S,13R,14S,17R)-17-((2R)-7-hydroxy-6-methylheptan-2-yl)-10,13-dimethylhexadecahydro-1H-cyclopenta[a]phenanthrene-3,7,12-triol"	[M-H2O+H]+	C27H48O4	Tetrahydroxy bile acids, alcohols and derivatives	XJZGNVBLVFOSKJ-XZULNKEGSA-N	C[C@H](CCCC(C)CO)[C@H]1CC[C@H]2[C@]3([H])[C@H](O)C[C@@H]4C[C@H](O)CC[C@]4(C)[C@H]3C[C@H](O)[C@@]21C	0.070165	2.28e-12	1.85877
351	Positive	18.982	521.423	Unknown	[M+H]+	null	null	null	null	0.044781	2.3e-12	1.77201
352	Positive	13.353	691.592	Unknown	[M+H]+	null	null	null	null	0.011687	2.33e-12	1.69464
353	Positive	10.15	330.361	Unknown	[M+H]+	null	null	null	null	0.0010658	2.35e-12	1.92539
354	Positive	9.952	352.354	Unknown	[M+H]+	null	null	null	null	0.0039724	2.45e-12	1.86411
355	Positive	13.475	516.468	Unknown	[M+H]+	null	null	null	null	0.016577	2.45e-12	1.75359
356	Positive	9.987	538.424	Unknown	[M+H]+	null	null	null	null	0.037436	2.55e-12	1.85805
357	Positive	15.35	580.483	Unknown	[M+H]+	null	null	null	null	0.012789	2.6e-12	1.77517
358	Positive	15.086	341.331	low score: docosanoic acid	[M+H]+	C22H44O2	Very long-chain fatty acids	UKMSUNONTOPOIO-UHFFFAOYSA-N	O=C(O)CCCCCCCCCCCCCCCCCCCCC	0.040894	2.65e-12	1.77075
359	Positive	15.526	770.723	Unknown	[M+H]+	null	null	null	null	0.014874	2.69e-12	1.89512
360	Positive	7.521	290.291	Unknown	[M+H]+	null	null	null	null	0.082589	2.72e-12	1.62171
361	Positive	1.603	713.471	Unknown	[M+H]+	null	null	null	null	0.0087417	2.89e-12	1.7892
362	Positive	15.513	397.305	low score: Unknown (carbon number 27); PlaSMA ID-2179	[M+H]+	C27H40O2	Unknown	null	null	0.012472	3.02e-12	1.64434
363	Positive	10.115	286.338	Unknown	[M+H]+	null	null	null	null	0.0012941	3.06e-12	1.89665
364	Positive	8.31	318.307	low score: Phytosphingosine (not validated, isomer of 1696)	[M+H]+	C18H39NO3	1,3-aminoalcohols	AERBNCYCJBRYDG-UHFFFAOYSA-N	OCC(N)C(O)C(O)CCCCCCCCCCCCCC	0.032122	3.06e-12	1.82588
365	Positive	1.839	133.936	Unknown	[M+H]+	null	null	null	null	64.638	3.08e-12	1.77823
366	Positive	6.409	996.691	Unknown	[M+H]+	null	null	null	null	0.008544	3.16e-12	1.85345
367	Positive	12.51	433.242	low score: [2-hydroxy-3-phosphonooxypropyl] hexadecanoate	[M+2Na-H]+	C19H39O7P	1-acylglycerol-3-phosphates	YNDYKPRNFWPPFU-UHFFFAOYSA-N	CCCCCCCCCCCCCCCC(=O)OCC(COP(=O)(O)O)O	24.704	3.27e-12	1.73514
368	Positive	9.231	520.387	Unknown	[M+H]+	null	null	null	null	0.043302	3.3e-12	1.71661
369	Positive	11.51	325.26	Unknown	[M+H]+	null	null	null	null	0.044839	3.33e-12	1.70923
370	Positive	1.074	766.786	Unknown	[M+H]+	null	null	null	null	7.3822	3.42e-12	1.67895
371	Positive	15.296	580.483	Unknown	[M+H]+	null	null	null	null	0.013224	3.55e-12	1.75885
372	Positive	8.751	997.71	Unknown	[M+H]+	null	null	null	null	0.013363	3.55e-12	1.63869
373	Positive	1.37	389.623	Unknown	[M+H]+	null	null	null	null	0.0069802	3.57e-12	1.70283
374	Positive	15.087	381.326	Unknown	[M+H]+	null	null	null	null	0.029463	3.59e-12	1.88576
375	Positive	8.701	568.38	Unknown	[M+H]+	null	null	null	null	0.021524	3.6e-12	1.74621
376	Positive	14.393	433.389	low score: (6E,10E,14E,18E)-2,6,10,15,19,23-hexamethyl-2,6,10,14,18,22-tetracosahexaene	[M+Na]+	C30H50	Triterpenoids	YYGNTYWPHWGJRM-AAJYLUCBSA-N	C(=C(C)C)CCC(=CCCC(=CCCC=C(C)CCC=C(C)CCC=C(C)C)C)C	0.016418	3.6e-12	1.69901
377	Positive	12.93	346.307	low score: Macamide B	[M+H]+	C23H39NO	N-acyl amines	MLGPKWUKOQAAGI-UHFFFAOYSA-N	O=C(NCC=1C=CC=CC1)CCCCCCCCCCCCCCC	0.0019065	3.64e-12	1.90774
378	Positive	1.325	170.169	Unknown	[M+H]+	null	null	null	null	0.026182	3.64e-12	1.83165
379	Positive	10.573	343.186	low score: 9-phenyl-1-(2,4,6-trihydroxyphenyl)nonan-1-one	[M+H]+	C21H26O4	Alkyl-phenylketones	OOGZWXIAHJKVAH-UHFFFAOYSA-N	O=C(C=1C(O)=CC(O)=CC1O)CCCCCCCCC=2C=CC=CC2	0.033476	3.66e-12	1.84601
380	Positive	13.479	325.235	low score: GLYCEROL-MYRISTATE	[M+Na]+	C17H34O4	1-monoacylglycerols	DCBSHORRWZKAKO-UHFFFAOYSA-N	CCCCCCCCCCCCCC(=O)OCC(CO)O	0.023671	3.78e-12	1.96548
381	Positive	11.578	510.43	Unknown	[M+H]+	null	null	null	null	0.072531	3.84e-12	1.67222
382	Positive	8.784	578.445	low score: NCGC00384949-01!2-(hydroxymethyl)-6-(2,20,21-trihydroxydocosan-3-yloxy)oxane-3,4,5-triol	[M+ACN+H]+	C28H56O9	Fatty acyl glycosides of mono- and disaccharides	IKQSIKPOUMLPKK-UHFFFAOYSA-N	CC(O)C(O)CCCCCCCCCCCCCCCCC(OC1OC(CO)C(O)C(O)C1O)C(C)O	0.039984	3.94e-12	1.84343
383	Positive	11.904	358.395	Unknown	[M+H]+	null	null	null	null	0.00099603	4.02e-12	1.84254
384	Positive	1.035	458.977	Unknown	[M+H]+	null	null	null	null	0.051966	4.02e-12	1.67223
385	Positive	6.887	324.238	Unknown	[M+H]+	null	null	null	null	0.13682	4.02e-12	1.69821
386	Positive	12.294	387.34	Unknown	[M+H]+	null	null	null	null	0.017516	4.05e-12	1.82143
387	Positive	0.432	102.963	Unknown	[M+H]+	null	null	null	null	14.769	4.11e-12	1.79683
388	Positive	8.939	478.327	low score: N-(4-((6aR,8aS)-4-hydroxy-6a,8a,9-trimethyl-3,4,5,6,6a,6b,7,8,8a,8b,11a,12,12a,12b-tetradecahydro-1H-naphtho[2',1':4,5]indeno[2,1-b]furan-10-yl)-2-methylbutyl)acetamide	[M+Na]+	C29H45NO3	Furostanes and derivatives	CNHACNVJEKRLHF-UDCIVARJSA-N	O=C(NCC(C)CCC=1OC2CC3C4CC=C5CC(O)CCC5(C)C4CCC3(C)C2C1C)C	6.3115	4.12e-12	1.73584
389	Positive	12.29	422.385	Unknown	[M+H]+	null	null	null	null	0.044516	4.32e-12	1.85401
390	Positive	6.296	122.972	Unknown	[M+H]+	null	null	null	null	35.567	4.37e-12	1.605
391	Positive	9.661	544.377	Unknown	[M+H]+	null	null	null	null	0.03817	4.64e-12	1.73857
392	Positive	9.24	527.37	low score: Dehydropachymic acid	[M+H]+	C33H50O5	Triterpenoids	RWIALJIVPUCERT-DRCQUEPLSA-N	O=C(OC1CCC2(C3=CCC4(C)C(C(O)CC4(C3=CCC2C1(C)C)C)C(C(=O)O)CCC(=C)C(C)C)C)C	0.098177	4.64e-12	1.63374
393	Positive	9.1	317.146	no MS2: Loureirin B	[M+H]+	C18H20O5	Retro-dihydrochalcones	ZPFRAPVRYLGYEC-UHFFFAOYSA-N	O=C(C1=CC=C(O)C=C1)CCC=2C(OC)=CC(OC)=CC2OC	0.11145	4.68e-12	1.82135
394	Positive	9.246	755.055	Unknown	[M+H]+	null	null	null	null	0.005703	4.8e-12	1.86665
395	Positive	8.691	502.335	low score: (2R,3S,4S,5S,6R)-2-[[7-hydroxy-4-[(Z)-5-hydroxy-3-methylpent-3-enyl]-4a,8,8-trimethyl-3-methylidene-2,4,5,6,7,8a-hexahydro-1H-naphthalen-2-yl]oxy]-6-(hydroxymethyl)oxane-3,4,5-triol	[M+NH4]+	C26H44O8	Diterpene glycosides	JECOCDKQCZSANH-RFKAOMIISA-N	OCC=C(C)CCC1C(=C)C(OC2OC(CO)C(O)C(O)C2O)CC3C(C)(C)C(O)CCC13C	0.046594	5.14e-12	1.76091
396	Positive	18.891	759.642	Unknown	[M+H]+	null	null	null	null	0.011343	5.14e-12	1.92023
397	Positive	9.663	554.445	Unknown	[M+H]+	null	null	null	null	0.017179	5.44e-12	1.70301
398	Positive	15.515	808.656	Unknown	[M+H]+	null	null	null	null	0.018502	5.48e-12	1.96649
399	Positive	17.769	360.352	Unknown	[M+H]+	null	null	null	null	0.017886	5.52e-12	1.83444
400	Positive	11.926	380.381	Unknown	[M+H]+	null	null	null	null	0.01609	5.66e-12	1.71886
401	Positive	0.708	314.849	Unknown	[M+H]+	null	null	null	null	98.065	5.73e-12	1.8942
402	Positive	13.352	239.259	Unknown	[M+H]+	null	null	null	null	0.015522	5.79e-12	1.72889
403	Positive	0.739	233.873	Unknown	[M+H]+	null	null	null	null	44.693	5.82e-12	1.93423
404	Positive	12.402	304.326	Unknown	[M+H]+	null	null	null	null	0.087087	5.85e-12	1.59402
405	Positive	0.433	124.973	Unknown	[M+H]+	null	null	null	null	167.7	5.98e-12	1.79772
406	Positive	10.864	842.104	Unknown	[M+H]+	null	null	null	null	0.009533	5.98e-12	1.86357
407	Positive	11.753	380.383	Unknown	[M+H]+	null	null	null	null	0.0065526	6e-12	1.79329
408	Positive	1.133	257.997	Unknown	[M+H]+	null	null	null	null	0.03177	6.02e-12	1.75629
409	Positive	14.963	406.358	Unknown	[M+H]+	null	null	null	null	0.023037	6.23e-12	1.94092
410	Positive	13.435	357.332	low score: conessine	[M+H]+	C24H40N2	Conanine-type alkaloids	GPLGAQQQNWMVMM-CYFNKAHPSA-N	C1=C2CC(N(C)C)CCC2(C)C3CCC45CN(C)C(C)C5CCC4C3C1	0.035425	6.27e-12	1.8388
411	Positive	9.254	496.385	1-O-hexadecyl-2-C-methyl-3-phosphatidylcholine	[M+H]+	C25H54NO6P	Glycerophosphocholines	BZLKOORCGCYQJZ-UHFFFAOYSA-N	CCCCCCCCCCCCCCCCOCC(C)(COP(=O)([O-])OCC[N+](C)(C)C)O	0.031007	6.61e-12	1.76597
412	Positive	7.072	875.491	no MS2: NCGC00380190-01!3,15,21-tris[[(2R,3R,4S,5S,6R)-3,4,5-trihydroxy-6-(hydroxymethyl)oxan-2-yl]oxy]docosanoic acid	[M+H]+	C40H74O20	Rhamnolipids	ZPUOWQZPFGUNIS-JIKMCCCNSA-N	CC(CCCCCC(CCCCCCCCCCCC(CC(O)=O)O[C@@H]1O[C@H](CO)[C@@H](O)[C@H](O)[C@H]1O)O[C@@H]2O[C@H](CO)[C@@H](O)[C@H](O)[C@H]2O)O[C@@H]3O[C@H](CO)[C@@H](O)[C@H](O)[C@H]3O	0.018681	6.72e-12	1.73289
413	Positive	10.85	808.107	Unknown	[M+H]+	null	null	null	null	0.015297	6.73e-12	1.78057
414	Positive	9.613	546.394	Unknown	[M+H]+	null	null	null	null	0.047761	6.84e-12	1.83064
415	Positive	17.761	492.446	Unknown	[M+H]+	null	null	null	null	0.017131	6.86e-12	1.74294
416	Positive	17.517	620.564	Unknown	[M+H]+	null	null	null	null	0.017358	6.94e-12	1.88898
417	Positive	0.427	214.932	Unknown	[M+H]+	null	null	null	null	65.293	7.12e-12	1.76959
418	Positive	18.312	576.534	Unknown	[M+H]+	null	null	null	null	0.019762	7.88e-12	1.79855
419	Positive	7.521	230.265	Unknown	[M+H]+	null	null	null	null	0.020777	7.99e-12	1.79435
420	Positive	0.569	118.098	low score: betaine	[M+H]+	C5H11NO2	Alpha amino acids	KWIUHFFTVRNATP-UHFFFAOYSA-N	O=C([O-])C[N+](C)(C)C	0.14856	8.21e-12	1.82605
421	Positive	0.646	105.934	Unknown	[M+H]+	null	null	null	null	110.93	8.35e-12	1.58793
422	Positive	0.389	203.242	Unknown	[M+H]+	null	null	null	null	0.001102	8.41e-12	1.74364
423	Positive	10.272	399.286	low score: Geranylgeranyl 1,4-hydroquinone	[M+H]+	C26H38O3	Diterpenoids	MYSSQNMFYDHCAT-FLPKSHQQSA-N	OC1=C(C/C=C(CC/C=C(C)/CC/C=C(C)/CC/C=C(C)\C)\C)C=C(O)C=C1O	0.1806	8.5e-12	1.54439
424	Positive	12.329	468.444	Unknown	[M+H]+	null	null	null	null	0.11253	8.5e-12	1.68102
425	Positive	17.824	490.47	Unknown	[M+H]+	null	null	null	null	0.014983	8.53e-12	1.75547
426	Positive	0.51	324.241	low score: Melophlin B/C/G/K/L/N/O	[M+H]+	C19H33NO3	N-alkylpyrrolidines	WBPPODSRZVXVJK-MSUUIHNZSA-N	CCCCCCCCCCCC/C(O)=C(C1=O)\C(C(N1C)C)=O	0.084526	8.78e-12	1.70031
427	Positive	10.021	510.401	Unknown	[M+H]+	null	null	null	null	0.032093	8.78e-12	1.67264
428	Positive	0.685	114.975	Unknown	[M+H]+	null	null	null	null	5.6143	9.12e-12	1.77256
429	Positive	16.867	780.62	Unknown	[M+H]+	null	null	null	null	0.015577	9.4e-12	1.83704
430	Positive	13.791	374.361	low score: Conessine	[M+NH4]+	C24H40N2	Conanine-type alkaloids	GPLGAQQQNWMVMM-MYAJQUOBSA-N	C1=C2CC(N(C)C)CCC2(C)C3CCC45CN(C)C(C)C5CCC4C3C1	0.0036394	9.68e-12	1.84839
431	Positive	8.141	458.896	Unknown	[M+H]+	null	null	null	null	0.0063886	1e-11	1.70672
432	Positive	10.33	286.331	Unknown	[M+H]+	null	null	null	null	0.0097425	1.01e-11	1.82186
433	Positive	13.061	346.301	low score: Macamide B	[M+H]+	C23H39NO	N-acyl amines	MLGPKWUKOQAAGI-UHFFFAOYSA-N	O=C(NCC=1C=CC=CC1)CCCCCCCCCCCCCCC	0.028567	1.1e-11	1.91838
434	Positive	8.137	458.881	Unknown	[M+H]+	null	null	null	null	0.0035698	1.14e-11	1.68871
435	Positive	5.531	297.097	no MS2: OCP_297.1002_16.5	[M+H]+	C14H17ClN2O3	Phenylpiperazines	FMKKWAHJJLLAOW-UHFFFAOYSA-N	OC(=O)CCC(=O)N1CCN(CC1)c1ccccc1Cl	5.9268	1.14e-11	1.72175
436	Positive	14.941	419.344	no MS2: "(3R,5S,7R,9S,10S,12S,13R,14S,17R)-17-((2R)-7-hydroxy-6-methylheptan-2-yl)-10,13-dimethylhexadecahydro-1H-cyclopenta[a]phenanthrene-3,7,12-triol"	[M-H2O+H]+	C27H48O4	Tetrahydroxy bile acids, alcohols and derivatives	XJZGNVBLVFOSKJ-XZULNKEGSA-N	C[C@H](CCCC(C)CO)[C@H]1CC[C@H]2[C@]3([H])[C@H](O)C[C@@H]4C[C@H](O)CC[C@]4(C)[C@H]3C[C@H](O)[C@@]21C	0.12616	1.14e-11	1.43243
437	Positive	1.375	655.45	low score: Pseudoginsenoside RT5	[M+H]+	C36H62O10	Triterpene saponins	PSOUXXNNRFNUAY-JLXGCTMESA-N	OCC1OC(OC2CC3(C)C(CC(O)C4C(CCC43C)C5(OC(CC5)C(O)(C)C)C)C6(C)CCC(O)C(C)(C)C26)C(O)C(O)C1O	0.0098558	1.16e-11	1.67792
438	Positive	1.045	856.742	Unknown	[M+H]+	null	null	null	null	14.041	1.24e-11	1.65148
439	Positive	0.334	492.443	Unknown	[M+H]+	null	null	null	null	0.019047	1.25e-11	1.4973
440	Positive	10.311	365.169	low score: 7,8-Dihydroxy calonectrin	[M+Na]+	C19H26O8	Trichothecenes	JSKXQQKSUOVSKS-UHFFFAOYSA-N	CC1=CC2C(C(C1O)O)(C3(CC(C(C34CO4)O2)OC(=O)C)C)COC(=O)C	0.046475	1.3e-11	1.78443
441	Positive	14.551	784.653	Unknown	[M+H]+	null	null	null	null	0.043418	1.33e-11	1.58495
442	Positive	14.394	455.378	Unknown	[M+H]+	null	null	null	null	0.010913	1.35e-11	1.84217
443	Positive	1.034	938.76	Unknown	[M+H]+	null	null	null	null	16.636	1.38e-11	1.61115
444	Positive	0.744	262.874	Unknown	[M+H]+	null	null	null	null	50.448	1.45e-11	1.83622
445	Positive	14.544	419.346	no MS2: "(3R,5S,7R,9S,10S,12S,13R,14S,17R)-17-((2R)-7-hydroxy-6-methylheptan-2-yl)-10,13-dimethylhexadecahydro-1H-cyclopenta[a]phenanthrene-3,7,12-triol"	[M-H2O+H]+	C27H48O4	Tetrahydroxy bile acids, alcohols and derivatives	XJZGNVBLVFOSKJ-XZULNKEGSA-N	C[C@H](CCCC(C)CO)[C@H]1CC[C@H]2[C@]3([H])[C@H](O)C[C@@H]4C[C@H](O)CC[C@]4(C)[C@H]3C[C@H](O)[C@@]21C	0.1339	1.46e-11	1.57081
446	Positive	10.969	344.379	low score: DOCOSANOL	[M+NH4]+	C22H46O	Fatty alcohols	NOPFSRXAKWQILS-UHFFFAOYSA-N	OCCCCCCCCCCCCCCCCCCCCCC	0.0079727	1.46e-11	1.63384
447	Positive	0.621	154.978	Unknown	[M+H]+	null	null	null	null	5.0621	1.47e-11	1.69038
448	Positive	0.479	182.973	Unknown	[M+H]+	null	null	null	null	5.2862	1.48e-11	1.75781
449	Positive	0.432	126.976	Unknown	[M+H]+	null	null	null	null	108.34	1.49e-11	1.78302
450	Positive	9.274	554.445	low score: NCGC00384949-01!2-(hydroxymethyl)-6-(2,20,21-trihydroxydocosan-3-yloxy)oxane-3,4,5-triol	[M+NH4]+	C28H56O9	Fatty acyl glycosides of mono- and disaccharides	IKQSIKPOUMLPKK-UHFFFAOYSA-N	CC(O)C(O)CCCCCCCCCCCCCCCCC(OC1OC(CO)C(O)C(O)C1O)C(C)O	0.040989	1.49e-11	1.67111
451	Positive	0.429	220.883	Unknown	[M+H]+	null	null	null	null	141.14	1.53e-11	1.75716
452	Positive	13.513	407.304	low score: 5-[1,2,4a-trimethyl-5-(3-methylbutanoyloxymethyl)-2,3,4,7,8,8a-hexahydronaphthalen-1-yl]-3-methylpentanoic acid	[M+H]+	C25H42O4	Colensane and clerodane diterpenoids	FISIJWVRKFHLSM-UHFFFAOYSA-N	O=C(O)CC(C)CCC1(C)C(C)CCC2(C(=CCCC21)COC(=O)CC(C)C)C	0.026416	1.6e-11	1.87011
453	Positive	11.849	512.459	Unknown	[M+H]+	null	null	null	null	0.069	1.65e-11	1.48056
454	Positive	12.144	462.421	Unknown	[M+H]+	null	null	null	null	0.011488	1.65e-11	1.71262
455	Positive	13.352	369.273	low score: Dihydromuronic acid	[M+K]+	C21H36O5	Gamma butyrolactones	SPGPUDJMXMJNCU-JLAWEPINSA-N	CC(=O)CCCCCCCCCCCCC[C@@H]1C(C(C)C(=O)O1)C(=O)O	0.017517	1.65e-11	1.66239
456	Positive	10.858	522.797	Unknown	[M+H]+	null	null	null	null	0.03205	1.67e-11	1.69362
457	Positive	1.142	153.139	Unknown	[M+H]+	null	null	null	null	0.2291	1.7e-11	1.68299
458	Positive	0.064	806.625	Unknown	[M+H]+	null	null	null	null	0.017026	1.7e-11	1.77618
459	Positive	8.136	225.216	low score: N~1~,N~4~-bis(3-aminopropyl)-1,4-butanediamine	[M+Na]+	C10H26N4	Dialkylamines	PFNFFQXMRSDOHW-UHFFFAOYSA-N	NCCCNCCCCNCCCN	0.11027	1.71e-11	1.53578
460	Positive	8.11	956.617	Unknown	[M+H]+	null	null	null	null	0.0011576	1.73e-11	1.80558
461	Positive	14.46	122.105	no MS2: 2,6-Xylidine	[M+H]+	C8H11N	m-Xylenes	UFFBMTHBGFGIHF-UHFFFAOYSA-N	CC1=CC=CC(C)=C1N	14.551	1.86e-11	1.71275
462	Positive	0.583	104.016	Unknown	[M+H]+	null	null	null	null	55.579	1.89e-11	1.60121
463	Positive	0.522	295.878	Unknown	[M+H]+	null	null	null	null	7.4558	2e-11	1.70783
464	Positive	10.024	532.377	Unknown	[M+H]+	null	null	null	null	0.07955	2.08e-11	1.65731
465	Positive	8.129	413.955	Unknown	[M+H]+	null	null	null	null	0.0079045	2.08e-11	1.76565
466	Positive	12.3	427.342	low score: 5Alpha-Cholestanol	[M+K]+	C27H48O	Cholesterols and derivatives	QYIXCDOBOSTCEI-QCYZZNICSA-N	OC1CCC2(C)C(CCC3C4CCC(C(C)CCCC(C)C)C4(C)CCC32)C1	0.0108	2.08e-11	1.87024
467	Positive	6.499	122.972	Unknown	[M+H]+	null	null	null	null	27.302	2.12e-11	1.47396
468	Positive	9.662	518.368	Unknown	[M+H]+	null	null	null	null	0.079362	2.12e-11	1.80911
469	Positive	16.456	402.431	Unknown	[M+H]+	null	null	null	null	0.013599	2.12e-11	1.77735
470	Positive	17.773	697.719	Unknown	[M+H]+	null	null	null	null	0.018589	2.13e-11	1.73946
471	Positive	0.43	100.964	Unknown	[M+H]+	null	null	null	null	60.522	2.2e-11	1.64472
472	Positive	10.804	344.38	low score: DOCOSANOL	[M+NH4]+	C22H46O	Fatty alcohols	NOPFSRXAKWQILS-UHFFFAOYSA-N	OCCCCCCCCCCCCCCCCCCCCCC	0.0088105	2.28e-11	1.7679
473	Positive	13.014	233.139	low score: 3-(sec-butyl)-2-hydroxy-3H-benzo[e][1,4]diazepin-5(4H)-one	[M+H]+	C13H16N2O2	1,4-benzodiazepines	VKZICKDDJSFAAG-UHFFFAOYSA-N	O=C1NC(C(O)=NC=2C=CC=CC12)C(C)CC	0.054546	2.28e-11	1.69599
474	Positive	18.343	876.637	Unknown	[M+H]+	null	null	null	null	0.010994	2.37e-11	1.63174
475	Positive	9.065	570.407	low score: "(4R)-4-((3R,5S,7R,9S,10S,13R,14S,17R)-3,7-dihydroxy-10,13-dimethylhexadecahydro-1H-cyclopenta[a]phenanthren-17-yl)-N-methyl-N-((2S,3R,4R,5R)-2,3,4,5,6-pentahydroxyhexyl)pentanamide"	[M+H]+	C31H55NO8	Dihydroxy bile acids, alcohols and derivatives	KUXSAFRZQPYINU-SGWAQUIASA-N	C[C@H](CCC(N(C)C[C@H](O)[C@@H](O)[C@@H]([C@@H](CO)O)O)=O)[C@H]1CC[C@H]2[C@]3([H])[C@H](O)C[C@@H]4C[C@H](O)CC[C@]4(C)[C@H]3CC[C@@]21C	0.025012	2.49e-11	1.59593
476	Positive	8.746	826.046	Unknown	[M+H]+	null	null	null	null	0.010019	2.52e-11	1.65619
477	Positive	1.39	115.967	Unknown	[M+H]+	null	null	null	null	33.788	2.53e-11	1.71834
478	Positive	14.54	301.237	low score: Roccellic acid	[M+H]+	C17H32O4	Long-chain fatty acids	CADNMISJDLVPCK-UHFFFAOYSA-N	O=C(O)C(CCCCCCCCCCCC)C(C)C(=O)O	0.010917	2.59e-11	1.78826
479	Positive	9.268	534.345	low score: Orlistat	[M+K]+	C29H53NO5	Leucine and derivatives	AHLBNYSZXLDEJQ-FWEHEUNISA-N	CCCCCCCCCCC[C@H](OC([C@@H](NC=O)CC(C)C)=O)C[C@H]1[C@H](CCCCCC)C(O1)=O	0.069111	2.59e-11	1.75619
480	Positive	17.948	387.381	Unknown	[M+H]+	null	null	null	null	0.0052279	2.61e-11	1.58457
481	Positive	17.744	449.37	low score: (5aR,5bR)-3a,5a,5b,8,8,11a-hexamethyl-1-(prop-1-en-2-yl)icosahydro-1H-cyclopenta[a]chrysen-9-ol	[M+Na]+	C30H50O	Triterpenoids	MQYXUWHLBZFQQO-KZYZTIEESA-N	OC1CCC2(C)C(CCC3(C)C2CCC4C5C(C(=C)C)CCC5(C)CCC43C)C1(C)C	0.039999	2.65e-11	1.83095
482	Positive	1.055	860.737	Unknown	[M+H]+	null	null	null	null	11.21	2.74e-11	1.75947
483	Positive	6.112	372.258	low score: (2E,4E,12Z)-N-(2-methylpropyl)octadeca-2,4,12-trienamide	[M+K]+	C22H39NO	N-acyl amines	PCWWIOUZYOPZHT-VBUSEHTESA-N	OC(=NCC(C)C)C=CC=CCCCCCCC=CCCCCC	6.1673	2.75e-11	1.93473
484	Positive	12.376	245.249	low score: N1-Acetylspermine	[M+H]+	C12H28N4O	Acetamides	GUNURVWAJRRUAV-UHFFFAOYSA-N	NCCCNCCCCNCCCNC(C)=O	0.00982	2.77e-11	1.74196
485	Positive	13.791	357.332	low score: conessine	[M+H]+	C24H40N2	Conanine-type alkaloids	GPLGAQQQNWMVMM-CYFNKAHPSA-N	C1=C2CC(N(C)C)CCC2(C)C3CCC45CN(C)C(C)C5CCC4C3C1	0.0055899	2.83e-11	1.87986
486	Positive	8.873	258.299	Unknown	[M+H]+	null	null	null	null	0.025901	2.85e-11	1.75282
487	Positive	15.248	440.446	Unknown	[M+H]+	null	null	null	null	0.022619	2.87e-11	1.73666
488	Positive	0.236	784.649	Unknown	[M+H]+	null	null	null	null	0.018622	2.87e-11	1.82981
489	Positive	9.053	302.172	low score: Dobutamine	[M+H]+	C18H23NO3	Catecholamines and derivatives	JRWZLRBJNMZMFE-UHFFFAOYSA-N	[H]Oc(c([H])2)c([H])c([H])c(c([H])2)C([H])([H])C([H])([H])C([H])(C([H])([H])[H])N([H])C([H])([H])C([H])([H])c(c([H])1)c([H])c(O[H])c(O[H])c([H])1	0.2182	3.11e-11	1.65912
490	Positive	0.428	430.779	Unknown	[M+H]+	null	null	null	null	55.811	3.13e-11	1.70759
491	Positive	0.44	275.841	Unknown	[M+H]+	null	null	null	null	48.643	3.18e-11	1.76089
492	Positive	14.914	300.315	Unknown	[M+H]+	null	null	null	null	0.031717	3.32e-11	1.72435
493	Positive	1.807	131.939	Unknown	[M+H]+	null	null	null	null	167.03	3.35e-11	1.75781
494	Positive	17.791	637.526	Unknown	[M+H]+	null	null	null	null	0.032539	3.5e-11	1.84474
495	Positive	14.065	328.351	Unknown	[M+H]+	null	null	null	null	0.0035264	3.54e-11	1.75152
496	Positive	8.388	239.182	Unknown	[M+H]+	null	null	null	null	0.20267	3.54e-11	1.50636
497	Positive	17.776	376.331	low score: N-(3-Methoxybenzyl)palmitamide	[M+H]+	C24H41NO2	Anisoles	FIQGQTITXPTKIY-UHFFFAOYSA-N	O=C(NCC=1C=CC=C(OC)C1)CCCCCCCCCCCCCCC	0.022865	3.69e-11	1.65818
498	Positive	10.173	352.342	Unknown	[M+H]+	null	null	null	null	0.050617	3.69e-11	1.69182
499	Positive	0.67	379.814	Unknown	[M+H]+	null	null	null	null	79.67	3.76e-11	1.7644
500	Positive	1.043	826.774	Unknown	[M+H]+	null	null	null	null	9.5936	3.76e-11	1.72403
501	Positive	1.613	357.246	low score: 2,4-dihydroxy-6-methyl-3-[(2E,6E)-3,7,11-trimethyldodeca-2,6,10-trienyl]benzaldehyde	[M+2H]2+	C23H32O3	Sesquiterpenoids	QAPOXOGEDXIOHD-VZRGJMDUSA-N	O=CC1=C(O)C(=C(O)C=C1C)CC=C(C)CCC=C(C)CCC=C(C)C	0.020651	3.78e-11	1.57814
502	Positive	0.983	171.112	Unknown (carbon number 13); PlaSMA ID-399	[M+H]+	C13H14	Unknown	null	null	6.0158	3.92e-11	1.68255
503	Positive	17.335	758.636	Unknown	[M+H]+	null	null	null	null	0.0048222	3.92e-11	1.86123
504	Positive	1.052	261.034	no MS2: MLS002154021-01!Ifosfamide3778-73-2	[M+H]+	C7H15Cl2N2O2P	Isofamides	HOMGKSMUEGBAAB-UHFFFAOYSA-N	O=P1(OCCCN1CCCl)NCCCl	0.19758	3.95e-11	1.53385
505	Positive	10.308	388.248	low score: (1r,5R,7S)-5,7-diethyl-2-(1-ethyl-2-methyl-1H-indol-3-yl)-1,3-diazaadamantan-6-one	[M+Na]+	C23H31N3O	N-alkylindoles	KRYFHYSXWHRZKT-BRTIRZTQSA-N	O=C1C2(CN3CC1(CN(C2)C3C=4C=5C=CC=CC5N(C4C)CC)CC)CC	0.033709	3.98e-11	1.86853
506	Positive	0.425	229.908	Unknown	[M+H]+	null	null	null	null	40.627	4.01e-11	1.86204
507	Positive	1.16	191.052	4-Nitroquinoline-1-oxide	[M+H]+	C9H6N2O3	4-nitroquinoline N-oxides	YHQDZJICGQWFHK-UHFFFAOYSA-N	[O-][N+](=O)C1=CC=[N+]([O-])C2=CC=CC=C12	4.8265	4.22e-11	1.74507
508	Positive	0.425	105.962	Unknown	[M+H]+	null	null	null	null	36.74	4.25e-11	1.48119
509	Positive	0.371	124.095	HISTIDINOL	[M-H2O+H]+	C6H11N3O	Aralkylamines	ZQISRDCJNBUVMM-YFKPBYRVSA-N	N[C@H](CO)CC1=CN=CN1	9.8383	4.25e-11	1.89017
510	Positive	0.635	104.016	Unknown	[M+H]+	null	null	null	null	55.76	4.31e-11	1.63767
511	Positive	8.032	434.345	Unknown	[M+H]+	null	null	null	null	0.038835	4.39e-11	1.79686
512	Positive	14.909	830.643	Unknown	[M+H]+	null	null	null	null	0.025745	4.43e-11	1.83234
513	Positive	17.092	758.634	Unknown	[M+H]+	null	null	null	null	0.0029398	4.44e-11	1.87178
514	Positive	0.262	782.634	Unknown	[M+H]+	null	null	null	null	0.034762	4.59e-11	1.76883
515	Positive	14.537	830.646	Unknown	[M+H]+	null	null	null	null	0.028087	4.59e-11	1.8662
516	Positive	10.31	163.09	Unknown	[M+H]+	null	null	null	null	0.10773	4.74e-11	1.71184
517	Positive	7.989	158.165	Unknown	[M+H]+	null	null	null	null	32.041	4.74e-11	1.81347
518	Positive	1.039	754.84	Unknown	[M+H]+	null	null	null	null	4.3716	4.74e-11	1.68193
519	Positive	11.806	332.311	low score: phenylethylamide 331	[M+H]+	C22H37NO	N-acyl amines	ANKKFXJHCGAFIY-UHFFFAOYSA-N	O=C(CCCCCCCCCCCCC)NCCC1=CC=CC=C1	0.018358	4.74e-11	1.56317
520	Positive	1.037	854.831	Unknown	[M+H]+	null	null	null	null	10.355	4.74e-11	1.62694
521	Positive	9.586	454.331	low score: Peimine	[M+K]+	C27H45NO3	Cerveratrum-type alkaloids	IUKLSMSEHKDIIP-BZMYINFQSA-N	OC1CCC2(C)C(C1)C(O)CC3C4CCC5C(CN6CC(C)CCC6C5(O)C)C4CC32	0.15248	4.78e-11	1.58373
522	Positive	0.428	288.874	Unknown	[M+H]+	null	null	null	null	52.873	4.85e-11	1.76141
523	Positive	9.513	317.147	no MS2: Loureirin B	[M+H]+	C18H20O5	Retro-dihydrochalcones	ZPFRAPVRYLGYEC-UHFFFAOYSA-N	O=C(C1=CC=C(O)C=C1)CCC=2C(OC)=CC(OC)=CC2OC	0.10883	5.1e-11	1.71437
524	Positive	18.825	516.46	Unknown	[M+H]+	null	null	null	null	0.029033	5.16e-11	1.78505
525	Positive	12.197	314.366	Unknown	[M+H]+	null	null	null	null	0.0058525	5.16e-11	1.77663
526	Positive	1.021	164.935	Unknown	[M+H]+	null	null	null	null	0.13362	5.37e-11	1.61688
527	Positive	0.312	419.343	low score: "(3R,5R,7R,9S,10S,12S,13R,14S,17R)-17-((2R)-7-hydroxy-6-methylheptan-2-yl)-10,13-dimethylhexadecahydro-1H-cyclopenta[a]phenanthrene-3,7,12-triol"	[M-H2O+H]+	C27H48O4	Tetrahydroxy bile acids, alcohols and derivatives	XJZGNVBLVFOSKJ-PLAINUPSSA-N	C[C@H](CCCC(C)CO)[C@H]1CC[C@H]2[C@]([C@@H]3C[C@H](O)[C@@]21C)([H])[C@H](O)C[C@]4([H])[C@]3(C)CC[C@@H](O)C4	0.07228	5.37e-11	1.65275
528	Positive	17.774	321.344	Unknown	[M+H]+	null	null	null	null	0.04979	5.47e-11	1.51977
529	Positive	9.327	603.356	low score: (1S,2S,5R,7R,10S,11S,14R,16R,19S,20S,23R,25R)-5,14-diethyl-2,11,20,23-tetramethyl-4,13,22,28,29,30-hexaoxatetracyclo[23.2.1.1?,??.1??,??]triacontane-3,12,21-trione	[M+Na]+	C32H52O9	Macrolides and analogues	MXZXIBZNZUOHER-VHWZNAHMSA-N	O=C1OC(C)CC2OC(CC2)C(C(=O)OC(CC)CC3OC(CC3)C(C(=O)OC(CC)CC4OC(CC4)C1C)C)C	0.095849	5.49e-11	1.51036
530	Positive	0.426	230.906	Unknown	[M+H]+	null	null	null	null	163.7	5.69e-11	1.68499
531	Positive	14.913	808.652	Unknown	[M+H]+	null	null	null	null	0.031338	5.69e-11	1.65526
532	Positive	11.949	538.426	Unknown	[M+H]+	null	null	null	null	0.046083	5.72e-11	1.57839
533	Positive	9.28	496.429	Unknown	[M+H]+	null	null	null	null	0.085759	5.73e-11	1.41612
534	Positive	0.919	147.124	LYSINE	[M+H]+	C6H14N2O2	D-alpha-amino acids	KDXKERNSBIXSRK-YFKPBYRVSA-N	C(CCN)C[C@@H](C(=O)O)N	6.3535	5.93e-11	1.61197
535	Positive	0.45	176.964	Unknown	[M+H]+	null	null	null	null	69.064	6.19e-11	1.84224
536	Positive	12.294	405.357	low score: pentacosanoic acid	[M+Na]+	C25H50O2	Very long-chain fatty acids	MWMPEAHGUXCSMY-UHFFFAOYSA-N	O=C(O)CCCCCCCCCCCCCCCCCCCCCCCC	0.029682	6.23e-11	1.84519
537	Positive	9.663	520.786	Unknown	[M+H]+	null	null	null	null	0.029285	6.51e-11	1.7522
538	Positive	0.7	112.964	Unknown	[M+H]+	null	null	null	null	49.527	6.53e-11	1.67555
539	Positive	10.643	356.386	Unknown	[M+H]+	null	null	null	null	0.001757	6.53e-11	1.81023
540	Positive	1.04	222.925	Unknown	[M+H]+	null	null	null	null	0.047939	6.65e-11	1.58946
541	Positive	12.376	263.261	Unknown	[M+H]+	null	null	null	null	0.0064998	6.88e-11	1.74946
542	Positive	8.837	520.378	Unknown	[M+H]+	null	null	null	null	0.037538	6.88e-11	1.65754
543	Positive	1.114	208.904	Unknown	[M+H]+	null	null	null	null	2.7156	7.03e-11	1.69879
544	Positive	0.728	117.943	Unknown	[M+H]+	null	null	null	null	40.776	7.13e-11	1.75243
545	Positive	1.039	734.823	Unknown	[M+H]+	null	null	null	null	6.5382	7.13e-11	1.68669
546	Positive	1.182	599.446	low score: Daucosterol;Sitogluside	[M+Na]+	C35H60O6	Stigmastanes and derivatives	NPJICTMALKLTFW-OFUAXYCQSA-N	OCC1OC(OC2CC3=CCC4C(CCC5(C)C(CCC45)C(C)CCC(CC)C(C)C)C3(C)CC2)C(O)C(O)C1O	0.054202	7.15e-11	1.64399
547	Positive	9.264	518.357	low score: "Orlistat (Alli, Xenical)"	[M+Na]+	C29H53NO5	Leucine and derivatives	AHLBNYSZXLDEJQ-FWEHEUNISA-N	C1([C@H]([C@@H](O1)C[C@H](CCCCCCCCCCC)OC(=O)[C@H](CC(C)C)NC(=O)[H])CCCCCC)=O	0.073386	7.21e-11	1.62456
548	Positive	0.907	130.095	Pipecolic acid	[M+H]+	C6H11NO2	Alpha amino acids	HXEACLLIILLPRG-UHFFFAOYSA-N	O=C(O)C1NCCCC1	7.7907	7.55e-11	1.70691
549	Positive	8.548	510.393	Unknown	[M+H]+	null	null	null	null	0.033144	7.55e-11	1.65666
550	Positive	18.519	708.576	Unknown	[M+H]+	null	null	null	null	0.018455	7.73e-11	1.78599
551	Positive	10.082	576.464	no MS2: Ceramide (d18:1/16:0)	[M+K]+	C34H67NO3	Ceramides	YDNKGFDKKRUKPY-TURZORIXSA-N	CCCCCCCCCCCCCCCC(=O)N[C@@H](CO)[C@@H](/C=C/CCCCCCCCCCCCC)O	0.020224	7.99e-11	1.62636
552	Positive	8.12	460.309	Unknown	[M+H]+	null	null	null	null	0.0031002	8.08e-11	1.78213
553	Positive	0.615	138.977	Unknown	[M+H]+	null	null	null	null	4.7286	8.64e-11	1.54532
554	Positive	2.105	305.296	Unknown	[M+H]+	null	null	null	null	0.10384	8.66e-11	1.62009
555	Positive	1.039	870.771	no MS2: Triacylglycerol 16:1-18:2-18:2	[M+NH4]+	C55H96O6	Triacylglycerols	BNOFKGXXHHZEMK-VJZQUVOGSA-N	C(CC(OCC(OC(CCC=CCC=CCCCCCCCCCC)=O)COC(CCC=CCC=CCCCCCCCCCC)=O)=O)C=CCCCCCCCCCCC	10.577	8.67e-11	1.57392
556	Positive	0.43	290.872	Unknown	[M+H]+	null	null	null	null	67.935	8.75e-11	1.76804
557	Positive	1.057	776.812	Unknown	[M+H]+	null	null	null	null	9.9185	8.81e-11	1.59176
558	Positive	1.052	928.734	Unknown	[M+H]+	null	null	null	null	12.627	8.88e-11	1.61041
559	Positive	14.08	386.432	Unknown	[M+H]+	null	null	null	null	0.014911	8.99e-11	1.65116
560	Positive	0.441	151.949	Unknown	[M+H]+	null	null	null	null	15.792	9.14e-11	1.64521
561	Positive	8.732	934.62	Unknown	[M+H]+	null	null	null	null	0.019423	9.25e-11	1.64705
562	Positive	0.51	316.847	Unknown	[M+H]+	null	null	null	null	34.913	9.38e-11	1.72817
563	Positive	9.251	755.565	Unknown	[M+H]+	null	null	null	null	0.01727	9.39e-11	1.77311
564	Positive	14.644	419.344	low score: "(3R,5S,7R,9S,10S,12S,13R,14S,17R)-17-((2R)-7-hydroxy-6-methylheptan-2-yl)-10,13-dimethylhexadecahydro-1H-cyclopenta[a]phenanthrene-3,7,12-triol"	[M-H2O+H]+	C27H48O4	Tetrahydroxy bile acids, alcohols and derivatives	XJZGNVBLVFOSKJ-XZULNKEGSA-N	C[C@H](CCCC(C)CO)[C@H]1CC[C@H]2[C@]([C@@H]3C[C@H](O)[C@@]21C)([H])[C@H](O)C[C@H]4[C@]3(C)CC[C@@H](O)C4	0.17391	9.56e-11	1.62952
565	Positive	9.264	124.094	HISTIDINOL	[M-H2O+H]+	C6H11N3O	Aralkylamines	ZQISRDCJNBUVMM-YFKPBYRVSA-N	N[C@H](CO)CC1=CN=CN1	5.7182	9.61e-11	1.6612
566	Positive	0.657	246.905	Unknown	[M+H]+	null	null	null	null	11.893	9.86e-11	1.75822
567	Positive	1.656	243.842	Unknown	[M+H]+	null	null	null	null	26.708	1.03e-10	1.62828
568	Positive	16.712	780.624	Unknown	[M+H]+	null	null	null	null	0.018084	1.03e-10	1.80547
569	Positive	1.246	526.414	Unknown	[M+H]+	null	null	null	null	0.027513	1.05e-10	1.65445
570	Positive	1.033	258.128	low score: cyclo(Trp-Ala)	[M+H]+	C14H15N3O2	Alpha amino acids and derivatives	VDMMFAOUINDEGC-UHFFFAOYSA-N	O=C(NC1CC2=CNC3=C2C=CC=C3)C(C)NC1=O	0.0053082	1.05e-10	1.72014
571	Positive	12.433	374.338	low score: N-Benzylstearamide	[M+H]+	C25H43NO	N-acyl amines	IXODJGLAVBPVSW-UHFFFAOYSA-N	O=C(NCC=1C=CC=CC1)CCCCCCCCCCCCCCCCC	0.040177	1.08e-10	1.77036
572	Positive	10.24	510.391	Unknown	[M+H]+	null	null	null	null	0.12436	1.09e-10	1.67849
573	Positive	1.081	640.831	Unknown	[M+H]+	null	null	null	null	6.8391	1.11e-10	1.62566
574	Positive	9.167	526.341	low score: NCGC00380724-01_C28H47NO8_(3R,5R,6S,7S,9R,11E,13S,14R)-14-Ethyl-13-hydroxy-3,5,7,9,13-pentamethyl-2,4,10-trioxooxacyclotetradec-11-en-6-yl 3,4,6-trideoxy-3-(dimethylamino)-D-xylo-hexopyranoside	[M+Na]+	C28H47NO8	Aminoglycosides	UZQBOFAUUTZOQE-SOSMEOBRSA-N	CC[C@H]1OC(=O)[C@H](C)C(=O)[C@H](C)[C@@H](OC2O[C@H](C)C[C@@H]([C@H]2O)N(C)C)[C@@H](C)C[C@@H](C)C(=O)\C=C\[C@]1(C)O	0.072453	1.11e-10	1.66388
575	Positive	14.394	415.38	low score: (3beta)-stigmast-5-en-3-ol	[M+H]+	C29H50O	Stigmastanes and derivatives	KZJWDPNRJALLNS-VJSFXXLFSA-N	OC1CC2=CCC3C(CCC4(C)C(CCC34)C(C)CCC(CC)C(C)C)C2(C)CC1	0.023824	1.13e-10	1.72295
576	Positive	8.625	526.337	low score: NCGC00380724-01_C28H47NO8_(3R,5R,6S,7S,9R,11E,13S,14R)-14-Ethyl-13-hydroxy-3,5,7,9,13-pentamethyl-2,4,10-trioxooxacyclotetradec-11-en-6-yl 3,4,6-trideoxy-3-(dimethylamino)-D-xylo-hexopyranoside	[M+H]+	C28H47NO8	Aminoglycosides	UZQBOFAUUTZOQE-SOSMEOBRSA-N	CC[C@H]1OC(=O)[C@H](C)C(=O)[C@H](C)[C@@H](OC2O[C@H](C)C[C@@H]([C@H]2O)N(C)C)[C@@H](C)C[C@@H](C)C(=O)\C=C\[C@]1(C)O	0.039302	1.15e-10	1.603
577	Positive	9.958	708.552	Unknown	[M+H]+	null	null	null	null	0.022884	1.16e-10	1.6245
578	Positive	1.034	962.772	Unknown	[M+H]+	null	null	null	null	9.9475	1.17e-10	1.502
579	Positive	13.79	379.315	low score: conessine	[M+Na]+	C24H40N2	Conanine-type alkaloids	GPLGAQQQNWMVMM-CYFNKAHPSA-N	C1=C2CC(N(C)C)CCC2(C)C3CCC45CN(C)C(C)C5CCC4C3C1	0.0055373	1.19e-10	1.85563
580	Positive	0.483	288.856	Unknown	[M+H]+	null	null	null	null	101.56	1.19e-10	1.88085
581	Positive	17.723	429.277	Unknown	[M+H]+	null	null	null	null	0.054761	1.2e-10	1.77916
582	Positive	6.601	324.243	Unknown	[M+H]+	null	null	null	null	0.11545	1.21e-10	1.57734
583	Positive	9.664	714.345	Unknown	[M+H]+	null	null	null	null	0.021959	1.22e-10	1.54515
584	Positive	0.429	103.963	Unknown	[M+H]+	null	null	null	null	55.883	1.25e-10	1.49542
585	Positive	12.471	410.404	Unknown	[M+H]+	null	null	null	null	0.037921	1.25e-10	1.54282
586	Positive	1.048	858.736	Unknown	[M+H]+	null	null	null	null	24.625	1.28e-10	1.76698
587	Positive	15.664	284.316	Unknown	[M+H]+	null	null	null	null	0.028048	1.29e-10	1.8176
588	Positive	0.872	270.87	Unknown	[M+H]+	null	null	null	null	26.63	1.29e-10	1.74541
589	Positive	8.269	256.286	Unknown	[M+H]+	null	null	null	null	0.060192	1.31e-10	1.73114
590	Positive	0.428	139.996	Unknown	[M+H]+	null	null	null	null	62.739	1.33e-10	1.71138
591	Positive	1.024	189.172	Unknown	[M+H]+	null	null	null	null	0.15317	1.37e-10	1.84747
592	Positive	7.453	253.168	low score: Hexazinone	[M+H]+	C12H20N4O2	Dialkylarylamines	CAWXEEYDBZRFPE-UHFFFAOYSA-N	n1(C2CCCCC2)c(n(c(N(C)C)nc1=O)C)=O	0.09917	1.37e-10	1.69686
593	Positive	12.507	423.208	low score: Fludrocortisone	[M+H]+	C23H31FO6	Gluco/mineralocorticoids, progestogins and derivatives	SYWHXTATXSMDSB-GSLJADNHSA-N	O=C(OCC(=O)[C@]3(O)[C@]2(C[C@H](O)[C@]4(F)[C@@]1(/C(=C\C(=O)CC1)CC[C@H]4[C@@H]2CC3)C)C)C	32.199	1.38e-10	1.7233
594	Positive	9.658	504.379	Unknown	[M+H]+	null	null	null	null	0.066015	1.41e-10	1.78768
595	Positive	9.552	480.352	Unknown	[M+H]+	null	null	null	null	0.10247	1.41e-10	1.69862
596	Positive	12.375	377.301	low score: "(4R)-4-((3R,5S,9S,10S,13R,14S,17R)-3-hydroxy-10,13-dimethylhexadecahydro-1H-cyclopenta[a]phenanthren-17-yl)pentanoic acid"	[M+H]+	C24H40O3	Monohydroxy bile acids, alcohols and derivatives	SMEROWZSTRWXGI-NWFSOSCSSA-N	C[C@@]12[C@](CC[C@]3([H])[C@@H]2CC[C@@]4(C)[C@H]3CC[C@@H]4[C@@H](CCC(O)=O)C)([H])C[C@H](O)CC1	0.003298	1.43e-10	1.81531
597	Positive	13.507	250.106	low score: Goniothalenol	[M+NH4]+	C13H12O4	Furopyrans	ZKIRVBNLJKGIEM-UHFFFAOYSA-N	O=C1OC2C(OC(C=3C=CC=CC3)C2O)C=C1	0.041316	1.43e-10	1.70393
598	Positive	10.859	524.418	Unknown	[M+H]+	null	null	null	null	0.024085	1.43e-10	1.68689
599	Positive	0.559	233.871	Unknown	[M+H]+	null	null	null	null	47.781	1.44e-10	1.91732
600	Positive	16.819	692.627	Unknown	[M+H]+	null	null	null	null	0.026658	1.47e-10	1.75582
601	Positive	8.618	548.322	low score: (2S,3R,5S,9R)-2,3-dihydroxy-14-(hydroxymethyl)-5,9-dimethyl-14-{[(2S,3R,4S,5S,6R)-3,4,5-trihydroxy-6-(hydroxymethyl)oxan-2-yl]oxy}tetracyclo[11.2.1.0?,??.0?,?]hexadecane-5-carboxylic acid	[M+Na]+	C26H42O11	Diterpene glycosides	QUCGBWQRLWOVBR-BBJJSLPGSA-N	O=C(O)C1(C)CCCC2(C)C3CCC4CC3(CC4(OC5OC(CO)C(O)C(O)C5O)CO)C(O)C(O)C12	0.088369	1.5e-10	1.6295
602	Positive	11.021	317.148	low score: MMV392832	[M+H]+	C19H16N4O	Phenylpyrroles	SCLHBVYXOLVAFF-UHFFFAOYSA-N	N=1C=CC=C(C1)NC2=NC=CC=3NC(=CC23)C4=CC=CC(OC)=C4	0.082	1.54e-10	1.76067
603	Positive	15.518	267.292	Unknown	[M+H]+	null	null	null	null	0.020588	1.56e-10	1.48067
604	Positive	13.71	504.433	Unknown	[M+H]+	null	null	null	null	0.052932	1.63e-10	1.69385
605	Positive	9.051	242.166	low score: NCGC00385536-01!(2E,4E)-N-(1,3-dihydroxy-3-methylpentan-2-yl)-2-methylhexa-2,4-dienamide [IIN-based on: CCMSLIB00000845102]	[M+H]+	C13H23NO3	Tertiary alcohols	PHCDULUANYZTRK-RMTFUQJTSA-N	CCC(C)(O)C(CO)NC(=O)C(\\C)=C\\C=C\\C	0.1711	1.67e-10	1.60087
606	Positive	1.049	836.816	Unknown	[M+H]+	null	null	null	null	8.6737	1.67e-10	1.56595
607	Positive	1.187	148.054	low score: L-Glutamic acid; CE0; WHUUTDBJXJRKMK-VKHMYHEASA-N	[M+H]+	C5H9NO4	Glutamic acid and derivatives	WHUUTDBJXJRKMK-VKHMYHEASA-N	C(CC(=O)O)[C@@H](C(=O)O)N	0.05923	1.71e-10	1.73719
608	Positive	1.702	172.968	Unknown	[M+H]+	null	null	null	null	38.86	1.72e-10	1.70195
609	Positive	12.849	578.46	Unknown	[M+H]+	null	null	null	null	0.28947	1.73e-10	1.52805
610	Positive	8.129	503.357	low score: Glutamine chenodeoxycholic acid	[M-H2O+H]+	C29H48N2O6	Glycinated bile acids and derivatives	WKNSSWRPDRZCAQ-VVJLALRJSA-N	C[C@H](CCC(N[C@@H](CCC(N)=O)C(O)=O)=O)[C@H]1CC[C@@]2([H])[C@]3([H])[C@H](O)C[C@]4([H])C[C@H](O)CC[C@]4(C)[C@H]3CC[C@@]21C	0.027554	1.75e-10	1.77917
611	Positive	0.425	362.792	Unknown	[M+H]+	null	null	null	null	84.288	1.75e-10	1.67535
612	Positive	16.777	429.406	low score: Epifriedelanol	[M+H]+	C30H52O	Triterpenoids	XCDQFROEGGNAER-PFOIMGGJSA-N	OC1CCC2C(C)(CCC3C2(C)CCC4(C)C5CC(C)(C)CCC5(C)CCC34C)C1C	0.036906	1.76e-10	1.67612
613	Positive	1.208	147.087	low score: 3-Trimethylsilylpropionic acid	[M+NH4]+	C6H14O2Si	Carboxylic acids	NONFLFDSOSZQHR-UHFFFAOYSA-N	O=C(O)CC[Si](C)(C)C	3.2193	1.81e-10	1.63862
614	Positive	1.264	421.105	no MS2: NCGC00168932-02_C18H22O10_5-Benzofuranpropanoic acid, 4-(beta-D-glucopyranosyloxy)-6-methoxy-	[M+Na]+	C18H22O10	Phenolic glycosides	OLFRCQFNQXYDGW-NDOBWRGRSA-N	COC1=C(CCC(O)=O)C(=C2C=COC2=C1)O[C@@H]3O[C@H](CO)[C@@H](O)[C@H](O)[C@H]3O	30.563	1.81e-10	1.57649
615	Positive	9.313	296.248	Unknown	[M+H]+	null	null	null	null	0.072964	1.82e-10	1.67449
616	Positive	1.4	224.148	low score: Camellimidazole D	[M+H]+	C10H17N5O	2-heteroaryl carboxamides	VTPXABIHFAGVJO-UHFFFAOYSA-N	CN1C2=C(N(CN(CN(C)C2=O)C)C)N=C1	0.12684	1.82e-10	1.66369
617	Positive	12.376	393.278	Unknown	[M+H]+	null	null	null	null	0.020763	1.87e-10	1.81547
618	Positive	14.545	832.655	Unknown	[M+H]+	null	null	null	null	0.05956	1.95e-10	1.71241
619	Positive	0.293	807.645	Unknown	[M+H]+	null	null	null	null	0.035258	2e-10	1.87884
620	Positive	12.977	353.301	Unknown	[M+H]+	null	null	null	null	0.041826	2.02e-10	1.74055
621	Positive	8.106	542.372	low score: NCGC00381175-01!3-hydroxy-2-[[3-[3-(3-hydroxy-6-methylheptanoyl)oxy-6-methylheptanoyl]oxy-8-methylnonanoyl]amino]propanoic acid [IIN-based on: CCMSLIB00000848442]	[M-H2O+H]+	C29H53NO9	N-acyl-alpha amino acids	MWZPHNZNPKKSEI-UHFFFAOYSA-N	CC(C)CCCCC(CC(=O)NC(CO)C(O)=O)OC(=O)CC(CCC(C)C)OC(=O)CC(O)CCC(C)C	0.026309	2.07e-10	1.55135
622	Positive	8.12	473.306	low score: NCGC00347850-02_C26H42O6_2-(4a-Methyl-8-methylenedecahydro-2-naphthalenyl)-2-propanyl 6-deoxy-2-O-[(2E)-2-methyl-2-butenoyl]hexopyranoside	[M+Na]+	C26H42O6	Eudesmane, isoeudesmane or cycloeudesmane sesquiterpenoids	QKRNXYDUTFTSBG-NVNXTCNLSA-N	C\C=C(\C)C(=O)OC1C(O)C(O)C(C)OC1OC(C)(C)C2CCC3(C)CCCC(=C)C3C2	0.02367	2.21e-10	1.71233
623	Positive	0.646	224.899	Unknown	[M+H]+	null	null	null	null	43.102	2.21e-10	1.66661
624	Positive	18.355	599.554	Unknown	[M+H]+	null	null	null	null	0.031372	2.21e-10	1.58054
625	Positive	1.049	996.727	Unknown	[M+H]+	null	null	null	null	14.582	2.22e-10	1.49731
626	Positive	8.753	520.438	no MS2: "2alpha-acetoxy-3beta,22alpha-stictandiol"	[M+NH4]+	C32H54O4	Sesquiterpenoids	QZWMMIGRNYLXMG-XDRJWLFLSA-N	CC1(C)C2CC[C@@]3(C)C(CCC4C3(CCC3[C@@H](O)C(C)(C)CCC43C)C)C2(C)CC(OC(=O)C)C1O	0.047847	2.25e-10	1.47934
627	Positive	10.006	664.518	Unknown	[M+H]+	null	null	null	null	0.014762	2.28e-10	1.63654
628	Positive	9.676	792.062	Unknown	[M+H]+	null	null	null	null	0.0081698	2.28e-10	1.55622
629	Positive	12.376	372.344	low score: NCGC00380102-01!3-hexadecyl-4-methoxy-5-methyloxolan-2-one	[M+NH4]+	C22H42O3	Gamma butyrolactones	DJNFXUFERDZHCD-UHFFFAOYSA-N	CCCCCCCCCCCCCCCCC1C(OC)C(C)OC1=O	0.0098993	2.31e-10	1.76664
630	Positive	0.396	148.145	Unknown	[M+H]+	null	null	null	null	0.32629	2.31e-10	1.61637
631	Positive	10.828	356.377	Unknown	[M+H]+	null	null	null	null	0.0046785	2.31e-10	1.5323
632	Positive	10.066	508.413	Unknown	[M+H]+	null	null	null	null	0.041532	2.34e-10	1.57378
633	Positive	1.036	424.909	Unknown	[M+H]+	null	null	null	null	0.13638	2.43e-10	1.55918
634	Positive	10.263	508.414	Unknown	[M+H]+	null	null	null	null	0.14629	2.46e-10	1.75938
635	Positive	18.973	537.404	low score: Lysine conjugated cholic acid	[M+H]+	C30H52N2O6	Glycinated bile acids and derivatives	FTOTVNJFGHCOCZ-UHFFFAOYSA-N	C[CH](CCC(NC(CCCCN)C(O)=O)=O)[CH]1CC[CH]2[C]3([H])[CH](O)C[C]4([H])C[CH](O)CC[C]4(C)[CH]3C[CH](O)[C]21C	0.044359	2.48e-10	1.82021
636	Positive	8.982	530.366	no MS2: Histidine conjugated chenodeoxycholic acid	[M+H]+	C30H47N3O5	Glycinated bile acids and derivatives	XTVWUFJAQMCVQZ-KJUDKMOBSA-N	C[C@H](CCC(N[C@@H](CC1=CNC=N1)C(O)=O)=O)[C@H]2CC[C@@]3([H])[C@]4([H])[C@H](O)C[C@]5([H])C[C@H](O)CC[C@]5(C)[C@H]4CC[C@@]32C	0.10971	2.49e-10	1.66382
637	Positive	10.851	522.769	Unknown	[M+H]+	null	null	null	null	0.062849	2.52e-10	1.64957
638	Positive	0.607	298.852	Unknown	[M+H]+	null	null	null	null	64.915	2.61e-10	1.78666
639	Positive	1.087	630.802	no MS2: (NAG)(MUR)-None;(G-G)-(NAG)(NAM)-AqK	[M+2H]2+	C50H85N9O28	Dipeptides	VJMFFJSXYVHPJU-UHFFFAOYSA-N	CC(=O)NC1C(OC2C(CO)OC(OC3C(CO)OC(OC4C(CO)OC(O)C(NC(C)=O)C4OC(C)C(=O)NC(C)C(=O)NC(CCC(=O)NC(CCCCN)C(=O)O)C(N)=O)C(NC(C)=O)C3O)C(N)C2OC(C)C(=O)O)OC(CO)C(O)C1O	5.2974	2.64e-10	1.54078
640	Positive	1.038	768.818	Unknown	[M+H]+	null	null	null	null	8.8175	2.64e-10	1.7292
641	Positive	1.399	513.857	Unknown	[M+H]+	null	null	null	null	0.036257	2.66e-10	1.69859
642	Positive	9.347	688.321	no MS2: Ferrichrome	[M+H]+	C27H45N9O12	Oligopeptides	ZFDAUYPBCXMSBF-UHFFFAOYSA-N	CC(=O)N(CCCC1C(=O)NC(C(=O)NC(C(=O)NCC(=O)NCC(=O)NCC(=O)N1)CCCN(C(=O)C)O)CCCN(C(=O)C)O)O	0.046826	2.66e-10	1.63394
643	Positive	16.733	758.624	Unknown	[M+H]+	null	null	null	null	0.0075175	2.66e-10	1.8008
644	Positive	0.029	759.639	Unknown	[M+H]+	null	null	null	null	0.042079	2.66e-10	1.80842
645	Positive	7.808	621.351	low score: NCGC00381318-01![3-methyl-1-[3-methyl-1-[3-methyl-1-oxo-1-(2,3,4,5,6-pentahydroxyhexoxy)pentan-2-yl]oxy-1-oxopentan-2-yl]oxy-1-oxopentan-2-yl] 2-hydroxy-3-methylpentanoate [IIN-based on: CCMSLIB00000845116]	[M-H2O+H]+	C30H54O14	Depsipeptides	XHFZCGJKWBSHAG-UHFFFAOYSA-N	CCC(C)C(O)C(=O)OC(C(C)CC)C(=O)OC(C(C)CC)C(=O)OC(C(C)CC)C(=O)OCC(O)C(O)C(O)C(O)CO	0.036208	2.85e-10	1.76706
646	Positive	12.036	314.372	Unknown	[M+H]+	null	null	null	null	0.0051496	2.89e-10	1.67903
647	Positive	6.681	427.305	low score: Leupeptin	[M+H]+	C20H38N6O4	Dipeptides	GDBQQVLCIARPGH-IKGGRYGDSA-N	NC(=N)NCCCC(C=O)NC(=O)C(CC(C)C)NC(=O)C(CC(C)C)NC(C)=O	0.099414	2.92e-10	1.37111
648	Positive	1.031	434.93	Unknown	[M+H]+	null	null	null	null	0.19334	2.92e-10	1.5696
649	Positive	13.478	298.297	low score: Tridemorph	[M+H]+	C19H39NO	Morpholines	YTOPFCCWCSOHFV-UHFFFAOYSA-N	CCCCCCCCCCCCCN(C1)CC(C)OC(C)1	0.029329	2.93e-10	1.81414
650	Positive	15.854	381.417	Unknown	[M+H]+	null	null	null	null	0.022585	2.95e-10	1.70545
651	Positive	0.427	352.849	Unknown	[M+H]+	null	null	null	null	52.769	2.96e-10	1.69665
652	Positive	1.056	792.791	Unknown	[M+H]+	null	null	null	null	7.4959	3.04e-10	1.53792
653	Positive	1.085	710.82	no MS2: (NAG)(NAM)-None;(G-G)-(NAG)(NAM)[r]-AemA	[M+2H]2+	C56H93N9O33	Oligopeptides	OYAWYQINHWGNPP-UHFFFAOYSA-N	CC(=O)NC(CO)C(OC(C)C(=O)NC(C)C(=O)NC(CCC(=O)NC(CCCC(N)C(=O)O)C(=O)NC(C)C(=O)O)C(=O)O)C(OC1OC(CO)C(OC2OC(CO)C(OC3OC(CO)C(O)C(O)C3NC(C)=O)C(OC(C)C(=O)O)C2NC(C)=O)C(O)C1NC(C)=O)C(O)CO	4.1582	3.24e-10	1.47468
654	Positive	14.569	783.665	Unknown	[M+H]+	null	null	null	null	0.050555	3.24e-10	1.67437
655	Positive	1.276	513.852	Unknown	[M+H]+	null	null	null	null	0.031794	3.25e-10	1.63128
656	Positive	0.628	213.907	Unknown	[M+H]+	null	null	null	null	44.981	3.31e-10	1.74233
657	Positive	12.461	397.409	Unknown	[M+H]+	null	null	null	null	0.020601	3.31e-10	1.55919
658	Positive	13.461	683.59	Unknown	[M+H]+	null	null	null	null	0.018326	3.38e-10	1.54082
659	Positive	6.255	324.246	no MS2: Melophlin B/C/G/K/L/N/O	[M+H]+	C19H33NO3	N-alkylpyrrolidines	WBPPODSRZVXVJK-MSUUIHNZSA-N	CCCCCCCCCCCC/C(O)=C(C1=O)\C(C(N1C)C)=O	0.10995	3.39e-10	1.58026
660	Positive	15.522	449.325	low score: "(6R)-3-hydroxy-2-methyl-6-((3R,5S,7R,8R,9S,10S,12S,13R,14S,17R)-3,7,12-trihydroxy-10,13-dimethylhexadecahydro-1H-cyclopenta[a]phenanthren-17-yl)heptanoic acid"	[M-H2O+H]+	C27H46O6	Tetrahydroxy bile acids, alcohols and derivatives	FAYYTQMQTAKHRM-QDVPYJSNSA-N	C[C@@H]([C@H]1CC[C@]2([H])[C@]1(C)[C@@H](O)C[C@@]3([H])[C@@]2([H])[C@H](O)C[C@@]4([H])[C@]3(C)CC[C@@H](O)C4)CCC(O)C(C)C(O)=O	0.036804	3.45e-10	1.61656
661	Positive	15.852	336.356	Unknown	[M+H]+	null	null	null	null	0.041847	3.52e-10	1.53432
662	Positive	12.524	287.258	Unknown	[M+H]+	null	null	null	null	0.20686	3.6e-10	1.65654
663	Positive	9.169	300.32	Unknown	[M+H]+	null	null	null	null	0.032607	3.64e-10	1.64012
664	Positive	12.377	400.376	Unknown	[M+H]+	null	null	null	null	0.012353	3.66e-10	1.73997
665	Positive	14.396	471.352	low score: glycyrrhetic acid	[M+H]+	C30H46O4	Triterpenoids	MPDGHEJMBKOTSU-YKLVYJNSSA-N	O=C(O)C1(C)CCC2(C)CCC3(C(=CC(=O)C4C5(C)CCC(O)C(C)(C)C5CCC43C)C2C1)C	0.031051	3.66e-10	1.73377
666	Positive	1.053	924.734	Unknown	[M+H]+	null	null	null	null	12.944	3.83e-10	1.70725
667	Positive	0.502	279.851	Unknown	[M+H]+	null	null	null	null	16.417	3.84e-10	1.79771
668	Positive	9.65	560.364	low score: NCGC00381175-01!3-hydroxy-2-[[3-[3-(3-hydroxy-6-methylheptanoyl)oxy-6-methylheptanoyl]oxy-8-methylnonanoyl]amino]propanoic acid	[M+H]+	C29H53NO9	N-acyl-alpha amino acids	MWZPHNZNPKKSEI-UHFFFAOYSA-N	CC(C)CCCCC(CC(=O)NC(CO)C(O)=O)OC(=O)CC(CCC(C)C)OC(=O)CC(O)CCC(C)C	0.033369	4.03e-10	1.76223
669	Positive	13.797	395.291	low score: Unknown (carbon number 27); PlaSMA ID-2165	[M+K]+	C27H38O2	Unknown	null	null	0.059262	4.11e-10	1.81696
670	Positive	9.16	454.334	low score: Peimine	[M+Na]+	C27H45NO3	Cerveratrum-type alkaloids	IUKLSMSEHKDIIP-BZMYINFQSA-N	OC1CCC2(C)C(C1)C(O)CC3C4CCC5C(CN6CC(C)CCC6C5(O)C)C4CC32	0.082092	4.13e-10	1.53837
671	Positive	9.568	568.381	Unknown	[M+H]+	null	null	null	null	0.20704	4.14e-10	1.61165
672	Positive	0.75	111.976	Unknown	[M+H]+	null	null	null	null	18.903	4.16e-10	1.55889
673	Positive	12.171	417.357	Unknown	[M+H]+	null	null	null	null	0.054583	4.27e-10	1.69491
674	Positive	8.843	310.265	low score: Bentyl	[M+Na]+	C19H35NO2	Carboxylic acid esters	CURUTKGFNZGFSE-UHFFFAOYSA-N	CCN(CC)CCOC(=O)C1(CCCCC1)C2CCCCC2	0.051076	4.36e-10	1.49582
675	Positive	1.035	802.773	Unknown	[M+H]+	null	null	null	null	8.7688	4.36e-10	1.58729
676	Positive	0.283	457.312	no MS2: Nakijiquinone H	[M+H]+	C26H40N4O3	Prenylquinones	UOJQVKJSJVULOG-UHFFFAOYSA-N	CC1=CCCC2C1(C)CCC(C)C2(C)CC3=C(O)C(C=C(NCCCCNC(N)=N)C3=O)=O	0.045808	4.41e-10	1.65055
677	Positive	0.77	195.925	Unknown	[M+H]+	null	null	null	null	18.63	4.46e-10	1.58358
678	Positive	9.882	544.38	Unknown	[M+H]+	null	null	null	null	0.18762	4.49e-10	1.70947
679	Positive	0.702	244.908	Unknown	[M+H]+	null	null	null	null	15.468	4.53e-10	1.5164
680	Positive	7.344	415.242	low score: Tentoxin	[M+H]+	C22H30N4O4	Oligopeptides	SIIRBDOFKDACOK-LFXZBHHUSA-N	C[C@H]1C(=O)N[C@H](C(=O)N(/C(=C\C2=CC=CC=C2)/C(=O)NCC(=O)N1C)C)CC(C)C	12.185	4.59e-10	1.49043
681	Positive	9.686	522.392	Unknown	[M+H]+	null	null	null	null	0.042731	4.66e-10	1.5727
682	Positive	7.866	316.217	low score: "Saxagliptin (BMS-477118,Onglyza)"	[M+H]+	C18H25N3O2	Alpha amino acid amides	QGJUIPDUBHWZPV-BBIKMUCQSA-N	C1C2CC3(CC1CC(C2)(O)C3)[C@@H](C(N4[C@@H](C[C@]5([C@]4(C5)[H])[H])C#N)=O)N	0.048388	4.81e-10	1.75519
683	Positive	8.791	627.352	low score: Biselyngbyaside	[M+Na]+	C34H52O9	Macrolides and analogues	QLNOFWPLTFNJPW-NZIIEGKCSA-N	C/C=C/C/C(C)=C\[C@@H](C/C=C/C=C/C[C@H](C)/C=C(C)/[C@@H](OC)C/C=C/[C@@H](O[C@@H]([C@@H]1O)O[C@H](CO)[C@@H](O)[C@@H]1OC)C2)OC2=O	0.044614	4.81e-10	1.64834
684	Positive	16.393	365.291	Unknown	[M+H]+	null	null	null	null	0.089952	4.81e-10	1.63864
685	Positive	13.597	298.299	Unknown	[M+H]+	null	null	null	null	0.097503	4.81e-10	1.47455
686	Positive	1.045	842.807	Unknown	[M+H]+	null	null	null	null	8.1749	4.89e-10	1.43965
687	Positive	10.218	590.434	Unknown	[M+H]+	null	null	null	null	0.034188	4.9e-10	1.7145
688	Positive	12.97	552.441	Unknown	[M+H]+	null	null	null	null	0.064322	4.91e-10	1.54844
689	Positive	16.742	492.477	Unknown	[M+H]+	null	null	null	null	0.023829	4.94e-10	1.48592
690	Positive	13.676	538.469	Unknown	[M+H]+	null	null	null	null	0.053258	5.06e-10	1.68833
691	Positive	0.492	300.851	Unknown	[M+H]+	null	null	null	null	39.212	5.17e-10	1.62096
692	Positive	0.823	105.943	Unknown	[M+H]+	null	null	null	null	33.326	5.24e-10	1.7746
693	Positive	1.065	708.824	no MS2: (NAG)(NAM)-AqK[3-NH2-n];(G-G)-(NAG)(NAM)-None	[M+2H]2+	C56H93N11O31	Dipeptides	DKTVIHASXILTBS-UHFFFAOYSA-N	CC(=O)NC1C(OC2C(CO)OC(OC3C(CO)OC(OC4C(CO)OC(O)C(NC(C)=O)C4OC(C)C(=O)O)C(NC(C)=O)C3O)C(NC(C)=O)C2OC(C)C(=O)NC(C)C(=O)NC(CCC(=O)NC(CCCCNC(=O)CC(N)C(N)=O)C(=O)O)C(N)=O)OC(CO)C(O)C1O	6.8415	5.41e-10	1.52186
694	Positive	1.059	746.763	Unknown	[M+H]+	null	null	null	null	7.4678	5.44e-10	1.58941
695	Positive	19.362	540.472	low score: DG(14:0/0:0/14:0) (d5)	[M+Na]+	C31H55[2H]5O5	1,3-diacylglycerols	JADYBWICRJWGBW-IPDPWHDOSA-N	[2H]C([2H])(C([2H])(C([2H])([2H])OC(=O)CCCCCCCCCCCCC)O)OC(=O)CCCCCCCCCCCCC	0.05937	5.48e-10	1.56766
696	Positive	17.508	625.51	Unknown	[M+H]+	null	null	null	null	0.039084	5.51e-10	1.59109
697	Positive	9.111	207.046	no MS2: 5-(1,2-dithiolan-3-yl)pentanoic acid	[M+H]+	C8H14O2S2	Lipoic acids and derivatives	AGBQKNBQESQNJD-UHFFFAOYSA-N	O=C(O)CCCCC1SSCC1	2.1779	5.84e-10	1.62891
698	Positive	9.346	598.482	Unknown	[M+H]+	null	null	null	null	0.024737	5.84e-10	1.43422
699	Positive	1.071	970.764	Unknown	[M+H]+	null	null	null	null	12.681	6.07e-10	1.44089
700	Positive	18.825	521.416	Unknown	[M+H]+	null	null	null	null	0.056825	6.16e-10	1.78225
701	Positive	10.047	620.494	Unknown	[M+H]+	null	null	null	null	0.037996	6.16e-10	1.60891
702	Positive	14.621	431.425	Unknown	[M+H]+	null	null	null	null	0.012127	6.16e-10	1.55076
703	Positive	8.369	518.76	Unknown	[M+H]+	null	null	null	null	59.547	6.27e-10	1.65114
704	Positive	1.316	224.148	low score: Camellimidazole D	[M+H]+	C10H17N5O	2-heteroaryl carboxamides	VTPXABIHFAGVJO-UHFFFAOYSA-N	CN1C2=C(N(CN(CN(C)C2=O)C)C)N=C1	0.13849	6.27e-10	1.52691
705	Positive	0.464	255.855	Unknown	[M+H]+	null	null	null	null	90.055	6.28e-10	1.81412
706	Positive	10.057	570.403	low score: "(4R)-4-((3R,5S,7R,9S,10S,13R,14S,17R)-3,7-dihydroxy-10,13-dimethylhexadecahydro-1H-cyclopenta[a]phenanthren-17-yl)-N-methyl-N-((2S,3R,4R,5R)-2,3,4,5,6-pentahydroxyhexyl)pentanamide"	[M+H]+	C31H55NO8	Dihydroxy bile acids, alcohols and derivatives	KUXSAFRZQPYINU-SGWAQUIASA-N	C[C@H](CCC(N(C)C[C@H](O)[C@@H](O)[C@@H]([C@@H](CO)O)O)=O)[C@H]1CC[C@H]2[C@]3([H])[C@H](O)C[C@@H]4C[C@H](O)CC[C@]4(C)[C@H]3CC[C@@]21C	0.055291	6.32e-10	1.62499
707	Positive	17.896	615.513	Unknown	[M+H]+	null	null	null	null	0.048035	6.51e-10	1.74692
708	Positive	15.541	747.645	Unknown	[M+H]+	null	null	null	null	0.05264	6.89e-10	1.75072
709	Positive	10.86	631.373	low score: 3-(dimethyl(3-((4R)-4-((3R,7R,12S,17R)-3,7,12-trihydroxy-10,13-dimethylhexadecahydro-1H-cyclopenta[a]phenanthren-17-yl)pentanamido)propyl)ammonio)-2-hydroxypropane-1-sulfonate	[M+H]+	C32H58N2O8S	Trihydroxy bile acids, alcohols and derivatives	GUQQBLRVXOUDTN-AKTHIIOISA-N	O=C(NCCC[N+](C)(C)CC(O)CS(=O)(=O)[O-])CCC(C)C1CCC2C3C(O)CC4CC(O)CCC4(C)C3CC(O)C12C	0.04624	6.94e-10	1.70956
710	Positive	11.806	287.245	low score: NCGC00179862-03_C20H32O2_1-Naphthalenecarboxaldehyde, decahydro-5-[(3E)-5-hydroxy-3-methyl-3-penten-1-yl]-1,4a-dimethyl-6-methylene-, (1R,4aR,5S)-	[M-H2O+H]+	C20H32O2	Diterpenoids	FSLWKIHHQUNBQK-LDGRNEMHSA-N	C\C(CC[C@H]1C(=C)CCC2[C@@](C)(CCC[C@]12C)C=O)=C/CO	0.10594	6.99e-10	1.52963
711	Positive	1.067	834.785	Unknown	[M+H]+	null	null	null	null	8.6045	7.19e-10	1.44388
712	Positive	1.274	269.989	Unknown	[M+H]+	null	null	null	null	23.476	7.21e-10	1.68489
713	Positive	1.068	724.753	Unknown	[M+H]+	null	null	null	null	7.3975	7.33e-10	1.51258
714	Positive	13.698	682.421	low score: 11-hydroxy-9-(hydroxymethyl)-2-methoxycarbonyl-2,6a,6b,9,12a-pentamethyl-10-(3,4,5-trihydroxyoxan-2-yl)oxy-1,3,4,5,6,6a,7,8,8a,10,11,12,13,14b-tetradecahydropicene-4a-carboxylic acid	[M+NH4]+	C36H56O11	Triterpenoids	SFZVDNKTWPZIJG-UHFFFAOYSA-N	O=C(O)C12CCC(C(=O)OC)(C)CC2C3=CCC4C5(C)CC(O)C(OC6OCC(O)C(O)C6O)C(C)(CO)C5CCC4(C)C3(C)CC1	0.022325	7.39e-10	1.79088
715	Positive	6.35	325.212	low score: Abietic acid	[M+Na]+	C20H30O2	Diterpenoids	RSWGJHLUYNHPMX-UHFFFAOYSA-N	O=C(O)C1(C)CCCC2(C)C3C(C=C(CC3)C(C)C)=CCC12	2.5127	7.49e-10	1.49514
716	Positive	0.424	186.991	no MS2: D-(-)-3-PHOSPHOGLYCERIC ACID	[M+ACN+Na]+	C3H7O7P	Sugar acids and derivatives	OSJPPGNTCRNQQC-UHFFFAOYSA-N	C(C(C(=O)O)O)OP(=O)(O)O	21.975	7.83e-10	1.60692
717	Positive	1.072	848.714	Unknown	[M+H]+	null	null	null	null	11.031	7.88e-10	1.65346
718	Positive	7.865	220.152	low score: (4S,5Z,6S)-4-(2-methoxy-2-oxoethyl)-5-[2-[(E)-3-phenylprop-2-enoyl]oxyethylidene]-6-[(2S,3R,4S,5S,6R)-3,4,5-trihydroxy-6-(hydroxymethyl)oxan-2-yl]oxy-4H-pyran-3-carboxylic acid	[M+NH4]+	C10H18O4	Oxolanes	IVOODSRSVJPWLY-UHFFFAOYSA-N	O=C(O)C(C)C1OC(CC1)CC(O)C	0.077796	7.9e-10	1.52775
719	Positive	7.478	274.295	Unknown	[M+H]+	null	null	null	null	0.068119	8.02e-10	1.55169
720	Positive	8.18	473.299	low score: NCGC00347850-02_C26H42O6_2-(4a-Methyl-8-methylenedecahydro-2-naphthalenyl)-2-propanyl 6-deoxy-2-O-[(2E)-2-methyl-2-butenoyl]hexopyranoside	[M+Na]+	C26H42O6	Eudesmane, isoeudesmane or cycloeudesmane sesquiterpenoids	QKRNXYDUTFTSBG-NVNXTCNLSA-N	C\C=C(\C)C(=O)OC1C(O)C(O)C(C)OC1OC(C)(C)C2CCC3(C)CCCC(=C)C3C2	0.035872	8.2e-10	1.66237
721	Positive	0.438	208.93	Unknown	[M+H]+	null	null	null	null	25.538	8.2e-10	1.58261
722	Positive	1.101	822.815	Unknown	[M+H]+	null	null	null	null	5.0254	8.26e-10	1.52445
723	Positive	1.038	222.899	Unknown	[M+H]+	null	null	null	null	0.1855	8.32e-10	1.52218
724	Positive	1.042	786.842	Unknown	[M+H]+	null	null	null	null	11.09	8.37e-10	1.50135
725	Positive	6.337	324.242	Unknown	[M+H]+	null	null	null	null	0.1288	8.56e-10	1.55421
726	Positive	10.49	344.347	Unknown	[M+H]+	null	null	null	null	0.048384	8.6e-10	1.67171
727	Positive	0.741	337.87	Unknown	[M+H]+	null	null	null	null	11.203	8.67e-10	1.53879
728	Positive	1.026	753.857	Unknown	[M+H]+	null	null	null	null	5.9304	8.92e-10	1.57512
729	Positive	7.02	432.268	low score: Marineosin A	[M+Na]+	C25H35N3O2	Oxanes	JPTGQNMDWMSVSF-DUENCVSESA-N	[H][C@]12C[C@H](C)O[C@]3(N=C(C[C@H]3OC)C3=CC=CN3)[C@]1([H])C1=CC=C(CCCCCCC2)N1	10.224	8.93e-10	1.56825
730	Positive	10.492	658.381	Unknown	[M+H]+	null	null	null	null	26.978	9.13e-10	1.74024
731	Positive	0.724	286.852	Unknown	[M+H]+	null	null	null	null	184.88	9.18e-10	1.76348
732	Positive	15.17	441.327	no MS2: Leupeptin Pr-LL	[M+H]+	C21H40N6O4	Dipeptides	BFUKWVVFVGUARP-GTPINHCMSA-N	CC(CC(NC(CC)=O)C(NC(C(N[C@H](C=O)CCC/N=C(N)\N)=O)CC(C)C)=O)C	0.10314	9.18e-10	1.59659
733	Positive	0.513	293.874	Unknown	[M+H]+	null	null	null	null	85.982	9.29e-10	1.8682
734	Positive	0.596	241.903	Unknown	[M+H]+	null	null	null	null	75.096	9.29e-10	1.70451
735	Positive	19.54	824.591	Unknown	[M+H]+	null	null	null	null	0.051372	9.29e-10	1.86901
736	Positive	10.865	614.395	low score: Edpetiline	[M+Na]+	C33H53NO8	Steroidal saponins	DHQFYEJMFMYGCV-UHFFFAOYSA-N	O=C1CC2C3CCC4C(CN5CC(C)CCC5C4(O)C)C3CC2C6(C)CCC(OC7OC(CO)C(O)C(O)C7O)CC16	0.03465	9.31e-10	1.7663
737	Positive	1.055	650.858	Unknown	[M+H]+	null	null	null	null	8.007	9.37e-10	1.59475
738	Positive	1.086	203.171	no MS2: NCGC00381391-01_C11H22O3_1-(2-Hydroxyethyl)-2,2,6-trimethyl-1,4-cyclohexanediol	[M+H]+	C11H22O3	Cyclohexanols	QXUANCZURDYUIT-UHFFFAOYSA-N	CC1CC(O)CC(C)(C)C1(O)CCO	0.24063	9.61e-10	1.56139
739	Positive	10.494	606.352	Unknown	[M+H]+	null	null	null	null	28.321	9.67e-10	1.72625
740	Positive	1.044	756.79	Unknown	[M+H]+	null	null	null	null	8.7212	9.72e-10	1.59121
741	Positive	1.045	718.848	Unknown	[M+H]+	null	null	null	null	11.91	9.79e-10	1.54676
742	Positive	1.039	784.846	Unknown	[M+H]+	null	null	null	null	13.477	9.88e-10	1.45589
743	Positive	1.044	734.783	Unknown	[M+H]+	null	null	null	null	7.8705	9.97e-10	1.57096
744	Positive	0.344	309.225	low score: h_88_stanozolol_4b_oh	[M-2H2O+H]+	C21H32N2O2	Estrane steroids	OCUSYXNRARMJHS-JQPLYGKBSA-N	C[C@](O)(CC1)[C@@]2(C)[C@@H]1[C@H](CC[C@@H]3[C@]4(C)CC5=CNN=C5C3O)[C@@H]4CC2	4.185	1.01e-09	1.49933
745	Positive	0.429	144.991	Unknown	[M+H]+	null	null	null	null	29.441	1.02e-09	1.39264
746	Positive	9.728	482.396	Unknown	[M+H]+	null	null	null	null	0.067377	1.06e-09	1.48427
747	Positive	12.376	355.316	Unknown	[M+H]+	null	null	null	null	0.018947	1.07e-09	1.61972
748	Positive	0.44	314.876	Unknown	[M+H]+	null	null	null	null	32.464	1.12e-09	1.70441
749	Positive	1.116	838.681	Unknown	[M+H]+	null	null	null	null	6.9587	1.13e-09	1.54648
750	Positive	18.991	708.571	Unknown	[M+H]+	null	null	null	null	0.037946	1.14e-09	1.88624
751	Positive	1.085	177.137	no MS2: (S)-(+)-2-(anilinomethyl)pyrrolidine	[M+H]+	C11H16N2	Phenylalkylamines	MCHWKJRTMPIHRA-UHFFFAOYSA-N	c(c2)ccc(c2)NCC(C1)NCC1	3.1889	1.14e-09	1.65692
752	Positive	13.787	735.639	Unknown	[M+H]+	null	null	null	null	0.02833	1.14e-09	1.56943
753	Positive	1.023	830.865	Unknown	[M+H]+	null	null	null	null	10.921	1.15e-09	1.65083
754	Positive	16.448	758.637	Unknown	[M+H]+	null	null	null	null	0.0039806	1.19e-09	1.81371
755	Positive	16.551	758.626	Unknown	[M+H]+	null	null	null	null	0.0066641	1.2e-09	1.76491
756	Positive	9.343	611.286	low score: (S)-ethyl 4-(4-((7-acetamido-1,2,3-trimethoxy-9-oxo-5,6,7,9-tetrahydrobenzo[a]heptalen-10-yl)amino)butanoyl)piperazine-1-carboxylate	[M+H]+	C32H42N4O8	Gamma amino acids and derivatives	SJHHSDDZARIHAT-DEOSSOPVSA-N	O=C(OCC)N1CCN(C(=O)CCCNC2=CC=C3C4=C(OC)C(OC)=C(OC)C=C4CCC(NC(=O)C)C3=CC2=O)CC1	28.164	1.22e-09	1.67848
757	Positive	1.027	864.868	Unknown	[M+H]+	null	null	null	null	5.8966	1.22e-09	1.43066
758	Positive	0.878	155.987	Unknown	[M+H]+	null	null	null	null	0.15785	1.26e-09	1.81383
759	Positive	9.652	629.357	low score: Lopinavir	[M+H]+	C37H48N4O5	Valine and derivatives	KJHKTHWMRKYKJE-SUGCFTRWSA-N	Cc1cccc(c1OCC(=O)N[C@@H](Cc2ccccc2)[C@H](C[C@H](Cc3ccccc3)NC(=O)[C@H](C(C)C)N4CCCNC4=O)O)C	0.05406	1.26e-09	1.75316
760	Positive	19.736	776.299	low score: methyl (2S,3R,4S)-3-ethenyl-4-[(Z)-3-[(2S,3R,4R)-3-ethenyl-5-methoxycarbonyl-2-[(2S,3R,4S,5S,6R)-3,4,5-trihydroxy-6-(hydroxymethyl)oxan-2-yl]oxy-3,4-dihydro-2H-pyran-4-yl]-4-oxobut-2-enyl]-2-[(2S,3R,4S,5S,6R)-3,4,5-trihydroxy-6-(hydroxymethyl)oxan-2-yl]oxy-3,4-dihydro-2H-pyran-5-carboxylate	[M+NH4]+	C34H46O19	Terpene glycosides	MWLKXILGJPSPKZ-LWSBBEHMSA-N	O=CC(=CCC1C(=COC(OC2OC(CO)C(O)C(O)C2O)C1C=C)C(=O)OC)C3C(=COC(OC4OC(CO)C(O)C(O)C4O)C3C=C)C(=O)OC	0.027029	1.26e-09	1.38659
761	Positive	19.048	521.418	Unknown	[M+H]+	null	null	null	null	0.075011	1.27e-09	1.56178
762	Positive	9.255	494.837	Unknown	[M+H]+	null	null	null	null	0.07688	1.27e-09	1.48389
763	Positive	14.908	780.626	Unknown	[M+H]+	null	null	null	null	0.048665	1.28e-09	1.69139
764	Positive	1.844	412.864	Unknown	[M+H]+	null	null	null	null	13.162	1.29e-09	1.52512
765	Positive	1.035	880.797	Unknown	[M+H]+	null	null	null	null	9.3455	1.29e-09	1.52489
766	Positive	1.033	894.773	Unknown	[M+H]+	null	null	null	null	9.6638	1.29e-09	1.48846
767	Positive	0.947	144.113	(2R)-6-methylpiperidine-2-carboxylic acid	[M+H]+	C7H13NO2	L-alpha-amino acids	IHLDCUQUFBWSJU-PRJDIBJQSA-N	O=C(O)C1NC(C)CCC1	0.085703	1.3e-09	1.40852
768	Positive	1.274	882.627	Unknown	[M+H]+	null	null	null	null	0.05648	1.32e-09	1.65627
769	Positive	9.592	438.34	low score: tomatidine	[M+Na]+	C27H45NO2	Spirosolanes and derivatives	XYNPYHXGMWJBLV-JYAGXCGRSA-N	OC1CCC2(C)C(CCC3C2CCC4(C)C3CC5OC6(NCC(C)CC6)C(C)C54)C1	0.05472	1.34e-09	1.49322
770	Positive	17.536	492.442	Unknown	[M+H]+	null	null	null	null	0.038565	1.43e-09	1.42505
771	Positive	8.298	277.206	Unknown	[M+H]+	null	null	null	null	0.14358	1.47e-09	1.78608
772	Positive	16.71	329.271	low score: 2,4-dihydroxyheptadec-16-enyl acetate	[M+H]+	C19H36O4	Long-chain fatty alcohols	NLBYRERHXBTBBR-UHFFFAOYSA-N	O=C(OCC(O)CC(O)CCCCCCCCCCCC=C)C	0.069055	1.52e-09	1.56658
773	Positive	13.697	654.392	Unknown	[M+H]+	null	null	null	null	0.026583	1.55e-09	1.75587
774	Positive	1.016	240.985	low score: Thiram	[M+H]+	C6H12N2S4	Thiuram disulfides	KUAZQDVKQLNFPE-UHFFFAOYSA-N	CN(C)C(=S)SSC(=S)N(C)C	0.16617	1.56e-09	1.44973
775	Positive	14.532	780.621	Unknown	[M+H]+	null	null	null	null	0.091194	1.58e-09	1.35423
776	Positive	9.504	239.185	Unknown	[M+H]+	null	null	null	null	0.20315	1.59e-09	1.49161
777	Positive	0.461	247.842	Unknown	[M+H]+	null	null	null	null	41.104	1.6e-09	1.58996
778	Positive	1.026	692.863	Unknown	[M+H]+	null	null	null	null	9.0417	1.6e-09	1.57788
779	Positive	8.123	504.335	low score: glutamate conjugated chenodeoxycholic acid	[M-H2O+H]+	C29H47NO7	Glycinated bile acids and derivatives	MHOZNCAVRHAOKT-PYDJSGOHSA-N	O=C(O)CCC(N=C(O)CCC(C)C1CCC2C3C(O)CC4CC(O)CCC4(C)C3CCC12C)C(=O)O	0.013954	1.61e-09	1.74227
780	Positive	15.026	284.321	Unknown	[M+H]+	null	null	null	null	0.0935	1.61e-09	1.69092
781	Positive	1.039	742.855	Unknown	[M+H]+	null	null	null	null	5.2462	1.61e-09	1.52615
782	Positive	8.2	518.362	low score: ORLISTAT	[M+Na]+	C29H53NO5	Leucine and derivatives	AHLBNYSZXLDEJQ-FWEHEUNISA-N	CCCCCCCCCCC[C@@H](C[C@@H]1OC(=O)[C@H]1CCCCCC)OC(=O)[C@H](CC(C)C)NC=O	0.10397	1.62e-09	1.63631
783	Positive	10.864	555.4	Unknown	[M+H]+	null	null	null	null	0.088834	1.65e-09	1.5186
784	Positive	14.635	444.418	low score: (1R,3aR,5aR,5bR,9S,11aR)-3a,5a,5b,8,8,11a-hexamethyl-1-prop-1-en-2-yl-1,2,3,4,5,6,7,7a,9,10,11,11b,12,13,13a,13b-hexadecahydrocyclopenta[a]chrysen-9-ol	[M+NH4]+	C30H50O	Triterpenoids	MQYXUWHLBZFQQO-KIIHVYTKSA-N	OC1CCC2(C)C(CCC3(C)C2CCC4C5C(C(=C)C)CCC5(C)CCC43C)C1(C)C	0.048486	1.72e-09	1.46416
785	Positive	11.533	552.439	Unknown	[M+H]+	null	null	null	null	0.12021	1.77e-09	1.48648
786	Positive	1.066	914.842	Unknown	[M+H]+	null	null	null	null	5.3685	1.8e-09	1.61222
787	Positive	1.051	720.846	Unknown	[M+H]+	null	null	null	null	4.4365	1.88e-09	1.45436
788	Positive	1.267	489.151	no MS2: NCGC00381275-02!(2,5-dibenzoyloxy-1,6-dihydroxycyclohex-3-en-1-yl)methyl benzoate	[M+H]+	C28H24O8	Benzoic acid esters	UEYWXBQABUNMMN-UHFFFAOYSA-N	OC1C(OC(=O)C2=CC=CC=C2)C=CC(OC(=O)C3=CC=CC=C3)C1(O)COC(=O)C4=CC=CC=C4	22.792	1.91e-09	1.73991
789	Positive	1.035	868.769	Unknown	[M+H]+	null	null	null	null	36.631	1.94e-09	1.64064
790	Positive	0.432	141.995	Unknown	[M+H]+	null	null	null	null	33.192	2e-09	1.49301
791	Positive	8.124	486.313	low score: "N-((4R)-4-((3R,5S,7S,9S,10S,13R,14S,17R)-3,7-dihydroxy-10,13-dimethylhexadecahydro-1H-cyclopenta[a]phenanthren-17-yl)pentanoyl)-N-methylglycine"	[M+H-2H2O]+	C27H45NO5	Glycinated bile acids and derivatives	YZYBIGOLMMAZFK-IMLYGNJHSA-N	C[C@H](CCC(N(CC(O)=O)C)=O)[C@H]1CC[C@H]2[C@]([C@@H]3CC[C@@]21C)([H])[C@@H](O)C[C@@]4([H])[C@]3(C)CC[C@@H](O)C4	0.054235	2e-09	1.5901
792	Positive	11.928	300.31	Unknown	[M+H]+	null	null	null	null	0.016022	2.06e-09	1.77445
793	Positive	8.736	592.387	no MS2: Edpetiline	[M+Na]+	C33H53NO8	Steroidal saponins	DHQFYEJMFMYGCV-UHFFFAOYSA-N	O=C1CC2C3CCC4C(CN5CC(C)CCC5C4(O)C)C3CC2C6(C)CCC(OC7OC(CO)C(O)C(O)C7O)CC16	0.17412	2.06e-09	1.6194
794	Positive	0.44	257.851	Unknown	[M+H]+	null	null	null	null	26.755	2.12e-09	1.70094
795	Positive	11.968	420.348	Unknown	[M+H]+	null	null	null	null	0.049316	2.12e-09	1.57408
796	Positive	9.414	437.41	Unknown	[M+H]+	null	null	null	null	0.029909	2.12e-09	1.52715
797	Positive	18.112	576.526	Unknown	[M+H]+	null	null	null	null	0.044672	2.16e-09	1.54729
798	Positive	18.316	512.55	Unknown	[M+H]+	null	null	null	null	0.0040147	2.17e-09	1.76003
799	Positive	19.361	824.576	Unknown	[M+H]+	null	null	null	null	0.070022	2.18e-09	1.72344
800	Positive	1.04	948.794	Unknown	[M+H]+	null	null	null	null	14.735	2.19e-09	1.45646
801	Positive	1.037	994.728	Unknown	[M+H]+	null	null	null	null	20.058	2.19e-09	1.44958
802	Positive	8.51	324.316	Unknown	[M+H]+	null	null	null	null	0.047661	2.21e-09	1.41712
803	Positive	11.972	530.394	Unknown	[M+H]+	null	null	null	null	0.0027211	2.23e-09	1.60118
804	Positive	9.178	504.352	low score: NCGC00380972-01_C32H45N3O2_	[M+H]+	C32H45N3O2	Pyrroloindoles	IXMZEPKYPFQFJN-QNFIBVQNSA-N	CC(C)C[C@@H]1NC(=O)[C@@H]2C[C@]34C[C@@H]5[C@@]6(C)CCCC(C)(C)C6CC[C@@]5(C)N([C@H]3N2C1=O)C7=CC=CC=C47	0.090084	2.25e-09	1.57903
805	Positive	12.085	263.26	Unknown	[M+H]+	null	null	null	null	0.078671	2.25e-09	1.46389
806	Positive	1.073	916.699	Unknown	[M+H]+	null	null	null	null	13.859	2.25e-09	1.44858
807	Positive	1.043	926.731	Unknown	[M+H]+	null	null	null	null	20.243	2.25e-09	1.54904
808	Positive	18.883	708.572	Unknown	[M+H]+	null	null	null	null	0.047898	2.26e-09	1.93873
809	Positive	1.047	844.808	Unknown	[M+H]+	null	null	null	null	6.7725	2.28e-09	1.57037
810	Positive	1.104	840.678	Unknown	[M+H]+	null	null	null	null	4.9837	2.29e-09	1.49438
811	Positive	13.351	421.289	low score: (1S,4S,5R,9S,10R,13R,14R)-14-hydroxy-5,9-dimethyl-14-{[(3-methylbutanoyl)oxy]methyl}tetracyclo[11.2.1.0?,??.0?,?]hexadecane-5-carboxylic acid	[M+H]+	C25H40O5	Kaurane diterpenoids	FIOZUJXSEZUYCS-MTSAZYMTSA-N	O=C(OCC1(O)CC23CCC4C(C(=O)O)(C)CCCC4(C)C3CCC1C2)CC(C)C	0.085277	2.32e-09	1.68606
812	Positive	1.257	445.116	no MS2: [(2R,3R,4R,5R)-2-(2,4-dioxopyrimidin-1-yl)-4-hydroxy-5-(hydroxymethyl)oxolan-3-yl] 2,4-dimethoxy-6-methylbenzoate	[M+Na]+	C19H22N2O9	Pyrimidine nucleosides	DOVSRUBRIYLZCI-BASLNEPJSA-N	O=C(OC1C(O)C(OC1N2C=CC(O)=NC2=O)CO)C=3C(OC)=CC(OC)=CC3C	15.807	2.33e-09	1.62159
813	Positive	0.806	186.968	Unknown	[M+H]+	null	null	null	null	18.721	2.36e-09	1.60037
814	Positive	1.017	886.831	Unknown	[M+H]+	null	null	null	null	21.991	2.39e-09	1.77198
815	Positive	12.633	904.668	Unknown	[M+H]+	null	null	null	null	0.011308	2.39e-09	1.66285
816	Positive	1.262	126.032	TAURINE	[M+H]+	C2H7NO3S	Organosulfonic acids	XOAAWQZATWQOTB-UHFFFAOYSA-N	C(CS(=O)(=O)O)N	4.7624	2.4e-09	1.49773
817	Positive	14.248	638.554	Unknown	[M+H]+	null	null	null	null	0.028411	2.5e-09	1.75809
818	Positive	8.124	437.232	low score: Nonaethylene glycol	[M+Na]+	C18H38O10	Polyethylene glycols	YZUUTMGDONTGTN-UHFFFAOYSA-N	OCCOCCOCCOCCOCCOCCOCCOCCOCCO	0.010468	2.51e-09	1.77408
819	Positive	12.515	377.292	Unknown	[M+H]+	null	null	null	null	0.049304	2.51e-09	1.61534
820	Positive	8.675	675.344	low score: tert-butyl (1-(4-((7-acetamido-1,2,3-trimethoxy-9-oxo-5,6,7,9-tetrahydrobenzo[a]heptalen-10-yl)amino)butanoyl)piperidin-4-yl)carbamate	[M+Na]+	C35H48N4O8	Gamma amino acids and derivatives	IREXLBYIZXPNNP-UHFFFAOYSA-N	O=C(OC(C)(C)C)NC1CCN(C(=O)CCCNC2=CC=C3C4=C(OC)C(OC)=C(OC)C=C4CCC(NC(=O)C)C3=CC2=O)CC1	0.074074	2.51e-09	1.56909
821	Positive	14.918	832.659	Unknown	[M+H]+	null	null	null	null	0.067098	2.51e-09	1.74829
822	Positive	12.698	482.447	low score: Lactosyl(?) C12 Ceramide	[M+H]+	C30H59NO3	Ceramides	HXFPPRPLRSPNIB-VARSQMIESA-N	CCCCCCCCCCCCC/C=C/[C@H]([C@H](CO)NC(=O)CCCCCCCCCCC)O	0.12301	2.54e-09	1.40976
823	Positive	8.118	415.248	low score: NCGC00385486-01_C25H34O5_2-Butenoic acid, 2-methyl-, (2R,3R,5R)-2,6,6,9-tetramethyl-11-oxotricyclo[5.4.0.0~2,8~]undec-9-ene-3,5-diyl ester, (2Z,2'Z)-	[M+H]+	C25H34O5	Bicyclic monoterpenoids	GXMVUJPIUWLNDG-MJJXSLNDSA-N	C\C=C(C)/C(=O)O[C@@H]1C[C@@H](OC(=O)\C(C)=C/C)[C@]2(C)C\3C(C2C(=O)\C=C3C)C1(C)C	0.0068289	2.61e-09	1.69392
824	Positive	0.382	175.121	Arginine	[M+H]+	C6H14N4O2	L-alpha-amino acids	ODKSFYDXXFIFQN-UHFFFAOYSA-N	C(CC(C(=O)O)N)CN=C(N)N	5.9376	2.66e-09	1.79497
825	Positive	1.166	279.179	low score: Bakuchiol	[M+Na]+	C18H24O	Aromatic monoterpenoids	LFYJSSARVMHQJB-QIXNEVBVSA-N	OC1=CC=C(C=C1)C=CC(C=C)(C)CCC=C(C)C	0.16556	2.7e-09	1.59028
826	Positive	0.443	210.926	Unknown	[M+H]+	null	null	null	null	18.218	2.7e-09	1.69245
827	Positive	16.714	429.405	low score: Epifriedelanol	[M+H]+	C30H52O	Triterpenoids	XCDQFROEGGNAER-PFOIMGGJSA-N	OC1CCC2C(C)(CCC3C2(C)CCC4(C)C5CC(C)(C)CCC5(C)CCC34C)C1C	0.036062	2.7e-09	1.51973
828	Positive	1.002	269.028	no MS2: Visnagin	[M+K]+	C13H10O4	Furanochromones	NZVQLVGOZRELTG-UHFFFAOYSA-N	O=C1C=C(OC=2C=C3OC=CC3=C(OC)C12)C	0.059624	2.73e-09	1.44411
829	Positive	13.478	655.545	Unknown	[M+H]+	null	null	null	null	0.011526	2.76e-09	1.57319
830	Positive	0.819	193.942	Unknown	[M+H]+	null	null	null	null	14.221	2.77e-09	1.55033
831	Positive	10.865	850.602	Unknown	[M+H]+	null	null	null	null	0.040628	2.85e-09	1.55208
832	Positive	1.053	914.797	Unknown	[M+H]+	null	null	null	null	7.1681	2.86e-09	1.43601
833	Positive	0.778	146.946	Unknown	[M+H]+	null	null	null	null	12.459	2.92e-09	1.30224
834	Positive	17.408	648.586	low score: Solanesol_major	[M+NH4]+	C45H74O	Polyprenols	AFPLNGZPBSKHHQ-MEGGAXOGSA-N	CC(C)=CCCC(C)=CCCC(C)=CCCC(C)=CCCC(C)=CCCC(C)=CCCC(C)=CCCC(C)=CCCC(C)=CCO	0.046797	2.93e-09	1.52781
835	Positive	1.066	778.811	Unknown	[M+H]+	null	null	null	null	6.4282	2.98e-09	1.54912
836	Positive	13.474	419.343	no MS2: "(3R,5S,7R,9S,10S,12S,13R,14S,17R)-17-((2R)-7-hydroxy-6-methylheptan-2-yl)-10,13-dimethylhexadecahydro-1H-cyclopenta[a]phenanthrene-3,7,12-triol"	[M-H2O+H]+	C27H48O4	Tetrahydroxy bile acids, alcohols and derivatives	XJZGNVBLVFOSKJ-XZULNKEGSA-N	C[C@H](CCCC(C)CO)[C@H]1CC[C@H]2[C@]3([H])[C@H](O)C[C@@H]4C[C@H](O)CC[C@]4(C)[C@H]3C[C@H](O)[C@@]21C	0.20823	3.04e-09	1.52934
837	Positive	1.022	448.957	Unknown	[M+H]+	null	null	null	null	0.056208	3.04e-09	1.31044
838	Positive	1.04	808.844	Unknown	[M+H]+	null	null	null	null	5.6769	3.04e-09	1.45955
839	Positive	1.089	698.789	Unknown	[M+H]+	null	null	null	null	6.2891	3.08e-09	1.48716
840	Positive	3.427	205.113	low score: 1-[4-hydroxy-3-(3-methylbut-2-enyl)phenyl]ethanone	[M+NH4]+	C13H16O2	Alkyl-phenylketones	QJAPFSSVKIZTMR-UHFFFAOYSA-N	O=C(C1=CC=C(O)C(=C1)CC=C(C)C)C	0.14853	3.08e-09	1.47054
841	Positive	9.303	586.358	Unknown	[M+H]+	null	null	null	null	0.060735	3.14e-09	1.6976
842	Positive	0.561	231.875	Unknown	[M+H]+	null	null	null	null	29.741	3.18e-09	1.6139
843	Positive	7.915	272.283	Unknown	[M+H]+	null	null	null	null	0.022044	3.2e-09	1.79529
844	Positive	0.419	318.872	Unknown	[M+H]+	null	null	null	null	37.797	3.25e-09	1.52224
845	Positive	8.116	432.275	low score: NCGC00381130-01!methyl (2E,8E)-9-[3a-hydroxy-6,7-dimethyl-1-(2-methylpropyl)-3-oxo-2,4,7,7a-tetrahydro-1H-isoindol-4-yl]-4,5-dihydroxy-8-methylnona-2,8-dienoate [IIN-based on: CCMSLIB00000846918]	[M-H2O+H]+	C25H39NO6	Bicyclic monoterpenoids	YUXUTEAAGHFKKH-MKQCFFQWSA-N	COC(=O)\\C=C\\C(O)C(O)CC\\C(C)=C\\C1C=C(C)C(C)C2C(CC(C)C)NC(=O)C12O	0.002826	3.28e-09	1.7406
846	Positive	9.663	496.384	no MS2: 1-O-hexadecyl-2-C-methyl-3-phosphatidylcholine	[M+H]+	C25H54NO6P	Glycerophosphocholines	BZLKOORCGCYQJZ-UHFFFAOYSA-N	CCCCCCCCCCCCCCCCOCC(C)(COP(=O)([O-])OCC[N+](C)(C)C)O	0.065973	3.3e-09	1.47343
847	Positive	1.255	399.108	no MS2: (2R,3R,4S,5S,6R)-2-[3-hydroxy-2-(4-hydroxy-3-methoxyphenyl)propoxy]-6-(hydroxymethyl)oxane-3,4,5-triol	[M+K]+	C16H24O9	O-glycosyl compounds	REHZVRNVHQFBAF-YLHHEPAUSA-N	OC1=CC=C(C=C1OC)C(CO)COC2OC(CO)C(O)C(O)C2O	35.901	3.35e-09	1.56445
848	Positive	0.044	136.031	no MS2: 2-Benzoxazolinone; CE0; ASSKVPFEZFQQNQ-UHFFFAOYSA-N	[M+H]+	C7H5NO2	Benzoxazolones	ASSKVPFEZFQQNQ-UHFFFAOYSA-N	c1ccc2c(c1)nc(O)o2	3.012	3.38e-09	1.4415
849	Positive	1.531	324.246	low score: Melophlin B/C/G/K/L/N/O	[M+H]+	C19H33NO3	N-alkylpyrrolidines	WBPPODSRZVXVJK-MSUUIHNZSA-N	CCCCCCCCCCCC/C(O)=C(C1=O)\C(C(N1C)C)=O	0.11509	3.44e-09	1.51576
850	Positive	1.052	688.797	no MS2: (G)(NAM)-AemA;(G-G)-(NAG)(NAM)-None	[M+2H]2+	C54H89N9O32	N-acyl-alpha-hexosamines	AFRRQLYJLLLTBC-UHFFFAOYSA-N	CC(=O)NC1C(OC2C(CO)OC(O)C(NC(C)=O)C2OC(C)C(=O)O)OC(CO)C(OC2OC(CO)C(OC3OC(CO)C(O)C(O)C3N)C(OC(C)C(=O)NC(C)C(=O)NC(CCC(=O)NC(CCCC(N)C(=O)O)C(=O)NC(C)C(=O)O)C(=O)O)C2NC(C)=O)C1O	10.494	3.44e-09	1.50694
851	Positive	1.063	706.824	Unknown	[M+H]+	null	null	null	null	6.2065	3.45e-09	1.49412
852	Positive	0.428	298.899	Unknown	[M+H]+	null	null	null	null	14.994	3.48e-09	1.5924
853	Positive	1.064	936.812	Unknown	[M+H]+	null	null	null	null	6.4985	3.51e-09	1.5801
854	Positive	16.66	576.506	Unknown	[M+H]+	null	null	null	null	0.051852	3.57e-09	1.61353
855	Positive	1.305	371.124	low score: Ajugol	[M+ACN+Na]+	C15H24O9	Iridoid O-glycosides	VELYAQRXBJLJAK-XKKWFBPMSA-N	OCC1OC(OC2OC=CC3C(O)CC(O)(C)C23)C(O)C(O)C1O	5.5327	3.59e-09	1.60469
856	Positive	1.034	744.816	no MS2: (NAG)(NAM)-AqKA[3-NH2-d];(G-G)-(NAG)(NAM)-None	[M+2H]2+	C59H97N11O33	N-acyl-alpha-hexosamines	PUBIWGIXQMKBGY-UHFFFAOYSA-N	CC(=O)NC1C(OC2C(CO)OC(OC3C(CO)OC(OC4C(CO)OC(O)C(NC(C)=O)C4OC(C)C(=O)O)C(NC(C)=O)C3O)C(NC(C)=O)C2OC(C)C(=O)NC(C)C(=O)NC(CCC(=O)NC(CCCCNC(=O)CC(N)C(=O)O)C(=O)NC(C)C(=O)O)C(N)=O)OC(CO)C(O)C1O	6.1979	3.59e-09	1.57997
857	Positive	0.426	248.881	Unknown	[M+H]+	null	null	null	null	157.06	3.63e-09	1.5651
858	Positive	8.247	239.182	Unknown	[M+H]+	null	null	null	null	0.24636	3.63e-09	1.42511
859	Positive	1.272	451.062	Unknown	[M+H]+	null	null	null	null	21.189	3.66e-09	1.66226
860	Positive	0.444	296.885	Unknown	[M+H]+	null	null	null	null	35.23	3.74e-09	1.54047
861	Positive	9.005	603.353	low score: (1S,2S,5R,7R,10S,11S,14R,16R,19S,20S,23R,25R)-5,14-diethyl-2,11,20,23-tetramethyl-4,13,22,28,29,30-hexaoxatetracyclo[23.2.1.1?,??.1??,??]triacontane-3,12,21-trione	[M+Na]+	C32H52O9	Macrolides and analogues	MXZXIBZNZUOHER-VHWZNAHMSA-N	O=C1OC(C)CC2OC(CC2)C(C(=O)OC(CC)CC3OC(CC3)C(C(=O)OC(CC)CC4OC(CC4)C1C)C)C	0.14092	3.74e-09	1.42958
862	Positive	0.378	784.649	Unknown	[M+H]+	null	null	null	null	0.039255	3.77e-09	1.69166
863	Positive	1.282	169.05	no MS2: METHYGLUTARATE	[M+Na]+	C6H10O4	Methyl-branched fatty acids	XJMMNTGIMDZPMU-UHFFFAOYSA-N	CC(CC(O)=O)CC(O)=O	8.8222	3.79e-09	1.65852
864	Positive	17.145	585.325	low score: lappaconitine	[M+H]+	C32H44N2O8	Lappaconitine-type diterpenoid alkaloids	NWBWCXBPKTTZNQ-GSAAXPBRSA-N	O=C(OC12CN(CC)C3C4CC1C3(C(OC)CC2)C5CC6C(OC)CC4(O)C5(O)C6OC)C=7C=CC=CC7NC(=O)C	0.017544	3.96e-09	1.71039
865	Positive	8.696	524.317	low score: Aspartate conjugated cholic acid	[M+H]+	C28H45NO8	Glycinated bile acids and derivatives	VMFFESMCXOCOIZ-NCLBRSMESA-N	C[C@H](CCC(N[C@@H](CC(O)=O)C(O)=O)=O)[C@H]1CC[C@@]2([H])[C@]3([H])[C@H](O)C[C@]4([H])C[C@H](O)CC[C@]4(C)[C@H]3C[C@H](O)[C@@]21C	0.13596	3.96e-09	1.61079
866	Positive	13.016	420.243	low score: Phytosphingosine-1-P	[M+Na]+	C18H40NO6P	Phosphosphingolipids	AYGOSKULTISFCW-KZNAEPCWSA-N	CCCCCCCCCCCCCC[C@H]([C@@H]([C@@H](COP(=O)(O)O)N)O)O	0.057084	4.09e-09	1.84
867	Positive	9.683	431.351	Unknown	[M+H]+	null	null	null	null	0.10042	4.12e-09	1.64052
868	Positive	1.206	267.154	Sambucinol	[M+H]+	C15H22O4	Oxepanes	GFLMBFRNOPTZDK-CMBQYIQPSA-N	CC1=C[C@]23[C@](CC1)([C@]4(C[C@@H]([C@H]([C@]4(O2)CO)O3)O)C)C	0.14611	4.25e-09	1.45227
869	Positive	1.032	936.764	Unknown	[M+H]+	null	null	null	null	25.435	4.27e-09	1.60357
870	Positive	1.038	676.822	Unknown	[M+H]+	null	null	null	null	5.361	4.33e-09	1.6306
871	Positive	9.344	688.342	low score: Acetylaconitine	[M+H]+	C36H49NO12	Aconitane-type diterpenoid alkaloids	RIPYIJVYDYCPKW-WEVHBWGYSA-N	CCN1CC2(COC)[C@H]3C(OC)C4[C@@H]1C3([C@@H]1C[C@@]3(O)C(OC(=O)C5=CC=CC=C5)[C@@H]1[C@]4(OC(C)=O)C(O)[C@@H]3OC)C(CC2OC(C)=O)OC	0.036194	4.33e-09	1.37846
872	Positive	0.793	350.353	Unknown	[M+H]+	null	null	null	null	0.22714	4.39e-09	1.38245
873	Positive	1.06	814.763	Unknown	[M+H]+	null	null	null	null	6.1745	4.5e-09	1.61516
874	Positive	16.278	758.633	Unknown	[M+H]+	null	null	null	null	0.0048886	4.61e-09	1.77453
875	Positive	11.972	543.39	low score: 3-[(3-OH-myristoyl)oxy]decanoyl glutamine from Cohen et al Nature 549 48 53 2017	[M+H]+	C29H54N2O7	Glutamine and derivatives	SGROMIWARYNAJQ-UHFFFAOYSA-N	O=C(CC(OC(CC(O)CCCCCCCCCCC)=O)CCCCCCC)NC(CCC(N)=O)C(O)=O	0.011802	4.64e-09	1.57672
876	Positive	0.443	312.881	Unknown	[M+H]+	null	null	null	null	32.987	4.69e-09	1.64462
877	Positive	0.958	163.072	no MS2: 3-Hydroxy-3-methylglutarate	[M+H]+	C6H10O5	Hydroxy fatty acids	NPOAOTPXWNWTSH-UHFFFAOYSA-N	OC(=O)CC(C)(O)CC(O)=O	0.10816	4.7e-09	1.34693
878	Positive	12.079	355.32	Unknown	[M+H]+	null	null	null	null	0.078631	4.8e-09	1.67339
879	Positive	17.769	675.735	Unknown	[M+H]+	null	null	null	null	0.0034876	4.87e-09	1.6071
880	Positive	0.07	139.121	low score: Isophorone	[M+H]+	C9H14O	Cyclohexenones	HJOVHMDZYOCNQW-UHFFFAOYSA-N	CC1=CC(=O)CC(C)(C)C1	2.4308	4.92e-09	1.52772
881	Positive	14.557	136.032	Benzothiazole	[M+H]+	C7H5NS	Benzothiazoles	IOJUPLGTWVMSFF-UHFFFAOYSA-N	N1=CSC=2C=CC=CC12	4.5956	4.93e-09	1.5842
882	Positive	0.431	279.879	Unknown	[M+H]+	null	null	null	null	89.078	4.94e-09	1.68645
883	Positive	11.264	375.284	low score: NCGC00380376-01_C22H40O3_1-Naphthalenepentanol, decahydro-2-hydroxy-gamma,2,5,5,8a-pentamethyl-, alpha-acetate	[M+Na]+	C22H40O3	Diterpenoids	NZKLGQRMNDHSPV-UHFFFAOYSA-N	CC(CCOC(C)=O)CCC1C(C)(O)CCC2C(C)(C)CCCC12C	0.04641	5.03e-09	1.63423
884	Positive	12.757	526.472	Unknown	[M+H]+	null	null	null	null	0.15334	5.03e-09	1.28241
885	Positive	1.035	852.838	Unknown	[M+H]+	null	null	null	null	13.144	5.07e-09	1.48206
886	Positive	0.459	112.956	Unknown	[M+H]+	null	null	null	null	70.971	5.11e-09	1.44539
887	Positive	10.88	716.365	low score: (4E)-4-[3-[4,5-dihydroxy-6-(hydroxymethyl)-3-[3,4,5-trihydroxy-6-(hydroxymethyl)oxan-2-yl]oxyoxan-2-yl]oxy-14-hydroxy-10,13-dimethyl-2,3,4,5,6,7,8,9,11,12,15,16-dodecahydro-1H-cyclopenta[a]phenanthren-17-ylidene]oxolan-2-one	[M+NH4]+	C35H54O14	Steroidal glycosides	NRQCIBSGSINRCF-KNTRCKAVSA-N	O=C1OCC(=C2CCC3(O)C4CCC5CC(OC6OC(CO)C(O)C(O)C6OC7OC(CO)C(O)C(O)C7O)CCC5(C)C4CCC23C)C1	0.037585	5.11e-09	1.59226
888	Positive	1.077	610.778	Unknown	[M+H]+	null	null	null	null	4.5237	5.11e-09	1.48265
889	Positive	1.037	700.827	Unknown	[M+H]+	null	null	null	null	10.626	5.18e-09	1.36053
890	Positive	16.144	758.635	Unknown	[M+H]+	null	null	null	null	0.004654	5.2e-09	1.72493
891	Positive	0.843	107.958	Unknown	[M+H]+	null	null	null	null	20.989	5.25e-09	1.63898
892	Positive	0.702	361.848	Unknown	[M+H]+	null	null	null	null	17.918	5.27e-09	1.44309
893	Positive	6.355	223.079	no MS2: 2-methylanthra-9,10-quinone	[M+H]+	C15H10O2	Anthraquinones	NJWGQARXZDRHCD-UHFFFAOYSA-N	O=C1C=2C=CC=CC2C(=O)C3=CC(=CC=C13)C	4.5944	5.27e-09	1.61439
894	Positive	9.656	805.071	low score: Leptosin A_130037	[M+H]+	C32H32N6O7S6	Pyrroloindoles	HEIXSBSYEOOAIS-DNVIVPPASA-N	[H][C@@]1(O)[C@@](C(N(C)[C@]2(C(C)C)C3=O)=O)(SS2)N3[C@@]4([H])NC5=C([C@]41[C@]67C8=C(N[C@@]6([H])N(C([C@](CO)(SSSS9)N(C)C%10=O)=O)[C@]%109[C@]7(O)[H])C=CC=C8)C=CC=C5	0.0039966	5.27e-09	1.55987
895	Positive	0.668	412.861	Unknown	[M+H]+	null	null	null	null	11.846	5.33e-09	1.51959
896	Positive	0.426	121.975	Unknown	[M+H]+	null	null	null	null	18.933	5.36e-09	1.40412
897	Positive	14.536	806.639	Unknown	[M+H]+	null	null	null	null	0.10942	5.36e-09	1.33842
898	Positive	10.54	402.391	Unknown	[M+H]+	null	null	null	null	0.053683	5.42e-09	1.46736
899	Positive	1.072	918.704	Unknown	[M+H]+	null	null	null	null	7.4576	5.47e-09	1.56554
900	Positive	8.407	301.169	low score: adrenosterone	[M+H]+	C19H24O3	Androgens and derivatives	RZRPTBIGEANTGU-IRIMSJTPSA-N	O=C1C=C2CCC3C(C(=O)CC4(C(=O)CCC34)C)C2(C)CC1	0.24425	5.48e-09	1.44715
901	Positive	0.427	234.903	Unknown	[M+H]+	null	null	null	null	75.523	5.91e-09	1.61703
902	Positive	0.44	251.954	Unknown	[M+H]+	null	null	null	null	19.706	6e-09	1.58308
903	Positive	1.053	816.753	Unknown	[M+H]+	null	null	null	null	11.037	6.03e-09	1.45766
904	Positive	13.763	534.503	Unknown	[M+H]+	null	null	null	null	0.027215	6.04e-09	1.55518
905	Positive	1.033	934.766	Unknown	[M+H]+	null	null	null	null	20.746	6.06e-09	1.46419
906	Positive	13.485	783.643	Unknown	[M+H]+	null	null	null	null	0.070034	6.11e-09	1.49696
907	Positive	7.866	332.191	mahanimbine	[M+H]+	C23H25NO	Carbazoles	HTNVFUBCWIYPJN-QHCPKHFHSA-N	O1C=2C(C=CC1(C)CCC=C(C)C)=C3NC=4C=CC=CC4C3=CC2C	0.073168	6.27e-09	1.69016
908	Positive	13.346	713.578	Unknown	[M+H]+	null	null	null	null	0.010467	6.33e-09	1.47698
909	Positive	0.708	324.866	Unknown	[M+H]+	null	null	null	null	14.082	6.37e-09	1.54586
910	Positive	7.646	239.184	Unknown	[M+H]+	null	null	null	null	0.2028	6.4e-09	1.39683
911	Positive	16.041	758.636	Unknown	[M+H]+	null	null	null	null	0.0054257	6.48e-09	1.82722
912	Positive	1.094	696.798	Unknown	[M+H]+	null	null	null	null	2.8248	6.54e-09	1.40197
913	Positive	1.02	980.828	Unknown	[M+H]+	null	null	null	null	8.0339	6.54e-09	1.59101
914	Positive	12.515	372.337	low score: NCGC00380102-01!3-hexadecyl-4-methoxy-5-methyloxolan-2-one	[M+NH4]+	C22H42O3	Gamma butyrolactones	DJNFXUFERDZHCD-UHFFFAOYSA-N	CCCCCCCCCCCCCCCCC1C(OC)C(C)OC1=O	0.16972	6.77e-09	1.54455
915	Positive	0.734	241.903	Unknown	[M+H]+	null	null	null	null	43.888	6.82e-09	1.70998
916	Positive	14.308	806.646	Unknown	[M+H]+	null	null	null	null	0.14914	6.82e-09	1.41489
917	Positive	0.436	267.905	Unknown	[M+H]+	null	null	null	null	23.181	6.89e-09	1.66412
918	Positive	0.428	316.874	Unknown	[M+H]+	null	null	null	null	25.248	6.89e-09	1.45166
919	Positive	9.003	534.328	low score: 9-hydroxy-5b,8,11a-trimethyl-1-prop-1-en-2-yl-1,2,3,4,5,6,7,7a,9,10,11,11b,12,13,13a,13b-hexadecahydrocyclopenta[a]chrysene-3a,5a,8-tricarboxylic acid	[M+NH4]+	C30H44O7	Triterpenoids	FTGKHGAVFGGOMW-UHFFFAOYSA-N	O=C(O)C12CCC(C(=C)C)C2C3CCC4C5(C)CCC(O)C(C(=O)O)(C)C5CCC4(C)C3(C(=O)O)CC1	5.6315	6.97e-09	1.54238
920	Positive	6.16	712.891	Unknown	[M+H]+	null	null	null	null	0.11552	7.05e-09	1.33037
921	Positive	1.04	892.776	Unknown	[M+H]+	null	null	null	null	10.084	7.06e-09	1.55791
922	Positive	8.109	564.358	low score: NCGC00381435-01!13-dodecan-2-yl-6-(1-hydroxyethyl)-3-(hydroxymethyl)-12-methyl-9-propan-2-yl-1-oxa-4,7,10-triazacyclotridecane-2,5,8,11-tetrone [IIN-based on: CCMSLIB00000848775]	[M+Na]+	C28H51N3O7	Cyclic depsipeptides	PVAWVKQDYYTSIE-UHFFFAOYSA-N	CCCCCCCCCCC(C)C1OC(=O)C(CO)NC(=O)C(NC(=O)C(NC(=O)C1C)C(C)C)C(C)O	0.056244	7.07e-09	1.38883
923	Positive	9.705	560.349	Unknown	[M+H]+	null	null	null	null	0.072325	7.1e-09	1.63402
924	Positive	13.461	353.293	Unknown	[M+H]+	null	null	null	null	0.0027591	7.48e-09	1.45774
925	Positive	0.638	300.846	Unknown	[M+H]+	null	null	null	null	37.084	7.5e-09	1.58909
926	Positive	11.047	280.187	low score: Etamiphylline	[M+H]+	C13H21N5O2	Xanthines	AWKLBIOQCIORSB-UHFFFAOYSA-N	[H]C([H])([H])C([H])([H])N(C([H])([H])C([H])([H])[H])C([H])([H])C([H])([H])n(c([H])2)c(C(=O)1)c(n2)N(C([H])([H])[H])C(=O)N(C([H])([H])[H])1	0.24209	7.52e-09	1.46575
927	Positive	1.049	992.724	Unknown	[M+H]+	null	null	null	null	8.4545	7.68e-09	1.42981
928	Positive	1.097	504.843	Unknown	[M+H]+	null	null	null	null	4.7829	7.69e-09	1.51478
929	Positive	15.519	734.714	Unknown	[M+H]+	null	null	null	null	0.028661	7.72e-09	1.33873
930	Positive	0.443	237.881	Unknown	[M+H]+	null	null	null	null	28.624	7.73e-09	1.53496
931	Positive	9.663	612.381	low score: NCGC00384824-01!methyl 3-hydroxy-2-[[3-hydroxy-2-[[2-[(3-hydroxy-2,4-dimethyltetradecanoyl)amino]-3-methylbutanoyl]amino]butanoyl]amino]propanoate [IIN-based on: CCMSLIB00000848076]	[M+K]+	C29H55N3O8	Peptides	AKMKWHBDPUOPSK-UHFFFAOYSA-N	CCCCCCCCCCC(C)C(O)C(C)C(=O)NC(C(C)C)C(=O)NC(C(C)O)C(=O)NC(CO)C(=O)OC	0.048828	7.77e-09	1.69398
932	Positive	17.81	371.346	Unknown	[M+H]+	null	null	null	null	0.21869	7.77e-09	1.30954
933	Positive	1.074	496.883	Unknown	[M+H]+	null	null	null	null	0.21778	7.8e-09	1.42654
934	Positive	1.039	948.836	Unknown	[M+H]+	null	null	null	null	7.2288	7.83e-09	1.62794
935	Positive	1.042	912.8	Unknown	[M+H]+	null	null	null	null	9.4244	7.89e-09	1.46759
936	Positive	2.257	100.075	N-Methyl-2-pyrrolidone	[M+H]+	C5H9NO	N-alkylpyrrolidines	SECXISVLQFMRJM-UHFFFAOYSA-N	CN1CCCC1=O	14.53	7.93e-09	1.69427
937	Positive	1.256	206.106	no MS2: 1-phenylisoquinoline	[M+H]+	C15H11N	Phenylpyridines	LPCWDYWZIWDTCV-UHFFFAOYSA-N	C12=CC=CC=C1C=CN=C2C3=CC=CC=C3	0.42882	7.97e-09	1.34204
938	Positive	1.893	193.944	Unknown	[M+H]+	null	null	null	null	15.757	8.04e-09	1.58903
939	Positive	0.536	132.941	Unknown	[M+H]+	null	null	null	null	51.811	8.13e-09	1.60083
940	Positive	0.77	293.876	Unknown	[M+H]+	null	null	null	null	111.31	8.18e-09	1.79846
941	Positive	10.423	616.216	no MS2: NCGC00385154-01!4-[3-[(2S,3R,4S,5S,6R)-6-[[(2R,3R,4R)-3,4-dihydroxy-4-(hydroxymethyl)oxolan-2-yl]oxymethyl]-3,4,5-trihydroxyoxan-2-yl]oxy-2-hydroxy-3-methylbutoxy]furo[3,2-g]chromen-7-one [IIN-based on: CCMSLIB00000848662]	[M+NH4]+	C27H34O15	Psoralens	WHICJDPSYBJDEN-NQXQTLPHSA-N	CC(C)(O[C@@H]1O[C@H](CO[C@@H]2OC[C@](O)(CO)[C@H]2O)[C@@H](O)[C@H](O)[C@H]1O)C(O)COC3=C4C=CC(=O)OC4=CC5=C3C=CO5	0.036765	8.56e-09	1.58506
942	Positive	0.809	149.953	Unknown	[M+H]+	null	null	null	null	19.543	8.59e-09	1.62893
943	Positive	1.057	868.824	Unknown	[M+H]+	null	null	null	null	8.0354	8.8e-09	1.49908
944	Positive	0.793	201.022	low score: Meglutol	[M+K]+	C6H10O5	Hydroxy fatty acids	NPOAOTPXWNWTSH-UHFFFAOYSA-N	O=C(O)CC(O)(C)CC(=O)O	5.3313	8.83e-09	1.42056
945	Positive	0.491	308.815	Unknown	[M+H]+	null	null	null	null	54.905	8.97e-09	1.6922
946	Positive	0.427	322.817	Unknown	[M+H]+	null	null	null	null	29.451	8.97e-09	1.60188
947	Positive	1.068	722.751	Unknown	[M+H]+	null	null	null	null	17.339	9.04e-09	1.51954
948	Positive	6.474	460.308	Unknown	[M+H]+	null	null	null	null	3.7356	9.06e-09	1.43481
949	Positive	9.552	279.252	Unknown	[M+H]+	null	null	null	null	0.11001	9.19e-09	1.39036
950	Positive	0.427	358.796	Unknown	[M+H]+	null	null	null	null	31.139	9.27e-09	1.6443
951	Positive	17.023	401.373	low score: Campesterol	[M+H]+	C28H48O	Ergosterols and derivatives	SGNBVLSWZMBQTH-ZRUUVFCLSA-N	OC1CC2=CCC3C(CCC4(C)C(CCC34)C(C)CCC(C)C(C)C)C2(C)CC1	0.034634	9.43e-09	1.54395
952	Positive	12.375	337.304	Unknown	[M+H]+	null	null	null	null	0.030742	9.48e-09	1.6163
953	Positive	18.259	758.636	Unknown	[M+H]+	null	null	null	null	0.050174	9.54e-09	1.88069
954	Positive	1.043	958.827	Unknown	[M+H]+	null	null	null	null	5.1797	9.86e-09	1.4947
955	Positive	8.123	488.34	Unknown	[M+H]+	null	null	null	null	0.046307	9.96e-09	1.58427
956	Positive	1.088	780.718	Unknown	[M+H]+	null	null	null	null	7.7474	1.01e-08	1.57331
957	Positive	0.711	213.903	Unknown	[M+H]+	null	null	null	null	35.097	1.02e-08	1.69483
958	Positive	0.425	285.866	Unknown	[M+H]+	null	null	null	null	41.261	1.04e-08	1.556
959	Positive	0.638	109.951	Unknown	[M+H]+	null	null	null	null	22.417	1.06e-08	1.38901
960	Positive	0.548	302.823	Unknown	[M+H]+	null	null	null	null	250.48	1.06e-08	1.71683
961	Positive	0.423	368.822	Unknown	[M+H]+	null	null	null	null	61.905	1.06e-08	1.53714
962	Positive	12.221	396.345	low score: N-Oleyl-Leucine	[M+H]+	C24H45NO3	Leucine and derivatives	UMOAAMQGRRCHPA-GJCOWUBNSA-N	CCCCCCCC/C=C\CCCCCCCC(=O)N[C@@H](CC(C)C)C(=O)O	0.045118	1.07e-08	1.4764
963	Positive	0.509	124.963	Unknown	[M+H]+	null	null	null	null	59.316	1.12e-08	1.485
964	Positive	1.142	241.171	no MS2: 3,3',5,5'-Tetramethylbenzidine	[M+H]+	C16H20N2	Benzidines	UAIUNKRWKOVEES-UHFFFAOYSA-N	CC1=CC(=CC(C)=C1N)C1=CC(C)=C(N)C(C)=C1	0.23781	1.12e-08	1.47424
965	Positive	12.979	313.298	low score: icosanoic acid	[M+H-H2O]+	C20H40O2	Long-chain fatty acids	VKOBVWXKNCXXDE-UHFFFAOYSA-N	O=C(O)CCCCCCCCCCCCCCCCCCC	0.097118	1.14e-08	1.65079
966	Positive	0.418	462.183	no MS2: Morphine_3_Glucuronide	[M+H]+	C23H27NO9	Morphinans	WAEXKFONHRHFBZ-UHFFFAOYSA-N	[H]OC(=O)C([H])(O1)C([H])(O[H])C([H])(O[H])C([H])(O[H])C([H])(Oc(c([H])6)c(O5)c(c(c([H])6)2)C(C([H])([H])3)(C([H])54)C([H])(C([H])=C([H])C([H])(O[H])4)C([H])(N(C([H])([H])[H])C([H])([H])3)C([H])([H])2)1	0.14627	1.14e-08	1.49137
967	Positive	16.588	531.447	Unknown	[M+H]+	null	null	null	null	0.070186	1.15e-08	1.56826
968	Positive	1.064	552.814	Unknown	[M+H]+	null	null	null	null	7.071	1.16e-08	1.51672
969	Positive	2.09	324.245	no MS2: Melophlin B/C/G/K/L/N/O	[M+H]+	C19H33NO3	N-alkylpyrrolidines	WBPPODSRZVXVJK-MSUUIHNZSA-N	CCCCCCCCCCCC/C(O)=C(C1=O)\C(C(N1C)C)=O	0.1359	1.17e-08	1.47786
970	Positive	1.087	572.841	Unknown	[M+H]+	null	null	null	null	5.7495	1.18e-08	1.36487
971	Positive	8.265	466.359	Unknown	[M+H]+	null	null	null	null	0.14135	1.19e-08	1.46205
972	Positive	0.303	759.633	Unknown	[M+H]+	null	null	null	null	0.090726	1.19e-08	1.77002
973	Positive	11.001	388.247	low score: (1r,5R,7S)-5,7-diethyl-2-(1-ethyl-2-methyl-1H-indol-3-yl)-1,3-diazaadamantan-6-one	[M+Na]+	C23H31N3O	N-alkylindoles	KRYFHYSXWHRZKT-BRTIRZTQSA-N	O=C1C2(CN3CC1(CN(C2)C3C=4C=5C=CC=CC5N(C4C)CC)CC)CC	0.072755	1.2e-08	1.67968
974	Positive	0.845	205.101	low score: Tryptophan	[M+H]+	C11H12N2O2	Indolyl carboxylic acids and derivatives	QIVBCDIJIAJPQS-UHFFFAOYSA-N	C1=CC=C2C(=C1)C(=CN2)CC(C(=O)O)N	0.3052	1.23e-08	1.33896
975	Positive	1.06	902.766	Unknown	[M+H]+	null	null	null	null	14.036	1.26e-08	1.31863
976	Positive	1.037	798.778	Unknown	[M+H]+	null	null	null	null	18.621	1.29e-08	1.56917
977	Positive	0.662	335.819	Unknown	[M+H]+	null	null	null	null	22.304	1.3e-08	1.56628
978	Positive	15.518	285.305	low score: N-[3-(Dimethylamino)propyl]dodecanamide	[M+H]+	C17H36N2O	N-acyl amines	TWMFGCHRALXDAR-UHFFFAOYSA-N	CCCCCCCCCCCC(=O)NCCCN(C)C	0.1189	1.3e-08	1.28833
979	Positive	15.521	758.637	Unknown	[M+H]+	null	null	null	null	0.016107	1.32e-08	1.54842
980	Negative	0.194	155.858	Unknown	[M-H]-	null	null	null	null	0.15691	1.32e-08	1.64529
981	Positive	8.125	453.21	low score: NCGC00384740-01_C21H34O9_2(1H)-Azulenone, 6-(beta-D-glucopyranosyloxy)-4,5,6,7,8,8a-hexahydro-5-hydroxy-5-(1-hydroxy-1-methylethyl)-3,8-dimethyl-	[M+Na]+	C21H34O9	Terpene glycosides	HVAVGMDRUJHUOH-UURFWDJCSA-N	CC1CC(O[C@@H]2O[C@H](CO)[C@@H](O)[C@H](O)[C@H]2O)C(O)(CC/3=C(C)/C(=O)CC13)C(C)(C)O	0.012384	1.33e-08	1.64456
982	Positive	7.315	226.199	Unknown	[M+H]+	null	null	null	null	0.23386	1.36e-08	1.38739
983	Positive	12.599	171.109	no MS2: Levetiracetam	[M+H]+	C8H14N2O2	Alpha amino acids and derivatives	HPHUVLMMVZITSG-LURJTMIESA-N	O=C1N(CCC1)C(C(=N)O)CC	15.746	1.37e-08	1.60715
984	Positive	10.311	343.188	low score: 9-phenyl-1-(2,4,6-trihydroxyphenyl)nonan-1-one	[M+H]+	C21H26O4	Alkyl-phenylketones	OOGZWXIAHJKVAH-UHFFFAOYSA-N	O=C(C=1C(O)=CC(O)=CC1O)CCCCCCCCC=2C=CC=CC2	0.11901	1.37e-08	1.61234
985	Positive	13.021	403.317	low score: "(3R,7R,8R,9S,10S,12S,13R,14S,17R)-17-((2R,5R)-5,7-dihydroxyheptan-2-yl)-10,13-dimethylhexadecahydro-1H-cyclopenta[a]phenanthrene-3,7,12-triol"	[M-2H2O+H]+	C26H46O5	Tetrahydroxy bile acids, alcohols and derivatives	PBXYLMVLLSYZLN-LQHTUWPVSA-N	O[C@@H](C1)CC[C@@]2(C)C1([H])C[C@@H](O)[C@]3([H])[C@]2([H])C[C@H](O)[C@@]4(C)[C@@]3([H])CC[C@@]4([C@H](C)CC[C@@H](O)CCO)[H]	0.071673	1.37e-08	1.59417
986	Positive	10.085	616.223	low score: 5,7-dihydroxy-7-methyl-1-[(2S,3R,4S,5S,6R)-3,4,5-trihydroxy-6-[[(E)-3-(4-hydroxy-3,5-dimethoxyphenyl)prop-2-enoyl]oxymethyl]oxan-2-yl]oxy-4a,5,6,7a-tetrahydro-1H-cyclopenta[c]pyran-4-carboxylic acid	[M+NH4]+	C27H34O15	Iridoid O-glycosides	DHHMFNAGLVIOCZ-LVPKXVBFSA-N	O=C(O)C1=COC(OC2OC(COC(=O)C=CC3=CC(OC)=C(O)C(OC)=C3)C(O)C(O)C2O)C4C1C(O)CC4(O)C	0.0042406	1.39e-08	1.67679
987	Positive	8.837	578.429	low score: NCGC00384949-01!2-(hydroxymethyl)-6-(2,20,21-trihydroxydocosan-3-yloxy)oxane-3,4,5-triol	[M+ACN+H]+	C28H56O9	Fatty acyl glycosides of mono- and disaccharides	IKQSIKPOUMLPKK-UHFFFAOYSA-N	CC(O)C(O)CCCCCCCCCCCCCCCCC(OC1OC(CO)C(O)C(O)C1O)C(C)O	0.088908	1.39e-08	1.55685
988	Positive	6.472	102.099	no MS2: CYCLOPENTANONE	[M+NH4]+	C5H8O	Cyclic ketones	BGTOWKSIORTVQH-UHFFFAOYSA-N	C1CCC(=O)C1	4.3933	1.4e-08	1.50826
989	Negative	0.194	153.861	Unknown	[M-H]-	null	null	null	null	0.16612	1.4e-08	1.61557
990	Positive	0.665	280.187	low score: Tramadol N-Oxide	[M+H]+	C16H25NO3	Anisoles	HBXKSXMNNGHBEA-UHFFFAOYSA-N	COC1=CC=CC(=C1)C1(O)CCCCC1C[N+](C)(C)[O-]	0.21908	1.43e-08	1.42688
991	Positive	1.042	942.881	Unknown	[M+H]+	null	null	null	null	5.1622	1.43e-08	1.51232
992	Positive	1.034	766.824	Unknown	[M+H]+	null	null	null	null	9.9372	1.44e-08	1.55713
993	Positive	1.062	792.744	Unknown	[M+H]+	null	null	null	null	8.2119	1.51e-08	1.47838
994	Positive	0.665	389.843	Unknown	[M+H]+	null	null	null	null	28.148	1.55e-08	1.5144
995	Positive	0.468	290.847	Unknown	[M+H]+	null	null	null	null	31.76	1.57e-08	1.32881
996	Positive	14.712	431.416	Unknown	[M+H]+	null	null	null	null	0.019921	1.59e-08	1.37034
997	Positive	1.147	207.028	low score: Methyl gallate	[M+Na]+	C8H8O5	Galloyl esters	FBSFWRHWHYMIOG-UHFFFAOYSA-N	O=C(OC)C1=CC(O)=C(O)C(O)=C1	4.0733	1.6e-08	1.62835
998	Positive	12.509	755.504	Unknown	[M+H]+	null	null	null	null	9.4073	1.64e-08	1.49518
999	Positive	8.223	506.37	Unknown	[M+H]+	null	null	null	null	0.11913	1.65e-08	1.57426
1000	Positive	8.54	634.264	Unknown	[M+H]+	null	null	null	null	14.035	1.68e-08	1.74264
1001	Positive	8.707	415.25	low score: NCGC00385486-01_C25H34O5_2-Butenoic acid, 2-methyl-, (2R,3R,5R)-2,6,6,9-tetramethyl-11-oxotricyclo[5.4.0.0~2,8~]undec-9-ene-3,5-diyl ester, (2Z,2'Z)-	[M+H]+	C25H34O5	Bicyclic monoterpenoids	GXMVUJPIUWLNDG-MJJXSLNDSA-N	C\C=C(C)/C(=O)O[C@@H]1C[C@@H](OC(=O)\C(C)=C/C)[C@]2(C)C\3C(C2C(=O)\C=C3C)C1(C)C	0.038311	1.68e-08	1.59676
1002	Positive	1.305	465.079	low score: Epicatechin gallate	[M+Na]+	C22H18O10	Catechin gallates	LSHVYAFMTMFKBA-TZIWHRDSSA-N	O=C(OC1CC=2C(O)=CC(O)=CC2OC1C3=CC=C(O)C(O)=C3)C4=CC(O)=C(O)C(O)=C4	9.6218	1.68e-08	1.47346
1003	Positive	1.03	336.194	no MS2: NCGC00380786-01!3-methoxy-4-(3-methylbut-2-enyl)-5-[(E)-2-phenylethenyl]phenol	[M+ACN+H]+	C20H22O2	Stilbenes	NFAWEPOBHKEHPO-ZHACJKMWSA-N	COC1=C(CC=C(C)C)C(\C=C\C2=CC=CC=C2)=CC(O)=C1	0.10802	1.68e-08	1.27816
1004	Positive	8.69	606.348	low score: NCGC00386085-01_C32H44O10_	[M+NH4]+	C32H44O10	Oxepanes	MPCIDUFOTGXABA-UHFFFAOYSA-N	CC1OC\23C/4=C(/C(O)C5C(C)(CCC6OC(CC(OC(C)=O)C56C)C(C)(C)O)O4)C(=O)\C=C2C(C)C(OC(C)=O)C13C	0.060965	1.7e-08	1.59769
1005	Positive	1.271	163.982	Unknown	[M+H]+	null	null	null	null	12.452	1.71e-08	1.43277
1006	Positive	12.98	331.31	low score: MMV687273	[M+H]+	C22H38N2	Monoterpenoids	JFIBVDBTCDTBRH-IDUWFGFVSA-N	C(=C(C)C)CCC(=CCNCCNC1C2CC3CC(C2)CC1C3)C	0.096421	1.71e-08	1.56382
1007	Positive	1.173	262.189	no MS2: verruculotoxin	[M+NH4]+	C15H20N2O	Alpha amino acid amides	CUANCTHYEDWUMU-KBPBESRZSA-N	OC1=NC(CC=2C=CC=CC2)CN3CCCCC13	0.13528	1.71e-08	1.35733
1008	Positive	1.051	690.797	Unknown	[M+H]+	null	null	null	null	12.905	1.71e-08	1.45358
1009	Positive	0.826	210.946	Unknown	[M+H]+	null	null	null	null	9.2079	1.74e-08	1.58418
1010	Positive	11.966	425.303	Unknown	[M+H]+	null	null	null	null	0.031082	1.75e-08	1.56162
1011	Positive	17.947	409.369	low score: cholest-5-en-3-ol	[M+Na]+	C27H46O	Cholesterols and derivatives	HVYWMOMLDIMFJA-RQOOZVDESA-N	OC1CC2=CCC3C(CCC4(C)C(CCC34)C(C)CCCC(C)C)C2(C)CC1	0.047183	1.75e-08	1.53425
1012	Positive	0.108	784.632	Unknown	[M+H]+	null	null	null	null	0.076206	1.76e-08	1.61262
1013	Positive	1.014	844.845	Unknown	[M+H]+	null	null	null	null	5.2156	1.76e-08	1.31435
1014	Positive	1.023	876.804	no MS2: Triacylglycerol 16:0-18:1-18:1	[M+NH4]+	C55H102O6	Triacylglycerols	GVEDTRDLMYCMDC-QEEMTAIZSA-N	C(=CCCCCCCCCCCCCC)CCC(=O)OC(COC(CCC=CCCCCCCCCCCCCC)=O)COC(=O)CCCCCCCCCCCCCCC	30.04	1.78e-08	1.57277
1015	Positive	9.967	468.342	low score: Xefoampeptide D	[M+H]+	C25H45N3O5	Cyclic depsipeptides	VYFBCKJPZMCFAW-LSNYBQGISA-N	O=C1NC(C(C)(C)C)C(OC(CCCC)CC(N[C@H](CC(C)C)C(N[C@H]1CC(C)C)=O)=O)=O	0.19545	1.79e-08	1.5769
1016	Positive	12.512	411.257	low score: "(R)-4-((5S,8S,9S,10R,13R,14S,17R)-10,13-dimethyl-3,6-dioxohexadecahydro-1H-cyclopenta[a]phenanthren-17-yl)pentanoic acid"	[M+Na]+	C24H36O4	Bile acids, alcohols and derivatives	AWINBLVINXVKTE-DLKBGQMWSA-N	C[C@@H]([C@H]1CC[C@]2([H])[C@]1(C)CC[C@@]3([H])[C@@]2([H])CC([C@]4([H])[C@]3(C)CCC(C4)=O)=O)CCC(O)=O	8.1198	1.8e-08	1.47329
1017	Positive	10.492	606.33	low score: NCGC00386085-01_C32H44O10_	[M+NH4]+	C32H44O10	Oxepanes	MPCIDUFOTGXABA-UHFFFAOYSA-N	CC1OC\23C/4=C(/C(O)C5C(C)(CCC6OC(CC(OC(C)=O)C56C)C(C)(C)O)O4)C(=O)\C=C2C(C)C(OC(C)=O)C13C	44.091	1.81e-08	1.61737
1018	Positive	0.425	256.874	Unknown	[M+H]+	null	null	null	null	56.63	1.83e-08	1.58231
1019	Positive	1.051	790.743	Unknown	[M+H]+	null	null	null	null	17.29	1.83e-08	1.63378
1020	Positive	6.44	444.275	no MS2: Nakijiquinone B	[M+H]+	C26H37NO5	Valine and derivatives	HREPKYSNTPRGQR-UHFFFAOYSA-N	CC(C(NC(C(C(CC1(C)C(C)CCC2(C)C(C)=CCCC21)=C3O)=O)=CC3=O)C(O)=O)C	2.0258	1.9e-08	1.41712
1021	Positive	0.597	129.944	Unknown	[M+H]+	null	null	null	null	52.742	1.91e-08	1.57216
1022	Positive	17.701	659.546	Unknown	[M+H]+	null	null	null	null	0.079371	1.93e-08	1.64964
1023	Positive	1.041	960.77	Unknown	[M+H]+	null	null	null	null	9.9487	1.94e-08	1.38244
1024	Positive	11.972	502.362	Unknown	[M+H]+	null	null	null	null	0.015022	1.96e-08	1.48969
1025	Positive	1.089	782.717	Unknown	[M+H]+	null	null	null	null	6.1528	1.96e-08	1.45612
1026	Positive	1.046	492.897	Unknown	[M+H]+	null	null	null	null	0.20885	1.97e-08	1.32656
1027	Positive	1.034	776.85	Unknown	[M+H]+	null	null	null	null	9.7581	1.97e-08	1.44418
1028	Positive	14.644	782.625	Unknown	[M+H]+	null	null	null	null	0.094439	1.98e-08	1.29207
1029	Positive	7.809	603.35	low score: Canthaxanthin (Euglenanone)	[M+K]+	C40H52O2	Xanthophylls	FDSDTBUPSURDBL-DKLMTRRASA-N	O=C1C(=C(C=CC(=CC=CC(=CC=CC=C(C=CC=C(C=CC2=C(C(=O)CCC2(C)C)C)C)C)C)C)C(C)(C)CC1)C	0.065952	2.01e-08	1.63756
1030	Positive	1.082	738.727	Unknown	[M+H]+	null	null	null	null	6.5537	2.07e-08	1.4319
1031	Positive	0.426	370.82	Unknown	[M+H]+	null	null	null	null	102.33	2.11e-08	1.57789
1032	Positive	10.128	532.433	Unknown	[M+H]+	null	null	null	null	0.076356	2.11e-08	1.45322
1033	Positive	8.891	494.358	no MS2: Threonine conjugated chenodeoxycholic acid	[M+H]+	C28H47NO6	Glycinated bile acids and derivatives	FDLBWFQZCBIUPV-JPWRXKRQSA-N	C[C@H](CCC(N[C@@H]([C@@H](C)O)C(O)=O)=O)[C@H]1CC[C@@]2([H])[C@]3([H])[C@H](O)C[C@]4([H])C[C@H](O)CC[C@]4(C)[C@H]3CC[C@@]21C	0.11525	2.11e-08	1.45317
1034	Positive	1.236	195.14	no MS2: 5-isopropenyl-2-methyl-2-cyclohexen-1-yl acetate	[M+H]+	C12H18O2	Menthane monoterpenoids	YTHRBOFHFYZBRJ-VXGBXAGGSA-N	O=C(OC1C(=CCC(C(=C)C)C1)C)C	0.18546	2.17e-08	1.3921
1035	Positive	12.814	256.285	Unknown	[M+H]+	null	null	null	null	0.13132	2.18e-08	1.22011
1036	Positive	0.685	274.073	no MS2: Tolcapone	[M+H]+	C14H11NO5	Benzophenones	MIQPIUSUKVNLNT-UHFFFAOYSA-N	C1(C(C2=CC=C(C=C2)C)=O)C=C(C(=C(C=1)O)O)[N+](=O)[O-]	14.343	2.24e-08	1.64398
1037	Positive	9.114	223.079	low score: Cystathionine	[M+H]+	C7H14N2O4S	L-cysteine-S-conjugates	ILRYLPWNYFXEMH-WHFBIAKZSA-N	OC(=O)[C@@H](N)CCSC[C@@H](N)C(O)=O	6.5084	2.26e-08	1.70053
1038	Positive	1.093	150.988	Unknown	[M+H]+	null	null	null	null	3.431	2.29e-08	1.4802
1039	Positive	13.556	576.384	low score: Unknown (carbon number 33); PlaSMA ID-2912	[M+H]+	C33H53NO7	Unknown	null	null	0.012593	2.29e-08	1.58743
1040	Positive	11.97	485.332	low score: NCGC00385760-01!(2S,3S,9R,13R,14S,16R)-2,3,16-trihydroxy-17-[(2R)-2-hydroxy-6-methyl-3-oxohept-6-en-2-yl]-4,4,9,13,14-pentamethyl-1,2,3,7,8,10,12,15,16,17-decahydrocyclopenta[a]phenanthren-11-one [IIN-based on: CCMSLIB00000848112]	[M-H2O+H]+	C30H46O6	Cucurbitacins	JQKLZAQSMGFZSI-NRFHFCOISA-N	CC(=C)CCC(=O)[C@](C)(O)C1[C@H](O)C[C@@]2(C)C3CC=C4C(C[C@H](O)[C@@H](O)C4(C)C)[C@]3(C)C(=O)C[C@]12C	0.014191	2.29e-08	1.4584
1041	Positive	1.02	944.796	Unknown	[M+H]+	null	null	null	null	17.871	2.32e-08	1.60959
1042	Positive	10.222	605.352	Unknown	[M+H]+	null	null	null	null	12.707	2.35e-08	1.48097
1043	Positive	1.024	808.808	Unknown	[M+H]+	null	null	null	null	31.465	2.36e-08	1.71143
1044	Positive	13.212	311.189	low score: (5S)-10,13-dimethyldodecahydro-1H-cyclopenta[a]phenanthrene-3,17(2H,4H)-dione	[M+Na]+	C19H28O2	Androgens and derivatives	RAJWOBJTTGJROA-PLFHKJOISA-N	O=C1CCC2(C)C(C1)CCC3C4CCC(=O)C4(C)CCC32	0.13512	2.38e-08	1.74373
1045	Positive	0.425	228.872	Unknown	[M+H]+	null	null	null	null	14.534	2.43e-08	1.6355
1046	Positive	6.065	328.235	low score: (3R,5S,17R)-17-hydroxy-10,13-dimethylhexadecahydro-1H-cyclopenta[a]phenanthren-3-aminium chloride	[M+H]+	C19H34ClNO	Androstane steroids	GYQZNNAZXVKYOR-YHGFUEDJSA-N	[Cl-].OC1CCC2C3CCC4CC([NH3+])CCC4(C)C3CCC12C	3.4723	2.44e-08	1.18741
1047	Positive	14.533	804.623	Unknown	[M+H]+	null	null	null	null	0.071366	2.46e-08	1.68037
1048	Positive	11.208	572.407	Unknown	[M+H]+	null	null	null	null	0.12622	2.49e-08	1.51192
1049	Positive	0.757	236.85	Unknown	[M+H]+	null	null	null	null	33.57	2.51e-08	1.50324
1050	Positive	1.026	762.875	Unknown	[M+H]+	null	null	null	null	16.373	2.51e-08	1.42664
1051	Positive	0.241	309.226	low score: h_88_stanozolol_4b_oh	[M-2H2O+H]+	C21H32N2O2	Estrane steroids	OCUSYXNRARMJHS-JQPLYGKBSA-N	C[C@](O)(CC1)[C@@]2(C)[C@@H]1[C@H](CC[C@@H]3[C@]4(C)CC5=CNN=C5C3O)[C@@H]4CC2	3.7208	2.54e-08	1.41405
1052	Positive	1.04	614.889	Unknown	[M+H]+	null	null	null	null	4.4338	2.58e-08	1.25955
1053	Positive	0.443	247.938	Unknown	[M+H]+	null	null	null	null	39.016	2.62e-08	1.29669
1054	Positive	8.631	460.311	Unknown	[M+H]+	null	null	null	null	0.038999	2.65e-08	1.53802
1055	Positive	1.059	984.698	Unknown	[M+H]+	null	null	null	null	11.44	2.66e-08	1.43323
1056	Positive	1.023	794.881	Unknown	[M+H]+	null	null	null	null	11.368	2.69e-08	1.39717
1057	Positive	11.25	485.325	low score: NCGC00385760-01!(2S,3S,9R,13R,14S,16R)-2,3,16-trihydroxy-17-[(2R)-2-hydroxy-6-methyl-3-oxohept-6-en-2-yl]-4,4,9,13,14-pentamethyl-1,2,3,7,8,10,12,15,16,17-decahydrocyclopenta[a]phenanthren-11-one [IIN-based on: CCMSLIB00000848112]	[M-H2O+H]+	C30H46O6	Cucurbitacins	JQKLZAQSMGFZSI-NRFHFCOISA-N	CC(=C)CCC(=O)[C@](C)(O)C1[C@H](O)C[C@@]2(C)C3CC=C4C(C[C@H](O)[C@@H](O)C4(C)C)[C@]3(C)C(=O)C[C@]12C	31.581	2.7e-08	1.47546
1058	Positive	1.088	484.823	Unknown	[M+H]+	null	null	null	null	4.5554	2.7e-08	1.41486
1059	Positive	1.037	758.788	Unknown	[M+H]+	null	null	null	null	9.9495	2.7e-08	1.30648
1060	Positive	14.91	804.62	Unknown	[M+H]+	null	null	null	null	0.046645	2.73e-08	1.713
1061	Positive	13.789	339.323	Unknown	[M+H]+	null	null	null	null	0.053731	2.76e-08	1.70035
1062	Positive	1.051	620.807	Unknown	[M+H]+	null	null	null	null	9.8493	2.76e-08	1.55016
1063	Positive	0.748	128.96	Unknown	[M+H]+	null	null	null	null	100.64	2.79e-08	1.73029
1064	Positive	1.012	514.914	Unknown	[M+H]+	null	null	null	null	6.2773	2.84e-08	1.47749
1065	Positive	0.427	364.787	Unknown	[M+H]+	null	null	null	null	57.602	2.85e-08	1.51553
1066	Positive	1.017	954.825	Unknown	[M+H]+	null	null	null	null	21.26	2.89e-08	1.61762
1067	Positive	1.052	622.801	Unknown	[M+H]+	null	null	null	null	7.4285	2.91e-08	1.44073
1068	Positive	6.596	463.281	low score: Methyl-mappain	[M+H]+	C30H38O4	Stilbenes	MRXGJOGASBBDTM-FVFOHYRDSA-N	C/C(C)=C\CC/C(C)=C/CC1=C(C(OC)=CC(/C=C/C2=CC(O)=C(C(O)=C2)C/C=C(C)\C)=C1)O	5.9549	2.93e-08	1.46802
1069	Positive	1.032	866.77	Unknown	[M+H]+	null	null	null	null	18.66	2.93e-08	1.49956
1070	Positive	13.417	421.284	low score: Cholest-4,6-Dien-3-One	[M+K]+	C27H42O	Cholesterols and derivatives	XIWMRKFKSRYSIJ-GYKMGIIDSA-N	O=C1C=C2C=CC3C(CCC4(C)C3CCC4C(C)CCCC(C)C)C2(C)CC1	0.10307	2.95e-08	1.58082
1071	Positive	1.072	720.762	Unknown	[M+H]+	null	null	null	null	7.5041	2.95e-08	1.48601
1072	Positive	12.522	472.247	no MS2: 11,12-dihydroxy-13-methoxy-4,5,8-trimethyl-3-(2-methylpropyl)-1H,2H,3H,4H,6aH,9H,10H,11H,12H,13H,14H,15H,15bH-cycloundeca[e]isoindole-1,15-dione	[M+K]+	C25H39NO5	Isoindolones	VMCFTVWDHVWSOB-UHFFFAOYSA-N	O=C1CC(OC)C(O)C(O)CCC(=CC2C=C(C)C(C)C3C(N=C(O)C123)CC(C)C)C	14.288	3e-08	1.32659
1073	Positive	0.97	145.06	low score: 3-hydroxy-4-methoxy-2,3-dihydropyran-6-one	[M+H-H2O]+	C6H8O4	Dihydropyranones	PBEXSRJMCVDBFK-UHFFFAOYSA-N	O=C1OCC(O)C(OC)=C1	0.15687	3.01e-08	1.47199
1074	Positive	1.273	239.035	low score: 4-methoxy-7H-furo[3,2-g]chromen-7-one	[M+Na]+	C12H8O4	5-methoxypsoralens	BGEBZHIAGXMEMV-UHFFFAOYSA-N	O=C1OC=2C=C3OC=CC3=C(OC)C2C=C1	49.542	3.04e-08	1.63079
1075	Positive	15.531	769.626	Unknown	[M+H]+	null	null	null	null	0.060115	3.06e-08	1.42574
1076	Positive	1.035	800.778	Unknown	[M+H]+	null	null	null	null	28.61	3.1e-08	1.70859
1077	Positive	17.466	780.613	Unknown	[M+H]+	null	null	null	null	0.071039	3.11e-08	1.76046
1078	Positive	1.032	904.801	Unknown	[M+H]+	null	null	null	null	7.67	3.16e-08	1.3953
1079	Positive	12.931	351.254	low score: NCGC00385642-01!1,4-dihydroxyheptadec-16-en-2-yl acetate [IIN-based on: CCMSLIB00000845027]	[M+Na]+	C19H36O4	Long-chain fatty alcohols	LUIGTZGBXWZJAX-UHFFFAOYSA-N	CC(=O)OC(CO)CC(O)CCCCCCCCCCCC=C	0.12777	3.18e-08	1.58468
1080	Positive	11.219	572.425	Unknown	[M+H]+	null	null	null	null	0.092442	3.2e-08	1.66347
1081	Positive	0.709	277.877	Unknown	[M+H]+	null	null	null	null	15.899	3.2e-08	1.46131
1082	Positive	1.748	193.945	Unknown	[M+H]+	null	null	null	null	14.39	3.21e-08	1.54727
1083	Positive	15.52	780.622	Unknown	[M+H]+	null	null	null	null	0.066692	3.22e-08	1.67944
1084	Positive	1.056	882.749	Unknown	[M+H]+	null	null	null	null	7.9774	3.23e-08	1.41164
1085	Positive	12.512	425.21	low score: Benazepril	[M+H]+	C24H28N2O5	Dipeptides	XPCFTKFZXHTYIP-PMACEKPBSA-N	O=C(O)CN1C(=O)C(NC(C(=O)OCC)CCC=2C=CC=CC2)CCC=3C=CC=CC31	28.013	3.25e-08	1.31801
1086	Positive	16.502	223.079	no MS2: 2-methylanthra-9,10-quinone	[M+H]+	C15H10O2	Anthraquinones	NJWGQARXZDRHCD-UHFFFAOYSA-N	O=C1C=2C=CC=CC2C(=O)C3=CC(=CC=C13)C	16.495	3.26e-08	1.68972
1087	Positive	1.035	366.943	Unknown	[M+H]+	null	null	null	null	0.19134	3.27e-08	1.34081
1088	Positive	8.416	494.359	Unknown	[M+H]+	null	null	null	null	0.076007	3.33e-08	1.29606
1089	Positive	1.258	524.132	no MS2: 2-(3-(3-(3,4-dimethoxyphenyl)-4,8-dioxo-4,8,9,10-tetrahydropyrano[2,3-f]chromen-10-yl)phenoxy)acetamide	[M+Na]+	C28H23NO8	Pyranoisoflavonoids	IUQOJESNSFQLHI-UHFFFAOYSA-N	O=C1OC2=CC=C3C(=O)C(=COC3=C2C(C=4C=CC=C(OCC(=O)N)C4)C1)C=5C=CC(OC)=C(OC)C5	33.322	3.34e-08	1.64585
1090	Positive	1.04	710.851	Unknown	[M+H]+	null	null	null	null	5.1882	3.38e-08	1.32883
1091	Positive	10.816	124.096	HISTIDINOL	[M-H2O+H]+	C6H11N3O	Aralkylamines	ZQISRDCJNBUVMM-YFKPBYRVSA-N	N[C@H](CO)CC1=CN=CN1	4.3685	3.4e-08	1.52539
1092	Positive	1.098	846.716	Unknown	[M+H]+	null	null	null	null	7.2081	3.42e-08	1.26597
1093	Positive	10.77	426.393	low score: N-Octanoylsphingosine,D-erythro	[M+H]+	C26H51NO3	Ceramides	APDLCSPGWPLYEQ-WRBRXSDHSA-N	CCCCCCCCCCCCCC=CC(C(CO)NC(=O)CCCCCCC)O	0.058422	3.48e-08	1.47735
1094	Positive	0.774	253.855	Unknown	[M+H]+	null	null	null	null	81.301	3.5e-08	1.71238
1095	Positive	0.431	246.881	Unknown	[M+H]+	null	null	null	null	112.99	3.51e-08	1.56445
1096	Positive	1.039	732.781	Unknown	[M+H]+	null	null	null	null	19.35	3.53e-08	1.74397
1097	Positive	0.823	145.939	Unknown	[M+H]+	null	null	null	null	12.173	3.59e-08	1.4882
1098	Positive	13.506	362.238	Unknown	[M+H]+	null	null	null	null	0.098514	3.59e-08	1.6839
1099	Positive	1.043	824.783	no MS2: Tripalmitin	[M+H]+	C51H98O6	Triacylglycerols	PVNIQBQSYATKKL-UHFFFAOYSA-N	CCCCCCCCCCCCCCCC(=O)OCC(COC(=O)CCCCCCCCCCCCCCC)OC(=O)CCCCCCCCCCCCCCC	8.6484	3.59e-08	1.48237
1100	Positive	12.1	351.255	low score: NCGC00385642-01!1,4-dihydroxyheptadec-16-en-2-yl acetate [IIN-based on: CCMSLIB00000845027]	[M+Na]+	C19H36O4	Long-chain fatty alcohols	LUIGTZGBXWZJAX-UHFFFAOYSA-N	CC(=O)OC(CO)CC(O)CCCCCCCCCCCC=C	4.4298	3.61e-08	1.28158
1101	Positive	1.024	810.807	Unknown	[M+H]+	null	null	null	null	33.959	3.68e-08	1.63633
1102	Positive	0.763	208.959	Unknown	[M+H]+	null	null	null	null	51.687	3.72e-08	1.67429
1103	Positive	0.776	158.975	Unknown	[M+H]+	null	null	null	null	59.812	3.74e-08	1.71573
1104	Positive	0.435	249.961	Unknown	[M+H]+	null	null	null	null	24.488	3.76e-08	1.55492
1105	Positive	1.059	788.751	Unknown	[M+H]+	null	null	null	null	9.9361	3.79e-08	1.33316
1106	Positive	0.103	493.383	no MS2: 20(S),24(R)-Ocotillol	[M+H]+	C30H52O5	Triterpene saponins	XIGBHUXQOPWGDK-IAFUCFMFSA-N	OC1CC2C3(C)CCC(O)C(C)(C)C3C(O)CC2(C)C4(C)CCC(C14)C5(OC(CC5)C(O)(C)C)C	0.10803	3.84e-08	1.50922
1107	Positive	11.332	325.267	low score: NCGC00180676-03_C20H36O3_1-Naphthalenepentanoic acid, decahydro-2-hydroxy-beta,2,5,5,8a-pentamethyl-, (betaS,1R,2R,8aS)-	[M+H]+	C20H36O3	Diterpenoids	KHCCSRVJJDOANA-ZOSGAXDSSA-N	C[C@@H](CC[C@H]1[C@](C)(O)CCC2C(C)(C)CCC[C@]12C)CC(O)=O	0.049926	3.86e-08	1.46693
1108	Positive	1.067	904.765	Unknown	[M+H]+	null	null	null	null	6.4221	3.89e-08	1.46906
1109	Positive	17.327	625.513	Unknown	[M+H]+	null	null	null	null	0.071688	3.96e-08	1.42087
1110	Positive	0.427	244.846	Unknown	[M+H]+	null	null	null	null	67.874	4e-08	1.52721
1111	Positive	0.42	143.002	Unknown	[M+H]+	null	null	null	null	14.834	4.01e-08	1.47292
1112	Positive	1.076	972.761	Unknown	[M+H]+	null	null	null	null	6.8852	4.07e-08	1.33754
1113	Positive	16.088	759.636	Unknown	[M+H]+	null	null	null	null	0.022478	4.08e-08	1.84345
1114	Positive	1.235	432.891	Unknown	[M+H]+	null	null	null	null	11.67	4.1e-08	1.49762
1115	Positive	8.599	705.207	low score: Tenuifoliside A	[M+Na]+	C31H38O17	Coumaric acids and derivatives	VOZDDCMEFRAJHD-XMPZFKQGSA-N	O=C(OCC1OC(OC2(OC(CO)C(O)C2OC(=O)C3=CC=C(O)C=C3)CO)C(O)C(O)C1O)C=CC4=CC(OC)=C(OC)C(OC)=C4	22.343	4.12e-08	1.74062
1116	Positive	1.072	281.07	no MS2: Sulfameter (Bayrena)	[M+H]+	C11H12N4O3S	Aminobenzenesulfonamides	GPTONYMQFTZPKC-UHFFFAOYSA-N	C1(=CC=C(C=C1)S(NC2=NC=C(C=N2)OC)(=O)=O)N	0.26821	4.14e-08	1.45426
1117	Positive	1.072	900.77	Unknown	[M+H]+	null	null	null	null	4.4206	4.14e-08	1.34351
1118	Positive	9.412	590.272	low score: Benzoylmesaconine	[M+H]+	C31H43NO10	Aconitane-type diterpenoid alkaloids	PULWZCUZNRVAHT-PUAFOYDXSA-N	O=C(OC1C2C3CC1(O)C(OC)C(O)C2(O)C4C(OC)C5C6(COC)CN(C)C4C35C(OC)CC6O)C=7C=CC=CC7	58.871	4.15e-08	1.50726
1119	Negative	12.382	534.334	Unknown	[M-H]-	null	null	null	null	0.19998	4.15e-08	1.34361
1120	Positive	9.393	766.044	Unknown	[M+H]+	null	null	null	null	0.014783	4.22e-08	1.44945
1121	Positive	1.063	952.736	Unknown	[M+H]+	null	null	null	null	8.9426	4.36e-08	1.39625
1122	Positive	1.128	126.034	no MS2: 2-Aminoethylphosphonic acid	[M+H]+	C2H8NO3P	Organic phosphonic acids	QQVDJLLNRSOCEL-UHFFFAOYSA-N	O=P(O)(O)CCN	0.15872	4.45e-08	1.5478
1123	Positive	16.774	469.399	low score: 6a-Acetoxy-17(21)-hopene	[M+H]+	C32H52O2	Hopanoids	NLYCXKGVDFJIGS-OOJXIBOZSA-N	CC1(C)CCC[C@]2(C)[C@@]3([H])CC[C@]4([H])[C@@]5(C)CCC(C(C)C)=C5CC[C@](C)4[C@@](C)3C[C@H](OC(C)=O)C12	0.077743	4.46e-08	1.54765
1124	Positive	8.55	614.272	low score: Ferrioxamine B [M+Fe-2H]	[M+H]+	C25H45N6O8	N-acyl amines	SRMBQCVUAVULDJ-UHFFFAOYSA-N	CC(=O)N1CCCCCNC(=O)CCC(=O)N2CCCCCNC(=O)CCC(=O)N(CCCCCN)O[Fe](O1)O2	25.315	4.57e-08	1.69222
1125	Positive	0.436	310.881	Unknown	[M+H]+	null	null	null	null	16.999	4.58e-08	1.4462
1126	Positive	14.613	408.349	Unknown	[M+H]+	null	null	null	null	0.0975	4.59e-08	1.39032
1127	Negative	1.106	242.092	Unknown	[M-H]-	null	null	null	null	0.21514	4.6e-08	1.52091
1128	Positive	0.469	113.966	Unknown	[M+H]+	null	null	null	null	124.17	4.63e-08	1.42946
1129	Positive	0.913	118.095	Betaine	[M+H]+	C5H11NO2	Alpha amino acids	KWIUHFFTVRNATP-UHFFFAOYSA-N	[O-1]C(=O)C[N+1](C)(C)C	0.29134	4.67e-08	1.47193
1130	Positive	1.053	798.86	Unknown	[M+H]+	null	null	null	null	4.562	4.67e-08	1.48049
1131	Positive	1.029	810.849	Unknown	[M+H]+	null	null	null	null	6.634	4.67e-08	1.40595
1132	Positive	1.027	158.13	Homostachydrine; CE0; XULZWQRXYTVUTE-ZETCQYMHSA-N	[M+H]+	C8H15NO2	Alpha amino acids	XULZWQRXYTVUTE-ZETCQYMHSA-N	C[N+]1(C)CCCC[C@H]1C(=O)[O-]	0.09943	4.78e-08	1.48097
1133	Positive	1.26	344.058	Unknown	[M+H]+	null	null	null	null	57.849	4.82e-08	1.55834
1134	Positive	10.722	504.343	low score: NCGC00380972-01_C32H45N3O2_	[M+H]+	C32H45N3O2	Pyrroloindoles	IXMZEPKYPFQFJN-QNFIBVQNSA-N	CC(C)C[C@@H]1NC(=O)[C@@H]2C[C@]34C[C@@H]5[C@@]6(C)CCCC(C)(C)C6CC[C@@]5(C)N([C@H]3N2C1=O)C7=CC=CC=C47	0.27648	4.88e-08	1.47185
1135	Positive	10.484	680.371	no MS2: NCGC00347880-02!2-[2-[(2-acetamido-4-methylpentanoyl)amino]propanoylamino]-3-hydroxypropanoic acid [IIN-based on: CCMSLIB00000847807]	[2M+NH4]+	C14H25N3O6	Oligopeptides	OSDHWYZIXWDLGD-UHFFFAOYSA-N	CC(C)CC(NC(C)=O)C(=O)NC(C)C(=O)NC(CO)C(O)=O	20.991	4.96e-08	1.52349
1136	Positive	13.475	674.522	Unknown	[M+H]+	null	null	null	null	0.06913	4.98e-08	1.38525
1137	Positive	1.275	385.12	no MS2: MLS000574930-01!	[M+Na]+	C19H22O7	Quassinoids	SRNFRTSVHROPLE-ZUHTXRHNSA-N	C[C@@H]1[C@@H]2CC(=O)O[C@@H]3C[C@](C)([C@H]4OC(=O)C=C4C)C(=C(O)C1=O)[C@@]32CO	24.415	5.04e-08	1.405
1138	Positive	1.047	802.815	Unknown	[M+H]+	null	null	null	null	7.1686	5.05e-08	1.53775
1139	Positive	8.937	527.334	low score: madecassic acid	[M+Na]+	C30H48O6	Triterpenoids	PRAUVHZJPXOEIF-PHCWQIJGSA-N	O=C(O)C12CCC(C)C(C)C2C3=CCC4C5(C)CC(O)C(O)C(C)(CO)C5C(O)CC4(C)C3(C)CC1	9.0082	5.07e-08	1.3738
1140	Positive	6.094	224.145	no MS2: Camellimidazole D	[M+H]+	C10H17N5O	2-heteroaryl carboxamides	VTPXABIHFAGVJO-UHFFFAOYSA-N	CN1C2=C(N(CN(CN(C)C2=O)C)C)N=C1	0.26728	5.13e-08	1.4414
1141	Positive	1.048	884.745	no MS2: Triacylglycerol 17:1-18:2-18:2	[M+NH4]+	C56H98O6	Triacylglycerols	QYLNHIFWNMHHOK-JBQLTYABSA-N	C(OC(=O)CCC=CCC=CCCCCCCCCCC)(COC(=O)CCC=CCC=CCCCCCCCCCC)COC(CCC=CCCCCCCCCCCCC)=O	11.554	5.14e-08	1.45015
1142	Positive	1.061	766.85	Unknown	[M+H]+	null	null	null	null	3.3725	5.17e-08	1.39167
1143	Positive	1.034	686.85	Unknown	[M+H]+	null	null	null	null	3.4915	5.18e-08	1.5233
1144	Positive	1.088	514.875	Unknown	[M+H]+	null	null	null	null	5.754	5.32e-08	1.30886
1145	Positive	1.119	137.142	Chrysanthemyl Alcohol	[M-H2O+H]+	C10H18O	Monocyclic monoterpenoids	HIPIENNKVJCMAP-DTWKUNHWSA-N	OCC1C(C=C(C)C)C1(C)C	0.22959	5.33e-08	1.54024
1146	Positive	12.085	377.3	low score: "(4R)-4-((3R,5S,9S,10S,13R,14S,17R)-3-hydroxy-10,13-dimethylhexadecahydro-1H-cyclopenta[a]phenanthren-17-yl)pentanoic acid"	[M+H]+	C24H40O3	Monohydroxy bile acids, alcohols and derivatives	SMEROWZSTRWXGI-NWFSOSCSSA-N	C[C@@]12[C@](CC[C@]3([H])[C@@H]2CC[C@@]4(C)[C@H]3CC[C@@H]4[C@@H](CCC(O)=O)C)([H])C[C@H](O)CC1	0.05878	5.37e-08	1.5606
1147	Positive	1.031	158.975	Unknown	[M+H]+	null	null	null	null	4.3505	5.46e-08	1.68207
1148	Positive	8.621	293.233	Unknown	[M+H]+	null	null	null	null	0.42023	5.57e-08	1.38442
1149	Positive	15.501	806.621	Unknown	[M+H]+	null	null	null	null	0.15944	5.58e-08	1.25152
1150	Positive	1.071	444.962	Unknown	[M+H]+	null	null	null	null	0.31813	5.65e-08	1.34369
1151	Positive	1.041	938.808	Unknown	[M+H]+	null	null	null	null	7.1377	5.68e-08	1.44612
1152	Negative	19.738	197.801	Unknown	[M-H]-	null	null	null	null	0.43527	5.68e-08	1.47434
1153	Positive	10.755	616.31	low score: Hypaconitine	[M+H]+	C33H45NO10	Aconitane-type diterpenoid alkaloids	FIDOCHXHMJHKRW-ILSCITHTSA-N	O=C(OC1C2C3CC1(O)C(OC)C(O)C2(OC(=O)C)C4C(OC)C5C6(COC)CN(C)C4C35C(OC)CC6)C=7C=CC=CC7	55.355	5.7e-08	1.56663
1154	Positive	13.484	782.638	Unknown	[M+H]+	null	null	null	null	0.091199	5.71e-08	1.33343
1155	Positive	0.422	374.816	Unknown	[M+H]+	null	null	null	null	47.985	5.74e-08	1.41726
1156	Positive	1.065	582.866	Unknown	[M+H]+	null	null	null	null	7.1416	5.75e-08	1.47754
1157	Positive	6.242	280.183	no MS2: Sibutramine	[M+H]+	C17H26ClN	Chlorobenzenes	UNAANXDKBXWMLN-UHFFFAOYSA-N	ClC1=CC=C(C=C1)C2(CCC2)C(N(C)C)CC(C)C	0.27837	5.92e-08	1.36878
1158	Positive	15.293	601.486	Unknown	[M+H]+	null	null	null	null	0.083064	5.95e-08	1.67325
1159	Positive	12.588	337.191	low score: catharanthine	[M+H]+	C21H24N2O2	Ibogan-type alkaloids	CMKFQVZJOWHHDV-YIILKADPSA-N	O=C(OC)C12C=3NC=4C=CC=CC4C3CCN5CC(C=C(CC)C51)C2	12.562	5.95e-08	1.42115
1160	Positive	1.031	990.821	Unknown	[M+H]+	null	null	null	null	10.447	6.04e-08	1.41516
1161	Positive	8.998	524.336	low score: Methionine conjugated chenodeoxycholic acid	[M+H]+	C29H49NO5S	Glycinated bile acids and derivatives	CDNGTOVFEUSMMG-AVINCHNBSA-N	C[C@H](CCC(N[C@@H](CCSC)C(O)=O)=O)[C@H]1CC[C@@]2([H])[C@]3([H])[C@H](O)C[C@]4([H])C[C@H](O)CC[C@]4(C)[C@H]3CC[C@@]21C	14.06	6.06e-08	1.519
1162	Positive	15.805	708.608	Unknown	[M+H]+	null	null	null	null	0.092371	6.07e-08	1.58561
1163	Positive	10.956	124.096	low score: HISTIDINOL	[M-H2O+H]+	C6H11N3O	Aralkylamines	ZQISRDCJNBUVMM-YFKPBYRVSA-N	N[C@H](CO)CC1=CN=CN1	4.1122	6.11e-08	1.55495
1164	Positive	0.637	121.984	Unknown	[M+H]+	null	null	null	null	28.2	6.14e-08	1.62826
1165	Positive	1.053	822.844	Unknown	[M+H]+	null	null	null	null	4.3691	6.14e-08	1.25492
1166	Positive	13.892	402.389	Unknown	[M+H]+	null	null	null	null	0.057495	6.15e-08	1.36983
1167	Positive	12.298	443.314	low score: Unknown (carbon number 20); PlaSMA ID-2430	[M+H]+	C20H38N6O5	Unknown	null	null	0.078615	6.3e-08	1.64929
1168	Positive	0.426	380.85	Unknown	[M+H]+	null	null	null	null	24.315	6.33e-08	1.61213
1169	Positive	8.309	454.362	Unknown	[M+H]+	null	null	null	null	0.065261	6.33e-08	1.44542
1170	Positive	11.971	245.192	no MS2: 6-methyl-2-(4-methyl-3-cyclohexen-1-yl)-5-hepten-2-ol	[M+Na]+	C15H26O	Sesquiterpenoids	RGZSQWQPBWRIAQ-HUUCEWRRSA-N	OC(C)(CCC=C(C)C)C1CC=C(C)CC1	0.15383	6.4e-08	1.48831
1171	Positive	1.098	656.764	Unknown	[M+H]+	null	null	null	null	4.4551	6.62e-08	1.54954
1172	Positive	8.127	528.343	low score: "2-((4R)-4-((3R,5S,7S,9S,10S,13R,14S,17R)-3,7-dihydroxy-10,13-dimethylhexadecahydro-1H-cyclopenta[a]phenanthren-17-yl)-2,2-dimethylpentanamido)ethane-1-sulfonic acid"	[M+H]+	C28H49NO6S	Taurinated bile acids and derivatives	UXAHTIGXQXJADE-VHDFTFQCSA-N	[H][C@@]12[C@@H](O)C[C@]3([H])C[C@H](O)CC[C@]3(C)[C@H]1CC[C@@]4(C)[C@H]2CC[C@@H]4[C@@H](CCC(NCC(C)(C)S(=O)(O)=O)=O)C	0.088464	6.68e-08	1.41747
1173	Positive	0.547	283.846	Unknown	[M+H]+	null	null	null	null	88.841	6.72e-08	1.70595
1174	Positive	9.274	496.457	Unknown	[M+H]+	null	null	null	null	0.065765	6.74e-08	1.24264
1175	Positive	0.477	151.133	Unknown	[M+H]+	null	null	null	null	2.3542	6.92e-08	1.36506
1176	Positive	1.026	878.803	no MS2: Triacylglycerol 16:0-18:0-18:1	[M+NH4]+	C55H104O6	Triacylglycerols	FBSFVQLIMBQJDP-RUUVMHMZSA-N	C(COC(=O)CCC=CCCCCCCCCCCCCC)(COC(CCCCCCCCCCCCCCC)=O)OC(CCCCCCCCCCCCCCCCC)=O	18.142	6.96e-08	1.65848
1177	Positive	8.955	562.399	Unknown	[M+H]+	null	null	null	null	0.12977	6.98e-08	1.51051
1178	Positive	0.427	247.885	Unknown	[M+H]+	null	null	null	null	67.15	7.02e-08	1.58617
1179	Positive	1.047	978.796	Unknown	[M+H]+	null	null	null	null	7.3638	7.02e-08	1.19482
1180	Positive	0.427	291.867	Unknown	[M+H]+	null	null	null	null	24.664	7.04e-08	1.36198
1181	Positive	8.347	494.359	Unknown	[M+H]+	null	null	null	null	0.086791	7.09e-08	1.33178
1182	Positive	8.75	412.246	1-Decanoyl-2-hydroxy-sn-glycero-3-phosphocholine	[M]+	C18H39NO7P	1-acyl-sn-glycero-3-phosphocholines	SECPDKKEUKDCPG-QGZVFWFLSA-O	CCCCCCCCCC(=O)OCC(O)COP(O)(=O)OCC[N+1](C)(C)C	0.12843	7.12e-08	1.60853
1183	Positive	12.753	904.663	Unknown	[M+H]+	null	null	null	null	0.011912	7.12e-08	1.45372
1184	Positive	1.053	616.906	Unknown	[M+H]+	null	null	null	null	4.6144	7.16e-08	1.43748
1185	Positive	0.734	309.873	Unknown	[M+H]+	null	null	null	null	36.789	7.34e-08	1.61474
1186	Positive	1.083	135.014	Unknown	[M+H]+	null	null	null	null	2.6731	7.37e-08	1.34877
1187	Positive	1.046	664.79	Unknown	[M+H]+	null	null	null	null	17.34	7.4e-08	1.72031
1188	Positive	0.425	378.847	Unknown	[M+H]+	null	null	null	null	29.972	7.43e-08	1.49734
1189	Positive	0.23	125.089	Unknown	[M+H]+	null	null	null	null	2.269	7.51e-08	1.29312
1190	Positive	14.508	433.381	low score: (6E,10E,14E,18E)-2,6,10,15,19,23-hexamethyl-2,6,10,14,18,22-tetracosahexaene	[M+Na]+	C30H50	Triterpenoids	YYGNTYWPHWGJRM-AAJYLUCBSA-N	C(=C(C)C)CCC(=CCCC(=CCCC=C(C)CCC=C(C)CCC=C(C)C)C)C	0.052805	7.52e-08	1.25895
1191	Positive	1.263	365.112	no MS2: Melibiose	[M+Na]+	C12H22O11	Fatty acyl glycosides of mono- and disaccharides	AYRXSINWFIIFAE-GFRRCQKTSA-N	O=CC(O)C(O)C(O)C(O)COC1OC(CO)C(O)C(O)C1O	16.349	7.53e-08	1.43826
1192	Negative	0.379	153.862	Unknown	[M-H]-	null	null	null	null	0.2413	7.56e-08	1.39392
1193	Positive	10.496	646.327	Aconitine	[M+H]+	C34H47NO11	Aconitane-type diterpenoid alkaloids	XFSBVAOIAHNAPC-HLBYDYOGSA-N	O=C(OC1C2C3CC1(O)C(OC)C(O)C2(OC(=O)C)C4C(OC)C5C6(COC)CN(CC)C4C35C(OC)CC6O)C=7C=CC=CC7	70.528	7.64e-08	1.6551
1194	Positive	0.61	244.909	Unknown	[M+H]+	null	null	null	null	10.997	7.69e-08	1.4673
1195	Positive	1.237	130.06	5-OXO-L-PROLINE	[M+H]+	C5H7NO3	Alpha amino acids and derivatives	ODHCTXKNWHHXJC-VKHMYHEASA-N	C1CC(=O)N[C@@H]1C(=O)O	3.8345	7.72e-08	1.50634
1196	Positive	14.283	431.424	Unknown	[M+H]+	null	null	null	null	0.025364	7.75e-08	1.37717
1197	Positive	15.384	579.471	Unknown	[M+H]+	null	null	null	null	0.096436	8.14e-08	1.74506
1198	Positive	6.31	311.192	low score: testosterone	[M+Na]+	C19H28O2	Androgens and derivatives	MUMGGOZAMZWBJJ-DYKIIFRCSA-N	O=C1C=C2CCC3C(CCC4(C)C(O)CCC34)C2(C)CC1	2.209	8.17e-08	1.38234
1199	Positive	1.059	748.758	Unknown	[M+H]+	null	null	null	null	9.7363	8.18e-08	1.30372
1200	Positive	0.427	232.907	Unknown	[M+H]+	null	null	null	null	121.22	8.19e-08	1.58101
1201	Positive	13.438	379.313	conessine	[M+Na]+	C24H40N2	Conanine-type alkaloids	GPLGAQQQNWMVMM-CYFNKAHPSA-N	C1=C2CC(N(C)C)CCC2(C)C3CCC45CN(C)C(C)C5CCC4C3C1	0.11214	8.26e-08	1.57532
1202	Positive	8.12	867.446	low score: Ferintoic acid A	[M+H]+	C46H58N8O9	Oligopeptides	ZATXZWLJJMKQDB-AOWMEVDFSA-N	CC(C)[C@@H]1NC(=O)[C@@H](CCCCNC(=O)[C@H](CC2=CC=CC=C2)NC(=O)[C@H](C)N(C)C(=O)[C@H](CCC2=CC=C(O)C=C2)NC1=O)NC(=O)NC(CC1=CNC2=C1C=CC=C2)C(O)=O	0.002741	8.34e-08	1.66583
1203	Positive	1.039	730.788	Unknown	[M+H]+	null	null	null	null	16.003	8.35e-08	1.58081
1204	Positive	8.121	397.237	low score: 4-(3,14-dihydroxy-10,13-dimethylhexadecahydro-1H-cyclopenta[a]phenanthren-17-yl)furan-2(5H)-one	[M+H-H2O]+	C23H34O4	Cardenolides and derivatives	XZTUSOXSLKTKJQ-UHFFFAOYSA-N	O=C1OCC(=C1)C2CCC3(O)C4CCC5CC(O)CCC5(C)C4CCC23C	0.033722	8.49e-08	1.62556
1205	Positive	10.482	552.369	low score: (3S,10R,13R)-10,13-dimethyl-17-octyl-2,3,4,7,8,9,10,11,12,13,14,15,16,17-tetradecahydro-1H-cyclopenta[a]phenanthren-3-yl (4-nitrophenyl) carbonate	[M+H]+	C34H49NO5	Androstane steroids	AFNDTSIACJAGSO-ZNBDOVCMSA-N	O=C(OC1=CC=C(C=C1)[N+](=O)[O-])OC2CC3=CCC4C(CCC5(C)C(CCCCCCCC)CCC45)C3(C)CC2	22.612	8.49e-08	1.35511
1206	Positive	7.802	281.159	low score: (5R)-trans-1,7-diphenyl-5-hydroxy-6-hepten-3-one	[M+H]+	C19H20O2	Linear diarylheptanoids	NEQGOKAKPXXESR-YLZCUGDYSA-N	O=C(CCC=1C=CC=CC1)CC(O)C=CC=2C=CC=CC2	13.723	8.57e-08	1.51088
1207	Positive	14.485	478.446	Unknown	[M+H]+	null	null	null	null	0.0060481	8.58e-08	1.56393
1208	Positive	13.486	832.645	Unknown	[M+H]+	null	null	null	null	0.19324	8.89e-08	1.26017
1209	Positive	0.652	422.853	Unknown	[M+H]+	null	null	null	null	4.4313	8.94e-08	1.52831
1210	Positive	1.048	950.738	Unknown	[M+H]+	null	null	null	null	7.3582	9e-08	1.44907
1211	Positive	1.018	752.842	Unknown	[M+H]+	null	null	null	null	28.17	9.02e-08	1.67807
1212	Positive	11.277	353.3	Unknown	[M+H]+	null	null	null	null	0.09623	9.02e-08	1.49258
1213	Positive	1.049	692.798	Unknown	[M+H]+	null	null	null	null	3.0524	9.02e-08	1.29613
1214	Positive	1.081	892.819	Unknown	[M+H]+	null	null	null	null	3.5798	9.17e-08	1.42598
1215	Positive	8.12	851.474	Unknown	[M+H]+	null	null	null	null	0.0046874	9.2e-08	1.61738
1216	Positive	10.493	613.301	low score: (2R,3R,4S,6R)-6-((10-formyl-5,14-dihydroxy-13-methyl-17-(5-oxo-2,5-dihydrofuran-3-yl)hexadecahydro-1H-cyclopenta[a]phenanthren-3-yl)oxy)-4-methoxy-2-methyltetrahydro-2H-pyran-3-yl acetate	[M+Na]+	C32H46O10	Cardenolide glycosides and derivatives	FPIVCKLVSVCJHW-UHFFFAOYSA-N	O=CC12CCC(OC3OC(C)C(OC(=O)C)C(OC)C3)CC2(O)CCC4C1CCC5(C)C(C6=CC(=O)OC6)CCC45O	24.245	9.41e-08	1.55751
1217	Positive	1.027	740.816	Unknown	[M+H]+	null	null	null	null	27.467	9.42e-08	1.69633
1218	Positive	8.362	498.392	Unknown	[M+H]+	null	null	null	null	0.12258	9.58e-08	1.21799
1219	Positive	1.056	666.791	Unknown	[M+H]+	null	null	null	null	5.1066	9.72e-08	1.60264
1220	Positive	0.261	832.658	Unknown	[M+H]+	null	null	null	null	0.076121	9.74e-08	1.65383
1221	Positive	0.721	231.873	Unknown	[M+H]+	null	null	null	null	35.06	9.77e-08	1.60027
1222	Positive	15.231	623.497	Unknown	[M+H]+	null	null	null	null	0.078469	9.83e-08	1.61048
1223	Positive	14.485	455.364	Unknown	[M+H]+	null	null	null	null	0.0090912	9.84e-08	1.60394
1224	Positive	0.852	324.24	Unknown	[M+H]+	null	null	null	null	0.18347	9.84e-08	1.40043
1225	Positive	10.485	290.672	Unknown	[M+H]+	null	null	null	null	65.33	1e-07	1.60871
1226	Positive	1.161	120.082	PHENYLETHANOLAMINE	[M-H2O+H]+	C8H11NO	Aralkylamines	ULSIYEODSMZIPX-UHFFFAOYSA-N	NCC(O)C1=CC=CC=C1	2.5565	1.02e-07	1.40696
1227	Positive	0.439	271.851	Unknown	[M+H]+	null	null	null	null	92.283	1.02e-07	1.70183
1228	Positive	10.494	618.313	low score: NCGC00385653-01_C36H40O8_	[M+NH4]+	C36H40O8	Jatrophane and cyclojatrophane diterpenoids	IBMKFRJIFFORNR-LAZXBOAMSA-N	CC1CC2(OC(C)=O)C(\C=C(C)/C(CC(=O)C(C)(C)/C=C/C(C)C2=O)OC(=O)C3=CC=CC=C3)C1OC(=O)C4=CC=CC=C4	171.47	1.02e-07	1.6302
1229	Positive	8.615	584.408	Unknown	[M+H]+	null	null	null	null	0.041969	1.02e-07	1.59455
1230	Positive	0.425	252.876	Unknown	[M+H]+	null	null	null	null	182.78	1.02e-07	1.57712
1231	Positive	1.244	220.133	no MS2: 2-dimethylaminoethyl cinnamate	[M+H]+	C13H17NO2	Cinnamic acid esters	BWJAQVSVFPHGSU-CMDGGOBGSA-N	CN(C)CCOC(=O)/C=C/c1ccccc1	0.35342	1.02e-07	1.27127
1232	Positive	1.226	263.155	no MS2: 3-Hexen-1-ol O-b-D-glucopyranoside	[M+H-H2O]+	C12H22O6	Fatty acyl glycosides of mono- and disaccharides	OZIPFYKAIOOVEJ-ODWUMMNUSA-N	OCC1OC(OCCC=CCC)C(O)C(O)C1O	0.44412	1.02e-07	1.4466
1233	Positive	1.664	324.239	Unknown	[M+H]+	null	null	null	null	0.18965	1.02e-07	1.37723
1234	Positive	14.539	810.668	Unknown	[M+H]+	null	null	null	null	0.061537	1.02e-07	1.39495
1235	Positive	8.022	296.212	Unknown	[M+H]+	null	null	null	null	0.13381	1.06e-07	1.45323
1236	Positive	9.622	100.083	N-Methyl-2-pyrrolidone	[M+H]+	C5H9NO	N-alkylpyrrolidines	SECXISVLQFMRJM-UHFFFAOYSA-N	CN1CCCC1=O	20.569	1.07e-07	1.69617
1237	Positive	17.51	648.599	low score: Solanesol_major	[M+NH4]+	C45H74O	Polyprenols	AFPLNGZPBSKHHQ-MEGGAXOGSA-N	CC(C)=CCCC(C)=CCCC(C)=CCCC(C)=CCCC(C)=CCCC(C)=CCCC(C)=CCCC(C)=CCCC(C)=CCO	0.092873	1.07e-07	1.6605
1238	Positive	1.041	988.824	Unknown	[M+H]+	null	null	null	null	8.3671	1.08e-07	1.39213
1239	Positive	0.732	295.875	Unknown	[M+H]+	null	null	null	null	13.502	1.1e-07	1.51693
1240	Positive	1.006	280.139	low score: 2-Methyl-4'-(methylthio)-2-morpholinopropiophenone	[M+H]+	C15H21NO2S	Alkyl-phenylketones	LWRBVKNFOYUCNP-UHFFFAOYSA-N	CSC1=CC=C(C=C1)C(=O)C(C)(C)N1CCOCC1	0.18012	1.1e-07	1.33412
1241	Positive	1.021	640.865	Unknown	[M+H]+	null	null	null	null	9.1097	1.11e-07	1.32432
1242	Positive	18.825	557.495	Unknown	[M+H]+	null	null	null	null	0.10548	1.12e-07	1.69556
1243	Positive	0.679	129.944	Unknown	[M+H]+	null	null	null	null	59.299	1.14e-07	1.53045
1244	Positive	0.638	120.976	Unknown	[M+H]+	null	null	null	null	15.253	1.16e-07	1.29031
1245	Positive	9.109	301.168	low score: 1-[4,5-bis(hydroxymethyl)-3-methoxy-2-methylphenoxy]-3-methylbutane-2,3-diol	[M+H]+	C15H24O6	Benzyl alcohols	MAQMWSUGBCIGLJ-UHFFFAOYSA-N	OCC1=CC(OCC(O)C(O)(C)C)=C(C(OC)=C1CO)C	0.29429	1.16e-07	1.36457
1246	Positive	1.08	874.716	Unknown	[M+H]+	null	null	null	null	11.404	1.18e-07	1.32431
1247	Positive	0.452	138.99	no MS2: Fumaric acid	[M+Na]+	C4H4O4	Dicarboxylic acids and derivatives	VZCYOOQTPOCHFL-OWOJBTEDSA-N	O=C(O)C=CC(=O)O	4.8084	1.19e-07	1.52281
1248	Positive	1.023	708.86	Unknown	[M+H]+	null	null	null	null	9.2091	1.19e-07	1.5108
1249	Positive	1.04	980.787	Unknown	[M+H]+	null	null	null	null	5.5032	1.19e-07	1.32024
1250	Positive	0.762	130.975	Unknown	[M+H]+	null	null	null	null	51.254	1.21e-07	1.62211
1251	Positive	16.122	780.621	Unknown	[M+H]+	null	null	null	null	0.068393	1.21e-07	1.5989
1252	Positive	0.597	209.935	Unknown	[M+H]+	null	null	null	null	25.794	1.22e-07	1.59782
1253	Positive	8.538	468.272	low score: "2-((3R)-3-((3R,5S,7S,9S,10S,13R,14S,17R)-3,7-dihydroxy-10,13-dimethylhexadecahydro-1H-cyclopenta[a]phenanthren-17-yl)butanamido)ethane-1-sulfonic acid"	[M-H2O+H]+	C25H43NO6S	Dihydroxy bile acids, alcohols and derivatives	UTTMPNQHQIRCGZ-ZQMFMVRBSA-N	[H][C@@]12[C@@H](O)C[C@]3([H])C[C@H](O)CC[C@]3(C)[C@H]1CC[C@@]4(C)[C@H]2CC[C@@H]4[C@@H](CC(NCCS(=O)(O)=O)=O)C	3.1334	1.22e-07	1.24129
1254	Positive	0.099	560.51	no MS2: Ceramide (d18:1/16:0)	[M+Na]+	C34H67NO3	Ceramides	YDNKGFDKKRUKPY-TURZORIXSA-N	CCCCCCCCCCCCCCCC(=O)N[C@@H](CO)[C@@H](/C=C/CCCCCCCCCCCCC)O	0.092912	1.24e-07	1.62035
1255	Positive	1.285	233.996	Unknown	[M+H]+	null	null	null	null	27.022	1.24e-07	1.55044
1256	Positive	8.24	301.169	low score: 1-[4,5-bis(hydroxymethyl)-3-methoxy-2-methylphenoxy]-3-methylbutane-2,3-diol	[M+H]+	C15H24O6	Benzyl alcohols	MAQMWSUGBCIGLJ-UHFFFAOYSA-N	OCC1=CC(OCC(O)C(O)(C)C)=C(C(OC)=C1CO)C	0.27634	1.24e-07	1.33727
1257	Positive	7.735	228.164	low score: C8-homoserine lactone	[M+H]+	C12H21NO3	N-acyl-alpha amino acids and derivatives	JKEJEOJPJVRHMQ-UHFFFAOYSA-N	CCCCCCCC(=O)NC1CCOC1=O	2.4434	1.25e-07	1.24909
1258	Positive	1.051	902.844	Unknown	[M+H]+	null	null	null	null	4.5844	1.25e-07	1.36077
1259	Positive	1.041	902.814	no MS2: Glyceryl trioleate	[M+NH4]+	C57H104O6	Triacylglycerols	PHYFQTYBJUILEZ-IUPFWZBJSA-N	CCCCCCCC/C=C\CCCCCCCC(=O)OCC(OC(=O)CCCCCCC/C=C\CCCCCCCC)COC(=O)CCCCCCC/C=C\CCCCCCCC	8.5781	1.27e-07	1.19366
1260	Positive	8.791	610.367	low score: NCGC00386067-01!2-[2-(19-acetamido-16,18-dihydroxy-5,9-dimethyl-6-oxoicosan-7-yl)oxy-2-oxoethyl]butanedioic acid [IIN-based on: CCMSLIB00000846988]	[M+Na]+	C30H53NO10	Tricarboxylic acids and derivatives	CYKDMNNWBMLNSF-UHFFFAOYSA-N	CCCCC(C)C(=O)C(CC(C)CCCCCCC(O)CC(O)C(C)NC(C)=O)OC(=O)CC(CC(O)=O)C(O)=O	0.083126	1.29e-07	1.44942
1261	Positive	1.019	964.853	Unknown	[M+H]+	null	null	null	null	16.526	1.3e-07	1.50712
1262	Positive	9.4	588.279	Unknown	[M+H]+	null	null	null	null	192.05	1.31e-07	1.58614
1263	Positive	11.793	560.42	Unknown	[M+H]+	null	null	null	null	0.090542	1.31e-07	1.49524
1264	Positive	6.408	280.186	no MS2: Sibutramine	[M+H]+	C17H26ClN	Chlorobenzenes	UNAANXDKBXWMLN-UHFFFAOYSA-N	ClC1=CC=C(C=C1)C2(CCC2)C(N(C)C)CC(C)C	0.27142	1.31e-07	1.35736
1265	Positive	9.004	442.389	Unknown	[M+H]+	null	null	null	null	0.065394	1.32e-07	1.32364
1266	Positive	1.08	960.733	Unknown	[M+H]+	null	null	null	null	10.366	1.33e-07	1.28386
1267	Positive	10.617	100.083	N-Methyl-2-pyrrolidone	[M+H]+	C5H9NO	N-alkylpyrrolidines	SECXISVLQFMRJM-UHFFFAOYSA-N	CN1CCCC1=O	21.198	1.34e-07	1.65671
1268	Positive	8.267	478.326	low score: N-(4-((6aR,8aS)-4-hydroxy-6a,8a,9-trimethyl-3,4,5,6,6a,6b,7,8,8a,8b,11a,12,12a,12b-tetradecahydro-1H-naphtho[2',1':4,5]indeno[2,1-b]furan-10-yl)-2-methylbutyl)acetamide	[M+Na]+	C29H45NO3	Furostanes and derivatives	CNHACNVJEKRLHF-UDCIVARJSA-N	O=C(NCC(C)CCC=1OC2CC3C4CC=C5CC(O)CCC5(C)C4CCC3(C)C2C1C)C	27.661	1.36e-07	1.53358
1269	Positive	0.505	306.819	Unknown	[M+H]+	null	null	null	null	273.59	1.36e-07	1.75296
1270	Positive	11.335	303.283	low score: h_58_bolasterone-m	[M+H-H2O]+	C21H36O2	Androgens and derivatives	ZWQUPIDNCOVROC-HEEAJRSSSA-N	C[C@]1(O)CC[C@@H]2[C@]1(C)CC[C@H]3[C@H]2[C@H](C)C[C@@]4([H])[C@]3(C)CC[C@@H](O)C4	0.069833	1.37e-07	1.22975
1271	Positive	13.349	257.273	Unknown	[M+H]+	null	null	null	null	0.16788	1.38e-07	1.21229
1272	Positive	1.028	814.937	Unknown	[M+H]+	null	null	null	null	6.892	1.39e-07	1.35434
1273	Positive	13.597	325.234	low score: GLYCEROL-MYRISTATE	[M+Na]+	C17H34O4	1-monoacylglycerols	DCBSHORRWZKAKO-UHFFFAOYSA-N	CCCCCCCCCCCCCC(=O)OCC(CO)O	0.14366	1.4e-07	1.62922
1274	Positive	1.08	175.122	Arginine	[M+H]+	C6H14N4O2	L-alpha-amino acids	ODKSFYDXXFIFQN-UHFFFAOYSA-N	C(CC(C(=O)O)N)CN=C(N)N	2.4875	1.4e-07	1.62168
1275	Positive	7.798	397.232	low score: 4-(3,14-dihydroxy-10,13-dimethylhexadecahydro-1H-cyclopenta[a]phenanthren-17-yl)furan-2(5H)-one	[M+H-H2O]+	C23H34O4	Cardenolides and derivatives	XZTUSOXSLKTKJQ-UHFFFAOYSA-N	O=C1OCC(=C1)C2CCC3(O)C4CCC5CC(O)CCC5(C)C4CCC23C	13.587	1.41e-07	1.33054
1276	Positive	1.024	698.831	Unknown	[M+H]+	null	null	null	null	11.102	1.44e-07	1.48003
1277	Positive	1.031	932.857	Unknown	[M+H]+	null	null	null	null	8.9702	1.46e-07	1.2742
1278	Positive	0.402	147.962	Unknown	[M+H]+	null	null	null	null	8.1355	1.47e-07	1.38882
1279	Positive	0.428	300.899	Unknown	[M+H]+	null	null	null	null	3.5653	1.47e-07	1.43917
1280	Positive	14.335	136.032	no MS2: 2-Benzoxazolinone; CE0; ASSKVPFEZFQQNQ-UHFFFAOYSA-N	[M+H]+	C7H5NO2	Benzoxazolones	ASSKVPFEZFQQNQ-UHFFFAOYSA-N	c1ccc2c(c1)nc(O)o2	3.8156	1.48e-07	1.58613
1281	Positive	1.188	862.626	no MS2: C16 Lactosyl Ceramide (d18:1/16:0)	[M+H]+	C46H87NO13	Glycosyl-N-acylsphingosines	HLIJNIKSBCIDGO-QKLMXXKVSA-N	[H][C@](/C=C/CCCCCCCCCCCCC)(O)[C@@]([H])(NC(CCCCCCCCCCCCCCC)=O)CO[C@H](O1)[C@H](O)[C@@H](O)[C@@H]([C@H]1CO)O[C@H](O2)[C@H](O)[C@@H](O)[C@H]([C@H]2CO)O	11.484	1.48e-07	1.23561
1282	Positive	7.817	638.375	Unknown	[M+H]+	null	null	null	null	0.099417	1.49e-07	1.55574
1283	Positive	1.083	976.656	Unknown	[M+H]+	null	null	null	null	5.1446	1.49e-07	1.28656
1284	Positive	12.143	439.336	low score: "(3R,5S,7R,8R,9S,10S,12S,13R,14S,17R)-17-((2R,5R)-5,7-dihydroxyheptan-2-yl)-10,13-dimethylhexadecahydro-1H-cyclopenta[a]phenanthrene-3,7,12-triol"	[M+H]+	C26H46O5	Tetrahydroxy bile acids, alcohols and derivatives	PBXYLMVLLSYZLN-OSSPIOCLSA-N	O[C@@H](C1)CC[C@@]2(C)[C@]1([H])C[C@@H](O)[C@]3([H])[C@]2([H])C[C@H](O)[C@@]4(C)[C@@]3([H])CC[C@@]4([C@H](C)CC[C@@H](O)CCO)[H]	0.078875	1.52e-07	1.64945
1285	Positive	7.083	432.269	low score: NCGC00381130-01!methyl (2E,8E)-9-[3a-hydroxy-6,7-dimethyl-1-(2-methylpropyl)-3-oxo-2,4,7,7a-tetrahydro-1H-isoindol-4-yl]-4,5-dihydroxy-8-methylnona-2,8-dienoate [IIN-based on: CCMSLIB00000846918]	[M-H2O+H]+	C25H39NO6	Bicyclic monoterpenoids	YUXUTEAAGHFKKH-MKQCFFQWSA-N	COC(=O)\\C=C\\C(O)C(O)CC\\C(C)=C\\C1C=C(C)C(C)C2C(CC(C)C)NC(=O)C12O	9.4883	1.52e-07	1.42701
1286	Positive	14.403	175.12	no MS2: Gramine	[M+H]+	C11H14N2	3-alkylindoles	OCDGBSUVYYVKQZ-UHFFFAOYSA-N	C=1C=CC2=C(C1)NC=C2CN(C)C	2.3381	1.53e-07	1.42311
1287	Positive	0.428	265.909	Unknown	[M+H]+	null	null	null	null	38.959	1.53e-07	1.47071
1288	Positive	9.461	280.187	low score: Tramadol N-Oxide	[M+H]+	C16H25NO3	Anisoles	HBXKSXMNNGHBEA-UHFFFAOYSA-N	COC1=CC=CC(=C1)C1(O)CCCCC1C[N+](C)(C)[O-]	0.31457	1.54e-07	1.30944
1289	Positive	0.442	273.848	Unknown	[M+H]+	null	null	null	null	56.49	1.54e-07	1.59838
1290	Positive	8.862	124.094	low score: HISTIDINOL	[M-H2O+H]+	C6H11N3O	Aralkylamines	ZQISRDCJNBUVMM-YFKPBYRVSA-N	N[C@H](CO)CC1=CN=CN1	3.6068	1.54e-07	1.4748
1291	Positive	1.06	811.792	Unknown	[M+H]+	null	null	null	null	7.8357	1.54e-07	1.37793
1292	Positive	0.427	222.881	Unknown	[M+H]+	null	null	null	null	187.24	1.55e-07	1.61492
1293	Positive	9.112	592.277	no MS2: NCGC00347608-02_C30H38O11_7,11-Methano-2H,4H-oxireno[1,8]cycloocta[1,2-f][2]benzopyran-8-acetic acid, 4-(3-furanyl)dodecahydro-alpha,11-dihydroxy-4a,7,9,9-tetramethyl-2,13-dioxo-10-(1-oxopropoxy)-, methyl ester, (alphaR,4R,4aR,7S,8S,10S,11S,11aR,12aS)-	[M+NH4]+	C30H38O11	Limonoids	FZBGZDZLYSLJFE-MVAMGWTESA-N	CCC(=O)O[C@H]1C(C)(C)[C@H]([C@@H](O)C(=O)OC)[C@@]2(C)C3CC[C@]4(C)C(CC(=O)O[C@H]4C5=COC=C5)[C@]36O[C@@H]6[C@]1(O)C2=O	21.994	1.55e-07	1.58022
1294	Positive	1.282	159.008	Unknown	[M+H]+	null	null	null	null	12.8	1.57e-07	1.44206
1295	Positive	0.933	258.128	low score: cyclo(Trp-Ala)	[M+H]+	C14H15N3O2	Alpha amino acids and derivatives	VDMMFAOUINDEGC-UHFFFAOYSA-N	O=C(NC1CC2=CNC3=C2C=CC=C3)C(C)NC1=O	0.009375	1.57e-07	1.52106
1296	Positive	12.515	400.372	Unknown	[M+H]+	null	null	null	null	0.15444	1.58e-07	1.5133
1297	Positive	1.021	392.132	no MS2: PharmaGSID_47330	[M+H]+	C21H15F2N5O	Biphenylcarbonitriles	PCZLQMGFNUNVOM-UHFFFAOYSA-N	CC(C)(O)C1=NC2=NC=C(N2N=C1)C1=CC(=C(F)C=C1)C1=C(C=CC=C1F)C#N	0.034179	1.59e-07	1.53038
1298	Positive	1.03	726.881	Unknown	[M+H]+	null	null	null	null	12.53	1.6e-07	1.44877
1299	Positive	12.447	427.336	low score: 5Alpha-Cholestanol	[M+K]+	C27H48O	Cholesterols and derivatives	QYIXCDOBOSTCEI-QCYZZNICSA-N	OC1CCC2(C)C(CCC3C4CCC(C(C)CCCC(C)C)C4(C)CCC32)C1	0.15755	1.62e-07	1.59353
1300	Positive	0.426	254.874	Unknown	[M+H]+	null	null	null	null	38.872	1.63e-07	1.46996
1301	Positive	0.65	209.935	Unknown	[M+H]+	null	null	null	null	26.856	1.63e-07	1.57626
1302	Positive	14.253	453.362	no MS2: "(3R,5R,7R,8S,9S,10S,12S,13R,14S,17R)-17-((R)-7-hydroxy-6-(hydroxymethyl)heptan-2-yl)-10,13-dimethylhexadecahydro-1H-cyclopenta[a]phenanthrene-3,7,12-triol"	[M+H]+	C27H48O5	Tetrahydroxy bile acids, alcohols and derivatives	JNMALBXXJSWZQY-JOICSPLZSA-N	C[C@@H]([C@H]1CC[C@]2([H])[C@]1(C)[C@@H](O)C[C@@]3([H])[C@]2([H])[C@H](O)C[C@]4([H])[C@]3(C)CC[C@@H](O)C4)CCCC(CO)CO	0.08999	1.63e-07	1.50323
1303	Positive	0.441	262.879	Unknown	[M+H]+	null	null	null	null	30.746	1.63e-07	1.34766
1304	Positive	1.053	900.846	Unknown	[M+H]+	null	null	null	null	6.0974	1.64e-07	1.29945
1305	Positive	11.805	351.277	low score: NCGC00385006-01_C25H36O2_Dicyclopenta[a,d]cycloocten-3(3aH)-one, 7-[(2Z)-1,5-dimethyl-2,4-hexadien-1-yl]-6,6a,7,8,9,9a,10,10a-octahydro-4-(hydroxymethyl)-1,9a-dimethyl-, (4E,6aS,7R,9aR,10aS)-	[M-H2O+H]+	C25H36O2	Ophiobolane sesterterpenoids	GUXDHNIKRQCWIE-WMZUYDDLSA-N	C[C@@H](\C=C/C=C(C)C)[C@H]1CC[C@]2(C)C[C@H]\3C(C(=O)\C=C3C)\C(=C/C[C@@H]12)CO	0.13439	1.65e-07	1.4493
1306	Positive	1.262	419.11	no MS2: NCGC00384628-01![7-methyl-6,8-dioxo-3-[(E)-prop-1-enyl]isochromen-7-yl] 4-hydroxy-2-methoxy-6-methylbenzoate [IIN-based: Match]	[M+Na]+	C22H20O7	Azaphilones	VRWFEVIVOZKBJA-AATRIKPKSA-N	COC1=C(C(=O)OC2(C)C(=O)C=C3C=C(OC=C3C2=O)\\C=C\\C)C(C)=CC(O)=C1	35.869	1.66e-07	1.46309
1307	Positive	9.286	100.083	N-Methyl-2-pyrrolidone	[M+H]+	C5H9NO	N-alkylpyrrolidines	SECXISVLQFMRJM-UHFFFAOYSA-N	CN1CCCC1=O	23.195	1.68e-07	1.66625
1308	Positive	12.62	157.096	no MS2: Unknown (carbon number 8); PlaSMA ID-276	[M+H]+	C8H12O3	Unknown	null	null	4.8041	1.68e-07	1.31588
1309	Positive	1.02	684.849	Unknown	[M+H]+	null	null	null	null	25.237	1.68e-07	1.60946
1310	Positive	7.328	460.303	Unknown	[M+H]+	null	null	null	null	4.3718	1.68e-07	1.38536
1311	Positive	1.154	306.978	Unknown	[M+H]+	null	null	null	null	3.0296	1.68e-07	1.2101
1312	Positive	1.103	203.066	7-hydroxy-2,3-dihydrocyclopenta[c]chromen-4(1H)-one	[M+H]+	C12H10O3	Coumarins and derivatives	HLHZQJPJPNQANY-UHFFFAOYSA-N	O=C1OC=2C=C(O)C=CC2C3=C1CCC3	3.1853	1.69e-07	1.47115
1313	Positive	0.65	369.083	low score: ethyl 3-(2,3-dihydrobenzo[b][1,4]dioxin-6-yl)-7-hydroxy-4-oxo-4H-chromene-2-carboxylate	[M+H]+	C20H16O7	Isoflavones	NTNSKOKPJWYQGX-UHFFFAOYSA-N	O=C(OCC)C=1OC2=CC(O)=CC=C2C(=O)C1C=3C=CC=4OCCOC4C3	51.11	1.7e-07	1.61558
1314	Negative	19.774	195.8	Unknown	[M-H]-	null	null	null	null	0.36339	1.7e-07	1.42419
1315	Positive	0.997	157.093	low score: Unknown (carbon number 8); PlaSMA ID-275	[M+H]+	C8H12O3	Unknown	null	null	2.9472	1.73e-07	1.45806
1316	Positive	6.557	419.254	low score: Ophiopogonoside A	[M+H]+	C21H38O8	Terpene glycosides	DQRUOTCFENUXKV-UHFFFAOYSA-N	OCC1OC(OC2C(CCC3(C)C(O)CCC(O)(C)C23)C(C)C)C(O)C(O)C1O	8.1943	1.74e-07	1.38288
1317	Positive	11.062	100.083	N-Methyl-2-pyrrolidone	[M+H]+	C5H9NO	N-alkylpyrrolidines	SECXISVLQFMRJM-UHFFFAOYSA-N	CN1CCCC1=O	24.021	1.75e-07	1.66577
1318	Positive	9.382	100.083	N-Methyl-2-pyrrolidone	[M+H]+	C5H9NO	N-alkylpyrrolidines	SECXISVLQFMRJM-UHFFFAOYSA-N	CN1CCCC1=O	18.071	1.76e-07	1.62176
1319	Positive	13.461	369.263	low score: Dihydromuronic acid	[M+K]+	C21H36O5	Gamma butyrolactones	SPGPUDJMXMJNCU-JLAWEPINSA-N	CC(=O)CCCCCCCCCCCCC[C@@H]1C(C(C)C(=O)O1)C(=O)O	0.098133	1.77e-07	1.46665
1320	Positive	0.427	119.966	Unknown	[M+H]+	null	null	null	null	10.3	1.78e-07	1.17422
1321	Positive	0.662	278.82	Unknown	[M+H]+	null	null	null	null	61.131	1.79e-07	1.61014
1322	Positive	0.43	360.793	Unknown	[M+H]+	null	null	null	null	46.746	1.79e-07	1.4562
1323	Positive	12.928	782.638	Unknown	[M+H]+	null	null	null	null	0.11391	1.79e-07	1.31193
1324	Positive	14.85	136.034	no MS2: 2-Benzoxazolinone; CE0; ASSKVPFEZFQQNQ-UHFFFAOYSA-N	[M+H]+	C7H5NO2	Benzoxazolones	ASSKVPFEZFQQNQ-UHFFFAOYSA-N	c1ccc2c(c1)nc(O)o2	4.6208	1.88e-07	1.54371
1325	Positive	14.145	670.528	Unknown	[M+H]+	null	null	null	null	0.040805	1.88e-07	1.63958
1326	Positive	12.511	369.267	low score: Dihydromuronic acid	[M+K]+	C21H36O5	Gamma butyrolactones	SPGPUDJMXMJNCU-JLAWEPINSA-N	CC(=O)CCCCCCCCCCCCC[C@@H]1C(C(C)C(=O)O1)C(=O)O	5.7284	1.88e-07	1.4505
1327	Positive	1.039	632.831	Unknown	[M+H]+	null	null	null	null	8.5952	1.89e-07	1.36352
1328	Positive	15.087	667.526	Unknown	[M+H]+	null	null	null	null	0.092539	1.9e-07	1.61724
1329	Positive	0.424	372.819	Unknown	[M+H]+	null	null	null	null	68.876	1.91e-07	1.4818
1330	Positive	0.363	122.104	2,6-Xylidine	[M+H]+	C8H11N	m-Xylenes	UFFBMTHBGFGIHF-UHFFFAOYSA-N	Cc1cccc(c1N)C	16.742	1.92e-07	1.315
1331	Positive	0.148	726.602	Unknown	[M+H]+	null	null	null	null	0.056328	1.94e-07	1.63503
1332	Positive	7.304	473.301	low score: NCGC00347850-02_C26H42O6_2-(4a-Methyl-8-methylenedecahydro-2-naphthalenyl)-2-propanyl 6-deoxy-2-O-[(2E)-2-methyl-2-butenoyl]hexopyranoside	[M+Na]+	C26H42O6	Eudesmane, isoeudesmane or cycloeudesmane sesquiterpenoids	QKRNXYDUTFTSBG-NVNXTCNLSA-N	C\C=C(\C)C(=O)OC1C(O)C(O)C(C)OC1OC(C)(C)C2CCC3(C)CCCC(=C)C3C2	12.504	1.95e-07	1.39416
1333	Positive	1.03	796.874	Unknown	[M+H]+	null	null	null	null	9.8521	1.96e-07	1.29338
1334	Positive	1.039	338.075	Unknown	[M+H]+	null	null	null	null	0.1386	1.98e-07	1.39949
1335	Positive	1.089	850.755	Unknown	[M+H]+	null	null	null	null	5.6788	1.98e-07	1.33672
1336	Positive	1.029	674.822	Unknown	[M+H]+	null	null	null	null	20.784	1.99e-07	1.65884
1337	Positive	8.444	642.306	low score: NCGC00347365-02!5-hydroxy-2,2-dimethyl-10-(2-methylbut-3-en-2-yl)pyrano[3,2-g]chromen-8-one [IIN-based on: CCMSLIB00000846817]	[M+H-H2O]+	C19H20O4	Linear pyranocoumarins	WYMMNGQSPNWCIK-UHFFFAOYSA-N	CC(C)(C=C)C1=C2OC(C)(C)C=CC2=C(O)C3=C1OC(=O)C=C3	17.87	2e-07	1.62202
1338	Positive	1.05	774.888	Unknown	[M+H]+	null	null	null	null	4.5016	2.01e-07	1.22442
1339	Positive	9.026	585.27	low score: (1R,3aR,3bS,4aR,6S,7S,7aR,8R,8aR,9aR)-1,4a,8-tris(acetyloxy)-2,2,3b,6,8a-pentamethyl-4,9-dioxo-tetradecahydro-1H-cyclopenta[a]s-indacen-7-yl butanoate	[M+Na]+	C30H42O10	Diterpenoids	JQCBBCVOQHOGTI-HROOPKDASA-N	O=C(OC1C2C(=O)C3(C)C(OC(=O)C)C4C(OC(=O)CCC)C(C)CC4(OC(=O)C)C(=O)C3(C)C2CC1(C)C)C	29.151	2.02e-07	1.65896
1340	Positive	1.278	257.008	no MS2: Piperic Acid	[M+K]+	C12H10O4	Benzodioxoles	RHBGITBPARBDPH-WZNPJAPVSA-N	O=C(O)C=CC=CC1=CC=C2OCOC2=C1	113.45	2.02e-07	1.6238
1341	Positive	10.674	239.183	Unknown	[M+H]+	null	null	null	null	0.30442	2.02e-07	1.33161
1342	Positive	9.493	301.168	low score: adrenosterone	[M+H]+	C19H24O3	Androgens and derivatives	RZRPTBIGEANTGU-IRIMSJTPSA-N	O=C1C=C2CCC3C(C(=O)CC4(C(=O)CCC34)C)C2(C)CC1	0.30685	2.02e-07	1.36067
1343	Positive	1.1	908.673	Unknown	[M+H]+	null	null	null	null	6.2467	2.02e-07	1.26683
1344	Positive	1.018	818.835	Unknown	[M+H]+	null	null	null	null	37.926	2.03e-07	1.55126
1345	Positive	1.113	700.786	Unknown	[M+H]+	null	null	null	null	5.3492	2.04e-07	1.1636
1346	Positive	12.073	601.377	low score: Timosaponin A1	[M+Na]+	C33H54O8	Steroidal saponins	ZNEIIZNXGCIAAL-UHFFFAOYSA-N	OCC1OC(OC2CCC3(C)C(CCC4C3CCC5(C)C4CC6OC7(OCC(C)CC7)C(C)C65)C2)C(O)C(O)C1O	21.85	2.05e-07	1.31594
1347	Positive	1.278	272.983	Unknown	[M+H]+	null	null	null	null	28.925	2.06e-07	1.5311
1348	Positive	1.04	878.864	Unknown	[M+H]+	null	null	null	null	4.5033	2.06e-07	1.34581
1349	Positive	1.044	318.244	no MS2: Drofenine	[M+H]+	C20H31NO2	Benzene and substituted derivatives	AGJBLWCLQCKRJP-UHFFFAOYSA-N	[H]c(c([H])2)c([H])c([H])c(c([H])2)C([H])(C(=O)OC([H])([H])C([H])([H])N(C([H])([H])C([H])([H])[H])C([H])([H])C([H])([H])[H])C([H])(C([H])([H])1)C([H])([H])C([H])([H])C([H])([H])C([H])([H])1	0.056982	2.07e-07	1.28333
1350	Positive	14.911	758.634	Unknown	[M+H]+	null	null	null	null	0.099878	2.09e-07	1.22984
1351	Positive	1.968	324.242	Unknown	[M+H]+	null	null	null	null	0.16996	2.1e-07	1.35376
1352	Positive	10.602	536.409	low score: NCGC00347555-02!2-(21-amino-3,20-dihydroxydocosan-2-yl)oxy-6-(hydroxymethyl)oxane-3,4,5-triol	[M+H]+	C28H57NO8	Fatty acyl glycosides of mono- and disaccharides	FZSYYVOKNJZJTF-UHFFFAOYSA-N	CC(N)C(O)CCCCCCCCCCCCCCCCC(O)C(C)OC1OC(CO)C(O)C(O)C1O	0.21424	2.1e-07	1.34708
1353	Positive	1.023	898.855	Unknown	[M+H]+	null	null	null	null	16.281	2.1e-07	1.46378
1354	Positive	10.488	223.082	no MS2: 2-methylanthra-9,10-quinone	[M+H]+	C15H10O2	Anthraquinones	NJWGQARXZDRHCD-UHFFFAOYSA-N	O=C1C=2C=CC=CC2C(=O)C3=CC(=CC=C13)C	5.1816	2.12e-07	1.57027
1355	Positive	1.015	650.894	Unknown	[M+H]+	null	null	null	null	5.3246	2.14e-07	1.39061
1356	Positive	0.443	269.85	Unknown	[M+H]+	null	null	null	null	36.917	2.15e-07	1.57608
1357	Positive	13.478	804.621	Unknown	[M+H]+	null	null	null	null	0.095162	2.15e-07	1.7062
1358	Positive	0.648	196.903	Unknown	[M+H]+	null	null	null	null	23.166	2.17e-07	1.51146
1359	Positive	14.35	638.548	Unknown	[M+H]+	null	null	null	null	0.019556	2.19e-07	1.27427
1360	Positive	7.493	301.162	no MS2: 1-[4,5-bis(hydroxymethyl)-3-methoxy-2-methylphenoxy]-3-methylbutane-2,3-diol	[M+H]+	C15H24O6	Benzyl alcohols	MAQMWSUGBCIGLJ-UHFFFAOYSA-N	OCC1=CC(OCC(O)C(O)(C)C)=C(C(OC)=C1CO)C	0.36849	2.2e-07	1.35005
1361	Positive	13.482	627.477	low score: NCGC00347386-02!1-methyl-2-undecylquinolin-4-one [IIN-based on: CCMSLIB00000847478]	[2M+H]+	C21H31NO	Hydroquinolones	ZLIHBZFNMQLPOT-UHFFFAOYSA-N	CCCCCCCCCCCC1=CC(=O)C2=CC=CC=C2N1C	0.059696	2.23e-07	1.51931
1362	Positive	14.303	461.271	low score: MMV676602	[M+H]+	C25H32N8O	Phenylpiperazines	RXZMYLDMFYNEIM-UHFFFAOYSA-N	OC(=NC)C1=NN(C=2C=3N=C(N=CC3CC(C12)(C)C)NC4=CC=C(C=C4)N5CCN(C)CC5)C	36.05	2.24e-07	1.51249
1363	Positive	1.597	102.1	low score: CYCLOPENTANONE	[M+NH4]+	C5H8O	Cyclic ketones	BGTOWKSIORTVQH-UHFFFAOYSA-N	C1CCC(=O)C1	3.8501	2.25e-07	1.49367
1364	Positive	9.929	752.585	Unknown	[M+H]+	null	null	null	null	0.0677	2.31e-07	1.36062
1365	Positive	8.91	280.184	low score: (2R,3R,4S,5S,6R)-2-[(Z)-hex-3-enoxy]-6-(hydroxymethyl)oxane-3,4,5-triol_major	[M+NH4]+	C12H22O6	Fatty acyl glycosides of mono- and disaccharides	OZIPFYKAIOOVEJ-ODWUMMNUSA-N	CCC=CCCOC1OC(CO)C(O)C(O)C1O	0.32246	2.31e-07	1.30968
1366	Positive	7.794	597.347	Unknown	[M+H]+	null	null	null	null	0.11133	2.33e-07	1.61117
1367	Positive	0.563	278.821	Unknown	[M+H]+	null	null	null	null	42.143	2.4e-07	1.54344
1368	Positive	12.221	401.301	Unknown	[M+H]+	null	null	null	null	0.064201	2.41e-07	1.38576
1369	Positive	1.042	970.821	Unknown	[M+H]+	null	null	null	null	9.4862	2.41e-07	1.42144
1370	Positive	0.085	100.083	no MS2: 2-Piperidone; CE0; XUWHAWMETYGRKB-UHFFFAOYSA-N	[M+H]+	C5H9NO	Piperidinones	XUWHAWMETYGRKB-UHFFFAOYSA-N	C1CCN=C(C1)O	13.526	2.42e-07	1.6212
1371	Positive	14.422	367.313	low score: Batyl Alcohol	[M+Na]+	C21H44O3	Monoalkylglycerols	OGBUMNBNEWYMNJ-UHFFFAOYSA-N	OCC(O)COCCCCCCCCCCCCCCCCCC	0.163	2.42e-07	1.40436
1372	Positive	1.089	768.783	Unknown	[M+H]+	null	null	null	null	4.9789	2.53e-07	1.41014
1373	Positive	1.264	265.041	low score: PURPUROGALLIN-4-CARBOXYLIC ACID	[M+H]+	C12H8O7	Tropolones	PJSKCCANFAFYHW-UHFFFAOYSA-N	O=C(O)C1=CC(=O)C(O)=C2C(O)=C(O)C(O)=CC2=C1	29.886	2.55e-07	1.60576
1374	Positive	0.428	430.732	Unknown	[M+H]+	null	null	null	null	19.01	2.55e-07	1.46232
1375	Positive	1.019	694.88	Unknown	[M+H]+	null	null	null	null	18.58	2.56e-07	1.47668
1376	Positive	15.513	786.667	Unknown	[M+H]+	null	null	null	null	0.041143	2.57e-07	1.48988
1377	Positive	9.882	482.392	Unknown	[M+H]+	null	null	null	null	0.27691	2.59e-07	1.34844
1378	Positive	1.128	772.682	Unknown	[M+H]+	null	null	null	null	6.5264	2.59e-07	1.35218
1379	Positive	10.247	100.083	no MS2: 2-Piperidone; CE0; XUWHAWMETYGRKB-UHFFFAOYSA-N	[M+H]+	C5H9NO	Piperidinones	XUWHAWMETYGRKB-UHFFFAOYSA-N	C1CCN=C(C1)O	21.518	2.6e-07	1.70096
1380	Positive	8.721	100.083	N-Methyl-2-pyrrolidone	[M+H]+	C5H9NO	N-alkylpyrrolidines	SECXISVLQFMRJM-UHFFFAOYSA-N	CN1CCCC1=O	18.951	2.6e-07	1.64547
1381	Positive	0.427	382.844	Unknown	[M+H]+	null	null	null	null	24.842	2.6e-07	1.4171
1382	Positive	6.302	333.175	low score: Isoxaben	[M+H]+	C18H24N2O4	Dimethoxybenzenes	PMHURSZHKKJGBM-UHFFFAOYSA-N	CCC(C)(CC)C1=NOC(=C1)NC(=O)C2=C(C=CC=C2OC)OC	6.4615	2.61e-07	1.45964
1383	Positive	11.97	507.317	low score: (2E,6E,11E,13E)-18-(2,6-dioxopiperidin-4-yl)-9-hydroxy-8-methoxy-10,12,14-trimethyl-15-oxooctadeca-2,6,11,13-tetraenoic acid	[M+NH4]+	C27H39NO7	Lineolic acids and derivatives	SLGMSTJSVRGVPB-BESLVFPPSA-N	O=C(O)C=CCCC=CC(OC)C(O)C(C=C(C=C(C(=O)CCCC1CC(=O)N=C(O)C1)C)C)C	0.046574	2.61e-07	1.45793
1384	Positive	1.035	920.828	Unknown	[M+H]+	null	null	null	null	15.154	2.64e-07	1.28409
1385	Negative	0.083	155.859	Unknown	[M-H]-	null	null	null	null	0.21891	2.66e-07	1.49275
1386	Positive	6.681	419.345	no MS2: "(3R,5S,7R,9S,10S,12S,13R,14S,17R)-17-((2R)-7-hydroxy-6-methylheptan-2-yl)-10,13-dimethylhexadecahydro-1H-cyclopenta[a]phenanthrene-3,7,12-triol"	[M-H2O+H]+	C27H48O4	Tetrahydroxy bile acids, alcohols and derivatives	XJZGNVBLVFOSKJ-XZULNKEGSA-N	C[C@H](CCCC(C)CO)[C@H]1CC[C@H]2[C@]3([H])[C@H](O)C[C@@H]4C[C@H](O)CC[C@]4(C)[C@H]3C[C@H](O)[C@@]21C	0.28032	2.7e-07	1.1308
1387	Positive	1.117	714.72	Unknown	[M+H]+	null	null	null	null	5.6755	2.7e-07	1.15836
1388	Positive	9.654	295.247	Unknown	[M+H]+	null	null	null	null	0.44401	2.71e-07	1.13788
1389	Positive	1.092	892.734	Unknown	[M+H]+	null	null	null	null	9.1092	2.72e-07	1.27991
1390	Positive	0.427	277.879	Unknown	[M+H]+	null	null	null	null	21.064	2.74e-07	1.37888
1391	Positive	1.077	154.071	no MS2: Hypoxanthine	[M+NH4]+	C5H4N4O	Hypoxanthines	FDGQSTZJBFJUBT-UHFFFAOYSA-N	OC1=NC=NC=2NC=NC12	0.3206	2.75e-07	1.36861
1392	Positive	1.046	648.858	Unknown	[M+H]+	null	null	null	null	8.3988	2.76e-07	1.45573
1393	Positive	0.569	223.079	no MS2: 2-methylanthra-9,10-quinone	[M+H]+	C15H10O2	Anthraquinones	NJWGQARXZDRHCD-UHFFFAOYSA-N	O=C1C=2C=CC=CC2C(=O)C3=CC(=CC=C13)C	4.8637	2.77e-07	1.63362
1394	Positive	14.306	380.14	no MS2: NCGC00384901-01_C24H17N3O2_(7Z)-7-Benzylidene-6-methyl-6,7-dihydroquinazolino[3,2-a][1,4]benzodiazepine-5,13-dione	[M+H]+	C24H17N3O2	Pyrimidodiazepines	HXDZMNFJQNZXKW-QNGOZBTKSA-N	CN1C(=O)C2=C(C=CC=C2)N3C(=O)C4=C(C=CC=C4)/N=C3/C1=C/C5=CC=CC=C5	20.718	2.77e-07	1.54277
1395	Positive	13.544	589.38	low score: "(3R,6R)-6-((3R,5R,7R,8R,9S,10S,12S,13R,14S,17R)-3,7-diacetoxy-12-hydroxy-10,13-dimethylhexadecahydro-1H-cyclopenta[a]phenanthren-17-yl)heptane-1,3-diyl diacetate"	[M-H2O+H]+	C34H54O9	Monohydroxy bile acids, alcohols and derivatives	MRBBYYYXCVLILT-VUXPKORVSA-N	C[C@@H]([C@H]1CC[C@]2([H])[C@]1(C)[C@@H](O)C[C@@]3([H])[C@@]2([H])[C@H](OC(C)=O)C[C@]4([H])[C@]3(C)CC[C@@H](OC(C)=O)C4)CC[C@@H](OC(C)=O)CCOC(C)=O	0.085422	2.78e-07	1.61364
1396	Positive	7.009	387.207	low score: Sufentanil	[M+H]+	C22H30N2O2S	Anilides	GGCSSNBKKAUURC-UHFFFAOYSA-N	[H]C([H])([H])OC([H])([H])C(N(C(=O)C([H])([H])C([H])([H])[H])c(c([H])3)c([H])c([H])c([H])c([H])3)(C([H])([H])1)C([H])([H])C([H])([H])N(C([H])([H])C([H])([H])c(s2)c([H])c([H])c([H])2)C([H])([H])1	5.7748	2.81e-07	1.26875
1397	Positive	1.013	828.868	Unknown	[M+H]+	null	null	null	null	27.117	2.81e-07	1.49329
1398	Positive	14.064	698.561	Unknown	[M+H]+	null	null	null	null	0.027512	2.82e-07	1.63373
1399	Positive	18.673	829.634	Unknown	[M+H]+	null	null	null	null	0.091969	2.82e-07	1.5225
1400	Positive	15.555	606.5	Unknown	[M+H]+	null	null	null	null	0.1018	2.83e-07	1.55027
1401	Positive	0.765	285.845	Unknown	[M+H]+	null	null	null	null	73.895	2.84e-07	1.67025
1402	Positive	0.426	226.876	Unknown	[M+H]+	null	null	null	null	35.443	2.87e-07	1.53864
1403	Positive	9.026	590.271	no MS2: (NAG)(anNAM)-AqOG[3-NH2-SATA]	[M+2H]2+	C47H78N12O23	Polypeptides	CGGXYVJDGPQESG-UHFFFAOYSA-N	CC(=O)NC1C(OC2C3COC(O3)C(NC(C)=O)C2OC(C)C(=O)NC(C)C(=O)NC(CCC(=O)NC(CCCNC(=O)C(CO)NC(=O)C(C)NC(=O)C(NC(=O)C(C)N)C(C)O)C(=O)NCC(=O)O)C(N)=O)OC(CO)C(O)C1O	215.6	2.89e-07	1.713
1404	Positive	0.747	156.982	Unknown	[M+H]+	null	null	null	null	3.4028	2.89e-07	1.36708
1405	Positive	1.04	716.851	Unknown	[M+H]+	null	null	null	null	10.337	2.9e-07	1.3839
1406	Positive	9.291	496.41	Unknown	[M+H]+	null	null	null	null	0.13182	2.91e-07	1.31831
1407	Positive	10.178	488.402	low score: Tricaprylin (C8:0)	[M+NH4]+	C27H50O6	Triacylglycerols	VLPFTAMPNXLGLX-UHFFFAOYSA-N	CCCCCCCC(=O)OCC(COC(=O)CCCCCCC)OC(=O)CCCCCCC	0.10758	2.93e-07	1.42384
1408	Positive	13.551	548.349	Unknown	[M+H]+	null	null	null	null	0.055835	2.98e-07	1.56732
1409	Positive	0.428	236.85	Unknown	[M+H]+	null	null	null	null	13.044	2.99e-07	1.41436
1410	Positive	9.17	100.084	N-Methyl-2-pyrrolidone	[M+H]+	C5H9NO	N-alkylpyrrolidines	SECXISVLQFMRJM-UHFFFAOYSA-N	CN1CCCC1=O	19.315	3e-07	1.64824
1411	Positive	17.77	338.372	Unknown	[M+H]+	null	null	null	null	0.083188	3e-07	1.34156
1412	Positive	14.06	670.527	Unknown	[M+H]+	null	null	null	null	0.043819	3.05e-07	1.5841
1413	Positive	0.427	500.789	Unknown	[M+H]+	null	null	null	null	18.243	3.06e-07	1.46652
1414	Positive	6.408	416.28	low score: Salmeterol	[M+H]+	C25H37NO4	Benzyl alcohols	GIIZNNXWQWCKIB-UHFFFAOYSA-N	[H]OC([H])([H])c(c(O[H])2)c([H])c(c([H])c([H])2)C([H])(O[H])C([H])([H])N([H])C([H])([H])C([H])([H])C([H])([H])C([H])([H])C([H])([H])C([H])([H])OC([H])([H])C([H])([H])C([H])([H])C([H])([H])c(c([H])1)c([H])c([H])c([H])c([H])1	2.6474	3.09e-07	1.32536
1415	Positive	10.494	604.36	low score: desmethylenylnocardamine	[M+NH4]+	C26H46N6O9	Macrolactams	SXTGVXKFOVZYIK-UHFFFAOYSA-N	O=C1N(O)CCCCN=C(O)CCC(=O)N(O)CCCCCN=C(O)CCC(=O)N(O)CCCCCN=C(O)CC1	12.956	3.1e-07	1.50396
1416	Positive	19.536	823.562	Unknown	[M+H]+	null	null	null	null	0.036275	3.1e-07	1.32479
1417	Positive	1.064	836.787	no MS2: Triacylglycerol 15:0-16:0-18:1	[M+NH4]+	C52H98O6	Triacylglycerols	UOKYBFHTUSDWJW-HYLXNHFUSA-N	C(CCCCC(=O)OCC(OC(CCCCCCCCCCCCCCC)=O)COC(CCC=CCCCCCCCCCCCCC)=O)CCCCCCCCC	5.3326	3.14e-07	1.40749
1418	Positive	12.183	487.397	low score: hyperin	[M+Na]+	C21H20O12	Flavonoid-3-O-glycosides	OVSQVDMCBVZWGM-DTGCRPNFSA-N	O=C1C(OC2OC(CO)C(O)C(O)C2O)=C(OC=3C=C(O)C=C(O)C13)C=4C=CC(O)=C(O)C4	7.7386	3.2e-07	1.3357
1419	Positive	0.425	250.881	Unknown	[M+H]+	null	null	null	null	289.27	3.24e-07	1.57927
1420	Positive	0.455	294.884	Unknown	[M+H]+	null	null	null	null	11.587	3.35e-07	1.4368
1421	Positive	1.046	924.823	no MS2: Triacylglycerol 16:0-18:1-22:5	[M+NH4]+	C59H102O6	Triacylglycerols	CKLUFKYOOVYBNN-WFFHTSENSA-N	C(CCCCCCCCCCCCC)=CCCC(=O)OC(COC(=O)CCC=CCC=CCC=CCC=CCC=CCCCCC)COC(=O)CCCCCCCCCCCCCCC	5.0715	3.46e-07	1.5064
1422	Positive	13.468	679.481	Unknown	[M+H]+	null	null	null	null	0.078517	3.5e-07	1.56435
1423	Positive	1.048	106.96	Unknown	[M+H]+	null	null	null	null	3.0657	3.52e-07	1.49869
1424	Positive	9.584	621.345	low score: NCGC00381318-01![3-methyl-1-[3-methyl-1-[3-methyl-1-oxo-1-(2,3,4,5,6-pentahydroxyhexoxy)pentan-2-yl]oxy-1-oxopentan-2-yl]oxy-1-oxopentan-2-yl] 2-hydroxy-3-methylpentanoate [IIN-based on: CCMSLIB00000845116]	[M-H2O+H]+	C30H54O14	Depsipeptides	XHFZCGJKWBSHAG-UHFFFAOYSA-N	CCC(C)C(O)C(=O)OC(C(C)CC)C(=O)OC(C(C)CC)C(=O)OC(C(C)CC)C(=O)OCC(O)C(O)C(O)C(O)CO	55.096	3.57e-07	1.51427
1425	Positive	1.066	982.801	Unknown	[M+H]+	null	null	null	null	3.8798	3.57e-07	1.21451
1426	Positive	1.087	656.804	Unknown	[M+H]+	null	null	null	null	3.2261	3.62e-07	1.32061
1427	Negative	19.751	199.798	Unknown	[M-H]-	null	null	null	null	0.40301	3.62e-07	1.49336
1428	Positive	7.446	100.084	no MS2: 2-Piperidone; CE0; XUWHAWMETYGRKB-UHFFFAOYSA-N	[M+H]+	C5H9NO	Piperidinones	XUWHAWMETYGRKB-UHFFFAOYSA-N	C1CCN=C(C1)O	17.414	3.64e-07	1.63486
1429	Positive	1.168	133.041	Unknown	[M+H]+	null	null	null	null	2.429	3.65e-07	1.34191
1430	Positive	1.192	846.65	Unknown	[M+H]+	null	null	null	null	11.252	3.67e-07	1.46205
1431	Positive	7.143	100.083	no MS2: 2-Piperidone; CE0; XUWHAWMETYGRKB-UHFFFAOYSA-N	[M+H]+	C5H9NO	Piperidinones	XUWHAWMETYGRKB-UHFFFAOYSA-N	C1CCN=C(C1)O	17.437	3.68e-07	1.62408
1432	Positive	0.428	295.902	Unknown	[M+H]+	null	null	null	null	13.25	3.68e-07	1.4468
1433	Positive	10.755	618.308	no MS2: NCGC00385653-01_C36H40O8_	[M+NH4]+	C36H40O8	Jatrophane and cyclojatrophane diterpenoids	IBMKFRJIFFORNR-LAZXBOAMSA-N	CC1CC2(OC(C)=O)C(\C=C(C)/C(CC(=O)C(C)(C)/C=C/C(C)C2=O)OC(=O)C3=CC=CC=C3)C1OC(=O)C4=CC=CC=C4	24.084	3.7e-07	1.31996
1434	Positive	1.026	862.866	Unknown	[M+H]+	null	null	null	null	15.829	3.7e-07	1.30151
1435	Positive	1.051	662.793	no MS2: (NAG)(NAM)-AqKA[3-NH2-d];(3br-4)-None-KA[3-NH2-d]	[M+2H]2+	C53H89N13O26	Polypeptides	QGUYNCYMDSELNF-UHFFFAOYSA-N	CC(=O)NC1C(OC2C(CO)OC(O)C(NC(C)=O)C2OC(C)C(=O)NC(C)C(=O)NC(CCC(=O)NC(CCCCNC(=O)CC(NC(=O)C(C)NC(=O)C(N)CCCCNC(=O)CC(N)C(=O)O)C(=O)O)C(=O)NC(C)C(=O)O)C(N)=O)OC(CO)C(O)C1O	13	3.76e-07	1.73873
1436	Positive	14.337	223.079	no MS2: 2-methylanthra-9,10-quinone	[M+H+Na]2+	C15H10O2	Anthraquinones	NJWGQARXZDRHCD-UHFFFAOYSA-N	O=C1C=2C=CC=CC2C(=O)C3=CC(=CC=C13)C	9.9601	3.79e-07	1.35569
1437	Positive	0.933	235.183	no MS2: Lidocaine	[M+H]+	C14H22N2O	m-Xylenes	NNJVILVZKWQKPM-UHFFFAOYSA-N	OC(=NC=1C(=CC=CC1C)C)CN(CC)CC	0.3684	3.82e-07	1.13454
1438	Positive	1.048	706.897	Unknown	[M+H]+	null	null	null	null	2.7498	3.85e-07	1.11715
1439	Positive	1.047	972.794	Unknown	[M+H]+	null	null	null	null	6.4203	3.87e-07	1.24503
1440	Positive	0.207	212.134	low score: Mescaline	[M+H]+	C11H17NO3	Phenethylamines	RHCSKNNOAZULRK-UHFFFAOYSA-N	COC1=CC(=CC(=C1OC)OC)CCN	11.738	3.89e-07	1.50439
1441	Positive	1.246	493.049	Unknown	[M+H]+	null	null	null	null	48.567	4.02e-07	1.45534
1442	Positive	10.854	797.11	Unknown	[M+H]+	null	null	null	null	0.067267	4.02e-07	1.46272
1443	Positive	0.476	243.846	Unknown	[M+H]+	null	null	null	null	50.299	4.03e-07	1.67226
1444	Positive	1.072	820.86	Unknown	[M+H]+	null	null	null	null	11.536	4.03e-07	1.24448
1445	Positive	1.091	954.729	Unknown	[M+H]+	null	null	null	null	7.7912	4.03e-07	1.3194
1446	Positive	7.799	295.139	low score: 11-(phenylcarbonyl)-7,11-diazatricyclo[7.3.1.0<2,7>]trideca-2,4-dien-6-one	[M+H]+	C18H18N2O2	N-benzoylpiperidines	HODDQHCNQOBZKP-UHFFFAOYSA-N	C1C2CN(CC1C3=CC=CC(=O)N3C2)C(=O)C4=CC=CC=C4	12.425	4.05e-07	1.25661
1447	Positive	1.073	876.716	Unknown	[M+H]+	null	null	null	null	6.0584	4.06e-07	1.28306
1448	Positive	1.036	728.88	Unknown	[M+H]+	null	null	null	null	9.8674	4.18e-07	1.25475
1449	Positive	1.064	929.81	Unknown	[M+H]+	null	null	null	null	3.2569	4.2e-07	1.17619
1450	Positive	1.942	114.093	low score: Unknown (carbon number 6); PlaSMA ID-45	[M+H]+	C6H11NO	Unknown	null	null	8.2927	4.22e-07	1.68032
1451	Positive	6.301	460.306	Unknown	[M+H]+	null	null	null	null	3.2137	4.22e-07	1.4276
1452	Positive	1.082	542.789	Unknown	[M+H]+	null	null	null	null	3.9265	4.22e-07	1.15622
1453	Positive	6.382	131.94	Unknown	[M+H]+	null	null	null	null	103.57	4.25e-07	1.66504
1454	Positive	0.448	310.839	Unknown	[M+H]+	null	null	null	null	32.674	4.39e-07	1.6047
1455	Positive	11.303	403.317	low score: "(3R,7R,8R,9S,10S,12S,13R,14S,17R)-17-((2R,5R)-5,7-dihydroxyheptan-2-yl)-10,13-dimethylhexadecahydro-1H-cyclopenta[a]phenanthrene-3,7,12-triol"	[M-2H2O+H]+	C26H46O5	Tetrahydroxy bile acids, alcohols and derivatives	PBXYLMVLLSYZLN-LQHTUWPVSA-N	O[C@@H](C1)CC[C@@]2(C)C1([H])C[C@@H](O)[C@]3([H])[C@]2([H])C[C@H](O)[C@@]4(C)[C@@]3([H])CC[C@@]4([C@H](C)CC[C@@H](O)CCO)[H]	3.9777	4.4e-07	1.2595
1456	Positive	1.028	806.898	Unknown	[M+H]+	null	null	null	null	7.9367	4.4e-07	1.27107
1457	Positive	0.428	185	low score: Chelidonic acid (not validated)	[M+H]+	C7H4O6	Pyranones and derivatives	PBAYDYUZOSNJGU-UHFFFAOYSA-N	O=C(O)C=1OC(=CC(=O)C=1)C(=O)O	21.772	4.41e-07	1.50033
1458	Positive	8.124	281.163	low score: (5R)-trans-1,7-diphenyl-5-hydroxy-6-hepten-3-one	[M+H]+	C19H20O2	Linear diarylheptanoids	NEQGOKAKPXXESR-YLZCUGDYSA-N	O=C(CCC=1C=CC=CC1)CC(O)C=CC=2C=CC=CC2	0.050445	4.45e-07	1.53521
1459	Positive	8.869	542.361	low score: NCGC00381175-01!3-hydroxy-2-[[3-[3-(3-hydroxy-6-methylheptanoyl)oxy-6-methylheptanoyl]oxy-8-methylnonanoyl]amino]propanoic acid [IIN-based on: CCMSLIB00000848442]	[M-H2O+H]+	C29H53NO9	N-acyl-alpha amino acids	MWZPHNZNPKKSEI-UHFFFAOYSA-N	CC(C)CCCCC(CC(=O)NC(CO)C(O)=O)OC(=O)CC(CCC(C)C)OC(=O)CC(O)CCC(C)C	0.060447	4.48e-07	1.48355
1460	Positive	0.727	302.822	Unknown	[M+H]+	null	null	null	null	269.82	4.5e-07	1.61505
1461	Positive	1.249	495.049	Unknown	[M+H]+	null	null	null	null	20.308	4.5e-07	1.28165
1462	Positive	1.202	274.292	Unknown	[M+H]+	null	null	null	null	103.78	4.6e-07	1.47093
1463	Positive	11.848	387.34	Unknown	[M+H]+	null	null	null	null	0.32325	4.62e-07	1.25919
1464	Positive	12.918	804.624	Unknown	[M+H]+	null	null	null	null	0.14318	4.64e-07	1.60321
1465	Positive	1.094	778.72	Unknown	[M+H]+	null	null	null	null	6.7409	4.7e-07	1.15277
1466	Negative	0.088	153.862	Unknown	[M-H]-	null	null	null	null	0.25644	4.71e-07	1.41108
1467	Positive	1.061	548.909	Unknown	[M+H]+	null	null	null	null	4.1789	4.73e-07	1.26036
1468	Positive	5.847	194.133	low score: COTININE	[M+NH4]+	C10H12N2O	Pyrrolidinylpyridines	UIKROCXWUNQSPJ-VIFPVBQESA-N	O=C1N(C)C(C=2C=NC=CC2)CC1	0.40972	4.79e-07	1.27281
1469	Positive	13.095	836.661	Unknown	[M+H]+	null	null	null	null	5.9131	4.79e-07	1.51026
1470	Positive	8.53	548.84	Unknown	[M+H]+	null	null	null	null	14.836	4.81e-07	1.60905
1471	Positive	1.002	267.076	no MS2: BIOTIN	[M+Na]+	C10H16N2O3S	Biotin and derivatives	YBJHBAHKTGYVGT-ZKWXMUAHSA-N	[H][C@]12CS[C@@H](CCCCC(O)=O)[C@@]1([H])NC(=O)N2	0.27174	4.81e-07	1.24646
1472	Positive	0.426	324.815	Unknown	[M+H]+	null	null	null	null	13.185	4.82e-07	1.50541
1473	Positive	1.277	389.301	no MS2: methyl 4-((10R,13R)-3-hydroxy-10,13-dimethyl-2,3,4,7,8,9,10,11,12,13,14,15,16,17-tetradecahydro-1H-cyclopenta[a]phenanthren-17-yl)pentanoate	[M+H-H2O]+	C25H40O3	Monohydroxy bile acids, alcohols and derivatives	IMNIZYXAQQBADI-JMYVHVBSSA-N	O=C(OC)CCC(C)C1CCC2C3CC=C4CC(O)CCC4(C)C3CCC12C	0.055368	4.85e-07	1.361
1474	Positive	11.296	704.498	Unknown	[M+H]+	null	null	null	null	8.816	4.91e-07	1.30245
1475	Positive	7.244	100.084	no MS2: 2-Piperidone; CE0; XUWHAWMETYGRKB-UHFFFAOYSA-N	[M+H]+	C5H9NO	Piperidinones	XUWHAWMETYGRKB-UHFFFAOYSA-N	C1CCN=C(C1)O	17.239	4.99e-07	1.64675
1476	Positive	12.931	373.238	low score: 5-(5-methoxycarbonyl-5,8a-dimethyl-2-methylidene-3,4,4a,6,7,8-hexahydro-1H-naphthalen-1-yl)-3-methylpentanoic acid	[M+2Na-H]+	C21H34O4	Diterpenoids	WTDIRAZPDUAJEB-UHFFFAOYSA-N	O=C(O)CC(C)CCC1C(=C)CCC2C(C(=O)OC)(C)CCCC12C	0.080059	4.99e-07	1.64574
1477	Positive	7.182	301.167	low score: 1-[4,5-bis(hydroxymethyl)-3-methoxy-2-methylphenoxy]-3-methylbutane-2,3-diol	[M+2Na-H]+	C15H24O6	Benzyl alcohols	MAQMWSUGBCIGLJ-UHFFFAOYSA-N	OCC1=CC(OCC(O)C(O)(C)C)=C(C(OC)=C1CO)C	0.32455	5.09e-07	1.28951
1478	Positive	1.076	832.785	Unknown	[M+H]+	null	null	null	null	5.0056	5.09e-07	1.3548
1479	Positive	1.038	856.832	Unknown	[M+H]+	null	null	null	null	3.8024	5.09e-07	1.31332
1480	Positive	11.111	124.096	low score: HISTIDINOL	[M-H2O+H]+	C6H11N3O	Aralkylamines	ZQISRDCJNBUVMM-YFKPBYRVSA-N	N[C@H](CO)CC1=CN=CN1	3.9137	5.12e-07	1.51948
1481	Positive	8.871	100.083	N-Methyl-2-pyrrolidone	[M+H]+	C5H9NO	N-alkylpyrrolidines	SECXISVLQFMRJM-UHFFFAOYSA-N	CN1CCCC1=O	18.328	5.16e-07	1.64655
1482	Positive	1.029	672.821	Unknown	[M+H]+	null	null	null	null	24.144	5.27e-07	1.72443
1483	Positive	1.099	824.751	no MS2: Tripalmitin	[M+NH4]+	C51H98O6	Triacylglycerols	PVNIQBQSYATKKL-UHFFFAOYSA-N	CCCCCCCCCCCCCCCC(=O)OCC(COC(=O)CCCCCCCCCCCCCCC)OC(=O)CCCCCCCCCCCCCCC	4.5358	5.28e-07	1.35666
1484	Positive	15.256	579.484	Unknown	[M+H]+	null	null	null	null	0.086054	5.58e-07	1.31417
1485	Negative	1.175	226.984	no MS2: FT-PFSA; C4H5F5O3S	[M-H]-	C4H5F5O3S	Organosulfonic acids	POGJNMOVQNQIGY-UHFFFAOYSA-N	O=S(=O)(O)CCC(F)(F)C(F)(F)F	0.16046	5.62e-07	1.50723
1486	Positive	1.137	970.653	Unknown	[M+H]+	null	null	null	null	8.592	5.69e-07	1.21887
1487	Positive	1.024	742.815	Unknown	[M+H]+	null	null	null	null	22.942	5.7e-07	1.40464
1488	Positive	7.969	219.063	low score: Hydroxytyrosol Acetate	[M+Na]+	C10H12O4	Tyrosols and derivatives	FGJGLFPNIZXRLV-UHFFFAOYSA-N	O=C(OCCC1=CC=C(O)C(O)=C1)C	40.316	5.71e-07	1.50885
1489	Positive	11.037	546.394	Unknown	[M+H]+	null	null	null	null	0.25648	5.71e-07	1.47626
1490	Positive	10.837	664.462	Unknown	[M+H]+	null	null	null	null	17.814	5.73e-07	1.44852
1491	Positive	7.359	404.233	low score: NCGC00180558-02!	[M+NH4]+	C21H30O5	Naphthopyrans	SNDKOELNUHQSEY-UHFFFAOYSA-N	CC1CC(=O)C2=C(O1)OC3(C)CCC4(O)C(C)(C)CCC(=O)C4(C)C3C2	0.12593	5.78e-07	1.66231
1492	Positive	1.695	122.972	Unknown	[M+H]+	null	null	null	null	32.782	5.8e-07	1.19271
1493	Positive	10.552	302.169	no MS2: octyltyrazolone	[M+H]+	C18H23NO3	Alpha amino acids and derivatives	LETLVQJZVBVGKT-SSZFMOIBSA-N	OC1=CC=C(/C=C2N=C(CCCCCCCC)OC\2=O)C=C1	0.44798	5.8e-07	1.19042
1494	Positive	1.293	128.994	no MS2: 3-Thiophenecarboxylic acid	[M+H]+	C5H4O2S	Thiophene carboxylic acids	YNVOMSDITJMNET-UHFFFAOYSA-N	OC(=O)c(c1)csc1	13.788	5.84e-07	1.38338
1495	Positive	8.125	119.094	Unknown	[M+H]+	null	null	null	null	0.22274	6e-07	1.51285
1496	Positive	9.53	358.394	Unknown	[M+H]+	null	null	null	null	33.269	6.1e-07	1.47894
1497	Positive	14.296	782.628	Unknown	[M+H]+	null	null	null	null	0.15383	6.19e-07	1.15616
1498	Positive	0.425	353.244	low score: "(R)-4-((3R,5S,8R,9S,10S,13R,14S,17R)-3-hydroxy-10,13-dimethyl-7-oxohexadecahydro-1H-cyclopenta[a]phenanthren-17-yl)pent-2-enoic acid"	[M-2H2O+H]+	C24H36O4	Oxosteroids	MEFHLJCGADQRRZ-NLMWUSBQSA-N	C[C@@H]([C@H]1CC[C@]2([H])[C@]1(C)CC[C@@]3([H])[C@@]2([H])C(C[C@@]4([H])[C@]3(C)CC[C@@H](O)C4)=O)/C=C/C(O)=O	13.438	6.25e-07	1.26559
1499	Positive	1.274	255.011	low score: (4S,5Z,6S)-4-(2-methoxy-2-oxoethyl)-5-[2-[(E)-3-phenylprop-2-enoyl]oxyethylidene]-6-[(2S,3R,4S,5S,6R)-3,4,5-trihydroxy-6-(hydroxymethyl)oxan-2-yl]oxy-4H-pyran-3-carboxylic acid	[M+K]+	C12H8O4	8-methoxypsoralens	QXKHYNVANLEOEG-UHFFFAOYSA-N	O=C1OC2=C(OC)C=3OC=CC3C=C2C=C1	111.2	6.33e-07	1.49885
1500	Positive	13.477	703.639	Unknown	[M+H]+	null	null	null	null	0.076217	6.36e-07	1.3683
1501	Positive	1.15	154.068	no MS2: CREATINE	[M+Na]+	C4H9N3O2	Alpha amino acids and derivatives	CVSVTCORWBXHQV-UHFFFAOYSA-N	CN(CC(O)=O)C(N)=N	0.42259	6.46e-07	1.35976
1502	Positive	1.068	986.694	Unknown	[M+H]+	null	null	null	null	7.1859	6.46e-07	1.26697
1503	Positive	13.992	455.376	Unknown	[M+H]+	null	null	null	null	0.11793	6.49e-07	1.35911
1504	Positive	1.048	910.804	Unknown	[M+H]+	null	null	null	null	6.8739	6.52e-07	1.3
1505	Positive	1.016	750.846	Unknown	[M+H]+	null	null	null	null	34.349	6.53e-07	1.68267
1506	Positive	7.139	264.252	Unknown	[M+H]+	null	null	null	null	62.869	6.53e-07	1.52778
1507	Positive	0.425	342.822	Unknown	[M+H]+	null	null	null	null	12.165	6.54e-07	1.36181
1508	Positive	10.484	598.338	Unknown	[M+H]+	null	null	null	null	15.368	6.61e-07	1.47226
1509	Positive	0.224	786.666	Unknown	[M+H]+	null	null	null	null	0.045587	6.62e-07	1.44825
1510	Positive	13.784	171.11	no MS2: Levetiracetam	[M+H]+	C8H14N2O2	Alpha amino acids and derivatives	HPHUVLMMVZITSG-LURJTMIESA-N	O=C1N(CCC1)C(C(=N)O)CC	28.903	6.83e-07	1.55999
1511	Positive	1.192	842.653	Unknown	[M+H]+	null	null	null	null	8.6649	6.87e-07	1.354
1512	Positive	9.891	390.336	Unknown	[M+H]+	null	null	null	null	0.027893	7.01e-07	1.33205
1513	Positive	8.124	295.144	low score: 11-(phenylcarbonyl)-7,11-diazatricyclo[7.3.1.0<2,7>]trideca-2,4-dien-6-one	[M+H]+	C18H18N2O2	N-benzoylpiperidines	HODDQHCNQOBZKP-UHFFFAOYSA-N	C1C2CN(CC1C3=CC=CC(=O)N3C2)C(=O)C4=CC=CC=C4	0.062896	7.02e-07	1.53185
1514	Positive	14.122	698.557	Unknown	[M+H]+	null	null	null	null	0.04161	7.03e-07	1.65037
1515	Positive	13.963	699.57	Unknown	[M+H]+	null	null	null	null	0.030876	7.03e-07	1.40865
1516	Positive	8.783	582.352	low score: NCGC00381175-01!3-hydroxy-2-[[3-[3-(3-hydroxy-6-methylheptanoyl)oxy-6-methylheptanoyl]oxy-8-methylnonanoyl]amino]propanoic acid	[M+Na]+	C29H53NO9	N-acyl-alpha amino acids	MWZPHNZNPKKSEI-UHFFFAOYSA-N	CC(C)CCCCC(CC(=O)NC(CO)C(O)=O)OC(=O)CC(CCC(C)C)OC(=O)CC(O)CCC(C)C	0.11391	7.05e-07	1.49914
1517	Positive	7.805	494.285	low score: Dihydrogedunic Acid, Methyl Ester	[M+NH4]+	C26H36O8	Naphthopyrans	CDTMPWYDQKWYFT-IASWOTTCSA-N	O=C(OC1CC2C(C(=O)CCC2(C)C3CCC4(C)C(OC(=O)C5OC54C13C)C(=O)OC)(C)C)C	48.643	7.07e-07	1.16246
1518	Positive	1.021	804.903	Unknown	[M+H]+	null	null	null	null	10.785	7.08e-07	1.30989
1519	Positive	7.982	468.351	low score: Xefoampeptide D	[M+H]+	C25H45N3O5	Cyclic depsipeptides	VYFBCKJPZMCFAW-LSNYBQGISA-N	O=C1NC(C(C)(C)C)C(OC(CCCC)CC(N[C@H](CC(C)C)C(N[C@H]1CC(C)C)=O)=O)=O	0.1423	7.09e-07	1.38492
1520	Positive	1.296	124.095	HISTIDINOL	[M-H2O+H]+	C6H11N3O	Aralkylamines	ZQISRDCJNBUVMM-YFKPBYRVSA-N	N[C@H](CO)CC1=CN=CN1	5.2357	7.11e-07	1.58378
1521	Positive	9.155	476.314	Unknown	[M+H]+	null	null	null	null	0.18782	7.15e-07	1.42608
1522	Positive	0.429	281.88	Unknown	[M+H]+	null	null	null	null	106.27	7.17e-07	1.52578
1523	Positive	1.029	832.865	Unknown	[M+H]+	null	null	null	null	5.2869	7.19e-07	1.23274
1524	Positive	9.275	808.552	Unknown	[M+H]+	null	null	null	null	0.1004	7.22e-07	1.35929
1525	Positive	7.928	258.305	Unknown	[M+H]+	null	null	null	null	0.028592	7.26e-07	1.55876
1526	Positive	13.476	784.655	Unknown	[M+H]+	null	null	null	null	0.14923	7.27e-07	1.21938
1527	Negative	1.292	411.055	low score: Squamatic acid	[M+Na-2H]-	C19H18O9	Depsides and depsidones	WCWYEXBIRSSVGF-UHFFFAOYSA-N	Oc1c(C(=O)Oc2cc(C)c(c(O)c2C)C(=O)O)c(C)cc(OC)c1C(=O)O	0.23171	7.27e-07	1.38188
1528	Positive	1.044	890.823	no MS2: Triacylglycerol 17:0-18:1-18:1	[M+NH4]+	C56H104O6	Triacylglycerols	AODPJRSAPFUPKT-FCUXXRGKSA-N	C(CCCCCCCCC)CCCC=CCCC(=O)OC(COC(=O)CCCCCCCCCCCCCCCC)COC(CCC=CCCCCCCCCCCCCC)=O	6.1867	7.28e-07	1.29557
1529	Positive	13.349	420.25	low score: Phytosphingosine-1-P	[M+Na]+	C18H40NO6P	Phosphosphingolipids	AYGOSKULTISFCW-KZNAEPCWSA-N	CCCCCCCCCCCCCC[C@H]([C@@H]([C@@H](COP(=O)(O)O)N)O)O	0.11796	7.31e-07	1.60582
1530	Positive	14.542	369.233	low score: 5-(3-methoxyphenyl)-N-((octahydro-1H-quinolizin-1-yl)methyl)-1H-pyrazole-3-carboxamide	[M+H]+	C21H28N4O2	Phenylpyrazoles	ZZFSKJIAKIBPSR-UHFFFAOYSA-N	O=C(NCC1CCCN2CCCCC21)C3=NNC(=C3)C=4C=CC=C(OC)C4	0.11221	7.31e-07	1.5601
1531	Positive	15.126	623.506	Unknown	[M+H]+	null	null	null	null	0.070473	7.56e-07	1.54827
1532	Positive	9.174	570.322	low score: 3-[(3R,5S,10R,13R,14S,17R)-5,14-dihydroxy-10,13-dimethyl-3-[(2R,3R,4S,5S,6R)-3,4,5-trihydroxy-6-(hydroxymethyl)oxan-2-yl]oxy-2,3,4,6,7,8,9,11,12,15,16,17-dodecahydro-1H-cyclopenta[a]phenanthren-17-yl]-2H-furan-5-one	[M+NH4]+	C29H44O10	Cardenolide glycosides and derivatives	FECZMYDDHKVQIA-MHLHJPRMSA-N	O=C1OCC(=C1)C2CCC3(O)C4CCC5(O)CC(OC6OC(CO)C(O)C(O)C6O)CCC5(C)C4CCC23C	11.847	7.57e-07	1.29821
1533	Positive	8.129	847.514	Unknown	[M+H]+	null	null	null	null	0.0023887	7.6e-07	1.42432
1534	Positive	8.541	594.309	low score: Ergocristam	[M+H]+	C35H39N5O4	Ergopeptams	KMDKLWZQLMBIBS-HVWSGMRBSA-N	CC(C)[C@@H](C(=O)N1[C@H](C(=O)N2CCC[C@@H]2C1=O)CC3=CC=CC=C3)NC(=O)[C@H]4CN([C@@H]5CC6=CNC7=CC=CC(=C67)C5=C4)C	20.413	7.61e-07	1.3557
1535	Positive	1.019	896.86	no MS2: (NAG)(NAM)-AemA;(G-G)-(NAG)(NAM)[r]-Aem	[M+2H]2+	C71H117N13O40	Oligopeptides	TYSDIIIOAAJYCL-UHFFFAOYSA-N	CC(=O)NC(CO)C(OC(C)C(=O)NC(C)C(=O)NC(CCC(=O)NC(CCCC(N)C(=O)O)C(=O)O)C(=O)O)C(OC1OC(CO)C(OC2OC(CO)C(OC3OC(CO)C(O)C(O)C3NC(C)=O)C(OC(C)C(=O)NC(C)C(=O)NC(CCC(=O)NC(CCCC(N)C(=O)O)C(=O)NC(C)C(=O)O)C(=O)O)C2NC(C)=O)C(O)C1NC(C)=O)C(O)CO	22.196	7.65e-07	1.51781
1536	Positive	0.38	313.236	low score: Guggulsterone E&Z	[M+H]+	C21H28O2	Androgens and derivatives	WDXRGPWQVHZTQJ-AYSLTRBKSA-N	O=C1C=C2CCC3C4CC(=O)C(=CC)C4(C)CCC3C2(C)CC1	3.6864	7.69e-07	1.12896
1537	Positive	1.037	658.89	Unknown	[M+H]+	null	null	null	null	12.07	7.79e-07	1.45237
1538	Positive	2.105	205.105	no MS2: MMV393995	[M+H]+	C10H12N4O	Pyrimidones	XIFVEJXUSTTZKD-UHFFFAOYSA-N	OC=1N=C(N=C(C1)C)N2N=C(C=C2C)C	0.24343	7.8e-07	1.26688
1539	Positive	16.557	664.584	Unknown	[M+H]+	null	null	null	null	0.10248	7.93e-07	1.28342
1540	Positive	0.742	389.845	Unknown	[M+H]+	null	null	null	null	12.146	7.93e-07	1.48002
1541	Positive	1.035	738.914	Unknown	[M+H]+	null	null	null	null	8.7622	7.93e-07	1.35985
1542	Positive	11.628	427.333	low score: "methyl (6R,E)-2-methyl-6-((3R,5S,7R,9S,10S,12S,13R,14S,17R)-3,7,12-trihydroxy-10,13-dimethylhexadecahydro-1H-cyclopenta[a]phenanthren-17-yl)hept-2-enoate"	[M-2H2O+H]+	C28H46O5	Trihydroxy bile acids, alcohols and derivatives	SZDHRKMCESZUCV-WKGGVHHNSA-N	[H][C@@]12[C@H](O)C[C@@H]3C[C@H](O)CC[C@]3(C)[C@H]1C[C@H](O)[C@@]4(C)[C@H]2CC[C@@H]4[C@@H](CC/C=C(C)/C(OC)=O)C	11.384	8.06e-07	1.40497
1543	Positive	1.228	246.266	Unknown	[M+H]+	null	null	null	null	0.13665	8.08e-07	1.26469
1544	Positive	0.093	529.459	Unknown	[M+H]+	null	null	null	null	0.12157	8.09e-07	1.57738
1545	Positive	6.49	488.305	low score: glycocholic acid	[M+Na]+	C26H43NO6	Glycinated bile acids and derivatives	RFDAIACWWDREDC-VKRKCYKBSA-N	C[C@H](CCC(=O)NCC(=O)O)[C@H]1CC[C@@H]2[C@@]1([C@H](C[C@H]3[C@H]2[C@@H](C[C@H]4[C@@]3(CC[C@H](C4)O)C)O)O)C	2.3361	8.12e-07	1.40642
1546	Positive	1.04	758.812	Unknown	[M+H]+	null	null	null	null	3.1445	8.15e-07	1.28404
1547	Positive	7.922	207.047	low score: 5-(1,2-dithiolan-3-yl)pentanoic acid	[M+H]+	C8H14O2S2	Lipoic acids and derivatives	AGBQKNBQESQNJD-UHFFFAOYSA-N	O=C(O)CCCCC1SSCC1	4.0188	8.26e-07	1.56702
1548	Positive	1.031	840.902	Unknown	[M+H]+	null	null	null	null	4.903	8.28e-07	1.03535
1549	Positive	6.045	205.102	low score: Tryptophan	[M+H]+	C11H12N2O2	Indolyl carboxylic acids and derivatives	QIVBCDIJIAJPQS-UHFFFAOYSA-N	C1=CC=C2C(=C1)C(=CN2)CC(C(=O)O)N	0.31709	8.29e-07	1.29298
1550	Positive	0.736	248.053	no MS2: Emtricitabine	[M+H]+	C8H10FN3O3S	3'-thia pyrimidine nucleosides	XQSPYNMVSIKCOC-NTSWFWBYSA-N	FC=1\C(=N/C(=O)N(C=1)[C@H]2O[C@H](SC2)CO)\N	7.8614	8.39e-07	1.29224
1551	Positive	0.576	205.101	no MS2: Tryptophan; PlaSMA ID-689	[M+H]+	C11H12N2O2	Indole and derivatives	QIVBCDIJIAJPQS-UHFFFAOYNA-N	O=C(O)C(N)CC2=CNC=1C=CC=CC=12	0.39201	8.44e-07	1.22971
1552	Positive	6.446	347.253	low score: (3S)-5-[(1R,2R,8aS)-2-hydroxy-2,5,5,8a-tetramethyl-3,4,4a,6,7,8-hexahydro-1H-naphthalen-1-yl]-3-methylpentanoic acid	[M+Na]+	C20H36O3	Diterpenoids	KHCCSRVJJDOANA-ZOSGAXDSSA-N	O=C(O)CC(C)CCC1C(O)(C)CCC2C(C)(C)CCCC12C	0.13564	8.47e-07	1.26736
1553	Positive	0.519	172.966	Unknown	[M+H]+	null	null	null	null	135.96	8.48e-07	1.55824
1554	Positive	1.105	562.805	Unknown	[M+H]+	null	null	null	null	5.3136	8.5e-07	1.28675
1555	Positive	1.056	813.877	Unknown	[M+H]+	null	null	null	null	4.7836	8.5e-07	1.47032
1556	Positive	17.949	223.08	no MS2: 2-methylanthra-9,10-quinone	[M+H]+	C15H10O2	Anthraquinones	NJWGQARXZDRHCD-UHFFFAOYSA-N	O=C1C=2C=CC=CC2C(=O)C3=CC(=CC=C13)C	17.242	8.6e-07	1.43676
1557	Positive	1.266	437.083	Unknown	[M+H]+	null	null	null	null	157.43	8.73e-07	1.5695
1558	Positive	1.114	770.691	Unknown	[M+H]+	null	null	null	null	4.3479	8.73e-07	1.17739
1559	Positive	1.101	826.746	Unknown	[M+H]+	null	null	null	null	5.5267	8.8e-07	1.31267
1560	Positive	1.04	808.886	Unknown	[M+H]+	null	null	null	null	4.8238	8.83e-07	1.04575
1561	Positive	1.077	678.774	Unknown	[M+H]+	null	null	null	null	5.1847	8.9e-07	1.19491
1562	Positive	10.487	616.31	low score: Hypaconitine	[M+H]+	C33H45NO10	Aconitane-type diterpenoid alkaloids	FIDOCHXHMJHKRW-ILSCITHTSA-N	O=C(OC1C2C3CC1(O)C(OC)C(O)C2(OC(=O)C)C4C(OC)C5C6(COC)CN(C)C4C35C(OC)CC6)C=7C=CC=CC7	128.5	8.98e-07	1.54165
1563	Positive	9.399	604.454	low score: (1R,6R,10S,11R,13S,15R)-1,6-dihydroxy-8-(hydroxymethyl)-4,12,12,15-tetramethyl-5-oxotetracyclo[8.5.0.0?,?.0??,??]pentadeca-3,8-dien-13-yl hexadecanoate	[M+NH4]+	C36H58O6	Phorbol esters	QUVRUINWOFZNJL-QNMVXEMISA-N	O=C(OC12CC(C)C3(O)C(C=C(CO)CC4(O)C(=O)C(=CC43)C)C1C2(C)C)CCCCCCCCCCCCCCC	0.12585	9.16e-07	1.2592
1564	Positive	1.019	736.912	Unknown	[M+H]+	null	null	null	null	16	9.22e-07	1.26643
1565	Positive	1.098	712.723	Unknown	[M+H]+	null	null	null	null	7.4101	9.22e-07	1.2645
1566	Positive	6.429	481.293	low score: 6-oxopristimerol	[M+H]+	C30H40O5	Phenanthrenes and derivatives	QHONUEZGTQYXKH-GOSHRYQWSA-N	OC(C(O)=C1)=C(C)C2=C1[C@@]3(C)C([C@](CC[C@]4(C)C5C[C@](C)(C(OC)=O)CC4)(C)[C@@]5(C)CC3)=CC2=O	7.8858	9.42e-07	1.26981
1567	Positive	1.111	724.789	Unknown	[M+H]+	null	null	null	null	6.66	9.47e-07	1.28205
1568	Positive	7.139	219.191	low score: Tributylphosphine oxide	[M+H]+	C12H27OP	Organophosphine oxides	MNZAKDODWSQONA-UHFFFAOYSA-N	CCCCP(=O)(CCCC)CCCC	12.819	9.48e-07	1.6417
1569	Positive	7.07	387.21	low score: Sufentanil	[M+H]+	C22H30N2O2S	Anilides	GGCSSNBKKAUURC-UHFFFAOYSA-N	[H]C([H])([H])OC([H])([H])C(N(C(=O)C([H])([H])C([H])([H])[H])c(c([H])3)c([H])c([H])c([H])c([H])3)(C([H])([H])1)C([H])([H])C([H])([H])N(C([H])([H])C([H])([H])c(s2)c([H])c([H])c([H])2)C([H])([H])1	5.7463	9.52e-07	1.16821
1570	Negative	19.871	199.801	Unknown	[M-H]-	null	null	null	null	0.34364	9.52e-07	1.32931
1571	Positive	7.919	223.079	low score: Cystathionine	[M+H]+	C7H14N2O4S	L-cysteine-S-conjugates	ILRYLPWNYFXEMH-WHFBIAKZSA-N	OC(=O)[C@@H](N)CCSC[C@@H](N)C(O)=O	17.258	9.64e-07	1.71436
1572	Positive	8.771	494.842	Unknown	[M+H]+	null	null	null	null	100.61	9.74e-07	1.59582
1573	Positive	8.65	330.359	Unknown	[M+H]+	null	null	null	null	17.833	9.77e-07	1.45101
1574	Positive	1.023	616.862	Unknown	[M+H]+	null	null	null	null	19.677	9.82e-07	1.63113
1575	Positive	0.533	304.82	Unknown	[M+H]+	null	null	null	null	343.23	9.84e-07	1.64848
1576	Positive	18.411	223.079	no MS2: 2-methylanthra-9,10-quinone	[M+H+Na]2+	C15H10O2	Anthraquinones	NJWGQARXZDRHCD-UHFFFAOYSA-N	O=C1C=2C=CC=CC2C(=O)C3=CC(=CC=C13)C	20.086	9.91e-07	1.51279
1577	Positive	0.425	293.906	Unknown	[M+H]+	null	null	null	null	33.634	9.99e-07	1.33857
1578	Positive	8.369	548.315	low score: (2S,3R,5S,9R)-2,3-dihydroxy-14-(hydroxymethyl)-5,9-dimethyl-14-{[(2S,3R,4S,5S,6R)-3,4,5-trihydroxy-6-(hydroxymethyl)oxan-2-yl]oxy}tetracyclo[11.2.1.0?,??.0?,?]hexadecane-5-carboxylic acid	[M+NH4]+	C26H42O11	Diterpene glycosides	QUCGBWQRLWOVBR-BBJJSLPGSA-N	O=C(O)C1(C)CCCC2(C)C3CCC4CC3(CC4(OC5OC(CO)C(O)C(O)C5O)CO)C(O)C(O)C12	14.441	1.01e-06	1.41489
1579	Positive	6.335	504.339	low score: glutamate conjugated chenodeoxycholic acid	[M-H2O+H]+	C29H47NO7	Glycinated bile acids and derivatives	MHOZNCAVRHAOKT-PYDJSGOHSA-N	O=C(O)CCC(N=C(O)CCC(C)C1CCC2C3C(O)CC4CC(O)CCC4(C)C3CCC12C)C(=O)O	2.5171	1.01e-06	1.31873
1580	Positive	1.029	630.837	Unknown	[M+H]+	null	null	null	null	10.599	1.02e-06	1.51143
1581	Positive	13.855	283.262	OLEATE	[M+H]+	C18H34O2	Long-chain fatty acids	ZQPPMHVWECSIRJ-KTKRTIGZSA-N	CCCCCCCC/C=C\CCCCCCCC(=O)O	3.5838	1.02e-06	1.16959
1582	Positive	0.523	241.847	Unknown	[M+H]+	null	null	null	null	40.601	1.03e-06	1.47968
1583	Positive	1.089	588.767	no MS2: (NAG)(anNAM)-AqKAA[3-NH2-GGGG]	[M+2H]2+	C47H77N13O22	Polypeptides	NKPYYNVJGCWBCQ-UHFFFAOYSA-N	CC(=O)NC1C(OC2C3COC(O3)C(NC(C)=O)C2OC(C)C(=O)NC(C)C(=O)NC(CCC(=O)NC(CCCCNC(=O)CNC(=O)CNC(=O)CNC(=O)CN)C(=O)NC(C)C(=O)NC(C)C(=O)O)C(N)=O)OC(CO)C(O)C1O	4.0539	1.04e-06	1.20074
1584	Positive	1.039	746.855	Unknown	[M+H]+	null	null	null	null	3.2331	1.04e-06	1.16337
1585	Positive	0.644	172.967	Unknown	[M+H]+	null	null	null	null	114.12	1.05e-06	1.51353
1586	Positive	14.54	758.636	Unknown	[M+H]+	null	null	null	null	0.15614	1.05e-06	1.1959
1587	Positive	1.115	816.719	no MS2: Triacylglycerol 14:0-16:1-18:3	[M+NH4]+	C51H90O6	Triacylglycerols	ZZRGFLVYILOXAK-XAGYIBRRSA-N	C(C(OC(=O)CCC=CCCCCCCCCCCC)COC(CCCCCCCCCCCCC)=O)OC(=O)CCC=CCC=CCC=CCCCCCCC	3.2591	1.05e-06	1.13433
1588	Positive	8.711	432.281	low score: NCGC00381130-01!methyl (2E,8E)-9-[3a-hydroxy-6,7-dimethyl-1-(2-methylpropyl)-3-oxo-2,4,7,7a-tetrahydro-1H-isoindol-4-yl]-4,5-dihydroxy-8-methylnona-2,8-dienoate [IIN-based on: CCMSLIB00000846918]	[M+NH4]+	C25H39NO6	Bicyclic monoterpenoids	YUXUTEAAGHFKKH-MKQCFFQWSA-N	COC(=O)\\C=C\\C(O)C(O)CC\\C(C)=C\\C1C=C(C)C(C)C2C(CC(C)C)NC(=O)C12O	0.067708	1.06e-06	1.45856
1589	Positive	13.554	531.321	low score: Kukoamine A	[M+H]+	C28H42N4O6	Catechols	IOLDDENZPBFBHV-UHFFFAOYSA-N	O=C(NCCCNCCCCNCCCNC(=O)CCC1=CC=C(O)C(O)=C1)CCC2=CC=C(O)C(O)=C2	0.076409	1.06e-06	1.49281
1590	Positive	6.446	331.196	low score: Carnosol	[M+H]+	C20H26O4	Diterpene lactones	XUSYGBPHQBWGAD-PJSUUKDQSA-N	O=C1OC2C3=CC(=C(O)C(O)=C3C14CCCC(C)(C)C4C2)C(C)C	4.7419	1.06e-06	1.35379
1591	Negative	7.818	449.152	low score: 1-[2,4-dihydroxy-6-[(2S,3R,4S,5S,6R)-3,4,5-trihydroxy-6-(hydroxymethyl)oxan-2-yl]oxyphenyl]-3-(4-methoxyphenyl)propan-1-one	[M-H]-	C22H26O10	Flavonoid O-glycosides	GOTAZLUFLPHQJU-MIUGBVLSSA-N	O=C(C=1C(O)=CC(O)=CC1OC2OC(CO)C(O)C(O)C2O)CCC3=CC=C(OC)C=C3	2.6496	1.06e-06	1.43907
1592	Positive	18.358	859.602	Unknown	[M+H]+	null	null	null	null	0.11597	1.07e-06	1.45091
1593	Positive	0.437	260.907	Unknown	[M+H]+	null	null	null	null	24.906	1.09e-06	1.33511
1594	Positive	14.067	283.26	OLEATE	[M+H]+	C18H34O2	Long-chain fatty acids	ZQPPMHVWECSIRJ-KTKRTIGZSA-N	CCCCCCCC/C=C\CCCCCCCC(=O)O	2.415	1.1e-06	1.26385
1595	Positive	8.911	301.167	low score: adrenosterone	[M+H]+	C19H24O3	Androgens and derivatives	RZRPTBIGEANTGU-IRIMSJTPSA-N	O=C1C=C2CCC3C(C(=O)CC4(C(=O)CCC34)C)C2(C)CC1	0.33134	1.1e-06	1.2384
1596	Positive	1.031	504.882	Unknown	[M+H]+	null	null	null	null	9.9167	1.11e-06	1.49366
1597	Positive	8.538	636.276	no MS2: (NAG)(anMUR)-Aq	[M+ACN+H]+	C25H41N5O14	Dipeptides	XUEWAMZWAWHUPZ-UHFFFAOYSA-N	CC(=O)NC1C(OC2C3COC(O3)C(N)C2OC(C)C(=O)NC(C)C(=O)NC(CCC(=O)O)C(N)=O)OC(CO)C(O)C1O	17.301	1.11e-06	1.48436
1598	Positive	1.022	940.888	Unknown	[M+H]+	null	null	null	null	8.3774	1.11e-06	1.22322
1599	Positive	18.622	708.578	Unknown	[M+H]+	null	null	null	null	0.12272	1.12e-06	1.63307
1600	Positive	0.43	238.85	Unknown	[M+H]+	null	null	null	null	101.3	1.12e-06	1.52386
1601	Negative	8.97	607.308	Unknown	[M-H]-	null	null	null	null	0.48617	1.12e-06	1.29353
1602	Positive	14.097	273.186	no MS2: h_92_oxabolone	[M-H2O+H]+	C18H26O3	Estrogens and derivatives	GXHBCWCMYVTJOW-DNBWYCQVSA-N	O[C@H]1CCC2C3CCC4=C(O)C(CCC4C3CC[C@@]21C)=O	8.5142	1.14e-06	1.56925
1603	Positive	6.36	100.083	no MS2: 2-Piperidone; CE0; XUWHAWMETYGRKB-UHFFFAOYSA-N	[M+H]+	C5H9NO	Piperidinones	XUWHAWMETYGRKB-UHFFFAOYSA-N	C1CCN=C(C1)O	13.301	1.15e-06	1.61303
1604	Positive	0.069	441.323	no MS2: Leupeptin Pr-LL	[M+H]+	C21H40N6O4	Dipeptides	BFUKWVVFVGUARP-GTPINHCMSA-N	CC(CC(NC(CC)=O)C(NC(C(N[C@H](C=O)CCC/N=C(N)\N)=O)CC(C)C)=O)C	0.22316	1.19e-06	1.30982
1605	Positive	14.921	100.083	no MS2: 2-Piperidone; CE0; XUWHAWMETYGRKB-UHFFFAOYSA-N	[M+H]+	C5H9NO	Piperidinones	XUWHAWMETYGRKB-UHFFFAOYSA-N	C1CCN=C(C1)O	26.207	1.2e-06	1.60307
1606	Positive	1.078	682.766	Unknown	[M+H]+	null	null	null	null	2.8591	1.2e-06	1.18144
1607	Positive	1.123	318.24	no MS2: Drofenine	[M+H]+	C20H31NO2	Benzene and substituted derivatives	AGJBLWCLQCKRJP-UHFFFAOYSA-N	[H]c(c([H])2)c([H])c([H])c(c([H])2)C([H])(C(=O)OC([H])([H])C([H])([H])N(C([H])([H])C([H])([H])[H])C([H])([H])C([H])([H])[H])C([H])(C([H])([H])1)C([H])([H])C([H])([H])C([H])([H])C([H])([H])1	0.084579	1.21e-06	1.17416
1608	Positive	1.136	157.095	no MS2: SUBERATE	[M+H+Na]2+	C8H14O4	Medium-chain fatty acids	TYFQFVWCELRYAO-UHFFFAOYSA-N	OC(=O)CCCCCCC(O)=O	2.9876	1.23e-06	1.49178
1609	Positive	1.067	928.808	Unknown	[M+H]+	null	null	null	null	4.5584	1.23e-06	1.23001
1610	Positive	6.543	100.084	no MS2: 2-Piperidone; CE0; XUWHAWMETYGRKB-UHFFFAOYSA-N	[M+H]+	C5H9NO	Piperidinones	XUWHAWMETYGRKB-UHFFFAOYSA-N	C1CCN=C(C1)O	13.802	1.24e-06	1.65628
1611	Positive	0.062	121.073	no MS2: Urea	[2M+H]+	CH4N2O	Ureas	XSQUKJJJFZCRTK-UHFFFAOYSA-N	NC(N)=O	4.6367	1.25e-06	1.48878
1612	Positive	1.281	435.108	low score: NCGC00380419-01_C19H24O8S_3-[(11,13-Dihydroxy-4-methyl-2,10-dioxo-1,4,5,6,7,8,9,10-octahydro-2H-3-benzoxacyclododecin-8-yl)sulfanyl]-2-hydroxypropanoic acid	[M+Na]+	C19H24O8S	Macrolides and analogues	XQMZRINLFAOTEN-UHFFFAOYSA-N	CC1CCCC(CC(=O)C2=C(O)C=C(O)C=C2CC(=O)O1)SCC(O)C(O)=O	28.968	1.25e-06	1.36437
1613	Positive	1.057	814.837	Unknown	[M+H]+	null	null	null	null	5.8772	1.25e-06	1.18194
1614	Positive	0.425	238.9	Unknown	[M+H]+	null	null	null	null	24.244	1.27e-06	1.18344
1615	Positive	9.01	586.363	Unknown	[M+H]+	null	null	null	null	0.12565	1.27e-06	1.24906
1616	Positive	12.073	583.364	low score: Dihydrobacillaene	[M+H]+	C34H50N2O6	Medium-chain fatty acids	VGZNPOHVJNZAOU-OISZERLPSA-N	CC(C)CC(C(=O)NCCCC=CC=CC(=CC=CC=C(C)C(CC(=O)NC(=CC=CC=CC(C)C(=O)O)C)O)C)O	16.889	1.29e-06	1.15629
1617	Positive	0.449	141.959	Unknown	[M+H]+	null	null	null	null	88.113	1.29e-06	1.26564
1618	Positive	6.374	400.283	low score: Nakijiquinone O	[M+H]+	C25H37NO3	Prenylquinones	FNCUIBSVSDQFCR-UHFFFAOYSA-N	CC(CNC(C(C(CC1(C)C(C)CCC2(C)C(C)=CCCC21)=C3O)=O)=CC3=O)C	7.9215	1.29e-06	1.49296
1619	Positive	14.553	786.672	Unknown	[M+H]+	null	null	null	null	0.063351	1.3e-06	1.5252
1620	Positive	1.417	124.095	low score: HISTIDINOL	[M-H2O+H]+	C6H11N3O	Aralkylamines	ZQISRDCJNBUVMM-YFKPBYRVSA-N	N[C@H](CO)CC1=CN=CN1	5.5305	1.31e-06	1.64714
1621	Positive	1.086	654.763	Unknown	[M+H]+	null	null	null	null	7.8845	1.33e-06	1.62756
1622	Positive	7.164	257.185	low score: Bakuchiol	[M+H]+	C18H24O	Aromatic monoterpenoids	LFYJSSARVMHQJB-QIXNEVBVSA-N	OC1=CC=C(C=C1)C=CC(C=C)(C)CCC=C(C)C	2.7809	1.33e-06	1.45787
1623	Positive	9.553	570.4	low score: "(4R)-4-((3R,5S,7R,9S,10S,13R,14S,17R)-3,7-dihydroxy-10,13-dimethylhexadecahydro-1H-cyclopenta[a]phenanthren-17-yl)-N-methyl-N-((2S,3R,4R,5R)-2,3,4,5,6-pentahydroxyhexyl)pentanamide"	[M+H]+	C31H55NO8	Dihydroxy bile acids, alcohols and derivatives	KUXSAFRZQPYINU-SGWAQUIASA-N	C[C@H](CCC(N(C)C[C@H](O)[C@@H](O)[C@@H]([C@@H](CO)O)O)=O)[C@H]1CC[C@H]2[C@]3([H])[C@H](O)C[C@@H]4C[C@H](O)CC[C@]4(C)[C@H]3CC[C@@]21C	0.047973	1.33e-06	1.30393
1624	Positive	9.026	588.276	Unknown	[M+H]+	null	null	null	null	136.06	1.34e-06	1.63148
1625	Positive	12.617	295.246	Unknown	[M+H]+	null	null	null	null	0.44163	1.36e-06	1.02529
1626	Positive	1.123	138.068	no MS2: Isonicotinate hydrazide	[M+H]+	C6H7N3O	Pyridinecarboxylic acids and derivatives	QRXWMOHMRWLFEY-UHFFFAOYSA-N	NNC(=O)c(c1)ccnc1	0.19651	1.38e-06	1.24719
1627	Positive	0.426	263.911	Unknown	[M+H]+	null	null	null	null	47.215	1.38e-06	1.46408
1628	Positive	6.121	356.218	low score: NCGC00384969-01_C22H31NO4_(5R)-3-({(1S,2R,4aS,6R,8aR)-1,6-Dimethyl-2-[(1E)-1-propen-1-yl]-1,2,4a,5,6,7,8,8a-octahydro-1-naphthalenyl}carbonyl)-4-hydroxy-5-(hydroxymethyl)-1-methyl-1,5-dihydro-2H-pyrrol-2-one	[M-H2O+H]+	C22H31NO4	Pyrrolines	YHKYFYCSTJGMID-JWROMMBDSA-N	C\C=C\[C@@H]1\C=C/[C@@H]2C[C@H](C)CC[C@H]2[C@]1(C)C(=O)/C3=C(O)/[C@@H](CO)N(C)C3=O	3.6435	1.38e-06	1.39993
1629	Positive	7.806	472.302	no MS2: GLYCOCHENODEOXYCHOLATE	[M+Na]+	C26H43NO5	Glycinated bile acids and derivatives	GHCZAUBVMUEKKP-UHFFFAOYSA-N	CC(CCC(=O)NCC(=O)O)C1CCC2C1(CCC3C2C(CC4C3(CCC(C4)O)C)O)C	4.619	1.38e-06	1.13156
1630	Positive	12.129	530.386	Unknown	[M+H]+	null	null	null	null	0.068016	1.39e-06	1.29988
1631	Positive	1.094	894.741	Unknown	[M+H]+	null	null	null	null	5.5841	1.4e-06	1.20957
1632	Positive	6.907	100.083	no MS2: 2-Piperidone; CE0; XUWHAWMETYGRKB-UHFFFAOYSA-N	[M+H]+	C5H9NO	Piperidinones	XUWHAWMETYGRKB-UHFFFAOYSA-N	C1CCN=C(C1)O	15.724	1.41e-06	1.57814
1633	Positive	1.017	838.898	Unknown	[M+H]+	null	null	null	null	11.333	1.41e-06	1.32207
1634	Positive	6.496	466.295	low score: taurolithocholic acid	[M-H2O+H]+	C26H45NO5S	Taurinated bile acids and derivatives	QBYUNVOYXHFVKC-RQAFQGPPSA-N	C[C@H](CCC(=O)NCCS(=O)(=O)O)[C@H]1CC[C@@H]2[C@@]1(CC[C@H]3[C@H]2CC[C@H]4[C@@]3(CC[C@H](C4)O)C)C	18.705	1.42e-06	1.1646
1635	Positive	8.118	846.518	Unknown	[M+H]+	null	null	null	null	0.0021859	1.42e-06	1.49801
1636	Positive	1.023	930.859	Unknown	[M+H]+	null	null	null	null	14.005	1.43e-06	1.4362
1637	Positive	8.463	504.327	low score: glutamate conjugated chenodeoxycholic acid	[M-H2O+H]+	C29H47NO7	Glycinated bile acids and derivatives	MHOZNCAVRHAOKT-PYDJSGOHSA-N	O=C(O)CCC(N=C(O)CCC(C)C1CCC2C3C(O)CC4CC(O)CCC4(C)C3CCC12C)C(=O)O	5.2526	1.45e-06	1.47563
1638	Positive	0.428	306.915	Unknown	[M+H]+	null	null	null	null	14.624	1.45e-06	1.24514
1639	Positive	0.441	199.086	low score: Azobenzol	[M+H]+	C12H10N2O	Benzene and substituted derivatives	GAUZCKBSTZFWCT-UHFFFAOYSA-N	c1(\[N+](=N\c2ccccc2)[O-])ccccc1	5.1936	1.47e-06	1.19586
1640	Positive	7.829	603.33	low score: NCGC00381318-01![3-methyl-1-[3-methyl-1-[3-methyl-1-oxo-1-(2,3,4,5,6-pentahydroxyhexoxy)pentan-2-yl]oxy-1-oxopentan-2-yl]oxy-1-oxopentan-2-yl] 2-hydroxy-3-methylpentanoate [IIN-based on: CCMSLIB00000845116]	[M-2H2O+H]+	C30H54O14	Depsipeptides	XHFZCGJKWBSHAG-UHFFFAOYSA-N	CCC(C)C(O)C(=O)OC(C(C)CC)C(=O)OC(C(C)CC)C(=O)OC(C(C)CC)C(=O)OCC(O)C(O)C(O)C(O)CO	0.12322	1.47e-06	1.29277
1641	Positive	9.584	643.326	low score: Rubusoside	[M+H]+	C32H50O13	Steviol glycosides	YWPVROCHNBYFTP-AKEPRJKISA-N	O=C(OC1OC(CO)C(O)C(O)C1O)C2(C)CCCC3(C)C2CCC45CC(=C)C(OC6OC(CO)C(O)C(O)C6O)(CCC43)C5	10.315	1.47e-06	1.47116
1642	Positive	1.638	100.083	N-Methyl-2-pyrrolidone	[M+H]+	C5H9NO	N-alkylpyrrolidines	SECXISVLQFMRJM-UHFFFAOYSA-N	CN1CCCC1=O	14.267	1.48e-06	1.64874
1643	Positive	11.814	650.489	low score: phosphatidylethanolamine (14:0/15:0)	[M+H]+	C34H68NO8P	Phosphatidylethanolamines	VQQFJLCUEFKGHJ-JGCGQSQUSA-N	[H][C@@](COC(=O)CCCCCCCCCCCCC)(COP(O)(=O)OCCN)OC(=O)CCCCCCCCCCCCCC	0.30098	1.49e-06	1.28608
1644	Positive	8.533	539.349	low score: milnamide A	[M+H]+	C31H46N4O4	Beta carbolines	DTDKDYCVVOKSAV-MNDPQUGUSA-N	CC(C(N(C(C(NC(C1C(C)(C(C2=CC=CC=C23)=C(CN1C)N3C)C)=O)C(C)(C)C)=O)C)/C=C(C(O)=O)/C)C	11.217	1.52e-06	1.35789
1645	Positive	1.157	164.04	no MS2: N-ACETYL-L-CYSTEINE	[M+H]+	C5H9NO3S	N-acyl-L-alpha-amino acids	PWKSKIMOESPYIA-BYPYZUCNSA-N	CC(=O)N[C@@H](CS)C(=O)O	2.1682	1.55e-06	1.43157
1646	Positive	14.307	451.251	low score: Ingenol-3,4-5,20-diacetonide	[M+Na]+	C26H36O5	Ketals	JOKBBQPBIIZMJV-JQFFUGKZSA-N	O=C1C2C=C3COC(OC3C45OC(OC5C(=CC14C(C)CC6C2C6(C)C)C)(C)C)(C)C	13.497	1.55e-06	1.33217
1647	Positive	1.086	612.773	Unknown	[M+H]+	null	null	null	null	5.7736	1.57e-06	1.20524
1648	Positive	13.461	331.309	low score: MMV687273	[M+H]+	C22H38N2	Monoterpenoids	JFIBVDBTCDTBRH-IDUWFGFVSA-N	C(=C(C)C)CCC(=CCNCCNC1C2CC3CC(C2)CC1C3)C	0.0044832	1.59e-06	1.11591
1649	Positive	1.186	904.61	Unknown	[M+H]+	null	null	null	null	7.3821	1.6e-06	1.2072
1650	Positive	1.048	992.824	Unknown	[M+H]+	null	null	null	null	5.0039	1.6e-06	1.17117
1651	Positive	1.137	436.852	Unknown	[M+H]+	null	null	null	null	4.4231	1.61e-06	1.37811
1652	Positive	1.067	880.855	Unknown	[M+H]+	null	null	null	null	4.0521	1.61e-06	1.33971
1653	Positive	11.05	301.169	low score: adrenosterone	[M+H]+	C19H24O3	Androgens and derivatives	RZRPTBIGEANTGU-IRIMSJTPSA-N	O=C1C=C2CCC3C(C(=O)CC4(C(=O)CCC34)C)C2(C)CC1	0.31223	1.64e-06	1.27541
1654	Positive	11.872	377.293	Unknown	[M+H]+	null	null	null	null	6.4058	1.65e-06	1.1197
1655	Positive	0.551	100.083	N-Methyl-2-pyrrolidone	[M+H]+	C5H9NO	N-alkylpyrrolidines	SECXISVLQFMRJM-UHFFFAOYSA-N	CN1CCCC1=O	11.398	1.67e-06	1.61571
1656	Positive	1.14	146.13	low score: Lysinamide	[M+H]+	C6H15N3O	Alpha amino acid amides	HKXLAGBDJVHRQG-YFKPBYRVSA-N	NCCCC[C@H](N)C(N)=O	0.23446	1.67e-06	1.1473
1657	Positive	0.476	105.935	Unknown	[M+H]+	null	null	null	null	67.166	1.68e-06	1.20695
1658	Positive	0.637	185.996	Unknown	[M+H]+	null	null	null	null	7.1593	1.68e-06	1.57282
1659	Positive	0.427	283.876	Unknown	[M+H]+	null	null	null	null	132.19	1.68e-06	1.53151
1660	Positive	12.51	435.233	no MS2: Grayanotoxin I_major	[M+Na]+	C22H36O7	Leucothol and grayanotoxane diterpenoids	NXCYBYJXCJWMRY-VGBBEZPXSA-N	CC(=O)OC1C2CCC3C(C)(O)C4CC(O)C(C)(C)C4(O)C(O)CC13CC2(C)O	11.106	1.69e-06	1.13661
1661	Positive	1.065	768.851	Unknown	[M+H]+	null	null	null	null	2.5483	1.69e-06	1.31361
1662	Positive	10.686	482.358	Unknown	[M+H]+	null	null	null	null	0.25798	1.71e-06	1.29388
1663	Positive	7.042	445.264	low score: Lovastatin hydroxy acid observed in lovastatin standard	[M+Na]+	C24H38O6	Medium-chain hydroxy acids and derivatives	QLJODMDSTUBWDW-BXMDZJJMSA-N	CCC(C)C(=O)OC1CC(C=C2C1C(C(C=C2)C)CCC(CC(CC(=O)O)O)O)C	5.6941	1.71e-06	1.23049
1664	Positive	0.807	171.112	no MS2: Levetiracetam	[M+H]+	C8H14N2O2	Alpha amino acids and derivatives	HPHUVLMMVZITSG-LURJTMIESA-N	O=C1N(CCC1)C(C(=N)O)CC	3.1331	1.72e-06	1.14557
1665	Positive	7.766	261.136	low score: Diaveridine	[M+H]+	C13H16N4O2	Dimethoxybenzenes	LDBTVAXGKYIFHO-UHFFFAOYSA-N	COC1=C(C=C(C=C1)CC2=CN=C(N=C2N)N)OC	0.24003	1.72e-06	1.46053
1666	Positive	10.243	598.44	Unknown	[M+H]+	null	null	null	null	0.14233	1.73e-06	1.52132
1667	Positive	6.618	592.427	low score: Unknown (carbon number 34); PlaSMA ID-2968	[M+H]+	C34H57NO7	Unknown	null	null	0.18417	1.73e-06	1.26356
1668	Positive	1.098	796.69	Unknown	[M+H]+	null	null	null	null	6.8605	1.73e-06	1.20973
1669	Positive	1.051	674.872	Unknown	[M+H]+	null	null	null	null	3.9302	1.74e-06	1.18508
1670	Positive	6.546	449.268	low score: Mappain	[M+2Na-H]+	C29H36O4	Stilbenes	GJZKDVGLDGLPMB-ZVBRSKEYSA-N	OC=1C=C(C=CC2=CC(O)=C(C(O)=C2)CC=C(C)C)C=C(C1O)CC=C(C)CCC=C(C)C	4.3613	1.79e-06	1.15121
1671	Positive	8.139	486.296	Unknown	[M+H]+	null	null	null	null	0.1126	1.79e-06	1.18111
1672	Negative	19.761	164.83	Unknown	[M-H]-	null	null	null	null	0.33148	1.79e-06	1.46668
1673	Positive	10.49	582.36	no MS2: NCGC00381175-01!3-hydroxy-2-[[3-[3-(3-hydroxy-6-methylheptanoyl)oxy-6-methylheptanoyl]oxy-8-methylnonanoyl]amino]propanoic acid [IIN-based: Match]	[M+Na]+	C29H53NO9	N-acyl-alpha amino acids	MWZPHNZNPKKSEI-UHFFFAOYSA-N	CC(C)CCCCC(CC(=O)NC(CO)C(O)=O)OC(=O)CC(CCC(C)C)OC(=O)CC(O)CCC(C)C	6.1621	1.8e-06	1.14811
1674	Positive	1.11	644.729	Unknown	[M+H]+	null	null	null	null	8.1325	1.82e-06	1.15176
1675	Positive	0.067	780.626	Unknown	[M+H]+	null	null	null	null	0.14947	1.82e-06	1.3759
1676	Positive	14.285	832.644	Unknown	[M+H]+	null	null	null	null	0.19644	1.82e-06	1.28599
1677	Positive	16.712	469.395	low score: 6a-Acetoxy-17(21)-hopene	[M+H]+	C32H52O2	Hopanoids	NLYCXKGVDFJIGS-OOJXIBOZSA-N	CC1(C)CCC[C@]2(C)[C@@]3([H])CC[C@]4([H])[C@@]5(C)CCC(C(C)C)=C5CC[C@](C)4[C@@](C)3C[C@H](OC(C)=O)C12	0.094259	1.83e-06	1.1845
1678	Positive	1.064	868.86	Unknown	[M+H]+	null	null	null	null	3.3404	1.86e-06	1.26575
1679	Positive	0.872	252.9	Unknown	[M+H]+	null	null	null	null	12.837	1.88e-06	1.44114
1680	Positive	1.037	714.933	Unknown	[M+H]+	null	null	null	null	4.796	1.88e-06	1.23245
1681	Positive	1.013	760.877	Unknown	[M+H]+	null	null	null	null	28.506	1.88e-06	1.59749
1682	Positive	1.031	772.917	Unknown	[M+H]+	null	null	null	null	4.4414	1.88e-06	1.18207
1683	Negative	7.818	441.217	low score: methyl 8-hydroxy-4,5,7,10,14,14-hexamethyl-6,17-dioxo-16-oxapentacyclo[13.2.2.0?,??.0?,??.0?,?]nonadeca-3,7-diene-9-carboxylate	[M-H]-	C26H34O6	Naphthopyrans	LISLGICORSJAKO-UHFFFAOYSA-N	O=C(OC)C12C(O)=C(C(=O)C2(C(=CC3C45C(=O)OC(CC4)C(C)(C)C5CCC31C)C)C)C	0.19477	1.88e-06	1.32183
1684	Positive	0.432	298.877	Unknown	[M+H]+	null	null	null	null	114.26	1.89e-06	1.2597
1685	Positive	1.169	544.744	Unknown	[M+H]+	null	null	null	null	5.3279	1.9e-06	1.29774
1686	Positive	8.522	551.352	Unknown	[M+H]+	null	null	null	null	6.5694	1.9e-06	1.21322
1687	Positive	1.053	744.859	Unknown	[M+H]+	null	null	null	null	4.8043	1.97e-06	1.04525
1688	Positive	0.447	224.148	low score: Camellimidazole D	[M+H]+	C10H17N5O	2-heteroaryl carboxamides	VTPXABIHFAGVJO-UHFFFAOYSA-N	CN1C2=C(N(CN(CN(C)C2=O)C)C)N=C1	0.25995	1.98e-06	1.26156
1689	Positive	1.027	582.897	Unknown	[M+H]+	null	null	null	null	4.9736	1.98e-06	1.14211
1690	Positive	1.078	850.71	Unknown	[M+H]+	null	null	null	null	7.6634	1.98e-06	1.09802
1691	Positive	6.958	301.169	low score: 1-[4,5-bis(hydroxymethyl)-3-methoxy-2-methylphenoxy]-3-methylbutane-2,3-diol	[M+H]+	C15H24O6	Benzyl alcohols	MAQMWSUGBCIGLJ-UHFFFAOYSA-N	OCC1=CC(OCC(O)C(O)(C)C)=C(C(OC)=C1CO)C	0.29784	1.99e-06	1.27489
1692	Positive	0.75	284.854	Unknown	[M+H]+	null	null	null	null	161.52	2.01e-06	1.57158
1693	Positive	6.228	289.148	low score: PHA-00568487	[M+H]+	C16H20N2O3	Benzo-1,4-dioxanes	LUVXHMJTVXZFPD-ZDUSSCGKSA-N	O=C(N[C@H]1CN2CCC1CC2)C1=CC2=C(OCCO2)C=C1	5.1232	2.01e-06	1.44822
1694	Positive	1.049	870.823	Unknown	[M+H]+	null	null	null	null	3.9619	2.01e-06	1.22125
1695	Positive	1.684	102.099	low score: CYCLOPENTANONE	[M+NH4]+	C5H8O	Cyclic ketones	BGTOWKSIORTVQH-UHFFFAOYSA-N	C1CCC(=O)C1	4.42	2.02e-06	1.23247
1696	Positive	0.448	122.964	Unknown	[M+H]+	null	null	null	null	374.92	2.02e-06	1.27483
1697	Positive	1.061	554.814	Unknown	[M+H]+	null	null	null	null	6.9629	2.02e-06	1.53808
1698	Positive	0.402	296.098	no MS2: Mebendazole	[M+H]+	C16H13N3O3	Benzophenones	OPXLLQIJSORQAM-UHFFFAOYSA-N	COC(=O)Nc1nc2ccc(cc2[nH]1)C(=O)c1ccccc1	12.921	2.02e-06	1.44919
1699	Positive	14.747	100.084	no MS2: 2-Piperidone; CE0; XUWHAWMETYGRKB-UHFFFAOYSA-N	[M+H]+	C5H9NO	Piperidinones	XUWHAWMETYGRKB-UHFFFAOYSA-N	C1CCN=C(C1)O	26.925	2.03e-06	1.6203
1700	Positive	10.755	290.669	Unknown	[M+H]+	null	null	null	null	8.8659	2.06e-06	1.34959
1701	Positive	8.144	277.129	low score: lysergol	[M+Na]+	C16H18N2O	Clavines and derivatives	BIXJFIJYBLJTMK-BONVTDFDSA-N	OCC1C=C2C=3C=CC=C4NC=C(C43)CC2N(C)C1	0.14796	2.06e-06	1.34952
1702	Positive	13.515	171.112	no MS2: Levetiracetam	[M+2Na]2+	C8H14N2O2	Alpha amino acids and derivatives	HPHUVLMMVZITSG-LURJTMIESA-N	O=C1N(CCC1)C(C(=N)O)CC	21.934	2.1e-06	1.55123
1703	Positive	7.639	163.086	low score: Methyl trans-cinnamic acid	[M+H]+	C10H10O2	Cinnamic acids	RURHILYUWQEGOS-VOTSOKGWSA-N	Cc1ccc(cc1)/C=C/C(=O)O	2.9629	2.1e-06	1.5517
1704	Positive	14.91	327.257	low score: Avocadyne Acetate	[M+H]+	C19H34O4	Long-chain fatty alcohols	JAKAZHIACKJNNB-UHFFFAOYSA-N	O=C(OCC(O)CC(O)CCCCCCCCCCCC#C)C	0.099549	2.1e-06	1.64006
1705	Positive	1.079	194.035	no MS2: Phenacylamine Hydrochloride	[M+Na]+	C8H10ClNO	Alkyl-phenylketones	CVXGFPPAIUELDV-UHFFFAOYSA-N	Cl.O=C(C=1C=CC=CC1)CN	3.4139	2.12e-06	1.26777
1706	Positive	7.799	446.287	Unknown	[M+H]+	null	null	null	null	4.1595	2.12e-06	1.34198
1707	Positive	1.74	100.083	N-Methyl-2-pyrrolidone	[M+H]+	C5H9NO	N-alkylpyrrolidines	SECXISVLQFMRJM-UHFFFAOYSA-N	CN1CCCC1=O	13.536	2.15e-06	1.66407
1708	Positive	12.595	424.297	low score: NCGC00380397-01_C25H39NO3_(7E)-3-Isobutyl-13-methoxy-4,5,8-trimethyl-3,3a,4,6a,9,10,11,12,13,14-decahydro-1H-cycloundeca[d]isoindole-1,15(2H)-dione	[M+Na]+	C25H39NO3	Isoindolones	BECNNJLLIXQSGY-UHFFFAOYSA-N	COC1CCCCC(=C\C2\C=C(C)/C(C)C3C(CC(C)C)NC(=O)C23C(=O)C1)\C	6.3928	2.17e-06	1.31024
1709	Positive	13.493	395.247	low score: "(R)-4-((8S,9S,10R,13R,14S,17R)-10,13-dimethyl-3-oxo-2,3,6,7,8,9,10,11,12,13,14,15,16,17-tetradecahydro-1H-cyclopenta[a]phenanthren-17-yl)pentanoic acid"	[M+Na]+	C24H36O3	Bile acids, alcohols and derivatives	WCFIGQHNBJXROP-IHMUCKAYSA-N	C[C@@H]([C@H]1CC[C@]2([H])[C@]1(C)CC[C@@]3([H])[C@@]2([H])CCC([C@]3(C)CC4)=CC4=O)CCC(O)=O	10.684	2.17e-06	1.24142
1710	Positive	1.034	966.856	Unknown	[M+H]+	null	null	null	null	6.5199	2.18e-06	1.41674
1711	Positive	0.745	267.851	Unknown	[M+H]+	null	null	null	null	69.806	2.19e-06	1.47793
1712	Positive	1.104	266.094	no MS2: NCGC00169277-02!3-(4-hydroxy-5-oxo-3-phenyl-2H-furan-2-yl)propanoic acid	[M+NH4]+	C13H12O5	Butenolides	PPZVSYXNLXFYAD-UHFFFAOYSA-N	OC(=O)CCC1OC(=O)C(O)=C1C2=CC=CC=C2	0.26679	2.19e-06	1.33122
1713	Positive	12.813	369.386	Unknown	[M+H]+	null	null	null	null	0.1031	2.2e-06	1.38241
1714	Positive	1.257	511.097	no MS2: CITICOLINE	[M+Na]+	C14H26N4O11P2	Pyrimidine ribonucleoside diphosphates	RZZPDXZPRHQOCG-OJAKKHQRSA-N	C[N+](C)(C)CCOP([O-])(=O)OP(O)(=O)OC[C@H]1O[C@H]([C@H](O)[C@@H]1O)N1C=CC(N)=NC1=O	10.81	2.23e-06	1.42831
1715	Positive	1.023	682.853	no MS2: phytic acid	[M+Na]+	C6H18O24P6	Inositol phosphates	IMQLKJBTEOYOSI-UHFFFAOYSA-N	O=P(O)(O)OC1C(OP(=O)(O)O)C(OP(=O)(O)O)C(OP(=O)(O)O)C(OP(=O)(O)O)C1OP(=O)(O)O	35.383	2.26e-06	1.55522
1716	Positive	1.039	606.829	Unknown	[M+H]+	null	null	null	null	21.067	2.27e-06	1.58287
1717	Positive	10.551	704.285	low score: (S)-2-(((S)-7-acetamido-1,2,3-trimethoxy-9-oxo-5,6,7,9-tetrahydrobenzo[a]heptalen-10-yl)amino)-N-(2-(3-hydroxy-2-oxoquinoxalin-1(2H)-yl)ethyl)-4-(methylthio)butanamide	[M+H]+	C36H41N5O8S	Methionine and derivatives	YSPKLVVMZUKLMR-IGKIAQTJSA-N	O=C1C=C2C(=CC=C1NC(C(=O)NCCN3C(=O)C(O)=NC=4C=CC=CC43)CCSC)C5=C(OC)C(OC)=C(OC)C=C5CCC2NC(=O)C	16.644	2.27e-06	1.5156
1718	Positive	16.393	531.447	Unknown	[M+H]+	null	null	null	null	0.14212	2.27e-06	1.36428
1719	Positive	0.717	279.185	low score: (6E)-2,6,10-trimethyldodeca-6,11-diene-2,3,10-triol_major	[M+Na]+	C15H28O3	Sesquiterpenoids	BGUYVWYUIXKRDO-XYOKQWHBSA-N	C=CC(C)(O)CCC=C(C)CCC(O)C(C)(C)O	0.24469	2.29e-06	1.25625
1720	Positive	0.367	295.188	low score: MMV021013	[M+H]+	C18H22N4	Pyridinylpyrimidines	TVBQRAPNJPDSJM-UHFFFAOYSA-N	N1=CC=CC=C1C2=NC(=CC(=NC3CCCCC3)N2)C4CC4	2.1924	2.32e-06	1.24018
1721	Positive	1.015	718.881	Unknown	[M+H]+	null	null	null	null	5.2237	2.32e-06	1.18995
1722	Positive	14.538	828.627	Unknown	[M+H]+	null	null	null	null	0.15534	2.33e-06	1.35277
1723	Negative	6.944	443.215	low score: Mitragynine	[M+HCOO]-	C23H30N2O4	Corynanthean-type alkaloids	LELBFTMXCIIKKX-UHFFFAOYNA-N	CCC1CN2CCC3=C(NC4=C3C(OC)=CC=C4)C2CC1C(=COC)C(=O)OC	0.06361	2.33e-06	1.23948
1724	Positive	1.081	652.762	Unknown	[M+H]+	null	null	null	null	7.8329	2.34e-06	1.4797
1725	Positive	14.841	760.666	Unknown	[M+H]+	null	null	null	null	0.097203	2.35e-06	1.30536
1726	Positive	1.051	730.867	Unknown	[M+H]+	null	null	null	null	3.6059	2.37e-06	1.08189
1727	Positive	7.761	343.326	Unknown	[M+H]+	null	null	null	null	0.18891	2.41e-06	1.27767
1728	Positive	0.614	180.926	Unknown	[M+H]+	null	null	null	null	5.8936	2.44e-06	1.38971
1729	Positive	12.424	374.287	low score: Lagochilin	[M+NH4]+	C20H36O5	Diterpenoids	XYPPDQHBNJURHU-RHFXQVJCSA-N	OCCC1(OC2(CC1)C(C)CCC3C(C)(CO)C(O)CCC32C)CO	0.13185	2.44e-06	1.45854
1730	Positive	9.882	522.394	Unknown	[M+H]+	null	null	null	null	0.16556	2.45e-06	1.17994
1731	Positive	1.035	574.866	Unknown	[M+H]+	null	null	null	null	6.116	2.49e-06	1.29209
1732	Positive	13.089	100.083	no MS2: 2-Piperidone; CE0; XUWHAWMETYGRKB-UHFFFAOYSA-N	[M+H]+	C5H9NO	Piperidinones	XUWHAWMETYGRKB-UHFFFAOYSA-N	C1CCN=C(C1)O	31.596	2.51e-06	1.64453
1733	Positive	7.324	560.376	low score: NCGC00381175-01!3-hydroxy-2-[[3-[3-(3-hydroxy-6-methylheptanoyl)oxy-6-methylheptanoyl]oxy-8-methylnonanoyl]amino]propanoic acid	[M+H]+	C29H53NO9	N-acyl-alpha amino acids	MWZPHNZNPKKSEI-UHFFFAOYSA-N	CC(C)CCCCC(CC(=O)NC(CO)C(O)=O)OC(=O)CC(CCC(C)C)OC(=O)CC(O)CCC(C)C	0.47971	2.57e-06	1.17554
1734	Positive	0.355	157.094	low score: Unknown (carbon number 8); PlaSMA ID-275	[M+H]+	C8H12O3	Unknown	null	null	9.4625	2.59e-06	1.48757
1735	Positive	1.064	885.866	Unknown	[M+H]+	null	null	null	null	3.4857	2.59e-06	1.33471
1736	Positive	0.572	102.099	low score: CYCLOPENTANONE	[M+NH4]+	C5H8O	Cyclic ketones	BGTOWKSIORTVQH-UHFFFAOYSA-N	C1CCC(=O)C1	3.1807	2.62e-06	1.35814
1737	Positive	15.02	689.539	Unknown	[M+H]+	null	null	null	null	0.15609	2.63e-06	1.51487
1738	Positive	9.29	301.242	low score: Roccellic acid	[M+H]+	C17H32O4	Long-chain fatty acids	CADNMISJDLVPCK-UHFFFAOYSA-N	O=C(O)C(CCCCCCCCCCCC)C(C)C(=O)O	0.034259	2.63e-06	1.36793
1739	Positive	0.427	216.93	Unknown	[M+H]+	null	null	null	null	10.599	2.65e-06	1.26728
1740	Positive	14.546	567.348	Unknown	[M+H]+	null	null	null	null	0.13968	2.65e-06	1.46813
1741	Positive	14.38	380.138	no MS2: NCGC00384901-01_C24H17N3O2_(7Z)-7-Benzylidene-6-methyl-6,7-dihydroquinazolino[3,2-a][1,4]benzodiazepine-5,13-dione	[M+H]+	C24H17N3O2	Pyrimidodiazepines	HXDZMNFJQNZXKW-QNGOZBTKSA-N	CN1C(=O)C2=C(C=CC=C2)N3C(=O)C4=C(C=CC=C4)/N=C3/C1=C/C5=CC=CC=C5	15.8	2.68e-06	1.27647
1742	Positive	0.454	123.102	4-Dimethylaminopyridine	[M+H]+	C7H10N2	Dialkylarylamines	VHYFNPMBLIVWCW-UHFFFAOYSA-N	CN(C)c1ccncc1	4.0798	2.69e-06	1.56084
1743	Positive	0.521	148.942	Unknown	[M+H]+	null	null	null	null	39.89	2.69e-06	1.46166
1744	Positive	10.919	482.358	Unknown	[M+H]+	null	null	null	null	0.34497	2.7e-06	1.13792
1745	Positive	1.11	336.184	no MS2: MMV688703	[M+Na]+	C21H22FN3	Phenylpyrroles	RBWNFHXBUDPAIO-UHFFFAOYSA-N	FC=1C=CC(=CC1)C=2NC(=CC2C=3C=CN=CC3)C4CCN(C)CC4	0.26959	2.7e-06	1.05024
1746	Positive	0.426	224.879	Unknown	[M+H]+	null	null	null	null	99.346	2.73e-06	1.48562
1747	Positive	1.031	998.851	no MS2: (NAG)(DAM)-AelA;(G-G)-(NAG)(NAM)-AelAG	[M+2H]2+	C76H121N15O43S2	Polypeptides	UBACIIOEFBCVFB-UHFFFAOYSA-N	CC(=O)NC1C(OC2C(COC(C)=O)OC(OC3C(CO)OC(OC4C(CO)OC(O)C(NC(C)=O)C4OC(C)C(=O)NC(C)C(=O)NC(CCC(=O)NC(CSCC(N)C(=O)O)C(=O)NC(C)C(=O)NCC(=O)O)C(=O)O)C(NC(C)=O)C3O)C(NC(C)=O)C2OC(C)C(=O)NC(C)C(=O)NC(CCC(=O)NC(CSCC(N)C(=O)O)C(=O)NC(C)C(=O)O)C(=O)O)OC(CO)C(O)C1O	8.2027	2.74e-06	1.07789
1748	Positive	1.264	435.088	low score: Quercetin 3-O-beta-D-xylopyranoside	[M+H]+	C20H18O11	Flavonoid-3-O-glycosides	PZZRDJXEMZMZFD-BWYUNELBSA-N	O=C1C(OC2OCC(O)C(O)C2O)=C(OC=3C=C(O)C=C(O)C13)C=4C=CC(O)=C(O)C4	622.22	2.78e-06	1.57759
1749	Positive	1.027	572.872	Unknown	[M+H]+	null	null	null	null	9.3237	2.78e-06	1.47675
1750	Positive	7.84	413.228	no MS2: DIGOXIGENIN	[M+Na]+	C23H34O5	Cardenolides and derivatives	SHIBSTMRCDJXLN-KCZCNTNESA-N	O=C1OCC(=C1)C2CCC3(O)C4CCC5CC(O)CCC5(C)C4CC(O)C23C	4.9225	2.78e-06	1.13057
1751	Positive	10.579	401.241	low score: Pinoxaden	[M+ACN+H]+	C23H32N2O4	Phenylpyrazoles	MGOHCFMYLBAPRN-UHFFFAOYSA-N	CC(C)(C)C(=O)O/C2=C(/C(=O)N1CCOCCN12)c3c(CC)cc(C)cc3CC	0.2158	2.79e-06	1.17852
1752	Positive	8.546	532.379	Unknown	[M+H]+	null	null	null	null	0.25239	2.81e-06	1.11518
1753	Positive	1.076	638.833	Unknown	[M+H]+	null	null	null	null	4.474	2.82e-06	1.08619
1754	Positive	7.808	515.312	low score: 2-hydroxy-3-{[3,4,5-trihydroxy-6-(hydroxymethyl)oxan-2-yl]oxy}propyl (9Z,12Z,15Z)-octadeca-9,12,15-trienoate	[M+H]+	C27H46O9	Glycosylmonoacylglycerols	HUSISCNTLUEZCN-PDBXOOCHSA-N	O=C(OCC(O)COC1OC(CO)C(O)C(O)C1O)CCCCCCCC=CCC=CCC=CCC	18.955	2.88e-06	1.06677
1755	Positive	10.755	613.302	no MS2: (2R,3R,4S,6R)-6-((10-formyl-5,14-dihydroxy-13-methyl-17-(5-oxo-2,5-dihydrofuran-3-yl)hexadecahydro-1H-cyclopenta[a]phenanthren-3-yl)oxy)-4-methoxy-2-methyltetrahydro-2H-pyran-3-yl acetate	[M+Na]+	C32H46O10	Cardenolide glycosides and derivatives	FPIVCKLVSVCJHW-UHFFFAOYSA-N	O=CC12CCC(OC3OC(C)C(OC(=O)C)C(OC)C3)CC2(O)CCC4C1CCC5(C)C(C6=CC(=O)OC6)CCC45O	13.384	2.9e-06	1.26404
1756	Positive	1.024	565.013	Unknown	[M+H]+	null	null	null	null	4.0031	2.92e-06	1.36071
1757	Positive	0.756	270.073	Unknown	[M+H]+	null	null	null	null	17.457	2.97e-06	1.42949
1758	Positive	14.046	100.082	no MS2: 2-Piperidone; CE0; XUWHAWMETYGRKB-UHFFFAOYSA-N	[M+H]+	C5H9NO	Piperidinones	XUWHAWMETYGRKB-UHFFFAOYSA-N	C1CCN=C(C1)O	34.975	3e-06	1.62454
1759	Positive	9.209	590.269	no MS2: (NAG)(anNAM)-AqOG[3-NH2-SATA]	[M+2H]2+	C47H78N12O23	Polypeptides	CGGXYVJDGPQESG-UHFFFAOYSA-N	CC(=O)NC1C(OC2C3COC(O3)C(NC(C)=O)C2OC(C)C(=O)NC(C)C(=O)NC(CCC(=O)NC(CCCNC(=O)C(CO)NC(=O)C(C)NC(=O)C(NC(=O)C(C)N)C(C)O)C(=O)NCC(=O)O)C(N)=O)OC(CO)C(O)C1O	13.128	3e-06	1.39735
1760	Positive	9.534	597.344	Unknown	[M+H]+	null	null	null	null	8.0511	3e-06	1.30521
1761	Positive	12.664	313.296	Unknown	[M+H]+	null	null	null	null	72.424	3.02e-06	1.73717
1762	Positive	1.041	564.84	Unknown	[M+H]+	null	null	null	null	11.181	3.04e-06	1.57662
1763	Positive	0.731	369.085	low score: ethyl 3-(2,3-dihydrobenzo[b][1,4]dioxin-6-yl)-7-hydroxy-4-oxo-4H-chromene-2-carboxylate	[M+H]+	C20H16O7	Isoflavones	NTNSKOKPJWYQGX-UHFFFAOYSA-N	O=C(OCC)C=1OC2=CC(O)=CC=C2C(=O)C1C=3C=CC=4OCCOC4C3	27.401	3.05e-06	1.3294
1764	Negative	1.283	172.986	low score: 4-Hydroxybenzenesulfonic acid	[M-H]-	C6H6O4S	Benzenesulfonic acids and derivatives	FEPBITJSIHRMRT-UHFFFAOYSA-N	c1cc(ccc1O)S(=O)(=O)O	0.25448	3.05e-06	1.41736
1765	Positive	16.069	755.623	low score: (2E,6E)-3,7,11,15,19,23,27,31,35-nonamethylhexatriaconta-2,6,34-triene-1,10,11,15,19,23,27,31-octol	[M+H]+	C45H86O8	Polyprenols	MFQDKOXWQXOOAO-YAHSWYSTSA-N	OCC=C(C)CCC=C(C)CCC(O)C(O)(C)CCCC(O)(C)CCCC(O)(C)CCCC(O)(C)CCCC(O)(C)CCCC(O)(C)CCC=C(C)C	0.045263	3.06e-06	1.42328
1766	Positive	1.053	740.899	Unknown	[M+H]+	null	null	null	null	3.3775	3.09e-06	1.12464
1767	Negative	12.557	279.22	Unknown	[M-H]-	null	null	null	null	2.5451	3.09e-06	1.23808
1768	Positive	0.462	174.969	Unknown	[M+H]+	null	null	null	null	64.606	3.1e-06	1.5873
1769	Negative	14.291	393.259	Unknown	[M-H]-	null	null	null	null	2.2029	3.12e-06	1.30502
1770	Positive	9.287	402.427	Unknown	[M+H]+	null	null	null	null	28.345	3.19e-06	1.33084
1771	Positive	11.674	393.27	Unknown	[M+H]+	null	null	null	null	4.8904	3.22e-06	1.09428
1772	Positive	9.769	301.164	low score: 1-[4,5-bis(hydroxymethyl)-3-methoxy-2-methylphenoxy]-3-methylbutane-2,3-diol	[M+H]+	C15H24O6	Benzyl alcohols	MAQMWSUGBCIGLJ-UHFFFAOYSA-N	OCC1=CC(OCC(O)C(O)(C)C)=C(C(OC)=C1CO)C	0.37031	3.23e-06	1.22497
1773	Positive	1.096	974.663	Unknown	[M+H]+	null	null	null	null	4.8802	3.23e-06	1.15233
1774	Positive	1.065	828.779	Unknown	[M+H]+	null	null	null	null	5.1029	3.25e-06	1.12502
1775	Positive	7.801	453.197	(1R,5S)-3-(1-oxo-2-(pyridin-4-ylmethyl)-1,2-dihydroisoquinoline-4-carbonyl)-3,4,5,6-tetrahydro-1H-1,5-methanopyrido[1,2-a][1,5]diazocin-8(2H)-one	[M+H]+	C27H24N4O3	Cytisine and derivatives	HRIXOCFMOJEHEU-UXHICEINSA-N	O=C1C=CC=C2N1CC3CN(C(=O)C4=CN(C(=O)C=5C=CC=CC54)CC=6C=CN=CC6)CC2C3	11.547	3.27e-06	1.14681
1776	Positive	1.079	806.725	no MS2: (NAG)(NAM)-AqOA[3-NH2-SATA];(G-G)-(NAG)(NAM)-AqKA[3-NH2-SATA]	[M+3H]3+	C97H164N24O47	Polypeptides	ZNKUZXXSACLIST-UHFFFAOYSA-N	CC(=O)NC1C(OC2C(CO)OC(OC3C(CO)OC(OC4C(CO)OC(O)C(NC(C)=O)C4OC(C)C(=O)NC(C)C(=O)NC(CCC(=O)NC(CCCCNC(=O)C(CO)NC(=O)C(C)NC(=O)C(NC(=O)C(C)N)C(C)O)C(=O)NC(C)C(=O)O)C(N)=O)C(NC(C)=O)C3O)C(NC(C)=O)C2OC(C)C(=O)NC(C)C(=O)NC(CCC(=O)NC(CCCNC(=O)C(CO)NC(=O)C(C)NC(=O)C(NC(=O)C(C)N)C(C)O)C(=O)NC(C)C(=O)O)C(N)=O)OC(CO)C(O)C1O	5.7053	3.27e-06	1.1391
1777	Positive	1.039	888.807	no MS2: Triacylglycerol 17:1-18:1-18:1	[M+NH4]+	C56H102O6	Triacylglycerols	URECVIHFNYVHHN-AGPHHGIASA-N	C(CC)CCCCCCCCCC=CCCC(OCC(COC(CCC=CCCCCCCCCCCCCC)=O)OC(CCC=CCCCCCCCCCCCCC)=O)=O	4.363	3.27e-06	1.22047
1778	Positive	8.553	609.274	low score: Reserpine	[M+H]+	C33H40N2O9	Yohimbine alkaloids	QEVHRUUCFGRFIF-UHFFFAOYSA-N	c(C6([H])[H])(c12)c(C(N(C6([H])[H])5)(C(C([H])(C([H])3C(=O)OC([H])([H])[H])C([H])(C5([H])[H])C(C(OC(=O)c(c4[H])c(c(OC([H])([H])[H])c(c(OC([H])([H])[H])4)OC([H])([H])[H])[H])([H])C3(OC([H])([H])[H])[H])([H])[H])([H])[H])[H])n(c1c([H])c(c(c([H])2)[H])OC([H])([H])[H])[H]	18.028	3.28e-06	1.53749
1779	Positive	11.971	523.295	low score: 5,15-Diacetyl-3-benzoyllathyrol	[M+H]+	C31H38O7	Diterpenoids	JPYYWXPAHJBKJX-PTKUAVCHSA-N	O=C(OC1C(C)CC2(OC(=O)C)C(=O)C(=CC3C(CCC(=C)C(OC(=O)C)C12)C3(C)C)C)C=4C=CC=CC4	0.078128	3.33e-06	1.33096
1780	Positive	1.023	558.895	Unknown	[M+H]+	null	null	null	null	13.727	3.34e-06	1.59199
1781	Positive	1.064	894.845	Unknown	[M+H]+	null	null	null	null	3.1915	3.34e-06	1.15988
1782	Negative	11.221	684.369	Unknown	[M-H]-	null	null	null	null	2.3429	3.36e-06	1.3166
1783	Positive	13.386	100.084	no MS2: 2-Piperidone; CE0; XUWHAWMETYGRKB-UHFFFAOYSA-N	[M+H]+	C5H9NO	Piperidinones	XUWHAWMETYGRKB-UHFFFAOYSA-N	C1CCN=C(C1)O	33.845	3.43e-06	1.63664
1784	Positive	1.079	598.797	Unknown	[M+H]+	null	null	null	null	4.3728	3.44e-06	1.46592
1785	Positive	1.145	205.072	no MS2: Harmane	[M+Na]+	C12H10N2	Harmala alkaloids	PSFDQSOCUJVVGF-UHFFFAOYSA-N	N=1C=CC=2C=3C=CC=CC3NC2C1C	2.4403	3.46e-06	1.38655
1786	Positive	14.377	100.083	no MS2: 2-Piperidone; CE0; XUWHAWMETYGRKB-UHFFFAOYSA-N	[M+H]+	C5H9NO	Piperidinones	XUWHAWMETYGRKB-UHFFFAOYSA-N	C1CCN=C(C1)O	30.523	3.48e-06	1.61264
1787	Positive	9.439	592.272	no MS2: NCGC00347608-02_C30H38O11_7,11-Methano-2H,4H-oxireno[1,8]cycloocta[1,2-f][2]benzopyran-8-acetic acid, 4-(3-furanyl)dodecahydro-alpha,11-dihydroxy-4a,7,9,9-tetramethyl-2,13-dioxo-10-(1-oxopropoxy)-, methyl ester, (alphaR,4R,4aR,7S,8S,10S,11S,11aR,12aS)-	[M+NH4]+	C30H38O11	Limonoids	FZBGZDZLYSLJFE-MVAMGWTESA-N	CCC(=O)O[C@H]1C(C)(C)[C@H]([C@@H](O)C(=O)OC)[C@@]2(C)C3CC[C@]4(C)C(CC(=O)O[C@H]4C5=COC=C5)[C@]36O[C@@H]6[C@]1(O)C2=O	8.8082	3.48e-06	1.56549
1788	Positive	14.485	450.41	Unknown	[M+H]+	null	null	null	null	0.012898	3.52e-06	1.473
1789	Positive	1.065	943.823	Unknown	[M+H]+	null	null	null	null	6.2119	3.57e-06	1.32415
1790	Positive	9.084	239.181	Unknown	[M+H]+	null	null	null	null	0.37148	3.59e-06	1.15192
1791	Positive	8.546	596.305	low score: Chymostatinol A	[M+H]+	C30H41N7O6	Peptides	KUKQXNQRXXTUEM-UHFFFAOYSA-N	N=C(NCC1)NC1C(NC(NC(CC2=CC=CC=C2)C(O)=O)=O)C(NC(C(C)C)C(NC(CO)CC3=CC=CC=C3)=O)=O	9.7612	3.61e-06	1.47616
1792	Positive	1.265	401.132	no MS2: 4'-Demethylepipodophyllotoxin	[M+H]+	C21H20O8	Podophyllotoxins	YVCVYCSAAZQOJI-JHQYFNNDSA-N	O=C1OCC2C(O)C3=CC=4OCOC4C=C3C(C5=CC(OC)=C(O)C(OC)=C5)C12	21.475	3.61e-06	1.22166
1793	Positive	1.192	844.651	Unknown	[M+H]+	null	null	null	null	11.738	3.63e-06	1.34474
1794	Positive	1.579	422.85	Unknown	[M+H]+	null	null	null	null	10.929	3.64e-06	1.33752
1795	Positive	1.114	710.728	Unknown	[M+H]+	null	null	null	null	4.2867	3.67e-06	1.18413
1796	Positive	1.088	782.758	Unknown	[M+H]+	null	null	null	null	4.3873	3.67e-06	1.07632
1797	Positive	1.047	496.845	Unknown	[M+H]+	null	null	null	null	6.2656	3.75e-06	1.54862
1798	Positive	1.107	632.794	no MS2: (NAG)(anNAM)-AqOAA[3-NH2-SATA]	[M+2H]2+	C51H85N13O24	Polypeptides	VZKMIUCIGZXYSX-UHFFFAOYSA-N	CC(=O)NC1C(OC2C3COC(O3)C(NC(C)=O)C2OC(C)C(=O)NC(C)C(=O)NC(CCC(=O)NC(CCCNC(=O)C(CO)NC(=O)C(C)NC(=O)C(NC(=O)C(C)N)C(C)O)C(=O)NC(C)C(=O)NC(C)C(=O)O)C(N)=O)OC(CO)C(O)C1O	4.5106	3.79e-06	1.10479
1799	Positive	1.164	169.998	Unknown	[M+H]+	null	null	null	null	2.6571	3.8e-06	1.20572
1800	Positive	8.449	500.313	low score: Taurodeoxycholate	[M+H]+	C26H45NO6S	Taurinated bile acids and derivatives	AWDRATDZQPNJFN-VAYUFCLWSA-N	C[C@H](CC/C(=N/CCS(=O)(=O)O)/O)[C@H]1CC[C@@H]2[C@@]1([C@H](C[C@H]3[C@H]2CC[C@H]4[C@@]3(CC[C@H](C4)O)C)O)C	6.7008	3.8e-06	1.27751
1801	Positive	1.166	484.786	Unknown	[M+H]+	null	null	null	null	3.7362	3.8e-06	1.15434
1802	Positive	10.574	360.213	low score: Unknown (carbon number 16); PlaSMA ID-2012	[M+NH4]+	C16H29N3O6	Unknown	null	null	0.1643	3.84e-06	1.48213
1803	Positive	1.059	764.869	Unknown	[M+H]+	null	null	null	null	2.6286	3.85e-06	1.16528
1804	Positive	17.31	367.35	low score: Nervonic Acid	[M+H]+	C24H46O2	Very long-chain fatty acids	GWHCXVQVJPWHRF-KTKRTIGZSA-N	O=C(O)CCCCCCCCCCCCCC=CCCCCCCCC	0.13806	3.9e-06	1.42545
1805	Positive	11.477	808.623	Unknown	[M+H]+	null	null	null	null	6.6957	3.91e-06	1.37211
1806	Positive	1.073	930.736	Unknown	[M+H]+	null	null	null	null	4.9022	3.92e-06	1.21403
1807	Negative	0.393	155.859	Unknown	[M-H]-	null	null	null	null	0.42304	4e-06	1.3597
1808	Positive	14.353	123.1	no MS2: 4-(Dimethylamino)pyridine	[M+H]+	C7H10N2	Dialkylarylamines	VHYFNPMBLIVWCW-UHFFFAOYSA-N	N=1C=CC(=CC1)N(C)C	3.4562	4.02e-06	1.5458
1809	Negative	11.205	842.491	Unknown	[M-H]-	null	null	null	null	2.0926	4.02e-06	1.26215
1810	Positive	0.554	131.939	Unknown	[M+H]+	null	null	null	null	908.9	4.04e-06	1.60008
1811	Positive	8.829	372.345	low score: NCGC00380102-01!3-hexadecyl-4-methoxy-5-methyloxolan-2-one [IIN-based: Match]	[M+NH4]+	C22H42O3	Gamma butyrolactones	DJNFXUFERDZHCD-UHFFFAOYSA-N	CCCCCCCCCCCCCCCCC1C(OC)C(C)OC1=O	0.19424	4.04e-06	1.26731
1812	Positive	1.21	319.157	no MS2: Zearalenone	[M+H]+	C18H22O5	Zearalenones	MBMQEIFVQACCCH-QBODLPLBSA-N	CC1CCCC(=O)CCCC=CC2=C(C(=CC(=C2)O)O)C(=O)O1	0.43264	4.05e-06	1.20182
1813	Positive	0.417	453.814	Unknown	[M+H]+	null	null	null	null	7.7089	4.07e-06	1.09757
1814	Positive	14.421	782.666	Unknown	[M+H]+	null	null	null	null	0.17466	4.07e-06	1.35502
1815	Positive	1.061	426.863	Unknown	[M+H]+	null	null	null	null	8.4674	4.1e-06	1.53272
1816	Positive	10.515	640.291	Unknown	[M+H]+	null	null	null	null	8.0492	4.16e-06	1.29689
1817	Positive	1.031	874.894	Unknown	[M+H]+	null	null	null	null	6.1381	4.16e-06	1.11012
1818	Positive	0.603	243.845	Unknown	[M+H]+	null	null	null	null	116.6	4.2e-06	1.53868
1819	Positive	1.077	834.849	Unknown	[M+H]+	null	null	null	null	3.2986	4.21e-06	1.11222
1820	Positive	8.957	460.313	Unknown	[M+H]+	null	null	null	null	0.20128	4.22e-06	1.31906
1821	Positive	2.073	279.183	no MS2: NCGC00385848-01_C19H24N2O_(3alpha,14alpha,16alpha)-14,15-Dihydroeburnamenin-14-ol	[M-H2O+H]+	C19H24N2O	Eburnan-type alkaloids	HONLKDDLTAZVQV-UHFFFAOYSA-N	CCC12CCCN3CCC4=C(C13)[N](C(O)C2)C5=CC=CC=C45	0.23677	4.22e-06	1.20954
1822	Positive	14.723	235.223	no MS2: (1R,2R,5R,7S)-2-cyclopentyl-5,7-dimethyl-1,3-diazaadamantane	[M+H]+	C15H26N2	Diazinanes	ZKHXDVJFFSPXFK-QKDCVEJESA-N	N12CC3(C)CN(CC(C)(C1)C3)C2C4CCCC4	11.075	4.24e-06	1.63661
1823	Positive	0.428	204.904	Unknown	[M+H]+	null	null	null	null	11.645	4.24e-06	1.45215
1824	Positive	12.127	448.321	Unknown	[M+H]+	null	null	null	null	0.16734	4.24e-06	1.32883
1825	Positive	7.859	293.128	low score: 1-allyl-2-hydroxy-7,8,9,10-tetrahydroazepino[2,1-b]quinazolin-12(6H)-one	[M+Na]+	C16H18N2O2	Quinazolines	NYOGAOMLDBVPKF-UHFFFAOYSA-N	O=C1C2=C(N=C3N1CCCCC3)C=CC(O)=C2CC=C	7.4518	4.24e-06	1.19925
1826	Positive	14.38	461.264	no MS2: desferrioxamine H	[M+H]+	C20H36N4O8	N-acyl amines	VJQANBSDAGCDJE-UHFFFAOYSA-N	OC(CCC(NCCCCCN(C(CCC(NCCCCCN(C(C)=O)O)=O)=O)O)=O)=O	13.216	4.24e-06	1.20901
1827	Positive	1.04	636.925	Unknown	[M+H]+	null	null	null	null	5.1759	4.26e-06	1.0907
1828	Positive	8.369	520.377	Unknown	[M+H]+	null	null	null	null	279.07	4.3e-06	1.59589
1829	Positive	9.109	279.185	low score: (6E)-2,6,10-trimethyldodeca-6,11-diene-2,3,10-triol_major	[M+Na]+	C15H28O3	Sesquiterpenoids	BGUYVWYUIXKRDO-XYOKQWHBSA-N	C=CC(C)(O)CCC=C(C)CCC(O)C(C)(C)O	0.26781	4.32e-06	1.27079
1830	Positive	12.879	784.652	Unknown	[M+H]+	null	null	null	null	0.19861	4.32e-06	1.22054
1831	Positive	14.179	100.084	no MS2: 2-Piperidone; CE0; XUWHAWMETYGRKB-UHFFFAOYSA-N	[M+H]+	C5H9NO	Piperidinones	XUWHAWMETYGRKB-UHFFFAOYSA-N	C1CCN=C(C1)O	31.655	4.34e-06	1.64254
1832	Positive	6.066	279.179	no MS2: Ethinyl estradiol	[M-H2O+H]+	C20H24O2	Estrogens and derivatives	BFPYWIDHMRZLRN-UHFFFAOYSA-N	Oc(c4)cc(C3)c(c4)C(C2)C(C3)C(C1)C(C)(C2)C(O)(C#C)C1	0.29451	4.43e-06	1.26071
1833	Positive	12.617	207.188	Unknown	[M+H]+	null	null	null	null	4.3897	4.52e-06	1.44669
1834	Positive	1.09	808.72	Unknown	[M+H]+	null	null	null	null	5.7147	4.52e-06	1.16438
1835	Positive	7.587	426.355	low score: Oleoyl-L-Carnitine	[M+H]+	C25H47NO4	Acyl carnitines	IPOLTUVFXFHAHI-WHIOSMTNSA-N	CCCCCCCC/C=C\CCCCCCCC(=O)O[C@H](CC(=O)[O-])C[N+](C)(C)C	0.090789	4.56e-06	1.31011
1836	Positive	1.076	914.697	Unknown	[M+H]+	null	null	null	null	7.1622	4.59e-06	1.14372
1837	Positive	10.727	325.237	no MS2: Lichesterinic acid	[M+Na]+	C19H32O4	Butenolides	SLQVVNFTCYVCPB-INIZCTEOSA-N	CCCCCCCCCCCCC[C@H]1C(=C(C(=O)O1)C)C(=O)O	0.20102	4.6e-06	1.37383
1838	Positive	0.376	313.218	low score: Guggulsterone E&Z	[M+H]+	C21H28O2	Androgens and derivatives	WDXRGPWQVHZTQJ-AYSLTRBKSA-N	O=C1C=C2CCC3C4CC(=O)C(=CC)C4(C)CCC3C2(C)CC1	9.1114	4.64e-06	1.44067
1839	Negative	10.753	433.211	low score: 3-Deoxycaryoptinol	[M-H]-	C24H34O7	Furofurans	CNIWQELMLPUFOS-NVSXQWMQSA-N	O=C(OCC12C(OC(=O)C)CC(C)C(C)(C3OC4OC=CC4C3)C2CCCC51OC5)C	0.30018	4.66e-06	1.27566
1840	Positive	1.027	642.863	Unknown	[M+H]+	null	null	null	null	5.2695	4.81e-06	1.06661
1841	Positive	17.536	447.379	Unknown	[M+H]+	null	null	null	null	0.45049	4.82e-06	1.1235
1842	Positive	12.922	399.354	Unknown	[M+H]+	null	null	null	null	6.6389	4.84e-06	1.17341
1843	Negative	1.523	633.093	Unknown	[M-H]-	null	null	null	null	0.25727	4.84e-06	1.08354
1844	Positive	1.068	680.769	Unknown	[M+H]+	null	null	null	null	8.514	4.86e-06	1.13714
1845	Positive	7.8	528.332	low score: "2-((4R)-4-((3R,5S,7S,9S,10S,13R,14S,17R)-3,7-dihydroxy-10,13-dimethylhexadecahydro-1H-cyclopenta[a]phenanthren-17-yl)-2,2-dimethylpentanamido)ethane-1-sulfonic acid"	[M+H]+	C28H49NO6S	Taurinated bile acids and derivatives	UXAHTIGXQXJADE-VHDFTFQCSA-N	[H][C@@]12[C@@H](O)C[C@]3([H])C[C@H](O)CC[C@]3(C)[C@H]1CC[C@@]4(C)[C@H]2CC[C@@H]4[C@@H](CCC(NCC(C)(C)S(=O)(O)=O)=O)C	17.373	4.86e-06	1.09868
1846	Negative	1.203	178.042	no MS2: Isoxanthopterin	[M-H]-	C6H5N5O2	Pterins and derivatives	GLKCOBIIZKYKFN-UHFFFAOYSA-N	N=C1N=C(O)C=2N=CC(O)=NC2N1	0.24441	4.91e-06	1.24745
1847	Positive	8.671	454.325	low score: Peimine	[M+Na]+	C27H45NO3	Cerveratrum-type alkaloids	IUKLSMSEHKDIIP-BZMYINFQSA-N	OC1CCC2(C)C(C1)C(O)CC3C4CCC5C(CN6CC(C)CCC6C5(O)C)C4CC32	21.098	4.93e-06	1.40619
1848	Positive	7.988	225.212	low score: N~1~,N~4~-bis(3-aminopropyl)-1,4-butanediamine	[M+Na]+	C10H26N4	Dialkylamines	PFNFFQXMRSDOHW-UHFFFAOYSA-N	NCCCNCCCCNCCCN	33.113	4.94e-06	1.62693
1849	Positive	0.062	223.078	no MS2: 2-methylanthra-9,10-quinone	[M+H]+	C15H10O2	Anthraquinones	NJWGQARXZDRHCD-UHFFFAOYSA-N	O=C1C=2C=CC=CC2C(=O)C3=CC(=CC=C13)C	15.781	4.97e-06	1.59696
1850	Positive	8.989	498.97	Unknown	[M+H]+	null	null	null	null	12.296	4.98e-06	1.40117
1851	Positive	1.148	196.085	no MS2: GLUCOSAMINATE	[M+H]+	C6H13NO6	D-alpha-amino acids	UFYKDFXCZBTLOO-TXICZTDVSA-N	C([C@H]([C@H]([C@@H]([C@H](C(=O)O)N)O)O)O)O	0.36131	5e-06	1.17062
1852	Positive	1.108	314.204	no MS2: Heliotrine	[M+H]+	C16H27NO5	Alkaloids and derivatives	LMFKRLGHEKVMNT-UJDVCPFMSA-N	CC(C)C(C(C)OC)(C(=O)OCC1=CCN2C1C(CC2)O)O	0.22836	5e-06	1.05268
1853	Positive	1.054	676.871	Unknown	[M+H]+	null	null	null	null	2.5225	5.03e-06	1.32314
1854	Negative	1.58	649.064	low score: Porphyrilic acid	[M+K-2H]-	C16H10O7	Dibenzofurans	QZYZPZAPRHESDA-UHFFFAOYSA-N	Oc1cc2c(c3c1C(=O)OC3)c1c(O)cc(C)c(C(=O)O)c1o2	0.30777	5.04e-06	1.17609
1855	Positive	1.059	662.879	Unknown	[M+H]+	null	null	null	null	2.5442	5.09e-06	1.2652
1856	Positive	0.691	223.08	no MS2: 2-methylanthra-9,10-quinone	[M+H]+	C15H10O2	Anthraquinones	NJWGQARXZDRHCD-UHFFFAOYSA-N	O=C1C=2C=CC=CC2C(=O)C3=CC(=CC=C13)C	4.2267	5.1e-06	1.54081
1857	Positive	0.746	205.104	low score: Tryptophan	[M+H]+	C11H12N2O2	Indolyl carboxylic acids and derivatives	QIVBCDIJIAJPQS-UHFFFAOYSA-N	C1=CC=C2C(=C1)C(=CN2)CC(C(=O)O)N	0.30082	5.12e-06	1.18948
1858	Positive	0.693	274.825	Unknown	[M+H]+	null	null	null	null	164.78	5.12e-06	1.60355
1859	Positive	0.731	304.819	Unknown	[M+H]+	null	null	null	null	257.27	5.18e-06	1.57186
1860	Positive	11.652	377.293	low score: "(4R)-4-((3R,5S,9S,10S,13R,14S,17R)-3-hydroxy-10,13-dimethylhexadecahydro-1H-cyclopenta[a]phenanthren-17-yl)pentanoic acid"	[M+H]+	C24H40O3	Monohydroxy bile acids, alcohols and derivatives	SMEROWZSTRWXGI-NWFSOSCSSA-N	C[C@@]12[C@](CC[C@]3([H])[C@@H]2CC[C@@]4(C)[C@H]3CC[C@@H]4[C@@H](CCC(O)=O)C)([H])C[C@H](O)CC1	67.024	5.21e-06	1.52482
1861	Negative	12.337	303.22	low score: Aleuretic Acid	[M-H]-	C16H32O5	Long-chain fatty acids	MEHUJCGAYMDLEL-LSDHHAIUSA-N	O=C(O)CCCCCCCC(O)C(O)CCCCCCO	2.4353	5.25e-06	1.17964
1862	Positive	1.114	702.695	Unknown	[M+H]+	null	null	null	null	6.41	5.33e-06	1.24702
1863	Positive	1.016	770.906	Unknown	[M+H]+	null	null	null	null	10.13	5.4e-06	1.23043
1864	Positive	1.065	725.896	Unknown	[M+H]+	null	null	null	null	3.6459	5.42e-06	1.21052
1865	Positive	6.187	770.915	Unknown	[M+H]+	null	null	null	null	0.24153	5.46e-06	1.13584
1866	Positive	0.633	131.94	Unknown	[M+H]+	null	null	null	null	876.23	5.49e-06	1.57729
1867	Positive	8.378	286.329	Unknown	[M+H]+	null	null	null	null	30.121	5.56e-06	1.50418
1868	Positive	13.952	285.298	low score: N-[3-(Dimethylamino)propyl]dodecanamide	[M+H]+	C17H36N2O	N-acyl amines	TWMFGCHRALXDAR-UHFFFAOYSA-N	CCCCCCCCCCCC(=O)NCCCN(C)C	3.1502	5.58e-06	1.15676
1869	Positive	1.065	801.849	Unknown	[M+H]+	null	null	null	null	5.3403	5.61e-06	1.19307
1870	Positive	9.025	570.387	low score: "(4R)-4-((3R,5S,7R,9S,10S,13R,14S,17R)-3,7-dihydroxy-10,13-dimethylhexadecahydro-1H-cyclopenta[a]phenanthren-17-yl)-N-methyl-N-((2S,3R,4R,5R)-2,3,4,5,6-pentahydroxyhexyl)pentanamide"	[M+H]+	C31H55NO8	Dihydroxy bile acids, alcohols and derivatives	KUXSAFRZQPYINU-SGWAQUIASA-N	C[C@H](CCC(N(C)C[C@H](O)[C@@H](O)[C@@H]([C@@H](CO)O)O)=O)[C@H]1CC[C@H]2[C@]3([H])[C@H](O)C[C@@H]4C[C@H](O)CC[C@]4(C)[C@H]3CC[C@@]21C	0.22245	5.62e-06	1.12518
1871	Positive	0.059	221.167	no MS2: Prilocaine	[M+H]+	C13H20N2O	Alpha amino acid amides	MVFGUOIZUNYYSO-UHFFFAOYSA-N	C1=CC=CC(=C1C)NC(C(NCCC)C)=O	7.4672	5.72e-06	1.55186
1872	Positive	14.962	667.536	Unknown	[M+H]+	null	null	null	null	0.15081	5.76e-06	1.39302
1873	Positive	1.022	626.889	Unknown	[M+H]+	null	null	null	null	14.588	5.78e-06	1.56707
1874	Positive	13.934	267.286	Unknown	[M+H]+	null	null	null	null	10.775	5.78e-06	1.41702
1875	Positive	0.425	344.82	Unknown	[M+H]+	null	null	null	null	12.892	5.82e-06	1.44426
1876	Positive	1.019	678.946	Unknown	[M+H]+	null	null	null	null	8.3574	5.83e-06	1.25934
1877	Positive	8.119	446.29	Unknown	[M+H]+	null	null	null	null	0.15174	5.86e-06	1.35491
1878	Negative	12.061	327.219	low score: (10E,15Z)-9,12,13-trihydroxyoctadeca-10,15-dienoic acid	[M-H]-	C18H32O5	Lineolic acids and derivatives	MKYUCBXUUSZMQB-MKZMYESJSA-N	O=C(O)CCCCCCCC(O)C=CC(O)C(O)CC=CCC	2.2223	5.93e-06	1.34212
1879	Positive	11.656	372.338	low score: NCGC00380102-01!3-hexadecyl-4-methoxy-5-methyloxolan-2-one	[M+NH4]+	C22H42O3	Gamma butyrolactones	DJNFXUFERDZHCD-UHFFFAOYSA-N	CCCCCCCCCCCCCCCCC1C(OC)C(C)OC1=O	13.871	6e-06	1.54278
1880	Positive	11.049	279.185	low score: (6E)-2,6,10-trimethyldodeca-6,11-diene-2,3,10-triol_major	[M+Na]+	C15H28O3	Sesquiterpenoids	BGUYVWYUIXKRDO-XYOKQWHBSA-N	C=CC(C)(O)CCC=C(C)CCC(O)C(C)(C)O	0.27725	6.01e-06	1.2123
1881	Positive	8.49	502.314	no MS2: Serine conjugated chenodeoxycholic acid	[M+Na]+	C27H45NO6	Glycinated bile acids and derivatives	MIGXYHMLYVAUQT-DYUDRYMLSA-N	C[C@H](CCC(N[C@@H](CO)C(O)=O)=O)[C@H]1CC[C@@]2([H])[C@]3([H])[C@H](O)C[C@]4([H])C[C@H](O)CC[C@]4(C)[C@H]3CC[C@@]21C	28.447	6.07e-06	1.56286
1882	Positive	8.553	602.315	no MS2: NCGC00384679-01_C33H44O9_(1S,2S,3aR,4S,5S,6E,9R,11R,12E,13aS)-4,9,11-Triacetoxy-3a-hydroxy-2,5,8,8,12-pentamethyl-2,3,3a,4,5,8,9,10,11,13a-decahydro-1H-cyclopenta[12]annulen-1-yl benzoate	[M+NH4]+	C33H44O9	Jatrophane and cyclojatrophane diterpenoids	BRVXVMOWTHQKHC-LKCWGRRXSA-N	C[C@H]1C[C@]2(O)[C@@H](OC(C)=O)[C@@H](C)/C=C/C(C)(C)[C@@H](C[C@@H](OC(C)=O)\C(=C\[C@H]2[C@H]1OC(=O)C3=CC=CC=C3)C)OC(C)=O	8.5911	6.08e-06	1.21096
1883	Positive	7.801	484.302	low score: Taurolithocholate	[M+H]+	C26H45NO5S	Taurinated bile acids and derivatives	QBYUNVOYXHFVKC-GBURMNQMSA-N	C[C@H](CC/C(=N/CCS(=O)(=O)O)/O)[C@H]1CC[C@@H]2[C@@]1(CC[C@H]3[C@H]2CC[C@H]4[C@@]3(CC[C@H](C4)O)C)C	16.713	6.1e-06	1.16016
1884	Positive	1.102	756.759	Unknown	[M+H]+	null	null	null	null	4.8193	6.11e-06	1.17614
1885	Positive	11.247	543.384	Unknown	[M+H]+	null	null	null	null	50.929	6.15e-06	1.40399
1886	Positive	0.044	115.103	Unknown	[M+H]+	null	null	null	null	11.685	6.16e-06	1.58008
1887	Positive	1.062	596.799	Unknown	[M+H]+	null	null	null	null	12.03	6.16e-06	1.54515
1888	Positive	0.763	283.847	Unknown	[M+H]+	null	null	null	null	124.63	6.18e-06	1.62942
1889	Negative	1.441	336.034	low score: Famotidine	[M-H]-	C8H15N7O2S3	2,4-disubstituted thiazoles	XUFQPHANEAPEMJ-UHFFFAOYSA-N	O=S(=O)(N)NC(=N)CCSCC=1N=C(SC1)NC(=N)N	0.31929	6.22e-06	1.21624
1890	Positive	10.485	526.759	Unknown	[M+H]+	null	null	null	null	6.7355	6.31e-06	1.3127
1891	Positive	9.005	592.27	low score: (1S,2R,4S,9R,10R,14S,15S,17S)-9-(furan-3-yl)-1-hydroxy-15-[(1R)-1-hydroxy-2-methoxy-2-oxoethyl]-10,14,16,16-tetramethyl-7,18-dioxo-3,8-dioxapentacyclo[12.3.1.0?,?.0?,??.0?,??]octadecan-17-yl propanoate	[M+NH4]+	C30H38O11	Limonoids	FZBGZDZLYSLJFE-MVAMGWTESA-N	O=C(OC1C2(O)C(=O)C(C)(C3CCC4(C)C(OC(=O)CC4C53OC25)C6=COC=C6)C(C(O)C(=O)OC)C1(C)C)CC	13.453	6.39e-06	1.45532
1892	Positive	11.333	285.269	low score: h_58_bolasterone-m	[M-2H2O+H]+	C21H36O2	Androgens and derivatives	ZWQUPIDNCOVROC-HEEAJRSSSA-N	C[C@]1(O)CC[C@@H]2[C@]1(C)CC[C@H]3[C@H]2[C@H](C)C[C@@]4([H])[C@]3(C)CC[C@@H](O)C4	0.13221	6.42e-06	1.23192
1893	Positive	1.808	205.105	low score: Tryptophan	[M+H]+	C11H12N2O2	Indolyl carboxylic acids and derivatives	QIVBCDIJIAJPQS-UHFFFAOYSA-N	O=C(O)C(N)CC1=CNC=2C=CC=CC21	0.28272	6.46e-06	1.18983
1894	Positive	2.139	149.037	no MS2: 2-Hydroxyglutaric acid	[M+H]+	C5H8O5	Short-chain hydroxy acids and derivatives	HWXBTNAVRSUOJR-UHFFFAOYSA-N	O=C(O)CCC(O)C(=O)O	0.42301	6.5e-06	1.17626
1895	Positive	1.013	692.885	Unknown	[M+H]+	null	null	null	null	31.495	6.5e-06	1.64035
1896	Positive	1.04	802.858	Unknown	[M+H]+	null	null	null	null	2.5005	6.5e-06	1.18913
1897	Positive	0.423	289.911	Unknown	[M+H]+	null	null	null	null	15.142	6.53e-06	1.22581
1898	Positive	13.461	348.338	Unknown	[M+H]+	null	null	null	null	0.018975	6.53e-06	1.03431
1899	Positive	1.084	962.732	Unknown	[M+H]+	null	null	null	null	7.2895	6.53e-06	1.14472
1900	Positive	6.515	375.224	low score: 6a_Methylprednisolone	[M+H]+	C22H30O5	21-hydroxysteroids	VHRSUDSXCMQTMA-UHFFFAOYSA-N	[H]OC([H])([H])C(=O)C(O[H])(C([H])([H])4)C(C([H])([H])[H])(C([H])([H])3)C([H])(C([H])([H])4)C([H])(C([H])([H])1)C([H])(C([H])(O[H])3)C(C([H])=2)(C([H])([H])[H])C(=C([H])C(=O)C([H])2)C([H])(C([H])([H])[H])1	7.4164	6.55e-06	1.24768
1901	Positive	7.327	334.207	low score: NCGC00385992-01_C21H29NO_1-Methyl-2-[(6Z)-6-undecen-1-yl]-4(1H)-quinolinone	[M+Na]+	C21H29NO	Hydroquinolones	ILAQTUNYLVMXNW-SREVYHEPSA-N	CCCC\C=C/CCCCCC/1=C/C(=O)C2=CC=CC=C2N1C	0.18824	6.62e-06	1.50971
1902	Positive	13.601	157.096	no MS2: Unknown (carbon number 8); PlaSMA ID-276	[M+H]+	C8H12O3	Unknown	null	null	6.8409	6.69e-06	1.3044
1903	Positive	1.079	764.795	Unknown	[M+H]+	null	null	null	null	3.6412	6.73e-06	1.23938
1904	Positive	9.005	276.656	Unknown	[M+H]+	null	null	null	null	28.422	6.79e-06	1.40585
1905	Positive	13.484	420.245	no MS2: Phytosphingosine-1-P	[M+Na]+	C18H40NO6P	Phosphosphingolipids	AYGOSKULTISFCW-KZNAEPCWSA-N	CCCCCCCCCCCCCC[C@H]([C@@H]([C@@H](COP(=O)(O)O)N)O)O	0.17105	6.81e-06	1.41871
1906	Positive	1.103	446.88	Unknown	[M+H]+	null	null	null	null	5.0667	6.86e-06	1.29354
1907	Negative	1.646	633.095	low score: Calycin	[2M-2H+Na]-	C18H10O5	Benzofurans	CGRCGRBHNKRILW-JQIJEIRASA-N	c1ccc(cc1)C1=C(C(=C2c3ccccc3OC2=O)OC1=O)O	0.27531	6.86e-06	1.08686
1908	Positive	13.475	393.237	low score: monolinolein	[M+K]+	C21H38O4	Lineolic acids and derivatives	WECGLUPZRHILCT-HZJYTTRNSA-N	O=C(OCC(O)CO)CCCCCCCC=CCC=CCCCCC	0.21715	6.88e-06	1.36291
1909	Positive	9.085	506.392	low score: Leucine conjugated chenodeoxycholic acid	[M+H]+	C30H51NO5	Glycinated bile acids and derivatives	BAOWHAJSJGJSBV-FFCNHOLMSA-N	C[C@H](CCC(N[C@@H](CC(C)C)C(O)=O)=O)[C@H]1CC[C@@]2([H])[C@]3([H])[C@H](O)C[C@]4([H])C[C@H](O)CC[C@]4(C)[C@H]3CC[C@@]21C	0.11511	7.01e-06	1.33548
1910	Positive	11.207	478.368	low score: "((4R)-4-((3R,5S,7R,9S,10S,13R,14S,17R)-3,7-dihydroxy-10,13-dimethylhexadecahydro-1H-cyclopenta[a]phenanthren-17-yl)-2,2-dimethylpentanoyl)glycine"	[M+H]+	C28H47NO5	Glycinated bile acids and derivatives	HQPHGZUTNNVZLH-BOWXQMHNSA-N	[H][C@@]12[C@@H](O)C[C@@H]3C[C@H](O)CC[C@]3(C)[C@H]1CC[C@@]4(C)[C@H]2CC[C@@H]4[C@@H](CC(C)(C)C(NCC(O)=O)=O)C	0.075667	7.04e-06	1.41883
1911	Positive	12.082	623.361	Unknown	[M+H]+	null	null	null	null	11.184	7.07e-06	1.22408
1912	Positive	14.091	157.093	no MS2: SUBERATE	[M-H2O+H]+	C8H14O4	Medium-chain fatty acids	TYFQFVWCELRYAO-UHFFFAOYSA-N	OC(=O)CCCCCCC(O)=O	8.3884	7.11e-06	1.29497
1913	Positive	9.353	614.3	low score: NCGC00381019-01_C33H40O10_1H-Cyclopentacyclododecene-4,10(2H,5H)-dione, 3a,9,13-tris(acetyloxy)-1-(benzoyloxy)-3,3a,8,9,13,13a-hexahydro-2,5,8,8,12-pentamethyl-, (6E,11E)-	[M+NH4]+	C33H40O10	Jatrophane and cyclojatrophane diterpenoids	MVZQKKYLZHTDHU-QXUUVGOVSA-N	CC1CC2(OC(C)=O)C(C1OC(=O)C3=CC=CC=C3)C(OC(C)=O)C(=C/C(=O)C(OC(C)=O)C(C)(C)/C=C/C(C)C2=O)/C	18.167	7.12e-06	1.48402
1914	Positive	1.01	702.918	Unknown	[M+H]+	null	null	null	null	21.059	7.15e-06	1.47939
1915	Positive	8.33	521.409	Unknown	[M+H]+	null	null	null	null	39.321	7.15e-06	1.35812
1916	Negative	19.756	162.833	Unknown	[M-H]-	null	null	null	null	0.4228	7.15e-06	1.43354
1917	Positive	1.15	132.112	ISOLEUCINE	[M+H]+	C6H13NO2	Isoleucine and derivatives	AGPKZVBTJJNPAG-WHFBIAKZSA-N	CC[C@H](C)[C@@H](C(=O)O)N	2.7488	7.16e-06	1.44979
1918	Positive	1.032	548.865	Unknown	[M+H]+	null	null	null	null	22.846	7.17e-06	1.56583
1919	Positive	1.285	273.024	no MS2: Anhydrobrazilic Acid	[M+K]+	C12H10O5	Chromones	KVQVEJPIQHNLTM-UHFFFAOYSA-N	O=C(O)CC1=COC2=CC(OC)=CC=C2C1=O	10.026	7.24e-06	1.199
1920	Positive	12.129	543.383	Unknown	[M+H]+	null	null	null	null	0.14012	7.25e-06	1.20997
1921	Positive	1.054	879.816	Unknown	[M+H]+	null	null	null	null	3.3899	7.3e-06	1.02858
1922	Positive	9.279	358.395	Unknown	[M+H]+	null	null	null	null	429.87	7.33e-06	1.51699
1923	Positive	9.02	572.304	Unknown	[M+H]+	null	null	null	null	9.1369	7.42e-06	1.57458
1924	Positive	16.705	802.61	Unknown	[M+H]+	null	null	null	null	0.15804	7.61e-06	1.38936
1925	Positive	10.477	814.073	Unknown	[M+H]+	null	null	null	null	10.893	7.64e-06	1.2747
1926	Positive	0.219	689.617	Unknown	[M+H]+	null	null	null	null	0.2101	7.65e-06	1.2431
1927	Positive	1.049	934.839	Unknown	[M+H]+	null	null	null	null	5.5194	7.67e-06	1.18707
1928	Positive	0.473	133.939	Unknown	[M+H]+	null	null	null	null	585.32	7.72e-06	1.57658
1929	Positive	15.356	557.46	low score: (4R)-5',6a,8a,9-tetramethyldocosahydrospiro[naphtho[2',1':4,5]indeno[2,1-b]furan-10,2'-pyran]-4-yl nonanoate	[M+H]+	C36H60O4	Triterpenoids	BVMVRPVYRJQROP-XYUNULTHSA-N	O=C(OC1CCC2(C)C(CCC3C2CCC4(C)C3CC5OC6(OCC(C)CC6)C(C)C54)C1)CCCCCCCC	0.16633	7.77e-06	1.56689
1930	Positive	8.382	279.185	low score: (6E)-2,6,10-trimethyldodeca-6,11-diene-2,3,10-triol_49.3%	[M+Na]+	C15H28O3	Sesquiterpenoids	BGUYVWYUIXKRDO-XYOKQWHBSA-N	C=CC(C)(O)CCC=C(C)CCC(O)C(C)(C)O	0.29569	7.77e-06	1.16103
1931	Positive	10.504	525.783	Unknown	[M+H]+	null	null	null	null	6.8161	7.84e-06	1.36897
1932	Positive	10.486	314.051	no MS2: Isazofos	[M+H]+	C9H17ClN3O3PS	Aryl thiophosphates	XRHGWAGWAHHFLF-UHFFFAOYSA-N	CCOP(=S)(OCC)OC1=NN(C(C)C)C(Cl)=N1	25.214	7.88e-06	1.47433
1933	Positive	12.664	331.308	low score: MMV687273	[M+H]+	C22H38N2	Monoterpenoids	JFIBVDBTCDTBRH-IDUWFGFVSA-N	C(=C(C)C)CCC(=CCNCCNC1C2CC3CC(C2)CC1C3)C	69.765	7.89e-06	1.69273
1934	Positive	1.064	702.832	Unknown	[M+H]+	null	null	null	null	2.8672	7.89e-06	1.31671
1935	Positive	0.694	238.846	Unknown	[M+H]+	null	null	null	null	64.939	7.9e-06	1.47761
1936	Positive	8.345	520.408	Unknown	[M+H]+	null	null	null	null	68.25	7.9e-06	1.41629
1937	Positive	0.854	279.179	no MS2: Ethinyl estradiol	[M-H2O+H]+	C20H24O2	Estrogens and derivatives	BFPYWIDHMRZLRN-UHFFFAOYSA-N	Oc(c4)cc(C3)c(c4)C(C2)C(C3)C(C1)C(C)(C2)C(O)(C#C)C1	0.30849	7.91e-06	1.12553
1938	Negative	9.558	614.292	Unknown	[M-H]-	null	null	null	null	4.999	7.91e-06	1.36226
1939	Positive	8.533	552.367	low score: (3S,10R,13R)-10,13-dimethyl-17-octyl-2,3,4,7,8,9,10,11,12,13,14,15,16,17-tetradecahydro-1H-cyclopenta[a]phenanthren-3-yl (4-nitrophenyl) carbonate	[M+H]+	C34H49NO5	Androstane steroids	AFNDTSIACJAGSO-ZNBDOVCMSA-N	O=C(OC1=CC=C(C=C1)[N+](=O)[O-])OC2CC3=CCC4C(CCC5(C)C(CCCCCCCC)CCC45)C3(C)CC2	3.7703	7.96e-06	1.16142
1940	Positive	1.091	872.714	Unknown	[M+H]+	null	null	null	null	5.7806	7.98e-06	1.21644
1941	Positive	0.697	241.849	Unknown	[M+H]+	null	null	null	null	51.722	8.03e-06	1.39853
1942	Positive	1.039	660.885	no MS2: phytic acid	[M+H]+	C6H18O24P6	Inositol phosphates	IMQLKJBTEOYOSI-UHFFFAOYSA-N	O=P(O)(O)OC1C(OP(=O)(O)O)C(OP(=O)(O)O)C(OP(=O)(O)O)C(OP(=O)(O)O)C1OP(=O)(O)O	9.9041	8.17e-06	1.21462
1943	Positive	1.955	279.184	low score: (6E)-2,6,10-trimethyldodeca-6,11-diene-2,3,10-triol_major	[M+Na]+	C15H28O3	Sesquiterpenoids	BGUYVWYUIXKRDO-XYOKQWHBSA-N	C=CC(C)(O)CCC=C(C)CCC(O)C(C)(C)O	0.25082	8.19e-06	1.22675
1944	Positive	11.069	508.375	Unknown	[M+H]+	null	null	null	null	0.18254	8.21e-06	1.51617
1945	Positive	8.157	514.351	low score: Valine conjugated chenodeoxycholic acid	[M+Na]+	C29H49NO5	Glycinated bile acids and derivatives	DWKUILAFNXKAFN-OKQJRZLPSA-N	C[C@H](CCC(N[C@@H](C(C)C)C(O)=O)=O)[C@H]1CC[C@@]2([H])[C@]3([H])[C@H](O)C[C@]4([H])C[C@H](O)CC[C@]4(C)[C@H]3CC[C@@]21C	0.20264	8.24e-06	1.30265
1946	Positive	1.04	704.916	Unknown	[M+H]+	null	null	null	null	5.7789	8.28e-06	1.05657
1947	Positive	7.805	504.332	low score: glutamate conjugated chenodeoxycholic acid	[M-H2O+H]+	C29H47NO7	Glycinated bile acids and derivatives	MHOZNCAVRHAOKT-PYDJSGOHSA-N	O=C(O)CCC(N=C(O)CCC(C)C1CCC2C3C(O)CC4CC(O)CCC4(C)C3CCC12C)C(=O)O	29.8	8.39e-06	1.47709
1948	Positive	1.238	316.967	Unknown	[M+H]+	null	null	null	null	6.5866	8.45e-06	1.27643
1949	Positive	0.432	240.849	Unknown	[M+H]+	null	null	null	null	176.92	8.55e-06	1.50738
1950	Positive	14.38	451.243	no MS2: Ingenol-3,4-5,20-diacetonide	[M+Na]+	C26H36O5	Ketals	JOKBBQPBIIZMJV-JQFFUGKZSA-N	O=C1C2C=C3COC(OC3C45OC(OC5C(=CC14C(C)CC6C2C6(C)C)C)(C)C)(C)C	24.546	8.6e-06	1.3889
1951	Positive	1.045	817.887	Unknown	[M+H]+	null	null	null	null	4.0744	8.61e-06	1.08123
1952	Positive	18.605	829.613	Unknown	[M+H]+	null	null	null	null	0.18479	8.65e-06	1.54076
1953	Positive	0.352	171.113	Unknown (carbon number 13); PlaSMA ID-399	[M+H]+	C13H14	Unknown	null	null	29.213	8.68e-06	1.56807
1954	Positive	0.432	302.92	Unknown	[M+H]+	null	null	null	null	4.9499	8.69e-06	1.07898
1955	Positive	1.041	754.894	Unknown	[M+H]+	null	null	null	null	2.2747	8.77e-06	1.07965
1956	Positive	0.578	279.184	low score: (6E)-2,6,10-trimethyldodeca-6,11-diene-2,3,10-triol_major	[M+Na]+	C15H28O3	Sesquiterpenoids	BGUYVWYUIXKRDO-XYOKQWHBSA-N	C=CC(C)(O)CCC=C(C)CCC(O)C(C)(C)O	0.26623	8.8e-06	1.19017
1957	Positive	1.257	314.971	Unknown	[M+H]+	null	null	null	null	102.22	8.81e-06	1.47339
1958	Positive	13.461	313.298	Unknown	[M+H]+	null	null	null	null	0.0143	8.81e-06	1.0167
1959	Positive	1.146	166.086	Phenylalanine	[M+H]+	C9H11NO2	Phenylalanine and derivatives	COLNVLDHVKWLRT-UHFFFAOYSA-N	O=C(O)C(N)CC=1C=CC=CC1	4.1885	8.91e-06	1.24331
1960	Positive	11.157	325.235	low score: GLYCEROL-MYRISTATE	[M+Na]+	C17H34O4	1-monoacylglycerols	DCBSHORRWZKAKO-UHFFFAOYSA-N	CCCCCCCCCCCCCC(=O)OCC(CO)O	0.22382	8.91e-06	1.46607
1961	Positive	11.069	114.1	low score: Unknown (carbon number 6); PlaSMA ID-45	[M+H]+	C6H11NO	Unknown	null	null	9.2276	8.97e-06	1.68332
1962	Positive	1.168	158.128	low score: Buformin	[M+H]+	C6H15N5	Biguanides	XSEUMFJMFFMCIU-UHFFFAOYSA-N	CCCCNC(=N)NC(N)=N	0.29588	9.07e-06	1.27156
1963	Positive	1.045	608.832	Unknown	[M+H]+	null	null	null	null	4.0031	9.07e-06	1.38025
1964	Positive	10.056	285.25	no MS2: NCGC00381375-01!(6E)-heptadeca-6,16-diene-1,2,4-triol [IIN-based: Match]	[M+H-H2O]+	C17H32O3	Long-chain fatty alcohols	XGZOTDFONIAWEC-VAWYXSNFSA-N	OCC(O)CC(O)C\\C=C\\CCCCCCCCC=C	0.050264	9.07e-06	1.26744
1965	Positive	12.504	312.325	Unknown	[M+H]+	null	null	null	null	8.6353	9.13e-06	1.24608
1966	Positive	1.14	202.198	Unknown	[M+H]+	null	null	null	null	0.11497	9.17e-06	1.11346
1967	Positive	0.528	245.823	Unknown	[M+H]+	null	null	null	null	71.642	9.23e-06	1.62877
1968	Positive	11.037	524.409	Unknown	[M+H]+	null	null	null	null	0.19485	9.24e-06	1.19576
1969	Positive	11.246	502.349	low score: (2R,3S,4S,5S,6R)-2-[[7-hydroxy-4-[(Z)-5-hydroxy-3-methylpent-3-enyl]-4a,8,8-trimethyl-3-methylidene-2,4,5,6,7,8a-hexahydro-1H-naphthalen-2-yl]oxy]-6-(hydroxymethyl)oxane-3,4,5-triol	[M+NH4]+	C26H44O8	Diterpene glycosides	JECOCDKQCZSANH-RFKAOMIISA-N	OCC=C(C)CCC1C(=C)C(OC2OC(CO)C(O)C(O)C2O)CC3C(C)(C)C(O)CCC13C	8.6532	9.28e-06	1.18763
1970	Positive	9.052	592.386	low score: Edpetiline	[M+H]+	C33H53NO8	Steroidal saponins	DHQFYEJMFMYGCV-UHFFFAOYSA-N	O=C1CC2C3CCC4C(CN5CC(C)CCC5C4(O)C)C3CC2C6(C)CCC(OC7OC(CO)C(O)C(O)C7O)CC16	0.18854	9.29e-06	1.37631
1971	Positive	1.337	426.359	low score: Oleoyl-L-Carnitine	[M+H]+	C25H47NO4	Acyl carnitines	IPOLTUVFXFHAHI-WHIOSMTNSA-N	CCCCCCCC/C=C\CCCCCCCC(=O)O[C@H](CC(=O)[O-])C[N+](C)(C)C	0.011738	9.38e-06	1.26967
1972	Negative	1.275	213.986	Unknown	[M-H]-	null	null	null	null	0.21245	9.55e-06	1.36788
1973	Positive	12.501	753.513	Unknown	[M+H]+	null	null	null	null	6.6984	9.73e-06	1.09623
1974	Positive	12.153	601.381	low score: Timosaponin A1	[M+Na]+	C33H54O8	Steroidal saponins	ZNEIIZNXGCIAAL-UHFFFAOYSA-N	OCC1OC(OC2CCC3(C)C(CCC4C3CCC5(C)C4CC6OC7(OCC(C)CC7)C(C)C65)C2)C(O)C(O)C1O	17.602	9.83e-06	1.07789
1975	Positive	1.175	602.705	Unknown	[M+H]+	null	null	null	null	4.422	9.83e-06	1.19487
1976	Positive	12.402	221.168	low score: Prilocaine	[M+H]+	C13H20N2O	Alpha amino acid amides	MVFGUOIZUNYYSO-UHFFFAOYSA-N	C1=CC=CC(=C1C)NC(C(NCCC)C)=O	2.6296	9.89e-06	1.42924
1977	Positive	0.436	261.89	Unknown	[M+H]+	null	null	null	null	52.085	9.92e-06	1.18837
1978	Positive	1.816	102.099	low score: CYCLOPENTANONE	[M+NH4]+	C5H8O	Cyclic ketones	BGTOWKSIORTVQH-UHFFFAOYSA-N	C1CCC(=O)C1	3.9011	1e-05	1.21654
1979	Positive	8.534	279.668	Unknown	[M+H]+	null	null	null	null	20.501	1e-05	1.47728
1980	Positive	1.035	494.85	Unknown	[M+H]+	null	null	null	null	9.1667	1.01e-05	1.4641
1981	Positive	8.44	524.313	low score: Tobramycin, N-propionyl derivative likely	[M+H]+	C21H41N5O10	4,6-disubstituted 2-deoxystreptamines	XMVDIYAEPSBCDQ-HXNOWKDOSA-N	O[C@H]1[C@H](N)[C@@H](O)[C@@H](O[C@H]2[C@H](N)C[C@H](N)[C@@H](O[C@@H]3[C@H](N)C[C@H](O)[C@@H](CNC(CC)=O)O3)[C@@H]2O)O[C@@H]1CO	7.0733	1.02e-05	1.25192
1982	Positive	1.05	538.837	Unknown	[M+H]+	null	null	null	null	12.848	1.02e-05	1.60607
1983	Positive	1.042	936.842	Unknown	[M+H]+	null	null	null	null	4.5645	1.04e-05	1.33429
1984	Positive	1.172	302.224	low score: Unknown (carbon number 14); PlaSMA ID-1564	[M+H]+	C14H27N3O4	Unknown	null	null	0.14031	1.05e-05	1.06208
1985	Positive	8.898	504.343	low score: "((4R)-4-((3R,5S,7R,9S,10S,13R,14S,17R)-3,7-dihydroxy-10,13-dimethylhexadecahydro-1H-cyclopenta[a]phenanthren-17-yl)pentanoyl)-D-phenylalanine"	[M-2H2O+H]+	C33H49NO5	Glycinated bile acids and derivatives	CEMZGPKUKMFNNF-TUBYWNESSA-N	[H][C@@]12[C@H](O)C[C@@H]3C[C@H](O)CC[C@]3(C)[C@H]1CC[C@@]4(C)[C@H]2CC[C@@H]4[C@@H](CCC(N[C@H](CC5=CC=CC=C5)C(O)=O)=O)C	4.6848	1.06e-05	1.33882
1986	Positive	1.262	290.097	no MS2: NCGC00384658-01!7-methoxy-8-(3-methyl-5-oxo-2H-furan-4-yl)chromen-2-one	[M+NH4]+	C15H12O5	Coumarins and derivatives	AZYVCLJYWIHOAD-UHFFFAOYSA-N	COC1=CC=C2C=CC(=O)OC2=C1C3=C(C)COC3=O	6.7745	1.06e-05	1.33434
1987	Positive	1.026	668.921	Unknown	[M+H]+	null	null	null	null	12.203	1.06e-05	1.27986
1988	Positive	0.425	319.189	low score: Coenzyme Q2	[M+H]+	C19H26O4	Ubiquinones	SQQWBSBBCSFQGC-JLHYYAGUSA-N	CC1=C(C(=O)C(=C(C1=O)OC)OC)C/C=C(\C)/CCC=C(C)C	8.4396	1.06e-05	1.20618
1989	Positive	1.041	687.916	Unknown	[M+H]+	null	null	null	null	3.1866	1.07e-05	0.963802
1990	Positive	1.022	446.921	Unknown	[M+H]+	null	null	null	null	7.9253	1.07e-05	1.50311
1991	Positive	16.093	369.366	low score: Coprostanone	[M-H2O+H]+	C27H46O	Cholesterols and derivatives	PESKGJQREUXSRR-JAGYRSRJSA-N	C(C)(C1)(C(C(C)CCCC(C)C)4)C(CC4)C(C2)C(C(C)(C3)C([H])(CC(C3)=O)C2)C1	11.847	1.07e-05	1.0209
1992	Positive	13.038	457.381	Unknown	[M+H]+	null	null	null	null	6.1875	1.08e-05	1.30264
1993	Positive	1.04	690.818	Unknown	[M+H]+	null	null	null	null	3.2442	1.09e-05	1.03472
1994	Positive	7.804	437.225	low score: Nonaethylene glycol	[M+Na]+	C18H38O10	Polyethylene glycols	YZUUTMGDONTGTN-UHFFFAOYSA-N	OCCOCCOCCOCCOCCOCCOCCOCCOCCO	36.917	1.1e-05	1.28503
1995	Positive	0.661	100.084	no MS2: 2-Piperidone; CE0; XUWHAWMETYGRKB-UHFFFAOYSA-N	[M+H]+	C5H9NO	Piperidinones	XUWHAWMETYGRKB-UHFFFAOYSA-N	C1CCN=C(C1)O	10.327	1.12e-05	1.55992
1996	Positive	0.404	494.847	Unknown	[M+H]+	null	null	null	null	5.7694	1.12e-05	1.18561
1997	Positive	14.38	782.621	Unknown	[M+H]+	null	null	null	null	0.23681	1.12e-05	1.0647
1998	Positive	1.073	937.842	Unknown	[M+H]+	null	null	null	null	4.0678	1.13e-05	1.07952
[truncated: 2,419 more rows]
