# Supplementary material
Source: Research Square preprint supplement (doi:10.21203/rs.3.rs-9323973/v1)
Supplement: Supplementary file 4 [file 98fa8debf3f4a53a56642048.xlsx]

## Sheet: Sheet1
Supplementary table S6. Screening of putative metabolites with biomarker potential of RABV infection in mice (ranked by AUROC of clinical infection).
No.	Ionization mode	Average RT (min)	Average MZ	Metabolite name	Adduct type	Chemical formula	Ontology	INCHIKEY	SMILES	Early infection - Fold change	Early infection - FDR	Late infection - Fold change	Late infection - FDR	Clinical infection - Fold change	Clinical infection - FDR	Early infection - oPLS-DA VIP	Late infection - oPLS-DA VIP	Clinical infection - oPLS-DA VIP	Early infection - AUROC	Late infection - AUROC	Clinical infection - AUROC
1	Positive	15.397	324.246	no MS2: Melophlin B/C/G/K/L/N/O	[M+H]+	C19H33NO3	N-alkylpyrrolidines	WBPPODSRZVXVJK-MSUUIHNZSA-N	CCCCCCCCCCCC/C(O)=C(C1=O)\C(C(N1C)C)=O	0.14548	2.04e-06	0.46248	0.0089387	0.0071034	1.59e-21	2.20965	1.66837	2.18675	1	0.868056	1
2	Positive	11.051	324.247	low score: Melophlin B/C/G/K/L/N/O	[M+H]+	C19H33NO3	N-alkylpyrrolidines	WBPPODSRZVXVJK-MSUUIHNZSA-N	CCCCCCCCCCCC/C(O)=C(C1=O)\C(C(N1C)C)=O	0.14894	1.81e-06	0.43829	0.0066301	0.010095	1.59e-21	2.19708	1.7092	2.12482	1	0.854167	1
3	Positive	19.874	419.354	low score: "5β-Cholestane-3α,7α,12α,26-tetrol"	[M-H2O+H]+	C27H48O4	Tetrahydroxy bile acids, alcohols and derivatives	XJZGNVBLVFOSKJ-XZULNKEGSA-N	C[C@H](CCCC(C)CO)[C@H]1CC[C@H]2[C@]3([H])[C@H](O)C[C@@H]4C[C@H](O)CC[C@]4(C)[C@H]3C[C@H](O)[C@@]21C	0.15172	2.04e-06	0.42912	0.0059626	0.011404	3.53e-21	2.2516	1.75058	2.12178	0.98611	0.847222	1
4	Positive	10.731	324.246	no MS2: Melophlin B/C/G/K/L/N/O	[M+H]+	C19H33NO3	N-alkylpyrrolidines	WBPPODSRZVXVJK-MSUUIHNZSA-N	CCCCCCCCCCCC/C(O)=C(C1=O)\C(C(N1C)C)=O	0.16067	2.35e-06	0.47187	0.0089899	0.015681	6.87e-21	2.1394	1.66185	2.12304	1	0.833333	1
5	Positive	13.226	324.247	no MS2: Melophlin B/C/G/K/L/N/O	[M+H]+	C19H33NO3	N-alkylpyrrolidines	WBPPODSRZVXVJK-MSUUIHNZSA-N	CCCCCCCCCCCC/C(O)=C(C1=O)\C(C(N1C)C)=O	0.153	2.26e-06	0.47656	0.0096026	0.010214	7.82e-20	2.1768	1.67723	2.06684	1	0.840278	1
6	Positive	9.528	324.246	low score: Melophlin B/C/G/K/L/N/O	[M+H]+	C19H33NO3	N-alkylpyrrolidines	WBPPODSRZVXVJK-MSUUIHNZSA-N	CCCCCCCCCCCC/C(O)=C(C1=O)\C(C(N1C)C)=O	0.16251	1.95e-06	0.40326	0.0035566	0.019745	5.35e-19	2.08565	1.75019	2.01775	1	0.861111	1
7	Positive	13.582	398.271	no MS2: Phytosphingosine-1-P	[M+H]+	C18H40NO6P	Phosphosphingolipids	AYGOSKULTISFCW-KZNAEPCWSA-N	CCCCCCCCCCCCCC[C@H]([C@@H]([C@@H](COP(=O)(O)O)N)O)O	0.11363	4.02e-07	0.4161	0.004515	0.014182	2.46e-18	2.10278	1.70673	2.07189	1	0.847222	1
8	Positive	8.912	324.248	low score: Melophlin B/C/G/K/L/N/O	[M+H]+	C19H33NO3	N-alkylpyrrolidines	WBPPODSRZVXVJK-MSUUIHNZSA-N	CCCCCCCCCCCC/C(O)=C(C1=O)\C(C(N1C)C)=O	0.14133	7.58e-07	0.42691	0.004978	0.023894	5.57e-18	2.06179	1.60026	1.97165	1	0.854167	1
9	Positive	0.532	325.249	low score: allo-Protolichesterinic acid	[M+H]+	C19H32O4	Gamma butyrolactones	WZYZDHVPSZCEEP-IRXDYDNUSA-N	CCCCCCCCCCCCC[C@@H]1OC(=O)C(=C)[C@@H]1C(=O)O	0.18023	2.14e-06	0.48065	0.0088232	0.037127	1.54e-17	2.00295	1.47648	2.03952	1	0.854167	1
10	Positive	19.915	441.338	low score: NCGC00169592-02_C29H46O4_3aH-Cyclopenta[a]chrysene-3a-carboxylic acid, 1-acetyleicosahydro-9-hydroxy-5a,5b,8,8,11a-pentamethyl-, (1R,3aS,5aR,5bR,9S,11aR)-	[M-H2O+H]+	C29H46O4	Oxosteroids	RVMPLOSJMIQORE-XPDAHERZSA-N	CC(=O)[C@@H]1CC[C@@]2(CC[C@]3(C)C(CCC4[C@@]5(C)CC[C@H](O)C(C)(C)C5CC[C@@]34C)C12)C(O)=O	0.12349	1.03e-06	0.41032	0.0049672	0.010746	2.05e-17	2.15162	1.83341	2.05554	1	0.930556	1
11	Positive	5.916	122.105	2,6-Xylidine	[M+H]+	C8H11N	m-Xylenes	UFFBMTHBGFGIHF-UHFFFAOYSA-N	Cc1cccc(c1N)C	6.8384	4.85e-06	8.8404	0.0055097	6.8511	3.08e-17	1.88398	1.27924	1.99767	0.98611	0.986111	1
12	Positive	19.828	441.339	low score: NCGC00169592-02_C29H46O4_3aH-Cyclopenta[a]chrysene-3a-carboxylic acid, 1-acetyleicosahydro-9-hydroxy-5a,5b,8,8,11a-pentamethyl-, (1R,3aS,5aR,5bR,9S,11aR)-	[M-H2O+H]+	C29H46O4	Oxosteroids	RVMPLOSJMIQORE-XPDAHERZSA-N	CC(=O)[C@@H]1CC[C@@]2(CC[C@]3(C)C(CCC4[C@@]5(C)CC[C@H](O)C(C)(C)C5CC[C@@]34C)C12)C(O)=O	0.11407	6.56e-07	0.38344	0.0034585	0.0090414	3.08e-17	2.20392	1.80613	2.03711	1	0.930556	1
13	Positive	8.835	288.281	low score: C17-Sphinganine	[M+H]+	C17H37NO2	1,2-aminoalcohols	KFQUQCFJDMSIJF-UHFFFAOYSA-N	CCCCCCCCCCCCCCC(C(CO)N)O	0.10007	4.41e-07	0.46964	0.0086084	0.0041635	1.24e-16	2.00919	1.4415	1.95504	1	0.833333	1
14	Positive	9.113	324.244	low score: Melophlin B/C/G/K/L/N/O	[M+H]+	C19H33NO3	N-alkylpyrrolidines	WBPPODSRZVXVJK-MSUUIHNZSA-N	CCCCCCCCCCCC/C(O)=C(C1=O)\C(C(N1C)C)=O	0.17811	3.68e-06	0.47844	0.009003	0.027002	1.97e-16	2.03023	1.56473	1.98985	0.9375	0.847222	1
15	Positive	6.728	383.3	low score: Geranylgeranyl 1,4-hydroquinone	[M+H]+	C26H38O2	Diterpenoids	FIPAQYYZFDCRDD-FPFQZNTGSA-N	OC1=C(C/C=C(CC/C=C(C)/CC/C=C(C)/CC/C=C(C)\C)\C)C=C(O)C=C1	0.19009	6.07e-06	0.44238	0.0059376	0.015556	4.78e-16	2.0566	1.69159	1.92844	0.9375	0.930556	1
16	Positive	8.772	558.344	low score: Dimethyl ketal of oxysporidinone_130004	[M+Na]+	C30H49NO7	Terpene glycosides	OKLOELQSMKXXGE-RCCKNPSSSA-N	OC1CC(OC)(OC)CCC1(O)C2=CN(C)C(C(C3OC(/C(C)=C/C(C)CC(C)CC)C(C)CC3)=C2O)=O	0.16643	2.33e-06	0.33352	0.0011794	0.021276	6.62e-16	2.13679	1.85752	2.03079	0.94792	0.944444	1
17	Positive	7.064	875.316	low score: NCGC00385098-01![8,8-dimethyl-9-(3-methylbut-2-enoyloxy)-2-oxo-9,10-dihydropyrano[2,3-f]chromen-10-yl] 3-methylbut-2-enoate [IIN-based on: CCMSLIB00000846416]	[2M+Na]+	C24H26O7	Angular pyranocoumarins	UHWIZIJICYWABA-UHFFFAOYSA-N	CC(C)=CC(=O)OC1C(OC(=O)C=C(C)C)C(C)(C)OC2=CC=C3C=CC(=O)OC3=C12	0.075306	2.24e-07	0.2608	0.0010729	0.004902	9.66e-16	2.05504	1.90949	2.05879	1	0.972222	1
18	Positive	0.725	287.248	low score: Unknown (carbon number 20); PlaSMA ID-1412	[M+H]+	C20H30O	Unknown	null	null	0.18635	1.88e-06	0.4576	0.0052584	0.056198	1.02e-15	2.1893	1.71109	2.002	1	0.993056	1
19	Positive	9.104	325.252	low score: allo-Protolichesterinic acid	[M+H]+	C19H32O4	Gamma butyrolactones	WZYZDHVPSZCEEP-IRXDYDNUSA-N	CCCCCCCCCCCCC[C@@H]1OC(=O)C(=C)[C@@H]1C(=O)O	0.19639	4.95e-06	0.39626	0.0032577	0.041621	1.07e-15	1.8822	1.68744	1.94924	0.97222	0.972222	1
20	Positive	8.324	324.247	low score: Melophlin B/C/G/K/L/N/O	[M+H]+	C19H33NO3	N-alkylpyrrolidines	WBPPODSRZVXVJK-MSUUIHNZSA-N	CCCCCCCCCCCC/C(O)=C(C1=O)\C(C(N1C)C)=O	0.16689	1.81e-06	0.44418	0.0060291	0.030343	1.11e-15	1.95949	1.59629	1.88002	0.98611	0.875	1
21	Positive	7.104	970.34	low score: NCGC00385068-01!methyl 4-methoxy-2-[(2S,3R,4S,5S,6R)-3,4,5-trihydroxy-6-[[(2S,3R,4S,5R)-3,4,5-trihydroxyoxan-2-yl]oxymethyl]oxan-2-yl]oxybenzoate [IIN-based on: CCMSLIB00000848774]	[2M+NH4]+	C20H28O13	Phenolic glycosides	DZRVGBRAMLSZDQ-HSMQXHTESA-N	COC(=O)C1=CC=C(OC)C=C1O[C@@H]2O[C@H](CO[C@@H]3OC[C@@H](O)[C@H](O)[C@H]3O)[C@@H](O)[C@H](O)[C@H]2O	0.10578	8e-07	0.34145	0.0028894	0.0068492	1.49e-15	2.03397	1.71051	1.94239	1	0.930556	1
22	Positive	8.788	566.369	low score: "1,2-DIDECANOYL-SN-GLYCERO-3-PHOSPHOCHOLINE"	[M+H]+	C28H56NO8P	Phosphatidylcholines	MLKLDGSYMHFAOC-AREMUKBSSA-N	CCCCCCCCCC(=O)OC[C@H](COP(=O)([O-])OCC[N+](C)(C)C)OC(=O)CCCCCCCCC	0.1078	2.14e-07	0.38388	0.0026299	0.027362	2.52e-15	2.19503	1.76498	1.98519	1	0.916667	1
23	Positive	6.35	130.171	low score: Octylamine	[M+H]+	C8H19N	Monoalkylamines	IOQPZZOEVPZRBK-UHFFFAOYSA-N	CCCCCCCCN	0.17779	4.03e-06	0.48085	0.009504	0.031833	4.62e-15	1.99044	1.67374	1.96489	1	0.916667	1
24	Positive	0.577	222.133	low score: Dihydrozeatin	[M+H]+	C10H15N5O	6-alkylaminopurines	XXFACTAYGKKOQB-UHFFFAOYSA-N	OCC(C)CCNC=1N=CNC2=NC=NC21	0.2176	5.56e-06	0.4603	0.0056662	0.045501	6.02e-15	1.94393	1.66009	1.91653	0.97917	0.965278	1
25	Positive	8.772	802.058	low score: (NAG)(NAM)-AqOA[3-NH2-SATA];(G-G)-(NAG)(NAM)-AqOA[3-NH2-SATA]	[M+3H]3+	C96H162N24O47	Polypeptides	QMVZTJWZCDWESW-UHFFFAOYSA-N	CC(=O)NC1C(OC2C(CO)OC(OC3C(CO)OC(OC4C(CO)OC(O)C(NC(C)=O)C4OC(C)C(=O)NC(C)C(=O)NC(CCC(=O)NC(CCCNC(=O)C(CO)NC(=O)C(C)NC(=O)C(NC(=O)C(C)N)C(C)O)C(=O)NC(C)C(=O)O)C(N)=O)C(NC(C)=O)C3O)C(NC(C)=O)C2OC(C)C(=O)NC(C)C(=O)NC(CCC(=O)NC(CCCNC(=O)C(CO)NC(=O)C(C)NC(=O)C(NC(=O)C(C)N)C(C)O)C(=O)NC(C)C(=O)O)C(N)=O)OC(CO)C(O)C1O	0.12816	2.23e-06	0.24494	0.000772	0.0012474	6.45e-15	1.91957	1.75626	1.89371	0.95833	0.986111	1
26	Positive	8.77	542.372	low score: NCGC00381175-01!3-hydroxy-2-[[3-[3-(3-hydroxy-6-methylheptanoyl)oxy-6-methylheptanoyl]oxy-8-methylnonanoyl]amino]propanoic acid [IIN-based on: CCMSLIB00000848442]	[M-H2O+H]+	C29H53NO9	N-acyl-alpha amino acids	MWZPHNZNPKKSEI-UHFFFAOYSA-N	CC(C)CCCCC(CC(=O)NC(CO)C(O)=O)OC(=O)CC(CCC(C)C)OC(=O)CC(O)CCC(C)C	0.17605	3.91e-06	0.35155	0.0011841	0.020483	6.64e-15	2.03021	1.96424	1.89757	0.98611	0.986111	1
27	Positive	6.626	312.194	low score: Dienogest	[M+H]+	C20H25NO2	Oxosteroids	AZFLJNIPTRTECV-FUMNGEBKSA-N	C[C@]12CCC3=C4CCC(=O)C=C4CC[C@H]3[C@@H]1CC[C@]2(CC#N)O	0.2572	2.04e-06	0.49396	0.0035701	0.13543	1.26e-14	1.84104	1.57937	1.77025	1	0.902778	1
28	Positive	11.047	325.248	low score: GLYCEROL-MYRISTATE	[M+Na]+	C17H34O4	1-monoacylglycerols	DCBSHORRWZKAKO-UHFFFAOYSA-N	CCCCCCCCCCCCCC(=O)OCC(CO)O	0.18003	4.22e-06	0.47865	0.0096026	0.02892	2.13e-14	2.14201	1.54935	1.94608	0.98611	0.840278	1
29	Positive	9.523	325.251	low score: GLYCEROL-MYRISTATE	[M+Na]+	C17H34O4	1-monoacylglycerols	DCBSHORRWZKAKO-UHFFFAOYSA-N	CCCCCCCCCCCCCC(=O)OCC(CO)O	0.16192	1.81e-06	0.38956	0.0025478	0.03553	2.48e-14	2.18326	1.80181	1.92031	0.98611	0.923611	1
30	Positive	0.275	441.336	low score: NCGC00169592-02_C29H46O4_3aH-Cyclopenta[a]chrysene-3a-carboxylic acid, 1-acetyleicosahydro-9-hydroxy-5a,5b,8,8,11a-pentamethyl-, (1R,3aS,5aR,5bR,9S,11aR)-	[M-H2O+H]+	C29H46O4	Oxosteroids	RVMPLOSJMIQORE-XPDAHERZSA-N	CC(=O)[C@@H]1CC[C@@]2(CC[C@]3(C)C(CCC4[C@@]5(C)CC[C@H](O)C(C)(C)C5CC[C@@]34C)C12)C(O)=O	0.20021	7.94e-06	0.47485	0.0093924	0.035483	2.51e-14	2.00037	1.42591	1.89795	0.91667	0.847222	1
31	Positive	10.572	388.248	low score: (1r,5R,7S)-5,7-diethyl-2-(1-ethyl-2-methyl-1H-indol-3-yl)-1,3-diazaadamantan-6-one	[M+Na]+	C23H31N3O	N-alkylindoles	KRYFHYSXWHRZKT-BRTIRZTQSA-N	O=C1C2(CN3CC1(CN(C2)C3C=4C=5C=CC=CC5N(C4C)CC)CC)CC	0.095704	3.7e-07	0.48044	0.0094911	0.008448	2.7e-14	2.19821	1.43471	1.93739	1	0.833333	1
32	Positive	10.565	365.17	low score: Magnoflorine	[M+Na]+	C20H24NO4	Aporphines	YLRXAIKMLINXQY-ZDUSSCGKSA-O	OC=1C(OC)=CC=C2C1C=3C(O)=C(OC)C=C4C3C(C2)[N+](C)(C)CC4	0.091151	2.2e-07	0.46974	0.0090161	0.014055	2.75e-14	2.08396	1.51445	1.83434	1	0.805556	1
33	Positive	8.465	302.174	no MS2: octyltyrazolone	[M+H]+	C18H23NO3	Alpha amino acids and derivatives	LETLVQJZVBVGKT-SSZFMOIBSA-N	OC1=CC=C(/C=C2N=C(CCCCCCCC)OC\2=O)C=C1	0.23855	3.23e-07	0.41828	0.00044872	0.1299	5.18e-14	1.96578	1.73439	1.84455	0.99306	0.961806	1
34	Positive	7.404	340.262	low score: ormosanine	[M+Na]+	C20H35N3	Ormosia-type alkaloids	YUKCLPPRYNXRAF-CPPNMTBBSA-N	N1CCCCC1C23CN4CCCCC4C(CC5CCCNC52)C3	0.1548	4.32e-07	0.3805	0.0015249	0.052865	6.04e-14	1.97675	1.86184	1.86219	1	0.930556	1
35	Positive	7.066	972.349	low score: (NAG)(NAM)-AemC	[M+H]+	C37H61N7O21S	Oligopeptides	JLDNMWCWVRSBND-UHFFFAOYSA-N	CC(=O)NC1C(OC2C(CO)OC(O)C(NC(C)=O)C2OC(C)C(=O)NC(C)C(=O)NC(CCC(=O)NC(CCCC(N)C(=O)O)C(=O)NC(CS)C(=O)O)C(=O)O)OC(CO)C(O)C1O	0.074644	2.4e-07	0.24593	0.00066553	0.0071374	7.94e-14	2.14544	1.88867	1.87693	1	0.993056	1
36	Positive	13.352	331.315	low score: MMV687273	[M+H]+	C22H38N2	Monoterpenoids	JFIBVDBTCDTBRH-IDUWFGFVSA-N	C(=C(C)C)CCC(=CCNCCNC1C2CC3CC(C2)CC1C3)C	0.16839	8.84e-06	0.38135	0.0047838	0.00079655	1e-13	1.86438	1.62892	1.85559	0.87153	0.805556	1
37	Positive	1.331	297.094	low score: OCP_297.1002_16.5	[M+H]+	C14H17ClN2O3	Phenylpiperazines	FMKKWAHJJLLAOW-UHFFFAOYSA-N	OC(=O)CCC(=O)N1CCN(CC1)c1ccccc1Cl	9.4555	1.92e-08	7.0919	0.00093451	10.558	1.23e-13	2.11665	1.88264	1.94831	1	0.833333	1
38	Positive	7.066	875.411	low score: Waikialoid A_130022	[M+H]+	C52H54N6O7	Indolocarbazoles	WZHCMAFZIFECCV-LYUUMHETSA-N	CC1(C)C=CC2=C3C(C([C@@]4([H])C5(N6)C(C[C@]7(N(CCC7)C5=O)C6=O)C8(C)C)([C@@](C9(N%104)C(C[C@@]%11(N(CCC%11)C9=O)C%10=O)C%12(C)C)([H])C%13=C%12NC%14=C(C=CC(C)(C)O%15)C%15=CC=C%14%13)C8=[N+]3[O-])=CC=C2O1	0.094923	6.79e-07	0.28126	0.0011794	0.0069959	1.31e-13	2.07601	1.75573	1.86173	1	0.993056	1
39	Positive	7.059	972.122	low score: 2-[(5S,25R,26R,29S,30S,31S)-13,14,15,18,19,20,31,35,36-nonahydroxy-2,10,23,28,32-pentaoxo-5-(3,4,5-trihydroxybenzoyloxy)-3,6,9,24,27,33-hexaoxaheptacyclo[28.7.1.0?,??.0?,??.0??,??.0??,??.0??,??]octatriaconta-1(38),11(16),12,14,17,19,21,34,36-nonaen-29-yl]acetic acid	[M+NH4]+	C41H30O27	Hydrolyzable tannins	HGJXAVROWQLCTP-YSNZXMJVSA-N	O=C(O)CC1C(=O)OC2C3OC(OC(=O)C4=CC(O)=C(O)C(O)=C4)C(OC(=O)C5=CC(O)=C(O)C=6OC(=O)C(O)C1C65)C2OC(=O)C7=CC(O)=C(O)C(O)=C7C=8C(O)=C(O)C(O)=CC8C(=O)OC3	0.097079	7.33e-07	0.32788	0.0025809	0.0076619	1.83e-13	2.00834	1.73807	1.8325	1	0.951389	1
40	Positive	0.178	398.27	no MS2: Phytosphingosine-1-P	[M+H]+	C18H40NO6P	Phosphosphingolipids	AYGOSKULTISFCW-KZNAEPCWSA-N	CCCCCCCCCCCCCC[C@H]([C@@H]([C@@H](COP(=O)(O)O)N)O)O	0.12893	5.62e-07	0.37892	0.0029763	0.04193	3.67e-13	1.89237	1.61374	1.84223	1	0.909722	1
41	Positive	9.038	241.197	low score: h_14_19_norandrosterone	[M-2H2O+H]+	C18H28O2	Estrogens and derivatives	UOUIARGWRPHDBX-CQZDKXCPSA-N	O[C@@H]1CC[C@@]2([H])[C@](CC[C@]3([H])[C@]2([H])CC[C@@]4(C)[C@@]3([H])CCC4=O)([H])C1	0.2202	1.94e-06	0.4059	0.0018405	0.096888	3.95e-13	1.9363	1.72283	1.75257	0.97917	0.930556	1
42	Positive	8.677	478.335	low score: N-(4-((6aR,8aS)-4-hydroxy-6a,8a,9-trimethyl-3,4,5,6,6a,6b,7,8,8a,8b,11a,12,12a,12b-tetradecahydro-1H-naphtho[2',1':4,5]indeno[2,1-b]furan-10-yl)-2-methylbutyl)acetamide	[M+Na]+	C29H45NO3	Furostanes and derivatives	CNHACNVJEKRLHF-UDCIVARJSA-N	O=C(NCC(C)CCC=1OC2CC3C4CC=C5CC(O)CCC5(C)C4CCC3(C)C2C1C)C	0.21418	7.95e-06	0.36256	0.0026988	0.044644	4.55e-13	1.82189	1.42643	1.83001	0.93056	0.930556	1
43	Positive	8.348	288.279	low score: C17-Sphinganine	[M+H]+	C17H37NO2	1,2-aminoalcohols	KFQUQCFJDMSIJF-UHFFFAOYSA-N	CCCCCCCCCCCCCCC(C(CO)N)O	0.12324	6.79e-07	0.44083	0.0059155	0.029026	4.78e-13	1.84642	1.5674	1.75183	1	0.833333	1
44	Positive	19.816	955.656	low score: (30E,34E)-2,6,10,14,18,22,26,30,34-nonamethyl-36-[(2R,3R,4S,5S,6R)-3,4,5-trihydroxy-6-(hydroxymethyl)oxan-2-yl]oxyhexatriaconta-2,30,34-triene-6,10,14,18,22,26,27-heptol	[M+K]+	C51H96O13	Polyterpenoids	MONOOAYGIBRELN-REQVTYDXSA-N	OCC1OC(OCC=C(C)CCC=C(C)CCC(O)C(O)(C)CCCC(O)(C)CCCC(O)(C)CCCC(O)(C)CCCC(O)(C)CCCC(O)(C)CCC=C(C)C)C(O)C(O)C1O	0.12513	5.81e-06	0.1442	9.42e-05	0.0033294	6.82e-13	1.80018	1.9314	1.80922	1	1	1
45	Positive	13.018	443.33	low score: Paxisterol_120160	[M+H]+	C28H42O4	Ergostane steroids	WUKYEOQJBJKFPH-VHCNFDLSSA-N	O[C@H]1CC[C@@]2(C)[C@](C[C@H]3[C@]4(O3)[C@]2([H])CCC56[C@@]4([H])[C@H]7CC5[C@@](CCC(C(C)C)=C)(C)O[C@]6([H])O7)([H])C1	0.18652	4.12e-06	0.46171	0.0078539	0.037649	7.67e-13	2.01579	1.55901	1.89218	0.97917	0.909722	1
46	Positive	8.024	268.178	low score: brevicarine	[M+H]+	C17H21N3	Harmala alkaloids	OMGIBPZQATWNBX-UHFFFAOYSA-N	N=1C=C(C=2C=3C=CC=CC3NC2C1C)CCCCNC	0.14839	1.94e-06	0.43891	0.0059768	0.037557	2.14e-12	2.09055	1.71748	1.84357	1	0.868056	1
47	Positive	15.513	397.305	low score: Unknown (carbon number 27); PlaSMA ID-2179	[M+H]+	C27H40O2	Unknown	null	null	0.15313	5.61e-06	0.38864	0.0052302	0.012472	3.02e-12	1.75297	1.54883	1.64434	0.95833	0.916667	1
48	Positive	8.31	318.307	low score: Phytosphingosine (not validated, isomer of 1696)	[M+H]+	C18H39NO3	1,3-aminoalcohols	AERBNCYCJBRYDG-UHFFFAOYSA-N	OCC(N)C(O)C(O)CCCCCCCCCCCCCC	0.15414	3.77e-06	0.38339	0.0031963	0.032122	3.06e-12	1.742	1.70541	1.82588	1	0.833333	1
49	Positive	13.479	325.235	low score: GLYCEROL-MYRISTATE	[M+Na]+	C17H34O4	1-monoacylglycerols	DCBSHORRWZKAKO-UHFFFAOYSA-N	CCCCCCCCCCCCCC(=O)OCC(CO)O	0.22089	2.83e-05	0.40624	0.004978	0.023671	3.78e-12	1.92831	1.79089	1.96548	0.84028	0.868056	1
50	Positive	9.24	527.37	low score: Dehydropachymic acid	[M+H]+	C33H50O5	Triterpenoids	RWIALJIVPUCERT-DRCQUEPLSA-N	O=C(OC1CCC2(C3=CCC4(C)C(C(O)CC4(C3=CCC2C1(C)C)C)C(C(=O)O)CCC(=C)C(C)C)C)C	0.20843	5.35e-07	0.37487	0.00082351	0.098177	4.64e-12	1.75203	1.76786	1.63374	0.97917	0.861111	1
51	Positive	9.1	317.146	no MS2: Loureirin B	[M+H]+	C18H20O5	Retro-dihydrochalcones	ZPFRAPVRYLGYEC-UHFFFAOYSA-N	O=C(C1=CC=C(O)C=C1)CCC=2C(OC)=CC(OC)=CC2OC	0.2113	1.03e-06	0.31233	2.31e-05	0.11145	4.68e-12	1.83339	2.06991	1.82135	1	1	1
52	Positive	8.691	502.335	low score: (2R,3S,4S,5S,6R)-2-[[7-hydroxy-4-[(Z)-5-hydroxy-3-methylpent-3-enyl]-4a,8,8-trimethyl-3-methylidene-2,4,5,6,7,8a-hexahydro-1H-naphthalen-2-yl]oxy]-6-(hydroxymethyl)oxane-3,4,5-triol	[M+NH4]+	C26H44O8	Diterpene glycosides	JECOCDKQCZSANH-RFKAOMIISA-N	OCC=C(C)CCC1C(=C)C(OC2OC(CO)C(O)C(O)C2O)CC3C(C)(C)C(O)CCC13C	0.14224	6.17e-07	0.42832	0.0067686	0.046594	5.14e-12	1.90144	1.46766	1.76091	0.97917	0.840278	1
53	Positive	10.272	399.286	low score: Geranylgeranyl 1,4-hydroquinone	[M+H]+	C26H38O3	Diterpenoids	MYSSQNMFYDHCAT-FLPKSHQQSA-N	OC1=C(C/C=C(CC/C=C(C)/CC/C=C(C)/CC/C=C(C)\C)\C)C=C(O)C=C1O	0.29965	1.1e-06	0.41511	0.00031743	0.1806	8.5e-12	1.71439	1.71672	1.54439	1	0.951389	1
54	Positive	13.791	374.361	low score: Conessine	[M+NH4]+	C24H40N2	Conanine-type alkaloids	GPLGAQQQNWMVMM-MYAJQUOBSA-N	C1=C2CC(N(C)C)CCC2(C)C3CCC45CN(C)C(C)C5CCC4C3C1	0.1164	2.26e-06	0.36518	0.0047515	0.0036394	9.68e-12	1.95282	1.59259	1.84839	0.97222	0.902778	1
55	Positive	5.531	297.097	no MS2: OCP_297.1002_16.5	[M+H]+	C14H17ClN2O3	Phenylpiperazines	FMKKWAHJJLLAOW-UHFFFAOYSA-N	OC(=O)CCC(=O)N1CCN(CC1)c1ccccc1Cl	5.3265	2.14e-07	4.3861	0.0016162	5.9268	1.14e-11	1.87952	1.87159	1.72175	1	0.847222	1
56	Positive	10.311	365.169	low score: 7,8-Dihydroxy calonectrin	[M+Na]+	C19H26O8	Trichothecenes	JSKXQQKSUOVSKS-UHFFFAOYSA-N	CC1=CC2C(C(C1O)O)(C3(CC(C(C34CO4)O2)OC(=O)C)C)COC(=O)C	0.082932	2.48e-08	0.28498	0.00042286	0.046475	1.3e-11	1.94086	2.02476	1.78443	1	0.930556	1
57	Positive	13.352	369.273	low score: Dihydromuronic acid	[M+K]+	C21H36O5	Gamma butyrolactones	SPGPUDJMXMJNCU-JLAWEPINSA-N	CC(=O)CCCCCCCCCCCCC[C@@H]1C(C(C)C(=O)O1)C(=O)O	0.16231	7.53e-06	0.32319	0.0019409	0.017517	1.65e-11	1.75991	1.59847	1.66239	0.9375	0.916667	1
58	Positive	14.46	122.105	no MS2: 2,6-Xylidine	[M+H]+	C8H11N	m-Xylenes	UFFBMTHBGFGIHF-UHFFFAOYSA-N	CC1=CC=CC(C)=C1N	13.245	2.81e-06	14.819	0.009567	14.551	1.86e-11	1.99722	1.38879	1.71275	1	0.881944	1
59	Positive	12.3	427.342	low score: 5Alpha-Cholestanol	[M+K]+	C27H48O	Cholesterols and derivatives	QYIXCDOBOSTCEI-QCYZZNICSA-N	OC1CCC2(C)C(CCC3C4CCC(C(C)CCCC(C)C)C4(C)CCC32)C1	0.14862	5.44e-06	0.39617	0.0058011	0.0108	2.08e-11	1.99345	1.65118	1.87024	0.97222	0.840278	1
60	Positive	13.014	233.139	low score: 3-(sec-butyl)-2-hydroxy-3H-benzo[e][1,4]diazepin-5(4H)-one	[M+H]+	C13H16N2O2	1,4-benzodiazepines	VKZICKDDJSFAAG-UHFFFAOYSA-N	O=C1NC(C(O)=NC=2C=CC=CC12)C(C)CC	0.19645	7.89e-06	0.46714	0.0081133	0.054546	2.28e-11	1.79572	1.57333	1.69599	1	0.875	1
61	Positive	9.065	570.407	low score: "(4R)-4-((3R,5S,7R,9S,10S,13R,14S,17R)-3,7-dihydroxy-10,13-dimethylhexadecahydro-1H-cyclopenta[a]phenanthren-17-yl)-N-methyl-N-((2S,3R,4R,5R)-2,3,4,5,6-pentahydroxyhexyl)pentanamide"	[M+H]+	C31H55NO8	Dihydroxy bile acids, alcohols and derivatives	KUXSAFRZQPYINU-SGWAQUIASA-N	C[C@H](CCC(N(C)C[C@H](O)[C@@H](O)[C@@H]([C@@H](CO)O)O)=O)[C@H]1CC[C@H]2[C@]3([H])[C@H](O)C[C@@H]4C[C@H](O)CC[C@]4(C)[C@H]3CC[C@@]21C	0.12556	5.67e-07	0.44995	0.0065523	0.025012	2.49e-11	1.87204	1.36533	1.59593	0.98611	0.805556	1
62	Positive	9.268	534.345	low score: Orlistat	[M+K]+	C29H53NO5	Leucine and derivatives	AHLBNYSZXLDEJQ-FWEHEUNISA-N	CCCCCCCCCCC[C@H](OC([C@@H](NC=O)CC(C)C)=O)C[C@H]1[C@H](CCCCCC)C(O1)=O	0.25632	3.52e-05	0.4394	0.0050671	0.069111	2.59e-11	1.70718	1.57652	1.75619	0.94097	0.944444	1
63	Positive	12.376	245.249	low score: N1-Acetylspermine	[M+H]+	C12H28N4O	Acetamides	GUNURVWAJRRUAV-UHFFFAOYSA-N	NCCCNCCCCNCCCNC(C)=O	0.11592	1.95e-06	0.24389	0.00070183	0.00982	2.77e-11	1.78256	1.79646	1.74196	0.97222	0.944444	1
64	Positive	13.791	357.332	low score: conessine	[M+H]+	C24H40N2	Conanine-type alkaloids	GPLGAQQQNWMVMM-CYFNKAHPSA-N	C1=C2CC(N(C)C)CCC2(C)C3CCC45CN(C)C(C)C5CCC4C3C1	0.11893	2.5e-06	0.38679	0.0062059	0.0055899	2.83e-11	2.00529	1.62683	1.87986	0.97222	0.888889	1
65	Positive	9.053	302.172	low score: Dobutamine	[M+H]+	C18H23NO3	Catecholamines and derivatives	JRWZLRBJNMZMFE-UHFFFAOYSA-N	[H]Oc(c([H])2)c([H])c([H])c(c([H])2)C([H])([H])C([H])([H])C([H])(C([H])([H])[H])N([H])C([H])([H])C([H])([H])c(c([H])1)c([H])c(O[H])c(O[H])c([H])1	0.30257	1.68e-06	0.41604	6.32e-05	0.2182	3.11e-11	1.70627	1.76745	1.65912	0.99306	0.993056	1
66	Positive	17.776	376.331	low score: N-(3-Methoxybenzyl)palmitamide	[M+H]+	C24H41NO2	Anisoles	FIQGQTITXPTKIY-UHFFFAOYSA-N	O=C(NCC=1C=CC=C(OC)C1)CCCCCCCCCCCCCCC	0.17101	9.42e-06	0.40786	0.0061399	0.022865	3.69e-11	1.81679	1.54923	1.65818	0.98611	0.868056	1
67	Positive	10.308	388.248	low score: (1r,5R,7S)-5,7-diethyl-2-(1-ethyl-2-methyl-1H-indol-3-yl)-1,3-diazaadamantan-6-one	[M+Na]+	C23H31N3O	N-alkylindoles	KRYFHYSXWHRZKT-BRTIRZTQSA-N	O=C1C2(CN3CC1(CN(C2)C3C=4C=5C=CC=CC5N(C4C)CC)CC)CC	0.080184	1.18e-07	0.3432	0.0018152	0.033709	3.98e-11	2.14379	1.82335	1.86853	1	0.833333	1
68	Positive	9.513	317.147	no MS2: Loureirin B	[M+H]+	C18H20O5	Retro-dihydrochalcones	ZPFRAPVRYLGYEC-UHFFFAOYSA-N	O=C(C1=CC=C(O)C=C1)CCC=2C(OC)=CC(OC)=CC2OC	0.17308	2.24e-07	0.29253	8.46e-06	0.10883	5.1e-11	1.88501	1.92245	1.71437	1	1	1
69	Positive	9.264	518.357	low score: "Orlistat (Alli, Xenical)"	[M+Na]+	C29H53NO5	Leucine and derivatives	AHLBNYSZXLDEJQ-FWEHEUNISA-N	C1([C@H]([C@@H](O1)C[C@H](CCCCCCCCCCC)OC(=O)[C@H](CC(C)C)NC(=O)[H])CCCCCC)=O	0.22945	1.04e-05	0.48105	0.0046803	0.073386	7.21e-11	1.62197	1.67143	1.62456	0.9375	0.923611	1
70	Positive	10.082	576.464	no MS2: Ceramide (d18:1/16:0)	[M+K]+	C34H67NO3	Ceramides	YDNKGFDKKRUKPY-TURZORIXSA-N	CCCCCCCCCCCCCCCC(=O)N[C@@H](CO)[C@@H](/C=C/CCCCCCCCCCCCC)O	0.16409	1e-05	0.34529	0.0030678	0.020224	7.99e-11	1.55977	1.42417	1.62636	0.94444	0.875	1
71	Positive	12.433	374.338	low score: N-Benzylstearamide	[M+H]+	C25H43NO	N-acyl amines	IXODJGLAVBPVSW-UHFFFAOYSA-N	O=C(NCC=1C=CC=CC1)CCCCCCCCCCCCCCCCC	0.16136	3.75e-06	0.33674	0.0017521	0.040177	1.08e-10	1.90076	1.63137	1.77036	0.98611	0.951389	1
72	Positive	13.79	379.315	low score: conessine	[M+Na]+	C24H40N2	Conanine-type alkaloids	GPLGAQQQNWMVMM-CYFNKAHPSA-N	C1=C2CC(N(C)C)CCC2(C)C3CCC45CN(C)C(C)C5CCC4C3C1	0.12004	3.64e-06	0.33763	0.0037647	0.0055373	1.19e-10	2.00887	1.71553	1.85563	0.97222	0.923611	1
73	Positive	12.375	377.301	low score: "(4R)-4-((3R,5S,9S,10S,13R,14S,17R)-3-hydroxy-10,13-dimethylhexadecahydro-1H-cyclopenta[a]phenanthren-17-yl)pentanoic acid"	[M+H]+	C24H40O3	Monohydroxy bile acids, alcohols and derivatives	SMEROWZSTRWXGI-NWFSOSCSSA-N	C[C@@]12[C@](CC[C@]3([H])[C@@H]2CC[C@@]4(C)[C@H]3CC[C@@H]4[C@@H](CCC(O)=O)C)([H])C[C@H](O)CC1	0.098457	2.1e-06	0.20491	0.00063932	0.003298	1.43e-10	1.92963	1.92027	1.81531	0.97222	0.930556	1
74	Positive	11.021	317.148	low score: MMV392832	[M+H]+	C19H16N4O	Phenylpyrroles	SCLHBVYXOLVAFF-UHFFFAOYSA-N	N=1C=CC=C(C1)NC2=NC=CC=3NC(=CC23)C4=CC=CC(OC)=C4	0.15786	3.29e-07	0.30022	0.00017472	0.082	1.54e-10	1.95335	1.79907	1.76067	0.99306	0.979167	1
75	Positive	1.187	148.054	low score: L-Glutamic acid; CE0; WHUUTDBJXJRKMK-VKHMYHEASA-N	[M+H]+	C5H9NO4	Glutamic acid and derivatives	WHUUTDBJXJRKMK-VKHMYHEASA-N	C(CC(=O)O)[C@@H](C(=O)O)N	0.24132	5.36e-05	0.49507	0.01027	0.05923	1.71e-10	1.52692	1.34751	1.73719	0.97222	0.847222	1
76	Positive	8.106	542.372	low score: NCGC00381175-01!3-hydroxy-2-[[3-[3-(3-hydroxy-6-methylheptanoyl)oxy-6-methylheptanoyl]oxy-8-methylnonanoyl]amino]propanoic acid [IIN-based on: CCMSLIB00000848442]	[M-H2O+H]+	C29H53NO9	N-acyl-alpha amino acids	MWZPHNZNPKKSEI-UHFFFAOYSA-N	CC(C)CCCCC(CC(=O)NC(CO)C(O)=O)OC(=O)CC(CCC(C)C)OC(=O)CC(O)CCC(C)C	0.14014	3.33e-06	0.32501	0.0021393	0.026309	2.07e-10	1.51997	1.40407	1.55135	1	0.944444	1
77	Positive	8.753	520.438	no MS2: "2alpha-acetoxy-3beta,22alpha-stictandiol"	[M+NH4]+	C32H54O4	Sesquiterpenoids	QZWMMIGRNYLXMG-XDRJWLFLSA-N	CC1(C)C2CC[C@@]3(C)C(CCC4C3(CCC3[C@@H](O)C(C)(C)CCC43C)C)C2(C)CC(OC(=O)C)C1O	0.12136	2.24e-07	0.27607	0.00059831	0.047847	2.25e-10	1.62837	1.43679	1.47934	1	0.979167	1
78	Positive	12.376	372.344	low score: NCGC00380102-01!3-hexadecyl-4-methoxy-5-methyloxolan-2-one	[M+NH4]+	C22H42O3	Gamma butyrolactones	DJNFXUFERDZHCD-UHFFFAOYSA-N	CCCCCCCCCCCCCCCCC1C(OC)C(C)OC1=O	0.11171	2.13e-06	0.25032	0.00099651	0.0098993	2.31e-10	1.89816	1.77539	1.76664	0.97222	0.9375	1
79	Positive	18.973	537.404	low score: Lysine conjugated cholic acid	[M+H]+	C30H52N2O6	Glycinated bile acids and derivatives	FTOTVNJFGHCOCZ-UHFFFAOYSA-N	C[CH](CCC(NC(CCCCN)C(O)=O)=O)[CH]1CC[CH]2[C]3([H])[CH](O)C[C]4([H])C[CH](O)CC[C]4(C)[CH]3C[CH](O)[C]21C	0.30184	0.00020742	0.28311	0.0006385	0.044359	2.48e-10	1.37854	1.88051	1.82021	0.91667	1	1
80	Positive	13.478	298.297	low score: Tridemorph	[M+H]+	C19H39NO	Morpholines	YTOPFCCWCSOHFV-UHFFFAOYSA-N	CCCCCCCCCCCCCN(C1)CC(C)OC(C)1	0.26409	0.00012286	0.45911	0.010916	0.029329	2.93e-10	1.71301	1.54667	1.81414	0.86111	0.826389	1
81	Positive	15.522	449.325	low score: "(6R)-3-hydroxy-2-methyl-6-((3R,5S,7R,8R,9S,10S,12S,13R,14S,17R)-3,7,12-trihydroxy-10,13-dimethylhexadecahydro-1H-cyclopenta[a]phenanthren-17-yl)heptanoic acid"	[M-H2O+H]+	C27H46O6	Tetrahydroxy bile acids, alcohols and derivatives	FAYYTQMQTAKHRM-QDVPYJSNSA-N	C[C@@H]([C@H]1CC[C@]2([H])[C@]1(C)[C@@H](O)C[C@@]3([H])[C@@]2([H])[C@H](O)C[C@@]4([H])[C@]3(C)CC[C@@H](O)C4)CCC(O)C(C)C(O)=O	0.17078	8.84e-06	0.38652	0.0038893	0.036804	3.45e-10	1.71868	1.60524	1.61656	1	0.965278	1
82	Positive	14.396	471.352	low score: glycyrrhetic acid	[M+H]+	C30H46O4	Triterpenoids	MPDGHEJMBKOTSU-YKLVYJNSSA-N	O=C(O)C1(C)CCC2(C)CCC3(C(=CC(=O)C4C5(C)CCC(O)C(C)(C)C5CCC43C)C2C1)C	0.11045	1.28e-06	0.26332	0.00075655	0.031051	3.66e-10	1.84007	1.74855	1.73377	1	0.965278	1
83	Positive	9.65	560.364	low score: NCGC00381175-01!3-hydroxy-2-[[3-[3-(3-hydroxy-6-methylheptanoyl)oxy-6-methylheptanoyl]oxy-8-methylnonanoyl]amino]propanoic acid	[M+H]+	C29H53NO9	N-acyl-alpha amino acids	MWZPHNZNPKKSEI-UHFFFAOYSA-N	CC(C)CCCCC(CC(=O)NC(CO)C(O)=O)OC(=O)CC(CCC(C)C)OC(=O)CC(O)CCC(C)C	0.1829	1.21e-05	0.42234	0.0070873	0.033369	4.03e-10	1.75618	1.53143	1.76223	0.93056	0.833333	1
84	Positive	13.797	395.291	low score: Unknown (carbon number 27); PlaSMA ID-2165	[M+K]+	C27H38O2	Unknown	null	null	0.15298	1.14e-06	0.3191	0.00063932	0.059262	4.11e-10	1.90339	1.73311	1.81696	0.97222	0.930556	1
85	Positive	8.843	310.265	low score: Bentyl	[M+Na]+	C19H35NO2	Carboxylic acid esters	CURUTKGFNZGFSE-UHFFFAOYSA-N	CCN(CC)CCOC(=O)C1(CCCCC1)C2CCCCC2	0.11103	2.73e-07	0.37577	0.0029427	0.051076	4.36e-10	1.74553	1.46019	1.49582	1	0.861111	1
86	Positive	0.283	457.312	no MS2: Nakijiquinone H	[M+H]+	C26H40N4O3	Prenylquinones	UOJQVKJSJVULOG-UHFFFAOYSA-N	CC1=CCCC2C1(C)CCC(C)C2(C)CC3=C(O)C(C=C(NCCCCNC(N)=N)C3=O)=O	0.15153	1.57e-06	0.28592	0.0006385	0.045808	4.41e-10	1.92937	1.76403	1.65055	1	1	1
87	Positive	7.866	316.217	low score: "Saxagliptin (BMS-477118,Onglyza)"	[M+H]+	C18H25N3O2	Alpha amino acid amides	QGJUIPDUBHWZPV-BBIKMUCQSA-N	C1C2CC3(CC1CC(C2)(O)C3)[C@@H](C(N4[C@@H](C[C@]5([C@]4(C5)[H])[H])C#N)=O)N	0.15722	3.44e-06	0.35159	0.0019677	0.048388	4.81e-10	2.02935	1.86722	1.75519	1	0.840278	1
88	Positive	10.057	570.403	low score: "(4R)-4-((3R,5S,7R,9S,10S,13R,14S,17R)-3,7-dihydroxy-10,13-dimethylhexadecahydro-1H-cyclopenta[a]phenanthren-17-yl)-N-methyl-N-((2S,3R,4R,5R)-2,3,4,5,6-pentahydroxyhexyl)pentanamide"	[M+H]+	C31H55NO8	Dihydroxy bile acids, alcohols and derivatives	KUXSAFRZQPYINU-SGWAQUIASA-N	C[C@H](CCC(N(C)C[C@H](O)[C@@H](O)[C@@H]([C@@H](CO)O)O)=O)[C@H]1CC[C@H]2[C@]3([H])[C@H](O)C[C@@H]4C[C@H](O)CC[C@]4(C)[C@H]3CC[C@@]21C	0.16151	2.13e-06	0.49718	0.011408	0.055291	6.32e-10	1.76114	1.27185	1.62499	1	0.833333	1
89	Positive	13.698	682.421	low score: 11-hydroxy-9-(hydroxymethyl)-2-methoxycarbonyl-2,6a,6b,9,12a-pentamethyl-10-(3,4,5-trihydroxyoxan-2-yl)oxy-1,3,4,5,6,6a,7,8,8a,10,11,12,13,14b-tetradecahydropicene-4a-carboxylic acid	[M+NH4]+	C36H56O11	Triterpenoids	SFZVDNKTWPZIJG-UHFFFAOYSA-N	O=C(O)C12CCC(C(=O)OC)(C)CC2C3=CCC4C5(C)CC(O)C(OC6OCC(O)C(O)C6O)C(C)(CO)C5CCC4(C)C3(C)CC1	0.11694	2.85e-06	0.33295	0.0026712	0.022325	7.39e-10	1.91338	1.73158	1.79088	0.97222	0.895833	1
90	Positive	7.02	432.268	low score: Marineosin A	[M+Na]+	C25H35N3O2	Oxanes	JPTGQNMDWMSVSF-DUENCVSESA-N	[H][C@]12C[C@H](C)O[C@]3(N=C(C[C@H]3OC)C3=CC=CN3)[C@]1([H])C1=CC=C(CCCCCCC2)N1	9.0938	0.00042677	16.997	0.014585	10.224	8.93e-10	1.23734	1.31846	1.56825	0.90972	0.840278	1
91	Positive	10.865	614.395	low score: Edpetiline	[M+Na]+	C33H53NO8	Steroidal saponins	DHQFYEJMFMYGCV-UHFFFAOYSA-N	O=C1CC2C3CCC4C(CN5CC(C)CCC5C4(O)C)C3CC2C6(C)CCC(OC7OC(CO)C(O)C(O)C7O)CC16	0.13802	3.11e-06	0.299	0.0013054	0.03465	9.31e-10	1.93814	1.80705	1.7663	0.97222	0.916667	1
92	Positive	8.124	486.313	low score: "N-((4R)-4-((3R,5S,7S,9S,10S,13R,14S,17R)-3,7-dihydroxy-10,13-dimethylhexadecahydro-1H-cyclopenta[a]phenanthren-17-yl)pentanoyl)-N-methylglycine"	[M+H-2H2O]+	C27H45NO5	Glycinated bile acids and derivatives	YZYBIGOLMMAZFK-IMLYGNJHSA-N	C[C@H](CCC(N(CC(O)=O)C)=O)[C@H]1CC[C@H]2[C@]([C@@H]3CC[C@@]21C)([H])[C@@H](O)C[C@@]4([H])[C@]3(C)CC[C@@H](O)C4	0.17384	7.82e-06	0.42665	0.0059768	0.054235	2e-09	1.70581	1.33656	1.5901	0.98611	0.854167	1
93	Positive	8.736	592.387	no MS2: Edpetiline	[M+Na]+	C33H53NO8	Steroidal saponins	DHQFYEJMFMYGCV-UHFFFAOYSA-N	O=C1CC2C3CCC4C(CN5CC(C)CCC5C4(O)C)C3CC2C6(C)CCC(OC7OC(CO)C(O)C(O)C7O)CC16	0.31256	8.01e-07	0.36982	0.0012573	0.17412	2.06e-09	1.5403	1.42188	1.6194	1	0.923611	1
94	Positive	9.178	504.352	low score: NCGC00380972-01_C32H45N3O2_	[M+H]+	C32H45N3O2	Pyrroloindoles	IXMZEPKYPFQFJN-QNFIBVQNSA-N	CC(C)C[C@@H]1NC(=O)[C@@H]2C[C@]34C[C@@H]5[C@@]6(C)CCCC(C)(C)C6CC[C@@]5(C)N([C@H]3N2C1=O)C7=CC=CC=C47	0.20571	1.12e-06	0.38826	0.0016162	0.090084	2.25e-09	1.73073	1.55852	1.57903	0.97917	0.9375	1
95	Positive	13.351	421.289	low score: (1S,4S,5R,9S,10R,13R,14R)-14-hydroxy-5,9-dimethyl-14-{[(3-methylbutanoyl)oxy]methyl}tetracyclo[11.2.1.0?,??.0?,?]hexadecane-5-carboxylic acid	[M+H]+	C25H40O5	Kaurane diterpenoids	FIOZUJXSEZUYCS-MTSAZYMTSA-N	O=C(OCC1(O)CC23CCC4C(C(=O)O)(C)CCCC4(C)C3CCC1C2)CC(C)C	0.20719	1.42e-05	0.3199	0.0010613	0.085277	2.32e-09	1.76341	1.79728	1.68606	1	0.993056	1
96	Positive	8.696	524.317	low score: Aspartate conjugated cholic acid	[M+H]+	C28H45NO8	Glycinated bile acids and derivatives	VMFFESMCXOCOIZ-NCLBRSMESA-N	C[C@H](CCC(N[C@@H](CC(O)=O)C(O)=O)=O)[C@H]1CC[C@@]2([H])[C@]3([H])[C@H](O)C[C@]4([H])C[C@H](O)CC[C@]4(C)[C@H]3C[C@H](O)[C@@]21C	0.22271	3.23e-06	0.4474	0.004978	0.13596	3.96e-09	1.75096	1.59162	1.61079	1	0.8125	1
97	Positive	17.145	585.325	low score: lappaconitine	[M+H]+	C32H44N2O8	Lappaconitine-type diterpenoid alkaloids	NWBWCXBPKTTZNQ-GSAAXPBRSA-N	O=C(OC12CN(CC)C3C4CC1C3(C(OC)CC2)C5CC6C(OC)CC4(O)C5(O)C6OC)C=7C=CC=CC7NC(=O)C	0.093362	2.94e-06	0.3182	0.0034835	0.017544	3.96e-09	1.79488	1.64791	1.71039	0.97917	0.875	1
98	Positive	9.344	688.342	low score: Acetylaconitine	[M+H]+	C36H49NO12	Aconitane-type diterpenoid alkaloids	RIPYIJVYDYCPKW-WEVHBWGYSA-N	CCN1CC2(COC)[C@H]3C(OC)C4[C@@H]1C3([C@@H]1C[C@@]3(O)C(OC(=O)C5=CC=CC=C5)[C@@H]1[C@]4(OC(C)=O)C(O)[C@@H]3OC)C(CC2OC(C)=O)OC	0.14749	6.22e-06	0.43979	0.0081607	0.036194	4.33e-09	1.4122	1.37236	1.37846	0.98611	0.833333	1
99	Positive	14.557	136.032	Benzothiazole	[M+H]+	C7H5NS	Benzothiazoles	IOJUPLGTWVMSFF-UHFFFAOYSA-N	N1=CSC=2C=CC=CC12	3.8182	6.77e-05	2.9911	0.01059	4.5956	4.93e-09	1.5757	1.33971	1.5842	1	0.909722	1
100	Positive	11.264	375.284	low score: NCGC00380376-01_C22H40O3_1-Naphthalenepentanol, decahydro-2-hydroxy-gamma,2,5,5,8a-pentamethyl-, alpha-acetate	[M+Na]+	C22H40O3	Diterpenoids	NZKLGQRMNDHSPV-UHFFFAOYSA-N	CC(CCOC(C)=O)CCC1C(C)(O)CCC2C(C)(C)CCCC12C	0.16064	9.64e-06	0.21013	0.00028737	0.04641	5.03e-09	1.73875	1.7659	1.63423	0.97222	1	1
101	Positive	7.866	332.191	mahanimbine	[M+H]+	C23H25NO	Carbazoles	HTNVFUBCWIYPJN-QHCPKHFHSA-N	O1C=2C(C=CC1(C)CCC=C(C)C)=C3NC=4C=CC=CC4C3=CC2C	0.15878	4e-06	0.27827	0.00049834	0.073168	6.27e-09	1.63207	1.94406	1.69016	1	0.958333	1
102	Positive	8.109	564.358	low score: NCGC00381435-01!13-dodecan-2-yl-6-(1-hydroxyethyl)-3-(hydroxymethyl)-12-methyl-9-propan-2-yl-1-oxa-4,7,10-triazacyclotridecane-2,5,8,11-tetrone [IIN-based on: CCMSLIB00000848775]	[M+Na]+	C28H51N3O7	Cyclic depsipeptides	PVAWVKQDYYTSIE-UHFFFAOYSA-N	CCCCCCCCCCC(C)C1OC(=O)C(CO)NC(=O)C(NC(=O)C(NC(=O)C1C)C(C)C)C(C)O	0.17653	5.3e-06	0.29643	0.001327	0.056244	7.07e-09	1.47329	1.41796	1.38883	0.98611	0.930556	1
103	Positive	9.663	612.381	low score: NCGC00384824-01!methyl 3-hydroxy-2-[[3-hydroxy-2-[[2-[(3-hydroxy-2,4-dimethyltetradecanoyl)amino]-3-methylbutanoyl]amino]butanoyl]amino]propanoate [IIN-based on: CCMSLIB00000848076]	[M+K]+	C29H55N3O8	Peptides	AKMKWHBDPUOPSK-UHFFFAOYSA-N	CCCCCCCCCCC(C)C(O)C(C)C(=O)NC(C(C)C)C(=O)NC(C(C)O)C(=O)NC(CO)C(=O)OC	0.13794	3.24e-06	0.37732	0.0038482	0.048828	7.77e-09	1.7951	1.64222	1.69398	1	0.861111	1
104	Positive	2.257	100.075	N-Methyl-2-pyrrolidone	[M+H]+	C5H9NO	N-alkylpyrrolidines	SECXISVLQFMRJM-UHFFFAOYSA-N	CN1CCCC1=O	12.647	5.38e-06	9.5192	0.0066494	14.53	7.93e-09	1.92637	1.62614	1.69427	1	0.878472	1
105	Positive	0.793	201.022	low score: Meglutol	[M+K]+	C6H10O5	Hydroxy fatty acids	NPOAOTPXWNWTSH-UHFFFAOYSA-N	O=C(O)CC(O)(C)CC(=O)O	6.263	4.94e-06	12.133	0.0073719	5.3313	8.83e-09	1.4258	1.18642	1.42056	1	0.895833	1
106	Positive	12.221	396.345	low score: N-Oleyl-Leucine	[M+H]+	C24H45NO3	Leucine and derivatives	UMOAAMQGRRCHPA-GJCOWUBNSA-N	CCCCCCCC/C=C\CCCCCCCC(=O)N[C@@H](CC(C)C)C(=O)O	0.1281	3.68e-06	0.23422	0.0004028	0.045118	1.07e-08	1.58349	1.65053	1.4764	0.99306	0.958333	1
107	Positive	12.979	313.298	low score: icosanoic acid	[M+H-H2O]+	C20H40O2	Long-chain fatty acids	VKOBVWXKNCXXDE-UHFFFAOYSA-N	O=C(O)CCCCCCCCCCCCCCCCCCC	0.25201	3.79e-05	0.43368	0.0044577	0.097118	1.14e-08	1.567	1.60822	1.65079	0.86111	0.868056	1
108	Positive	11.001	388.247	low score: (1r,5R,7S)-5,7-diethyl-2-(1-ethyl-2-methyl-1H-indol-3-yl)-1,3-diazaadamantan-6-one	[M+Na]+	C23H31N3O	N-alkylindoles	KRYFHYSXWHRZKT-BRTIRZTQSA-N	O=C1C2(CN3CC1(CN(C2)C3C=4C=5C=CC=CC5N(C4C)CC)CC)CC	0.14778	2.33e-06	0.4204	0.0048485	0.072755	1.2e-08	2.03186	1.58214	1.67968	1	0.833333	1
109	Positive	8.125	453.21	low score: NCGC00384740-01_C21H34O9_2(1H)-Azulenone, 6-(beta-D-glucopyranosyloxy)-4,5,6,7,8,8a-hexahydro-5-hydroxy-5-(1-hydroxy-1-methylethyl)-3,8-dimethyl-	[M+Na]+	C21H34O9	Terpene glycosides	HVAVGMDRUJHUOH-UURFWDJCSA-N	CC1CC(O[C@@H]2O[C@H](CO)[C@@H](O)[C@H](O)[C@H]2O)C(O)(CC/3=C(C)/C(=O)CC13)C(C)(C)O	0.11942	8.95e-06	0.28384	0.0026657	0.012384	1.33e-08	1.72346	1.5835	1.64456	0.95833	0.881944	1
110	Positive	12.599	171.109	no MS2: Levetiracetam	[M+H]+	C8H14N2O2	Alpha amino acids and derivatives	HPHUVLMMVZITSG-LURJTMIESA-N	O=C1N(CCC1)C(C(=N)O)CC	13.685	3.44e-05	22.312	0.0096839	15.746	1.37e-08	1.90589	1.35456	1.60715	0.97917	0.847222	1
111	Positive	10.311	343.188	low score: 9-phenyl-1-(2,4,6-trihydroxyphenyl)nonan-1-one	[M+H]+	C21H26O4	Alkyl-phenylketones	OOGZWXIAHJKVAH-UHFFFAOYSA-N	O=C(C=1C(O)=CC(O)=CC1O)CCCCCCCCC=2C=CC=CC2	0.16012	2.73e-07	0.35871	0.00073031	0.11901	1.37e-08	1.89197	1.83425	1.61234	1	0.861111	1
112	Positive	13.021	403.317	low score: "(3R,7R,8R,9S,10S,12S,13R,14S,17R)-17-((2R,5R)-5,7-dihydroxyheptan-2-yl)-10,13-dimethylhexadecahydro-1H-cyclopenta[a]phenanthrene-3,7,12-triol"	[M-2H2O+H]+	C26H46O5	Tetrahydroxy bile acids, alcohols and derivatives	PBXYLMVLLSYZLN-LQHTUWPVSA-N	O[C@@H](C1)CC[C@@]2(C)C1([H])C[C@@H](O)[C@]3([H])[C@]2([H])C[C@H](O)[C@@]4(C)[C@@]3([H])CC[C@@]4([C@H](C)CC[C@@H](O)CCO)[H]	0.20085	3.29e-05	0.20863	0.00015234	0.071673	1.37e-08	1.62648	1.81418	1.59417	0.97917	0.979167	1
113	Positive	8.69	606.348	low score: NCGC00386085-01_C32H44O10_	[M+NH4]+	C32H44O10	Oxepanes	MPCIDUFOTGXABA-UHFFFAOYSA-N	CC1OC\23C/4=C(/C(O)C5C(C)(CCC6OC(CC(OC(C)=O)C56C)C(C)(C)O)O4)C(=O)\C=C2C(C)C(OC(C)=O)C13C	0.17087	7.76e-06	0.27884	0.00083491	0.060965	1.7e-08	1.76061	1.90906	1.59769	0.97222	0.930556	1
114	Positive	12.98	331.31	low score: MMV687273	[M+H]+	C22H38N2	Monoterpenoids	JFIBVDBTCDTBRH-IDUWFGFVSA-N	C(=C(C)C)CCC(=CCNCCNC1C2CC3CC(C2)CC1C3)C	0.28455	7.6e-05	0.43882	0.005652	0.096421	1.71e-08	1.74921	1.63013	1.56382	0.83333	0.854167	1
115	Positive	17.947	409.369	low score: cholest-5-en-3-ol	[M+Na]+	C27H46O	Cholesterols and derivatives	HVYWMOMLDIMFJA-RQOOZVDESA-N	OC1CC2=CCC3C(CCC4(C)C(CCC34)C(C)CCCC(C)C)C2(C)CC1	0.20928	5.4e-05	0.38928	0.0061399	0.047183	1.75e-08	1.61655	1.42993	1.53425	0.92361	0.854167	1
116	Positive	10.492	606.33	low score: NCGC00386085-01_C32H44O10_	[M+NH4]+	C32H44O10	Oxepanes	MPCIDUFOTGXABA-UHFFFAOYSA-N	CC1OC\23C/4=C(/C(O)C5C(C)(CCC6OC(CC(OC(C)=O)C56C)C(C)(C)O)O4)C(=O)\C=C2C(C)C(OC(C)=O)C13C	44.668	2.16e-05	63.096	0.0089724	44.091	1.81e-08	1.80878	1.55918	1.61737	0.92361	0.871528	1
117	Positive	7.809	603.35	low score: Canthaxanthin (Euglenanone)	[M+K]+	C40H52O2	Xanthophylls	FDSDTBUPSURDBL-DKLMTRRASA-N	O=C1C(=C(C=CC(=CC=CC(=CC=CC=C(C=CC=C(C=CC2=C(C(=O)CCC2(C)C)C)C)C)C)C)C(C)(C)CC1)C	0.14515	2.51e-06	0.30191	0.0011746	0.065952	2.01e-08	1.84441	1.84683	1.63756	1	0.965278	1
118	Positive	9.114	223.079	low score: Cystathionine	[M+H]+	C7H14N2O4S	L-cysteine-S-conjugates	ILRYLPWNYFXEMH-WHFBIAKZSA-N	OC(=O)[C@@H](N)CCSC[C@@H](N)C(O)=O	5.4657	4.03e-05	5.5723	0.0094993	6.5084	2.26e-08	1.76852	1.44923	1.70053	0.95139	0.833333	1
119	Positive	6.596	463.281	low score: Methyl-mappain	[M+H]+	C30H38O4	Stilbenes	MRXGJOGASBBDTM-FVFOHYRDSA-N	C/C(C)=C\CC/C(C)=C/CC1=C(C(OC)=CC(/C=C/C2=CC(O)=C(C(O)=C2)C/C=C(C)\C)=C1)O	8.7018	6.6e-05	15.419	0.013182	5.9549	2.93e-08	1.25217	1.1532	1.46802	0.94444	0.833333	1
120	Positive	13.417	421.284	low score: Cholest-4,6-Dien-3-One	[M+K]+	C27H42O	Cholesterols and derivatives	XIWMRKFKSRYSIJ-GYKMGIIDSA-N	O=C1C=C2C=CC3C(CCC4(C)C3CCC4C(C)CCCC(C)C)C2(C)CC1	0.31784	0.0002089	0.42759	0.0035566	0.10307	2.95e-08	1.67298	1.7082	1.58082	0.90278	0.868056	1
121	Positive	1.273	239.035	low score: 4-methoxy-7H-furo[3,2-g]chromen-7-one	[M+Na]+	C12H8O4	5-methoxypsoralens	BGEBZHIAGXMEMV-UHFFFAOYSA-N	O=C1OC=2C=C3OC=CC3=C(OC)C2C=C1	47.006	0.0013271	91.348	0.013182	49.542	3.04e-08	1.41833	1.45348	1.63079	0.86806	0.868056	1
122	Positive	10.77	426.393	low score: N-Octanoylsphingosine,D-erythro	[M+H]+	C26H51NO3	Ceramides	APDLCSPGWPLYEQ-WRBRXSDHSA-N	CCCCCCCCCCCCCC=CC(C(CO)NC(=O)CCCCCCC)O	0.15196	1.05e-05	0.26997	0.0015668	0.058422	3.48e-08	1.46709	1.44576	1.47735	0.95139	0.888889	1
123	Positive	11.332	325.267	low score: NCGC00180676-03_C20H36O3_1-Naphthalenepentanoic acid, decahydro-2-hydroxy-beta,2,5,5,8a-pentamethyl-, (betaS,1R,2R,8aS)-	[M+H]+	C20H36O3	Diterpenoids	KHCCSRVJJDOANA-ZOSGAXDSSA-N	C[C@@H](CC[C@H]1[C@](C)(O)CCC2C(C)(C)CCC[C@]12C)CC(O)=O	0.16189	1.41e-05	0.28359	0.001367	0.049926	3.86e-08	1.52922	1.52448	1.46693	0.94444	0.909722	1
124	Positive	12.085	377.3	low score: "(4R)-4-((3R,5S,9S,10S,13R,14S,17R)-3-hydroxy-10,13-dimethylhexadecahydro-1H-cyclopenta[a]phenanthren-17-yl)pentanoic acid"	[M+H]+	C24H40O3	Monohydroxy bile acids, alcohols and derivatives	SMEROWZSTRWXGI-NWFSOSCSSA-N	C[C@@]12[C@](CC[C@]3([H])[C@@H]2CC[C@@]4(C)[C@H]3CC[C@@H]4[C@@H](CCC(O)=O)C)([H])C[C@H](O)CC1	0.14172	6.95e-06	0.23119	0.00053985	0.05878	5.37e-08	1.65109	1.8042	1.5606	0.95833	0.930556	1
125	Positive	12.298	443.314	low score: Unknown (carbon number 20); PlaSMA ID-2430	[M+H]+	C20H38N6O5	Unknown	null	null	0.15141	4.09e-06	0.24939	0.00049834	0.078615	6.3e-08	1.87997	1.82845	1.64929	0.97222	0.9375	1
126	Positive	8.75	412.246	1-Decanoyl-2-hydroxy-sn-glycero-3-phosphocholine	[M]+	C18H39NO7P	1-acyl-sn-glycero-3-phosphocholines	SECPDKKEUKDCPG-QGZVFWFLSA-O	CCCCCCCCCC(=O)OCC(O)COP(O)(=O)OCC[N+1](C)(C)C	0.28732	3.81e-05	0.32496	0.00056584	0.12843	7.12e-08	1.63306	1.94765	1.60853	0.97222	0.9375	1
127	Positive	10.496	646.327	Aconitine	[M+H]+	C34H47NO11	Aconitane-type diterpenoid alkaloids	XFSBVAOIAHNAPC-HLBYDYOGSA-N	O=C(OC1C2C3CC1(O)C(OC)C(O)C2(OC(=O)C)C4C(OC)C5C6(COC)CN(CC)C4C35C(OC)CC6O)C=7C=CC=CC7	61.715	0.0001312	122.07	0.011845	70.528	7.64e-08	1.58775	1.47744	1.6551	0.94444	0.840278	1
128	Positive	8.12	867.446	low score: Ferintoic acid A	[M+H]+	C46H58N8O9	Oligopeptides	ZATXZWLJJMKQDB-AOWMEVDFSA-N	CC(C)[C@@H]1NC(=O)[C@@H](CCCCNC(=O)[C@H](CC2=CC=CC=C2)NC(=O)[C@H](C)N(C)C(=O)[C@H](CCC2=CC=C(O)C=C2)NC1=O)NC(=O)NC(CC1=CNC2=C1C=CC=C2)C(O)=O	0.077703	7.34e-06	0.18245	0.0013507	0.002741	8.34e-08	1.66269	1.68321	1.66583	0.96528	0.888889	1
129	Positive	7.802	281.159	low score: (5R)-trans-1,7-diphenyl-5-hydroxy-6-hepten-3-one	[M+H]+	C19H20O2	Linear diarylheptanoids	NEQGOKAKPXXESR-YLZCUGDYSA-N	O=C(CCC=1C=CC=CC1)CC(O)C=CC=2C=CC=CC2	7.6581	2.73e-05	17.29	0.015071	13.723	8.57e-08	1.48677	1.31564	1.51088	0.92361	0.930556	1
130	Positive	10.494	618.313	low score: NCGC00385653-01_C36H40O8_	[M+NH4]+	C36H40O8	Jatrophane and cyclojatrophane diterpenoids	IBMKFRJIFFORNR-LAZXBOAMSA-N	CC1CC2(OC(C)=O)C(\C=C(C)/C(CC(=O)C(C)(C)/C=C/C(C)C2=O)OC(=O)C3=CC=CC=C3)C1OC(=O)C4=CC=CC=C4	174.12	5.34e-05	246.54	0.010967	171.47	1.02e-07	1.67173	1.41524	1.6302	0.94444	0.822917	1
131	Positive	9.622	100.083	N-Methyl-2-pyrrolidone	[M+H]+	C5H9NO	N-alkylpyrrolidines	SECXISVLQFMRJM-UHFFFAOYSA-N	CN1CCCC1=O	16.297	7.22e-05	13.216	0.011382	20.569	1.07e-07	1.72048	1.5264	1.69617	0.95139	0.805556	1
132	Positive	17.51	648.599	low score: Solanesol_major	[M+NH4]+	C45H74O	Polyprenols	AFPLNGZPBSKHHQ-MEGGAXOGSA-N	CC(C)=CCCC(C)=CCCC(C)=CCCC(C)=CCCC(C)=CCCC(C)=CCCC(C)=CCCC(C)=CCCC(C)=CCO	0.17668	1.2e-05	0.32893	0.0014649	0.092873	1.07e-07	1.81714	1.82767	1.6605	1	0.909722	1
133	Positive	8.791	610.367	low score: NCGC00386067-01!2-[2-(19-acetamido-16,18-dihydroxy-5,9-dimethyl-6-oxoicosan-7-yl)oxy-2-oxoethyl]butanedioic acid [IIN-based on: CCMSLIB00000846988]	[M+Na]+	C30H53NO10	Tricarboxylic acids and derivatives	CYKDMNNWBMLNSF-UHFFFAOYSA-N	CCCCC(C)C(=O)C(CC(C)CCCCCCC(O)CC(O)C(C)NC(C)=O)OC(=O)CC(CC(O)=O)C(O)=O	0.15531	3.77e-06	0.24951	0.00028431	0.083126	1.29e-07	1.59613	1.79938	1.44942	1	0.993056	1
134	Positive	10.617	100.083	N-Methyl-2-pyrrolidone	[M+H]+	C5H9NO	N-alkylpyrrolidines	SECXISVLQFMRJM-UHFFFAOYSA-N	CN1CCCC1=O	17.24	7.3e-05	13.875	0.011433	21.198	1.34e-07	1.64267	1.51278	1.65671	0.97917	0.826389	1
135	Positive	14.335	136.032	no MS2: 2-Benzoxazolinone; CE0; ASSKVPFEZFQQNQ-UHFFFAOYSA-N	[M+H]+	C7H5NO2	Benzoxazolones	ASSKVPFEZFQQNQ-UHFFFAOYSA-N	c1ccc2c(c1)nc(O)o2	3.0241	0.00049263	2.5686	0.010401	3.8156	1.48e-07	1.56265	1.49148	1.58613	0.93056	0.840278	1
136	Positive	7.083	432.269	low score: NCGC00381130-01!methyl (2E,8E)-9-[3a-hydroxy-6,7-dimethyl-1-(2-methylpropyl)-3-oxo-2,4,7,7a-tetrahydro-1H-isoindol-4-yl]-4,5-dihydroxy-8-methylnona-2,8-dienoate [IIN-based on: CCMSLIB00000846918]	[M-H2O+H]+	C25H39NO6	Bicyclic monoterpenoids	YUXUTEAAGHFKKH-MKQCFFQWSA-N	COC(=O)\\C=C\\C(O)C(O)CC\\C(C)=C\\C1C=C(C)C(C)C2C(CC(C)C)NC(=O)C12O	9.9688	6.68e-05	16.105	0.020371	9.4883	1.52e-07	1.36452	1.26379	1.42701	0.91667	0.850694	1
137	Positive	9.112	592.277	no MS2: NCGC00347608-02_C30H38O11_7,11-Methano-2H,4H-oxireno[1,8]cycloocta[1,2-f][2]benzopyran-8-acetic acid, 4-(3-furanyl)dodecahydro-alpha,11-dihydroxy-4a,7,9,9-tetramethyl-2,13-dioxo-10-(1-oxopropoxy)-, methyl ester, (alphaR,4R,4aR,7S,8S,10S,11S,11aR,12aS)-	[M+NH4]+	C30H38O11	Limonoids	FZBGZDZLYSLJFE-MVAMGWTESA-N	CCC(=O)O[C@H]1C(C)(C)[C@H]([C@@H](O)C(=O)OC)[C@@]2(C)C3CC[C@]4(C)C(CC(=O)O[C@H]4C5=COC=C5)[C@]36O[C@@H]6[C@]1(O)C2=O	20.306	0.00012535	43.99	0.0039542	21.994	1.55e-07	1.53739	1.6096	1.58022	0.89236	0.899306	1
138	Positive	14.253	453.362	no MS2: "(3R,5R,7R,8S,9S,10S,12S,13R,14S,17R)-17-((R)-7-hydroxy-6-(hydroxymethyl)heptan-2-yl)-10,13-dimethylhexadecahydro-1H-cyclopenta[a]phenanthrene-3,7,12-triol"	[M+H]+	C27H48O5	Tetrahydroxy bile acids, alcohols and derivatives	JNMALBXXJSWZQY-JOICSPLZSA-N	C[C@@H]([C@H]1CC[C@]2([H])[C@]1(C)[C@@H](O)C[C@@]3([H])[C@]2([H])[C@H](O)C[C@]4([H])[C@]3(C)CC[C@@H](O)C4)CCCC(CO)CO	0.25002	0.00012292	0.40964	0.011182	0.08999	1.63e-07	1.37211	1.20598	1.50323	0.9375	0.833333	1
139	Positive	11.805	351.277	low score: NCGC00385006-01_C25H36O2_Dicyclopenta[a,d]cycloocten-3(3aH)-one, 7-[(2Z)-1,5-dimethyl-2,4-hexadien-1-yl]-6,6a,7,8,9,9a,10,10a-octahydro-4-(hydroxymethyl)-1,9a-dimethyl-, (4E,6aS,7R,9aR,10aS)-	[M-H2O+H]+	C25H36O2	Ophiobolane sesterterpenoids	GUXDHNIKRQCWIE-WMZUYDDLSA-N	C[C@@H](\C=C/C=C(C)C)[C@H]1CC[C@]2(C)C[C@H]\3C(C(=O)\C=C3C)\C(=C/C[C@@H]12)CO	0.28853	0.00011802	0.48044	0.0091047	0.13439	1.65e-07	1.52119	1.28904	1.4493	0.875	0.840278	1
140	Positive	9.286	100.083	N-Methyl-2-pyrrolidone	[M+H]+	C5H9NO	N-alkylpyrrolidines	SECXISVLQFMRJM-UHFFFAOYSA-N	CN1CCCC1=O	18.739	6.12e-05	15.047	0.011001	23.195	1.68e-07	1.69725	1.48574	1.66625	0.96528	0.840278	1
141	Positive	0.65	369.083	low score: ethyl 3-(2,3-dihydrobenzo[b][1,4]dioxin-6-yl)-7-hydroxy-4-oxo-4H-chromene-2-carboxylate	[M+H]+	C20H16O7	Isoflavones	NTNSKOKPJWYQGX-UHFFFAOYSA-N	O=C(OCC)C=1OC2=CC(O)=CC=C2C(=O)C1C=3C=CC=4OCCOC4C3	55.658	3.4e-05	88.748	0.0085607	51.11	1.7e-07	1.76259	1.44729	1.61558	0.9375	0.885417	1
142	Positive	6.557	419.254	low score: Ophiopogonoside A	[M+H]+	C21H38O8	Terpene glycosides	DQRUOTCFENUXKV-UHFFFAOYSA-N	OCC1OC(OC2C(CCC3(C)C(O)CCC(O)(C)C23)C(C)C)C(O)C(O)C1O	7.7772	0.00034401	23.088	0.010468	8.1943	1.74e-07	1.29418	1.26259	1.38288	0.86111	0.840278	1
143	Positive	11.062	100.083	N-Methyl-2-pyrrolidone	[M+H]+	C5H9NO	N-alkylpyrrolidines	SECXISVLQFMRJM-UHFFFAOYSA-N	CN1CCCC1=O	19.199	6.76e-05	15.299	0.0099356	24.021	1.75e-07	1.76518	1.59729	1.66577	0.98611	0.909722	1
144	Positive	14.85	136.034	no MS2: 2-Benzoxazolinone; CE0; ASSKVPFEZFQQNQ-UHFFFAOYSA-N	[M+H]+	C7H5NO2	Benzoxazolones	ASSKVPFEZFQQNQ-UHFFFAOYSA-N	c1ccc2c(c1)nc(O)o2	4.0206	0.00048011	3.2774	0.011845	4.6208	1.88e-07	1.53599	1.40503	1.54371	0.95833	0.861111	1
145	Positive	10.488	223.082	no MS2: 2-methylanthra-9,10-quinone	[M+H]+	C15H10O2	Anthraquinones	NJWGQARXZDRHCD-UHFFFAOYSA-N	O=C1C=2C=CC=CC2C(=O)C3=CC(=CC=C13)C	4.5303	0.00013863	4.7428	0.01014	5.1816	2.12e-07	1.72671	1.50419	1.57027	0.96528	0.861111	1
146	Positive	13.482	627.477	low score: NCGC00347386-02!1-methyl-2-undecylquinolin-4-one [IIN-based on: CCMSLIB00000847478]	[2M+H]+	C21H31NO	Hydroquinolones	ZLIHBZFNMQLPOT-UHFFFAOYSA-N	CCCCCCCCCCCC1=CC(=O)C2=CC=CC=C2N1C	0.33472	0.0012702	0.43699	0.017291	0.059696	2.23e-07	1.33839	1.24737	1.51931	0.84722	0.819444	1
147	Positive	0.085	100.083	no MS2: 2-Piperidone; CE0; XUWHAWMETYGRKB-UHFFFAOYSA-N	[M+H]+	C5H9NO	Piperidinones	XUWHAWMETYGRKB-UHFFFAOYSA-N	C1CCN=C(C1)O	11.77	6.01e-05	8.8448	0.010494	13.526	2.42e-07	1.76078	1.46475	1.6212	1	0.902778	1
148	Positive	14.422	367.313	low score: Batyl Alcohol	[M+Na]+	C21H44O3	Monoalkylglycerols	OGBUMNBNEWYMNJ-UHFFFAOYSA-N	OCC(O)COCCCCCCCCCCCCCCCCCC	0.35782	0.00034514	0.49596	0.0072532	0.163	2.42e-07	1.30228	1.13107	1.40436	0.875	0.826389	1
149	Positive	10.247	100.083	no MS2: 2-Piperidone; CE0; XUWHAWMETYGRKB-UHFFFAOYSA-N	[M+H]+	C5H9NO	Piperidinones	XUWHAWMETYGRKB-UHFFFAOYSA-N	C1CCN=C(C1)O	17.13	7.08e-05	13.73	0.010887	21.518	2.6e-07	1.7849	1.57445	1.70096	0.97917	0.864583	1
150	Positive	6.302	333.175	low score: Isoxaben	[M+H]+	C18H24N2O4	Dimethoxybenzenes	PMHURSZHKKJGBM-UHFFFAOYSA-N	CCC(C)(CC)C1=NOC(=C1)NC(=O)C2=C(C=CC=C2OC)OC	6.5203	3.7e-05	17.841	0.011932	6.4615	2.61e-07	1.56858	1.15182	1.45964	0.93056	0.847222	1
151	Positive	1.077	154.071	no MS2: Hypoxanthine	[M+NH4]+	C5H4N4O	Hypoxanthines	FDGQSTZJBFJUBT-UHFFFAOYSA-N	OC1=NC=NC=2NC=NC12	0.37104	1.01e-05	0.39743	5.15e-06	0.3206	2.75e-07	1.34762	1.87761	1.36861	1	1	1
152	Positive	14.306	380.14	no MS2: NCGC00384901-01_C24H17N3O2_(7Z)-7-Benzylidene-6-methyl-6,7-dihydroquinazolino[3,2-a][1,4]benzodiazepine-5,13-dione	[M+H]+	C24H17N3O2	Pyrimidodiazepines	HXDZMNFJQNZXKW-QNGOZBTKSA-N	CN1C(=O)C2=C(C=CC=C2)N3C(=O)C4=C(C=CC=C4)/N=C3/C1=C/C5=CC=CC=C5	33.122	7.85e-06	83.903	0.01059	20.718	2.77e-07	1.47232	1.33204	1.54277	0.97222	0.881944	1
153	Positive	10.178	488.402	low score: Tricaprylin (C8:0)	[M+NH4]+	C27H50O6	Triacylglycerols	VLPFTAMPNXLGLX-UHFFFAOYSA-N	CCCCCCCC(=O)OCC(COC(=O)CCCCCCC)OC(=O)CCCCCCC	0.25816	0.00013667	0.34895	0.0030463	0.10758	2.93e-07	1.53572	1.4832	1.42384	0.88889	0.868056	1
154	Positive	9.17	100.084	N-Methyl-2-pyrrolidone	[M+H]+	C5H9NO	N-alkylpyrrolidines	SECXISVLQFMRJM-UHFFFAOYSA-N	CN1CCCC1=O	15.046	9.74e-05	12.062	0.010996	19.315	3e-07	1.68368	1.53064	1.64824	0.97222	0.819444	1
155	Positive	12.183	487.397	low score: hyperin	[M+Na]+	C21H20O12	Flavonoid-3-O-glycosides	OVSQVDMCBVZWGM-DTGCRPNFSA-N	O=C1C(OC2OC(CO)C(O)C(O)C2O)=C(OC=3C=C(O)C=C(O)C13)C=4C=CC(O)=C(O)C4	8.7276	8.8e-06	21.446	0.0092499	7.7386	3.2e-07	1.56741	1.29176	1.3357	0.95833	0.819444	1
156	Positive	7.446	100.084	no MS2: 2-Piperidone; CE0; XUWHAWMETYGRKB-UHFFFAOYSA-N	[M+H]+	C5H9NO	Piperidinones	XUWHAWMETYGRKB-UHFFFAOYSA-N	C1CCN=C(C1)O	13.72	0.00010546	11.421	0.010996	17.414	3.64e-07	1.71177	1.5742	1.63486	0.96528	0.805556	1
157	Positive	7.143	100.083	no MS2: 2-Piperidone; CE0; XUWHAWMETYGRKB-UHFFFAOYSA-N	[M+H]+	C5H9NO	Piperidinones	XUWHAWMETYGRKB-UHFFFAOYSA-N	C1CCN=C(C1)O	13.796	0.00012329	11.475	0.0099356	17.437	3.68e-07	1.65439	1.55413	1.62408	0.97917	0.888889	1
158	Positive	1.051	662.793	no MS2: (NAG)(NAM)-AqKA[3-NH2-d];(3br-4)-None-KA[3-NH2-d]	[M+2H]2+	C53H89N13O26	Polypeptides	QGUYNCYMDSELNF-UHFFFAOYSA-N	CC(=O)NC1C(OC2C(CO)OC(O)C(NC(C)=O)C2OC(C)C(=O)NC(C)C(=O)NC(CCC(=O)NC(CCCCNC(=O)CC(NC(=O)C(C)NC(=O)C(N)CCCCNC(=O)CC(N)C(=O)O)C(=O)O)C(=O)NC(C)C(=O)O)C(N)=O)OC(CO)C(O)C1O	11.22	0.001456	15.04	0.022121	13	3.76e-07	1.19302	1.13851	1.73873	0.86806	0.840278	1
159	Positive	14.337	223.079	no MS2: 2-methylanthra-9,10-quinone	[M+H+Na]2+	C15H10O2	Anthraquinones	NJWGQARXZDRHCD-UHFFFAOYSA-N	O=C1C=2C=CC=CC2C(=O)C3=CC(=CC=C13)C	7.7486	0.00015568	5.3633	0.0092205	9.9601	3.79e-07	1.33015	1.53983	1.35569	0.9375	0.854167	1
160	Positive	1.942	114.093	low score: Unknown (carbon number 6); PlaSMA ID-45	[M+H]+	C6H11NO	Unknown	null	null	6.875	6.57e-05	5.8175	0.0052333	8.2927	4.22e-07	1.70948	1.72003	1.68032	1	0.951389	1
161	Positive	7.244	100.084	no MS2: 2-Piperidone; CE0; XUWHAWMETYGRKB-UHFFFAOYSA-N	[M+H]+	C5H9NO	Piperidinones	XUWHAWMETYGRKB-UHFFFAOYSA-N	C1CCN=C(C1)O	13.992	0.00011019	11.703	0.0093552	17.239	4.99e-07	1.71411	1.61562	1.64675	1	0.972222	1
162	Positive	12.931	373.238	low score: 5-(5-methoxycarbonyl-5,8a-dimethyl-2-methylidene-3,4,4a,6,7,8-hexahydro-1H-naphthalen-1-yl)-3-methylpentanoic acid	[M+2Na-H]+	C21H34O4	Diterpenoids	WTDIRAZPDUAJEB-UHFFFAOYSA-N	O=C(O)CC(C)CCC1C(=C)CCC2C(C(=O)OC)(C)CCCC12C	0.28619	0.00049527	0.46161	0.016335	0.080059	4.99e-07	1.46878	1.21165	1.64574	0.86111	0.847222	1
163	Positive	8.871	100.083	N-Methyl-2-pyrrolidone	[M+H]+	C5H9NO	N-alkylpyrrolidines	SECXISVLQFMRJM-UHFFFAOYSA-N	CN1CCCC1=O	15.289	7.3e-05	12.354	0.011258	18.328	5.16e-07	1.75429	1.52528	1.64655	0.96528	0.833333	1
164	Positive	7.969	219.063	low score: Hydroxytyrosol Acetate	[M+Na]+	C10H12O4	Tyrosols and derivatives	FGJGLFPNIZXRLV-UHFFFAOYSA-N	O=C(OCCC1=CC=C(O)C(O)=C1)C	41.479	2.36e-05	94.722	0.01022	40.316	5.71e-07	1.67837	1.47615	1.50885	0.96528	0.819444	1
165	Positive	1.293	128.994	no MS2: 3-Thiophenecarboxylic acid	[M+H]+	C5H4O2S	Thiophene carboxylic acids	YNVOMSDITJMNET-UHFFFAOYSA-N	OC(=O)c(c1)csc1	19.536	0.00078887	41.49	0.0078561	13.788	5.84e-07	1.41713	1.33582	1.38338	0.81944	0.836806	1
166	Positive	1.15	154.068	no MS2: CREATINE	[M+Na]+	C4H9N3O2	Alpha amino acids and derivatives	CVSVTCORWBXHQV-UHFFFAOYSA-N	CN(CC(O)=O)C(N)=N	0.45447	7.74e-05	0.39381	1.89e-06	0.42259	6.46e-07	1.38528	2.00045	1.35976	0.9375	1	1
167	Positive	13.784	171.11	no MS2: Levetiracetam	[M+H]+	C8H14N2O2	Alpha amino acids and derivatives	HPHUVLMMVZITSG-LURJTMIESA-N	O=C1N(CCC1)C(C(=N)O)CC	24.036	5.01e-05	39.44	0.011362	28.903	6.83e-07	1.72396	1.42644	1.55999	0.95833	0.840278	1
168	Positive	8.783	582.352	low score: NCGC00381175-01!3-hydroxy-2-[[3-[3-(3-hydroxy-6-methylheptanoyl)oxy-6-methylheptanoyl]oxy-8-methylnonanoyl]amino]propanoic acid	[M+Na]+	C29H53NO9	N-acyl-alpha amino acids	MWZPHNZNPKKSEI-UHFFFAOYSA-N	CC(C)CCCCC(CC(=O)NC(CO)C(O)=O)OC(=O)CC(CCC(C)C)OC(=O)CC(O)CCC(C)C	0.12425	7.38e-07	0.19174	4.86e-05	0.11391	7.05e-07	1.8283	2.02343	1.49914	1	1	1
169	Positive	11.628	427.333	low score: "methyl (6R,E)-2-methyl-6-((3R,5S,7R,9S,10S,12S,13R,14S,17R)-3,7,12-trihydroxy-10,13-dimethylhexadecahydro-1H-cyclopenta[a]phenanthren-17-yl)hept-2-enoate"	[M-2H2O+H]+	C28H46O5	Trihydroxy bile acids, alcohols and derivatives	SZDHRKMCESZUCV-WKGGVHHNSA-N	[H][C@@]12[C@H](O)C[C@@H]3C[C@H](O)CC[C@]3(C)[C@H]1C[C@H](O)[C@@]4(C)[C@H]2CC[C@@H]4[C@@H](CC/C=C(C)/C(OC)=O)C	14.933	1.78e-05	23.357	0.010103	11.384	8.06e-07	1.62516	1.40828	1.40497	0.95139	0.819444	1
170	Positive	6.49	488.305	low score: glycocholic acid	[M+Na]+	C26H43NO6	Glycinated bile acids and derivatives	RFDAIACWWDREDC-VKRKCYKBSA-N	C[C@H](CCC(=O)NCC(=O)O)[C@H]1CC[C@@H]2[C@@]1([C@H](C[C@H]3[C@H]2[C@@H](C[C@H]4[C@@]3(CC[C@H](C4)O)C)O)O)C	2.4043	0.00017868	2.2507	0.012613	2.3361	8.12e-07	1.29373	1.12151	1.40642	0.90278	0.819444	1
171	Positive	6.429	481.293	low score: 6-oxopristimerol	[M+H]+	C30H40O5	Phenanthrenes and derivatives	QHONUEZGTQYXKH-GOSHRYQWSA-N	OC(C(O)=C1)=C(C)C2=C1[C@@]3(C)C([C@](CC[C@]4(C)C5C[C@](C)(C(OC)=O)CC4)(C)[C@@]5(C)CC3)=CC2=O	9.9025	0.00025654	19.347	0.0069389	7.8858	9.42e-07	1.11972	1.29782	1.26981	0.93056	0.861111	1
172	Positive	7.139	219.191	low score: Tributylphosphine oxide	[M+H]+	C12H27OP	Organophosphine oxides	MNZAKDODWSQONA-UHFFFAOYSA-N	CCCCP(=O)(CCCC)CCCC	10.663	6.6e-05	10.152	0.011849	12.819	9.48e-07	1.71125	1.55588	1.6417	0.97222	0.847222	1
173	Positive	7.919	223.079	low score: Cystathionine	[M+H]+	C7H14N2O4S	L-cysteine-S-conjugates	ILRYLPWNYFXEMH-WHFBIAKZSA-N	OC(=O)[C@@H](N)CCSC[C@@H](N)C(O)=O	14.643	8.73e-05	14.968	0.0098584	17.258	9.64e-07	1.8431	1.46803	1.71436	0.98611	0.923611	1
174	Positive	18.411	223.079	no MS2: 2-methylanthra-9,10-quinone	[M+H+Na]2+	C15H10O2	Anthraquinones	NJWGQARXZDRHCD-UHFFFAOYSA-N	O=C1C=2C=CC=CC2C(=O)C3=CC(=CC=C13)C	15.358	0.00033199	14.222	0.013015	20.086	9.91e-07	1.21847	1.1749	1.51279	0.97917	0.847222	1
175	Positive	6.335	504.339	low score: glutamate conjugated chenodeoxycholic acid	[M-H2O+H]+	C29H47NO7	Glycinated bile acids and derivatives	MHOZNCAVRHAOKT-PYDJSGOHSA-N	O=C(O)CCC(N=C(O)CCC(C)C1CCC2C3C(O)CC4CC(O)CCC4(C)C3CCC12C)C(=O)O	2.3507	3.78e-05	2.408	0.011669	2.5171	1.01e-06	1.59048	1.32331	1.31873	0.98611	0.819444	1
176	Positive	6.446	331.196	low score: Carnosol	[M+H]+	C20H26O4	Diterpene lactones	XUSYGBPHQBWGAD-PJSUUKDQSA-N	O=C1OC2C3=CC(=C(O)C(O)=C3C14CCCC(C)(C)C4C2)C(C)C	5.0426	1.24e-05	11.331	0.011362	4.7419	1.06e-06	1.51045	1.16447	1.35379	0.98611	0.826389	1
177	Positive	8.538	636.276	no MS2: (NAG)(anMUR)-Aq	[M+ACN+H]+	C25H41N5O14	Dipeptides	XUEWAMZWAWHUPZ-UHFFFAOYSA-N	CC(=O)NC1C(OC2C3COC(O3)C(N)C2OC(C)C(=O)NC(C)C(=O)NC(CCC(=O)O)C(N)=O)OC(CO)C(O)C1O	7.6482	0.00012642	25.756	0.0085607	17.301	1.11e-06	1.67181	1.6007	1.48436	0.91319	0.815972	1
178	Positive	14.097	273.186	no MS2: h_92_oxabolone	[M-H2O+H]+	C18H26O3	Estrogens and derivatives	GXHBCWCMYVTJOW-DNBWYCQVSA-N	O[C@H]1CCC2C3CCC4=C(O)C(CCC4C3CC[C@@]21C)=O	6.9536	4.69e-05	7.9153	0.011411	8.5142	1.14e-06	1.57637	1.29164	1.56925	1	0.861111	1
179	Positive	6.36	100.083	no MS2: 2-Piperidone; CE0; XUWHAWMETYGRKB-UHFFFAOYSA-N	[M+H]+	C5H9NO	Piperidinones	XUWHAWMETYGRKB-UHFFFAOYSA-N	C1CCN=C(C1)O	11.088	7.99e-05	8.5764	0.0085269	13.301	1.15e-06	1.68739	1.60329	1.61303	1	0.993056	1
180	Positive	14.921	100.083	no MS2: 2-Piperidone; CE0; XUWHAWMETYGRKB-UHFFFAOYSA-N	[M+H]+	C5H9NO	Piperidinones	XUWHAWMETYGRKB-UHFFFAOYSA-N	C1CCN=C(C1)O	21.427	0.000103	15.268	0.011376	26.207	1.2e-06	1.69808	1.49976	1.60307	0.97917	0.888889	1
181	Positive	6.543	100.084	no MS2: 2-Piperidone; CE0; XUWHAWMETYGRKB-UHFFFAOYSA-N	[M+H]+	C5H9NO	Piperidinones	XUWHAWMETYGRKB-UHFFFAOYSA-N	C1CCN=C(C1)O	11.164	0.00013599	9.2759	0.0091478	13.802	1.24e-06	1.69699	1.64064	1.65628	0.96528	0.965278	1
182	Positive	6.374	400.283	low score: Nakijiquinone O	[M+H]+	C25H37NO3	Prenylquinones	FNCUIBSVSDQFCR-UHFFFAOYSA-N	CC(CNC(C(C(CC1(C)C(C)CCC2(C)C(C)=CCCC21)=C3O)=O)=CC3=O)C	7.0994	5.22e-05	6.7825	0.010654	7.9215	1.29e-06	1.60069	1.4513	1.49296	1	0.840278	1
183	Positive	6.907	100.083	no MS2: 2-Piperidone; CE0; XUWHAWMETYGRKB-UHFFFAOYSA-N	[M+H]+	C5H9NO	Piperidinones	XUWHAWMETYGRKB-UHFFFAOYSA-N	C1CCN=C(C1)O	12.215	0.00015458	10.393	0.0093762	15.724	1.41e-06	1.69643	1.57439	1.57814	0.94444	0.951389	1
184	Positive	6.496	466.295	low score: taurolithocholic acid	[M-H2O+H]+	C26H45NO5S	Taurinated bile acids and derivatives	QBYUNVOYXHFVKC-RQAFQGPPSA-N	C[C@H](CCC(=O)NCCS(=O)(=O)O)[C@H]1CC[C@@H]2[C@@]1(CC[C@H]3[C@H]2CC[C@H]4[C@@]3(CC[C@H](C4)O)C)C	33.464	0.0010685	33.741	0.0099356	18.705	1.42e-06	1.02827	1.30387	1.1646	0.89583	0.805556	1
185	Positive	8.463	504.327	low score: glutamate conjugated chenodeoxycholic acid	[M-H2O+H]+	C29H47NO7	Glycinated bile acids and derivatives	MHOZNCAVRHAOKT-PYDJSGOHSA-N	O=C(O)CCC(N=C(O)CCC(C)C1CCC2C3C(O)CC4CC(O)CCC4(C)C3CCC12C)C(=O)O	4.1539	2.35e-05	10.938	0.0010309	5.2526	1.45e-06	1.3957	1.14667	1.47563	0.98611	1	1
186	Positive	1.638	100.083	N-Methyl-2-pyrrolidone	[M+H]+	C5H9NO	N-alkylpyrrolidines	SECXISVLQFMRJM-UHFFFAOYSA-N	CN1CCCC1=O	11.007	0.00014939	8.6687	0.012574	14.267	1.48e-06	1.61825	1.48885	1.64874	0.98611	0.833333	1
187	Positive	0.551	100.083	N-Methyl-2-pyrrolidone	[M+H]+	C5H9NO	N-alkylpyrrolidines	SECXISVLQFMRJM-UHFFFAOYSA-N	CN1CCCC1=O	9.8195	0.00011019	7.3814	0.011412	11.398	1.67e-06	1.69964	1.4707	1.61571	1	0.854167	1
188	Positive	7.766	261.136	low score: Diaveridine	[M+H]+	C13H16N4O2	Dimethoxybenzenes	LDBTVAXGKYIFHO-UHFFFAOYSA-N	COC1=C(C=C(C=C1)CC2=CN=C(N=C2N)N)OC	0.33829	0.00010299	0.48988	0.0068841	0.24003	1.72e-06	1.53958	1.52001	1.46053	0.99306	0.854167	1
189	Positive	6.228	289.148	low score: PHA-00568487	[M+H]+	C16H20N2O3	Benzo-1,4-dioxanes	LUVXHMJTVXZFPD-ZDUSSCGKSA-N	O=C(N[C@H]1CN2CCC1CC2)C1=CC2=C(OCCO2)C=C1	6.3045	9.88e-06	10.946	0.010628	5.1232	2.01e-06	1.4639	1.1762	1.44822	1	0.840278	1
190	Positive	14.747	100.084	no MS2: 2-Piperidone; CE0; XUWHAWMETYGRKB-UHFFFAOYSA-N	[M+H]+	C5H9NO	Piperidinones	XUWHAWMETYGRKB-UHFFFAOYSA-N	C1CCN=C(C1)O	22.049	9.55e-05	15.663	0.012516	26.925	2.03e-06	1.69031	1.46522	1.6203	0.98611	0.885417	1
191	Positive	1.079	194.035	no MS2: Phenacylamine Hydrochloride	[M+Na]+	C8H10ClNO	Alkyl-phenylketones	CVXGFPPAIUELDV-UHFFFAOYSA-N	Cl.O=C(C=1C=CC=CC1)CN	2.8576	0.0041234	3.4802	0.018349	3.4139	2.12e-06	1.09407	1.17771	1.26777	0.82639	0.805556	1
192	Positive	1.74	100.083	N-Methyl-2-pyrrolidone	[M+H]+	C5H9NO	N-alkylpyrrolidines	SECXISVLQFMRJM-UHFFFAOYSA-N	CN1CCCC1=O	11.02	0.0001554	8.3731	0.012516	13.536	2.15e-06	1.63442	1.46756	1.66407	0.95833	0.840278	1
193	Positive	1.023	682.853	no MS2: phytic acid	[M+Na]+	C6H18O24P6	Inositol phosphates	IMQLKJBTEOYOSI-UHFFFAOYSA-N	O=P(O)(O)OC1C(OP(=O)(O)O)C(OP(=O)(O)O)C(OP(=O)(O)O)C(OP(=O)(O)O)C1OP(=O)(O)O	29.467	0.00051356	39.99	0.019163	35.383	2.26e-06	1.5157	1.2477	1.55522	0.88194	0.861111	1
194	Positive	13.089	100.083	no MS2: 2-Piperidone; CE0; XUWHAWMETYGRKB-UHFFFAOYSA-N	[M+H]+	C5H9NO	Piperidinones	XUWHAWMETYGRKB-UHFFFAOYSA-N	C1CCN=C(C1)O	25.865	0.0001158	18.296	0.012347	31.596	2.51e-06	1.74842	1.49268	1.64453	1	0.895833	1
195	Positive	14.046	100.082	no MS2: 2-Piperidone; CE0; XUWHAWMETYGRKB-UHFFFAOYSA-N	[M+H]+	C5H9NO	Piperidinones	XUWHAWMETYGRKB-UHFFFAOYSA-N	C1CCN=C(C1)O	28.763	0.00012075	19.719	0.013304	34.975	3e-06	1.74126	1.46146	1.62454	1	0.878472	1
196	Positive	11.971	523.295	low score: 5,15-Diacetyl-3-benzoyllathyrol	[M+H]+	C31H38O7	Diterpenoids	JPYYWXPAHJBKJX-PTKUAVCHSA-N	O=C(OC1C(C)CC2(OC(=O)C)C(=O)C(=CC3C(CCC(=C)C(OC(=O)C)C12)C3(C)C)C)C=4C=CC=CC4	0.15704	3.3e-05	0.3092	0.0034027	0.078128	3.33e-06	1.53726	1.46334	1.33096	0.94444	0.857639	1
197	Positive	13.386	100.084	no MS2: 2-Piperidone; CE0; XUWHAWMETYGRKB-UHFFFAOYSA-N	[M+H]+	C5H9NO	Piperidinones	XUWHAWMETYGRKB-UHFFFAOYSA-N	C1CCN=C(C1)O	28.414	0.00010726	19.078	0.012419	33.845	3.43e-06	1.74316	1.49224	1.63664	0.98611	0.902778	1
198	Positive	14.377	100.083	no MS2: 2-Piperidone; CE0; XUWHAWMETYGRKB-UHFFFAOYSA-N	[M+H]+	C5H9NO	Piperidinones	XUWHAWMETYGRKB-UHFFFAOYSA-N	C1CCN=C(C1)O	25.217	0.00015442	17.634	0.012613	30.523	3.48e-06	1.69997	1.47025	1.61264	0.96528	0.923611	1
199	Positive	10.574	360.213	low score: Unknown (carbon number 16); PlaSMA ID-2012	[M+NH4]+	C16H29N3O6	Unknown	null	null	0.21086	1.73e-05	0.48194	0.0092941	0.1643	3.84e-06	1.69308	1.34904	1.48213	1	0.833333	1
200	Positive	14.179	100.084	no MS2: 2-Piperidone; CE0; XUWHAWMETYGRKB-UHFFFAOYSA-N	[M+H]+	C5H9NO	Piperidinones	XUWHAWMETYGRKB-UHFFFAOYSA-N	C1CCN=C(C1)O	26.536	0.00014746	18.414	0.01365	31.655	4.34e-06	1.72844	1.46372	1.64254	0.97917	0.868056	1
201	Positive	7.988	225.212	low score: N~1~,N~4~-bis(3-aminopropyl)-1,4-butanediamine	[M+Na]+	C10H26N4	Dialkylamines	PFNFFQXMRSDOHW-UHFFFAOYSA-N	NCCCNCCCCNCCCN	28.67	0.00010114	31.019	0.0092205	33.113	4.94e-06	1.79357	1.54892	1.62693	1	0.930556	1
202	Positive	0.059	221.167	no MS2: Prilocaine	[M+H]+	C13H20N2O	Alpha amino acid amides	MVFGUOIZUNYYSO-UHFFFAOYSA-N	C1=CC=CC(=C1C)NC(C(NCCC)C)=O	6.6843	0.00019459	5.7943	0.015391	7.4672	5.72e-06	1.66751	1.33615	1.55186	0.95833	0.826389	1
203	Positive	11.656	372.338	low score: NCGC00380102-01!3-hexadecyl-4-methoxy-5-methyloxolan-2-one	[M+NH4]+	C22H42O3	Gamma butyrolactones	DJNFXUFERDZHCD-UHFFFAOYSA-N	CCCCCCCCCCCCCCCCC1C(OC)C(C)OC1=O	8.5151	0.0023733	14.405	0.0066296	13.871	6e-06	1.19769	1.38463	1.54278	0.83333	0.972222	1
204	Positive	8.49	502.314	no MS2: Serine conjugated chenodeoxycholic acid	[M+Na]+	C27H45NO6	Glycinated bile acids and derivatives	MIGXYHMLYVAUQT-DYUDRYMLSA-N	C[C@H](CCC(N[C@@H](CO)C(O)=O)=O)[C@H]1CC[C@@]2([H])[C@]3([H])[C@H](O)C[C@]4([H])C[C@H](O)CC[C@]4(C)[C@H]3CC[C@@]21C	22.578	1.22e-05	25.241	0.0031382	28.447	6.07e-06	1.82635	1.38292	1.56286	1	0.993056	1
205	Positive	11.207	478.368	low score: "((4R)-4-((3R,5S,7R,9S,10S,13R,14S,17R)-3,7-dihydroxy-10,13-dimethylhexadecahydro-1H-cyclopenta[a]phenanthren-17-yl)-2,2-dimethylpentanoyl)glycine"	[M+H]+	C28H47NO5	Glycinated bile acids and derivatives	HQPHGZUTNNVZLH-BOWXQMHNSA-N	[H][C@@]12[C@@H](O)C[C@@H]3C[C@H](O)CC[C@]3(C)[C@H]1CC[C@@]4(C)[C@H]2CC[C@@H]4[C@@H](CC(C)(C)C(NCC(O)=O)=O)C	0.19397	0.00015743	0.14969	0.00062191	0.075667	7.04e-06	1.38018	1.77086	1.41883	0.95139	0.972222	1
206	Positive	7.805	504.332	low score: glutamate conjugated chenodeoxycholic acid	[M-H2O+H]+	C29H47NO7	Glycinated bile acids and derivatives	MHOZNCAVRHAOKT-PYDJSGOHSA-N	O=C(O)CCC(N=C(O)CCC(C)C1CCC2C3C(O)CC4CC(O)CCC4(C)C3CCC12C)C(=O)O	20.366	9.06e-05	43.162	0.012436	29.8	8.39e-06	1.57658	1.40288	1.47709	0.89583	0.923611	1
207	Positive	11.069	114.1	low score: Unknown (carbon number 6); PlaSMA ID-45	[M+H]+	C6H11NO	Unknown	null	null	7.5476	0.00027648	6.6631	0.010592	9.2276	8.97e-06	1.699	1.71619	1.68332	0.93056	0.847222	1
208	Positive	8.898	504.343	low score: "((4R)-4-((3R,5S,7R,9S,10S,13R,14S,17R)-3,7-dihydroxy-10,13-dimethylhexadecahydro-1H-cyclopenta[a]phenanthren-17-yl)pentanoyl)-D-phenylalanine"	[M-2H2O+H]+	C33H49NO5	Glycinated bile acids and derivatives	CEMZGPKUKMFNNF-TUBYWNESSA-N	[H][C@@]12[C@H](O)C[C@@H]3C[C@H](O)CC[C@]3(C)[C@H]1CC[C@@]4(C)[C@H]2CC[C@@H]4[C@@H](CCC(N[C@H](CC5=CC=CC=C5)C(O)=O)=O)C	6.8159	0.00046352	6.7667	0.0092678	4.6848	1.06e-05	1.37527	1.23359	1.33882	0.96528	0.833333	1
209	Positive	0.661	100.084	no MS2: 2-Piperidone; CE0; XUWHAWMETYGRKB-UHFFFAOYSA-N	[M+H]+	C5H9NO	Piperidinones	XUWHAWMETYGRKB-UHFFFAOYSA-N	C1CCN=C(C1)O	8.6671	0.00017372	6.7851	0.012153	10.327	1.12e-05	1.66321	1.45929	1.55992	0.96528	0.833333	1
210	Positive	6.019	261.149	low score: Isoleucylglutamate	[M+H]+	C11H20N2O5	Dipeptides	KTGFOCFYOZQVRJ-UHFFFAOYSA-N	O=C(O)CCC(NC(=O)C(N)C(C)CC)C(=O)O	10.193	9.49e-05	16.154	0.009928	10.924	1.5e-05	1.62383	1.31583	1.5184	1	0.965278	1
211	Positive	6.408	377.241	low score: 5-[5-hydroxy-3-(hydroxymethyl)pentyl]-8a-(hydroxymethyl)-5,6-dimethyl-3,4,4a,6,7,8-hexahydronaphthalene-1-carboxylic acid	[M+Na]+	C20H34O5	Colensane and clerodane diterpenoids	VOCJFEUCJDTXSA-UHFFFAOYSA-N	O=C(O)C1=CCCC2C1(CO)CCC(C)C2(C)CCC(CO)CCO	11.894	0.00011667	18.589	0.0087906	13.715	1.5e-05	1.68448	1.38325	1.52207	0.97222	0.909722	1
212	Positive	6.489	203.133	low score: Alanylleucine (isomer of 674)	[M+H]+	C9H18N2O3	Peptides	RDIKFPRVLJLMER-UHFFFAOYSA-N	O=C(O)C(NC(=O)C(N)C)CC(C)C	10.072	0.00019435	16.755	0.0091113	10.515	1.75e-05	1.72878	1.45797	1.45504	0.93056	0.895833	1
213	Positive	9.351	616.295	low score: NCGC00381001-01_C32H41NO11_	[M+H]+	C32H41NO11	Glutamic acid and derivatives	AAIIJIOWYALNCC-PPNZYPONSA-N	C[C@@H]1CCC2C(C)(C)[C@H](OC(C)=O)[C@@H](C[C@]2(C)[C@@]13CC4=C(O3)C5=C(C=C4O)C(=O)N(C5)[C@@H](CCC(O)=O)C(O)=O)OC(C)=O	13.133	0.00010029	22.253	0.01005	8.1796	1.76e-05	1.59037	1.429	1.53604	0.94444	0.847222	1
214	Positive	10.354	504.342	low score: "((4R)-4-((3R,5S,7R,9S,10S,13R,14S,17R)-3,7-dihydroxy-10,13-dimethylhexadecahydro-1H-cyclopenta[a]phenanthren-17-yl)pentanoyl)-D-phenylalanine"	[M-2H2O+H]+	C33H49NO5	Glycinated bile acids and derivatives	CEMZGPKUKMFNNF-TUBYWNESSA-N	[H][C@@]12[C@H](O)C[C@@H]3C[C@H](O)CC[C@]3(C)[C@H]1CC[C@@]4(C)[C@H]2CC[C@@H]4[C@@H](CCC(N[C@H](CC5=CC=CC=C5)C(O)=O)=O)C	8.2302	7.39e-05	10.463	0.01055	8.8049	1.89e-05	1.45762	1.17958	1.19697	0.99306	0.875	1
215	Positive	8.9	476.308	low score: 4-((9S)-3,5,14-trihydroxy-10-((E)-((1-hydroxybutan-2-yl)imino)methyl)-13-methylhexadecahydro-1H-cyclopenta[a]phenanthren-17-yl)furan-2(5H)-one	[M+2Na-H]+	C27H41NO6	Cardenolides and derivatives	ASLHXRONSASUAK-FNNAZMBNSA-N	O=C1OCC(=C1)C2CCC3(O)C4CCC5(O)CC(O)CCC5(C=NC(CO)CC)C4CCC23C	7.1664	0.00016117	8.2223	0.014553	6.9244	2.12e-05	1.58334	1.34181	1.33223	0.91667	0.840278	1
216	Positive	7.806	432.269	low score: NCGC00381130-01!methyl (2E,8E)-9-[3a-hydroxy-6,7-dimethyl-1-(2-methylpropyl)-3-oxo-2,4,7,7a-tetrahydro-1H-isoindol-4-yl]-4,5-dihydroxy-8-methylnona-2,8-dienoate [IIN-based on: CCMSLIB00000846918]	[M-H2O+H]+	C25H39NO6	Bicyclic monoterpenoids	YUXUTEAAGHFKKH-MKQCFFQWSA-N	COC(=O)\\C=C\\C(O)C(O)CC\\C(C)=C\\C1C=C(C)C(C)C2C(CC(C)C)NC(=O)C12O	31.199	0.00030184	61.276	0.011934	62.319	2.16e-05	1.49155	1.41246	1.45682	0.94444	0.8125	1
217	Positive	18.456	373.125	no MS2: NCGC00381050-01!7-(5,7-dimethoxy-4-oxochromen-2-yl)-6-hydroxyheptanoic acid [IIN-based on: CCMSLIB00000845870]	[M+Na]+	C18H22O7	Chromones	CRHUZHVITSVUHQ-UHFFFAOYSA-N	COC1=CC(OC)=C2C(=O)C=C(CC(O)CCCCC(O)=O)OC2=C1	55.653	0.00055135	92.548	0.013097	58.099	3.63e-05	1.03216	1.01235	1.06113	0.9375	0.819444	1
218	Positive	7.805	415.242	low score: Tentoxin	[M+H]+	C22H30N4O4	Oligopeptides	SIIRBDOFKDACOK-LFXZBHHUSA-N	C[C@H]1C(=O)N[C@H](C(=O)N(/C(=C\C2=CC=CC=C2)/C(=O)NCC(=O)N1C)C)CC(C)C	153.18	0.00047846	245.93	0.02043	308.75	3.87e-05	1.42739	1.28347	1.3979	0.90972	0.819444	1
219	Positive	1.299	249.043	low score: 4-methoxy-9H-xanthen-9-one	[M+Na]+	C14H10O3	Xanthones	SYEHHMRXODULBY-UHFFFAOYSA-N	O=C1C=2C=CC=CC2OC=3C(OC)=CC=CC13	29.486	0.0028773	40.759	0.012893	61.264	4.08e-05	1.05852	1.39168	1.14099	0.81944	0.8125	1
220	Positive	7.328	353.172	low score: meso-dihydroguaiaretic acid	[M+Na]+	C20H26O4	Dibenzylbutane lignans	ADFOLUXMYYCTRR-ZIAGYGMSSA-N	OC1=CC=C(C=C1OC)CC(C)C(C)CC2=CC=C(O)C(OC)=C2	6.0445	0.00024816	11.532	0.0070862	4.5151	4.11e-05	1.15571	1.19623	1.01765	0.93056	0.854167	1
221	Positive	8.457	525.315	no MS2: NCGC00180395-03!(2E,6E,12E)-18-(2,6-dioxopiperidin-4-yl)-9,11-dihydroxy-8-methoxy-10,12,14-trimethyl-15-oxooctadeca-2,6,12-trienoic acid	[M+NH4]+	C27H41NO8	Lineolic acids and derivatives	YQDJUXPUIRGKNV-MNOLRWOYSA-N	COC(\C=C\CC\C=C\C(O)=O)C(O)C(C)C(O)C(\C)=C\C(C)C(=O)CCCC1CC(=O)NC(=O)C1	4.6189	9.05e-06	7.607	0.004515	3.9067	7.15e-05	1.39263	1.28596	1.02057	0.97222	0.916667	1
222	Positive	0.207	122.096	no MS2: 2,6-Xylidine	[M+H]+	C8H11N	m-Xylenes	UFFBMTHBGFGIHF-UHFFFAOYSA-N	CC1=CC=CC(C)=C1N	11.604	4.47e-05	11.158	0.0097473	21.891	0.00011933	1.09126	1.25729	1.00815	1	0.826389	1
223	Positive	13.505	354.218	no MS2: Methysergide	[M+H]+	C21H27N3O2	Lysergamides	KPJZHOPZRAFDTN-ZRGWGRIASA-N	CCC(CO)NC(=O)C(C4)C=C(C(N(C)4)1)c(c3)c(c(cc3)2)c(cn(C)2)C1	7.336	0.00071643	10.858	0.0090956	4.2369	0.00013153	1.20101	1.04045	1.0402	0.88889	0.868056	1
224	Positive	9.037	571.302	no MS2: NCGC00386085-01_C32H44O10_	[M-H2O+H]+	C32H44O10	Oxepanes	MPCIDUFOTGXABA-UHFFFAOYSA-N	CC1OC\23C/4=C(/C(O)C5C(C)(CCC6OC(CC(OC(C)=O)C56C)C(C)(C)O)O4)C(=O)\C=C2C(C)C(OC(C)=O)C13C	7.6843	0.0010086	12.355	0.0025057	7.1155	0.00017564	1.10632	1.37387	1.0005	0.90625	0.920139	1
225	Positive	13.544	589.38	low score: "(3R,6R)-6-((3R,5R,7R,8R,9S,10S,12S,13R,14S,17R)-3,7-diacetoxy-12-hydroxy-10,13-dimethylhexadecahydro-1H-cyclopenta[a]phenanthren-17-yl)heptane-1,3-diyl diacetate"	[M-H2O+H]+	C34H54O9	Monohydroxy bile acids, alcohols and derivatives	MRBBYYYXCVLILT-VUXPKORVSA-N	C[C@@H]([C@H]1CC[C@]2([H])[C@]1(C)[C@@H](O)C[C@@]3([H])[C@@]2([H])[C@H](OC(C)=O)C[C@]4([H])[C@]3(C)CC[C@@H](OC(C)=O)C4)CC[C@@H](OC(C)=O)CCOC(C)=O	0.18208	3.85e-05	0.42778	0.0082267	0.085422	2.78e-07	1.57122	1.43483	1.61364	0.98611	0.8125	0.989583
226	Positive	0.376	313.218	low score: Guggulsterone E&Z	[M+H]+	C21H28O2	Androgens and derivatives	WDXRGPWQVHZTQJ-AYSLTRBKSA-N	O=C1C=C2CCC3C4CC(=O)C(=CC)C4(C)CCC3C2(C)CC1	9.7049	4.69e-05	17.279	0.0087276	9.1114	4.64e-06	1.62904	1.48309	1.44067	0.97222	0.895833	0.989583
227	Positive	8.553	602.315	no MS2: NCGC00384679-01_C33H44O9_(1S,2S,3aR,4S,5S,6E,9R,11R,12E,13aS)-4,9,11-Triacetoxy-3a-hydroxy-2,5,8,8,12-pentamethyl-2,3,3a,4,5,8,9,10,11,13a-decahydro-1H-cyclopenta[12]annulen-1-yl benzoate	[M+NH4]+	C33H44O9	Jatrophane and cyclojatrophane diterpenoids	BRVXVMOWTHQKHC-LKCWGRRXSA-N	C[C@H]1C[C@]2(O)[C@@H](OC(C)=O)[C@@H](C)/C=C/C(C)(C)[C@@H](C[C@@H](OC(C)=O)\C(=C\[C@H]2[C@H]1OC(=O)C3=CC=CC=C3)C)OC(C)=O	9.6151	0.00034122	20.571	0.0017895	8.5911	6.08e-06	1.34407	1.28172	1.21096	0.89583	0.951389	0.989583
228	Positive	9.583	603.331	low score: (1S,2S,5R,7R,10S,11S,14R,16R,19S,20S,23R,25R)-5,14-diethyl-2,11,20,23-tetramethyl-4,13,22,28,29,30-hexaoxatetracyclo[23.2.1.1?,??.1??,??]triacontane-3,12,21-trione	[M+H-2H2O]+	C32H52O9	Macrolides and analogues	MXZXIBZNZUOHER-VHWZNAHMSA-N	O=C1OC(C)CC2OC(CC2)C(C(=O)OC(CC)CC3OC(CC3)C(C(=O)OC(CC)CC4OC(CC4)C1C)C)C	10.309	2.66e-05	22.317	0.0018927	10.482	1.47e-05	1.61244	1.29671	1.40217	1	0.944444	0.989583
229	Positive	6.419	405.201	low score: 7-[(6-hydroxy-5,5,8a-trimethyl-2-methylidene-3,4,4a,6,7,8-hexahydro-1H-naphthalen-1-yl)methoxy]chromen-2-one	[M+Na]+	C24H30O4	Coumarins and derivatives	FCWYNTDTQPCVPG-UHFFFAOYSA-N	O=C1OC=2C=C(OCC3C(=C)CCC4C(C)(C)C(O)CCC34C)C=CC2C=C1	2.8488	0.0014826	8.6691	0.0022223	3.0382	1.66e-05	1.05389	1.3219	1.20327	0.84028	0.979167	0.989583
230	Positive	14.356	397.302	low score: Unknown (carbon number 27); PlaSMA ID-2179	[M+H]+	C27H40O2	Unknown	null	null	55.126	0.0001505	179.86	0.013304	38.901	2.1e-05	1.30955	1.17621	1.26208	0.94444	0.888889	0.989583
231	Positive	7.706	187.127	low score: bis-(acetyl)diaminopentane	[M+H]+	C9H18N2O2	Acetamides	FQKKPLXFGDCBJT-UHFFFAOYSA-N	OC(=NCCCCCN=C(O)C)C	21.934	0.00018251	13.247	0.015538	18.218	3.86e-05	1.15698	1.08491	1.1801	0.97917	0.847222	0.989583
232	Positive	9.121	702.293	no MS2: NCGC00380355-01!(7E,13E)-9,15-dihydroxy-4,10,16-trimethyl-1,5,11-trioxacyclohexadeca-7,13-diene-2,6,12-trione [IIN-based on: CCMSLIB00000848983]	[2M+NH4]+	C16H22O8	Macrolides and analogues	MJMMUATWVTYSFD-YDFGWWAZSA-N	CC1CC(=O)OC(C)C(O)\\C=C\\C(=O)OC(C)C(O)\\C=C\\C(=O)O1	10.32	0.0011302	21.334	0.013457	13.359	5e-05	1.29557	1.11867	1.21973	0.89583	0.840278	0.989583
233	Positive	16.069	755.623	low score: (2E,6E)-3,7,11,15,19,23,27,31,35-nonamethylhexatriaconta-2,6,34-triene-1,10,11,15,19,23,27,31-octol	[M+H]+	C45H86O8	Polyprenols	MFQDKOXWQXOOAO-YAHSWYSTSA-N	OCC=C(C)CCC=C(C)CCC(O)C(O)(C)CCCC(O)(C)CCCC(O)(C)CCCC(O)(C)CCCC(O)(C)CCCC(O)(C)CCC=C(C)C	0.11979	4.05e-05	0.19631	0.0018405	0.045263	3.06e-06	1.44125	1.49796	1.42328	0.9375	0.916667	0.979167
234	Positive	14.38	451.243	no MS2: Ingenol-3,4-5,20-diacetonide	[M+Na]+	C26H36O5	Ketals	JOKBBQPBIIZMJV-JQFFUGKZSA-N	O=C1C2C=C3COC(OC3C45OC(OC5C(=CC14C(C)CC6C2C6(C)C)C)(C)C)(C)C	34.337	1.94e-05	76.786	0.00929	24.546	8.6e-06	1.55697	1.17046	1.3889	0.94444	0.940972	0.979167
235	Positive	1.146	166.086	Phenylalanine	[M+H]+	C9H11NO2	Phenylalanine and derivatives	COLNVLDHVKWLRT-UHFFFAOYSA-N	O=C(O)C(N)CC=1C=CC=CC1	7.1505	3.7e-05	4.7779	0.0052175	4.1885	8.91e-06	1.41487	1.53392	1.24331	0.97222	0.805556	0.979167
236	Positive	15.27	633.192	low score: (S)-7-(((2S,3R,4S,5S,6R)-4,5-dihydroxy-6-(hydroxymethyl)-3-(((2S,3R,4R,5R,6S)-3,4,5-trihydroxy-6-methyltetrahydro-2H-pyran-2-yl)oxy)tetrahydro-2H-pyran-2-yl)oxy)-5-hydroxy-2-(3-hydroxy-5-methoxyphenyl)chroman-4-one	[M+Na]+	C28H34O15	Flavonoid-7-O-glycosides	TWAZWVPPDIUVOD-UZRWAPQLSA-N	O=C1C2=C(O)C=C(OC3OC(CO)C(O)C(O)C3OC4OC(C)C(O)C(O)C4O)C=C2OC(C=5C=C(O)C=C(OC)C5)C1	44.893	1.1e-06	126.62	0.010618	37.084	1.21e-05	1.9845	1.1246	1.38388	0.98611	0.909722	0.979167
237	Positive	5.962	353.246	low score: "(R)-4-((3R,5S,8R,9S,10S,13R,14S,17R)-3-hydroxy-10,13-dimethyl-7-oxohexadecahydro-1H-cyclopenta[a]phenanthren-17-yl)pent-2-enoic acid"	[M-2H2O+H]+	C24H36O4	Oxosteroids	MEFHLJCGADQRRZ-NLMWUSBQSA-N	C[C@@H]([C@H]1CC[C@]2([H])[C@]1(C)CC[C@@]3([H])[C@@]2([H])C(C[C@@]4([H])[C@]3(C)CC[C@@H](O)C4)=O)/C=C/C(O)=O	24.61	9.78e-05	40.369	0.0096026	23.444	1.26e-05	1.62868	1.45759	1.36737	0.90972	0.833333	0.979167
238	Positive	0.697	307.099	low score: NCGC00142553-05!5,7-dimethoxy-2-phenyl-2,3-dihydrochromen-4-one [IIN-based on: CCMSLIB00000848562]	[M+Na]+	C17H16O4	7-O-methylated flavonoids	IAFBOKYTDSDNHV-UHFFFAOYSA-N	COC1=CC2=C(C(=O)CC(O2)C3=CC=CC=C3)C(OC)=C1	19.807	0.0002467	35.657	0.0072838	16.866	1.28e-05	1.4586	1.34813	1.32697	0.875	0.9375	0.979167
239	Positive	8.446	484.314	low score: Taurolithocholate	[M+H]+	C26H45NO5S	Taurinated bile acids and derivatives	QBYUNVOYXHFVKC-GBURMNQMSA-N	C[C@H](CC/C(=N/CCS(=O)(=O)O)/O)[C@H]1CC[C@@H]2[C@@]1(CC[C@H]3[C@H]2CC[C@H]4[C@@]3(CC[C@H](C4)O)C)C	7.8413	0.00055162	10.821	0.007408	5.9438	1.47e-05	1.08786	1.45248	1.07966	0.91667	0.840278	0.979167
240	Positive	6.394	212.134	low score: Mescaline	[M+H]+	C11H17NO3	Phenethylamines	RHCSKNNOAZULRK-UHFFFAOYSA-N	COC1=CC(=CC(=C1OC)OC)CCN	9.3713	2.75e-05	20.147	0.0093896	9.8537	1.78e-05	1.61536	1.43352	1.38284	0.96528	0.805556	0.979167
241	Positive	6.514	405.239	low score: Hydrocortisonacetate	[M+H]+	C23H32O6	Gluco/mineralocorticoids, progestogins and derivatives	ALEXXDVDDISNDU-JZYPGELDSA-N	CC(=O)OCC(=O)[C@@]1(O)CC[C@H]2[C@@H]3CCC4=CC(=O)CC[C@]4(C)[C@H]3[C@@H](O)C[C@]12C	2.971	0.00014372	7.2193	0.012055	2.4027	2.84e-05	1.28107	1.0898	1.09226	0.91667	0.868056	0.979167
242	Positive	14.302	285.301	low score: N-[3-(Dimethylamino)propyl]dodecanamide	[M+H]+	C17H36N2O	N-acyl amines	TWMFGCHRALXDAR-UHFFFAOYSA-N	CCCCCCCCCCCC(=O)NCCCN(C)C	19.816	0.00026688	29.784	0.011748	14.934	4.41e-05	1.37989	1.29445	1.41402	0.92361	0.902778	0.979167
243	Positive	17.31	367.35	low score: Nervonic Acid	[M+H]+	C24H46O2	Very long-chain fatty acids	GWHCXVQVJPWHRF-KTKRTIGZSA-N	O=C(O)CCCCCCCCCCCCCC=CCCCCCCCC	0.25771	0.00015442	0.1837	3.56e-05	0.13806	3.9e-06	1.53994	1.9693	1.42545	0.93056	0.958333	0.96875
244	Positive	6.515	375.224	low score: 6a_Methylprednisolone	[M+H]+	C22H30O5	21-hydroxysteroids	VHRSUDSXCMQTMA-UHFFFAOYSA-N	[H]OC([H])([H])C(=O)C(O[H])(C([H])([H])4)C(C([H])([H])[H])(C([H])([H])3)C([H])(C([H])([H])4)C([H])(C([H])([H])1)C([H])(C([H])(O[H])3)C(C([H])=2)(C([H])([H])[H])C(=C([H])C(=O)C([H])2)C([H])(C([H])([H])[H])1	8.2464	1.72e-05	23.5	0.0066296	7.4164	6.55e-06	1.37369	1.25837	1.24768	0.98611	0.902778	0.96875
245	Positive	13.475	393.237	low score: monolinolein	[M+K]+	C21H38O4	Lineolic acids and derivatives	WECGLUPZRHILCT-HZJYTTRNSA-N	O=C(OCC(O)CO)CCCCCCCC=CCC=CCCCCC	0.39036	0.0006621	0.30717	0.00014275	0.21715	6.88e-06	1.45906	1.64697	1.36291	0.86806	0.951389	0.96875
246	Positive	0.427	141.01	low score: CYCLOSERINE	[M+K]+	C3H6N2O2	Alpha amino acids and derivatives	DYDCUQKUCUHJBH-UWTATZPHSA-N	OC1=NOCC1N	10.164	0.00015162	17.342	0.011411	8.7876	1.7e-05	1.28911	1.39129	1.40777	0.97917	0.840278	0.96875
247	Positive	0.22	593.196	no MS2: Pantethine	[M+K]+	C22H42N4O8S2	Beta amino acids and derivatives	DJWYOLJPSHDSAL-UHFFFAOYSA-N	OC(=NCCSSCCN=C(O)CCN=C(O)C(O)C(C)(C)CO)CCN=C(O)C(O)C(C)(C)CO	49.902	8.62e-05	65.825	0.010585	71.109	7.21e-05	1.47658	1.54548	1.11055	0.96181	0.822917	0.96875
248	Positive	13.884	380.235	no MS2: CP-401387	[M+H]+	C23H29N3O2	Indazoles	PRUGWHGQBHEDAX-QXONSOMPSA-N	CCC1=NN(C2CCCCC2)C2=C1C=CC(=C2)[C@]1(CC[C@@H](CC1)C(O)=O)C#N	15.035	0.00091998	13.518	0.012989	10.731	0.00013284	1.15831	1.05948	1.06213	0.89583	0.840278	0.96875
249	Positive	15.223	285.3	low score: N-[3-(Dimethylamino)propyl]dodecanamide	[M+H]+	C17H36N2O	N-acyl amines	TWMFGCHRALXDAR-UHFFFAOYSA-N	CCCCCCCCCCCC(=O)NCCCN(C)C	4.2685	0.00074869	5.2479	0.009003	4.4247	0.00014108	1.31749	1.35506	1.2843	0.86806	0.854167	0.96875
250	Positive	13.349	420.25	low score: Phytosphingosine-1-P	[M+Na]+	C18H40NO6P	Phosphosphingolipids	AYGOSKULTISFCW-KZNAEPCWSA-N	CCCCCCCCCCCCCC[C@H]([C@@H]([C@@H](COP(=O)(O)O)N)O)O	0.27159	0.00019069	0.38882	0.0051498	0.11796	7.31e-07	1.57038	1.47596	1.60582	0.91667	0.892361	0.958333
251	Positive	14.303	397.297	low score: Unknown (carbon number 27); PlaSMA ID-2179	[M+H]+	C27H40O2	Unknown	null	null	48.449	0.00036188	139.73	0.013012	34.28	1.64e-05	1.32613	1.2213	1.34215	0.89583	0.840278	0.958333
252	Positive	6.352	333.212	low score: 14-deoxy-11,12-dihydroandrographolide	[M+H]+	C20H28O4	Diterpene lactones	GQPOXOPEDHRPQT-CRBRZBHVSA-N	O=C1OCC(C=CC2C(=C)CCC3C(C)(CO)C(O)CCC23C)=C1	6.3972	9.67e-05	8.5606	0.011433	6.9601	6.31e-05	1.66053	1.25727	1.51752	0.97222	0.847222	0.958333
253	Positive	8.761	496.377	1-O-hexadecyl-2-C-methyl-3-phosphatidylcholine	[M+H]+	C25H54NO6P	Glycerophosphocholines	BZLKOORCGCYQJZ-UHFFFAOYSA-N	CCCCCCCCCCCCCCCCOCC(C)(COP(=O)([O-])OCC[N+](C)(C)C)O	573.75	0.00036559	448.38	0.016606	508.32	7.16e-05	1.68516	1.49348	1.52548	0.90278	0.902778	0.958333
254	Positive	14.091	157.093	no MS2: SUBERATE	[M-H2O+H]+	C8H14O4	Medium-chain fatty acids	TYFQFVWCELRYAO-UHFFFAOYSA-N	OC(=O)CCCCCCC(O)=O	6.2017	2.52e-05	6.4142	0.0092554	8.3884	7.11e-06	1.73669	1.47051	1.29497	0.97917	0.868056	0.947917
255	Positive	9.006	497.192	no MS2: 2,7,7,11,15,17-hexamethyl-18-methylidene-5,13,16-trioxo-6,14-dioxatetracyclo[9.8.0.0?,?.0??,??]nonadec-3-en-10-yl acetate	[M+K]+	C26H34O7	Naphthopyrans	JFYYCQXZVIOBKU-UHFFFAOYSA-N	O=C1OC(C)(C)C2CC(OC(=O)C)C3(C)C4C(=O)OC(C(=O)C4(C(=C)CC3C2(C=C1)C)C)C	8.6791	0.00012158	13.052	0.016802	5.869	0.00019476	1.59377	1.32643	1.30646	0.9375	0.815972	0.947917
256	Positive	10.519	734.238	low score: Schizopeltic acid	[2M+NH4]+	C19H18O7	Dibenzofurans	WBIQYHZEYQDKCL-UHFFFAOYSA-N	Cc1c(C(=O)OC)c(OC)cc2c1c1c(cc(c(C(=O)O)c1o2)C)OC	33.359	0.0013398	57.126	0.015654	28.966	0.00028516	1.29152	1.30962	1.30241	0.91319	0.822917	0.942708
257	Positive	13.601	215.139	no MS2: DETHIOBIOTIN	[M+H]+	C10H18N2O3	Medium-chain fatty acids	AUTOLBMXDDTRRT-JGVFFNPUSA-N	C[C@H]1[C@H](NC(=O)N1)CCCCCC(=O)O	4.0427	0.00011667	4.3618	0.011776	4.4455	3.55e-05	1.77571	1.27559	1.50753	0.90972	0.8125	0.9375
258	Negative	0.911	307.136	low score: Caffeoyl lysine	[M-H]-	C15H20N2O5	Hydroxycinnamic acids and derivatives	WVFMZTORJFNZPK-UHFFFAOYSA-N	NC(CCCCNC(=O)C=CC1=CC(O)=C(O)C=C1)C(O)=O	0.30504	0.00054924	0.21954	0.00019962	0.2193	4.45e-05	1.26067	1.44229	1.13659	0.85417	0.958333	0.9375
259	Positive	10.516	707.251	low score: (2R,3S,4S,5R,6S)-2-(hydroxymethyl)-6-[4-[[(3S,4S)-4-(hydroxymethyl)-5-[3-methoxy-4-[(2S,3R,4S,5S,6R)-3,4,5-trihydroxy-6-(hydroxymethyl)oxan-2-yl]oxyphenyl]oxolan-3-yl]methyl]-2-methoxyphenoxy]oxane-3,4,5-triol	[M+Na]+	C32H44O16	Lignan glycosides	PBLWZMSRSJTRHJ-HVZZXTKSSA-N	OCC1OC(OC2=CC=C(C=C2OC)CC3COC(C4=CC=C(OC5OC(CO)C(O)C(O)C5O)C(OC)=C4)C3CO)C(O)C(O)C1O	35.105	0.00038277	60.125	0.0086437	27.006	1.75e-05	1.337	1.52834	1.4916	0.9375	0.861111	0.932292
260	Positive	12.402	221.168	low score: Prilocaine	[M+H]+	C13H20N2O	Alpha amino acid amides	MVFGUOIZUNYYSO-UHFFFAOYSA-N	C1=CC=CC(=C1C)NC(C(NCCC)C)=O	3.2662	0.00030261	2.7062	0.0068483	2.6296	9.89e-06	1.19666	1.52429	1.42924	0.94444	0.868056	0.927083
261	Positive	6.478	413.268	low score: 2-acetoxy-4-pentadecylbenzoic acid	[M+Na]+	C24H38O4	Acylsalicylic acids	FMPIFABORGZGFA-UHFFFAOYSA-N	OC(C1=CC=C(CCCCCCCCCCCCCCC)C=C1OC(C)=O)=O	3.7901	9.25e-05	3.5591	0.0090051	4.1568	5.93e-05	1.60491	1.47915	1.46483	0.97222	0.875	0.927083
262	Positive	11.339	429.349	low score: (1S,2R,5R,6R,10R,13S,15S)-5-[(2R,3E,5R)-5,6-dimethylhept-3-en-2-yl]-6,10-dimethyl-16,17-dioxapentacyclo[13.2.2.0?,?.0?,?.0??,??]nonadec-18-en-13-ol	[M+H]+	C28H44O3	Ergostane steroids	VXOZCESVZIRHCJ-LNSUSAKYSA-N	OC1CCC2(C)C3CCC4(C)C(CCC4C53OOC2(C=C5)C1)C(C=CC(C)C(C)C)C	4.9213	0.00031648	10.23	0.0029763	5.1306	6.32e-05	1.22738	1.48649	1.03089	0.85417	0.895833	0.927083
263	Positive	9.103	522.378	low score: (1S,4aR,6aS,6bR,9R,10R,11R,12aR,14bS)-1,10,11-trihydroxy-9-(hydroxymethyl)-2,2,6a,6b,9,12a-hexamethyl-1,3,4,5,6,6a,7,8,8a,10,11,12,13,14b-tetradecahydropicene-4a-carboxylic acid_major	[M+NH4]+	C30H48O6	Triterpenoids	IFIQVSCCFRXSJV-ZIZFEDMCSA-N	CC1(C)CCC2(C(=O)O)CCC3(C)C(=CCC4C5(C)CC(O)C(O)C(C)(CO)C5CCC43C)C2C1O	31.751	2.97e-05	39.628	0.0040916	22.509	8.05e-05	1.84233	1.53536	1.40526	1	0.833333	0.927083
264	Positive	9.236	425.338	low score: delta-tocopherol	[M+Na]+	C27H46O2	Tocopherols	GZIFEOYASATJEH-BCQCSXDESA-N	OC=1C=C(C=2OC(C)(CCC2C1)CCCC(C)CCCC(C)CCCC(C)C)C	25.185	0.0023481	21.643	0.0078506	6.3667	0.00013717	1.01701	1.37001	1.16801	0.93056	0.822917	0.927083
265	Positive	6.225	437.267	low score: tBuO-Glu(Ome)-Val-hexanoate	[M+2Na-H]+	C21H38N2O6	Peptides	KMRMSYHYOVGWCM-UHFFFAOYSA-N	CCCCCC(NC(C(C)C)C(NC(CCC(OC)=O)C(OC(C)(C)C)=O)=O)=O	16.762	9.55e-05	47.217	0.0096684	15.52	6.47e-05	1.62161	1.25736	1.27991	0.89583	0.875	0.916667
266	Positive	14.907	395.25	low score: "(R)-4-((8S,9S,10R,13R,14S,17R)-10,13-dimethyl-3-oxo-2,3,6,7,8,9,10,11,12,13,14,15,16,17-tetradecahydro-1H-cyclopenta[a]phenanthren-17-yl)pentanoic acid"	[M+Na]+	C24H36O3	Bile acids, alcohols and derivatives	WCFIGQHNBJXROP-IHMUCKAYSA-N	C[C@@H]([C@H]1CC[C@]2([H])[C@]1(C)CC[C@@]3([H])[C@@]2([H])CCC([C@]3(C)CC4)=CC4=O)CCC(O)=O	0.32591	0.00084082	0.47775	0.017803	0.17144	1.48e-05	1.40183	1.2958	1.47256	0.875	0.854167	0.90625
267	Positive	13.34	367.279	no MS2: Kalkitoxin	[M+H]+	C21H38N2OS	N-acyl amines	PHYRFZDJEDWWKT-UJWQCDCRSA-N	CC[C@@H](C)C(=O)N(C)CC[C@@H](C)C[C@H](C)[C@H](C)CC1=N[C@@H](CS1)C=C	0.33176	0.00045004	0.3907	0.0027592	0.20232	1.5e-05	1.29508	1.40651	1.26297	0.85417	0.881944	0.90625
268	Positive	16.479	355.093	low score: Scopolin	[M+H]+	C16H18O9	Coumarin glycosides	SGTCGCCQZOUMJJ-YMILTQATSA-N	O=C1OC=2C=C(OC3OC(CO)C(O)C(O)C3O)C(OC)=CC2C=C1	47.909	0.00098987	53.835	0.0077527	36.074	1.89e-05	1.01283	1.42857	1.35464	0.94444	0.888889	0.90625
269	Positive	16.282	355.095	no MS2: [1-hydroxy-1-(4-methoxyphenyl)propan-2-yl] 4-methoxybenzoate	[M+K]+	C18H20O5	P-methoxybenzoic acids and derivatives	MHJLKHNHGMUAPQ-UHFFFAOYSA-N	O=C(OC(C)C(O)C1=CC=C(OC)C=C1)C2=CC=C(OC)C=C2	32.054	0.0013559	32.022	0.0087276	26.441	3.11e-05	1.04293	1.48851	1.36364	0.875	0.875	0.90625
270	Positive	0.365	273.187	low score: Galaxolidone	[M+H]+	C18H24O2	2-benzopyrans	PGMHPYRIXBRRQD-UHFFFAOYSA-N	CC2(C)c1cc3C(=O)OCC(C)c3cc1C(C)(C)C2C	5.4476	0.00017691	4.4763	0.014138	5.6488	3.41e-05	1.40618	1.2633	1.46984	0.96528	0.833333	0.90625
271	Positive	6.521	479.277	low score: Schweinfurthin F	[M+Na]+	C30H38O5	Xanthenes	BUFNPAYKUGAAAO-CMDGGOBGSA-N	COC1=CC(/C=C/C2=CC(O)=C(C(O)=C2)C/C=C(C)\C)=CC3=C1OC4(CCC(C(C)(C4C3)C)O)C	9.8901	0.00017832	22.141	0.0061122	11.023	6.74e-05	1.53948	1.46717	1.37569	0.94444	0.923611	0.90625
272	Positive	0.08	207.045	low score: 5-(1,2-dithiolan-3-yl)pentanoic acid	[M+H]+	C8H14O2S2	Lipoic acids and derivatives	AGBQKNBQESQNJD-UHFFFAOYSA-N	O=C(O)CCCCC1SSCC1	4.0268	0.00010291	3.2786	0.014338	4.1616	8.54e-05	1.54877	1.39063	1.30071	0.95833	0.815972	0.90625
273	Positive	0.11	372.127	no MS2: NCGC00380360-01!7-methoxy-6-[(2S,3R,4S,5S,6R)-3,4,5-trihydroxy-6-(hydroxymethyl)oxan-2-yl]oxychromen-2-one	[M+NH4]+	C16H18O9	Coumarin glycosides	WBAVLTNIRYDCPM-YMILTQATSA-N	COC1=CC2=C(C=CC(=O)O2)C=C1O[C@@H]3O[C@H](CO)[C@@H](O)[C@H](O)[C@H]3O	28.131	0.00021032	36.791	0.0087175	30.13	0.00011016	1.45274	1.4594	1.14963	0.94444	0.930556	0.90625
274	Positive	15.356	557.46	low score: (4R)-5',6a,8a,9-tetramethyldocosahydrospiro[naphtho[2',1':4,5]indeno[2,1-b]furan-10,2'-pyran]-4-yl nonanoate	[M+H]+	C36H60O4	Triterpenoids	BVMVRPVYRJQROP-XYUNULTHSA-N	O=C(OC1CCC2(C)C(CCC3C2CCC4(C)C3CC5OC6(OCC(C)CC6)C(C)C54)C1)CCCCCCCC	0.24113	0.00014216	0.34928	0.0030194	0.16633	7.77e-06	1.44427	1.55972	1.56689	0.94444	0.888889	0.895833
275	Positive	14.302	358.233	low score: Bullatine G	[M+H]+	C22H31NO3	Napelline-type diterpenoid alkaloids	CBOSLVQFGANWTL-JAQKJRLSSA-N	O=C1CC2C3(CC1C(=C)C3O)C4CC5C6(C)CN(CC)C4C25C(O)CC6	10.045	6.49e-05	20.918	0.0077391	6.5425	6.93e-05	1.2696	1.25874	1.12213	0.95833	0.930556	0.895833
276	Positive	14.301	387.307	low score: Bourgeanic acid	[M+H]+	C22H42O5	3-(3-hydroxyalkanoyloxy)alkanoic acids	ZQEUMOKDJCSNHB-IHRHECOVSA-N	CC[C@@H](C)C[C@@H](C)[C@@H]([C@H](C)C(=O)O[C@@H]([C@H](C)C[C@H](C)CC)[C@H](C)C(=O)O)O	26.029	0.0001424	62.71	0.0094993	18.678	0.00018554	1.31725	1.34291	1.12617	0.9375	0.868056	0.895833
277	Positive	0.291	519.175	no MS2: [(2S,3S,4R,5R)-4-hydroxy-2,5-bis(hydroxymethyl)-2-[(2R,3R,4S,5S,6R)-3,4,5-trihydroxy-6-(hydroxymethyl)oxan-2-yl]oxyoxolan-3-yl] (E)-3-(4-hydroxy-3-methoxyphenyl)prop-2-enoate	[M+H]+	C22H30O14	Coumaric acids and derivatives	ZPEADZHVGOCGKH-YQTDNFGYSA-N	O=C(OC1C(O)C(OC1(OC2OC(CO)C(O)C(O)C2O)CO)CO)C=CC3=CC=C(O)C(OC)=C3	48.92	0.00063567	61.995	0.0060437	49.25	0.00030945	1.3451	1.47263	1.07105	0.88194	0.9375	0.895833
278	Positive	14.302	439.287	low score: (2E,4E,6E,8E,10E,12E,14E,16E)-2,6,11,15-tetramethyl-17-(2,6,6-trimethyl-1-cyclohexen-1-yl)-2,4,6,8,10,12,14,16-heptadecaoctaenal	[M+Na]+	C30H40O	Triterpenoids	DFMMVLFMMAQXHZ-DOKBYWHISA-N	O=CC(=CC=CC(=CC=CC=C(C=CC=C(C=CC1=C(C)CCCC1(C)C)C)C)C)C	24.155	2.11e-05	47.447	0.010436	20.374	2.94e-05	1.62451	1.48628	1.40095	0.88889	0.809028	0.885417
279	Positive	12.511	331.308	low score: MMV687273	[M+H]+	C22H38N2	Monoterpenoids	JFIBVDBTCDTBRH-IDUWFGFVSA-N	C(=C(C)C)CCC(=CCNCCNC1C2CC3CC(C2)CC1C3)C	938.17	0.00020641	1195.5	0.022921	660.34	3.45e-05	1.58954	1.33387	1.56349	1	0.840278	0.885417
280	Positive	15.276	371.126	no MS2: 1-[2-hydroxy-4-(3-hydroxy-5-methylphenoxy)-6-methylphenyl]-3-methylbutane-2,3-diol	[M+K]+	C19H24O5	Diphenylethers	FLLRZSQAKUHACV-UHFFFAOYSA-N	OC=1C=C(OC2=CC(O)=C(C(=C2)C)CC(O)C(O)(C)C)C=C(C1)C	54.473	0.001019	51.261	0.0096029	57.193	3.6e-05	1.32688	1.4568	1.26777	0.89583	0.909722	0.885417
281	Positive	18.411	355.095	no MS2: [1-hydroxy-1-(4-methoxyphenyl)propan-2-yl] 4-methoxybenzoate	[M+K]+	C18H20O5	P-methoxybenzoic acids and derivatives	MHJLKHNHGMUAPQ-UHFFFAOYSA-N	O=C(OC(C)C(O)C1=CC=C(OC)C=C1)C2=CC=C(OC)C=C2	34.479	0.00069947	70.878	0.013688	37.787	5.73e-05	1.12444	1.01946	1.23808	0.96528	0.888889	0.885417
282	Positive	6.831	520.177	low score: NCGC00380203-01_C26H30ClNO8_2-{7-Acetoxy-5-chloro-3-[(1E,3E)-3,5-dimethyl-1,3-heptadien-1-yl]-7-methyl-6,8-dioxo-7,8-dihydro-2(6H)-isoquinolinyl}pentanedioic acid	[M+H]+	C26H30ClNO8	Glutamic acid and derivatives	BVIXPBFQDINHQZ-XHBXSBNISA-N	CCC(C)\C=C(C)\C=C\C1=C\C/2=C(Cl)/C(=O)C(C)(OC(C)=O)C(=O)C2=C\N1C(CCC(O)=O)C(O)=O	20.983	7.14e-05	36.425	0.0045926	16.083	9.68e-05	1.3825	1.55274	1.38885	0.95139	0.9375	0.885417
283	Positive	12.593	225.202	low score: Dicyclohexylurea	[M+H]+	C13H24N2O	Ureas	ADFXKUOMJKEIND-UHFFFAOYSA-N	C1CCC(CC1)NC(=O)NC2CCCCC2	3.527	0.002151	2.7295	0.016749	2.9263	0.00011735	1.0387	1.07591	1.27591	0.90278	0.8125	0.885417
284	Positive	14.304	739.658	low score: (2E,6E)-3,7,11,15,19,23,27,31,35-nonamethylhexatriaconta-2,6,34-triene-1,11,15,19,23,27,31-heptol	[M+H]+	C45H86O7	Polyprenols	FPJJIWCMASJCHO-NXRGQNTBSA-N	OCC=C(C)CCC=C(C)CCCC(O)(C)CCCC(O)(C)CCCC(O)(C)CCCC(O)(C)CCCC(O)(C)CCCC(O)(C)CCC=C(C)C	200.18	0.00013354	444.46	0.010533	139.56	0.00012329	1.49316	1.40259	1.39777	0.9375	0.902778	0.885417
285	Positive	6.278	481.298	low score: Emetine	[M+2Na-H]+	C29H40N2O4	Emetine alkaloids	AUVVAXYIELKVAI-CKBKHPSWSA-N	CC[C@H]1CN2CCC3=CC(OC)=C(OC)C=C3[C@@H]2C[C@@H]1C[C@H]1NCCC2=CC(OC)=C(OC)C=C12	14.284	0.0011566	30.779	0.0078906	9.4551	0.00012478	1.1551	1.25607	1.30964	0.84028	0.881944	0.885417
286	Positive	0.189	519.172	no MS2: [(2S,3S,4R,5R)-4-hydroxy-2,5-bis(hydroxymethyl)-2-[(2R,3R,4S,5S,6R)-3,4,5-trihydroxy-6-(hydroxymethyl)oxan-2-yl]oxyoxolan-3-yl] (E)-3-(4-hydroxy-3-methoxyphenyl)prop-2-enoate	[M+H]+	C22H30O14	Coumaric acids and derivatives	ZPEADZHVGOCGKH-YQTDNFGYSA-N	O=C(OC1C(O)C(OC1(OC2OC(CO)C(O)C(O)C2O)CO)CO)C=CC3=CC=C(O)C(OC)=C3	60.24	0.00038288	74.404	0.0070727	55.611	0.00026171	1.35629	1.47764	1.093	0.92361	0.909722	0.880208
287	Positive	0.742	396.114	low score: 2-(5,11-dioxoisoindolo[2,1-a]quinazolin-6(5H,6aH,11H)-yl)-N-(1H-pyrazol-4-yl)acetamide	[M+Na]+	C20H15N5O3	Indoloquinazolines	QYGUYHZAAVMQBV-UHFFFAOYSA-N	O=C(NC=1C=NNC1)CN2C(=O)C=3C=CC=CC3N4C(=O)C=5C=CC=CC5C42	28.905	0.0002892	48.383	0.010534	25.425	0.00011425	1.71795	1.41797	1.45701	0.90278	0.881944	0.875
288	Positive	14.299	371.128	no MS2: Ajugol	[M+Na]+	C15H24O9	Iridoid O-glycosides	VELYAQRXBJLJAK-XKKWFBPMSA-N	OCC1OC(OC2OC=CC3C(O)CC(O)(C)C23)C(O)C(O)C1O	43.147	0.0015888	33.69	0.012018	38.273	0.00012979	1.21177	1.35247	1.12076	0.85417	0.805556	0.875
289	Positive	19.568	371.129	no MS2: Ajugol	[M+Na]+	C15H24O9	Iridoid O-glycosides	VELYAQRXBJLJAK-XKKWFBPMSA-N	OCC1OC(OC2OC=CC3C(O)CC(O)(C)C23)C(O)C(O)C1O	66.204	0.00091363	80.18	0.011472	72.357	0.00013792	1.11229	1.20325	1.08174	0.91667	0.895833	0.875
290	Positive	15	281.068	no MS2: Yangonin	[M+Na]+	C15H14O4	Kavalactones	XLHIYUYCSMZCCC-VMPITWQZSA-N	O=C1OC(C=CC2=CC=C(OC)C=C2)=CC(OC)=C1	3.4752	0.001869	2.9454	0.0040875	3.9887	0.00022036	1.14563	1.68366	1.13141	0.83333	0.930556	0.875
291	Positive	17.973	519.174	no MS2: [(2S,3S,4R,5R)-4-hydroxy-2,5-bis(hydroxymethyl)-2-[(2R,3R,4S,5S,6R)-3,4,5-trihydroxy-6-(hydroxymethyl)oxan-2-yl]oxyoxolan-3-yl] (E)-3-(4-hydroxy-3-methoxyphenyl)prop-2-enoate	[M+H]+	C22H30O14	Coumaric acids and derivatives	ZPEADZHVGOCGKH-YQTDNFGYSA-N	O=C(OC1C(O)C(OC1(OC2OC(CO)C(O)C(O)C2O)CO)CO)C=CC3=CC=C(O)C(OC)=C3	145.33	0.00083653	144.93	0.01104	143.81	0.00029771	1.02912	1.24733	1.02216	0.94444	0.826389	0.875
292	Positive	14.113	124.096	no MS2: HISTIDINOL	[M-H2O+H]+	C6H11N3O	Aralkylamines	ZQISRDCJNBUVMM-YFKPBYRVSA-N	N[C@H](CO)CC1=CN=CN1	8.1374	0.00053113	6.4428	0.011433	9.0641	0.0005028	1.70439	1.60153	1.09715	0.87153	0.847222	0.875
293	Positive	6.444	472.305	low score: GLYCOCHENODEOXYCHOLATE	[M+Na]+	C26H43NO5	Glycinated bile acids and derivatives	GHCZAUBVMUEKKP-UHFFFAOYSA-N	CC(CCC(=O)NCC(=O)O)C1CCC2C1(CCC3C2C(CC4C3(CCC(C4)O)C)O)C	4.0385	0.00020136	6.2879	0.004978	4.0449	0.00065845	1.43372	1.41522	1.08205	0.98611	0.944444	0.875
294	Positive	15.008	297.101	no MS2: OCP_297.1002_16.5	[M+H]+	C14H17ClN2O3	Phenylpiperazines	FMKKWAHJJLLAOW-UHFFFAOYSA-N	OC(=O)CCC(=O)N1CCN(CC1)c1ccccc1Cl	3.7128	0.0038231	3.1821	0.0025408	4.1393	0.00069568	1.1513	1.62463	1.07849	0.83333	0.965278	0.875
295	Positive	15.355	298.103	low score: ACTIPHENOL	[M+Na]+	C15H17NO4	Alkyl-phenylketones	YTLMIHBTPWTPEV-UHFFFAOYSA-N	O=C1N=C(O)CC(C1)CC(=O)C=2C=C(C=C(C2O)C)C	2.9607	0.0038231	2.5883	0.0038893	3.2671	0.0011415	1.14772	1.74134	1.03155	0.83333	0.923611	0.875
296	Positive	0.365	215.14	low score: Unknown (carbon number 10); PlaSMA ID-798	[M+H]+	C10H18N2O3	Unknown	null	null	3.7094	0.00071818	3.2628	0.019457	3.9984	0.00014221	1.54767	1.26527	1.47343	0.82639	0.805556	0.864583
297	Positive	14.304	519.173	no MS2: 3,5-dihydroxy-2-(4-hydroxyphenyl)-8-(3-methylbut-2-en-1-yl)-7-(((2S,3R,4S,5S,6R)-3,4,5-trihydroxy-6-(hydroxymethyl)tetrahydro-2H-pyran-2-yl)oxy)chroman-4-one	[M+H]+	C26H30O11	Flavonoid-7-O-glycosides	GRDZTDZJQRPNCN-GHYODRBMSA-N	O=C1C2=C(O)C=C(OC3OC(CO)C(O)C(O)C3O)C(=C2OC(C4=CC=C(O)C=C4)C1O)CC=C(C)C	74.426	0.00098965	72.638	0.0075541	59.082	0.00051555	1.15269	1.5298	1.05296	0.875	0.944444	0.84375
298	Positive	6.455	421.27	low score: Maytenin	[M+H]+	C28H36O3	Cyclic ketones	WSTYNZDAOAEEKG-JCNSEWGNSA-N	O=C1C[C@]2(C)CC[C@]3(C)C([C@@]4(C)CC[C@@]3(C)C2C[C@H]1C)=CC=C(C4=C5)C(C)=C(O)C5=O	15.909	0.00031966	28.02	0.0092813	18.517	0.00015644	1.65237	1.40737	1.49197	0.95833	0.881944	0.833333
299	Positive	0.244	371.126	no MS2: 1-[2-hydroxy-4-(3-hydroxy-5-methylphenoxy)-6-methylphenyl]-3-methylbutane-2,3-diol	[M+K]+	C19H24O5	Diphenylethers	FLLRZSQAKUHACV-UHFFFAOYSA-N	OC=1C=C(OC2=CC(O)=C(C(=C2)C)CC(O)C(O)(C)C)C=C(C1)C	45.735	0.00051468	44.053	0.010739	49.523	0.00019232	1.50114	1.44888	1.19368	0.93056	0.888889	0.833333
300	Positive	12.045	463.164	low score: Methylnissolin-3-O-glucoside	[M+H]+	C23H26O10	Pterocarpans	PCIXSTFFMHVOMF-UHFFFAOYSA-N	OCC1OC(OC2=CC=C3C(OCC4C5=CC=C(OC)C(OC)=C5OC34)=C2)C(O)C(O)C1O	7.1523	3.23e-05	16.558	0.0022364	6.5655	0.00064468	1.35846	1.22901	1.06155	0.95139	0.944444	0.833333
301	Positive	9.433	247.185	low score: Sophocarpine	[M+H]+	C15H22N2O	Matrine alkaloids	AAGFPTSOPGCENQ-JLNYLFASSA-N	C1C[C@H]2CN3[C@H](CC=CC3=O)[C@@H]4[C@H]2N(C1)CCC4	22.416	0.00091305	31.096	0.011258	23.904	0.00015239	1.39312	1.48641	1.28064	0.83333	0.819444	0.822917
302	Positive	7.726	393.313	low score: DEOXYCHOLIC ACID	[M+H]+	C24H40O4	Dihydroxy bile acids, alcohols and derivatives	KXGVEGMKQFWNSR-LLQZFEROSA-N	C[C@H](CCC(=O)O)[C@H]1CC[C@@H]2[C@@]1([C@H](C[C@H]3[C@H]2CC[C@H]4[C@@]3(CC[C@H](C4)O)C)O)C	8.7624	8.09e-05	10.787	0.0089724	7.8478	0.00016059	1.59941	1.41996	1.38978	1	0.923611	0.822917
303	Positive	6.443	354.274	low score: 14-hydroxy-14-(hydroxymethyl)-5,9-dimethyltetracyclo[11.2.1.0?,??.0?,?]hexadecane-5-carboxylic acid	[M+NH4]+	C20H32O4	Kaurane diterpenoids	MRBLTWPEPGRXQN-UHFFFAOYSA-N	O=C(O)C1(C)CCCC2(C)C1CCC34CC(CCC32)C(O)(CO)C4	4.1506	0.00036446	4.8379	0.010049	4.5127	0.00027898	1.55365	1.49485	1.29021	0.95139	0.840278	0.822917
304	Positive	6.241	786.346	low score: Rifaximin	[M+H]+	C43H51N3O11	Macrolactams	NZCRJKRKKOLAOJ-XRCRFVBUSA-N	C[C@H]1/C=C/C=C(\C(=O)NC2=C(C3=C(C4=C(C(=C3O)C)O[C@@](C4=O)(O/C=C/[C@@H]([C@H]([C@H]([C@@H]([C@@H]([C@@H]([C@H]1O)C)O)C)OC(=O)C)C)OC)C)C5=C2N6C=CC(=CC6=N5)C)O)/C	20.208	6.8e-05	76.069	0.010592	18.015	0.00053293	1.48125	1.04568	1.22828	0.93056	0.881944	0.822917
