# Supplementary material
Source: Research Square preprint supplement (doi:10.21203/rs.3.rs-9323973/v1)
Supplement: Supplementary file 5 [file a3f4384b76acce021196c117.xlsx]

## Sheet: Sheet1
Supplementary table S5 Pathway analysis of serum metabolites from each stage of RABV infection.
Pathway category	Pathway	Early infection			Late infection			Clinical infection
		Metabolite Sig. hit / Metabolite hit / Metaboite in pathway	p - value	List of Sig. metabolites	Metabolite Sig. hit / Metabolite hit / Metaboite in pathway	p - value	List of Sig. metabolites	Metabolite Sig. hit / Metabolite hit / Metaboite in pathway	p - value	List of Sig. metabolites
Lipid metabolism	Steroid biosynthesis	4 / 21 / 40	0.0089802	C15780;C05107;C15808;C15816;C22112;C22136	1 / 17 / 40	1	C22112	8 / 21 / 40	0.2152	C01189;C03845;C15780;C00187;C05107;C15808;C15816;C00751;C00448;C22112;C22136
	Biosynthesis of unsaturated fatty acids				1 / 7 / 36	1	C06425	6 / 10 / 36	0.041106	C00249;C01595;C03242;C06426;C06429;C06427
	Primary bile acid biosynthesis	4 / 17 / 46	0.0049599	C05454;C01301;C04554;C05452;C05444;C04722				8 / 16 / 46	0.070261	C00187;C05454;C01301;C04554;C05452;C05444;C04722;C01921
	Fatty acid elongation	1 / 2 / 28	1	C05276				2 / 2 / 28	0.070266	C05276;C00249
	Linoleic acid metabolism	1 / 1 / 4	1	C04717				2 / 2 / 4	0.070266	C01595;C04717
	Fatty acid degradation	1 / 3 / 35	1	C05276				2 / 3 / 35	0.12274	C00249;C05276
	Steroid hormone biosynthesis	3 / 43 / 79	0.16504	C05487;C05490;C05478				14 / 43 / 79	0.44576	C00187;C05485;C05138;C05487;C05139;C00410;C02140;C05488;C05497;C00280;C05299;C05297;C05294;C03852;C22831;C02373;C18038;C18040;C05490;C05478;C18075;C05285;C04518;C18045
	Fatty acid biosynthesis							1 / 3 / 9	1	C00249
	Glycerolipid metabolism	1 / 1 / 7	1	C00258				1 / 1 / 7	1	C00258
	Arachidonic acid metabolism							1 / 4 / 42	1	C02166
	alpha-Linolenic acid metabolism							1 / 3 / 12	1	C06427
	Sphingolipid metabolism							1 / 1 / 11	1	C01120
Amino acid metabolism	Cysteine and methionine metabolism							4 / 5 / 33	0.028823	C00021;C00491;C00957;C02218
	Lysine degradation	1 / 6 / 21	1	C16741				4 / 5 / 21	0.028823	C00449;C16741;C01149;C01181
	Tyrosine metabolism	1 / 7 / 42	1	C01061;C01036	1 / 7 / 42	1	C03758	4 / 9 / 42	0.14607	C05576;C03758;C01061;C01036;C05579
	Arginine and proline metabolism	1 / 4 / 35	1	C00750				2 / 5 / 35	0.24051	C00750;C00179
	Arginine biosynthesis							1 / 1 / 14	1	C00064
	Alanine, aspartate and glutamate metabolism							1 / 3 / 28	1	C00064
	Glycine, serine and threonine metabolism	1 / 4 / 31	1	C00258				1 / 5 / 31	1	C00258
	Valine, leucine and isoleucine degradation							1 / 6 / 35	1	C00407;C00123
	Valine, leucine and isoleucine biosynthesis							1 / 5 / 8	1	C00123;C00407
	Histidine metabolism							1 / 2 / 16	1	C05130
	Phenylalanine metabolism							1 / 1 / 10	1	C05332
	Tryptophan metabolism				1 / 9 / 41	1	C05642	1 / 10 / 41	1	C06212
Metabolism of other amino acids	Beta-Alanine metabolism	2 / 3 / 21	0.0043028	C00750;C00106				2 / 4 / 21	0.18109	C00750;C00106
	Selenocompound metabolism							2 / 2 / 16	0.070266	C05688;C05699
	Glutathione metabolism	1 / 5 / 19	1	C00750				2 / 5 / 19	0.24051	C02090;C00750
	Phosphonate and phosphinate metabolism							1 / 1 / 4	1	C03557
	D-Amino acid metabolism							1 / 1 / 15	1	C00819
Nucleotide metabolism	Pyrimidine metabolism	1 / 6 / 39	1	C00106	1 / 4 / 39	1	C00063	4 / 10 / 39	0.1886	C00064;C00460;C00526;C21029;C00106
	Purine metabolism							4 / 10 / 71	0.1886	C00064;C04734;C00559;C00242;C22499
Carbohydrate metabolism	Pentose phosphate pathway	1 / 4 / 23	1	C00258				2 / 4 / 23	0.18109	C01236;C00258
	Glyoxylate and dicarboxylate metabolism	1 / 1 / 31	1	C00258				2 / 4 / 31	0.18109	C00258;C00064
	Inositol phosphate metabolism							2 / 8 / 21	0.40452	C11555;C01272;C04477;C04520;C01284
	Fructose and mannose metabolism							1 / 3 / 18	1	C01019
Glycan biosynthesis and metabolism	Amino sugar and nucleotide sugar metabolism							2 / 4 / 39	0.18109	C01019;C00329
	Glycerophospholipid metabolism	1 / 5 / 13	1	C00189				2 / 4 / 13	0.18109	C01996;C00189
	Glycosylphosphatidylinositol (GPI)-anchor biosynthesis							1 / 1 / 4	1	C00249
	Mannose type O-glycan biosynthesis				1 / 1 / 3	1	C00063
Energy metabolism	Nitrogen metabolism							1 / 1 / 6	1	C00064
Metabolism of cofactors and vitamins	Ubiquinone and other terpenoid-quinone biosynthesis	2 / 2 / 7	0.0029718	C03313;C05849				2 / 2 / 7	0.070266	C03313;C05849
	Retinol metabolism	1 / 4 / 15	1	C16677;C16680;C16679				3 / 4 / 15	0.054181	C15492;C16677;C16680;C16679
	Nicotinate and nicotinamide metabolism							3 / 5 / 15	0.088831	C03722;C02918;C05843;C05842
	One carbon pool by folate				1 / 3 / 26	1	C00440	1 / 6 / 26	1	C00021
	Vitamin B6 metabolism							1 / 1 / 9	1	C00647
	Pantothenate and CoA biosynthesis	1 / 3 / 18	1	C00106				1 / 2 / 18	1	C00106
	Folate biosynthesis				1 / 2 / 26	1	C09332	1 / 4 / 26	1	C03684;C00835
	Porphyrin metabolism	1 / 1 / 29	1	C01079				1 / 4 / 29	1	C01079
Metabolism of terpenoids and polyketides	Terpenoid backbone biosynthesis							1 / 3 / 14	1	C00448
Xenobiotics biodegradation and metabolism	Drug metabolism - other enzymes				1 / 2 / 28	1	C11173	2 / 3 / 28	0.12274	C16631;C11173
	Metabolism of xenobiotics by cytochrome P450							1 / 3 / 64	1	C06205
	Drug metabolism - cytochrome P450							1 / 8 / 21	1	C16545
