# Supplementary material
Source: Research Square preprint supplement (doi:10.21203/rs.3.rs-9323973/v1)
Supplement: Supplementary file 6 [file d6daff20ec3bb8609a63a1c0.xlsx]

## Sheet: Sheet1
Supplementary table S2. The significantly different putative metabolites from early RABV infection (ranked by smallest adjusted p-value)
No.	Ionization mode	Average RT (min)	Average MZ	Metabolite name	Adduct type	Chemical formula	Ontology	INCHIKEY	SMILES	Fold change	Adjusted p-value	VIP score from oPLS-DA model
1	Positive	8.842	612.287	no MS2: Benzoylmesaconine	[M+Na]+	C31H43NO10	Aconitane-type diterpenoid alkaloids	PULWZCUZNRVAHT-PUAFOYDXSA-N	O=C(OC1C2C3CC1(O)C(OC)C(O)C2(O)C4C(OC)C5C6(COC)CN(C)C4C35C(OC)CC6O)C=7C=CC=CC7	43.05	6.27e-17	2.57225
2	Positive	8.779	523.411	Unknown	[M+H]+	null	null	null	null	0.040021	1.42e-13	2.27546
3	Negative	0.078	197.799	Unknown	[M-H]-	null	null	null	null	0.051515	2.24e-13	2.39544
4	Negative	0.077	195.802	Unknown	[M-H]-	null	null	null	null	0.051147	3.36e-13	2.38815
5	Negative	0.077	199.796	Unknown	[M-H]-	null	null	null	null	0.049022	1.71e-12	2.37599
6	Negative	0.079	162.831	Unknown	[M-H]-	null	null	null	null	0.04992	3.64e-12	2.40733
7	Negative	0.079	160.835	Unknown	[M-H]-	null	null	null	null	0.050444	4.89e-12	2.37516
8	Positive	9.655	544.403	Unknown	[M+H]+	null	null	null	null	0.044442	2.59e-11	2.3004
9	Positive	18.087	758.652	Unknown	[M+H]+	null	null	null	null	0.029738	4.95e-10	2.23233
10	Positive	10.767	325.258	Unknown	[M+H]+	null	null	null	null	0.17364	9.84e-10	2.01472
11	Positive	14.308	806.646	Unknown	[M+H]+	null	null	null	null	0.17578	4.44e-09	1.97787
12	Positive	11.51	325.26	Unknown	[M+H]+	null	null	null	null	0.091173	1.4e-08	2.09051
13	Positive	1.331	297.094	low score: OCP_297.1002_16.5	[M+H]+	C14H17ClN2O3	Phenylpiperazines	FMKKWAHJJLLAOW-UHFFFAOYSA-N	OC(=O)CCC(=O)N1CCN(CC1)c1ccccc1Cl	9.4555	1.92e-08	2.11665
14	Positive	12.039	336.353	Unknown	[M+H]+	null	null	null	null	0.11596	1.92e-08	1.92817
15	Positive	0.344	516.475	Unknown	[M+H]+	null	null	null	null	0.047837	2.48e-08	1.94302
16	Positive	10.311	365.169	low score: 7,8-Dihydroxy calonectrin	[M+Na]+	C19H26O8	Trichothecenes	JSKXQQKSUOVSKS-UHFFFAOYSA-N	CC1=CC2C(C(C1O)O)(C3(CC(C(C34CO4)O2)OC(=O)C)C)COC(=O)C	0.082932	2.48e-08	1.94086
17	Positive	15.495	782.639	Unknown	[M+H]+	null	null	null	null	0.075749	2.48e-08	2.22721
18	Positive	14.539	782.638	Unknown	[M+H]+	null	null	null	null	0.08968	2.71e-08	2.09643
19	Positive	19.329	806.642	Unknown	[M+H]+	null	null	null	null	0.047909	3.09e-08	2.22529
20	Positive	7.104	970.459	Unknown	[M+H]+	null	null	null	null	0.064679	9.51e-08	2.10199
21	Positive	16.712	780.624	Unknown	[M+H]+	null	null	null	null	0.05983	9.98e-08	2.08271
22	Positive	15.52	780.622	Unknown	[M+H]+	null	null	null	null	0.082617	1.03e-07	1.91729
23	Positive	18.755	758.639	Unknown	[M+H]+	null	null	null	null	0.060154	1.06e-07	2.13593
24	Positive	16.122	780.621	Unknown	[M+H]+	null	null	null	null	0.062671	1.06e-07	1.96295
25	Positive	18.578	782.637	Unknown	[M+H]+	null	null	null	null	0.064481	1.06e-07	2.08952
26	Positive	7.061	972.685	Unknown	[M+H]+	null	null	null	null	0.058758	1.06e-07	2.16095
27	Positive	8.787	814.062	Unknown	[M+H]+	null	null	null	null	0.059476	1.11e-07	2.12118
28	Positive	10.308	388.248	low score: (1r,5R,7S)-5,7-diethyl-2-(1-ethyl-2-methyl-1H-indol-3-yl)-1,3-diazaadamantan-6-one	[M+Na]+	C23H31N3O	N-alkylindoles	KRYFHYSXWHRZKT-BRTIRZTQSA-N	O=C1C2(CN3CC1(CN(C2)C3C=4C=5C=CC=CC5N(C4C)CC)CC)CC	0.080184	1.18e-07	2.14379
29	Positive	11.926	380.381	Unknown	[M+H]+	null	null	null	null	0.081027	1.41e-07	1.9464
30	Positive	10.864	842.104	Unknown	[M+H]+	null	null	null	null	0.061646	1.41e-07	2.16507
31	Positive	16.058	708.627	Unknown	[M+H]+	null	null	null	null	0.077046	1.56e-07	2.16315
32	Positive	15.244	752.652	Unknown	[M+H]+	null	null	null	null	0.086419	1.56e-07	2.20437
33	Positive	10.568	163.09	Unknown	[M+H]+	null	null	null	null	0.10575	1.56e-07	2.14369
34	Positive	15.521	758.637	Unknown	[M+H]+	null	null	null	null	0.049554	1.56e-07	1.95038
35	Positive	14.908	780.626	Unknown	[M+H]+	null	null	null	null	0.099996	1.56e-07	1.83995
36	Positive	19.515	806.64	Unknown	[M+H]+	null	null	null	null	0.066881	1.56e-07	2.2681
37	Positive	7.101	970.568	Unknown	[M+H]+	null	null	null	null	0.081996	1.56e-07	2.20067
38	Negative	12.061	327.219	low score: (10E,15Z)-9,12,13-trihydroxyoctadeca-10,15-dienoic acid	[M-H]-	C18H32O5	Lineolic acids and derivatives	MKYUCBXUUSZMQB-MKZMYESJSA-N	O=C(O)CCCCCCCC(O)C=CC(O)C(O)CC=CCC	2.784	1.56e-07	1.57462
39	Positive	7.099	970.678	Unknown	[M+H]+	null	null	null	null	0.08036	1.95e-07	2.05606
40	Positive	8.788	566.369	low score: "1,2-DIDECANOYL-SN-GLYCERO-3-PHOSPHOCHOLINE"	[M+H]+	C28H56NO8P	Phosphatidylcholines	MLKLDGSYMHFAOC-AREMUKBSSA-N	CCCCCCCCCC(=O)OC[C@H](COP(=O)([O-])OCC[N+](C)(C)C)OC(=O)CCCCCCCCC	0.1078	2.14e-07	2.19503
41	Positive	5.531	297.097	no MS2: OCP_297.1002_16.5	[M+H]+	C14H17ClN2O3	Phenylpiperazines	FMKKWAHJJLLAOW-UHFFFAOYSA-N	OC(=O)CCC(=O)N1CCN(CC1)c1ccccc1Cl	5.3265	2.14e-07	1.87952
42	Positive	10.565	365.17	low score: Magnoflorine	[M+Na]+	C20H24NO4	Aporphines	YLRXAIKMLINXQY-ZDUSSCGKSA-O	OC=1C(OC)=CC=C2C1C=3C(O)=C(OC)C=C4C3C(C2)[N+](C)(C)CC4	0.091151	2.2e-07	2.08396
43	Positive	19.609	807.644	Unknown	[M+H]+	null	null	null	null	0.074693	2.2e-07	2.20455
44	Positive	7.063	875.213	Unknown	[M+H]+	null	null	null	null	0.070695	2.2e-07	2.24339
45	Positive	8.753	520.438	no MS2: "2alpha-acetoxy-3beta,22alpha-stictandiol"	[M+NH4]+	C32H54O4	Sesquiterpenoids	QZWMMIGRNYLXMG-XDRJWLFLSA-N	CC1(C)C2CC[C@@]3(C)C(CCC4C3(CCC3[C@@H](O)C(C)(C)CCC43C)C)C2(C)CC(OC(=O)C)C1O	0.12136	2.24e-07	1.62837
46	Positive	9.513	317.147	no MS2: Loureirin B	[M+H]+	C18H20O5	Retro-dihydrochalcones	ZPFRAPVRYLGYEC-UHFFFAOYSA-N	O=C(C1=CC=C(O)C=C1)CCC=2C(OC)=CC(OC)=CC2OC	0.17308	2.24e-07	1.88501
47	Positive	15.985	782.635	Unknown	[M+H]+	null	null	null	null	0.09904	2.24e-07	2.23532
48	Positive	19.623	806.64	Unknown	[M+H]+	null	null	null	null	0.073841	2.24e-07	2.17991
49	Positive	7.064	875.316	low score: NCGC00385098-01![8,8-dimethyl-9-(3-methylbut-2-enoyloxy)-2-oxo-9,10-dihydropyrano[2,3-f]chromen-10-yl] 3-methylbut-2-enoate [IIN-based on: CCMSLIB00000846416]	[2M+Na]+	C24H26O7	Angular pyranocoumarins	UHWIZIJICYWABA-UHFFFAOYSA-N	CC(C)=CC(=O)OC1C(OC(=O)C=C(C)C)C(C)(C)OC2=CC=C3C=CC(=O)OC3=C12	0.075306	2.24e-07	2.05504
50	Positive	8.775	544.387	Unknown	[M+H]+	null	null	null	null	0.094426	2.4e-07	1.92307
51	Positive	8.11	956.617	Unknown	[M+H]+	null	null	null	null	0.054445	2.4e-07	1.90534
52	Positive	7.065	972.234	Unknown	[M+H]+	null	null	null	null	0.076259	2.4e-07	2.08339
53	Positive	7.066	972.349	low score: (NAG)(NAM)-AemC	[M+H]+	C37H61N7O21S	Oligopeptides	JLDNMWCWVRSBND-UHFFFAOYSA-N	CC(=O)NC1C(OC2C(CO)OC(O)C(NC(C)=O)C2OC(C)C(=O)NC(C)C(=O)NC(CCC(=O)NC(CCCC(N)C(=O)O)C(=O)NC(CS)C(=O)O)C(=O)O)OC(CO)C(O)C1O	0.074644	2.4e-07	2.14544
54	Positive	0.029	759.639	Unknown	[M+H]+	null	null	null	null	0.097578	2.7e-07	2.10211
55	Positive	18.891	759.642	Unknown	[M+H]+	null	null	null	null	0.0784	2.72e-07	2.14299
56	Positive	11.753	380.383	Unknown	[M+H]+	null	null	null	null	0.073635	2.73e-07	1.96874
57	Positive	8.843	310.265	low score: Bentyl	[M+Na]+	C19H35NO2	Carboxylic acid esters	CURUTKGFNZGFSE-UHFFFAOYSA-N	CCN(CC)CCOC(=O)C1(CCCCC1)C2CCCCC2	0.11103	2.73e-07	1.74553
58	Positive	10.311	343.188	low score: 9-phenyl-1-(2,4,6-trihydroxyphenyl)nonan-1-one	[M+H]+	C21H26O4	Alkyl-phenylketones	OOGZWXIAHJKVAH-UHFFFAOYSA-N	O=C(C=1C(O)=CC(O)=CC1O)CCCCCCCCC=2C=CC=CC2	0.16012	2.73e-07	1.89197
59	Positive	9.266	766.058	Unknown	[M+H]+	null	null	null	null	0.079486	2.8e-07	2.189
60	Positive	9.496	540.414	Unknown	[M+H]+	null	null	null	null	0.10564	2.82e-07	1.96885
61	Positive	9.53	380.38	Unknown	[M+H]+	null	null	null	null	0.13178	2.99e-07	1.87727
62	Positive	16.867	780.62	Unknown	[M+H]+	null	null	null	null	0.085068	2.99e-07	2.00088
63	Positive	19.452	807.642	Unknown	[M+H]+	null	null	null	null	0.076579	2.99e-07	2.11358
64	Positive	7.067	972.569	Unknown	[M+H]+	null	null	null	null	0.081496	2.99e-07	2.03723
65	Positive	8.774	542.686	Unknown	[M+H]+	null	null	null	null	0.11514	3.06e-07	1.84185
66	Positive	8.465	302.174	no MS2: octyltyrazolone	[M+H]+	C18H23NO3	Alpha amino acids and derivatives	LETLVQJZVBVGKT-SSZFMOIBSA-N	OC1=CC=C(/C=C2N=C(CCCCCCCC)OC\2=O)C=C1	0.23855	3.23e-07	1.96578
67	Positive	12.036	314.372	Unknown	[M+H]+	null	null	null	null	0.053302	3.29e-07	1.88448
68	Positive	11.021	317.148	low score: MMV392832	[M+H]+	C19H16N4O	Phenylpyrroles	SCLHBVYXOLVAFF-UHFFFAOYSA-N	N=1C=CC=C(C1)NC2=NC=CC=3NC(=CC23)C4=CC=CC(OC)=C4	0.15786	3.29e-07	1.95335
69	Positive	14.911	758.634	Unknown	[M+H]+	null	null	null	null	0.15607	3.29e-07	1.64835
70	Positive	18.259	758.636	Unknown	[M+H]+	null	null	null	null	0.081987	3.29e-07	2.15855
71	Positive	13.484	782.638	Unknown	[M+H]+	null	null	null	null	0.14528	3.29e-07	1.6175
72	Positive	14.532	780.621	Unknown	[M+H]+	null	null	null	null	0.19727	3.47e-07	1.64659
73	Positive	7.068	972.789	Unknown	[M+H]+	null	null	null	null	0.086895	3.52e-07	2.10721
74	Positive	15.614	464.417	Unknown	[M+H]+	null	null	null	null	0.090021	3.57e-07	2.19507
75	Positive	10.573	343.186	low score: 9-phenyl-1-(2,4,6-trihydroxyphenyl)nonan-1-one	[M+H]+	C21H26O4	Alkyl-phenylketones	OOGZWXIAHJKVAH-UHFFFAOYSA-N	O=C(C=1C(O)=CC(O)=CC1O)CCCCCCCCC=2C=CC=CC2	0.11463	3.59e-07	2.09536
76	Positive	18.519	708.576	Unknown	[M+H]+	null	null	null	null	0.083805	3.66e-07	1.93495
77	Positive	16.699	782.635	Unknown	[M+H]+	null	null	null	null	0.10075	3.67e-07	2.16091
78	Positive	10.572	388.248	low score: (1r,5R,7S)-5,7-diethyl-2-(1-ethyl-2-methyl-1H-indol-3-yl)-1,3-diazaadamantan-6-one	[M+Na]+	C23H31N3O	N-alkylindoles	KRYFHYSXWHRZKT-BRTIRZTQSA-N	O=C1C2(CN3CC1(CN(C2)C3C=4C=5C=CC=CC5N(C4C)CC)CC)CC	0.095704	3.7e-07	2.19821
79	Positive	15.515	808.656	Unknown	[M+H]+	null	null	null	null	0.096869	3.7e-07	2.13014
80	Positive	16.448	758.637	Unknown	[M+H]+	null	null	null	null	0.055423	3.91e-07	2.08507
81	Positive	18.343	876.637	Unknown	[M+H]+	null	null	null	null	0.070814	3.91e-07	1.779
82	Positive	0.608	332.311	Unknown	[M+H]+	null	null	null	null	0.14524	3.98e-07	2.01757
83	Positive	14.54	758.636	Unknown	[M+H]+	null	null	null	null	0.22432	3.98e-07	1.66394
84	Positive	13.582	398.271	no MS2: Phytosphingosine-1-P	[M+H]+	C18H40NO6P	Phosphosphingolipids	AYGOSKULTISFCW-KZNAEPCWSA-N	CCCCCCCCCCCCCC[C@H]([C@@H]([C@@H](COP(=O)(O)O)N)O)O	0.11363	4.02e-07	2.10278
85	Positive	16.041	758.636	Unknown	[M+H]+	null	null	null	null	0.049709	4.1e-07	2.0382
86	Positive	9.836	572.422	Unknown	[M+H]+	null	null	null	null	0.11307	4.32e-07	2.13019
87	Positive	7.404	340.262	low score: ormosanine	[M+Na]+	C20H35N3	Ormosia-type alkaloids	YUKCLPPRYNXRAF-CPPNMTBBSA-N	N1CCCCC1C23CN4CCCCC4C(CC5CCCNC52)C3	0.1548	4.32e-07	1.97675
88	Positive	6.714	400.253	low score: karakoline	[M+Na]+	C22H35NO4	Aconitane-type diterpenoid alkaloids	HKQZUYOVMYOFIT-IRAFXRDMSA-N	OC1CCC2(C)CN(CC)C3C4CC2C13C5CC6C(O)C5C4(O)CC6OC	0.41924	4.32e-07	1.75222
89	Positive	0.293	807.645	Unknown	[M+H]+	null	null	null	null	0.10646	4.32e-07	2.23885
90	Positive	9.414	437.41	Unknown	[M+H]+	null	null	null	null	0.070469	4.41e-07	1.71967
91	Positive	0.148	726.602	Unknown	[M+H]+	null	null	null	null	0.072253	4.41e-07	1.91936
92	Positive	8.835	288.281	low score: C17-Sphinganine	[M+H]+	C17H37NO2	1,2-aminoalcohols	KFQUQCFJDMSIJF-UHFFFAOYSA-N	CCCCCCCCCCCCCCC(C(CO)N)O	0.10007	4.41e-07	2.00919
93	Positive	12.079	355.32	Unknown	[M+H]+	null	null	null	null	0.14602	4.41e-07	1.67033
94	Positive	0.621	154.978	Unknown	[M+H]+	null	null	null	null	5.2977	4.41e-07	1.80071
95	Positive	14.536	806.639	Unknown	[M+H]+	null	null	null	null	0.19484	4.41e-07	1.9383
96	Positive	19.259	807.64	Unknown	[M+H]+	null	null	null	null	0.084694	4.41e-07	2.10279
97	Negative	10.9	197.8	Unknown	[M-H]-	null	null	null	null	0.48935	4.41e-07	1.53769
98	Positive	0.404	494.847	Unknown	[M+H]+	null	null	null	null	7.4172	4.42e-07	1.66437
99	Negative	10.999	197.799	Unknown	[M-H]-	null	null	null	null	0.48147	4.42e-07	1.53094
100	Positive	12.928	782.638	Unknown	[M+H]+	null	null	null	null	0.16456	4.49e-07	1.46455
101	Positive	14.91	782.639	Unknown	[M+H]+	null	null	null	null	0.12191	4.94e-07	2.08661
102	Negative	0.194	153.861	Unknown	[M-H]-	null	null	null	null	0.22812	5.07e-07	1.86417
103	Positive	0.702	332.311	Unknown	[M+H]+	null	null	null	null	0.15336	5.08e-07	2.07955
104	Positive	17.335	758.636	Unknown	[M+H]+	null	null	null	null	0.076841	5.25e-07	2.07518
105	Positive	9.24	527.37	low score: Dehydropachymic acid	[M+H]+	C33H50O5	Triterpenoids	RWIALJIVPUCERT-DRCQUEPLSA-N	O=C(OC1CCC2(C3=CCC4(C)C(C(O)CC4(C3=CCC2C1(C)C)C)C(C(=O)O)CCC(=C)C(C)C)C)C	0.20843	5.35e-07	1.75203
106	Positive	18.979	516.471	Unknown	[M+H]+	null	null	null	null	0.1084	5.52e-07	2.13436
107	Positive	0.178	398.27	no MS2: Phytosphingosine-1-P	[M+H]+	C18H40NO6P	Phosphosphingolipids	AYGOSKULTISFCW-KZNAEPCWSA-N	CCCCCCCCCCCCCC[C@H]([C@@H]([C@@H](COP(=O)(O)O)N)O)O	0.12893	5.62e-07	1.89237
108	Positive	3.427	205.113	low score: 1-[4-hydroxy-3-(3-methylbut-2-enyl)phenyl]ethanone	[M+NH4]+	C13H16O2	Alkyl-phenylketones	QJAPFSSVKIZTMR-UHFFFAOYSA-N	O=C(C1=CC=C(O)C(=C1)CC=C(C)C)C	0.23654	5.63e-07	1.59615
109	Positive	9.435	570.392	low score: "(4R)-4-((3R,5S,7R,9S,10S,13R,14S,17R)-3,7-dihydroxy-10,13-dimethylhexadecahydro-1H-cyclopenta[a]phenanthren-17-yl)-N-methyl-N-((2S,3R,4R,5R)-2,3,4,5,6-pentahydroxyhexyl)pentanamide"	[M+H]+	C31H55NO8	Dihydroxy bile acids, alcohols and derivatives	KUXSAFRZQPYINU-SGWAQUIASA-N	C[C@H](CCC(N(C)C[C@H](O)[C@@H](O)[C@@H]([C@@H](CO)O)O)=O)[C@H]1CC[C@H]2[C@]3([H])[C@H](O)C[C@@H]4C[C@H](O)CC[C@]4(C)[C@H]3CC[C@@]21C	0.12722	5.65e-07	1.82628
110	Positive	9.065	570.407	low score: "(4R)-4-((3R,5S,7R,9S,10S,13R,14S,17R)-3,7-dihydroxy-10,13-dimethylhexadecahydro-1H-cyclopenta[a]phenanthren-17-yl)-N-methyl-N-((2S,3R,4R,5R)-2,3,4,5,6-pentahydroxyhexyl)pentanamide"	[M+H]+	C31H55NO8	Dihydroxy bile acids, alcohols and derivatives	KUXSAFRZQPYINU-SGWAQUIASA-N	C[C@H](CCC(N(C)C[C@H](O)[C@@H](O)[C@@H]([C@@H](CO)O)O)=O)[C@H]1CC[C@H]2[C@]3([H])[C@H](O)C[C@@H]4C[C@H](O)CC[C@]4(C)[C@H]3CC[C@@]21C	0.12556	5.67e-07	1.87204
111	Positive	12.216	408.407	Unknown	[M+H]+	null	null	null	null	0.12758	5.7e-07	1.9633
112	Positive	16.144	758.635	Unknown	[M+H]+	null	null	null	null	0.055915	5.7e-07	2.03312
113	Positive	11.753	358.4	Unknown	[M+H]+	null	null	null	null	0.077183	5.9e-07	2.02584
114	Positive	9.952	352.354	Unknown	[M+H]+	null	null	null	null	0.086761	5.9e-07	1.93167
115	Positive	13.485	783.643	Unknown	[M+H]+	null	null	null	null	0.16956	5.9e-07	1.70883
116	Positive	8.692	590.37	Unknown	[M+H]+	null	null	null	null	0.11782	6e-07	2.13318
117	Positive	8.691	502.335	low score: (2R,3S,4S,5S,6R)-2-[[7-hydroxy-4-[(Z)-5-hydroxy-3-methylpent-3-enyl]-4a,8,8-trimethyl-3-methylidene-2,4,5,6,7,8a-hexahydro-1H-naphthalen-2-yl]oxy]-6-(hydroxymethyl)oxane-3,4,5-triol	[M+NH4]+	C26H44O8	Diterpene glycosides	JECOCDKQCZSANH-RFKAOMIISA-N	OCC=C(C)CCC1C(=C)C(OC2OC(CO)C(O)C(O)C2O)CC3C(C)(C)C(O)CCC13C	0.14224	6.17e-07	1.90144
118	Positive	11.916	644.552	Unknown	[M+H]+	null	null	null	null	0.12399	6.51e-07	1.98126
119	Positive	19.828	441.339	low score: NCGC00169592-02_C29H46O4_3aH-Cyclopenta[a]chrysene-3a-carboxylic acid, 1-acetyleicosahydro-9-hydroxy-5a,5b,8,8,11a-pentamethyl-, (1R,3aS,5aR,5bR,9S,11aR)-	[M-H2O+H]+	C29H46O4	Oxosteroids	RVMPLOSJMIQORE-XPDAHERZSA-N	CC(=O)[C@@H]1CC[C@@]2(CC[C@]3(C)C(CCC4[C@@]5(C)CC[C@H](O)C(C)(C)C5CC[C@@]34C)C12)C(O)=O	0.11407	6.56e-07	2.20392
120	Positive	15.35	580.483	Unknown	[M+H]+	null	null	null	null	0.1004	6.79e-07	1.83129
121	Positive	8.348	288.279	low score: C17-Sphinganine	[M+H]+	C17H37NO2	1,2-aminoalcohols	KFQUQCFJDMSIJF-UHFFFAOYSA-N	CCCCCCCCCCCCCCC(C(CO)N)O	0.12324	6.79e-07	1.84642
122	Positive	7.066	875.411	low score: Waikialoid A_130022	[M+H]+	C52H54N6O7	Indolocarbazoles	WZHCMAFZIFECCV-LYUUMHETSA-N	CC1(C)C=CC2=C3C(C([C@@]4([H])C5(N6)C(C[C@]7(N(CCC7)C5=O)C6=O)C8(C)C)([C@@](C9(N%104)C(C[C@@]%11(N(CCC%11)C9=O)C%10=O)C%12(C)C)([H])C%13=C%12NC%14=C(C=CC(C)(C)O%15)C%15=CC=C%14%13)C8=[N+]3[O-])=CC=C2O1	0.094923	6.79e-07	2.07601
123	Positive	15.301	752.653	Unknown	[M+H]+	null	null	null	null	0.11227	6.83e-07	2.11793
124	Positive	7.061	972.456	Unknown	[M+H]+	null	null	null	null	0.1036	6.95e-07	2.02619
125	Positive	0.262	782.634	Unknown	[M+H]+	null	null	null	null	0.1142	6.98e-07	1.96831
126	Negative	13.472	255.221	Unknown	[M-H]-	null	null	null	null	2.3543	7.07e-07	1.5934
127	Positive	18.622	708.578	Unknown	[M+H]+	null	null	null	null	0.088425	7.23e-07	1.906
128	Positive	15.296	580.483	Unknown	[M+H]+	null	null	null	null	0.10158	7.23e-07	1.82564
129	Positive	10.85	808.107	Unknown	[M+H]+	null	null	null	null	0.097067	7.23e-07	2.01054
130	Positive	1.052	261.034	no MS2: MLS002154021-01!Ifosfamide3778-73-2	[M+H]+	C7H15Cl2N2O2P	Isofamides	HOMGKSMUEGBAAB-UHFFFAOYSA-N	O=P1(OCCCN1CCCl)NCCCl	0.26516	7.31e-07	1.80938
131	Positive	18.316	512.55	Unknown	[M+H]+	null	null	null	null	0.054744	7.31e-07	1.95041
132	Positive	12.633	904.668	Unknown	[M+H]+	null	null	null	null	0.06793	7.31e-07	1.71344
133	Positive	7.059	972.122	low score: 2-[(5S,25R,26R,29S,30S,31S)-13,14,15,18,19,20,31,35,36-nonahydroxy-2,10,23,28,32-pentaoxo-5-(3,4,5-trihydroxybenzoyloxy)-3,6,9,24,27,33-hexaoxaheptacyclo[28.7.1.0?,??.0?,??.0??,??.0??,??.0??,??]octatriaconta-1(38),11(16),12,14,17,19,21,34,36-nonaen-29-yl]acetic acid	[M+NH4]+	C41H30O27	Hydrolyzable tannins	HGJXAVROWQLCTP-YSNZXMJVSA-N	O=C(O)CC1C(=O)OC2C3OC(OC(=O)C4=CC(O)=C(O)C(O)=C4)C(OC(=O)C5=CC(O)=C(O)C=6OC(=O)C(O)C1C65)C2OC(=O)C7=CC(O)=C(O)C(O)=C7C=8C(O)=C(O)C(O)=CC8C(=O)OC3	0.097079	7.33e-07	2.00834
134	Positive	8.783	582.352	low score: NCGC00381175-01!3-hydroxy-2-[[3-[3-(3-hydroxy-6-methylheptanoyl)oxy-6-methylheptanoyl]oxy-8-methylnonanoyl]amino]propanoic acid	[M+Na]+	C29H53NO9	N-acyl-alpha amino acids	MWZPHNZNPKKSEI-UHFFFAOYSA-N	CC(C)CCCCC(CC(=O)NC(CO)C(O)=O)OC(=O)CC(CCC(C)C)OC(=O)CC(O)CCC(C)C	0.12425	7.38e-07	1.8283
135	Positive	10.218	590.434	Unknown	[M+H]+	null	null	null	null	0.11369	7.58e-07	1.89729
136	Positive	8.912	324.248	low score: Melophlin B/C/G/K/L/N/O	[M+H]+	C19H33NO3	N-alkylpyrrolidines	WBPPODSRZVXVJK-MSUUIHNZSA-N	CCCCCCCCCCCC/C(O)=C(C1=O)\C(C(N1C)C)=O	0.14133	7.58e-07	2.06179
137	Positive	1.844	412.864	Unknown	[M+H]+	null	null	null	null	15.032	7.6e-07	1.702
138	Positive	13.79	402.396	Unknown	[M+H]+	null	null	null	null	0.12361	8e-07	1.86168
139	Positive	7.104	970.34	low score: NCGC00385068-01!methyl 4-methoxy-2-[(2S,3R,4S,5S,6R)-3,4,5-trihydroxy-6-[[(2S,3R,4S,5R)-3,4,5-trihydroxyoxan-2-yl]oxymethyl]oxan-2-yl]oxybenzoate [IIN-based on: CCMSLIB00000848774]	[2M+NH4]+	C20H28O13	Phenolic glycosides	DZRVGBRAMLSZDQ-HSMQXHTESA-N	COC(=O)C1=CC=C(OC)C=C1O[C@@H]2O[C@H](CO[C@@H]3OC[C@@H](O)[C@H](O)[C@H]3O)[C@@H](O)[C@H](O)[C@H]2O	0.10578	8e-07	2.03397
140	Positive	11.889	336.354	Unknown	[M+H]+	null	null	null	null	0.13715	8.01e-07	1.79449
141	Positive	0.321	488.436	Unknown	[M+H]+	null	null	null	null	0.11108	8.01e-07	1.93814
142	Positive	14.139	540.494	Unknown	[M+H]+	null	null	null	null	0.18067	8.01e-07	2.04687
143	Positive	8.736	592.387	no MS2: Edpetiline	[M+Na]+	C33H53NO8	Steroidal saponins	DHQFYEJMFMYGCV-UHFFFAOYSA-N	O=C1CC2C3CCC4C(CN5CC(C)CCC5C4(O)C)C3CC2C6(C)CCC(OC7OC(CO)C(O)C(O)C7O)CC16	0.31256	8.01e-07	1.5403
144	Negative	0.379	153.862	Unknown	[M-H]-	null	null	null	null	0.26267	8.02e-07	2.03144
145	Positive	8.247	239.182	Unknown	[M+H]+	null	null	null	null	0.34731	8.49e-07	1.61713
146	Positive	8.388	239.182	Unknown	[M+H]+	null	null	null	null	0.31899	8.53e-07	1.61546
147	Positive	12.069	512.461	Unknown	[M+H]+	null	null	null	null	0.15288	8.6e-07	2.07337
148	Positive	13.477	703.639	Unknown	[M+H]+	null	null	null	null	0.090755	8.71e-07	1.66964
149	Positive	0.269	806.639	Unknown	[M+H]+	null	null	null	null	0.11976	9.07e-07	2.20048
150	Positive	8.751	997.71	Unknown	[M+H]+	null	null	null	null	0.11326	9.07e-07	1.69055
151	Negative	12.557	279.22	Unknown	[M-H]-	null	null	null	null	2.9551	9.07e-07	1.50636
152	Positive	0.486	342.929	Unknown	[M+H]+	null	null	null	null	0.1474	9.18e-07	2.02716
153	Positive	13.476	784.655	Unknown	[M+H]+	null	null	null	null	0.20516	9.38e-07	1.7317
154	Positive	9.291	496.41	Unknown	[M+H]+	null	null	null	null	0.1754	9.61e-07	1.34558
155	Positive	11.968	420.348	Unknown	[M+H]+	null	null	null	null	0.12252	9.68e-07	1.67929
156	Positive	13.444	464.414	Unknown	[M+H]+	null	null	null	null	0.11935	9.88e-07	2.05755
157	Positive	9.343	611.286	low score: (S)-ethyl 4-(4-((7-acetamido-1,2,3-trimethoxy-9-oxo-5,6,7,9-tetrahydrobenzo[a]heptalen-10-yl)amino)butanoyl)piperazine-1-carboxylate	[M+H]+	C32H42N4O8	Gamma amino acids and derivatives	SJHHSDDZARIHAT-DEOSSOPVSA-N	O=C(OCC)N1CCN(C(=O)CCCNC2=CC=C3C4=C(OC)C(OC)=C(OC)C=C4CCC(NC(=O)C)C3=CC2=O)CC1	43.132	1.02e-06	1.97128
158	Positive	14.065	328.351	Unknown	[M+H]+	null	null	null	null	0.092368	1.02e-06	1.87655
159	Positive	14.551	784.653	Unknown	[M+H]+	null	null	null	null	0.15332	1.02e-06	1.90013
160	Negative	10.819	195.802	Unknown	[M-H]-	null	null	null	null	0.4914	1.02e-06	1.41667
161	Negative	10.991	195.802	Unknown	[M-H]-	null	null	null	null	0.48805	1.02e-06	1.44797
162	Negative	13.774	281.236	Unknown	[M-H]-	null	null	null	null	2.4445	1.02e-06	1.59313
163	Positive	19.915	441.338	low score: NCGC00169592-02_C29H46O4_3aH-Cyclopenta[a]chrysene-3a-carboxylic acid, 1-acetyleicosahydro-9-hydroxy-5a,5b,8,8,11a-pentamethyl-, (1R,3aS,5aR,5bR,9S,11aR)-	[M-H2O+H]+	C29H46O4	Oxosteroids	RVMPLOSJMIQORE-XPDAHERZSA-N	CC(=O)[C@@H]1CC[C@@]2(CC[C@]3(C)C(CCC4[C@@]5(C)CC[C@H](O)C(C)(C)C5CC[C@@]34C)C12)C(O)=O	0.12349	1.03e-06	2.15162
164	Positive	9.1	317.146	no MS2: Loureirin B	[M+H]+	C18H20O5	Retro-dihydrochalcones	ZPFRAPVRYLGYEC-UHFFFAOYSA-N	O=C(C1=CC=C(O)C=C1)CCC=2C(OC)=CC(OC)=CC2OC	0.2113	1.03e-06	1.83339
165	Positive	19.842	806.635	Unknown	[M+H]+	null	null	null	null	0.11132	1.03e-06	2.20727
166	Positive	14.913	808.652	Unknown	[M+H]+	null	null	null	null	0.13591	1.03e-06	1.90159
167	Positive	12.197	314.366	Unknown	[M+H]+	null	null	null	null	0.081201	1.07e-06	1.77916
168	Positive	7.101	970.784	Unknown	[M+H]+	null	null	null	null	0.11572	1.07e-06	2.08641
169	Positive	8.06	274.299	Unknown	[M+H]+	null	null	null	null	0.12756	1.08e-06	2.04102
170	Positive	9.255	991.758	Unknown	[M+H]+	null	null	null	null	0.10671	1.08e-06	2.05066
171	Negative	0.194	155.858	Unknown	[M-H]-	null	null	null	null	0.23156	1.09e-06	1.85615
172	Positive	10.272	399.286	low score: Geranylgeranyl 1,4-hydroquinone	[M+H]+	C26H38O3	Diterpenoids	MYSSQNMFYDHCAT-FLPKSHQQSA-N	OC1=C(C/C=C(CC/C=C(C)/CC/C=C(C)/CC/C=C(C)\C)\C)C=C(O)C=C1O	0.29965	1.1e-06	1.71439
173	Positive	9.272	546.404	Unknown	[M+H]+	null	null	null	null	0.13208	1.1e-06	1.89432
174	Positive	15.27	633.192	low score: (S)-7-(((2S,3R,4S,5S,6R)-4,5-dihydroxy-6-(hydroxymethyl)-3-(((2S,3R,4R,5R,6S)-3,4,5-trihydroxy-6-methyltetrahydro-2H-pyran-2-yl)oxy)tetrahydro-2H-pyran-2-yl)oxy)-5-hydroxy-2-(3-hydroxy-5-methoxyphenyl)chroman-4-one	[M+Na]+	C28H34O15	Flavonoid-7-O-glycosides	TWAZWVPPDIUVOD-UZRWAPQLSA-N	O=C1C2=C(O)C=C(OC3OC(CO)C(O)C(O)C3OC4OC(C)C(O)C(O)C4O)C=C2OC(C=5C=C(O)C=C(OC)C5)C1	44.893	1.1e-06	1.9845
175	Positive	9.178	504.352	low score: NCGC00380972-01_C32H45N3O2_	[M+H]+	C32H45N3O2	Pyrroloindoles	IXMZEPKYPFQFJN-QNFIBVQNSA-N	CC(C)C[C@@H]1NC(=O)[C@@H]2C[C@]34C[C@@H]5[C@@]6(C)CCCC(C)(C)C6CC[C@@]5(C)N([C@H]3N2C1=O)C7=CC=CC=C47	0.20571	1.12e-06	1.73073
176	Positive	12.879	784.652	Unknown	[M+H]+	null	null	null	null	0.23035	1.12e-06	1.53021
177	Positive	13.354	714.67	Unknown	[M+H]+	null	null	null	null	0.12364	1.13e-06	1.97553
178	Positive	12.354	464.415	Unknown	[M+H]+	null	null	null	null	0.12457	1.14e-06	2.06408
179	Positive	13.797	395.291	low score: Unknown (carbon number 27); PlaSMA ID-2165	[M+K]+	C27H38O2	Unknown	null	null	0.15298	1.14e-06	1.90339
180	Positive	15.51	739.671	low score: (2E,6E)-3,7,11,15,19,23,27,31,35-nonamethylhexatriaconta-2,6,34-triene-1,11,15,19,23,27,31-heptol	[M+H]+	C45H86O7	Polyprenols	FPJJIWCMASJCHO-NXRGQNTBSA-N	OCC=C(C)CCC=C(C)CCCC(O)(C)CCCC(O)(C)CCCC(O)(C)CCCC(O)(C)CCCC(O)(C)CCCC(O)(C)CCC=C(C)C	0.10981	1.14e-06	1.88954
181	Positive	16.088	759.636	Unknown	[M+H]+	null	null	null	null	0.07689	1.14e-06	2.02706
182	Positive	9.078	436.381	Unknown	[M+H]+	null	null	null	null	0.16231	1.25e-06	1.92661
183	Positive	14.396	471.352	low score: glycyrrhetic acid	[M+H]+	C30H46O4	Triterpenoids	MPDGHEJMBKOTSU-YKLVYJNSSA-N	O=C(O)C1(C)CCC2(C)CCC3(C(=CC(=O)C4C5(C)CCC(O)C(C)(C)C5CCC43C)C2C1)C	0.11045	1.28e-06	1.84007
184	Positive	0.425	353.244	low score: "(R)-4-((3R,5S,8R,9S,10S,13R,14S,17R)-3-hydroxy-10,13-dimethyl-7-oxohexadecahydro-1H-cyclopenta[a]phenanthren-17-yl)pent-2-enoic acid"	[M-2H2O+H]+	C24H36O4	Oxosteroids	MEFHLJCGADQRRZ-NLMWUSBQSA-N	C[C@@H]([C@H]1CC[C@]2([H])[C@]1(C)CC[C@@]3([H])[C@@]2([H])C(C[C@@]4([H])[C@]3(C)CC[C@@H](O)C4)=O)/C=C/C(O)=O	16.038	1.31e-06	1.44897
185	Positive	10.859	562.366	Unknown	[M+H]+	null	null	null	null	0.1466	1.38e-06	2.06848
186	Positive	12.507	423.208	low score: Fludrocortisone	[M+H]+	C23H31FO6	Gluco/mineralocorticoids, progestogins and derivatives	SYWHXTATXSMDSB-GSLJADNHSA-N	O=C(OCC(=O)[C@]3(O)[C@]2(C[C@H](O)[C@]4(F)[C@@]1(/C(=C\C(=O)CC1)CC[C@H]4[C@@H]2CC3)C)C)C	40.367	1.39e-06	1.77555
187	Positive	18.638	701.618	Unknown	[M+H]+	null	null	null	null	0.13455	1.41e-06	2.06559
188	Positive	13.478	804.621	Unknown	[M+H]+	null	null	null	null	0.13758	1.41e-06	1.83217
189	Positive	8.701	568.38	Unknown	[M+H]+	null	null	null	null	0.12912	1.47e-06	1.84204
190	Positive	9.504	239.185	Unknown	[M+H]+	null	null	null	null	0.31296	1.47e-06	1.4881
191	Positive	0.739	233.873	Unknown	[M+H]+	null	null	null	null	48.964	1.52e-06	1.99071
192	Positive	11.904	358.395	Unknown	[M+H]+	null	null	null	null	0.10152	1.52e-06	1.95046
193	Positive	14.533	804.623	Unknown	[M+H]+	null	null	null	null	0.13475	1.52e-06	1.78212
194	Positive	0.378	784.649	Unknown	[M+H]+	null	null	null	null	0.11651	1.54e-06	1.72808
195	Positive	11.966	425.303	Unknown	[M+H]+	null	null	null	null	0.093556	1.56e-06	1.78673
196	Positive	10.31	163.09	Unknown	[M+H]+	null	null	null	null	0.21728	1.56e-06	1.84746
197	Positive	0.283	457.312	no MS2: Nakijiquinone H	[M+H]+	C26H40N4O3	Prenylquinones	UOJQVKJSJVULOG-UHFFFAOYSA-N	CC1=CCCC2C1(C)CCC(C)C2(C)CC3=C(O)C(C=C(NCCCCNC(N)=N)C3=O)=O	0.15153	1.57e-06	1.92937
198	Positive	14.779	350.36	Unknown	[M+H]+	null	null	null	null	0.15533	1.59e-06	2.13522
199	Positive	14.537	830.646	Unknown	[M+H]+	null	null	null	null	0.12726	1.66e-06	1.8763
200	Positive	0.628	213.907	Unknown	[M+H]+	null	null	null	null	50.274	1.68e-06	1.8774
201	Positive	9.053	302.172	low score: Dobutamine	[M+H]+	C18H23NO3	Catecholamines and derivatives	JRWZLRBJNMZMFE-UHFFFAOYSA-N	[H]Oc(c([H])2)c([H])c([H])c(c([H])2)C([H])([H])C([H])([H])C([H])(C([H])([H])[H])N([H])C([H])([H])C([H])([H])c(c([H])1)c([H])c(O[H])c(O[H])c([H])1	0.30257	1.68e-06	1.70627
202	Positive	7.087	973.013	Unknown	[M+H]+	null	null	null	null	0.11275	1.7e-06	1.93454
203	Positive	12.918	804.624	Unknown	[M+H]+	null	null	null	null	0.18523	1.73e-06	1.6892
204	Positive	10.115	286.338	Unknown	[M+H]+	null	null	null	null	0.10816	1.8e-06	2.01358
205	Positive	8.51	324.316	Unknown	[M+H]+	null	null	null	null	0.12252	1.8e-06	1.7643
206	Positive	11.849	512.459	Unknown	[M+H]+	null	null	null	null	0.21826	1.8e-06	1.87525
207	Positive	14.46	796.681	Unknown	[M+H]+	null	null	null	null	0.1368	1.8e-06	2.05561
208	Positive	11.051	324.247	low score: Melophlin B/C/G/K/L/N/O	[M+H]+	C19H33NO3	N-alkylpyrrolidines	WBPPODSRZVXVJK-MSUUIHNZSA-N	CCCCCCCCCCCC/C(O)=C(C1=O)\C(C(N1C)C)=O	0.14894	1.81e-06	2.19708
209	Positive	9.523	325.251	low score: GLYCEROL-MYRISTATE	[M+Na]+	C17H34O4	1-monoacylglycerols	DCBSHORRWZKAKO-UHFFFAOYSA-N	CCCCCCCCCCCCCC(=O)OCC(CO)O	0.16192	1.81e-06	2.18326
210	Positive	0.646	105.934	Unknown	[M+H]+	null	null	null	null	91.631	1.81e-06	1.90687
211	Positive	10.49	344.347	Unknown	[M+H]+	null	null	null	null	0.12684	1.81e-06	1.78599
212	Positive	6.954	228.217	Unknown	[M+H]+	null	null	null	null	0.15368	1.81e-06	2.01573
213	Positive	8.324	324.247	low score: Melophlin B/C/G/K/L/N/O	[M+H]+	C19H33NO3	N-alkylpyrrolidines	WBPPODSRZVXVJK-MSUUIHNZSA-N	CCCCCCCCCCCC/C(O)=C(C1=O)\C(C(N1C)C)=O	0.16689	1.81e-06	1.95949
214	Positive	0.267	758.636	Unknown	[M+H]+	null	null	null	null	0.13513	1.81e-06	2.10818
215	Positive	12.376	393.278	Unknown	[M+H]+	null	null	null	null	0.11166	1.83e-06	1.91139
216	Positive	0.725	287.248	low score: Unknown (carbon number 20); PlaSMA ID-1412	[M+H]+	C20H30O	Unknown	null	null	0.18635	1.88e-06	2.1893
217	Positive	0.635	104.016	Unknown	[M+H]+	null	null	null	null	40.51	1.88e-06	1.77223
218	Positive	12.208	380.372	Unknown	[M+H]+	null	null	null	null	0.15766	1.88e-06	1.89044
219	Positive	16.278	758.633	Unknown	[M+H]+	null	null	null	null	0.081169	1.88e-06	2.06271
220	Positive	0.389	203.242	Unknown	[M+H]+	null	null	null	null	0.097218	1.89e-06	1.82507
221	Positive	7.72	274.295	Unknown	[M+H]+	null	null	null	null	0.16027	1.9e-06	1.96203
222	Positive	8.976	302.33	Unknown	[M+H]+	null	null	null	null	0.12643	1.91e-06	2.00607
223	Positive	13.435	357.332	low score: conessine	[M+H]+	C24H40N2	Conanine-type alkaloids	GPLGAQQQNWMVMM-CYFNKAHPSA-N	C1=C2CC(N(C)C)CCC2(C)C3CCC45CN(C)C(C)C5CCC4C3C1	0.13573	1.91e-06	1.82056
224	Positive	6.618	592.427	low score: Unknown (carbon number 34); PlaSMA ID-2968	[M+H]+	C34H57NO7	Unknown	null	null	0.27391	1.93e-06	1.35527
225	Positive	8.024	268.178	low score: brevicarine	[M+H]+	C17H21N3	Harmala alkaloids	OMGIBPZQATWNBX-UHFFFAOYSA-N	N=1C=C(C=2C=3C=CC=CC3NC2C1C)CCCCNC	0.14839	1.94e-06	2.09055
226	Positive	9.038	241.197	low score: h_14_19_norandrosterone	[M-2H2O+H]+	C18H28O2	Estrogens and derivatives	UOUIARGWRPHDBX-CQZDKXCPSA-N	O[C@@H]1CC[C@@]2([H])[C@](CC[C@]3([H])[C@]2([H])CC[C@@]4(C)[C@@]3([H])CCC4=O)([H])C1	0.2202	1.94e-06	1.9363
227	Positive	9.528	324.246	low score: Melophlin B/C/G/K/L/N/O	[M+H]+	C19H33NO3	N-alkylpyrrolidines	WBPPODSRZVXVJK-MSUUIHNZSA-N	CCCCCCCCCCCC/C(O)=C(C1=O)\C(C(N1C)C)=O	0.16251	1.95e-06	2.08565
228	Positive	12.225	364.375	Unknown	[M+H]+	null	null	null	null	0.15655	1.95e-06	2.09007
229	Positive	12.376	245.249	low score: N1-Acetylspermine	[M+H]+	C12H28N4O	Acetamides	GUNURVWAJRRUAV-UHFFFAOYSA-N	NCCCNCCCCNCCCNC(C)=O	0.11592	1.95e-06	1.78256
230	Positive	7.646	239.184	Unknown	[M+H]+	null	null	null	null	0.30105	1.97e-06	1.49212
231	Positive	7.374	230.27	Unknown	[M+H]+	null	null	null	null	0.12684	1.97e-06	2.11673
232	Negative	19.871	199.801	Unknown	[M-H]-	null	null	null	null	0.3238	2.01e-06	1.71439
233	Negative	19.774	195.8	Unknown	[M-H]-	null	null	null	null	0.35735	2.02e-06	1.8042
234	Positive	19.874	419.354	low score: "(3R,5S,7R,9S,10S,12S,13R,14S,17R)-17-((2R)-7-hydroxy-6-methylheptan-2-yl)-10,13-dimethylhexadecahydro-1H-cyclopenta[a]phenanthrene-3,7,12-triol"	[M-H2O+H]+	C27H48O4	Tetrahydroxy bile acids, alcohols and derivatives	XJZGNVBLVFOSKJ-XZULNKEGSA-N	C[C@H](CCCC(C)CO)[C@H]1CC[C@H]2[C@]3([H])[C@H](O)C[C@@H]4C[C@H](O)CC[C@]4(C)[C@H]3C[C@H](O)[C@@]21C	0.15172	2.04e-06	2.2516
235	Positive	15.397	324.246	no MS2: Melophlin B/C/G/K/L/N/O	[M+H]+	C19H33NO3	N-alkylpyrrolidines	WBPPODSRZVXVJK-MSUUIHNZSA-N	CCCCCCCCCCCC/C(O)=C(C1=O)\C(C(N1C)C)=O	0.14548	2.04e-06	2.20965
236	Positive	8.809	602.445	Unknown	[M+H]+	null	null	null	null	0.14059	2.04e-06	1.71672
237	Positive	14.391	478.451	Unknown	[M+H]+	null	null	null	null	0.12944	2.04e-06	1.95984
238	Positive	6.626	312.194	low score: Dienogest	[M+H]+	C20H25NO2	Oxosteroids	AZFLJNIPTRTECV-FUMNGEBKSA-N	C[C@]12CCC3=C4CCC(=O)C=C4CC[C@H]3[C@@H]1CC[C@]2(CC#N)O	0.2572	2.04e-06	1.84104
239	Positive	0.173	758.635	Unknown	[M+H]+	null	null	null	null	0.132	2.04e-06	2.19738
240	Positive	7.064	875.111	Unknown	[M+H]+	null	null	null	null	0.1225	2.04e-06	1.96572
241	Positive	13.763	534.503	Unknown	[M+H]+	null	null	null	null	0.10249	2.05e-06	1.76282
242	Positive	7.277	274.299	Unknown	[M+H]+	null	null	null	null	0.13039	2.07e-06	2.22411
243	Positive	18.922	544.497	Unknown	[M+H]+	null	null	null	null	0.11625	2.07e-06	1.91252
244	Positive	12.376	263.261	Unknown	[M+H]+	null	null	null	null	0.11102	2.08e-06	1.79065
245	Positive	14.08	386.432	Unknown	[M+H]+	null	null	null	null	0.11121	2.08e-06	1.63571
246	Positive	0.143	806.642	Unknown	[M+H]+	null	null	null	null	0.14179	2.08e-06	2.2408
247	Positive	12.375	377.301	low score: "(4R)-4-((3R,5S,9S,10S,13R,14S,17R)-3-hydroxy-10,13-dimethylhexadecahydro-1H-cyclopenta[a]phenanthren-17-yl)pentanoic acid"	[M+H]+	C24H40O3	Monohydroxy bile acids, alcohols and derivatives	SMEROWZSTRWXGI-NWFSOSCSSA-N	C[C@@]12[C@](CC[C@]3([H])[C@@H]2CC[C@@]4(C)[C@H]3CC[C@@H]4[C@@H](CCC(O)=O)C)([H])C[C@H](O)CC1	0.098457	2.1e-06	1.92963
248	Positive	9.951	330.368	Unknown	[M+H]+	null	null	null	null	0.11564	2.11e-06	2.13767
249	Positive	8.144	639.46	low score: Mogroside I E1	[M+H]+	C36H62O9	Cucurbitacin glycosides	LLZGAVAIPZROOJ-UHFFFAOYSA-N	OCC1OC(OC2CCC3C(=CCC4C3(C)C(O)CC5(C)C(CCC45C)C(C)CCC(O)C(O)(C)C)C2(C)C)C(O)C(O)C1O	0.12386	2.11e-06	1.70429
250	Positive	12.376	372.344	low score: NCGC00380102-01!3-hexadecyl-4-methoxy-5-methyloxolan-2-one	[M+NH4]+	C22H42O3	Gamma butyrolactones	DJNFXUFERDZHCD-UHFFFAOYSA-N	CCCCCCCCCCCCCCCCC1C(OC)C(C)OC1=O	0.11171	2.13e-06	1.89816
251	Positive	10.057	570.403	low score: "(4R)-4-((3R,5S,7R,9S,10S,13R,14S,17R)-3,7-dihydroxy-10,13-dimethylhexadecahydro-1H-cyclopenta[a]phenanthren-17-yl)-N-methyl-N-((2S,3R,4R,5R)-2,3,4,5,6-pentahydroxyhexyl)pentanamide"	[M+H]+	C31H55NO8	Dihydroxy bile acids, alcohols and derivatives	KUXSAFRZQPYINU-SGWAQUIASA-N	C[C@H](CCC(N(C)C[C@H](O)[C@@H](O)[C@@H]([C@@H](CO)O)O)=O)[C@H]1CC[C@H]2[C@]3([H])[C@H](O)C[C@@H]4C[C@H](O)CC[C@]4(C)[C@H]3CC[C@@]21C	0.16151	2.13e-06	1.76114
252	Positive	13.354	376.377	Unknown	[M+H]+	null	null	null	null	0.13685	2.14e-06	2.05134
253	Positive	0.532	325.249	low score: allo-Protolichesterinic acid	[M+H]+	C19H32O4	Gamma butyrolactones	WZYZDHVPSZCEEP-IRXDYDNUSA-N	CCCCCCCCCCCCC[C@@H]1OC(=O)C(=C)[C@@H]1C(=O)O	0.18023	2.14e-06	2.00295
254	Positive	12.455	352.347	Unknown	[M+H]+	null	null	null	null	0.14728	2.15e-06	1.93593
255	Positive	0.628	325.249	Unknown	[M+H]+	null	null	null	null	0.18103	2.15e-06	1.99175
256	Positive	16.346	784.655	Unknown	[M+H]+	null	null	null	null	0.12788	2.15e-06	1.98199
257	Positive	6.409	996.691	Unknown	[M+H]+	null	null	null	null	0.11618	2.17e-06	1.95662
258	Positive	17.092	758.634	Unknown	[M+H]+	null	null	null	null	0.10778	2.18e-06	2.04728
259	Positive	0.718	141.968	Unknown	[M+H]+	null	null	null	null	13.374	2.23e-06	2.01225
260	Positive	8.772	802.058	low score: (NAG)(NAM)-AqOA[3-NH2-SATA];(G-G)-(NAG)(NAM)-AqOA[3-NH2-SATA]	[M+3H]3+	C96H162N24O47	Polypeptides	QMVZTJWZCDWESW-UHFFFAOYSA-N	CC(=O)NC1C(OC2C(CO)OC(OC3C(CO)OC(OC4C(CO)OC(O)C(NC(C)=O)C4OC(C)C(=O)NC(C)C(=O)NC(CCC(=O)NC(CCCNC(=O)C(CO)NC(=O)C(C)NC(=O)C(NC(=O)C(C)N)C(C)O)C(=O)NC(C)C(=O)O)C(N)=O)C(NC(C)=O)C3O)C(NC(C)=O)C2OC(C)C(=O)NC(C)C(=O)NC(CCC(=O)NC(CCCNC(=O)C(CO)NC(=O)C(C)NC(=O)C(NC(=O)C(C)N)C(C)O)C(=O)NC(C)C(=O)O)C(N)=O)OC(CO)C(O)C1O	0.12816	2.23e-06	1.91957
261	Positive	13.226	324.247	no MS2: Melophlin B/C/G/K/L/N/O	[M+H]+	C19H33NO3	N-alkylpyrrolidines	WBPPODSRZVXVJK-MSUUIHNZSA-N	CCCCCCCCCCCC/C(O)=C(C1=O)\C(C(N1C)C)=O	0.153	2.26e-06	2.1768
262	Positive	0.759	304.275	Unknown	[M+H]+	null	null	null	null	0.17546	2.26e-06	2.12587
263	Positive	13.791	374.361	low score: Conessine	[M+NH4]+	C24H40N2	Conanine-type alkaloids	GPLGAQQQNWMVMM-MYAJQUOBSA-N	C1=C2CC(N(C)C)CCC2(C)C3CCC45CN(C)C(C)C5CCC4C3C1	0.1164	2.26e-06	1.95282
264	Positive	8.51	302.333	Unknown	[M+H]+	null	null	null	null	0.12271	2.26e-06	2.06292
265	Positive	8.181	512.376	Unknown	[M+H]+	null	null	null	null	0.17801	2.27e-06	1.90239
266	Positive	0.743	115.966	Unknown	[M+H]+	null	null	null	null	9.4478	2.29e-06	1.95895
267	Positive	14.909	830.643	Unknown	[M+H]+	null	null	null	null	0.13359	2.29e-06	1.9489
268	Positive	8.969	508.386	Unknown	[M+H]+	null	null	null	null	0.15275	2.32e-06	1.99117
269	Positive	8.772	558.344	low score: Dimethyl ketal of oxysporidinone_130004	[M+Na]+	C30H49NO7	Terpene glycosides	OKLOELQSMKXXGE-RCCKNPSSSA-N	OC1CC(OC)(OC)CCC1(O)C2=CN(C)C(C(C3OC(/C(C)=C/C(C)CC(C)CC)C(C)CC3)=C2O)=O	0.16643	2.33e-06	2.13679
270	Positive	0.376	378.82	Unknown	[M+H]+	null	null	null	null	18.833	2.33e-06	1.67707
271	Positive	11.001	388.247	low score: (1r,5R,7S)-5,7-diethyl-2-(1-ethyl-2-methyl-1H-indol-3-yl)-1,3-diazaadamantan-6-one	[M+Na]+	C23H31N3O	N-alkylindoles	KRYFHYSXWHRZKT-BRTIRZTQSA-N	O=C1C2(CN3CC1(CN(C2)C3C=4C=5C=CC=CC5N(C4C)CC)CC)CC	0.14778	2.33e-06	2.03186
272	Positive	9.28	496.429	Unknown	[M+H]+	null	null	null	null	0.24097	2.33e-06	1.29967
273	Positive	10.731	324.246	no MS2: Melophlin B/C/G/K/L/N/O	[M+H]+	C19H33NO3	N-alkylpyrrolidines	WBPPODSRZVXVJK-MSUUIHNZSA-N	CCCCCCCCCCCC/C(O)=C(C1=O)\C(C(N1C)C)=O	0.16067	2.35e-06	2.1394
274	Positive	0.261	832.658	Unknown	[M+H]+	null	null	null	null	0.1306	2.38e-06	1.90888
275	Positive	10.643	356.386	Unknown	[M+H]+	null	null	null	null	0.10897	2.41e-06	2.00448
276	Positive	8.12	851.474	Unknown	[M+H]+	null	null	null	null	0.051047	2.42e-06	1.74532
277	Positive	6.475	325.249	Unknown	[M+H]+	null	null	null	null	0.20905	2.43e-06	1.89649
278	Positive	12.377	400.376	Unknown	[M+H]+	null	null	null	null	0.11017	2.45e-06	1.86882
279	Positive	0.711	213.903	Unknown	[M+H]+	null	null	null	null	38.397	2.5e-06	1.82032
280	Positive	13.791	357.332	low score: conessine	[M+H]+	C24H40N2	Conanine-type alkaloids	GPLGAQQQNWMVMM-CYFNKAHPSA-N	C1=C2CC(N(C)C)CCC2(C)C3CCC45CN(C)C(C)C5CCC4C3C1	0.11893	2.5e-06	2.00529
281	Positive	15.512	784.648	Unknown	[M+H]+	null	null	null	null	0.15377	2.5e-06	1.9798
282	Positive	7.809	603.35	low score: Canthaxanthin (Euglenanone)	[M+K]+	C40H52O2	Xanthophylls	FDSDTBUPSURDBL-DKLMTRRASA-N	O=C1C(=C(C=CC(=CC=CC(=CC=CC=C(C=CC=C(C=CC2=C(C(=O)CCC2(C)C)C)C)C)C)C)C(C)(C)CC1)C	0.14515	2.51e-06	1.84441
283	Positive	17.811	416.41	Unknown	[M+H]+	null	null	null	null	0.14643	2.54e-06	2.10175
284	Positive	8.943	325.25	Unknown	[M+H]+	null	null	null	null	0.1758	2.61e-06	2.04982
285	Positive	9.313	296.248	Unknown	[M+H]+	null	null	null	null	0.19414	2.61e-06	1.73129
286	Positive	7.567	219.193	low score: Tributylphosphine oxide	[M+H]+	C12H27OP	Organophosphine oxides	MNZAKDODWSQONA-UHFFFAOYSA-N	CCCCP(=O)(CCCC)CCCC	0.24462	2.63e-06	2.16953
287	Positive	1.073	136.061	no MS2: METHYLMALONATE	[M+NH4]+	C4H6O4	Dicarboxylic acids and derivatives	ZIYVHBGGAOATLY-UHFFFAOYSA-N	CC(C(=O)O)C(=O)O	0.4777	2.74e-06	1.49318
288	Positive	7.928	258.305	Unknown	[M+H]+	null	null	null	null	0.070538	2.75e-06	1.61691
289	Positive	0.702	361.848	Unknown	[M+H]+	null	null	null	null	20.195	2.75e-06	1.6223
290	Positive	7.567	264.255	Unknown	[M+H]+	null	null	null	null	0.17524	2.78e-06	2.19713
291	Positive	9.663	554.445	Unknown	[M+H]+	null	null	null	null	0.14353	2.79e-06	1.7771
292	Positive	13.513	407.304	low score: 5-[1,2,4a-trimethyl-5-(3-methylbutanoyloxymethyl)-2,3,4,7,8,8a-hexahydronaphthalen-1-yl]-3-methylpentanoic acid	[M+H]+	C25H42O4	Colensane and clerodane diterpenoids	FISIJWVRKFHLSM-UHFFFAOYSA-N	O=C(O)CC(C)CCC1(C)C(C)CCC2(C(=CCCC21)COC(=O)CC(C)C)C	0.14799	2.81e-06	2.06372
293	Positive	14.46	122.105	no MS2: 2,6-Xylidine	[M+H]+	C8H11N	m-Xylenes	UFFBMTHBGFGIHF-UHFFFAOYSA-N	CC1=CC=CC(C)=C1N	13.245	2.81e-06	1.99722
294	Positive	10.804	344.38	low score: DOCOSANOL	[M+NH4]+	C22H46O	Fatty alcohols	NOPFSRXAKWQILS-UHFFFAOYSA-N	OCCCCCCCCCCCCCCCCCCCCCC	0.12726	2.81e-06	1.84826
295	Positive	9.303	586.358	Unknown	[M+H]+	null	null	null	null	0.15753	2.81e-06	1.93997
296	Positive	10.862	546.4	Unknown	[M+H]+	null	null	null	null	0.16861	2.81e-06	1.99319
297	Positive	9.223	568.38	Unknown	[M+H]+	null	null	null	null	0.19561	2.81e-06	1.70797
298	Positive	13.588	464.413	Unknown	[M+H]+	null	null	null	null	0.15332	2.85e-06	2.22219
299	Positive	11.647	284.353	Unknown	[M+H]+	null	null	null	null	0.16588	2.85e-06	1.94824
300	Positive	13.698	682.421	low score: 11-hydroxy-9-(hydroxymethyl)-2-methoxycarbonyl-2,6a,6b,9,12a-pentamethyl-10-(3,4,5-trihydroxyoxan-2-yl)oxy-1,3,4,5,6,6a,7,8,8a,10,11,12,13,14b-tetradecahydropicene-4a-carboxylic acid	[M+NH4]+	C36H56O11	Triterpenoids	SFZVDNKTWPZIJG-UHFFFAOYSA-N	O=C(O)C12CCC(C(=O)OC)(C)CC2C3=CCC4C5(C)CC(O)C(OC6OCC(O)C(O)C6O)C(C)(CO)C5CCC4(C)C3(C)CC1	0.11694	2.85e-06	1.91338
301	Positive	0.118	430.428	Unknown	[M+H]+	null	null	null	null	0.16379	2.85e-06	2.02096
302	Positive	12.127	468.432	Unknown	[M+H]+	null	null	null	null	0.18354	2.88e-06	2.13002
303	Positive	0.425	344.82	Unknown	[M+H]+	null	null	null	null	16.929	2.91e-06	1.6436
304	Positive	12.376	355.316	Unknown	[M+H]+	null	null	null	null	0.12769	2.91e-06	1.85355
305	Positive	0.483	140.962	Unknown	[M+H]+	null	null	null	null	29.133	2.93e-06	1.94926
306	Positive	7.915	272.283	Unknown	[M+H]+	null	null	null	null	0.11465	2.93e-06	1.87832
307	Positive	17.145	585.325	low score: lappaconitine	[M+H]+	C32H44N2O8	Lappaconitine-type diterpenoid alkaloids	NWBWCXBPKTTZNQ-GSAAXPBRSA-N	O=C(OC12CN(CC)C3C4CC1C3(C(OC)CC2)C5CC6C(OC)CC4(O)C5(O)C6OC)C=7C=CC=CC7NC(=O)C	0.093362	2.94e-06	1.79488
308	Positive	8.697	566.613	Unknown	[M+H]+	null	null	null	null	0.1526	2.96e-06	1.6133
309	Positive	8.141	458.896	Unknown	[M+H]+	null	null	null	null	0.12434	2.96e-06	1.80866
310	Positive	14.276	452.435	Unknown	[M+H]+	null	null	null	null	0.19708	2.96e-06	1.57253
311	Positive	14.39	450.418	Unknown	[M+H]+	null	null	null	null	0.13616	2.96e-06	2.00594
312	Positive	12.249	399.335	Unknown	[M+H]+	null	null	null	null	4.733	2.97e-06	1.70744
313	Positive	14.963	429.442	Unknown	[M+H]+	null	null	null	null	0.15459	2.99e-06	2.22336
314	Positive	9.231	520.387	Unknown	[M+H]+	null	null	null	null	0.18381	2.99e-06	1.74036
315	Positive	0.559	148.147	Unknown	[M+H]+	null	null	null	null	0.32601	2.99e-06	2.02885
316	Positive	0.405	170.168	Unknown	[M+H]+	null	null	null	null	0.21085	3.01e-06	2.01889
317	Positive	9.663	520.786	Unknown	[M+H]+	null	null	null	null	0.1655	3.03e-06	1.70591
318	Positive	8.269	256.286	Unknown	[M+H]+	null	null	null	null	0.17838	3.04e-06	1.72125
319	Positive	9.051	242.166	low score: NCGC00385536-01!(2E,4E)-N-(1,3-dihydroxy-3-methylpentan-2-yl)-2-methylhexa-2,4-dienamide [IIN-based on: CCMSLIB00000845102]	[M+H]+	C13H23NO3	Tertiary alcohols	PHCDULUANYZTRK-RMTFUQJTSA-N	CCC(C)(O)C(CO)NC(=O)C(\\C)=C\\C=C\\C	0.31393	3.05e-06	1.77842
320	Positive	10.865	614.395	low score: Edpetiline	[M+Na]+	C33H53NO8	Steroidal saponins	DHQFYEJMFMYGCV-UHFFFAOYSA-N	O=C1CC2C3CCC4C(CN5CC(C)CCC5C4(O)C)C3CC2C6(C)CCC(OC7OC(CO)C(O)C(O)C7O)CC16	0.13802	3.11e-06	1.93814
321	Positive	7.808	621.351	low score: NCGC00381318-01![3-methyl-1-[3-methyl-1-[3-methyl-1-oxo-1-(2,3,4,5,6-pentahydroxyhexoxy)pentan-2-yl]oxy-1-oxopentan-2-yl]oxy-1-oxopentan-2-yl] 2-hydroxy-3-methylpentanoate [IIN-based on: CCMSLIB00000845116]	[M-H2O+H]+	C30H54O14	Depsipeptides	XHFZCGJKWBSHAG-UHFFFAOYSA-N	CCC(C)C(O)C(=O)OC(C(C)CC)C(=O)OC(C(C)CC)C(=O)OC(C(C)CC)C(=O)OCC(O)C(O)C(O)C(O)CO	0.15433	3.13e-06	1.91823
322	Positive	1.4	224.148	low score: Camellimidazole D	[M+H]+	C10H17N5O	2-heteroaryl carboxamides	VTPXABIHFAGVJO-UHFFFAOYSA-N	CN1C2=C(N(CN(CN(C)C2=O)C)C)N=C1	0.23458	3.2e-06	1.89828
323	Positive	8.696	524.317	low score: Aspartate conjugated cholic acid	[M+H]+	C28H45NO8	Glycinated bile acids and derivatives	VMFFESMCXOCOIZ-NCLBRSMESA-N	C[C@H](CCC(N[C@@H](CC(O)=O)C(O)=O)=O)[C@H]1CC[C@@]2([H])[C@]3([H])[C@H](O)C[C@]4([H])C[C@H](O)CC[C@]4(C)[C@H]3C[C@H](O)[C@@]21C	0.22271	3.23e-06	1.75096
324	Positive	9.663	612.381	low score: NCGC00384824-01!methyl 3-hydroxy-2-[[3-hydroxy-2-[[2-[(3-hydroxy-2,4-dimethyltetradecanoyl)amino]-3-methylbutanoyl]amino]butanoyl]amino]propanoate [IIN-based on: CCMSLIB00000848076]	[M+K]+	C29H55N3O8	Peptides	AKMKWHBDPUOPSK-UHFFFAOYSA-N	CCCCCCCCCCC(C)C(O)C(C)C(=O)NC(C(C)C)C(=O)NC(C(C)O)C(=O)NC(CO)C(=O)OC	0.13794	3.24e-06	1.7951
325	Positive	10.613	399.288	low score: Geranylgeranyl 1,4-hydroquinone	[M+H]+	C26H38O3	Diterpenoids	MYSSQNMFYDHCAT-FLPKSHQQSA-N	OC1=C(C/C=C(CC/C=C(C)/CC/C=C(C)/CC/C=C(C)\C)\C)C=C(O)C=C1O	0.26997	3.31e-06	1.88555
326	Positive	8.106	542.372	low score: NCGC00381175-01!3-hydroxy-2-[[3-[3-(3-hydroxy-6-methylheptanoyl)oxy-6-methylheptanoyl]oxy-8-methylnonanoyl]amino]propanoic acid [IIN-based on: CCMSLIB00000848442]	[M-H2O+H]+	C29H53NO9	N-acyl-alpha amino acids	MWZPHNZNPKKSEI-UHFFFAOYSA-N	CC(C)CCCCC(CC(=O)NC(CO)C(O)=O)OC(=O)CC(CCC(C)C)OC(=O)CC(O)CCC(C)C	0.14014	3.33e-06	1.51997
327	Positive	8.782	302.329	Unknown	[M+H]+	null	null	null	null	0.14606	3.33e-06	1.75239
328	Positive	17.749	436.381	Unknown	[M+H]+	null	null	null	null	0.15622	3.44e-06	2.24362
329	Positive	7.866	316.217	low score: "Saxagliptin (BMS-477118,Onglyza)"	[M+H]+	C18H25N3O2	Alpha amino acid amides	QGJUIPDUBHWZPV-BBIKMUCQSA-N	C1C2CC3(CC1CC(C2)(O)C3)[C@@H](C(N4[C@@H](C[C@]5([C@]4(C5)[H])[H])C#N)=O)N	0.15722	3.44e-06	2.02935
330	Positive	6.679	356.223	low score: NCGC00384969-01_C22H31NO4_(5R)-3-({(1S,2R,4aS,6R,8aR)-1,6-Dimethyl-2-[(1E)-1-propen-1-yl]-1,2,4a,5,6,7,8,8a-octahydro-1-naphthalenyl}carbonyl)-4-hydroxy-5-(hydroxymethyl)-1-methyl-1,5-dihydro-2H-pyrrol-2-one	[M-H2O+H]+	C22H31NO4	Pyrrolines	YHKYFYCSTJGMID-JWROMMBDSA-N	C\C=C\[C@@H]1\C=C/[C@@H]2C[C@H](C)CC[C@H]2[C@]1(C)C(=O)/C3=C(O)/[C@@H](CO)N(C)C3=O	0.36738	3.46e-06	1.90557
331	Positive	11.959	600.52	Unknown	[M+H]+	null	null	null	null	0.17627	3.49e-06	1.83578
332	Positive	13.79	379.315	low score: conessine	[M+Na]+	C24H40N2	Conanine-type alkaloids	GPLGAQQQNWMVMM-CYFNKAHPSA-N	C1=C2CC(N(C)C)CCC2(C)C3CCC45CN(C)C(C)C5CCC4C3C1	0.12004	3.64e-06	2.00887
333	Positive	0.425	229.908	Unknown	[M+H]+	null	null	null	null	38.575	3.64e-06	1.61264
334	Positive	0.083	464.413	Unknown	[M+H]+	null	null	null	null	0.15783	3.65e-06	2.25403
335	Positive	12.221	396.345	low score: N-Oleyl-Leucine	[M+H]+	C24H45NO3	Leucine and derivatives	UMOAAMQGRRCHPA-GJCOWUBNSA-N	CCCCCCCC/C=C\CCCCCCCC(=O)N[C@@H](CC(C)C)C(=O)O	0.1281	3.68e-06	1.58349
336	Positive	8.625	526.337	low score: NCGC00380724-01_C28H47NO8_(3R,5R,6S,7S,9R,11E,13S,14R)-14-Ethyl-13-hydroxy-3,5,7,9,13-pentamethyl-2,4,10-trioxooxacyclotetradec-11-en-6-yl 3,4,6-trideoxy-3-(dimethylamino)-D-xylo-hexopyranoside	[M+H]+	C28H47NO8	Aminoglycosides	UZQBOFAUUTZOQE-SOSMEOBRSA-N	CC[C@H]1OC(=O)[C@H](C)C(=O)[C@H](C)[C@@H](OC2O[C@H](C)C[C@@H]([C@H]2O)N(C)C)[C@@H](C)C[C@@H](C)C(=O)\C=C\[C@]1(C)O	0.16844	3.68e-06	1.81857
337	Positive	9.113	324.244	low score: Melophlin B/C/G/K/L/N/O	[M+H]+	C19H33NO3	N-alkylpyrrolidines	WBPPODSRZVXVJK-MSUUIHNZSA-N	CCCCCCCCCCCC/C(O)=C(C1=O)\C(C(N1C)C)=O	0.17811	3.68e-06	2.03023
338	Positive	17.723	429.277	Unknown	[M+H]+	null	null	null	null	0.17648	3.69e-06	1.83063
339	Positive	0.435	125.98	Unknown	[M+H]+	null	null	null	null	40.901	3.71e-06	1.61991
340	Positive	16.935	402.393	Unknown	[M+H]+	null	null	null	null	0.17061	3.71e-06	1.99793
341	Positive	14.955	384.382	Unknown	[M+H]+	null	null	null	null	0.15981	3.73e-06	2.11447
342	Positive	12.433	374.338	low score: N-Benzylstearamide	[M+H]+	C25H43NO	N-acyl amines	IXODJGLAVBPVSW-UHFFFAOYSA-N	O=C(NCC=1C=CC=CC1)CCCCCCCCCCCCCCCCC	0.16136	3.75e-06	1.90076
343	Positive	13.475	516.468	Unknown	[M+H]+	null	null	null	null	0.14906	3.77e-06	1.805
344	Positive	8.31	318.307	low score: Phytosphingosine (not validated, isomer of 1696)	[M+H]+	C18H39NO3	1,3-aminoalcohols	AERBNCYCJBRYDG-UHFFFAOYSA-N	OCC(N)C(O)C(O)CCCCCCCCCCCCCC	0.15414	3.77e-06	1.742
345	Positive	8.791	610.367	low score: NCGC00386067-01!2-[2-(19-acetamido-16,18-dihydroxy-5,9-dimethyl-6-oxoicosan-7-yl)oxy-2-oxoethyl]butanedioic acid [IIN-based on: CCMSLIB00000846988]	[M+Na]+	C30H53NO10	Tricarboxylic acids and derivatives	CYKDMNNWBMLNSF-UHFFFAOYSA-N	CCCCC(C)C(=O)C(CC(C)CCCCCCC(O)CC(O)C(C)NC(C)=O)OC(=O)CC(CC(O)=O)C(O)=O	0.15531	3.77e-06	1.59613
346	Positive	6.102	555.606	Unknown	[M+H]+	null	null	null	null	12.869	3.78e-06	1.66418
347	Positive	14.546	759.636	Unknown	[M+H]+	null	null	null	null	0.32378	3.78e-06	1.67731
348	Negative	11.409	301.205	Unknown	[M-H]-	null	null	null	null	2.6595	3.78e-06	1.48294
349	Positive	7.164	257.185	low score: Bakuchiol	[M+H]+	C18H24O	Aromatic monoterpenoids	LFYJSSARVMHQJB-QIXNEVBVSA-N	OC1=CC=C(C=C1)C=CC(C=C)(C)CCC=C(C)C	3.0823	3.8e-06	1.65576
350	Positive	8.137	458.881	Unknown	[M+H]+	null	null	null	null	0.12752	3.8e-06	1.78779
351	Positive	13.019	398.268	low score: Phytosphingosine-1-P	[M+H]+	C18H40NO6P	Phosphosphingolipids	AYGOSKULTISFCW-KZNAEPCWSA-N	CCCCCCCCCCCCCC[C@H]([C@@H]([C@@H](COP(=O)(O)O)N)O)O	0.16312	3.88e-06	2.16351
352	Positive	8.77	542.372	low score: NCGC00381175-01!3-hydroxy-2-[[3-[3-(3-hydroxy-6-methylheptanoyl)oxy-6-methylheptanoyl]oxy-8-methylnonanoyl]amino]propanoic acid [IIN-based on: CCMSLIB00000848442]	[M-H2O+H]+	C29H53NO9	N-acyl-alpha amino acids	MWZPHNZNPKKSEI-UHFFFAOYSA-N	CC(C)CCCCC(CC(=O)NC(CO)C(O)=O)OC(=O)CC(CCC(C)C)OC(=O)CC(O)CCC(C)C	0.17605	3.91e-06	2.03021
353	Positive	15.526	419.354	low score: "(3R,5S,7R,9S,10S,12S,13R,14S,17R)-17-((2R)-7-hydroxy-6-methylheptan-2-yl)-10,13-dimethylhexadecahydro-1H-cyclopenta[a]phenanthrene-3,7,12-triol"	[M-H2O+H]+	C27H48O4	Tetrahydroxy bile acids, alcohols and derivatives	XJZGNVBLVFOSKJ-XZULNKEGSA-N	C[C@H](CCCC(C)CO)[C@H]1CC[C@H]2[C@]([C@@H]3C[C@H](O)[C@@]21C)([H])[C@H](O)C[C@H]4[C@]3(C)CC[C@@H](O)C4	0.20414	3.96e-06	2.18965
354	Positive	12.813	369.386	Unknown	[M+H]+	null	null	null	null	0.14409	4e-06	1.45682
355	Positive	13.697	654.392	Unknown	[M+H]+	null	null	null	null	0.12198	4e-06	1.81062
356	Positive	7.866	332.191	mahanimbine	[M+H]+	C23H25NO	Carbazoles	HTNVFUBCWIYPJN-QHCPKHFHSA-N	O1C=2C(C=CC1(C)CCC=C(C)C)=C3NC=4C=CC=CC4C3=CC2C	0.15878	4e-06	1.63207
357	Positive	9.052	592.386	low score: Edpetiline	[M+H]+	C33H53NO8	Steroidal saponins	DHQFYEJMFMYGCV-UHFFFAOYSA-N	O=C1CC2C3CCC4C(CN5CC(C)CCC5C4(O)C)C3CC2C6(C)CCC(OC7OC(CO)C(O)C(O)C7O)CC16	0.18238	4e-06	1.55079
358	Negative	19.476	199.795	Unknown	[M-H]-	null	null	null	null	0.48633	4e-06	1.59376
359	Positive	6.35	130.171	low score: Octylamine	[M+H]+	C8H19N	Monoalkylamines	IOQPZZOEVPZRBK-UHFFFAOYSA-N	CCCCCCCCN	0.17779	4.03e-06	1.99044
360	Positive	8.619	258.303	Unknown	[M+H]+	null	null	null	null	0.13537	4.03e-06	1.98043
361	Positive	8.764	520.388	Unknown	[M+H]+	null	null	null	null	0.16623	4.04e-06	1.92002
362	Positive	10.173	352.342	Unknown	[M+H]+	null	null	null	null	0.18934	4.06e-06	1.8311
363	Positive	11.993	298.372	Unknown	[M+H]+	null	null	null	null	0.16134	4.09e-06	2.04428
364	Positive	12.298	443.314	low score: Unknown (carbon number 20); PlaSMA ID-2430	[M+H]+	C20H38N6O5	Unknown	null	null	0.15141	4.09e-06	1.87997
365	Positive	0.701	190.946	Unknown	[M+H]+	null	null	null	null	74.229	4.12e-06	1.87805
366	Positive	13.018	443.33	low score: Paxisterol_120160	[M+H]+	C28H42O4	Ergostane steroids	WUKYEOQJBJKFPH-VHCNFDLSSA-N	O[C@H]1CC[C@@]2(C)[C@](C[C@H]3[C@]4(O3)[C@]2([H])CCC56[C@@]4([H])[C@H]7CC5[C@@](CCC(C(C)C)=C)(C)O[C@]6([H])O7)([H])C1	0.18652	4.12e-06	2.01579
367	Positive	17.424	620.555	Unknown	[M+H]+	null	null	null	null	0.14039	4.13e-06	1.95656
368	Positive	16.699	516.471	Unknown	[M+H]+	null	null	null	null	0.14051	4.13e-06	1.9284
369	Positive	13.676	538.469	Unknown	[M+H]+	null	null	null	null	0.18768	4.13e-06	1.73868
370	Positive	17.81	371.346	Unknown	[M+H]+	null	null	null	null	0.36962	4.13e-06	1.77959
371	Positive	0.75	111.976	Unknown	[M+H]+	null	null	null	null	17.359	4.14e-06	1.77026
372	Positive	19.411	823.582	Unknown	[M+H]+	null	null	null	null	0.15884	4.14e-06	1.84743
373	Positive	6.36	170.17	Unknown	[M+H]+	null	null	null	null	0.17642	4.16e-06	2.15802
374	Positive	11.047	325.248	low score: GLYCEROL-MYRISTATE	[M+Na]+	C17H34O4	1-monoacylglycerols	DCBSHORRWZKAKO-UHFFFAOYSA-N	CCCCCCCCCCCCCC(=O)OCC(CO)O	0.18003	4.22e-06	2.14201
375	Positive	14.213	496.466	Unknown	[M+H]+	null	null	null	null	0.19539	4.22e-06	1.61032
376	Positive	8.435	660.283	low score: N-(2-(1H-benzo[d]imidazol-1-yl)ethyl)-2-((7-acetamido-1,2,3-trimethoxy-9-oxo-5,6,7,9-tetrahydrobenzo[a]heptalen-10-yl)amino)-4-(methylthio)butanamide	[M+H]+	C35H41N5O6S	Methionine and derivatives	VPKHXKUPCJSCHF-UHFFFAOYSA-N	O=C1C=C2C(=CC=C1NC(C(=O)NCCN3C=NC=4C=CC=CC43)CCSC)C5=C(OC)C(OC)=C(OC)C=C5CCC2NC(=O)C	25.052	4.28e-06	1.70031
377	Positive	10.33	286.331	Unknown	[M+H]+	null	null	null	null	0.13307	4.32e-06	1.87669
378	Positive	0.843	107.958	Unknown	[M+H]+	null	null	null	null	22.309	4.33e-06	1.8356
379	Positive	0.64	262.873	Unknown	[M+H]+	null	null	null	null	77.926	4.34e-06	2.07526
380	Positive	1.162	145.064	no MS2: 1-Naphthol	[M+2Na]2+	C10H8O	Naphthols and derivatives	KJCVRFUGPWSIIH-UHFFFAOYSA-N	C1=CC=C2C(=C1)C=CC=C2O	0.33636	4.34e-06	1.58209
381	Positive	11.881	399.428	Unknown	[M+H]+	null	null	null	null	0.16543	4.34e-06	1.97172
382	Positive	12.028	332.305	low score: NCGC00385919-01_C20H34O_2-Penten-1-ol, 5-[(1S,4aS,8aS)-decahydro-5,5,8a-trimethyl-2-methylene-1-naphthalenyl]-3-methyl-, (2E)-	[M+ACN+H]+	C20H34O	Diterpenoids	NERNKRPBSOBEHC-PTNGSMBKSA-N	CC(/CCC1C(=C)CCC2C(C)(C)CCCC12C)=C/CO	0.16873	4.35e-06	2.15357
383	Positive	17.791	637.526	Unknown	[M+H]+	null	null	null	null	0.15165	4.35e-06	1.726
384	Positive	13.493	395.247	low score: "(R)-4-((8S,9S,10R,13R,14S,17R)-10,13-dimethyl-3-oxo-2,3,6,7,8,9,10,11,12,13,14,15,16,17-tetradecahydro-1H-cyclopenta[a]phenanthren-17-yl)pentanoic acid"	[M+Na]+	C24H36O3	Bile acids, alcohols and derivatives	WCFIGQHNBJXROP-IHMUCKAYSA-N	C[C@@H]([C@H]1CC[C@]2([H])[C@]1(C)CC[C@@]3([H])[C@@]2([H])CCC([C@]3(C)CC4)=CC4=O)CCC(O)=O	16.302	4.35e-06	1.53494
385	Positive	7.865	339.293	low score: N-butyl-N-(1-(cyclohexylamino)-1-oxobutan-2-yl)-4-methylpentanamide	[M+H]+	C20H38N2O2	N-acyl amines	SKTZFCRNZMJIPZ-UHFFFAOYSA-N	CCCCN(C(=O)CCC(C)C)C(CC)C(=O)NC1CCCCC1	0.16179	4.38e-06	2.0097
386	Positive	6.255	324.246	no MS2: Melophlin B/C/G/K/L/N/O	[M+H]+	C19H33NO3	N-alkylpyrrolidines	WBPPODSRZVXVJK-MSUUIHNZSA-N	CCCCCCCCCCCC/C(O)=C(C1=O)\C(C(N1C)C)=O	0.22874	4.39e-06	1.73401
387	Positive	1.072	376.97	Unknown	[M+H]+	null	null	null	null	0.28308	4.39e-06	1.62149
388	Positive	15.538	404.411	Unknown	[M+H]+	null	null	null	null	0.16244	4.44e-06	2.17411
389	Positive	13.247	464.412	Unknown	[M+H]+	null	null	null	null	0.16634	4.44e-06	2.1658
390	Positive	12.814	256.285	Unknown	[M+H]+	null	null	null	null	0.25959	4.45e-06	1.56104
391	Positive	19.215	806.629	Unknown	[M+H]+	null	null	null	null	0.14395	4.55e-06	1.99757
392	Positive	19.88	464.414	Unknown	[M+H]+	null	null	null	null	0.16434	4.56e-06	2.27179
393	Positive	17.75	413.301	low score: 2-methyl-2-(3-pentadecylphenoxy)propanoic acid	[M+Na]+	C25H42O3	Phenoxyacetic acid derivatives	SQSAOEAQCNWNBE-UHFFFAOYSA-N	O=C(O)C(C)(C)OC1=CC(CCCCCCCCCCCCCCC)=CC=C1	0.2059	4.72e-06	1.91601
394	Positive	14.394	455.378	Unknown	[M+H]+	null	null	null	null	0.14606	4.78e-06	1.92544
395	Positive	17.408	648.586	low score: Solanesol_major	[M+NH4]+	C45H74O	Polyprenols	AFPLNGZPBSKHHQ-MEGGAXOGSA-N	CC(C)=CCCC(C)=CCCC(C)=CCCC(C)=CCCC(C)=CCCC(C)=CCCC(C)=CCCC(C)=CCCC(C)=CCO	0.14643	4.79e-06	1.65353
396	Positive	10.969	344.379	low score: DOCOSANOL	[M+NH4]+	C22H46O	Fatty alcohols	NOPFSRXAKWQILS-UHFFFAOYSA-N	OCCCCCCCCCCCCCCCCCCCCCC	0.13638	4.84e-06	1.74037
397	Positive	9.251	755.565	Unknown	[M+H]+	null	null	null	null	0.13537	4.85e-06	1.83068
398	Positive	5.916	122.105	2,6-Xylidine	[M+H]+	C8H11N	m-Xylenes	UFFBMTHBGFGIHF-UHFFFAOYSA-N	Cc1cccc(c1N)C	6.8384	4.85e-06	1.88398
399	Positive	7.916	228.217	Unknown	[M+H]+	null	null	null	null	0.19574	4.87e-06	1.96302
400	Negative	0.393	155.859	Unknown	[M-H]-	null	null	null	null	0.40856	4.87e-06	1.85674
401	Positive	16.724	464.413	Unknown	[M+H]+	null	null	null	null	0.16589	4.94e-06	2.11326
402	Positive	12.17	424.4	Unknown	[M+H]+	null	null	null	null	0.19187	4.94e-06	2.10151
403	Positive	0.793	201.022	low score: Meglutol	[M+K]+	C6H10O5	Hydroxy fatty acids	NPOAOTPXWNWTSH-UHFFFAOYSA-N	O=C(O)CC(O)(C)CC(=O)O	6.263	4.94e-06	1.4258
404	Positive	1.228	246.266	Unknown	[M+H]+	null	null	null	null	0.17877	4.94e-06	1.62434
405	Positive	10.858	522.797	Unknown	[M+H]+	null	null	null	null	0.19174	4.94e-06	1.61651
406	Positive	13.31	431.369	low score: SOLASODINE	[M+NH4]+	C27H43NO2	Spirosolanes and derivatives	KWVISVAMQJWJSZ-VKROHFNGSA-N	OC1CC2=CCC3C(CCC4(C)C3CC5OC6(NCC(C)CC6)C(C)C54)C2(C)CC1	9.2056	4.95e-06	1.42386
407	Positive	9.104	325.252	low score: allo-Protolichesterinic acid	[M+H]+	C19H32O4	Gamma butyrolactones	WZYZDHVPSZCEEP-IRXDYDNUSA-N	CCCCCCCCCCCCC[C@@H]1OC(=O)C(=C)[C@@H]1C(=O)O	0.19639	4.95e-06	1.8822
408	Positive	1.531	324.246	low score: Melophlin B/C/G/K/L/N/O	[M+H]+	C19H33NO3	N-alkylpyrrolidines	WBPPODSRZVXVJK-MSUUIHNZSA-N	CCCCCCCCCCCC/C(O)=C(C1=O)\C(C(N1C)C)=O	0.22593	4.95e-06	1.66577
409	Positive	17.801	441.333	no MS2: NCGC00169592-02_C29H46O4_3aH-Cyclopenta[a]chrysene-3a-carboxylic acid, 1-acetyleicosahydro-9-hydroxy-5a,5b,8,8,11a-pentamethyl-, (1R,3aS,5aR,5bR,9S,11aR)-	[M-H2O+H]+	C29H46O4	Oxosteroids	RVMPLOSJMIQORE-XPDAHERZSA-N	CC(=O)[C@@H]1CC[C@@]2(CC[C@]3(C)C(CCC4[C@@]5(C)CC[C@H](O)C(C)(C)C5CC[C@@]34C)C12)C(O)=O	0.20789	5.06e-06	1.94456
410	Positive	0.103	493.383	no MS2: 20(S),24(R)-Ocotillol	[M+H]+	C30H52O5	Triterpene saponins	XIGBHUXQOPWGDK-IAFUCFMFSA-N	OC1CC2C3(C)CCC(O)C(C)(C)C3C(O)CC2(C)C4(C)CCC(C14)C5(OC(CC5)C(O)(C)C)C	0.19197	5.13e-06	1.82175
411	Positive	10.492	658.381	Unknown	[M+H]+	null	null	null	null	38.219	5.26e-06	1.75758
412	Positive	8.109	564.358	low score: NCGC00381435-01!13-dodecan-2-yl-6-(1-hydroxyethyl)-3-(hydroxymethyl)-12-methyl-9-propan-2-yl-1-oxa-4,7,10-triazacyclotridecane-2,5,8,11-tetrone [IIN-based on: CCMSLIB00000848775]	[M+Na]+	C28H51N3O7	Cyclic depsipeptides	PVAWVKQDYYTSIE-UHFFFAOYSA-N	CCCCCCCCCCC(C)C1OC(=O)C(CO)NC(=O)C(NC(=O)C(NC(=O)C1C)C(C)C)C(C)O	0.17653	5.3e-06	1.47329
413	Positive	12.375	337.304	Unknown	[M+H]+	null	null	null	null	0.12896	5.31e-06	1.7598
414	Positive	2.257	100.075	N-Methyl-2-pyrrolidone	[M+H]+	C5H9NO	N-alkylpyrrolidines	SECXISVLQFMRJM-UHFFFAOYSA-N	CN1CCCC1=O	12.647	5.38e-06	1.92637
415	Positive	8.527	280.171	no MS2: Sibutramine	[M+H]+	C17H26ClN	Chlorobenzenes	UNAANXDKBXWMLN-UHFFFAOYSA-N	ClC1=CC=C(C=C1)C2(CCC2)C(N(C)C)CC(C)C	3.7775	5.38e-06	1.46626
416	Positive	13.346	713.578	Unknown	[M+H]+	null	null	null	null	0.10168	5.39e-06	1.47398
417	Positive	12.3	427.342	low score: 5Alpha-Cholestanol	[M+K]+	C27H48O	Cholesterols and derivatives	QYIXCDOBOSTCEI-QCYZZNICSA-N	OC1CCC2(C)C(CCC3C4CCC(C(C)CCCC(C)C)C4(C)CCC32)C1	0.14862	5.44e-06	1.99345
418	Positive	0.872	252.9	Unknown	[M+H]+	null	null	null	null	18.303	5.49e-06	1.757
419	Positive	10.15	330.361	Unknown	[M+H]+	null	null	null	null	0.14544	5.54e-06	1.98781
420	Positive	0.577	222.133	low score: Dihydrozeatin	[M+H]+	C10H15N5O	6-alkylaminopurines	XXFACTAYGKKOQB-UHFFFAOYSA-N	OCC(C)CCNC=1N=CNC2=NC=NC21	0.2176	5.56e-06	1.94393
421	Positive	15.513	397.305	low score: Unknown (carbon number 27); PlaSMA ID-2179	[M+H]+	C27H40O2	Unknown	null	null	0.15313	5.61e-06	1.75297
422	Positive	19.001	544.505	Unknown	[M+H]+	null	null	null	null	0.15803	5.62e-06	2.01714
423	Positive	18.991	708.571	Unknown	[M+H]+	null	null	null	null	0.14026	5.62e-06	1.92285
424	Positive	0.702	244.908	Unknown	[M+H]+	null	null	null	null	19.756	5.65e-06	1.56602
425	Positive	0.685	360.892	Unknown	[M+H]+	null	null	null	null	2.7899	5.73e-06	1.67392
426	Positive	15.854	381.417	Unknown	[M+H]+	null	null	null	null	0.14882	5.74e-06	1.89215
427	Positive	14.393	433.389	low score: (6E,10E,14E,18E)-2,6,10,15,19,23-hexamethyl-2,6,10,14,18,22-tetracosahexaene	[M+Na]+	C30H50	Triterpenoids	YYGNTYWPHWGJRM-AAJYLUCBSA-N	C(=C(C)C)CCC(=CCCC(=CCCC=C(C)CCC=C(C)CCC=C(C)C)C)C	0.1548	5.74e-06	1.78152
428	Positive	1.25	120.08	no MS2: Indoline	[M+H]+	C8H9N	Indolines	LPAGFVYQRIESJQ-UHFFFAOYSA-N	C1CC2=CC=CC=C2N1	6.9092	5.75e-06	1.70451
429	Positive	0.637	121.984	Unknown	[M+H]+	null	null	null	null	32.392	5.75e-06	1.8185
430	Positive	8.873	258.299	Unknown	[M+H]+	null	null	null	null	0.15625	5.75e-06	1.72857
431	Positive	12.294	387.34	Unknown	[M+H]+	null	null	null	null	0.15717	5.75e-06	1.88378
432	Positive	0.07	139.121	low score: Isophorone	[M+H]+	C9H14O	Cyclohexenones	HJOVHMDZYOCNQW-UHFFFAOYSA-N	CC1=CC(=O)CC(C)(C)C1	2.2652	5.81e-06	1.78081
433	Positive	8.403	437.231	low score: Nonaethylene glycol	[M+Na]+	C18H38O10	Polyethylene glycols	YZUUTMGDONTGTN-UHFFFAOYSA-N	OCCOCCOCCOCCOCCOCCOCCOCCOCCO	0.088799	5.81e-06	1.5629
434	Positive	12.296	450.418	Unknown	[M+H]+	null	null	null	null	0.15565	5.81e-06	1.97909
435	Positive	8.24	301.169	low score: 1-[4,5-bis(hydroxymethyl)-3-methoxy-2-methylphenoxy]-3-methylbutane-2,3-diol	[M+H]+	C15H24O6	Benzyl alcohols	MAQMWSUGBCIGLJ-UHFFFAOYSA-N	OCC1=CC(OCC(O)C(O)(C)C)=C(C(OC)=C1CO)C	0.36424	5.81e-06	1.43865
436	Positive	19.816	955.656	low score: (30E,34E)-2,6,10,14,18,22,26,30,34-nonamethyl-36-[(2R,3R,4S,5S,6R)-3,4,5-trihydroxy-6-(hydroxymethyl)oxan-2-yl]oxyhexatriaconta-2,30,34-triene-6,10,14,18,22,26,27-heptol	[M+K]+	C51H96O13	Polyterpenoids	MONOOAYGIBRELN-REQVTYDXSA-N	OCC1OC(OCC=C(C)CCC=C(C)CCC(O)C(O)(C)CCCC(O)(C)CCCC(O)(C)CCCC(O)(C)CCCC(O)(C)CCCC(O)(C)CCC=C(C)C)C(O)C(O)C1O	0.12513	5.81e-06	1.80018
437	Positive	14.283	431.424	Unknown	[M+H]+	null	null	null	null	0.10029	5.88e-06	1.46247
438	Positive	8.407	301.169	low score: adrenosterone	[M+H]+	C19H24O3	Androgens and derivatives	RZRPTBIGEANTGU-IRIMSJTPSA-N	O=C1C=C2CCC3C(C(=O)CC4(C(=O)CCC34)C)C2(C)CC1	0.34067	5.88e-06	1.56494
439	Positive	0.399	234.887	Unknown	[M+H]+	null	null	null	null	26.793	5.91e-06	1.66848
440	Positive	0.583	104.016	Unknown	[M+H]+	null	null	null	null	40.84	5.94e-06	1.67285
441	Positive	0.747	237.966	Unknown	[M+H]+	null	null	null	null	0.20905	6e-06	2.02698
442	Positive	1.316	224.148	low score: Camellimidazole D	[M+H]+	C10H17N5O	2-heteroaryl carboxamides	VTPXABIHFAGVJO-UHFFFAOYSA-N	CN1C2=C(N(CN(CN(C)C2=O)C)C)N=C1	0.24296	6.02e-06	1.75348
443	Positive	6.728	383.3	low score: Geranylgeranyl 1,4-hydroquinone	[M+H]+	C26H38O2	Diterpenoids	FIPAQYYZFDCRDD-FPFQZNTGSA-N	OC1=C(C/C=C(CC/C=C(C)/CC/C=C(C)/CC/C=C(C)\C)\C)C=C(O)C=C1	0.19009	6.07e-06	2.0566
444	Positive	14.296	782.628	Unknown	[M+H]+	null	null	null	null	0.26257	6.07e-06	1.74051
445	Positive	8.583	482.367	Unknown	[M+H]+	null	null	null	null	0.18267	6.11e-06	1.76553
446	Positive	13.556	576.384	low score: Unknown (carbon number 33); PlaSMA ID-2912	[M+H]+	C33H53NO7	Unknown	null	null	0.10231	6.16e-06	1.69215
447	Positive	12.221	401.301	Unknown	[M+H]+	null	null	null	null	0.12951	6.16e-06	1.55133
448	Positive	7.356	244.211	low score: Phencyclidine	[M+H]+	C17H25N	Aralkylamines	JTJMJGYZQZDUJJ-UHFFFAOYSA-N	C1CCC(CC1)(C2=CC=CC=C2)N3CCCCC3	0.23238	6.16e-06	1.99402
449	Positive	17.948	387.381	Unknown	[M+H]+	null	null	null	null	0.13551	6.19e-06	1.74395
450	Positive	14.621	431.425	Unknown	[M+H]+	null	null	null	null	0.13754	6.19e-06	1.5945
451	Positive	9.344	688.342	low score: Acetylaconitine	[M+H]+	C36H49NO12	Aconitane-type diterpenoid alkaloids	RIPYIJVYDYCPKW-WEVHBWGYSA-N	CCN1CC2(COC)[C@H]3C(OC)C4[C@@H]1C3([C@@H]1C[C@@]3(O)C(OC(=O)C5=CC=CC=C5)[C@@H]1[C@]4(OC(C)=O)C(O)[C@@H]3OC)C(CC2OC(C)=O)OC	0.14749	6.22e-06	1.4122
452	Positive	1.034	230.959	Unknown	[M+H]+	null	null	null	null	0.18073	6.23e-06	1.92716
453	Positive	15.026	284.321	Unknown	[M+H]+	null	null	null	null	0.22289	6.23e-06	1.72491
454	Positive	10.021	510.401	Unknown	[M+H]+	null	null	null	null	0.18146	6.25e-06	1.72247
455	Positive	0.569	118.098	low score: betaine	[M+H]+	C5H11NO2	Alpha amino acids	KWIUHFFTVRNATP-UHFFFAOYSA-N	O=C([O-])C[N+](C)(C)C	0.28701	6.31e-06	1.85622
456	Positive	0.665	389.843	Unknown	[M+H]+	null	null	null	null	29.607	6.34e-06	1.6847
457	Positive	0.568	379.815	Unknown	[M+H]+	null	null	null	null	66.594	6.35e-06	1.96171
458	Positive	0.236	784.649	Unknown	[M+H]+	null	null	null	null	0.1579	6.47e-06	2.00279
459	Negative	19.738	197.801	Unknown	[M-H]-	null	null	null	null	0.39455	6.63e-06	1.60731
460	Positive	0.792	141.968	Unknown	[M+H]+	null	null	null	null	10.893	6.7e-06	1.99476
461	Positive	13.963	699.57	Unknown	[M+H]+	null	null	null	null	0.082772	6.74e-06	1.53556
462	Positive	0.709	277.877	Unknown	[M+H]+	null	null	null	null	14.867	6.77e-06	1.57293
463	Positive	17.745	391.318	Octyl-3,5-di-tert-butyl-4-hydroxyhydrocinnamate	[M+H]+	C25H42O3	Fatty alcohol esters	CFXCGWWYIDZIMU-UHFFFAOYSA-N	CCCCCCCCOC(=O)CCC1=CC(=C(O)C(=C1)C(C)(C)C)C(C)(C)C	0.23765	6.77e-06	1.94158
464	Positive	10.413	356.385	Unknown	[M+H]+	null	null	null	null	0.16824	6.9e-06	1.98408
465	Positive	12.085	377.3	low score: "(4R)-4-((3R,5S,9S,10S,13R,14S,17R)-3-hydroxy-10,13-dimethylhexadecahydro-1H-cyclopenta[a]phenanthren-17-yl)pentanoic acid"	[M+H]+	C24H40O3	Monohydroxy bile acids, alcohols and derivatives	SMEROWZSTRWXGI-NWFSOSCSSA-N	C[C@@]12[C@](CC[C@]3([H])[C@@H]2CC[C@@]4(C)[C@H]3CC[C@@H]4[C@@H](CCC(O)=O)C)([H])C[C@H](O)CC1	0.14172	6.95e-06	1.65109
466	Positive	1.305	371.124	low score: Ajugol	[M+ACN+Na]+	C15H24O9	Iridoid O-glycosides	VELYAQRXBJLJAK-XKKWFBPMSA-N	OCC1OC(OC2OC=CC3C(O)CC(O)(C)C23)C(O)C(O)C1O	5.4621	6.97e-06	1.62094
467	Positive	10.595	350.356	Unknown	[M+H]+	null	null	null	null	0.19908	6.97e-06	1.77507
468	Positive	12.698	482.447	low score: Lactosyl(?) C12 Ceramide	[M+H]+	C30H59NO3	Ceramides	HXFPPRPLRSPNIB-VARSQMIESA-N	CCCCCCCCCCCCC/C=C/[C@H]([C@H](CO)NC(=O)CCCCCCCCCCC)O	0.23284	7.17e-06	1.44886
469	Positive	8.12	867.446	low score: Ferintoic acid A	[M+H]+	C46H58N8O9	Oligopeptides	ZATXZWLJJMKQDB-AOWMEVDFSA-N	CC(C)[C@@H]1NC(=O)[C@@H](CCCCNC(=O)[C@H](CC2=CC=CC=C2)NC(=O)[C@H](C)N(C)C(=O)[C@H](CCC2=CC=C(O)C=C2)NC1=O)NC(=O)NC(CC1=CNC2=C1C=CC=C2)C(O)=O	0.077703	7.34e-06	1.66269
470	Positive	12.536	430.425	Unknown	[M+H]+	null	null	null	null	0.18065	7.37e-06	2.01088
471	Positive	8.765	518.763	Unknown	[M+H]+	null	null	null	null	0.18639	7.37e-06	1.71128
472	Positive	0.417	453.814	Unknown	[M+H]+	null	null	null	null	9.1071	7.39e-06	1.41401
473	Positive	0.067	780.626	Unknown	[M+H]+	null	null	null	null	0.18322	7.46e-06	1.69824
474	Positive	0.133	488.431	Unknown	[M+H]+	null	null	null	null	0.17888	7.47e-06	2.02092
475	Positive	11.047	280.187	low score: Etamiphylline	[M+H]+	C13H21N5O2	Xanthines	AWKLBIOQCIORSB-UHFFFAOYSA-N	[H]C([H])([H])C([H])([H])N(C([H])([H])C([H])([H])[H])C([H])([H])C([H])([H])n(c([H])2)c(C(=O)1)c(n2)N(C([H])([H])[H])C(=O)N(C([H])([H])[H])1	0.36083	7.52e-06	1.53571
476	Positive	13.352	369.273	low score: Dihydromuronic acid	[M+K]+	C21H36O5	Gamma butyrolactones	SPGPUDJMXMJNCU-JLAWEPINSA-N	CC(=O)CCCCCCCCCCCCC[C@@H]1C(C(C)C(=O)O1)C(=O)O	0.16231	7.53e-06	1.75991
477	Positive	0.396	228.892	Unknown	[M+H]+	null	null	null	null	28.19	7.54e-06	1.88597
478	Positive	7.866	276.221	low score: Unknown (carbon number 14); PlaSMA ID-1291	[M+H]+	C14H29NO4	Unknown	null	null	0.17864	7.58e-06	2.03273
479	Positive	10.493	613.301	low score: (2R,3R,4S,6R)-6-((10-formyl-5,14-dihydroxy-13-methyl-17-(5-oxo-2,5-dihydrofuran-3-yl)hexadecahydro-1H-cyclopenta[a]phenanthren-3-yl)oxy)-4-methoxy-2-methyltetrahydro-2H-pyran-3-yl acetate	[M+Na]+	C32H46O10	Cardenolide glycosides and derivatives	FPIVCKLVSVCJHW-UHFFFAOYSA-N	O=CC12CCC(OC3OC(C)C(OC(=O)C)C(OC)C3)CC2(O)CCC4C1CCC5(C)C(C6=CC(=O)OC6)CCC45O	27.528	7.58e-06	1.7977
480	Positive	7.358	432.277	low score: NCGC00381130-01!methyl (2E,8E)-9-[3a-hydroxy-6,7-dimethyl-1-(2-methylpropyl)-3-oxo-2,4,7,7a-tetrahydro-1H-isoindol-4-yl]-4,5-dihydroxy-8-methylnona-2,8-dienoate [IIN-based on: CCMSLIB00000846918]	[M-H2O+H]+	C25H39NO6	Bicyclic monoterpenoids	YUXUTEAAGHFKKH-MKQCFFQWSA-N	COC(=O)\\C=C\\C(O)C(O)CC\\C(C)=C\\C1C=C(C)C(C)C2C(CC(C)C)NC(=O)C12O	0.17801	7.62e-06	1.99623
481	Positive	18.982	521.423	Unknown	[M+H]+	null	null	null	null	0.18539	7.69e-06	1.72637
482	Positive	12.016	556.493	Unknown	[M+H]+	null	null	null	null	0.1981	7.69e-06	1.98351
483	Positive	1.038	222.899	Unknown	[M+H]+	null	null	null	null	0.22904	7.69e-06	1.58316
484	Positive	8.69	606.348	low score: NCGC00386085-01_C32H44O10_	[M+NH4]+	C32H44O10	Oxepanes	MPCIDUFOTGXABA-UHFFFAOYSA-N	CC1OC\23C/4=C(/C(O)C5C(C)(CCC6OC(CC(OC(C)=O)C56C)C(C)(C)O)O4)C(=O)\C=C2C(C)C(OC(C)=O)C13C	0.17087	7.76e-06	1.76061
485	Positive	18.883	708.572	Unknown	[M+H]+	null	null	null	null	0.15221	7.81e-06	1.97214
486	Positive	16.79	664.595	Unknown	[M+H]+	null	null	null	null	0.16831	7.82e-06	2.05214
487	Positive	8.124	486.313	low score: "N-((4R)-4-((3R,5S,7S,9S,10S,13R,14S,17R)-3,7-dihydroxy-10,13-dimethylhexadecahydro-1H-cyclopenta[a]phenanthren-17-yl)pentanoyl)-N-methylglycine"	[M+H-2H2O]+	C27H45NO5	Glycinated bile acids and derivatives	YZYBIGOLMMAZFK-IMLYGNJHSA-N	C[C@H](CCC(N(CC(O)=O)C)=O)[C@H]1CC[C@H]2[C@]([C@@H]3CC[C@@]21C)([H])[C@@H](O)C[C@@]4([H])[C@]3(C)CC[C@@H](O)C4	0.17384	7.82e-06	1.70581
488	Positive	12.512	425.21	low score: Benazepril	[M+H]+	C24H28N2O5	Dipeptides	XPCFTKFZXHTYIP-PMACEKPBSA-N	O=C(O)CN1C(=O)C(NC(C(=O)OCC)CCC=2C=CC=CC2)CCC=3C=CC=CC31	29.717	7.83e-06	1.69258
489	Positive	13.352	353.298	Unknown	[M+H]+	null	null	null	null	0.16059	7.83e-06	1.87229
490	Positive	7.866	234.206	Unknown	[M+H]+	null	null	null	null	0.19054	7.83e-06	1.77054
491	Positive	1.046	492.897	Unknown	[M+H]+	null	null	null	null	0.29335	7.83e-06	1.45565
492	Positive	14.306	380.14	no MS2: NCGC00384901-01_C24H17N3O2_(7Z)-7-Benzylidene-6-methyl-6,7-dihydroquinazolino[3,2-a][1,4]benzodiazepine-5,13-dione	[M+H]+	C24H17N3O2	Pyrimidodiazepines	HXDZMNFJQNZXKW-QNGOZBTKSA-N	CN1C(=O)C2=C(C=CC=C2)N3C(=O)C4=C(C=CC=C4)/N=C3/C1=C/C5=CC=CC=C5	33.122	7.85e-06	1.47232
493	Positive	13.014	233.139	low score: 3-(sec-butyl)-2-hydroxy-3H-benzo[e][1,4]diazepin-5(4H)-one	[M+H]+	C13H16N2O2	1,4-benzodiazepines	VKZICKDDJSFAAG-UHFFFAOYSA-N	O=C1NC(C(O)=NC=2C=CC=CC12)C(C)CC	0.19645	7.89e-06	1.79572
494	Positive	0.428	300.899	Unknown	[M+H]+	null	null	null	null	3.2347	7.94e-06	1.36766
495	Positive	9.985	256.322	Unknown	[M+H]+	null	null	null	null	0.18622	7.94e-06	2.05321
496	Positive	0.275	441.336	low score: NCGC00169592-02_C29H46O4_3aH-Cyclopenta[a]chrysene-3a-carboxylic acid, 1-acetyleicosahydro-9-hydroxy-5a,5b,8,8,11a-pentamethyl-, (1R,3aS,5aR,5bR,9S,11aR)-	[M-H2O+H]+	C29H46O4	Oxosteroids	RVMPLOSJMIQORE-XPDAHERZSA-N	CC(=O)[C@@H]1CC[C@@]2(CC[C@]3(C)C(CCC4[C@@]5(C)CC[C@H](O)C(C)(C)C5CC[C@@]34C)C12)C(O)=O	0.20021	7.94e-06	2.00037
497	Positive	8.677	478.335	low score: N-(4-((6aR,8aS)-4-hydroxy-6a,8a,9-trimethyl-3,4,5,6,6a,6b,7,8,8a,8b,11a,12,12a,12b-tetradecahydro-1H-naphtho[2',1':4,5]indeno[2,1-b]furan-10-yl)-2-methylbutyl)acetamide	[M+Na]+	C29H45NO3	Furostanes and derivatives	CNHACNVJEKRLHF-UDCIVARJSA-N	O=C(NCC(C)CCC=1OC2CC3C4CC=C5CC(O)CCC5(C)C4CCC3(C)C2C1C)C	0.21418	7.95e-06	1.82189
498	Positive	9.327	603.356	low score: (1S,2S,5R,7R,10S,11S,14R,16R,19S,20S,23R,25R)-5,14-diethyl-2,11,20,23-tetramethyl-4,13,22,28,29,30-hexaoxatetracyclo[23.2.1.1?,??.1??,??]triacontane-3,12,21-trione	[M+Na]+	C32H52O9	Macrolides and analogues	MXZXIBZNZUOHER-VHWZNAHMSA-N	O=C1OC(C)CC2OC(CC2)C(C(=O)OC(CC)CC3OC(CC3)C(C(=O)OC(CC)CC4OC(CC4)C1C)C)C	0.23119	8.07e-06	1.62118
499	Positive	0.503	154.977	Unknown	[M+H]+	null	null	null	null	7.218	8.08e-06	1.91386
500	Positive	16.819	692.627	Unknown	[M+H]+	null	null	null	null	0.16889	8.18e-06	1.8355
501	Positive	13.349	686.634	Unknown	[M+H]+	null	null	null	null	0.16954	8.19e-06	1.80379
502	Positive	9.167	526.341	low score: NCGC00380724-01_C28H47NO8_(3R,5R,6S,7S,9R,11E,13S,14R)-14-Ethyl-13-hydroxy-3,5,7,9,13-pentamethyl-2,4,10-trioxooxacyclotetradec-11-en-6-yl 3,4,6-trideoxy-3-(dimethylamino)-D-xylo-hexopyranoside	[M+Na]+	C28H47NO8	Aminoglycosides	UZQBOFAUUTZOQE-SOSMEOBRSA-N	CC[C@H]1OC(=O)[C@H](C)C(=O)[C@H](C)[C@@H](OC2O[C@H](C)C[C@@H]([C@H]2O)N(C)C)[C@@H](C)C[C@@H](C)C(=O)\C=C\[C@]1(C)O	0.225	8.34e-06	1.69124
503	Negative	6.712	678.183	Unknown	[M-H]-	null	null	null	null	0.073895	8.41e-06	1.36721
504	Positive	15.852	336.356	Unknown	[M+H]+	null	null	null	null	0.18435	8.43e-06	1.49756
505	Positive	10.382	452.361	Unknown	[M+H]+	null	null	null	null	0.18261	8.46e-06	1.77504
506	Positive	12.822	552.449	Unknown	[M+H]+	null	null	null	null	0.18276	8.5e-06	1.85416
507	Positive	8.124	437.232	low score: Nonaethylene glycol	[M+Na]+	C18H38O10	Polyethylene glycols	YZUUTMGDONTGTN-UHFFFAOYSA-N	OCCOCCOCCOCCOCCOCCOCCOCCOCCO	0.1323	8.63e-06	1.85127
508	Positive	8.136	225.216	low score: N~1~,N~4~-bis(3-aminopropyl)-1,4-butanediamine	[M+Na]+	C10H26N4	Dialkylamines	PFNFFQXMRSDOHW-UHFFFAOYSA-N	NCCCNCCCCNCCCN	0.24818	8.67e-06	1.705
509	Positive	0.452	130.966	Unknown	[M+H]+	null	null	null	null	87.236	8.69e-06	1.64164
510	Positive	1.528	170.169	Unknown	[M+H]+	null	null	null	null	0.1842	8.71e-06	2.05869
511	Positive	9.613	546.394	Unknown	[M+H]+	null	null	null	null	0.21263	8.71e-06	1.87396
512	Positive	0.303	759.633	Unknown	[M+H]+	null	null	null	null	0.20048	8.78e-06	1.75483
513	Positive	12.183	487.397	low score: hyperin	[M+Na]+	C21H20O12	Flavonoid-3-O-glycosides	OVSQVDMCBVZWGM-DTGCRPNFSA-N	O=C1C(OC2OC(CO)C(O)C(O)C2O)=C(OC=3C=C(O)C=C(O)C13)C=4C=CC(O)=C(O)C4	8.7276	8.8e-06	1.56741
514	Positive	0.744	262.874	Unknown	[M+H]+	null	null	null	null	49.205	8.82e-06	1.9639
515	Positive	14.394	415.38	low score: (3beta)-stigmast-5-en-3-ol	[M+H]+	C29H50O	Stigmastanes and derivatives	KZJWDPNRJALLNS-VJSFXXLFSA-N	OC1CC2=CCC3C(CCC4(C)C(CCC34)C(C)CCC(CC)C(C)C)C2(C)CC1	0.15895	8.82e-06	1.65876
516	Positive	12.515	377.292	Unknown	[M+H]+	null	null	null	null	0.16659	8.82e-06	1.65617
517	Positive	0.476	105.935	Unknown	[M+H]+	null	null	null	null	43.151	8.84e-06	1.42517
518	Positive	0.607	298.852	Unknown	[M+H]+	null	null	null	null	59.829	8.84e-06	1.86902
519	Positive	14.145	670.528	Unknown	[M+H]+	null	null	null	null	0.12069	8.84e-06	1.6976
520	Positive	13.352	331.315	low score: MMV687273	[M+H]+	C22H38N2	Monoterpenoids	JFIBVDBTCDTBRH-IDUWFGFVSA-N	C(=C(C)C)CCC(=CCNCCNC1C2CC3CC(C2)CC1C3)C	0.16839	8.84e-06	1.86438
521	Positive	15.522	449.325	low score: "(6R)-3-hydroxy-2-methyl-6-((3R,5S,7R,8R,9S,10S,12S,13R,14S,17R)-3,7,12-trihydroxy-10,13-dimethylhexadecahydro-1H-cyclopenta[a]phenanthren-17-yl)heptanoic acid"	[M-H2O+H]+	C27H46O6	Tetrahydroxy bile acids, alcohols and derivatives	FAYYTQMQTAKHRM-QDVPYJSNSA-N	C[C@@H]([C@H]1CC[C@]2([H])[C@]1(C)[C@@H](O)C[C@@]3([H])[C@@]2([H])[C@H](O)C[C@@]4([H])[C@]3(C)CC[C@@H](O)C4)CCC(O)C(C)C(O)=O	0.17078	8.84e-06	1.71868
522	Positive	1.417	170.17	Unknown	[M+H]+	null	null	null	null	0.18184	8.84e-06	1.86279
523	Positive	1.893	193.944	Unknown	[M+H]+	null	null	null	null	14.988	8.87e-06	1.68317
524	Positive	1.035	366.943	Unknown	[M+H]+	null	null	null	null	0.25106	8.87e-06	1.68551
525	Positive	12.026	287.243	low score: NCGC00179862-03_C20H32O2_1-Naphthalenecarboxaldehyde, decahydro-5-[(3E)-5-hydroxy-3-methyl-3-penten-1-yl]-1,4a-dimethyl-6-methylene-, (1R,4aR,5S)-	[M-H2O+H]+	C20H32O2	Diterpenoids	FSLWKIHHQUNBQK-LDGRNEMHSA-N	C\C(CC[C@H]1C(=C)CCC2[C@@](C)(CCC[C@]12C)C=O)=C/CO	0.23102	8.95e-06	2.05426
526	Positive	8.125	453.21	low score: NCGC00384740-01_C21H34O9_2(1H)-Azulenone, 6-(beta-D-glucopyranosyloxy)-4,5,6,7,8,8a-hexahydro-5-hydroxy-5-(1-hydroxy-1-methylethyl)-3,8-dimethyl-	[M+Na]+	C21H34O9	Terpene glycosides	HVAVGMDRUJHUOH-UURFWDJCSA-N	CC1CC(O[C@@H]2O[C@H](CO)[C@@H](O)[C@H](O)[C@H]2O)C(O)(CC/3=C(C)/C(=O)CC13)C(C)(C)O	0.11942	8.95e-06	1.72346
527	Positive	8.457	525.315	no MS2: NCGC00180395-03!(2E,6E,12E)-18-(2,6-dioxopiperidin-4-yl)-9,11-dihydroxy-8-methoxy-10,12,14-trimethyl-15-oxooctadeca-2,6,12-trienoic acid	[M+NH4]+	C27H41NO8	Lineolic acids and derivatives	YQDJUXPUIRGKNV-MNOLRWOYSA-N	COC(\C=C\CC\C=C\C(O)=O)C(O)C(C)C(O)C(\C)=C\C(C)C(=O)CCCC1CC(=O)NC(=O)C1	4.6189	9.05e-06	1.39263
528	Positive	1.029	172.992	no MS2: Tartaric acid	[M+Na]+	C4H6O6	Sugar acids and derivatives	FEWJPZIEWOKRBE-UHFFFAOYSA-N	O=C(O)C(O)C(O)C(=O)O	0.23111	9.06e-06	1.91054
529	Positive	0.7	112.964	Unknown	[M+H]+	null	null	null	null	45.622	9.09e-06	1.77506
530	Positive	11.793	560.42	Unknown	[M+H]+	null	null	null	null	0.17853	9.29e-06	1.72912
531	Positive	14.06	670.527	Unknown	[M+H]+	null	null	null	null	0.11807	9.33e-06	1.67795
532	Positive	17.776	376.331	low score: N-(3-Methoxybenzyl)palmitamide	[M+H]+	C24H41NO2	Anisoles	FIQGQTITXPTKIY-UHFFFAOYSA-N	O=C(NCC=1C=CC=C(OC)C1)CCCCCCCCCCCCCCC	0.17101	9.42e-06	1.81679
533	Positive	1.036	232.955	Unknown	[M+H]+	null	null	null	null	0.18625	9.46e-06	1.70143
534	Positive	9.254	496.385	1-O-hexadecyl-2-C-methyl-3-phosphatidylcholine	[M+H]+	C25H54NO6P	Glycerophosphocholines	BZLKOORCGCYQJZ-UHFFFAOYSA-N	CCCCCCCCCCCCCCCCOCC(C)(COP(=O)([O-])OCC[N+](C)(C)C)O	0.19329	9.52e-06	1.80672
535	Positive	0.47	286.855	Unknown	[M+H]+	null	null	null	null	203.63	9.64e-06	1.96671
536	Positive	7.989	158.165	Unknown	[M+H]+	null	null	null	null	28.199	9.64e-06	1.9911
537	Positive	12.51	433.242	low score: [2-hydroxy-3-phosphonooxypropyl] hexadecanoate	[M+2Na-H]+	C19H39O7P	1-acylglycerol-3-phosphates	YNDYKPRNFWPPFU-UHFFFAOYSA-N	CCCCCCCCCCCCCCCC(=O)OCC(COP(=O)(O)O)O	31.246	9.64e-06	1.63061
538	Positive	11.264	375.284	low score: NCGC00380376-01_C22H40O3_1-Naphthalenepentanol, decahydro-2-hydroxy-gamma,2,5,5,8a-pentamethyl-, alpha-acetate	[M+Na]+	C22H40O3	Diterpenoids	NZKLGQRMNDHSPV-UHFFFAOYSA-N	CC(CCOC(C)=O)CCC1C(C)(O)CCC2C(C)(C)CCCC12C	0.16064	9.64e-06	1.73875
539	Positive	14.536	796.682	Unknown	[M+H]+	null	null	null	null	0.18259	9.65e-06	1.92628
540	Positive	18.355	599.554	Unknown	[M+H]+	null	null	null	null	0.15851	9.76e-06	1.48251
541	Positive	10.722	504.343	low score: NCGC00380972-01_C32H45N3O2_	[M+H]+	C32H45N3O2	Pyrroloindoles	IXMZEPKYPFQFJN-QNFIBVQNSA-N	CC(C)C[C@@H]1NC(=O)[C@@H]2C[C@]34C[C@@H]5[C@@]6(C)CCCC(C)(C)C6CC[C@@]5(C)N([C@H]3N2C1=O)C7=CC=CC=C47	0.38429	9.76e-06	1.59903
542	Positive	0.579	140.961	Unknown	[M+H]+	null	null	null	null	24.897	9.76e-06	1.88044
543	Positive	15.161	645.526	Unknown	[M+H]+	null	null	null	null	0.18881	9.86e-06	1.88793
544	Positive	17.773	697.719	Unknown	[M+H]+	null	null	null	null	0.15692	9.88e-06	1.66249
545	Positive	6.228	289.148	low score: PHA-00568487	[M+H]+	C16H20N2O3	Benzo-1,4-dioxanes	LUVXHMJTVXZFPD-ZDUSSCGKSA-N	O=C(N[C@H]1CN2CCC1CC2)C1=CC2=C(OCCO2)C=C1	6.3045	9.88e-06	1.4639
546	Positive	12.595	424.297	low score: NCGC00380397-01_C25H39NO3_(7E)-3-Isobutyl-13-methoxy-4,5,8-trimethyl-3,3a,4,6a,9,10,11,12,13,14-decahydro-1H-cycloundeca[d]isoindole-1,15(2H)-dione	[M+Na]+	C25H39NO3	Isoindolones	BECNNJLLIXQSGY-UHFFFAOYSA-N	COC1CCCCC(=C\C2\C=C(C)/C(C)C3C(CC(C)C)NC(=O)C23C(=O)C1)\C	8.1643	9.88e-06	1.63359
547	Positive	10.854	506.4	Unknown	[M+H]+	null	null	null	null	0.19777	9.96e-06	1.80135
548	Positive	10.082	576.464	no MS2: Ceramide (d18:1/16:0)	[M+K]+	C34H67NO3	Ceramides	YDNKGFDKKRUKPY-TURZORIXSA-N	CCCCCCCCCCCCCCCC(=O)N[C@@H](CO)[C@@H](/C=C/CCCCCCCCCCCCC)O	0.16409	1e-05	1.55977
549	Positive	9.815	304.321	Unknown	[M+H]+	null	null	null	null	0.19313	1.01e-05	2.08005
550	Positive	0.469	113.966	Unknown	[M+H]+	null	null	null	null	75.592	1.01e-05	1.60713
551	Positive	14.976	442.441	Unknown	[M+H]+	null	null	null	null	0.18829	1.01e-05	2.06424
552	Positive	0.686	264.869	Unknown	[M+H]+	null	null	null	null	94.42	1.01e-05	1.81886
553	Positive	1.077	154.071	no MS2: Hypoxanthine	[M+NH4]+	C5H4N4O	Hypoxanthines	FDGQSTZJBFJUBT-UHFFFAOYSA-N	OC1=NC=NC=2NC=NC12	0.37104	1.01e-05	1.34762
554	Positive	10.864	555.4	Unknown	[M+H]+	null	null	null	null	0.22174	1.01e-05	1.5968
555	Positive	17.768	383.431	low score: 1-hexacosanol	[M+H]+	C26H54O	Fatty alcohols	IRHTZOCLLONTOC-UHFFFAOYSA-N	OCCCCCCCCCCCCCCCCCCCCCCCCCC	0.1775	1.02e-05	2.00481
556	Positive	11.708	402.428	Unknown	[M+H]+	null	null	null	null	0.17837	1.02e-05	1.99978
557	Positive	0.448	310.839	Unknown	[M+H]+	null	null	null	null	29.844	1.02e-05	1.66629
558	Positive	9.264	518.357	low score: "Orlistat (Alli, Xenical)"	[M+Na]+	C29H53NO5	Leucine and derivatives	AHLBNYSZXLDEJQ-FWEHEUNISA-N	C1([C@H]([C@@H](O1)C[C@H](CCCCCCCCCCC)OC(=O)[C@H](CC(C)C)NC(=O)[H])CCCCCC)=O	0.22945	1.04e-05	1.62197
559	Positive	12.753	904.663	Unknown	[M+H]+	null	null	null	null	0.095827	1.04e-05	1.50337
560	Positive	0.444	296.885	Unknown	[M+H]+	null	null	null	null	38.39	1.05e-05	1.71328
561	Positive	10.77	426.393	low score: N-Octanoylsphingosine,D-erythro	[M+H]+	C26H51NO3	Ceramides	APDLCSPGWPLYEQ-WRBRXSDHSA-N	CCCCCCCCCCCCCC=CC(C(CO)NC(=O)CCCCCCC)O	0.15196	1.05e-05	1.46709
562	Positive	1.474	574.34	low score: (3S,10R,13R)-10,13-dimethyl-17-octyl-2,3,4,7,8,9,10,11,12,13,14,15,16,17-tetradecahydro-1H-cyclopenta[a]phenanthren-3-yl (4-nitrophenyl) carbonate	[M+Na]+	C34H49NO5	Androstane steroids	AFNDTSIACJAGSO-ZNBDOVCMSA-N	O=C(OC1=CC=C(C=C1)[N+](=O)[O-])OC2CC3=CCC4C(CCC5(C)C(CCCCCCCC)CCC45)C3(C)CC2	0.17843	1.05e-05	1.75054
563	Positive	12.294	405.357	low score: pentacosanoic acid	[M+Na]+	C25H50O2	Very long-chain fatty acids	MWMPEAHGUXCSMY-UHFFFAOYSA-N	O=C(O)CCCCCCCCCCCCCCCCCCCCCCCC	0.17673	1.06e-05	1.81656
564	Positive	15.517	742.688	Unknown	[M+H]+	null	null	null	null	0.18248	1.06e-05	1.75778
565	Positive	7.478	274.295	Unknown	[M+H]+	null	null	null	null	0.21863	1.07e-05	1.65451
566	Positive	0.638	109.951	Unknown	[M+H]+	null	null	null	null	19.351	1.08e-05	1.6814
567	Positive	0.597	209.935	Unknown	[M+H]+	null	null	null	null	28.948	1.08e-05	1.75396
568	Positive	12.515	372.337	low score: NCGC00380102-01!3-hexadecyl-4-methoxy-5-methyloxolan-2-one	[M+NH4]+	C22H42O3	Gamma butyrolactones	DJNFXUFERDZHCD-UHFFFAOYSA-N	CCCCCCCCCCCCCCCCC1C(OC)C(C)OC1=O	0.28948	1.08e-05	1.67248
569	Positive	6.601	324.243	Unknown	[M+H]+	null	null	null	null	0.26543	1.12e-05	1.64661
570	Positive	11.243	336.353	Unknown	[M+H]+	null	null	null	null	0.2992	1.12e-05	1.20405
571	Positive	0.459	112.956	Unknown	[M+H]+	null	null	null	null	50.083	1.13e-05	1.57124
572	Positive	13.35	313.303	low score: arachidic acid_64.0%	[M+H]+	C20H40O2	Long-chain fatty acids	VKOBVWXKNCXXDE-UHFFFAOYSA-N	CCCCCCCCCCCCCCCCCCCC(=O)O	0.17787	1.14e-05	1.87957
573	Positive	12.757	526.472	Unknown	[M+H]+	null	null	null	null	0.33906	1.14e-05	1.83526
574	Positive	6.102	560.271	no MS2: (1R,7S,8E,9S,14S,15S,17R)-8-ethylidene-15-(1-hydroxypropan-2-yl)-17-methyl-7-{[(2S,3R,4S,5S,6R)-3,4,5-trihydroxy-6-(hydroxymethyl)oxan-2-yl]oxy}-2,6,12-trioxatricyclo[12.2.1.0?,?]heptadec-4-ene-3,11-dione_major	[M+NH4]+	C26H38O12	O-glycosyl compounds	NRVMCZSNPIHCNL-KJTZQEHHSA-N	CC=C1C(OC2OC(CO)C(O)C(O)C2O)OC=C2C(=O)OC3CC(C(C)CO)C(COC(=O)CC21)C3C	6.176	1.14e-05	1.57819
575	Positive	10.222	605.352	Unknown	[M+H]+	null	null	null	null	21.417	1.15e-05	1.67643
576	Positive	0.224	786.666	Unknown	[M+H]+	null	null	null	null	0.12072	1.15e-05	1.675
577	Positive	8.522	551.352	Unknown	[M+H]+	null	null	null	null	8.8863	1.16e-05	1.50529
578	Positive	8.998	524.336	low score: Methionine conjugated chenodeoxycholic acid	[M+H]+	C29H49NO5S	Glycinated bile acids and derivatives	CDNGTOVFEUSMMG-AVINCHNBSA-N	C[C@H](CCC(N[C@@H](CCSC)C(O)=O)=O)[C@H]1CC[C@@]2([H])[C@]3([H])[C@H](O)C[C@]4([H])C[C@H](O)CC[C@]4(C)[C@H]3CC[C@@]21C	13.767	1.16e-05	1.67304
579	Positive	0.427	258.904	Unknown	[M+H]+	null	null	null	null	17.327	1.16e-05	1.3478
580	Positive	12.29	422.385	Unknown	[M+H]+	null	null	null	null	0.20683	1.16e-05	1.92902
581	Positive	0.748	113.972	Unknown	[M+H]+	null	null	null	null	45.014	1.17e-05	1.856
582	Positive	0.443	210.926	Unknown	[M+H]+	null	null	null	null	18.929	1.17e-05	1.67657
583	Positive	10.674	239.183	Unknown	[M+H]+	null	null	null	null	0.40379	1.17e-05	1.3925
584	Positive	10.064	548.412	Unknown	[M+H]+	null	null	null	null	0.21196	1.17e-05	1.73093
585	Positive	15.518	381.33	Unknown	[M+H]+	null	null	null	null	0.18238	1.17e-05	1.86799
586	Positive	8.533	539.349	low score: milnamide A	[M+H]+	C31H46N4O4	Beta carbolines	DTDKDYCVVOKSAV-MNDPQUGUSA-N	CC(C(N(C(C(NC(C1C(C)(C(C2=CC=CC=C23)=C(CN1C)N3C)C)=O)C(C)(C)C)=O)C)/C=C(C(O)=O)/C)C	21.393	1.17e-05	1.5142
587	Positive	15.526	770.723	Unknown	[M+H]+	null	null	null	null	0.18667	1.17e-05	1.94631
588	Positive	7.102	970.888	Unknown	[M+H]+	null	null	null	null	0.18509	1.17e-05	1.93102
589	Positive	0.492	300.851	Unknown	[M+H]+	null	null	null	null	41.239	1.18e-05	1.8739
590	Positive	8.08	452.313	low score: Chasmanine	[M+H]+	C25H41NO6	Aconitane-type diterpenoid alkaloids	DBODJJZRZFZBBD-XXYWQWTJSA-N	OC1C2CC3C1C(O)(CC2OC)C4C(OC)C5C6(COC)CN(CC)C4C35C(OC)CC6	6.56	1.18e-05	1.3246
591	Positive	1.956	102.02	Unknown	[M+H]+	null	null	null	null	12.274	1.19e-05	1.78563
592	Positive	0.685	114.975	Unknown	[M+H]+	null	null	null	null	5.1181	1.19e-05	1.66908
593	Positive	1.021	164.935	Unknown	[M+H]+	null	null	null	null	0.26019	1.19e-05	1.59818
594	Positive	0.806	186.968	Unknown	[M+H]+	null	null	null	null	20.534	1.19e-05	1.76205
595	Positive	10.828	356.377	Unknown	[M+H]+	null	null	null	null	0.14706	1.19e-05	1.54782
596	Positive	12.085	263.26	Unknown	[M+H]+	null	null	null	null	0.21867	1.19e-05	1.40694
597	Positive	17.466	780.613	Unknown	[M+H]+	null	null	null	null	0.17588	1.19e-05	1.75141
598	Positive	18.283	604.567	Unknown	[M+H]+	null	null	null	null	0.16849	1.2e-05	1.79642
599	Positive	17.51	648.599	low score: Solanesol_major	[M+NH4]+	C45H74O	Polyprenols	AFPLNGZPBSKHHQ-MEGGAXOGSA-N	CC(C)=CCCC(C)=CCCC(C)=CCCC(C)=CCCC(C)=CCCC(C)=CCCC(C)=CCCC(C)=CCCC(C)=CCO	0.17668	1.2e-05	1.81714
600	Positive	8.957	460.313	Unknown	[M+H]+	null	null	null	null	0.25664	1.2e-05	1.41452
601	Positive	0.51	324.241	low score: Melophlin B/C/G/K/L/N/O	[M+H]+	C19H33NO3	N-alkylpyrrolidines	WBPPODSRZVXVJK-MSUUIHNZSA-N	CCCCCCCCCCCC/C(O)=C(C1=O)\C(C(N1C)C)=O	0.24676	1.21e-05	1.79553
602	Positive	9.65	560.364	low score: NCGC00381175-01!3-hydroxy-2-[[3-[3-(3-hydroxy-6-methylheptanoyl)oxy-6-methylheptanoyl]oxy-8-methylnonanoyl]amino]propanoic acid	[M+H]+	C29H53NO9	N-acyl-alpha amino acids	MWZPHNZNPKKSEI-UHFFFAOYSA-N	CC(C)CCCCC(CC(=O)NC(CO)C(O)=O)OC(=O)CC(CCC(C)C)OC(=O)CC(O)CCC(C)C	0.1829	1.21e-05	1.75618
603	Positive	1.325	170.169	Unknown	[M+H]+	null	null	null	null	0.18764	1.22e-05	1.88501
604	Positive	8.49	502.314	no MS2: Serine conjugated chenodeoxycholic acid	[M+Na]+	C27H45NO6	Glycinated bile acids and derivatives	MIGXYHMLYVAUQT-DYUDRYMLSA-N	C[C@H](CCC(N[C@@H](CO)C(O)=O)=O)[C@H]1CC[C@@]2([H])[C@]3([H])[C@H](O)C[C@]4([H])C[C@H](O)CC[C@]4(C)[C@H]3CC[C@@]21C	22.578	1.22e-05	1.82635
605	Positive	6.102	316.235	low score: NCGC00380344-01!(2E,4E)-N-[2-(4-hydroxyphenyl)ethyl]dodeca-2,4-dienamide [IIN-based: Match]	[M+H]+	C20H29NO2	1-hydroxy-2-unsubstituted benzenoids	VVRNYAJXAUQHEN-BNFZFUHLSA-N	CCCCCCC\\C=C\\C=C\\C(=O)NCCC1=CC=C(O)C=C1	0.28586	1.23e-05	1.6281
606	Positive	0.708	314.849	Unknown	[M+H]+	null	null	null	null	99.537	1.24e-05	2.04543
607	Positive	0.427	234.903	Unknown	[M+H]+	null	null	null	null	76.391	1.24e-05	1.80537
608	Positive	6.446	331.196	low score: Carnosol	[M+H]+	C20H26O4	Diterpene lactones	XUSYGBPHQBWGAD-PJSUUKDQSA-N	O=C1OC2C3=CC(=C(O)C(O)=C3C14CCCC(C)(C)C4C2)C(C)C	5.0426	1.24e-05	1.51045
609	Positive	1.031	434.93	Unknown	[M+H]+	null	null	null	null	0.27037	1.24e-05	1.5936
610	Positive	13.084	464.408	Unknown	[M+H]+	null	null	null	null	0.19979	1.25e-05	2.03357
611	Positive	13.787	735.639	Unknown	[M+H]+	null	null	null	null	0.16427	1.25e-05	1.32085
612	Positive	0.427	352.849	Unknown	[M+H]+	null	null	null	null	63.706	1.26e-05	1.94584
613	Positive	17.769	360.352	Unknown	[M+H]+	null	null	null	null	0.18098	1.26e-05	1.73702
614	Positive	16.551	758.626	Unknown	[M+H]+	null	null	null	null	0.14835	1.27e-05	1.92885
615	Positive	13.758	312.387	Unknown	[M+H]+	null	null	null	null	0.21494	1.28e-05	1.7559
616	Positive	8.223	506.37	Unknown	[M+H]+	null	null	null	null	0.28371	1.28e-05	1.46959
617	Positive	0.638	120.976	Unknown	[M+H]+	null	null	null	null	12.435	1.3e-05	1.31129
618	Positive	0.515	314.85	Unknown	[M+H]+	null	null	null	null	79.573	1.3e-05	2.0061
619	Positive	15.518	341.336	low score: docosanoic acid	[M+H]+	C22H44O2	Very long-chain fatty acids	UKMSUNONTOPOIO-UHFFFAOYSA-N	O=C(O)CCCCCCCCCCCCCCCCCCCCC	0.18069	1.3e-05	1.7646
620	Negative	19.756	162.833	Unknown	[M-H]-	null	null	null	null	0.39019	1.31e-05	1.74833
621	Positive	0.357	255.172	low score: 4-Methylbenzylidene camphor	[M+H]+	C18H22O	Bicyclic monoterpenoids	HEOCBCNFKCOKBX-UHFFFAOYSA-N	CC1=CC=C(C=C2C3CCC(C)(C2=O)C3(C)C)C=C1	2.9151	1.32e-05	1.52862
622	Positive	0.704	192.935	Unknown	[M+H]+	null	null	null	null	52.714	1.34e-05	1.94605
623	Positive	0.419	318.872	Unknown	[M+H]+	null	null	null	null	32.748	1.34e-05	1.70665
624	Positive	0.363	122.104	2,6-Xylidine	[M+H]+	C8H11N	m-Xylenes	UFFBMTHBGFGIHF-UHFFFAOYSA-N	Cc1cccc(c1N)C	9.2174	1.35e-05	1.77401
625	Positive	13.352	348.343	Unknown	[M+H]+	null	null	null	null	0.18577	1.35e-05	1.83993
626	Positive	0.432	298.877	Unknown	[M+H]+	null	null	null	null	55.17	1.35e-05	1.5329
627	Positive	9.169	300.32	Unknown	[M+H]+	null	null	null	null	0.18701	1.36e-05	1.49079
628	Negative	19.756	201.793	Unknown	[M-H]-	null	null	null	null	0.37273	1.36e-05	1.60674
629	Positive	10.859	524.418	Unknown	[M+H]+	null	null	null	null	0.18338	1.37e-05	1.73498
630	Positive	9.402	350.352	Unknown	[M+H]+	null	null	null	null	0.25319	1.38e-05	1.86323
631	Positive	7.359	387.218	low score: Sufentanil	[M+H]+	C22H30N2O2S	Anilides	GGCSSNBKKAUURC-UHFFFAOYSA-N	[H]C([H])([H])OC([H])([H])C(N(C(=O)C([H])([H])C([H])([H])[H])c(c([H])3)c([H])c([H])c([H])c([H])3)(C([H])([H])1)C([H])([H])C([H])([H])N(C([H])([H])C([H])([H])c(s2)c([H])c([H])c([H])2)C([H])([H])1	0.20024	1.4e-05	1.96958
632	Positive	0.754	106.999	Unknown	[M+H]+	null	null	null	null	33.578	1.41e-05	1.77928
633	Positive	17.517	620.564	Unknown	[M+H]+	null	null	null	null	0.18791	1.41e-05	1.99385
634	Positive	11.332	325.267	low score: NCGC00180676-03_C20H36O3_1-Naphthalenepentanoic acid, decahydro-2-hydroxy-beta,2,5,5,8a-pentamethyl-, (betaS,1R,2R,8aS)-	[M+H]+	C20H36O3	Diterpenoids	KHCCSRVJJDOANA-ZOSGAXDSSA-N	C[C@@H](CC[C@H]1[C@](C)(O)CCC2C(C)(C)CCC[C@]12C)CC(O)=O	0.16189	1.41e-05	1.52922
635	Positive	17.516	312.357	Unknown	[M+H]+	null	null	null	null	0.24082	1.41e-05	1.62641
636	Positive	0.455	294.884	Unknown	[M+H]+	null	null	null	null	13.606	1.41e-05	1.63819
637	Positive	0.747	156.982	Unknown	[M+H]+	null	null	null	null	3.1115	1.41e-05	1.36322
638	Positive	12.461	397.409	Unknown	[M+H]+	null	null	null	null	0.18277	1.41e-05	1.75012
639	Positive	1.04	222.925	Unknown	[M+H]+	null	null	null	null	0.20728	1.41e-05	1.68047
640	Positive	0.919	147.124	LYSINE	[M+H]+	C6H14N2O2	D-alpha-amino acids	KDXKERNSBIXSRK-YFKPBYRVSA-N	C(CCN)C[C@@H](C(=O)O)N	4.2942	1.41e-05	1.38886
641	Positive	1.542	503.373	Unknown	[M+H]+	null	null	null	null	0.18951	1.42e-05	1.76986
642	Positive	0.665	280.187	low score: Tramadol N-Oxide	[M+H]+	C16H25NO3	Anisoles	HBXKSXMNNGHBEA-UHFFFAOYSA-N	COC1=CC=CC(=C1)C1(O)CCCCC1C[N+](C)(C)[O-]	0.34565	1.42e-05	1.46028
643	Positive	10.579	401.241	low score: Pinoxaden	[M+ACN+H]+	C23H32N2O4	Phenylpyrazoles	MGOHCFMYLBAPRN-UHFFFAOYSA-N	CC(C)(C)C(=O)O/C2=C(/C(=O)N1CCOCCN12)c3c(CC)cc(C)cc3CC	0.28168	1.42e-05	1.48216
644	Positive	13.351	421.289	low score: (1S,4S,5R,9S,10R,13R,14R)-14-hydroxy-5,9-dimethyl-14-{[(3-methylbutanoyl)oxy]methyl}tetracyclo[11.2.1.0?,??.0?,?]hexadecane-5-carboxylic acid	[M+H]+	C25H40O5	Kaurane diterpenoids	FIOZUJXSEZUYCS-MTSAZYMTSA-N	O=C(OCC1(O)CC23CCC4C(C(=O)O)(C)CCCC4(C)C3CCC1C2)CC(C)C	0.20719	1.42e-05	1.76341
645	Positive	10.865	850.602	Unknown	[M+H]+	null	null	null	null	0.18067	1.42e-05	1.75105
646	Positive	16.359	388.371	Unknown	[M+H]+	null	null	null	null	0.22266	1.43e-05	1.98829
647	Positive	11.219	572.425	Unknown	[M+H]+	null	null	null	null	0.19501	1.43e-05	1.52189
648	Positive	15.518	359.349	Unknown	[M+H]+	null	null	null	null	0.18423	1.44e-05	1.83455
649	Positive	0.334	492.443	Unknown	[M+H]+	null	null	null	null	0.19348	1.44e-05	1.66821
650	Positive	9.255	480.342	low score: Serine conjugated chenodeoxycholic acid	[M+H]+	C27H45NO6	Glycinated bile acids and derivatives	MIGXYHMLYVAUQT-DYUDRYMLSA-N	C[C@H](CCC(N[C@@H](CO)C(O)=O)=O)[C@H]1CC[C@@]2([H])[C@]3([H])[C@H](O)C[C@]4([H])C[C@H](O)CC[C@]4(C)[C@H]3CC[C@@]21C	19.748	1.46e-05	1.71168
651	Positive	9.553	570.4	low score: "(4R)-4-((3R,5S,7R,9S,10S,13R,14S,17R)-3,7-dihydroxy-10,13-dimethylhexadecahydro-1H-cyclopenta[a]phenanthren-17-yl)-N-methyl-N-((2S,3R,4R,5R)-2,3,4,5,6-pentahydroxyhexyl)pentanamide"	[M+H]+	C31H55NO8	Dihydroxy bile acids, alcohols and derivatives	KUXSAFRZQPYINU-SGWAQUIASA-N	C[C@H](CCC(N(C)C[C@H](O)[C@@H](O)[C@@H]([C@@H](CO)O)O)=O)[C@H]1CC[C@H]2[C@]3([H])[C@H](O)C[C@@H]4C[C@H](O)CC[C@]4(C)[C@H]3CC[C@@]21C	0.12853	1.46e-05	1.42738
652	Positive	1.036	424.909	Unknown	[M+H]+	null	null	null	null	0.25425	1.47e-05	1.60169
653	Positive	0.743	116.98	Unknown	[M+H]+	null	null	null	null	10.953	1.48e-05	1.75166
654	Positive	12.664	239.254	Unknown	[M+H]+	null	null	null	null	12.731	1.48e-05	1.6636
655	Positive	2.105	305.296	Unknown	[M+H]+	null	null	null	null	0.26878	1.48e-05	1.61636
656	Positive	9.346	598.482	Unknown	[M+H]+	null	null	null	null	0.18676	1.49e-05	1.52619
657	Positive	9.4	588.279	Unknown	[M+H]+	null	null	null	null	166.54	1.49e-05	1.68616
658	Positive	8.746	826.046	Unknown	[M+H]+	null	null	null	null	0.18584	1.49e-05	1.64461
659	Positive	12.501	753.513	Unknown	[M+H]+	null	null	null	null	16.863	1.5e-05	1.28639
660	Positive	11.806	332.311	low score: phenylethylamide 331	[M+H]+	C22H37NO	N-acyl amines	ANKKFXJHCGAFIY-UHFFFAOYSA-N	O=C(CCCCCCCCCCCCC)NCCC1=CC=CC=C1	0.17869	1.5e-05	1.61471
661	Positive	9.011	771.026	Unknown	[M+H]+	null	null	null	null	10.097	1.5e-05	1.74697
662	Positive	0.62	116.986	Unknown	[M+H]+	null	null	null	null	22.189	1.51e-05	1.79775
663	Positive	1.022	448.957	Unknown	[M+H]+	null	null	null	null	0.19474	1.51e-05	1.44729
664	Positive	0.741	337.87	Unknown	[M+H]+	null	null	null	null	11.457	1.52e-05	1.69675
665	Positive	8.631	460.311	Unknown	[M+H]+	null	null	null	null	0.15996	1.53e-05	1.7097
666	Positive	0.2	698.558	Unknown	[M+H]+	null	null	null	null	0.13701	1.54e-05	1.70527
667	Positive	8.129	413.955	Unknown	[M+H]+	null	null	null	null	0.17052	1.56e-05	1.72351
668	Positive	0.765	285.845	Unknown	[M+H]+	null	null	null	null	77.6	1.57e-05	1.9212
669	Positive	10.879	402.389	Unknown	[M+H]+	null	null	null	null	0.194	1.57e-05	1.91478
670	Positive	17.774	321.344	Unknown	[M+H]+	null	null	null	null	0.21117	1.57e-05	1.55879
671	Negative	19.751	199.798	Unknown	[M-H]-	null	null	null	null	0.40249	1.57e-05	1.58377
672	Positive	8.911	301.167	low score: adrenosterone	[M+H]+	C19H24O3	Androgens and derivatives	RZRPTBIGEANTGU-IRIMSJTPSA-N	O=C1C=C2CCC3C(C(=O)CC4(C(=O)CCC34)C)C2(C)CC1	0.41512	1.58e-05	1.41565
673	Positive	6.681	427.305	low score: Leupeptin	[M+H]+	C20H38N6O4	Dipeptides	GDBQQVLCIARPGH-IKGGRYGDSA-N	NC(=N)NCCCC(C=O)NC(=O)C(CC(C)C)NC(=O)C(CC(C)C)NC(C)=O	0.25474	1.58e-05	1.41824
674	Positive	0.344	309.225	low score: h_88_stanozolol_4b_oh	[M-2H2O+H]+	C21H32N2O2	Estrane steroids	OCUSYXNRARMJHS-JQPLYGKBSA-N	C[C@](O)(CC1)[C@@]2(C)[C@@H]1[C@H](CC[C@@H]3[C@]4(C)CC5=CNN=C5C3O)[C@@H]4CC2	3.4546	1.58e-05	1.49018
675	Positive	6.546	449.268	low score: Mappain	[M+2Na-H]+	C29H36O4	Stilbenes	GJZKDVGLDGLPMB-ZVBRSKEYSA-N	OC=1C=C(C=CC2=CC(O)=C(C(O)=C2)CC=C(C)C)C=C(C1O)CC=C(C)CCC=C(C)C	4.8501	1.58e-05	1.33074
676	Positive	6.296	122.972	Unknown	[M+H]+	null	null	null	null	30.879	1.59e-05	1.80805
677	Positive	0.51	316.847	Unknown	[M+H]+	null	null	null	null	39.436	1.59e-05	1.81641
678	Positive	0.728	117.943	Unknown	[M+H]+	null	null	null	null	38.826	1.6e-05	1.84312
679	Positive	17.769	675.735	Unknown	[M+H]+	null	null	null	null	0.13925	1.6e-05	1.72621
680	Positive	11.277	353.3	Unknown	[M+H]+	null	null	null	null	0.19584	1.62e-05	1.5983
681	Positive	14.395	431.416	Unknown	[M+H]+	null	null	null	null	0.20923	1.63e-05	1.93347
682	Positive	14.538	828.627	Unknown	[M+H]+	null	null	null	null	0.21398	1.63e-05	1.52525
683	Positive	15.256	579.484	Unknown	[M+H]+	null	null	null	null	0.16728	1.64e-05	1.29568
684	Positive	13.789	339.323	Unknown	[M+H]+	null	null	null	null	0.18092	1.64e-05	1.73147
685	Positive	1.7	133.935	Unknown	[M+H]+	null	null	null	null	60.967	1.64e-05	1.79092
686	Positive	8.12	460.309	Unknown	[M+H]+	null	null	null	null	0.16729	1.64e-05	1.82315
687	Positive	0.427	500.789	Unknown	[M+H]+	null	null	null	null	15.836	1.65e-05	1.71924
688	Positive	15.518	376.378	Unknown	[M+H]+	null	null	null	null	0.18904	1.66e-05	1.79703
689	Positive	12.471	410.404	Unknown	[M+H]+	null	null	null	null	0.21009	1.66e-05	1.69363
690	Positive	16.71	329.271	low score: 2,4-dihydroxyheptadec-16-enyl acetate	[M+H]+	C19H36O4	Long-chain fatty alcohols	NLBYRERHXBTBBR-UHFFFAOYSA-N	O=C(OCC(O)CC(O)CCCCCCCCCCCC=C)C	0.20142	1.66e-05	1.62202
691	Positive	6.515	375.224	low score: 6a_Methylprednisolone	[M+H]+	C22H30O5	21-hydroxysteroids	VHRSUDSXCMQTMA-UHFFFAOYSA-N	[H]OC([H])([H])C(=O)C(O[H])(C([H])([H])4)C(C([H])([H])[H])(C([H])([H])3)C([H])(C([H])([H])4)C([H])(C([H])([H])1)C([H])(C([H])(O[H])3)C(C([H])=2)(C([H])([H])[H])C(=C([H])C(=O)C([H])2)C([H])(C([H])([H])[H])1	8.2464	1.72e-05	1.37369
692	Positive	10.574	360.213	low score: Unknown (carbon number 16); PlaSMA ID-2012	[M+NH4]+	C16H29N3O6	Unknown	null	null	0.21086	1.73e-05	1.69308
693	Positive	14.963	406.358	Unknown	[M+H]+	null	null	null	null	0.20395	1.73e-05	2.00881
694	Positive	9.661	544.377	Unknown	[M+H]+	null	null	null	null	0.22045	1.73e-05	1.7173
695	Positive	8.118	846.518	Unknown	[M+H]+	null	null	null	null	0.058214	1.73e-05	1.55265
696	Positive	1.81	102.021	Unknown	[M+H]+	null	null	null	null	10.247	1.74e-05	1.84158
697	Positive	1.142	153.139	Unknown	[M+H]+	null	null	null	null	0.36003	1.75e-05	1.70968
698	Positive	0.652	422.853	Unknown	[M+H]+	null	null	null	null	4.4231	1.76e-05	1.72404
699	Positive	8.129	503.357	low score: Glutamine chenodeoxycholic acid	[M-H2O+H]+	C29H48N2O6	Glycinated bile acids and derivatives	WKNSSWRPDRZCAQ-VVJLALRJSA-N	C[C@H](CCC(N[C@@H](CCC(N)=O)C(O)=O)=O)[C@H]1CC[C@@]2([H])[C@]3([H])[C@H](O)C[C@]4([H])C[C@H](O)CC[C@]4(C)[C@H]3CC[C@@]21C	0.18159	1.76e-05	1.74116
700	Positive	0.468	290.847	Unknown	[M+H]+	null	null	null	null	27.258	1.76e-05	1.84406
701	Positive	7.521	290.291	Unknown	[M+H]+	null	null	null	null	0.27847	1.76e-05	1.85703
702	Negative	19.761	164.83	Unknown	[M-H]-	null	null	null	null	0.37523	1.76e-05	1.51347
703	Positive	9.958	708.552	Unknown	[M+H]+	null	null	null	null	0.17084	1.78e-05	1.48422
704	Positive	11.628	427.333	low score: "methyl (6R,E)-2-methyl-6-((3R,5S,7R,9S,10S,12S,13R,14S,17R)-3,7,12-trihydroxy-10,13-dimethylhexadecahydro-1H-cyclopenta[a]phenanthren-17-yl)hept-2-enoate"	[M-2H2O+H]+	C28H46O5	Trihydroxy bile acids, alcohols and derivatives	SZDHRKMCESZUCV-WKGGVHHNSA-N	[H][C@@]12[C@H](O)C[C@@H]3C[C@H](O)CC[C@]3(C)[C@H]1C[C@H](O)[C@@]4(C)[C@H]2CC[C@@H]4[C@@H](CC/C=C(C)/C(OC)=O)C	14.933	1.78e-05	1.62516
705	Positive	0.646	224.899	Unknown	[M+H]+	null	null	null	null	41.273	1.78e-05	1.82614
706	Positive	0.668	412.861	Unknown	[M+H]+	null	null	null	null	12.852	1.79e-05	1.59236
707	Positive	0.432	102.963	Unknown	[M+H]+	null	null	null	null	16.004	1.81e-05	1.49441
708	Positive	15.519	734.714	Unknown	[M+H]+	null	null	null	null	0.15362	1.81e-05	1.4238
709	Positive	13.504	379.275	low score: MAG	[M+Na]+	C21H40O4	1-monoacylglycerols	RZRNAYUHWVFMIP-KTKRTIGZSA-N	CCCCCCCC/C=C\CCCCCCCC(=O)OCC(CO)O	0.21496	1.82e-05	2.02752
710	Negative	0.083	155.859	Unknown	[M-H]-	null	null	null	null	0.32003	1.82e-05	1.62975
711	Positive	0.428	292.868	Unknown	[M+H]+	null	null	null	null	78.764	1.83e-05	1.89941
712	Positive	14.539	810.668	Unknown	[M+H]+	null	null	null	null	0.18562	1.83e-05	1.55159
713	Positive	0.569	223.079	no MS2: 2-methylanthra-9,10-quinone	[M+H]+	C15H10O2	Anthraquinones	NJWGQARXZDRHCD-UHFFFAOYSA-N	O=C1C=2C=CC=CC2C(=O)C3=CC(=CC=C13)C	4.5059	1.85e-05	1.78687
714	Positive	13.349	683.606	Unknown	[M+H]+	null	null	null	null	0.19273	1.85e-05	1.77933
715	Positive	10.486	314.051	no MS2: Isazofos	[M+H]+	C9H17ClN3O3PS	Aryl thiophosphates	XRHGWAGWAHHFLF-UHFFFAOYSA-N	CCOP(=S)(OCC)OC1=NN(C(C)C)C(Cl)=N1	34.609	1.86e-05	1.76259
716	Positive	8.12	473.306	low score: NCGC00347850-02_C26H42O6_2-(4a-Methyl-8-methylenedecahydro-2-naphthalenyl)-2-propanyl 6-deoxy-2-O-[(2E)-2-methyl-2-butenoyl]hexopyranoside	[M+Na]+	C26H42O6	Eudesmane, isoeudesmane or cycloeudesmane sesquiterpenoids	QKRNXYDUTFTSBG-NVNXTCNLSA-N	C\C=C(\C)C(=O)OC1C(O)C(O)C(C)OC1OC(C)(C)C2CCC3(C)CCCC(=C)C3C2	0.18932	1.87e-05	1.89076
717	Positive	13.026	456.328	low score: glycolithocholic acid	[M+Na]+	C26H43NO4	Glycinated bile acids and derivatives	XBSQTYHEGZTYJE-REPOFGKESA-N	C[C@H](CCC(=O)NCC(=O)O)[C@H]1CC[C@@H]2[C@@]1(CC[C@H]3[C@H]2CC[C@H]4[C@@]3(CC[C@H](C4)O)C)C	0.20735	1.89e-05	1.95795
718	Positive	6.355	223.079	no MS2: 2-methylanthra-9,10-quinone	[M+H]+	C15H10O2	Anthraquinones	NJWGQARXZDRHCD-UHFFFAOYSA-N	O=C1C=2C=CC=CC2C(=O)C3=CC(=CC=C13)C	4.0492	1.91e-05	1.76067
719	Positive	14.248	638.554	Unknown	[M+H]+	null	null	null	null	0.16231	1.94e-05	1.72401
720	Positive	14.38	451.243	no MS2: Ingenol-3,4-5,20-diacetonide	[M+Na]+	C26H36O5	Ketals	JOKBBQPBIIZMJV-JQFFUGKZSA-N	O=C1C2C=C3COC(OC3C45OC(OC5C(=CC14C(C)CC6C2C6(C)C)C)(C)C)(C)C	34.337	1.94e-05	1.55697
721	Positive	8.116	432.275	low score: NCGC00381130-01!methyl (2E,8E)-9-[3a-hydroxy-6,7-dimethyl-1-(2-methylpropyl)-3-oxo-2,4,7,7a-tetrahydro-1H-isoindol-4-yl]-4,5-dihydroxy-8-methylnona-2,8-dienoate [IIN-based on: CCMSLIB00000846918]	[M-H2O+H]+	C25H39NO6	Bicyclic monoterpenoids	YUXUTEAAGHFKKH-MKQCFFQWSA-N	COC(=O)\\C=C\\C(O)C(O)CC\\C(C)=C\\C1C=C(C)C(C)C2C(CC(C)C)NC(=O)C12O	0.14416	1.94e-05	1.79056
722	Positive	14.545	832.655	Unknown	[M+H]+	null	null	null	null	0.23267	1.95e-05	1.82332
723	Positive	11.928	300.31	Unknown	[M+H]+	null	null	null	null	0.15936	1.98e-05	1.78075
724	Positive	13.507	250.106	low score: Goniothalenol	[M+NH4]+	C13H12O4	Furopyrans	ZKIRVBNLJKGIEM-UHFFFAOYSA-N	O=C1OC2C(OC(C=3C=CC=CC3)C2O)C=C1	0.20863	1.98e-05	1.86923
725	Positive	9.493	301.168	low score: adrenosterone	[M+H]+	C19H24O3	Androgens and derivatives	RZRPTBIGEANTGU-IRIMSJTPSA-N	O=C1C=C2CCC3C(C(=O)CC4(C(=O)CCC34)C)C2(C)CC1	0.39766	2e-05	1.42655
726	Positive	0.724	286.852	Unknown	[M+H]+	null	null	null	null	191.41	2.02e-05	1.92972
727	Positive	6.301	460.306	Unknown	[M+H]+	null	null	null	null	2.8817	2.03e-05	1.71764
728	Positive	0.67	379.814	Unknown	[M+H]+	null	null	null	null	76.551	2.04e-05	1.79382
729	Positive	1.021	244.978	Unknown	[M+H]+	null	null	null	null	0.1966	2.05e-05	1.78338
730	Positive	8.732	934.62	Unknown	[M+H]+	null	null	null	null	0.16239	2.05e-05	1.42412
731	Positive	11.412	510.436	Unknown	[M+H]+	null	null	null	null	0.21184	2.06e-05	1.72093
732	Positive	10.222	623.368	low score: legonoxamine G	[M+H]+	C30H50N6O8	Phenylacetamides	CPTJLYZGQRBEKO-UHFFFAOYSA-N	O=C(CC1=CC=CC=C1)N(O)CCCCCNC(CCC(N(O)CCCCCNC(CCC(N(O)CCCCN)=O)=O)=O)=O	22.081	2.08e-05	1.39406
733	Positive	6.337	324.242	Unknown	[M+H]+	null	null	null	null	0.28408	2.08e-05	1.59078
734	Positive	0.428	430.779	Unknown	[M+H]+	null	null	null	null	47.135	2.09e-05	1.8942
735	Positive	10.062	482.359	Unknown	[M+H]+	null	null	null	null	21.229	2.11e-05	1.59863
736	Positive	14.302	439.287	low score: (2E,4E,6E,8E,10E,12E,14E,16E)-2,6,11,15-tetramethyl-17-(2,6,6-trimethyl-1-cyclohexen-1-yl)-2,4,6,8,10,12,14,16-heptadecaoctaenal	[M+Na]+	C30H40O	Triterpenoids	DFMMVLFMMAQXHZ-DOKBYWHISA-N	O=CC(=CC=CC(=CC=CC=C(C=CC=C(C=CC1=C(C)CCCC1(C)C)C)C)C)C	24.155	2.11e-05	1.62451
737	Positive	0.173	604.435	Unknown	[M+H]+	null	null	null	null	0.052392	2.11e-05	1.33225
738	Positive	13.352	239.259	Unknown	[M+H]+	null	null	null	null	0.19907	2.13e-05	1.61436
739	Positive	10.492	606.33	low score: NCGC00386085-01_C32H44O10_	[M+NH4]+	C32H44O10	Oxepanes	MPCIDUFOTGXABA-UHFFFAOYSA-N	CC1OC\23C/4=C(/C(O)C5C(C)(CCC6OC(CC(OC(C)=O)C56C)C(C)(C)O)O4)C(=O)\C=C2C(C)C(OC(C)=O)C13C	44.668	2.16e-05	1.80878
740	Positive	1.074	496.883	Unknown	[M+H]+	null	null	null	null	0.26922	2.2e-05	1.33645
741	Positive	0.509	228.896	Unknown	[M+H]+	null	null	null	null	29.706	2.2e-05	1.17181
742	Positive	0.428	298.899	Unknown	[M+H]+	null	null	null	null	13.481	2.21e-05	1.60061
743	Positive	0.483	288.856	Unknown	[M+H]+	null	null	null	null	106.41	2.23e-05	1.96072
744	Positive	0.648	196.903	Unknown	[M+H]+	null	null	null	null	23.503	2.23e-05	1.81391
745	Positive	11.246	502.349	low score: (2R,3S,4S,5S,6R)-2-[[7-hydroxy-4-[(Z)-5-hydroxy-3-methylpent-3-enyl]-4a,8,8-trimethyl-3-methylidene-2,4,5,6,7,8a-hexahydro-1H-naphthalen-2-yl]oxy]-6-(hydroxymethyl)oxane-3,4,5-triol	[M+NH4]+	C26H44O8	Diterpene glycosides	JECOCDKQCZSANH-RFKAOMIISA-N	OCC=C(C)CCC1C(=C)C(OC2OC(CO)C(O)C(O)C2O)CC3C(C)(C)C(O)CCC13C	12.886	2.23e-05	1.49646
746	Positive	0.763	208.959	Unknown	[M+H]+	null	null	null	null	52.482	2.23e-05	1.89424
747	Positive	0.062	121.073	no MS2: Urea	[2M+H]+	CH4N2O	Ureas	XSQUKJJJFZCRTK-UHFFFAOYSA-N	NC(N)=O	4.3031	2.26e-05	1.72025
748	Positive	18.312	576.534	Unknown	[M+H]+	null	null	null	null	0.20175	2.26e-05	1.85374
749	Positive	0.502	137.973	Unknown	[M+H]+	null	null	null	null	3.4086	2.28e-05	1.80226
750	Positive	13.478	655.545	Unknown	[M+H]+	null	null	null	null	0.15106	2.3e-05	1.48294
751	Positive	1.091	954.729	Unknown	[M+H]+	null	null	null	null	4.2675	2.3e-05	1.19151
752	Positive	14.421	782.666	Unknown	[M+H]+	null	null	null	null	0.25574	2.32e-05	1.47225
753	Positive	0.089	465.41	no MS2: hyperin	[M+H]+	C21H20O12	Flavonoid-3-O-glycosides	OVSQVDMCBVZWGM-DTGCRPNFSA-N	O=C1C(OC2OC(CO)C(O)C(O)C2O)=C(OC=3C=C(O)C=C(O)C13)C=4C=CC(O)=C(O)C4	0.22999	2.33e-05	1.94287
754	Positive	8.463	504.327	low score: glutamate conjugated chenodeoxycholic acid	[M-H2O+H]+	C29H47NO7	Glycinated bile acids and derivatives	MHOZNCAVRHAOKT-PYDJSGOHSA-N	O=C(O)CCC(N=C(O)CCC(C)C1CCC2C3C(O)CC4CC(O)CCC4(C)C3CCC12C)C(=O)O	4.1539	2.35e-05	1.3957
755	Positive	0.85	287.242	low score: NCGC00180707-03_C20H32O2_1(4H)-Naphthalenone, 4a,5,6,7,8,8a-hexahydro-4-[(3R)-3-hydroxy-3-methyl-4-penten-1-yl]-3,4a,8,8-tetramethyl-, (4S,4aR,8aS)-	[M-H2O+H]+	C20H32O2	Diterpenoids	SGKBPTZDIUXCMW-LWCVALJOSA-N	C\C1=C\C(=O)[C@H]2C(C)(C)CCC[C@]2(C)[C@H]1CC[C@@](C)(O)C=C	0.26017	2.35e-05	1.96611
756	Positive	7.36	445.274	low score: Lovastatin hydroxy acid observed in lovastatin standard	[M+Na]+	C24H38O6	Medium-chain hydroxy acids and derivatives	QLJODMDSTUBWDW-BXMDZJJMSA-N	CCC(C)C(=O)OC1CC(C=C2C1C(C(C=C2)C)CCC(CC(CC(=O)O)O)O)C	0.22314	2.35e-05	1.89773
757	Positive	9.109	301.168	low score: 1-[4,5-bis(hydroxymethyl)-3-methoxy-2-methylphenoxy]-3-methylbutane-2,3-diol	[M+H]+	C15H24O6	Benzyl alcohols	MAQMWSUGBCIGLJ-UHFFFAOYSA-N	OCC1=CC(OCC(O)C(O)(C)C)=C(C(OC)=C1CO)C	0.40964	2.35e-05	1.49111
758	Positive	13.678	554.217	low score: 7-methoxy-4-(9,10,12,13-tetramethoxy-3-methyl-4,5-dihydro-3H-phenanthro[1,2-d]azepin-2-yl)-2H-chromen-2-one	[M+H]+	C33H31NO7	Phenanthrenes and derivatives	WRJSPKBWGMBBSI-UHFFFAOYSA-N	O=C1OC=2C=C(OC)C=CC2C(=C1)C3=CC=4C(OC)=C(OC)C5=C(C=CC=6C=C(OC)C(OC)=CC65)C4CCN3C	23.683	2.36e-05	1.53791
759	Positive	0.636	122.972	Unknown	[M+H]+	null	null	null	null	243.33	2.36e-05	1.82731
760	Positive	7.521	230.265	Unknown	[M+H]+	null	null	null	null	0.20215	2.36e-05	1.82437
761	Positive	9.686	522.392	Unknown	[M+H]+	null	null	null	null	0.22049	2.36e-05	1.57604
762	Positive	8.123	488.34	Unknown	[M+H]+	null	null	null	null	0.1851	2.36e-05	1.67386
763	Positive	7.969	219.063	low score: Hydroxytyrosol Acetate	[M+Na]+	C10H12O4	Tyrosols and derivatives	FGJGLFPNIZXRLV-UHFFFAOYSA-N	O=C(OCCC1=CC=C(O)C(O)=C1)C	41.479	2.36e-05	1.67837
764	Positive	15.087	359.35	Unknown	[M+H]+	null	null	null	null	0.22253	2.37e-05	1.98482
765	Positive	0.522	295.878	Unknown	[M+H]+	null	null	null	null	8.1568	2.37e-05	1.60653
766	Positive	15.126	623.506	Unknown	[M+H]+	null	null	null	null	0.15843	2.38e-05	1.72292
767	Positive	9.185	588.272	Unknown	[M+H]+	null	null	null	null	44.539	2.38e-05	1.65043
768	Positive	12.464	239.24	Unknown	[M+H]+	null	null	null	null	8.7727	2.41e-05	1.63342
769	Positive	8.415	453.205	low score: Fluocinolone acetonide	[M+K]+	C24H30F2O6	21-hydroxysteroids	FEBLZLNTKCEFIT-VSXGLTOVSA-N	CC1(C)O[C@@H]2C[C@H]3[C@@H]4C[C@H](F)C5=CC(=O)C=C[C@]5(C)[C@@]4(F)[C@@H](O)C[C@]3(C)[C@@]2(O1)C(=O)CO	0.12392	2.44e-05	1.42814
770	Positive	0.559	233.871	Unknown	[M+H]+	null	null	null	null	40.849	2.45e-05	1.82567
771	Positive	14.091	157.093	no MS2: SUBERATE	[M-H2O+H]+	C8H14O4	Medium-chain fatty acids	TYFQFVWCELRYAO-UHFFFAOYSA-N	OC(=O)CCCCCCC(O)=O	6.2017	2.52e-05	1.73669
772	Positive	0.742	389.845	Unknown	[M+H]+	null	null	null	null	12.175	2.52e-05	1.61899
773	Positive	0.435	249.961	Unknown	[M+H]+	null	null	null	null	29.175	2.52e-05	1.53464
774	Positive	11.972	530.394	Unknown	[M+H]+	null	null	null	null	0.16199	2.53e-05	1.64053
775	Positive	8.118	415.248	low score: NCGC00385486-01_C25H34O5_2-Butenoic acid, 2-methyl-, (2R,3R,5R)-2,6,6,9-tetramethyl-11-oxotricyclo[5.4.0.0~2,8~]undec-9-ene-3,5-diyl ester, (2Z,2'Z)-	[M+H]+	C25H34O5	Bicyclic monoterpenoids	GXMVUJPIUWLNDG-MJJXSLNDSA-N	C\C=C(C)/C(=O)O[C@@H]1C[C@@H](OC(=O)\C(C)=C/C)[C@]2(C)C\3C(C2C(=O)\C=C3C)C1(C)C	0.16297	2.54e-05	1.76653
776	Positive	9.032	497.237	Unknown	[M+H]+	null	null	null	null	7.6607	2.55e-05	1.59225
777	Positive	0.464	255.855	Unknown	[M+H]+	null	null	null	null	98.256	2.56e-05	1.69153
778	Positive	12.512	411.257	low score: "(R)-4-((5S,8S,9S,10R,13R,14S,17R)-10,13-dimethyl-3,6-dioxohexadecahydro-1H-cyclopenta[a]phenanthren-17-yl)pentanoic acid"	[M+Na]+	C24H36O4	Bile acids, alcohols and derivatives	AWINBLVINXVKTE-DLKBGQMWSA-N	C[C@@H]([C@H]1CC[C@]2([H])[C@]1(C)CC[C@@]3([H])[C@@]2([H])CC([C@]4([H])[C@]3(C)CCC(C4)=O)=O)CCC(O)=O	10.104	2.57e-05	1.52038
779	Positive	13.624	628.416	Unknown	[M+H]+	null	null	null	null	9.0814	2.6e-05	1.27656
780	Negative	19.734	160.835	Unknown	[M-H]-	null	null	null	null	0.42732	2.61e-05	1.7393
781	Positive	10.047	620.494	Unknown	[M+H]+	null	null	null	null	0.20787	2.63e-05	1.55825
782	Positive	0.681	130.016	Unknown	[M+H]+	null	null	null	null	27.402	2.64e-05	1.76263
783	Positive	9.583	603.331	low score: (1S,2S,5R,7R,10S,11S,14R,16R,19S,20S,23R,25R)-5,14-diethyl-2,11,20,23-tetramethyl-4,13,22,28,29,30-hexaoxatetracyclo[23.2.1.1?,??.1??,??]triacontane-3,12,21-trione	[M+H-2H2O]+	C32H52O9	Macrolides and analogues	MXZXIBZNZUOHER-VHWZNAHMSA-N	O=C1OC(C)CC2OC(CC2)C(C(=O)OC(CC)CC3OC(CC3)C(C(=O)OC(CC)CC4OC(CC4)C1C)C)C	10.309	2.66e-05	1.61244
784	Positive	13.016	420.243	low score: Phytosphingosine-1-P	[M+Na]+	C18H40NO6P	Phosphosphingolipids	AYGOSKULTISFCW-KZNAEPCWSA-N	CCCCCCCCCCCCCC[C@H]([C@@H]([C@@H](COP(=O)(O)O)N)O)O	0.20509	2.67e-05	1.85559
785	Positive	17.824	490.47	Unknown	[M+H]+	null	null	null	null	0.21921	2.69e-05	1.61757
786	Positive	6.44	444.275	no MS2: Nakijiquinone B	[M+H]+	C26H37NO5	Valine and derivatives	HREPKYSNTPRGQR-UHFFFAOYSA-N	CC(C(NC(C(C(CC1(C)C(C)CCC2(C)C(C)=CCCC21)=C3O)=O)=CC3=O)C(O)=O)C	2.2057	2.71e-05	1.24523
787	Positive	19.736	776.299	low score: methyl (2S,3R,4S)-3-ethenyl-4-[(Z)-3-[(2S,3R,4R)-3-ethenyl-5-methoxycarbonyl-2-[(2S,3R,4S,5S,6R)-3,4,5-trihydroxy-6-(hydroxymethyl)oxan-2-yl]oxy-3,4-dihydro-2H-pyran-4-yl]-4-oxobut-2-enyl]-2-[(2S,3R,4S,5S,6R)-3,4,5-trihydroxy-6-(hydroxymethyl)oxan-2-yl]oxy-3,4-dihydro-2H-pyran-5-carboxylate	[M+NH4]+	C34H46O19	Terpene glycosides	MWLKXILGJPSPKZ-LWSBBEHMSA-N	O=CC(=CCC1C(=COC(OC2OC(CO)C(O)C(O)C2O)C1C=C)C(=O)OC)C3C(=COC(OC4OC(CO)C(O)C(O)C4O)C3C=C)C(=O)OC	0.18589	2.71e-05	1.33632
788	Positive	6.446	347.253	low score: (3S)-5-[(1R,2R,8aS)-2-hydroxy-2,5,5,8a-tetramethyl-3,4,4a,6,7,8-hexahydro-1H-naphthalen-1-yl]-3-methylpentanoic acid	[M+Na]+	C20H36O3	Diterpenoids	KHCCSRVJJDOANA-ZOSGAXDSSA-N	O=C(O)CC(C)CCC1C(O)(C)CCC2C(C)(C)CCCC12C	0.22002	2.73e-05	1.27845
789	Positive	0.425	238.9	Unknown	[M+H]+	null	null	null	null	17.846	2.73e-05	1.63165
790	Positive	1.276	513.852	Unknown	[M+H]+	null	null	null	null	0.20842	2.73e-05	1.55493
791	Positive	7.802	281.159	low score: (5R)-trans-1,7-diphenyl-5-hydroxy-6-hepten-3-one	[M+H]+	C19H20O2	Linear diarylheptanoids	NEQGOKAKPXXESR-YLZCUGDYSA-N	O=C(CCC=1C=CC=CC1)CC(O)C=CC=2C=CC=CC2	7.6581	2.73e-05	1.48677
792	Positive	8.541	346.364	Unknown	[M+H]+	null	null	null	null	0.22535	2.73e-05	1.77026
793	Positive	0.427	291.867	Unknown	[M+H]+	null	null	null	null	22.458	2.75e-05	1.62096
794	Positive	6.394	212.134	low score: Mescaline	[M+H]+	C11H17NO3	Phenethylamines	RHCSKNNOAZULRK-UHFFFAOYSA-N	COC1=CC(=CC(=C1OC)OC)CCN	9.3713	2.75e-05	1.61536
795	Positive	9.461	280.187	low score: Tramadol N-Oxide	[M+H]+	C16H25NO3	Anisoles	HBXKSXMNNGHBEA-UHFFFAOYSA-N	COC1=CC=CC(=C1)C1(O)CCCCC1C[N+](C)(C)[O-]	0.412	2.75e-05	1.38417
796	Positive	14.553	786.672	Unknown	[M+H]+	null	null	null	null	0.16434	2.75e-05	1.5069
797	Positive	7.315	226.199	Unknown	[M+H]+	null	null	null	null	0.3797	2.81e-05	1.36544
798	Positive	13.479	325.235	low score: GLYCEROL-MYRISTATE	[M+Na]+	C17H34O4	1-monoacylglycerols	DCBSHORRWZKAKO-UHFFFAOYSA-N	CCCCCCCCCCCCCC(=O)OCC(CO)O	0.22089	2.83e-05	1.92831
799	Positive	1.045	286.969	Unknown	[M+H]+	null	null	null	null	6.6461	2.86e-05	1.46185
800	Positive	1.399	513.857	Unknown	[M+H]+	null	null	null	null	0.22015	2.89e-05	1.70379
801	Positive	1.172	302.224	low score: Unknown (carbon number 14); PlaSMA ID-1564	[M+H]+	C14H27N3O4	Unknown	null	null	0.21208	2.89e-05	1.22512
802	Positive	6.35	325.212	low score: Abietic acid	[M+Na]+	C20H30O2	Diterpenoids	RSWGJHLUYNHPMX-UHFFFAOYSA-N	O=C(O)C1(C)CCCC2(C)C3C(C=C(CC3)C(C)C)=CCC12	2.4607	2.89e-05	1.47493
803	Positive	0.479	182.973	Unknown	[M+H]+	null	null	null	null	4.7818	2.92e-05	1.81942
804	Positive	0.426	121.975	Unknown	[M+H]+	null	null	null	null	16.02	2.93e-05	1.50365
805	Positive	0.426	114.965	Unknown	[M+H]+	null	null	null	null	76.133	2.93e-05	1.47453
806	Positive	10.006	664.518	Unknown	[M+H]+	null	null	null	null	0.18917	2.93e-05	1.54681
807	Positive	9.246	755.055	Unknown	[M+H]+	null	null	null	null	0.19379	2.93e-05	1.81251
808	Positive	1.037	314.21	no MS2: Heliotrine	[M+H]+	C16H27NO5	Alkaloids and derivatives	LMFKRLGHEKVMNT-UJDVCPFMSA-N	CC(C)C(C(C)OC)(C(=O)OCC1=CCN2C1C(CC2)O)O	0.22251	2.93e-05	1.32921
809	Positive	7.865	220.152	low score: (4S,5Z,6S)-4-(2-methoxy-2-oxoethyl)-5-[2-[(E)-3-phenylprop-2-enoyl]oxyethylidene]-6-[(2S,3R,4S,5S,6R)-3,4,5-trihydroxy-6-(hydroxymethyl)oxan-2-yl]oxy-4H-pyran-3-carboxylic acid	[M+NH4]+	C10H18O4	Oxolanes	IVOODSRSVJPWLY-UHFFFAOYSA-N	O=C(O)C(C)C1OC(CC1)CC(O)C	0.23315	2.93e-05	1.63765
810	Positive	0.263	136.03	no MS2: 2-Benzoxazolinone; CE0; ASSKVPFEZFQQNQ-UHFFFAOYSA-N	[M+H]+	C7H5NO2	Benzoxazolones	ASSKVPFEZFQQNQ-UHFFFAOYSA-N	c1ccc2c(c1)nc(O)o2	2.8565	2.94e-05	1.69015
811	Positive	1.748	193.945	Unknown	[M+H]+	null	null	null	null	13.049	2.94e-05	1.62468
812	Positive	6.411	498.847	Unknown	[M+H]+	null	null	null	null	0.22162	2.94e-05	1.75054
813	Positive	0.809	149.953	Unknown	[M+H]+	null	null	null	null	21.403	2.94e-05	1.77333
814	Positive	1.702	172.968	Unknown	[M+H]+	null	null	null	null	34.288	2.95e-05	1.72252
815	Positive	1.086	203.171	no MS2: NCGC00381391-01_C11H22O3_1-(2-Hydroxyethyl)-2,2,6-trimethyl-1,4-cyclohexanediol	[M+H]+	C11H22O3	Cyclohexanols	QXUANCZURDYUIT-UHFFFAOYSA-N	CC1CC(O)CC(C)(C)C1(O)CCO	0.3651	2.95e-05	1.5551
816	Negative	12.111	253.206	Unknown	[M-H]-	null	null	null	null	2.9284	2.95e-05	1.41713
817	Positive	9.103	522.378	low score: (1S,4aR,6aS,6bR,9R,10R,11R,12aR,14bS)-1,10,11-trihydroxy-9-(hydroxymethyl)-2,2,6a,6b,9,12a-hexamethyl-1,3,4,5,6,6a,7,8,8a,10,11,12,13,14b-tetradecahydropicene-4a-carboxylic acid_major	[M+NH4]+	C30H48O6	Triterpenoids	IFIQVSCCFRXSJV-ZIZFEDMCSA-N	CC1(C)CCC2(C(=O)O)CCC3(C)C(=CCC4C5(C)CC(O)C(O)C(C)(CO)C5CCC43C)C2C1O	31.751	2.97e-05	1.84233
818	Positive	0.757	236.85	Unknown	[M+H]+	null	null	null	null	36.724	2.97e-05	1.68589
819	Positive	0.429	220.883	Unknown	[M+H]+	null	null	null	null	131.78	3.02e-05	1.70534
820	Positive	17.773	396.43	Unknown	[M+H]+	null	null	null	null	0.21588	3.02e-05	1.67619
821	Positive	0.45	176.964	Unknown	[M+H]+	null	null	null	null	73.836	3.03e-05	1.78949
822	Positive	9.663	496.384	no MS2: 1-O-hexadecyl-2-C-methyl-3-phosphatidylcholine	[M+H]+	C25H54NO6P	Glycerophosphocholines	BZLKOORCGCYQJZ-UHFFFAOYSA-N	CCCCCCCCCCCCCCCCOCC(C)(COP(=O)([O-])OCC[N+](C)(C)C)O	0.23333	3.06e-05	1.44658
823	Positive	14.91	804.62	Unknown	[M+H]+	null	null	null	null	0.18691	3.06e-05	1.68173
824	Positive	0.064	806.625	Unknown	[M+H]+	null	null	null	null	0.23388	3.06e-05	1.69139
825	Positive	8.025	421.348	Unknown	[M+H]+	null	null	null	null	0.23645	3.07e-05	1.96955
826	Positive	14.064	698.561	Unknown	[M+H]+	null	null	null	null	0.1298	3.07e-05	1.64421
827	Positive	0.45	101.948	Unknown	[M+H]+	null	null	null	null	7.6886	3.13e-05	1.36497
828	Positive	13.554	531.321	low score: Kukoamine A	[M+H]+	C28H42N4O6	Catechols	IOLDDENZPBFBHV-UHFFFAOYSA-N	O=C(NCCCNCCCCNCCCNC(=O)CCC1=CC=C(O)C(O)=C1)CCC2=CC=C(O)C(O)=C2	0.15224	3.15e-05	1.47173
829	Positive	12.507	683.594	Unknown	[M+H]+	null	null	null	null	186.42	3.18e-05	1.63256
830	Positive	8.754	588.276	Unknown	[M+H]+	null	null	null	null	11.291	3.2e-05	1.54863
831	Positive	11.623	422.377	Unknown	[M+H]+	null	null	null	null	3.8373	3.21e-05	1.27868
832	Positive	12.045	463.164	low score: Methylnissolin-3-O-glucoside	[M+H]+	C23H26O10	Pterocarpans	PCIXSTFFMHVOMF-UHFFFAOYSA-N	OCC1OC(OC2=CC=C3C(OCC4C5=CC=C(OC)C(OC)=C5OC34)=C2)C(O)C(O)C1O	7.1523	3.23e-05	1.35846
833	Positive	8.558	523.516	Unknown	[M+H]+	null	null	null	null	9.9564	3.28e-05	1.43753
834	Positive	0.502	279.851	Unknown	[M+H]+	null	null	null	null	16.583	3.28e-05	1.7388
835	Positive	8.995	499.514	Unknown	[M+H]+	null	null	null	null	5.8303	3.28e-05	1.40522
836	Positive	13.021	403.317	low score: "(3R,7R,8R,9S,10S,12S,13R,14S,17R)-17-((2R,5R)-5,7-dihydroxyheptan-2-yl)-10,13-dimethylhexadecahydro-1H-cyclopenta[a]phenanthrene-3,7,12-triol"	[M-2H2O+H]+	C26H46O5	Tetrahydroxy bile acids, alcohols and derivatives	PBXYLMVLLSYZLN-LQHTUWPVSA-N	O[C@@H](C1)CC[C@@]2(C)C1([H])C[C@@H](O)[C@]3([H])[C@]2([H])C[C@H](O)[C@@]4(C)[C@@]3([H])CC[C@@]4([C@H](C)CC[C@@H](O)CCO)[H]	0.20085	3.29e-05	1.62648
837	Positive	11.253	428.412	Unknown	[M+H]+	null	null	null	null	0.23711	3.29e-05	1.89078
838	Positive	8.707	415.25	low score: NCGC00385486-01_C25H34O5_2-Butenoic acid, 2-methyl-, (2R,3R,5R)-2,6,6,9-tetramethyl-11-oxotricyclo[5.4.0.0~2,8~]undec-9-ene-3,5-diyl ester, (2Z,2'Z)-	[M+H]+	C25H34O5	Bicyclic monoterpenoids	GXMVUJPIUWLNDG-MJJXSLNDSA-N	C\C=C(C)/C(=O)O[C@@H]1C[C@@H](OC(=O)\C(C)=C/C)[C@]2(C)C\3C(C2C(=O)\C=C3C)C1(C)C	0.18447	3.3e-05	1.70255
839	Positive	0.776	158.975	Unknown	[M+H]+	null	null	null	null	89.93	3.3e-05	1.31928
840	Positive	11.971	523.295	low score: 5,15-Diacetyl-3-benzoyllathyrol	[M+H]+	C31H38O7	Diterpenoids	JPYYWXPAHJBKJX-PTKUAVCHSA-N	O=C(OC1C(C)CC2(OC(=O)C)C(=O)C(=CC3C(CCC(=C)C(OC(=O)C)C12)C3(C)C)C)C=4C=CC=CC4	0.15704	3.3e-05	1.53726
841	Positive	10.338	400.379	Unknown	[M+H]+	null	null	null	null	0.17714	3.33e-05	1.52946
842	Negative	7.042	651.175	Unknown	[M-H]-	null	null	null	null	0.095583	3.34e-05	1.39399
843	Positive	2.09	324.245	no MS2: Melophlin B/C/G/K/L/N/O	[M+H]+	C19H33NO3	N-alkylpyrrolidines	WBPPODSRZVXVJK-MSUUIHNZSA-N	CCCCCCCCCCCC/C(O)=C(C1=O)\C(C(N1C)C)=O	0.28848	3.37e-05	1.4865
844	Positive	13.648	444.412	no MS2: (1R,3aR,5aR,5bR,9S,11aR)-3a,5a,5b,8,8,11a-hexamethyl-1-prop-1-en-2-yl-1,2,3,4,5,6,7,7a,9,10,11,11b,12,13,13a,13b-hexadecahydrocyclopenta[a]chrysen-9-ol	[M+NH4]+	C30H50O	Triterpenoids	MQYXUWHLBZFQQO-KIIHVYTKSA-N	OC1CCC2(C)C(CCC3(C)C2CCC4C5C(C(=C)C)CCC5(C)CCC43C)C1(C)C	2.4402	3.38e-05	1.12668
845	Positive	0.65	369.083	low score: ethyl 3-(2,3-dihydrobenzo[b][1,4]dioxin-6-yl)-7-hydroxy-4-oxo-4H-chromene-2-carboxylate	[M+H]+	C20H16O7	Isoflavones	NTNSKOKPJWYQGX-UHFFFAOYSA-N	O=C(OCC)C=1OC2=CC(O)=CC=C2C(=O)C1C=3C=CC=4OCCOC4C3	55.658	3.4e-05	1.76259
846	Positive	13.162	578.469	Unknown	[M+H]+	null	null	null	null	0.23141	3.4e-05	1.79863
847	Positive	1.048	884.745	no MS2: Triacylglycerol 17:1-18:2-18:2	[M+NH4]+	C56H98O6	Triacylglycerols	QYLNHIFWNMHHOK-JBQLTYABSA-N	C(OC(=O)CCC=CCC=CCCCCCCCCCC)(COC(=O)CCC=CCC=CCCCCCCCCCC)COC(CCC=CCCCCCCCCCCCC)=O	7.5584	3.4e-05	1.43492
848	Positive	1.016	240.985	low score: Thiram	[M+H]+	C6H12N2S4	Thiuram disulfides	KUAZQDVKQLNFPE-UHFFFAOYSA-N	CN(C)C(=S)SSC(=S)N(C)C	0.29858	3.41e-05	1.46665
849	Positive	1.709	131.939	Unknown	[M+H]+	null	null	null	null	119	3.43e-05	1.7689
850	Positive	12.599	171.109	no MS2: Levetiracetam	[M+H]+	C8H14N2O2	Alpha amino acids and derivatives	HPHUVLMMVZITSG-LURJTMIESA-N	O=C1N(CCC1)C(C(=N)O)CC	13.685	3.44e-05	1.90589
851	Positive	9.16	454.334	low score: Peimine	[M+Na]+	C27H45NO3	Cerveratrum-type alkaloids	IUKLSMSEHKDIIP-BZMYINFQSA-N	OC1CCC2(C)C(C1)C(O)CC3C4CCC5C(CN6CC(C)CCC6C5(O)C)C4CC32	0.27467	3.45e-05	1.52389
852	Positive	9.268	534.345	low score: Orlistat	[M+K]+	C29H53NO5	Leucine and derivatives	AHLBNYSZXLDEJQ-FWEHEUNISA-N	CCCCCCCCCCC[C@H](OC([C@@H](NC=O)CC(C)C)=O)C[C@H]1[C@H](CCCCCC)C(O1)=O	0.25632	3.52e-05	1.70718
853	Positive	0.462	174.969	Unknown	[M+H]+	null	null	null	null	66.25	3.55e-05	1.71584
854	Positive	0.734	241.903	Unknown	[M+H]+	null	null	null	null	40.431	3.56e-05	1.86907
855	Positive	1.002	269.028	no MS2: Visnagin	[M+K]+	C13H10O4	Furanochromones	NZVQLVGOZRELTG-UHFFFAOYSA-N	O=C1C=C(OC=2C=C3OC=CC3=C(OC)C12)C	0.22016	3.57e-05	1.70631
856	Positive	15.384	579.471	Unknown	[M+H]+	null	null	null	null	0.22287	3.58e-05	1.76916
857	Positive	0.657	246.905	Unknown	[M+H]+	null	null	null	null	12.844	3.58e-05	1.77885
858	Positive	0.423	368.822	Unknown	[M+H]+	null	null	null	null	65.909	3.58e-05	1.67118
859	Positive	1.839	133.936	Unknown	[M+H]+	null	null	null	null	59.553	3.6e-05	1.77299
860	Positive	14.37	439.286	low score: Ochrolifuanine A	[M+H]+	C29H34N4	Harmala alkaloids	BYHWAEAVIGYEBJ-QJTMEEEXSA-N	[H][C@](N1CC2)(C[C@@](C[C@@]3([H])NCCC4=C3NC5=C4C=CC=C5)([H])[C@@H](CC)C1)C6=C2C7=C(N6)C=CC=C7	23.754	3.6e-05	1.59659
861	Positive	11.21	550.437	Unknown	[M+H]+	null	null	null	null	0.23736	3.6e-05	1.78818
862	Positive	0.396	148.145	Unknown	[M+H]+	null	null	null	null	0.43436	3.63e-05	1.43203
863	Positive	10.86	631.373	low score: 3-(dimethyl(3-((4R)-4-((3R,7R,12S,17R)-3,7,12-trihydroxy-10,13-dimethylhexadecahydro-1H-cyclopenta[a]phenanthren-17-yl)pentanamido)propyl)ammonio)-2-hydroxypropane-1-sulfonate	[M+H]+	C32H58N2O8S	Trihydroxy bile acids, alcohols and derivatives	GUQQBLRVXOUDTN-AKTHIIOISA-N	O=C(NCCC[N+](C)(C)CC(O)CS(=O)(=O)[O-])CCC(C)C1CCC2C3C(O)CC4CC(O)CCC4(C)C3CC(O)C12C	0.2303	3.63e-05	1.77338
864	Positive	0.459	128.952	Unknown	[M+H]+	null	null	null	null	141.74	3.64e-05	1.61753
865	Positive	15.513	786.667	Unknown	[M+H]+	null	null	null	null	0.15781	3.64e-05	1.52282
866	Positive	10.755	618.308	no MS2: NCGC00385653-01_C36H40O8_	[M+NH4]+	C36H40O8	Jatrophane and cyclojatrophane diterpenoids	IBMKFRJIFFORNR-LAZXBOAMSA-N	CC1CC2(OC(C)=O)C(\C=C(C)/C(CC(=O)C(C)(C)/C=C/C(C)C2=O)OC(=O)C3=CC=CC=C3)C1OC(=O)C4=CC=CC=C4	26.479	3.65e-05	1.67594
867	Positive	1.146	166.086	Phenylalanine	[M+H]+	C9H11NO2	Phenylalanine and derivatives	COLNVLDHVKWLRT-UHFFFAOYSA-N	O=C(O)C(N)CC=1C=CC=CC1	7.1505	3.7e-05	1.41487
868	Positive	6.302	333.175	low score: Isoxaben	[M+H]+	C18H24N2O4	Dimethoxybenzenes	PMHURSZHKKJGBM-UHFFFAOYSA-N	CCC(C)(CC)C1=NOC(=C1)NC(=O)C2=C(C=CC=C2OC)OC	6.5203	3.7e-05	1.56858
869	Positive	19.074	758.624	Unknown	[M+H]+	null	null	null	null	0.23161	3.7e-05	1.92964
870	Positive	9.007	499.185	no MS2: Mundulone Acetate	[M+Na]+	C28H28O7	6-prenylated isoflavanones	QUQMZWZRFQKNFP-UHFFFAOYSA-N	O=C(OC1CC2=CC=3C(=O)C(=COC3C=C2OC1(C)C)C=4C=CC=5OC(C=CC5C4OC)(C)C)C	5.663	3.71e-05	1.30314
871	Positive	8.127	528.343	low score: "2-((4R)-4-((3R,5S,7S,9S,10S,13R,14S,17R)-3,7-dihydroxy-10,13-dimethylhexadecahydro-1H-cyclopenta[a]phenanthren-17-yl)-2,2-dimethylpentanamido)ethane-1-sulfonic acid"	[M+H]+	C28H49NO6S	Taurinated bile acids and derivatives	UXAHTIGXQXJADE-VHDFTFQCSA-N	[H][C@@]12[C@@H](O)C[C@]3([H])C[C@H](O)CC[C@]3(C)[C@H]1CC[C@@]4(C)[C@H]2CC[C@@H]4[C@@H](CCC(NCC(C)(C)S(=O)(O)=O)=O)C	0.22715	3.72e-05	1.52423
872	Positive	1.39	115.967	Unknown	[M+H]+	null	null	null	null	29.16	3.75e-05	1.60508
873	Positive	6.499	122.972	Unknown	[M+H]+	null	null	null	null	23.77	3.75e-05	1.6149
874	Positive	1.807	131.939	Unknown	[M+H]+	null	null	null	null	152.32	3.75e-05	1.7429
875	Positive	6.112	372.258	low score: (2E,4E,12Z)-N-(2-methylpropyl)octadeca-2,4,12-trienamide	[M+K]+	C22H39NO	N-acyl amines	PCWWIOUZYOPZHT-VBUSEHTESA-N	OC(=NCC(C)C)C=CC=CCCCCCCC=CCCCCC	5.1025	3.75e-05	1.87397
876	Positive	7.761	343.326	Unknown	[M+H]+	null	null	null	null	0.29782	3.75e-05	1.30291
877	Positive	0.44	251.954	Unknown	[M+H]+	null	null	null	null	21.014	3.75e-05	1.56256
878	Positive	1.04	808.844	Unknown	[M+H]+	null	null	null	null	4.1717	3.75e-05	1.39316
879	Negative	7.036	634.194	Unknown	[M-H]-	null	null	null	null	0.13932	3.75e-05	1.3889
880	Positive	6.335	504.339	low score: glutamate conjugated chenodeoxycholic acid	[M-H2O+H]+	C29H47NO7	Glycinated bile acids and derivatives	MHOZNCAVRHAOKT-PYDJSGOHSA-N	O=C(O)CCC(N=C(O)CCC(C)C1CCC2C3C(O)CC4CC(O)CCC4(C)C3CCC12C)C(=O)O	2.3507	3.78e-05	1.59048
881	Positive	9.02	572.304	Unknown	[M+H]+	null	null	null	null	9.0993	3.79e-05	1.58731
882	Positive	7.304	473.301	low score: NCGC00347850-02_C26H42O6_2-(4a-Methyl-8-methylenedecahydro-2-naphthalenyl)-2-propanyl 6-deoxy-2-O-[(2E)-2-methyl-2-butenoyl]hexopyranoside	[M+Na]+	C26H42O6	Eudesmane, isoeudesmane or cycloeudesmane sesquiterpenoids	QKRNXYDUTFTSBG-NVNXTCNLSA-N	C\C=C(\C)C(=O)OC1C(O)C(O)C(C)OC1OC(C)(C)C2CCC3(C)CCCC(=C)C3C2	5.0513	3.79e-05	1.24503
883	Positive	12.979	313.298	low score: icosanoic acid	[M+H-H2O]+	C20H40O2	Long-chain fatty acids	VKOBVWXKNCXXDE-UHFFFAOYSA-N	O=C(O)CCCCCCCCCCCCCCCCCCC	0.25201	3.79e-05	1.567
884	Positive	1.011	255.001	no MS2: (4S,5Z,6S)-4-(2-methoxy-2-oxoethyl)-5-[2-[(E)-3-phenylprop-2-enoyl]oxyethylidene]-6-[(2S,3R,4S,5S,6R)-3,4,5-trihydroxy-6-(hydroxymethyl)oxan-2-yl]oxy-4H-pyran-3-carboxylic acid	[M+K]+	C12H8O4	8-methoxypsoralens	QXKHYNVANLEOEG-UHFFFAOYSA-N	O=C1OC2=C(OC)C=3OC=CC3C=C2C=C1	0.22105	3.8e-05	1.72418
885	Positive	0.427	358.796	Unknown	[M+H]+	null	null	null	null	27.679	3.8e-05	1.63271
886	Negative	10.558	201.792	Unknown	[M-H]-	null	null	null	null	0.49589	3.8e-05	1.58853
887	Positive	8.75	412.246	1-Decanoyl-2-hydroxy-sn-glycero-3-phosphocholine	[M]+	C18H39NO7P	1-acyl-sn-glycero-3-phosphocholines	SECPDKKEUKDCPG-QGZVFWFLSA-O	CCCCCCCCCC(=O)OCC(O)COP(O)(=O)OCC[N+1](C)(C)C	0.28732	3.81e-05	1.63306
888	Positive	0.427	216.93	Unknown	[M+H]+	null	null	null	null	12.635	3.83e-05	1.52229
889	Positive	0.207	212.134	low score: Mescaline	[M+H]+	C11H17NO3	Phenethylamines	RHCSKNNOAZULRK-UHFFFAOYSA-N	COC1=CC(=CC(=C1OC)OC)CCN	12.545	3.83e-05	1.63034
890	Positive	15.518	267.292	Unknown	[M+H]+	null	null	null	null	0.21544	3.83e-05	1.47383
891	Positive	13.544	589.38	low score: "(3R,6R)-6-((3R,5R,7R,8R,9S,10S,12S,13R,14S,17R)-3,7-diacetoxy-12-hydroxy-10,13-dimethylhexadecahydro-1H-cyclopenta[a]phenanthren-17-yl)heptane-1,3-diyl diacetate"	[M-H2O+H]+	C34H54O9	Monohydroxy bile acids, alcohols and derivatives	MRBBYYYXCVLILT-VUXPKORVSA-N	C[C@@H]([C@H]1CC[C@]2([H])[C@]1(C)[C@@H](O)C[C@@]3([H])[C@@]2([H])[C@H](OC(C)=O)C[C@]4([H])[C@]3(C)CC[C@@H](OC(C)=O)C4)CC[C@@H](OC(C)=O)CCOC(C)=O	0.18208	3.85e-05	1.57122
892	Positive	6.242	853.285	no MS2: NCGC00381148-01_C34H54O23_6-O-[(2E)-2-Methyl-2-butenoyl]-beta-D-glucopyranosyl-(1->2)-6-O-[(2E)-2-methyl-2-butenoyl]-alpha-D-glucopyranosyl beta-D-glucopyranosyl-(1->2)-alpha-D-glucopyranoside	[M+Na]+	C34H54O23	Saccharolipids	PUIAUUSJWDDCLR-JBJHWARDSA-N	C/C=C(C)/C(=O)OC[C@H]1O[C@@H](O[C@@H]2[C@@H](O)[C@H](O)[C@@H](COC(=O)\C(C)=C\C)O[C@@H]2O[C@H]3O[C@H](CO)[C@@H](O)[C@H](O)[C@H]3O[C@@H]4O[C@H](CO)[C@@H](O)[C@H](O)[C@H]4O)[C@H](O)[C@@H](O)[C@@H]1O	11.074	3.85e-05	1.46541
893	Positive	0.77	195.925	Unknown	[M+H]+	null	null	null	null	17.311	3.87e-05	1.71106
894	Positive	1.173	262.189	no MS2: verruculotoxin	[M+NH4]+	C15H20N2O	Alpha amino acid amides	CUANCTHYEDWUMU-KBPBESRZSA-N	OC1=NC(CC=2C=CC=CC2)CN3CCCCC13	0.29967	3.87e-05	1.35632
895	Positive	14.303	461.271	low score: MMV676602	[M+H]+	C25H32N8O	Phenylpiperazines	RXZMYLDMFYNEIM-UHFFFAOYSA-N	OC(=NC)C1=NN(C=2C=3N=C(N=CC3CC(C12)(C)C)NC4=CC=C(C=C4)N5CCN(C)CC5)C	50.647	3.89e-05	1.64285
896	Positive	8.123	504.335	low score: glutamate conjugated chenodeoxycholic acid	[M-H2O+H]+	C29H47NO7	Glycinated bile acids and derivatives	MHOZNCAVRHAOKT-PYDJSGOHSA-N	O=C(O)CCC(N=C(O)CCC(C)C1CCC2C3C(O)CC4CC(O)CCC4(C)C3CCC12C)C(=O)O	0.19338	3.9e-05	1.73992
897	Positive	14.914	300.315	Unknown	[M+H]+	null	null	null	null	0.22908	3.93e-05	1.79598
898	Positive	6.408	280.186	no MS2: Sibutramine	[M+H]+	C17H26ClN	Chlorobenzenes	UNAANXDKBXWMLN-UHFFFAOYSA-N	ClC1=CC=C(C=C1)C2(CCC2)C(N(C)C)CC(C)C	0.39177	3.94e-05	1.38646
899	Positive	12.522	472.247	no MS2: 11,12-dihydroxy-13-methoxy-4,5,8-trimethyl-3-(2-methylpropyl)-1H,2H,3H,4H,6aH,9H,10H,11H,12H,13H,14H,15H,15bH-cycloundeca[e]isoindole-1,15-dione	[M+K]+	C25H39NO5	Isoindolones	VMCFTVWDHVWSOB-UHFFFAOYSA-N	O=C1CC(OC)C(O)C(O)CCC(=CC2C=C(C)C(C)C3C(N=C(O)C123)CC(C)C)C	23.405	3.96e-05	1.36152
900	Positive	14.307	451.251	low score: Ingenol-3,4-5,20-diacetonide	[M+Na]+	C26H36O5	Ketals	JOKBBQPBIIZMJV-JQFFUGKZSA-N	O=C1C2C=C3COC(OC3C45OC(OC5C(=CC14C(C)CC6C2C6(C)C)C)(C)C)(C)C	16.156	3.98e-05	1.4514
901	Positive	0.448	122.964	Unknown	[M+H]+	null	null	null	null	210.94	3.99e-05	1.47396
902	Positive	0.727	302.822	Unknown	[M+H]+	null	null	null	null	269.45	4.01e-05	1.80682
903	Positive	14.712	431.416	Unknown	[M+H]+	null	null	null	null	0.17663	4.01e-05	1.42252
904	Positive	15.086	341.331	low score: docosanoic acid	[M+H]+	C22H44O2	Very long-chain fatty acids	UKMSUNONTOPOIO-UHFFFAOYSA-N	O=C(O)CCCCCCCCCCCCCCCCCCCCC	0.24648	4.01e-05	1.78185
905	Positive	12.51	435.233	no MS2: Grayanotoxin I_major	[M+Na]+	C22H36O7	Leucothol and grayanotoxane diterpenoids	NXCYBYJXCJWMRY-VGBBEZPXSA-N	CC(=O)OC1C2CCC3C(C)(O)C4CC(O)C(C)(C)C4(O)C(O)CC13CC2(C)O	13.447	4.01e-05	1.25509
906	Positive	9.412	590.272	low score: Benzoylmesaconine	[M+H]+	C31H43NO10	Aconitane-type diterpenoid alkaloids	PULWZCUZNRVAHT-PUAFOYDXSA-N	O=C(OC1C2C3CC1(O)C(OC)C(O)C2(O)C4C(OC)C5C6(COC)CN(C)C4C35C(OC)CC6O)C=7C=CC=CC7	55.665	4.01e-05	1.58448
907	Positive	9.114	223.079	low score: Cystathionine	[M+H]+	C7H14N2O4S	L-cysteine-S-conjugates	ILRYLPWNYFXEMH-WHFBIAKZSA-N	OC(=O)[C@@H](N)CCSC[C@@H](N)C(O)=O	5.4657	4.03e-05	1.76852
908	Positive	1.28	441.827	Unknown	[M+H]+	null	null	null	null	0.22773	4.04e-05	1.7219
909	Positive	16.069	755.623	low score: (2E,6E)-3,7,11,15,19,23,27,31,35-nonamethylhexatriaconta-2,6,34-triene-1,10,11,15,19,23,27,31-octol	[M+H]+	C45H86O8	Polyprenols	MFQDKOXWQXOOAO-YAHSWYSTSA-N	OCC=C(C)CCC=C(C)CCC(O)C(O)(C)CCCC(O)(C)CCCC(O)(C)CCCC(O)(C)CCCC(O)(C)CCCC(O)(C)CCC=C(C)C	0.11979	4.05e-05	1.44125
910	Positive	19.75	780.619	Unknown	[M+H]+	null	null	null	null	0.21552	4.07e-05	1.76803
911	Positive	8.618	548.322	low score: (2S,3R,5S,9R)-2,3-dihydroxy-14-(hydroxymethyl)-5,9-dimethyl-14-{[(2S,3R,4S,5S,6R)-3,4,5-trihydroxy-6-(hydroxymethyl)oxan-2-yl]oxy}tetracyclo[11.2.1.0?,??.0?,?]hexadecane-5-carboxylic acid	[M+Na]+	C26H42O11	Diterpene glycosides	QUCGBWQRLWOVBR-BBJJSLPGSA-N	O=C(O)C1(C)CCCC2(C)C3CCC4CC3(CC4(OC5OC(CO)C(O)C(O)C5O)CO)C(O)C(O)C12	0.27253	4.17e-05	1.51482
912	Positive	0.677	158.014	Unknown	[M+H]+	null	null	null	null	58.166	4.19e-05	1.86401
913	Positive	13.551	548.349	Unknown	[M+H]+	null	null	null	null	0.16042	4.23e-05	1.45236
914	Positive	9.003	534.328	low score: 9-hydroxy-5b,8,11a-trimethyl-1-prop-1-en-2-yl-1,2,3,4,5,6,7,7a,9,10,11,11b,12,13,13a,13b-hexadecahydrocyclopenta[a]chrysene-3a,5a,8-tricarboxylic acid	[M+NH4]+	C30H44O7	Triterpenoids	FTGKHGAVFGGOMW-UHFFFAOYSA-N	O=C(O)C12CCC(C(=C)C)C2C3CCC4C5(C)CCC(O)C(C(=O)O)(C)C5CCC4(C)C3(C(=O)O)CC1	4.9771	4.24e-05	1.30871
915	Positive	0.907	130.095	Pipecolic acid	[M+H]+	C6H11NO2	Alpha amino acids	HXEACLLIILLPRG-UHFFFAOYSA-N	O=C(O)C1NCCCC1	5.6489	4.24e-05	1.5578
916	Positive	0.426	380.85	Unknown	[M+H]+	null	null	null	null	23.577	4.24e-05	1.70898
917	Positive	0.662	335.819	Unknown	[M+H]+	null	null	null	null	24.062	4.24e-05	1.75347
918	Positive	9.662	482.406	Unknown	[M+H]+	null	null	null	null	0.24738	4.24e-05	1.64465
919	Positive	14.403	175.12	no MS2: Gramine	[M+H]+	C11H14N2	3-alkylindoles	OCDGBSUVYYVKQZ-UHFFFAOYSA-N	C=1C=CC2=C(C1)NC=C2CN(C)C	2.3433	4.24e-05	1.46829
920	Positive	12.93	346.307	low score: Macamide B	[M+H]+	C23H39NO	N-acyl amines	MLGPKWUKOQAAGI-UHFFFAOYSA-N	O=C(NCC=1C=CC=CC1)CCCCCCCCCCCCCCC	0.22114	4.24e-05	1.83962
921	Positive	8.784	578.445	low score: NCGC00384949-01!2-(hydroxymethyl)-6-(2,20,21-trihydroxydocosan-3-yloxy)oxane-3,4,5-triol	[M+ACN+H]+	C28H56O9	Fatty acyl glycosides of mono- and disaccharides	IKQSIKPOUMLPKK-UHFFFAOYSA-N	CC(O)C(O)CCCCCCCCCCCCCCCCC(OC1OC(CO)C(O)C(O)C1O)C(C)O	0.2556	4.28e-05	1.59586
922	Positive	0.885	594.802	Unknown	[M+H]+	null	null	null	null	3.5907	4.35e-05	1.21483
923	Positive	11.335	303.283	low score: h_58_bolasterone-m	[M+H-H2O]+	C21H36O2	Androgens and derivatives	ZWQUPIDNCOVROC-HEEAJRSSSA-N	C[C@]1(O)CC[C@@H]2[C@]1(C)CC[C@H]3[C@H]2[C@H](C)C[C@@]4([H])[C@]3(C)CC[C@@H](O)C4	0.19091	4.37e-05	1.39496
924	Positive	0.432	141.995	Unknown	[M+H]+	null	null	null	null	35.332	4.42e-05	1.55658
925	Positive	9.962	374.398	Unknown	[M+H]+	null	null	null	null	0.24234	4.42e-05	1.75588
926	Positive	0.43	290.872	Unknown	[M+H]+	null	null	null	null	67.64	4.42e-05	1.83367
927	Positive	11.964	441.281	Unknown	[M+H]+	null	null	null	null	0.19925	4.42e-05	1.61677
928	Positive	10.494	606.352	Unknown	[M+H]+	null	null	null	null	31.138	4.43e-05	1.77593
929	Positive	0.207	122.096	no MS2: 2,6-Xylidine	[M+H]+	C8H11N	m-Xylenes	UFFBMTHBGFGIHF-UHFFFAOYSA-N	CC1=CC=CC(C)=C1N	11.604	4.47e-05	1.09126
930	Positive	0.428	316.874	Unknown	[M+H]+	null	null	null	null	27.688	4.48e-05	1.50239
931	Positive	10.243	598.44	Unknown	[M+H]+	null	null	null	null	0.23005	4.5e-05	1.67509
932	Positive	1.051	690.797	Unknown	[M+H]+	null	null	null	null	8.6538	4.51e-05	1.48094
933	Positive	11.795	538.436	Unknown	[M+H]+	null	null	null	null	0.24326	4.52e-05	1.75976
934	Positive	7.182	301.167	low score: 1-[4,5-bis(hydroxymethyl)-3-methoxy-2-methylphenoxy]-3-methylbutane-2,3-diol	[M+2Na-H]+	C15H24O6	Benzyl alcohols	MAQMWSUGBCIGLJ-UHFFFAOYSA-N	OCC1=CC(OCC(O)C(O)(C)C)=C(C(OC)=C1CO)C	0.43812	4.52e-05	1.31096
935	Positive	19.54	824.591	Unknown	[M+H]+	null	null	null	null	0.22314	4.52e-05	1.90884
936	Positive	10.128	532.433	Unknown	[M+H]+	null	null	null	null	0.23888	4.56e-05	1.44134
937	Positive	9.662	518.368	Unknown	[M+H]+	null	null	null	null	0.27003	4.56e-05	1.74618
938	Positive	0.437	260.907	Unknown	[M+H]+	null	null	null	null	21.332	4.57e-05	1.40611
939	Positive	6.382	131.94	Unknown	[M+H]+	null	null	null	null	102.08	4.62e-05	1.81034
940	Positive	11.859	402.421	Unknown	[M+H]+	null	null	null	null	0.24107	4.62e-05	1.62789
941	Positive	0.615	138.977	Unknown	[M+H]+	null	null	null	null	4.4243	4.62e-05	1.51733
942	Positive	0.748	128.96	Unknown	[M+H]+	null	null	null	null	99.395	4.65e-05	1.81034
943	Positive	17.744	449.37	low score: (5aR,5bR)-3a,5a,5b,8,8,11a-hexamethyl-1-(prop-1-en-2-yl)icosahydro-1H-cyclopenta[a]chrysen-9-ol	[M+Na]+	C30H50O	Triterpenoids	MQYXUWHLBZFQQO-KZYZTIEESA-N	OC1CCC2(C)C(CCC3(C)C2CCC4C5C(C(=C)C)CCC5(C)CCC43C)C1(C)C	0.24111	4.65e-05	1.87861
944	Negative	0.356	516.927	Unknown	[M-H]-	null	null	null	null	2.5023	4.67e-05	1.20973
945	Positive	15.664	284.316	Unknown	[M+H]+	null	null	null	null	0.22688	4.68e-05	1.79117
946	Positive	1.37	389.623	Unknown	[M+H]+	null	null	null	null	0.23308	4.68e-05	1.71591
947	Positive	14.097	273.186	no MS2: h_92_oxabolone	[M-H2O+H]+	C18H26O3	Estrogens and derivatives	GXHBCWCMYVTJOW-DNBWYCQVSA-N	O[C@H]1CCC2C3CCC4=C(O)C(CCC4C3CC[C@@]21C)=O	6.9536	4.69e-05	1.57637
948	Positive	0.431	261.914	Unknown	[M+H]+	null	null	null	null	12.835	4.69e-05	1.38382
949	Positive	0.428	143.969	Unknown	[M+H]+	null	null	null	null	178.19	4.69e-05	1.50691
950	Positive	0.376	313.218	low score: Guggulsterone E&Z	[M+H]+	C21H28O2	Androgens and derivatives	WDXRGPWQVHZTQJ-AYSLTRBKSA-N	O=C1C=C2CCC3C4CC(=O)C(=CC)C4(C)CCC3C2(C)CC1	9.7049	4.69e-05	1.62904
951	Positive	6.958	301.169	low score: 1-[4,5-bis(hydroxymethyl)-3-methoxy-2-methylphenoxy]-3-methylbutane-2,3-diol	[M+H]+	C15H24O6	Benzyl alcohols	MAQMWSUGBCIGLJ-UHFFFAOYSA-N	OCC1=CC(OCC(O)C(O)(C)C)=C(C(OC)=C1CO)C	0.37957	4.71e-05	1.40113
952	Positive	7.31	318.323	Unknown	[M+H]+	null	null	null	null	0.25083	4.82e-05	1.78839
953	Positive	1.38	221.167	no MS2: Prilocaine	[M+H]+	C13H20N2O	Alpha amino acid amides	MVFGUOIZUNYYSO-UHFFFAOYSA-N	C1=CC=CC(=C1C)NC(C(NCCC)C)=O	2.263	4.83e-05	1.61174
954	Positive	8.538	468.272	low score: "2-((3R)-3-((3R,5S,7S,9S,10S,13R,14S,17R)-3,7-dihydroxy-10,13-dimethylhexadecahydro-1H-cyclopenta[a]phenanthren-17-yl)butanamido)ethane-1-sulfonic acid"	[M-H2O+H]+	C25H43NO6S	Dihydroxy bile acids, alcohols and derivatives	UTTMPNQHQIRCGZ-ZQMFMVRBSA-N	[H][C@@]12[C@@H](O)C[C@]3([H])C[C@H](O)CC[C@]3(C)[C@H]1CC[C@@]4(C)[C@H]2CC[C@@H]4[C@@H](CC(NCCS(=O)(O)=O)=O)C	4.7672	4.83e-05	1.57569
955	Positive	0.428	265.909	Unknown	[M+H]+	null	null	null	null	41.497	4.83e-05	1.63498
956	Positive	0.736	248.053	no MS2: Emtricitabine	[M+H]+	C8H10FN3O3S	3'-thia pyrimidine nucleosides	XQSPYNMVSIKCOC-NTSWFWBYSA-N	FC=1\C(=N/C(=O)N(C=1)[C@H]2O[C@H](SC2)CO)\N	12.692	4.85e-05	1.22959
957	Positive	12.509	190.019	low score: 2-hydroxyacetanilide	[M+K]+	C8H9NO2	Acetanilides	ADVGKWPZRIDURE-UHFFFAOYSA-N	OC=1C=CC=CC1N=C(O)C	27.419	4.89e-05	1.4553
958	Positive	9.348	280.676	Unknown	[M+H]+	null	null	null	null	12.681	4.89e-05	1.48556
959	Positive	1.283	276.14	low score: N-Fructosyl isoleucine	[M-H2O+H]+	C12H23NO7	Isoleucine and derivatives	VYGRYVGDPYFVCA-UHFFFAOYSA-N	O=C(O)C(NCC1(O)(OC(CO)C(O)C1(O)))C(C)CC	6.3783	4.92e-05	1.59101
960	Positive	7.139	264.252	Unknown	[M+H]+	null	null	null	null	59.695	4.93e-05	1.65921
961	Positive	14.635	444.418	low score: (1R,3aR,5aR,5bR,9S,11aR)-3a,5a,5b,8,8,11a-hexamethyl-1-prop-1-en-2-yl-1,2,3,4,5,6,7,7a,9,10,11,11b,12,13,13a,13b-hexadecahydrocyclopenta[a]chrysen-9-ol	[M+NH4]+	C30H50O	Triterpenoids	MQYXUWHLBZFQQO-KIIHVYTKSA-N	OC1CCC2(C)C(CCC3(C)C2CCC4C5C(C(=C)C)CCC5(C)CCC43C)C1(C)C	0.22507	4.93e-05	1.41396
962	Positive	9.76	488.369	low score: 15-formyl-16-hydroxy-1,2,14,17,17-pentamethyl-8-(prop-1-en-2-yl)pentacyclo[11.7.0.0?,??.0?,?.0??,??]icosane-5-carboxylic acid_80.1%	[M+NH4]+	C30H46O4	Triterpenoids	SLWJVQQNDGLXTK-UHFFFAOYSA-N	C=C(C)C1CCC2(C(=O)O)CCC3(C)C(CCC4C5(C)C(C=O)C(O)C(C)(C)C5CCC43C)C12	0.2877	4.95e-05	1.72629
963	Positive	12.519	476.223	low score: 1-(9-hydroxy-2-isopropyl-10-(2,3,4-trimethoxyphenyl)pyrrolo[3',4':6,7]azepino[4,3,2-cd]indol-8(2H,7H,10H)-yl)ethanone	[M+H]+	C27H29N3O5	Benzazepines	QAPJGIXRNRUPRW-UHFFFAOYSA-N	O=C(N1C(O)=C2C(=NC3=CC=CC4=C3C(=CN4C(C)C)C2C5=CC=C(OC)C(OC)=C5OC)C1)C	3.7151	4.95e-05	1.10553
964	Positive	1.968	324.242	Unknown	[M+H]+	null	null	null	null	0.31234	4.96e-05	1.49099
965	Positive	11.97	507.317	low score: (2E,6E,11E,13E)-18-(2,6-dioxopiperidin-4-yl)-9-hydroxy-8-methoxy-10,12,14-trimethyl-15-oxooctadeca-2,6,11,13-tetraenoic acid	[M+NH4]+	C27H39NO7	Lineolic acids and derivatives	SLGMSTJSVRGVPB-BESLVFPPSA-N	O=C(O)C=CCCC=CC(OC)C(O)C(C=C(C=C(C(=O)CCCC1CC(=O)N=C(O)C1)C)C)C	0.17921	5e-05	1.54687
966	Positive	13.784	171.11	no MS2: Levetiracetam	[M+H]+	C8H14N2O2	Alpha amino acids and derivatives	HPHUVLMMVZITSG-LURJTMIESA-N	O=C1N(CCC1)C(C(=N)O)CC	24.036	5.01e-05	1.72396
967	Positive	9.01	586.363	Unknown	[M+H]+	null	null	null	null	0.23321	5.01e-05	1.31309
968	Positive	11.247	543.384	Unknown	[M+H]+	null	null	null	null	54.868	5.04e-05	1.53844
969	Positive	10.684	508.376	Unknown	[M+H]+	null	null	null	null	4.9619	5.13e-05	1.12379
970	Positive	6.242	280.183	no MS2: Sibutramine	[M+H]+	C17H26ClN	Chlorobenzenes	UNAANXDKBXWMLN-UHFFFAOYSA-N	ClC1=CC=C(C=C1)C2(CCC2)C(N(C)C)CC(C)C	0.42377	5.15e-05	1.45641
971	Positive	0.428	306.915	Unknown	[M+H]+	null	null	null	null	11.935	5.16e-05	1.32364
972	Positive	1.034	938.76	Unknown	[M+H]+	null	null	null	null	12.494	5.19e-05	1.43641
973	Positive	12.696	570.498	Unknown	[M+H]+	null	null	null	null	0.3487	5.22e-05	1.74164
974	Positive	0.662	278.82	Unknown	[M+H]+	null	null	null	null	64.061	5.22e-05	1.77341
975	Positive	6.374	400.283	low score: Nakijiquinone O	[M+H]+	C25H37NO3	Prenylquinones	FNCUIBSVSDQFCR-UHFFFAOYSA-N	CC(CNC(C(C(CC1(C)C(C)CCC2(C)C(C)=CCCC21)=C3O)=O)=CC3=O)C	7.0994	5.22e-05	1.60069
976	Positive	0.424	288.215	no MS2: NCGC00380130-01_C15H26O4_1,2-Naphthalenedimethanol, 1,4,4a,5,6,7,8,8a-octahydro-1,4-dihydroxy-5,5,8a-trimethyl-	[M+ACN+H]+	C15H26O4	Tertiary alcohols	HUZKUSWQRONLOJ-UHFFFAOYSA-N	OCC1=CC(O)C2C(C)(C)CCCC2(C)C1(O)CO	2.6756	5.23e-05	1.456
977	Positive	11.106	287.242	low score: NCGC00180707-03_C20H32O2_1(4H)-Naphthalenone, 4a,5,6,7,8,8a-hexahydro-4-[(3R)-3-hydroxy-3-methyl-4-penten-1-yl]-3,4a,8,8-tetramethyl-, (4S,4aR,8aS)-	[M-H2O+H]+	C20H32O2	Diterpenoids	SGKBPTZDIUXCMW-LWCVALJOSA-N	C\C1=C\C(=O)[C@H]2C(C)(C)CCC[C@]2(C)[C@H]1CC[C@@](C)(O)C=C	0.36938	5.24e-05	1.62774
978	Positive	14.51	628.417	Unknown	[M+H]+	null	null	null	null	5.0446	5.25e-05	1.48594
979	Positive	0.427	214.932	Unknown	[M+H]+	null	null	null	null	66.937	5.25e-05	1.7484
980	Positive	9.586	454.331	low score: Peimine	[M+K]+	C27H45NO3	Cerveratrum-type alkaloids	IUKLSMSEHKDIIP-BZMYINFQSA-N	OC1CCC2(C)C(C1)C(O)CC3C4CCC5C(CN6CC(C)CCC6C5(O)C)C4CC32	0.33266	5.25e-05	1.66366
981	Positive	11.25	485.325	low score: NCGC00385760-01!(2S,3S,9R,13R,14S,16R)-2,3,16-trihydroxy-17-[(2R)-2-hydroxy-6-methyl-3-oxohept-6-en-2-yl]-4,4,9,13,14-pentamethyl-1,2,3,7,8,10,12,15,16,17-decahydrocyclopenta[a]phenanthren-11-one [IIN-based on: CCMSLIB00000848112]	[M-H2O+H]+	C30H46O6	Cucurbitacins	JQKLZAQSMGFZSI-NRFHFCOISA-N	CC(=C)CCC(=O)[C@](C)(O)C1[C@H](O)C[C@@]2(C)C3CC=C4C(C[C@H](O)[C@@H](O)C4(C)C)[C@]3(C)C(=O)C[C@]12C	39.985	5.25e-05	1.50821
982	Positive	0.438	208.93	Unknown	[M+H]+	null	null	null	null	26.989	5.25e-05	1.59132
983	Positive	8.022	296.212	Unknown	[M+H]+	null	null	null	null	0.27608	5.25e-05	1.69713
984	Positive	8.298	277.206	Unknown	[M+H]+	null	null	null	null	0.32204	5.25e-05	1.77129
985	Negative	7.818	441.217	low score: methyl 8-hydroxy-4,5,7,10,14,14-hexamethyl-6,17-dioxo-16-oxapentacyclo[13.2.2.0?,??.0?,??.0?,?]nonadeca-3,7-diene-9-carboxylate	[M-H]-	C26H34O6	Naphthopyrans	LISLGICORSJAKO-UHFFFAOYSA-N	O=C(OC)C12C(O)=C(C(=O)C2(C(=CC3C45C(=O)OC(CC4)C(C)(C)C5CCC31C)C)C)C	0.35268	5.25e-05	1.28191
986	Positive	9.257	478.366	low score: "((4R)-4-((3R,5S,7R,9S,10S,13R,14S,17R)-3,7-dihydroxy-10,13-dimethylhexadecahydro-1H-cyclopenta[a]phenanthren-17-yl)-2,2-dimethylpentanoyl)glycine"	[M+H]+	C28H47NO5	Glycinated bile acids and derivatives	HQPHGZUTNNVZLH-BOWXQMHNSA-N	[H][C@@]12[C@@H](O)C[C@@H]3C[C@H](O)CC[C@]3(C)[C@H]1CC[C@@]4(C)[C@H]2CC[C@@H]4[C@@H](CC(C)(C)C(NCC(O)=O)=O)C	0.26863	5.29e-05	1.69384
987	Positive	10.494	618.313	low score: NCGC00385653-01_C36H40O8_	[M+NH4]+	C36H40O8	Jatrophane and cyclojatrophane diterpenoids	IBMKFRJIFFORNR-LAZXBOAMSA-N	CC1CC2(OC(C)=O)C(\C=C(C)/C(CC(=O)C(C)(C)/C=C/C(C)C2=O)OC(=O)C3=CC=CC=C3)C1OC(=O)C4=CC=CC=C4	174.12	5.34e-05	1.67173
988	Positive	0.429	144.991	Unknown	[M+H]+	null	null	null	null	20.623	5.36e-05	1.45324
989	Positive	1.187	148.054	low score: L-Glutamic acid; CE0; WHUUTDBJXJRKMK-VKHMYHEASA-N	[M+H]+	C5H9NO4	Glutamic acid and derivatives	WHUUTDBJXJRKMK-VKHMYHEASA-N	C(CC(=O)O)[C@@H](C(=O)O)N	0.24132	5.36e-05	1.52692
990	Positive	17.761	492.446	Unknown	[M+H]+	null	null	null	null	0.22836	5.36e-05	1.76004
991	Positive	13.934	381.325	Unknown	[M+H]+	null	null	null	null	15.966	5.36e-05	1.59742
992	Positive	0.691	223.08	no MS2: 2-methylanthra-9,10-quinone	[M+H]+	C15H10O2	Anthraquinones	NJWGQARXZDRHCD-UHFFFAOYSA-N	O=C1C=2C=CC=CC2C(=O)C3=CC(=CC=C13)C	3.8458	5.36e-05	1.7183
993	Positive	14.918	832.659	Unknown	[M+H]+	null	null	null	null	0.25253	5.36e-05	1.63972
994	Positive	0.596	241.903	Unknown	[M+H]+	null	null	null	null	67.113	5.4e-05	1.82488
995	Positive	17.947	409.369	low score: cholest-5-en-3-ol	[M+Na]+	C27H46O	Cholesterols and derivatives	HVYWMOMLDIMFJA-RQOOZVDESA-N	OC1CC2=CCC3C(CCC4(C)C(CCC34)C(C)CCCC(C)C)C2(C)CC1	0.20928	5.4e-05	1.61655
996	Positive	0.762	130.975	Unknown	[M+H]+	null	null	null	null	49.151	5.41e-05	1.77264
997	Positive	10.508	525.174	no MS2: Rehmannioside A	[M+H]+	C21H32O15	O-glycosyl compounds	DTNSOISBYQKHCS-PHLAQERCSA-N	OCC1OC(OCC2OC(OC3OC=CC4C(O)C5OC5(CO)C34)C(O)C(O)C2O)C(O)C(O)C1O	7.72	5.41e-05	1.19749
998	Positive	0.099	560.51	no MS2: Ceramide (d18:1/16:0)	[M+Na]+	C34H67NO3	Ceramides	YDNKGFDKKRUKPY-TURZORIXSA-N	CCCCCCCCCCCCCCCC(=O)N[C@@H](CO)[C@@H](/C=C/CCCCCCCCCCCCC)O	0.24365	5.41e-05	1.79376
999	Positive	0.425	250.881	Unknown	[M+H]+	null	null	null	null	292.64	5.42e-05	1.67594
1000	Positive	0.563	278.821	Unknown	[M+H]+	null	null	null	null	48.483	5.42e-05	1.78442
1001	Positive	0.638	300.846	Unknown	[M+H]+	null	null	null	null	40.277	5.42e-05	1.66265
1002	Negative	0.088	153.862	Unknown	[M-H]-	null	null	null	null	0.37153	5.42e-05	1.46741
1003	Positive	8.121	397.237	low score: 4-(3,14-dihydroxy-10,13-dimethylhexadecahydro-1H-cyclopenta[a]phenanthren-17-yl)furan-2(5H)-one	[M+H-H2O]+	C23H34O4	Cardenolides and derivatives	XZTUSOXSLKTKJQ-UHFFFAOYSA-N	O=C1OCC(=C1)C2CCC3(O)C4CCC5CC(O)CCC5(C)C4CCC23C	0.18402	5.45e-05	1.59572
1004	Positive	1.579	422.85	Unknown	[M+H]+	null	null	null	null	11.294	5.47e-05	1.50663
1005	Positive	0.433	115.973	Unknown	[M+H]+	null	null	null	null	186.71	5.52e-05	1.5922
1006	Positive	9.584	621.345	low score: NCGC00381318-01![3-methyl-1-[3-methyl-1-[3-methyl-1-oxo-1-(2,3,4,5,6-pentahydroxyhexoxy)pentan-2-yl]oxy-1-oxopentan-2-yl]oxy-1-oxopentan-2-yl] 2-hydroxy-3-methylpentanoate [IIN-based on: CCMSLIB00000845116]	[M-H2O+H]+	C30H54O14	Depsipeptides	XHFZCGJKWBSHAG-UHFFFAOYSA-N	CCC(C)C(O)C(=O)OC(C(C)CC)C(=O)OC(C(C)CC)C(=O)OC(C(C)CC)C(=O)OCC(O)C(O)C(O)C(O)CO	54.459	5.52e-05	1.64364
1007	Positive	0.734	309.873	Unknown	[M+H]+	null	null	null	null	38.846	5.54e-05	1.67601
1008	Positive	0.708	324.866	Unknown	[M+H]+	null	null	null	null	15.847	5.54e-05	1.56044
1009	Positive	10.504	525.941	Unknown	[M+H]+	null	null	null	null	7.9245	5.56e-05	1.39577
1010	Positive	0.425	362.792	Unknown	[M+H]+	null	null	null	null	70.221	5.56e-05	1.72138
1011	Positive	13.992	455.376	Unknown	[M+H]+	null	null	null	null	0.22301	5.57e-05	1.43298
1012	Positive	0.44	257.851	Unknown	[M+H]+	null	null	null	null	26.899	5.6e-05	1.50567
1013	Positive	0.428	288.874	Unknown	[M+H]+	null	null	null	null	49.163	5.61e-05	1.62278
1014	Positive	14.962	667.536	Unknown	[M+H]+	null	null	null	null	0.2051	5.63e-05	1.30229
1015	Positive	0.154	516.46	Unknown	[M+H]+	null	null	null	null	0.25433	5.63e-05	1.68554
1016	Positive	0.43	117.968	Unknown	[M+H]+	null	null	null	null	70.282	5.64e-05	1.6078
1017	Positive	12.664	313.296	Unknown	[M+H]+	null	null	null	null	94.39	5.72e-05	1.69944
1018	Positive	0.425	293.906	Unknown	[M+H]+	null	null	null	null	30.296	5.72e-05	1.37234
1019	Positive	1.656	243.842	Unknown	[M+H]+	null	null	null	null	24.623	5.73e-05	1.61569
1020	Positive	1.375	655.45	low score: Pseudoginsenoside RT5	[M+H]+	C36H62O10	Triterpene saponins	PSOUXXNNRFNUAY-JLXGCTMESA-N	OCC1OC(OC2CC3(C)C(CC(O)C4C(CCC43C)C5(OC(CC5)C(O)(C)C)C)C6(C)CCC(O)C(C)(C)C26)C(O)C(O)C1O	0.23543	5.74e-05	1.62122
1021	Positive	8.444	642.306	low score: NCGC00347365-02!5-hydroxy-2,2-dimethyl-10-(2-methylbut-3-en-2-yl)pyrano[3,2-g]chromen-8-one [IIN-based on: CCMSLIB00000846817]	[M+H-H2O]+	C19H20O4	Linear pyranocoumarins	WYMMNGQSPNWCIK-UHFFFAOYSA-N	CC(C)(C=C)C1=C2OC(C)(C)C=CC2=C(O)C3=C1OC(=O)C=C3	18.642	5.76e-05	1.38233
1022	Positive	17.896	615.513	Unknown	[M+H]+	null	null	null	null	0.23546	5.84e-05	1.7437
1023	Positive	1.113	950.705	Unknown	[M+H]+	null	null	null	null	4.4704	5.86e-05	1.15852
1024	Positive	19.048	521.418	Unknown	[M+H]+	null	null	null	null	0.26091	5.9e-05	1.77693
1025	Positive	8.99	498.511	Unknown	[M+H]+	null	null	null	null	8.7393	5.94e-05	1.59477
1026	Positive	0.426	230.906	Unknown	[M+H]+	null	null	null	null	148.68	5.94e-05	1.74
1027	Positive	1.039	220.928	Unknown	[M+H]+	null	null	null	null	0.2541	5.95e-05	1.5678
1028	Negative	7.056	599.23	Unknown	[M-H]-	null	null	null	null	0.097719	5.95e-05	1.27214
1029	Positive	0.649	102.02	Unknown	[M+H]+	null	null	null	null	54.098	5.96e-05	1.91009
1030	Positive	0.71	148.943	Unknown	[M+H]+	null	null	null	null	102.65	5.96e-05	1.77808
1031	Positive	0.402	296.098	no MS2: Mebendazole	[M+H]+	C16H13N3O3	Benzophenones	OPXLLQIJSORQAM-UHFFFAOYSA-N	COC(=O)Nc1nc2ccc(cc2[nH]1)C(=O)c1ccccc1	19.19	5.97e-05	1.21672
1032	Positive	1.049	996.727	Unknown	[M+H]+	null	null	null	null	10.6	6e-05	1.29896
1033	Positive	0.085	100.083	no MS2: 2-Piperidone; CE0; XUWHAWMETYGRKB-UHFFFAOYSA-N	[M+H]+	C5H9NO	Piperidinones	XUWHAWMETYGRKB-UHFFFAOYSA-N	C1CCN=C(C1)O	11.77	6.01e-05	1.76078
1034	Positive	0.721	231.873	Unknown	[M+H]+	null	null	null	null	35.973	6.01e-05	1.74937
1035	Positive	6.121	356.218	low score: NCGC00384969-01_C22H31NO4_(5R)-3-({(1S,2R,4aS,6R,8aR)-1,6-Dimethyl-2-[(1E)-1-propen-1-yl]-1,2,4a,5,6,7,8,8a-octahydro-1-naphthalenyl}carbonyl)-4-hydroxy-5-(hydroxymethyl)-1-methyl-1,5-dihydro-2H-pyrrol-2-one	[M-H2O+H]+	C22H31NO4	Pyrrolines	YHKYFYCSTJGMID-JWROMMBDSA-N	C\C=C\[C@@H]1\C=C/[C@@H]2C[C@H](C)CC[C@H]2[C@]1(C)C(=O)/C3=C(O)/[C@@H](CO)N(C)C3=O	3.5685	6.02e-05	1.62904
1036	Positive	8.023	376.286	Unknown	[M+H]+	null	null	null	null	0.26422	6.07e-05	1.84457
1037	Positive	9.286	100.083	N-Methyl-2-pyrrolidone	[M+H]+	C5H9NO	N-alkylpyrrolidines	SECXISVLQFMRJM-UHFFFAOYSA-N	CN1CCCC1=O	18.739	6.12e-05	1.69725
1038	Positive	9.161	573.341	no MS2: 5',6a,8a,9-tetramethyldocosahydrospiro[naphtho[2',1':4,5]indeno[2,1-b]furan-10,2'-pyran]-4-yl 4-methoxybenzoate	[M+Na]+	C35H50O5	Triterpenoids	HSPBTZRUYDLHGR-UHFFFAOYSA-N	O=C(OC1CCC2(C)C(CCC3C2CCC4(C)C3CC5OC6(OCC(C)CC6)C(C)C54)C1)C7=CC=C(OC)C=C7	9.2915	6.12e-05	1.30502
1039	Positive	13.476	780.617	Unknown	[M+H]+	null	null	null	null	0.39089	6.14e-05	1.40141
1040	Positive	8.538	412.236	1-Decanoyl-2-hydroxy-sn-glycero-3-phosphocholine	[M]+	C18H39NO7P	1-acyl-sn-glycero-3-phosphocholines	SECPDKKEUKDCPG-QGZVFWFLSA-O	CCCCCCCCCC(=O)OCC(O)COP(O)(=O)OCC[N+1](C)(C)C	6.5397	6.16e-05	1.56261
1041	Positive	17.77	338.372	Unknown	[M+H]+	null	null	null	null	0.22543	6.16e-05	1.3782
1042	Positive	8.542	520.789	Unknown	[M+H]+	null	null	null	null	10.435	6.16e-05	1.37202
1043	Negative	7.041	626.148	Unknown	[M-H]-	null	null	null	null	0.10677	6.18e-05	1.33504
1044	Positive	9.021	498.202	no MS2: NCGC00169346-02_C23H28O11_Methyl (3R,4R,5R)-3,4-dihydroxy-5-({6-O-[(2E)-3-phenyl-2-propenoyl]-beta-D-glucopyranosyl}oxy)-1-cyclohexene-1-carboxylate	[M+NH4]+	C23H28O11	Fatty acyl glycosides of mono- and disaccharides	DOFMBNVUGRDDTK-NZNOAPCVSA-N	COC(=O)\C1=C\[C@@H](O)[C@@H](O)[C@@H](C1)O[C@@H]2O[C@H](COC(=O)\C=C\C3=CC=CC=C3)[C@@H](O)[C@H](O)[C@H]2O	8.0323	6.2e-05	1.37054
1045	Positive	8.791	627.352	low score: Biselyngbyaside	[M+Na]+	C34H52O9	Macrolides and analogues	QLNOFWPLTFNJPW-NZIIEGKCSA-N	C/C=C/C/C(C)=C\[C@@H](C/C=C/C=C/C[C@H](C)/C=C(C)/[C@@H](OC)C/C=C/[C@@H](O[C@@H]([C@@H]1O)O[C@H](CO)[C@@H](O)[C@@H]1OC)C2)OC2=O	0.25031	6.2e-05	1.692
1046	Positive	0.509	124.963	Unknown	[M+H]+	null	null	null	null	51.227	6.22e-05	1.4485
1047	Positive	16.733	758.624	Unknown	[M+H]+	null	null	null	null	0.22364	6.23e-05	1.91669
1048	Positive	9.592	438.34	low score: tomatidine	[M+Na]+	C27H45NO2	Spirosolanes and derivatives	XYNPYHXGMWJBLV-JYAGXCGRSA-N	OC1CCC2(C)C(CCC3C2CCC4(C)C3CC5OC6(NCC(C)CC6)C(C)C54)C1	0.24461	6.28e-05	1.45544
1049	Positive	8.027	449.39	low score: Taraxasterol	[M+Na]+	C30H50O	Triterpenoids	XWMMEBCFHUKHEX-ZJJHUPNDSA-N	OC1CCC2(C)C(CCC3(C)C2CCC4C5C(C(=C)CCC5(C)CCC43C)C)C1(C)C	0.26197	6.29e-05	1.83434
1050	Positive	14.055	628.416	Unknown	[M+H]+	null	null	null	null	9.5676	6.29e-05	1.53581
1051	Positive	0.447	224.148	low score: Camellimidazole D	[M+H]+	C10H17N5O	2-heteroaryl carboxamides	VTPXABIHFAGVJO-UHFFFAOYSA-N	CN1C2=C(N(CN(CN(C)C2=O)C)C)N=C1	0.37782	6.29e-05	1.32824
1052	Positive	14.54	301.237	low score: Roccellic acid	[M+H]+	C17H32O4	Long-chain fatty acids	CADNMISJDLVPCK-UHFFFAOYSA-N	O=C(O)C(CCCCCCCCCCCC)C(C)C(=O)O	0.23784	6.39e-05	1.74082
1053	Positive	9.66	580.451	Unknown	[M+H]+	null	null	null	null	0.24279	6.39e-05	1.67357
1054	Positive	0.426	370.82	Unknown	[M+H]+	null	null	null	null	88.542	6.48e-05	1.60479
1055	Positive	7.453	253.168	low score: Hexazinone	[M+H]+	C12H20N4O2	Dialkylarylamines	CAWXEEYDBZRFPE-UHFFFAOYSA-N	n1(C2CCCCC2)c(n(c(N(C)C)nc1=O)C)=O	0.27966	6.48e-05	1.5876
1056	Positive	0.378	786.667	Unknown	[M+H]+	null	null	null	null	0.15584	6.48e-05	1.39028
1057	Positive	14.302	358.233	low score: Bullatine G	[M+H]+	C22H31NO3	Napelline-type diterpenoid alkaloids	CBOSLVQFGANWTL-JAQKJRLSSA-N	O=C1CC2C3(CC1C(=C)C3O)C4CC5C6(C)CN(CC)C4C25C(O)CC6	10.045	6.49e-05	1.2696
1058	Positive	14.38	380.138	no MS2: NCGC00384901-01_C24H17N3O2_(7Z)-7-Benzylidene-6-methyl-6,7-dihydroquinazolino[3,2-a][1,4]benzodiazepine-5,13-dione	[M+H]+	C24H17N3O2	Pyrimidodiazepines	HXDZMNFJQNZXKW-QNGOZBTKSA-N	CN1C(=O)C2=C(C=CC=C2)N3C(=O)C4=C(C=CC=C4)/N=C3/C1=C/C5=CC=CC=C5	31.902	6.51e-05	1.34883
1059	Positive	10.487	616.31	low score: Hypaconitine	[M+H]+	C33H45NO10	Aconitane-type diterpenoid alkaloids	FIDOCHXHMJHKRW-ILSCITHTSA-N	O=C(OC1C2C3CC1(O)C(OC)C(O)C2(OC(=O)C)C4C(OC)C5C6(COC)CN(C)C4C35C(OC)CC6)C=7C=CC=CC7	144.01	6.52e-05	1.69389
1060	Positive	1.942	114.093	low score: Unknown (carbon number 6); PlaSMA ID-45	[M+H]+	C6H11NO	Unknown	null	null	6.875	6.57e-05	1.70948
1061	Positive	0.505	306.819	Unknown	[M+H]+	null	null	null	null	269.12	6.6e-05	1.88981
1062	Positive	8.549	612.274	low score: Benzoylmesaconine	[M+Na]+	C31H43NO10	Aconitane-type diterpenoid alkaloids	PULWZCUZNRVAHT-PUAFOYDXSA-N	O=C(OC1C2C3CC1(O)C(OC)C(O)C2(O)C4C(OC)C5C6(COC)CN(C)C4C35C(OC)CC6O)C=7C=CC=CC7	35.796	6.6e-05	1.51227
1063	Positive	7.139	219.191	low score: Tributylphosphine oxide	[M+H]+	C12H27OP	Organophosphine oxides	MNZAKDODWSQONA-UHFFFAOYSA-N	CCCCP(=O)(CCCC)CCCC	10.663	6.6e-05	1.71125
1064	Positive	0.43	278.913	Unknown	[M+H]+	null	null	null	null	10.198	6.6e-05	1.30791
1065	Positive	6.596	463.281	low score: Methyl-mappain	[M+H]+	C30H38O4	Stilbenes	MRXGJOGASBBDTM-FVFOHYRDSA-N	C/C(C)=C\CC/C(C)=C/CC1=C(C(OC)=CC(/C=C/C2=CC(O)=C(C(O)=C2)C/C=C(C)\C)=C1)O	8.7018	6.6e-05	1.25217
1066	Positive	8.024	393.313	Unknown	[M+H]+	null	null	null	null	0.27374	6.65e-05	1.81083
1067	Positive	0.637	185.996	Unknown	[M+H]+	null	null	null	null	7.8247	6.65e-05	1.50592
1068	Positive	9.005	603.353	low score: (1S,2S,5R,7R,10S,11S,14R,16R,19S,20S,23R,25R)-5,14-diethyl-2,11,20,23-tetramethyl-4,13,22,28,29,30-hexaoxatetracyclo[23.2.1.1?,??.1??,??]triacontane-3,12,21-trione	[M+Na]+	C32H52O9	Macrolides and analogues	MXZXIBZNZUOHER-VHWZNAHMSA-N	O=C1OC(C)CC2OC(CC2)C(C(=O)OC(CC)CC3OC(CC3)C(C(=O)OC(CC)CC4OC(CC4)C1C)C)C	0.28366	6.65e-05	1.32525
1069	Positive	8.267	478.326	low score: N-(4-((6aR,8aS)-4-hydroxy-6a,8a,9-trimethyl-3,4,5,6,6a,6b,7,8,8a,8b,11a,12,12a,12b-tetradecahydro-1H-naphtho[2',1':4,5]indeno[2,1-b]furan-10-yl)-2-methylbutyl)acetamide	[M+Na]+	C29H45NO3	Furostanes and derivatives	CNHACNVJEKRLHF-UDCIVARJSA-N	O=C(NCC(C)CCC=1OC2CC3C4CC=C5CC(O)CCC5(C)C4CCC3(C)C2C1C)C	39.182	6.67e-05	1.64843
1070	Positive	7.083	432.269	low score: NCGC00381130-01!methyl (2E,8E)-9-[3a-hydroxy-6,7-dimethyl-1-(2-methylpropyl)-3-oxo-2,4,7,7a-tetrahydro-1H-isoindol-4-yl]-4,5-dihydroxy-8-methylnona-2,8-dienoate [IIN-based on: CCMSLIB00000846918]	[M-H2O+H]+	C25H39NO6	Bicyclic monoterpenoids	YUXUTEAAGHFKKH-MKQCFFQWSA-N	COC(=O)\\C=C\\C(O)C(O)CC\\C(C)=C\\C1C=C(C)C(C)C2C(CC(C)C)NC(=O)C12O	9.9688	6.68e-05	1.36452
1071	Positive	0.548	302.823	Unknown	[M+H]+	null	null	null	null	252.47	6.72e-05	1.80089
1072	Positive	11.062	100.083	N-Methyl-2-pyrrolidone	[M+H]+	C5H9NO	N-alkylpyrrolidines	SECXISVLQFMRJM-UHFFFAOYSA-N	CN1CCCC1=O	19.199	6.76e-05	1.76518
1073	Positive	0.429	103.963	Unknown	[M+H]+	null	null	null	null	38.013	6.76e-05	1.51838
1074	Positive	9.929	752.585	Unknown	[M+H]+	null	null	null	null	0.21068	6.76e-05	1.4601
1075	Positive	11.578	510.43	Unknown	[M+H]+	null	null	null	null	0.29272	6.76e-05	1.41742
1076	Negative	12.06	363.195	low score: dhas#18	[M-H]-	C17H32O8	Sugar acids and derivatives	KOPWGKUEIMDQOP-YSEGPLCXSA-N	CC(C[C@H](O)CCCC[C@@H](O)CC(O)=O)O[C@@H]1OC(C)[C@H](O)CC1O	2.8385	6.76e-05	1.17549
1077	Positive	7.693	449.355	Unknown	[M+H]+	null	null	null	null	7.6852	6.77e-05	1.23693
1078	Positive	14.557	136.032	Benzothiazole	[M+H]+	C7H5NS	Benzothiazoles	IOJUPLGTWVMSFF-UHFFFAOYSA-N	N1=CSC=2C=CC=CC12	3.8182	6.77e-05	1.5757
1079	Positive	0.044	136.031	no MS2: 2-Benzoxazolinone; CE0; ASSKVPFEZFQQNQ-UHFFFAOYSA-N	[M+H]+	C7H5NO2	Benzoxazolones	ASSKVPFEZFQQNQ-UHFFFAOYSA-N	c1ccc2c(c1)nc(O)o2	2.3768	6.78e-05	1.49061
1080	Positive	16.456	402.431	Unknown	[M+H]+	null	null	null	null	0.26848	6.8e-05	1.73364
1081	Positive	6.241	786.346	low score: Rifaximin	[M+H]+	C43H51N3O11	Macrolactams	NZCRJKRKKOLAOJ-XRCRFVBUSA-N	C[C@H]1/C=C/C=C(\C(=O)NC2=C(C3=C(C4=C(C(=C3O)C)O[C@@](C4=O)(O/C=C/[C@@H]([C@H]([C@H]([C@@H]([C@@H]([C@@H]([C@H]1O)C)O)C)OC(=O)C)C)OC)C)C5=C2N6C=CC(=CC6=N5)C)O)/C	20.208	6.8e-05	1.48125
1082	Positive	0.823	105.943	Unknown	[M+H]+	null	null	null	null	30.126	6.82e-05	1.76031
1083	Positive	11.798	329.294	Unknown	[M+H]+	null	null	null	null	0.25672	6.85e-05	1.67604
1084	Positive	11.97	485.332	low score: NCGC00385760-01!(2S,3S,9R,13R,14S,16R)-2,3,16-trihydroxy-17-[(2R)-2-hydroxy-6-methyl-3-oxohept-6-en-2-yl]-4,4,9,13,14-pentamethyl-1,2,3,7,8,10,12,15,16,17-decahydrocyclopenta[a]phenanthren-11-one [IIN-based on: CCMSLIB00000848112]	[M-H2O+H]+	C30H46O6	Cucurbitacins	JQKLZAQSMGFZSI-NRFHFCOISA-N	CC(=C)CCC(=O)[C@](C)(O)C1[C@H](O)C[C@@]2(C)C3CC=C4C(C[C@H](O)[C@@H](O)C4(C)C)[C@]3(C)C(=O)C[C@]12C	0.19428	6.86e-05	1.49179
1085	Positive	14.613	408.349	Unknown	[M+H]+	null	null	null	null	0.23797	6.87e-05	1.39482
1086	Positive	8.837	520.378	Unknown	[M+H]+	null	null	null	null	0.26109	6.92e-05	1.48079
1087	Positive	14.113	629.421	Unknown	[M+H]+	null	null	null	null	5.6634	6.93e-05	1.20728
1088	Positive	12.605	352.343	Unknown	[M+H]+	null	null	null	null	0.29444	6.94e-05	1.47339
1089	Positive	8.837	558.333	low score: Dimethyl ketal of oxysporidinone_130004	[M+Na]+	C30H49NO7	Terpene glycosides	OKLOELQSMKXXGE-RCCKNPSSSA-N	OC1CC(OC)(OC)CCC1(O)C2=CN(C)C(C(C3OC(/C(C)=C/C(C)CC(C)CC)C(C)CC3)=C2O)=O	0.28169	6.95e-05	1.62876
1090	Positive	11.972	502.362	Unknown	[M+H]+	null	null	null	null	0.19176	6.97e-05	1.50888
1091	Positive	9.209	590.269	no MS2: (NAG)(anNAM)-AqOG[3-NH2-SATA]	[M+2H]2+	C47H78N12O23	Polypeptides	CGGXYVJDGPQESG-UHFFFAOYSA-N	CC(=O)NC1C(OC2C3COC(O3)C(NC(C)=O)C2OC(C)C(=O)NC(C)C(=O)NC(CCC(=O)NC(CCCNC(=O)C(CO)NC(=O)C(C)NC(=O)C(NC(=O)C(C)N)C(C)O)C(=O)NCC(=O)O)C(N)=O)OC(CO)C(O)C1O	11.456	6.98e-05	1.50316
1092	Positive	7.643	460.311	Unknown	[M+H]+	null	null	null	null	0.14843	6.98e-05	1.35964
1093	Positive	0.424	372.819	Unknown	[M+H]+	null	null	null	null	64.404	6.98e-05	1.58144
1094	Positive	9.676	792.062	Unknown	[M+H]+	null	null	null	null	0.22501	6.98e-05	1.55971
1095	Positive	10.024	532.377	Unknown	[M+H]+	null	null	null	null	0.28971	7.07e-05	1.55679
1096	Positive	18.825	516.46	Unknown	[M+H]+	null	null	null	null	0.24805	7.07e-05	1.69082
1097	Positive	10.247	100.083	no MS2: 2-Piperidone; CE0; XUWHAWMETYGRKB-UHFFFAOYSA-N	[M+H]+	C5H9NO	Piperidinones	XUWHAWMETYGRKB-UHFFFAOYSA-N	C1CCN=C(C1)O	17.13	7.08e-05	1.7849
1098	Positive	6.887	324.238	Unknown	[M+H]+	null	null	null	null	0.33477	7.08e-05	1.52307
1099	Positive	0.77	293.876	Unknown	[M+H]+	null	null	null	null	106.2	7.1e-05	1.78952
1100	Positive	6.831	520.177	low score: NCGC00380203-01_C26H30ClNO8_2-{7-Acetoxy-5-chloro-3-[(1E,3E)-3,5-dimethyl-1,3-heptadien-1-yl]-7-methyl-6,8-dioxo-7,8-dihydro-2(6H)-isoquinolinyl}pentanedioic acid	[M+H]+	C26H30ClNO8	Glutamic acid and derivatives	BVIXPBFQDINHQZ-XHBXSBNISA-N	CCC(C)\C=C(C)\C=C\C1=C\C/2=C(Cl)/C(=O)C(C)(OC(C)=O)C(=O)C2=C\N1C(CCC(O)=O)C(O)=O	20.983	7.14e-05	1.3825
1101	Positive	9.622	100.083	N-Methyl-2-pyrrolidone	[M+H]+	C5H9NO	N-alkylpyrrolidines	SECXISVLQFMRJM-UHFFFAOYSA-N	CN1CCCC1=O	16.297	7.22e-05	1.72048
1102	Positive	10.484	680.371	no MS2: NCGC00347880-02!2-[2-[(2-acetamido-4-methylpentanoyl)amino]propanoylamino]-3-hydroxypropanoic acid [IIN-based on: CCMSLIB00000847807]	[2M+NH4]+	C14H25N3O6	Oligopeptides	OSDHWYZIXWDLGD-UHFFFAOYSA-N	CC(C)CC(NC(C)=O)C(=O)NC(C)C(=O)NC(CO)C(O)=O	23.106	7.22e-05	1.54189
1103	Positive	0.354	288.92	Unknown	[M+H]+	null	null	null	null	7.4864	7.22e-05	1.45389
1104	Positive	0.704	536.213	low score: (NAG)(DAM)-AelAA	[M+2H]2+	C41H66N8O23S	Polypeptides	NOQRDLSNYZOTLA-UHFFFAOYSA-N	CC(=O)NC1C(OC2C(COC(C)=O)OC(O)C(NC(C)=O)C2OC(C)C(=O)NC(C)C(=O)NC(CCC(=O)NC(CSCC(N)C(=O)O)C(=O)NC(C)C(=O)NC(C)C(=O)O)C(=O)O)OC(CO)C(O)C1O	0.38523	7.25e-05	1.19308
1105	Positive	8.699	626.437	Unknown	[M+H]+	null	null	null	null	0.2654	7.25e-05	1.5682
1106	Positive	10.617	100.083	N-Methyl-2-pyrrolidone	[M+H]+	C5H9NO	N-alkylpyrrolidines	SECXISVLQFMRJM-UHFFFAOYSA-N	CN1CCCC1=O	17.24	7.3e-05	1.64267
1107	Positive	8.871	100.083	N-Methyl-2-pyrrolidone	[M+H]+	C5H9NO	N-alkylpyrrolidines	SECXISVLQFMRJM-UHFFFAOYSA-N	CN1CCCC1=O	15.289	7.3e-05	1.75429
1108	Positive	10.354	504.342	low score: "((4R)-4-((3R,5S,7R,9S,10S,13R,14S,17R)-3,7-dihydroxy-10,13-dimethylhexadecahydro-1H-cyclopenta[a]phenanthren-17-yl)pentanoyl)-D-phenylalanine"	[M-2H2O+H]+	C33H49NO5	Glycinated bile acids and derivatives	CEMZGPKUKMFNNF-TUBYWNESSA-N	[H][C@@]12[C@H](O)C[C@@H]3C[C@H](O)CC[C@]3(C)[C@H]1CC[C@@]4(C)[C@H]2CC[C@@H]4[C@@H](CCC(N[C@H](CC5=CC=CC=C5)C(O)=O)=O)C	8.2302	7.39e-05	1.45762
1109	Positive	6.096	206.103	no MS2: 1-phenylisoquinoline	[M+H]+	C15H11N	Phenylpyridines	LPCWDYWZIWDTCV-UHFFFAOYSA-N	C12=CC=CC=C1C=CN=C2C3=CC=CC=C3	0.46153	7.39e-05	1.58571
1110	Positive	12.509	755.504	Unknown	[M+H]+	null	null	null	null	21.697	7.42e-05	1.28841
1111	Positive	15.087	381.326	Unknown	[M+H]+	null	null	null	null	0.2581	7.48e-05	1.79256
1112	Positive	0.732	295.875	Unknown	[M+H]+	null	null	null	null	17.046	7.53e-05	1.7051
1113	Positive	10.755	613.302	no MS2: (2R,3R,4S,6R)-6-((10-formyl-5,14-dihydroxy-13-methyl-17-(5-oxo-2,5-dihydrofuran-3-yl)hexadecahydro-1H-cyclopenta[a]phenanthren-3-yl)oxy)-4-methoxy-2-methyltetrahydro-2H-pyran-3-yl acetate	[M+Na]+	C32H46O10	Cardenolide glycosides and derivatives	FPIVCKLVSVCJHW-UHFFFAOYSA-N	O=CC12CCC(OC3OC(C)C(OC(=O)C)C(OC)C3)CC2(O)CCC4C1CCC5(C)C(C6=CC(=O)OC6)CCC45O	22.116	7.55e-05	1.21618
1114	Positive	0.756	270.073	Unknown	[M+H]+	null	null	null	null	22.668	7.55e-05	1.70001
1115	Positive	0.973	427.129	low score: Desoxyrhaponticin	[M+Na]+	C21H24O8	Stilbene glycosides	MFMQRDLLSRLUJY-DXKBKAGUSA-N	OC=1C=C(OC2OC(CO)C(O)C(O)C2O)C=C(C=CC3=CC=C(OC)C=C3)C1	0.28168	7.57e-05	1.7223
1116	Positive	13.349	257.273	Unknown	[M+H]+	null	null	null	null	0.33859	7.59e-05	1.25971
1117	Positive	0.878	155.987	Unknown	[M+H]+	null	null	null	null	0.31116	7.6e-05	1.60037
1118	Positive	12.98	331.31	low score: MMV687273	[M+H]+	C22H38N2	Monoterpenoids	JFIBVDBTCDTBRH-IDUWFGFVSA-N	C(=C(C)C)CCC(=CCNCCNC1C2CC3CC(C2)CC1C3)C	0.28455	7.6e-05	1.74921
1119	Positive	16.135	337.322	Unknown	[M+H]+	null	null	null	null	5.4524	7.67e-05	1.14848
1120	Positive	9.012	314.053	low score: Isazofos	[M+H]+	C9H17ClN3O3PS	Aryl thiophosphates	XRHGWAGWAHHFLF-UHFFFAOYSA-N	CCOP(=S)(OCC)OC1=NN(C(C)C)C(Cl)=N1	15.369	7.69e-05	1.60286
1121	Positive	0.427	283.876	Unknown	[M+H]+	null	null	null	null	133.25	7.71e-05	1.65211
1122	Positive	0.603	243.845	Unknown	[M+H]+	null	null	null	null	127.48	7.72e-05	1.78004
1123	Positive	6.408	416.28	low score: Salmeterol	[M+H]+	C25H37NO4	Benzyl alcohols	GIIZNNXWQWCKIB-UHFFFAOYSA-N	[H]OC([H])([H])c(c(O[H])2)c([H])c(c([H])c([H])2)C([H])(O[H])C([H])([H])N([H])C([H])([H])C([H])([H])C([H])([H])C([H])([H])C([H])([H])C([H])([H])OC([H])([H])C([H])([H])C([H])([H])C([H])([H])c(c([H])1)c([H])c([H])c([H])c([H])1	2.4706	7.72e-05	1.50479
1124	Positive	1.15	154.068	no MS2: CREATINE	[M+Na]+	C4H9N3O2	Alpha amino acids and derivatives	CVSVTCORWBXHQV-UHFFFAOYSA-N	CN(CC(O)=O)C(N)=N	0.45447	7.74e-05	1.38528
1125	Positive	14.38	387.307	low score: Bourgeanic acid	[M+H]+	C22H42O5	3-(3-hydroxyalkanoyloxy)alkanoic acids	ZQEUMOKDJCSNHB-IHRHECOVSA-N	CC[C@@H](C)C[C@@H](C)[C@@H]([C@H](C)C(=O)O[C@@H]([C@H](C)C[C@H](C)CC)[C@H](C)C(=O)O)O	24.429	7.75e-05	1.38846
1126	Positive	10.755	616.31	low score: Hypaconitine	[M+H]+	C33H45NO10	Aconitane-type diterpenoid alkaloids	FIDOCHXHMJHKRW-ILSCITHTSA-N	O=C(OC1C2C3CC1(O)C(OC)C(O)C2(OC(=O)C)C4C(OC)C5C6(COC)CN(C)C4C35C(OC)CC6)C=7C=CC=CC7	59.066	7.75e-05	1.69055
1127	Negative	8.533	427.238	low score: Andrastin D	[M-H]-	C26H36O5	Oxosteroids	SMUNNMAWNRFDPB-UWWAQUNASA-N	CC1=C[C@H]2[C@@]3(CCC(=O)C([C@H]3CC[C@@]2([C@]4([C@@]1(C(=C(C4=O)C)O)C)C(=O)OC)C)(C)C)C	0.25896	7.84e-05	1.37441
1128	Positive	13.601	157.096	no MS2: Unknown (carbon number 8); PlaSMA ID-276	[M+H]+	C8H12O3	Unknown	null	null	5.7324	7.88e-05	1.52471
1129	Positive	11.972	543.39	low score: 3-[(3-OH-myristoyl)oxy]decanoyl glutamine from Cohen et al Nature 549 48 53 2017	[M+H]+	C29H54N2O7	Glutamine and derivatives	SGROMIWARYNAJQ-UHFFFAOYSA-N	O=C(CC(OC(CC(O)CCCCCCCCCCC)=O)CCCCCCC)NC(CCC(N)=O)C(O)=O	0.21883	7.88e-05	1.59035
1130	Positive	6.36	100.083	no MS2: 2-Piperidone; CE0; XUWHAWMETYGRKB-UHFFFAOYSA-N	[M+H]+	C5H9NO	Piperidinones	XUWHAWMETYGRKB-UHFFFAOYSA-N	C1CCN=C(C1)O	11.088	7.99e-05	1.68739
1131	Positive	0.427	232.907	Unknown	[M+H]+	null	null	null	null	125.65	8e-05	1.72051
1132	Positive	0.399	376.821	Unknown	[M+H]+	null	null	null	null	61.512	8.06e-05	1.26872
1133	Positive	7.726	393.313	low score: DEOXYCHOLIC ACID	[M+H]+	C24H40O4	Dihydroxy bile acids, alcohols and derivatives	KXGVEGMKQFWNSR-LLQZFEROSA-N	C[C@H](CCC(=O)O)[C@H]1CC[C@@H]2[C@@]1([C@H](C[C@H]3[C@H]2CC[C@H]4[C@@]3(CC[C@H](C4)O)C)O)C	8.7624	8.09e-05	1.59941
1134	Positive	0.426	254.874	Unknown	[M+H]+	null	null	null	null	42.738	8.15e-05	1.47591
1135	Positive	8.982	530.366	no MS2: Histidine conjugated chenodeoxycholic acid	[M+H]+	C30H47N3O5	Glycinated bile acids and derivatives	XTVWUFJAQMCVQZ-KJUDKMOBSA-N	C[C@H](CCC(N[C@@H](CC1=CNC=N1)C(O)=O)=O)[C@H]2CC[C@@]3([H])[C@]4([H])[C@H](O)C[C@]5([H])C[C@H](O)CC[C@]5(C)[C@H]4CC[C@@]32C	0.32928	8.17e-05	1.54345
1136	Positive	0.428	295.902	Unknown	[M+H]+	null	null	null	null	15.148	8.45e-05	1.50761
1137	Positive	0.241	309.226	low score: h_88_stanozolol_4b_oh	[M-2H2O+H]+	C21H32N2O2	Estrane steroids	OCUSYXNRARMJHS-JQPLYGKBSA-N	C[C@](O)(CC1)[C@@]2(C)[C@@H]1[C@H](CC[C@@H]3[C@]4(C)CC5=CNN=C5C3O)[C@@H]4CC2	3.3578	8.49e-05	1.2883
1138	Positive	8.49	528.33	no MS2: "2-((4R)-4-((3R,5S,7S,9S,10S,13R,14S,17R)-3,7-dihydroxy-10,13-dimethylhexadecahydro-1H-cyclopenta[a]phenanthren-17-yl)-2,2-dimethylpentanamido)ethane-1-sulfonic acid"	[M+H]+	C28H49NO6S	Taurinated bile acids and derivatives	UXAHTIGXQXJADE-VHDFTFQCSA-N	[H][C@@]12[C@@H](O)C[C@]3([H])C[C@H](O)CC[C@]3(C)[C@H]1CC[C@@]4(C)[C@H]2CC[C@@H]4[C@@H](CCC(NCC(C)(C)S(=O)(O)=O)=O)C	3.4092	8.53e-05	1.19207
1139	Positive	1.02	327.07	no MS2: Triphenylphosphate	[M+H]+	C18H15O4P	Aryl phosphotriesters	XZZNDPSIHUTMOC-UHFFFAOYSA-N	O=P(OC1=CC=CC=C1)(OC1=CC=CC=C1)OC1=CC=CC=C1	3.6877	8.56e-05	1.44457
1140	Positive	7.639	163.086	low score: Methyl trans-cinnamic acid	[M+H]+	C10H10O2	Cinnamic acids	RURHILYUWQEGOS-VOTSOKGWSA-N	Cc1ccc(cc1)/C=C/C(=O)O	3.0991	8.62e-05	1.19293
1141	Positive	12.977	353.301	Unknown	[M+H]+	null	null	null	null	0.26338	8.62e-05	1.77272
1142	Positive	0.22	593.196	no MS2: Pantethine	[M+K]+	C22H42N4O8S2	Beta amino acids and derivatives	DJWYOLJPSHDSAL-UHFFFAOYSA-N	OC(=NCCSSCCN=C(O)CCN=C(O)C(O)C(C)(C)CO)CCN=C(O)C(O)C(C)(C)CO	49.902	8.62e-05	1.47658
1143	Positive	1.044	588.977	Unknown	[M+H]+	null	null	null	null	3.7624	8.62e-05	1.2003
1144	Positive	0.717	279.185	low score: (6E)-2,6,10-trimethyldodeca-6,11-diene-2,3,10-triol_major	[M+Na]+	C15H28O3	Sesquiterpenoids	BGUYVWYUIXKRDO-XYOKQWHBSA-N	C=CC(C)(O)CCC=C(C)CCC(O)C(C)(C)O	0.35861	8.62e-05	1.31477
1145	Negative	7.047	624.151	Unknown	[M-H]-	null	null	null	null	0.12837	8.62e-05	1.32268
1146	Positive	8.954	502.327	low score: (2R,3S,4S,5S,6R)-2-[[7-hydroxy-4-[(Z)-5-hydroxy-3-methylpent-3-enyl]-4a,8,8-trimethyl-3-methylidene-2,4,5,6,7,8a-hexahydro-1H-naphthalen-2-yl]oxy]-6-(hydroxymethyl)oxane-3,4,5-triol	[M+NH4]+	C26H44O8	Diterpene glycosides	JECOCDKQCZSANH-RFKAOMIISA-N	OCC=C(C)CCC1C(=C)C(OC2OC(CO)C(O)C(O)C2O)CC3C(C)(C)C(O)CCC13C	4.8434	8.64e-05	1.64435
1147	Positive	7.919	223.079	low score: Cystathionine	[M+H]+	C7H14N2O4S	L-cysteine-S-conjugates	ILRYLPWNYFXEMH-WHFBIAKZSA-N	OC(=O)[C@@H](N)CCSC[C@@H](N)C(O)=O	14.643	8.73e-05	1.8431
1148	Positive	0.919	234	Unknown	[M+H]+	null	null	null	null	9.502	8.74e-05	1.45413
1149	Positive	7.117	970.994	Unknown	[M+H]+	null	null	null	null	0.26933	8.74e-05	1.57607
1150	Negative	1.289	700.077	Unknown	[M-H]-	null	null	null	null	0.082947	8.74e-05	1.33444
1151	Positive	1.37	583.431	low score: Diadinochrome	[M+H]+	C40H54O3	Triterpenoids	USOIUYXBYYVLLZ-PMBXBIOBSA-N	CC1=C(C(C[C@@H](C1)O)(C)C)C#C/C(=C/C=C/C(=C/C=C/C=C(\C)/C=C/C=C(\C)/[C@@H]2C=C3[C@](O2)(C[C@H](CC3(C)C)O)C)/C)/C	0.27617	8.85e-05	1.65256
1152	Positive	8.18	473.299	low score: NCGC00347850-02_C26H42O6_2-(4a-Methyl-8-methylenedecahydro-2-naphthalenyl)-2-propanyl 6-deoxy-2-O-[(2E)-2-methyl-2-butenoyl]hexopyranoside	[M+Na]+	C26H42O6	Eudesmane, isoeudesmane or cycloeudesmane sesquiterpenoids	QKRNXYDUTFTSBG-NVNXTCNLSA-N	C\C=C(\C)C(=O)OC1C(O)C(O)C(C)OC1OC(C)(C)C2CCC3(C)CCCC(=C)C3C2	0.24881	8.9e-05	1.77499
1153	Positive	8.829	372.345	low score: NCGC00380102-01!3-hexadecyl-4-methoxy-5-methyloxolan-2-one [IIN-based: Match]	[M+NH4]+	C22H42O3	Gamma butyrolactones	DJNFXUFERDZHCD-UHFFFAOYSA-N	CCCCCCCCCCCCCCCCC1C(OC)C(C)OC1=O	0.29901	8.9e-05	1.28427
1154	Positive	0.172	632.474	Unknown	[M+H]+	null	null	null	null	0.084849	9.01e-05	1.33329
1155	Positive	15.274	628.238	low score: NCGC00385646-01!7-[(2S,3R,4S,5S,6R)-4,5-dihydroxy-6-(hydroxymethyl)-3-[(2S,3R,4R,5R,6S)-3,4,5-trihydroxy-6-methyloxan-2-yl]oxyoxan-2-yl]oxy-5-hydroxy-2-(4-hydroxy-3-methoxyphenyl)-2,3-dihydrochromen-4-one	[M+NH4]+	C28H34O15	Flavonoid-7-O-glycosides	AODBEDTXATXPNK-FCNYPLLVSA-N	COC1=C(O)C=CC(=C1)C2CC(=O)C3=C(O)C=C(O[C@@H]4O[C@H](CO)[C@@H](O)[C@H](O)[C@H]4O[C@@H]5O[C@@H](C)[C@H](O)[C@@H](O)[C@H]5O)C=C3O2	123.22	9.01e-05	1.6681
1156	Positive	10.86	582.467	Unknown	[M+H]+	null	null	null	null	0.25941	9.01e-05	1.76478
1157	Positive	8.65	330.359	Unknown	[M+H]+	null	null	null	null	25.328	9.04e-05	1.57301
1158	Positive	9.255	494.837	Unknown	[M+H]+	null	null	null	null	0.293	9.04e-05	1.39049
1159	Positive	8.905	590.368	Unknown	[M+H]+	null	null	null	null	0.36574	9.04e-05	1.20902
1160	Positive	7.805	504.332	low score: glutamate conjugated chenodeoxycholic acid	[M-H2O+H]+	C29H47NO7	Glycinated bile acids and derivatives	MHOZNCAVRHAOKT-PYDJSGOHSA-N	O=C(O)CCC(N=C(O)CCC(C)C1CCC2C3C(O)CC4CC(O)CCC4(C)C3CCC12C)C(=O)O	20.366	9.06e-05	1.57658
1161	Positive	9.53	358.394	Unknown	[M+H]+	null	null	null	null	38.962	9.09e-05	1.65186
1162	Positive	1.128	126.034	no MS2: 2-Aminoethylphosphonic acid	[M+H]+	C2H8NO3P	Organic phosphonic acids	QQVDJLLNRSOCEL-UHFFFAOYSA-N	O=P(O)(O)CCN	0.28957	9.13e-05	1.58879
1163	Positive	1.012	514.914	Unknown	[M+H]+	null	null	null	null	3.8619	9.13e-05	1.29437
1164	Positive	0.65	209.935	Unknown	[M+H]+	null	null	null	null	31.252	9.14e-05	1.64616
1165	Positive	15.518	285.305	low score: N-[3-(Dimethylamino)propyl]dodecanamide	[M+H]+	C17H36N2O	N-acyl amines	TWMFGCHRALXDAR-UHFFFAOYSA-N	CCCCCCCCCCCC(=O)NCCCN(C)C	0.28866	9.14e-05	1.2398
1166	Positive	12.034	480.194	low score: NCGC00381048-01_C25H26O7_	[M+NH4]+	C25H26O7	Terpene lactones	YEOVVCBEYCCOOP-VGOFMYFVSA-N	CC(C)=CCC/C(C)=C/CC1=C(O)C(=C(O)C=C1)C2OC(=O)C3=C2C(=CC(=C3)C(O)=O)O	4.67	9.14e-05	1.08838
1167	Positive	9.382	100.083	N-Methyl-2-pyrrolidone	[M+H]+	C5H9NO	N-alkylpyrrolidines	SECXISVLQFMRJM-UHFFFAOYSA-N	CN1CCCC1=O	15.806	9.16e-05	1.63761
1168	Positive	1.051	620.807	Unknown	[M+H]+	null	null	null	null	5.1127	9.17e-05	1.52767
1169	Positive	12.22	443.366	Unknown	[M+H]+	null	null	null	null	9.7272	9.2e-05	1.48781
1170	Positive	6.094	224.145	no MS2: Camellimidazole D	[M+H]+	C10H17N5O	2-heteroaryl carboxamides	VTPXABIHFAGVJO-UHFFFAOYSA-N	CN1C2=C(N(CN(CN(C)C2=O)C)C)N=C1	0.42578	9.2e-05	1.32785
1171	Negative	8.876	317.198	Unknown	[M-H]-	null	null	null	null	5.1884	9.2e-05	1.18754
1172	Positive	6.478	413.268	low score: 2-acetoxy-4-pentadecylbenzoic acid	[M+Na]+	C24H38O4	Acylsalicylic acids	FMPIFABORGZGFA-UHFFFAOYSA-N	OC(C1=CC=C(CCCCCCCCCCCCCCC)C=C1OC(C)=O)=O	3.7901	9.25e-05	1.60491
1173	Positive	0.679	129.944	Unknown	[M+H]+	null	null	null	null	66.107	9.38e-05	1.66045
1174	Positive	1.613	357.246	low score: 2,4-dihydroxy-6-methyl-3-[(2E,6E)-3,7,11-trimethyldodeca-2,6,10-trienyl]benzaldehyde	[M+2H]2+	C23H32O3	Sesquiterpenoids	QAPOXOGEDXIOHD-VZRGJMDUSA-N	O=CC1=C(O)C(=C(O)C=C1C)CC=C(C)CCC=C(C)CCC=C(C)C	0.27759	9.38e-05	1.63843
1175	Positive	1.041	564.84	Unknown	[M+H]+	null	null	null	null	6.7307	9.41e-05	1.5356
1176	Positive	1.955	279.184	low score: (6E)-2,6,10-trimethyldodeca-6,11-diene-2,3,10-triol_major	[M+Na]+	C15H28O3	Sesquiterpenoids	BGUYVWYUIXKRDO-XYOKQWHBSA-N	C=CC(C)(O)CCC=C(C)CCC(O)C(C)(C)O	0.35157	9.41e-05	1.31599
1177	Positive	7.8	528.332	low score: "2-((4R)-4-((3R,5S,7S,9S,10S,13R,14S,17R)-3,7-dihydroxy-10,13-dimethylhexadecahydro-1H-cyclopenta[a]phenanthren-17-yl)-2,2-dimethylpentanamido)ethane-1-sulfonic acid"	[M+H]+	C28H49NO6S	Taurinated bile acids and derivatives	UXAHTIGXQXJADE-VHDFTFQCSA-N	[H][C@@]12[C@@H](O)C[C@]3([H])C[C@H](O)CC[C@]3(C)[C@H]1CC[C@@]4(C)[C@H]2CC[C@@H]4[C@@H](CCC(NCC(C)(C)S(=O)(O)=O)=O)C	10.33	9.46e-05	1.26221
1178	Positive	0.044	115.103	Unknown	[M+H]+	null	null	null	null	10.119	9.47e-05	1.73054
1179	Positive	0.774	253.855	Unknown	[M+H]+	null	null	null	null	79.921	9.47e-05	1.74361
1180	Positive	6.019	261.149	low score: Isoleucylglutamate	[M+H]+	C11H20N2O5	Dipeptides	KTGFOCFYOZQVRJ-UHFFFAOYSA-N	O=C(O)CCC(NC(=O)C(N)C(C)CC)C(=O)O	10.193	9.49e-05	1.62383
1181	Positive	9.656	805.071	low score: Leptosin A_130037	[M+H]+	C32H32N6O7S6	Pyrroloindoles	HEIXSBSYEOOAIS-DNVIVPPASA-N	[H][C@@]1(O)[C@@](C(N(C)[C@]2(C(C)C)C3=O)=O)(SS2)N3[C@@]4([H])NC5=C([C@]41[C@]67C8=C(N[C@@]6([H])N(C([C@](CO)(SSSS9)N(C)C%10=O)=O)[C@]%109[C@]7(O)[H])C=CC=C8)C=CC=C5	0.20011	9.49e-05	1.57985
1182	Negative	18.405	222.817	Unknown	[M-H]-	null	null	null	null	0.3179	9.5e-05	1.35272
1183	Positive	13.475	674.522	Unknown	[M+H]+	null	null	null	null	0.23455	9.51e-05	1.36308
1184	Positive	14.747	100.084	no MS2: 2-Piperidone; CE0; XUWHAWMETYGRKB-UHFFFAOYSA-N	[M+H]+	C5H9NO	Piperidinones	XUWHAWMETYGRKB-UHFFFAOYSA-N	C1CCN=C(C1)O	22.049	9.55e-05	1.69031
1185	Positive	6.225	437.267	low score: tBuO-Glu(Ome)-Val-hexanoate	[M+2Na-H]+	C21H38N2O6	Peptides	KMRMSYHYOVGWCM-UHFFFAOYSA-N	CCCCCC(NC(C(C)C)C(NC(CCC(OC)=O)C(OC(C)(C)C)=O)=O)=O	16.762	9.55e-05	1.62161
1186	Positive	1.695	122.972	Unknown	[M+H]+	null	null	null	null	19.871	9.64e-05	1.31137
1187	Positive	7.799	295.139	low score: 11-(phenylcarbonyl)-7,11-diazatricyclo[7.3.1.0<2,7>]trideca-2,4-dien-6-one	[M+H]+	C18H18N2O2	N-benzoylpiperidines	HODDQHCNQOBZKP-UHFFFAOYSA-N	C1C2CN(CC1C3=CC=CC(=O)N3C2)C(=O)C4=CC=CC=C4	6.8052	9.64e-05	1.25268
1188	Positive	6.352	333.212	low score: 14-deoxy-11,12-dihydroandrographolide	[M+H]+	C20H28O4	Diterpene lactones	GQPOXOPEDHRPQT-CRBRZBHVSA-N	O=C1OCC(C=CC2C(=C)CCC3C(C)(CO)C(O)CCC23C)=C1	6.3972	9.67e-05	1.66053
1189	Positive	0.422	374.816	Unknown	[M+H]+	null	null	null	null	30.712	9.72e-05	1.57977
1190	Positive	9.17	100.084	N-Methyl-2-pyrrolidone	[M+H]+	C5H9NO	N-alkylpyrrolidines	SECXISVLQFMRJM-UHFFFAOYSA-N	CN1CCCC1=O	15.046	9.74e-05	1.68368
1191	Positive	8.761	519.362	no MS2: "(3R,5R,7R,8S,9S,10S,12S,13R,14S,17R)-12-hydroxy-10,13-dimethyl-17-((R)-5-(oxetan-3-yl)pentan-2-yl)hexadecahydro-1H-cyclopenta[a]phenanthrene-3,7-diyl diacetate"	[M+H]+	C31H50O6	Cholestane steroids	PWKMCTSCOMHDIZ-BFFUGBCUSA-N	C[C@@H]([C@H]1CC[C@]2([H])[C@]1(C)[C@@H](O)C[C@@]3([H])[C@]2([H])[C@H](OC(C)=O)C[C@]4([H])[C@]3(C)CC[C@@H](OC(C)=O)C4)CCCC5COC5	6.3769	9.74e-05	1.57507
1192	Positive	1.065	943.823	Unknown	[M+H]+	null	null	null	null	6.3907	9.74e-05	1.27279
1193	Positive	8.862	124.094	low score: HISTIDINOL	[M-H2O+H]+	C6H11N3O	Aralkylamines	ZQISRDCJNBUVMM-YFKPBYRVSA-N	N[C@H](CO)CC1=CN=CN1	3.037	9.78e-05	1.55419
1194	Positive	0.062	223.078	no MS2: 2-methylanthra-9,10-quinone	[M+H]+	C15H10O2	Anthraquinones	NJWGQARXZDRHCD-UHFFFAOYSA-N	O=C1C=2C=CC=CC2C(=O)C3=CC(=CC=C13)C	13.59	9.78e-05	1.70246
1195	Positive	1.143	230.156	Unknown	[M+H]+	null	null	null	null	8.8132	9.78e-05	1.52466
1196	Positive	5.962	353.246	low score: "(R)-4-((3R,5S,8R,9S,10S,13R,14S,17R)-3-hydroxy-10,13-dimethyl-7-oxohexadecahydro-1H-cyclopenta[a]phenanthren-17-yl)pent-2-enoic acid"	[M-2H2O+H]+	C24H36O4	Oxosteroids	MEFHLJCGADQRRZ-NLMWUSBQSA-N	C[C@@H]([C@H]1CC[C@]2([H])[C@]1(C)CC[C@@]3([H])[C@@]2([H])C(C[C@@]4([H])[C@]3(C)CC[C@@H](O)C4)=O)/C=C/C(O)=O	24.61	9.78e-05	1.62868
1197	Positive	14.644	782.625	Unknown	[M+H]+	null	null	null	null	0.30646	9.78e-05	1.5607
1198	Positive	8.91	280.184	low score: (2R,3R,4S,5S,6R)-2-[(Z)-hex-3-enoxy]-6-(hydroxymethyl)oxane-3,4,5-triol_major	[M+NH4]+	C12H22O6	Fatty acyl glycosides of mono- and disaccharides	OZIPFYKAIOOVEJ-ODWUMMNUSA-N	CCC=CCCOC1OC(CO)C(O)C(O)C1O	0.48263	9.84e-05	1.45749
1199	Negative	12.594	329.233	low score: FA 18:1+3O; PlaSMA ID-738	[M-H]-	C18H34O5	Oxidized fatty acids	MDIUMSLCYIJBQC-UHFFFAOYNA-N	O=C(O)CCCCCCCC(O)C=CC(O)C(O)CCCCC	3.2794	9.86e-05	1.22737
1200	Positive	15.293	601.486	Unknown	[M+H]+	null	null	null	null	0.24904	9.91e-05	1.59276
1201	Positive	11.05	301.169	low score: adrenosterone	[M+H]+	C19H24O3	Androgens and derivatives	RZRPTBIGEANTGU-IRIMSJTPSA-N	O=C1C=C2CCC3C(C(=O)CC4(C(=O)CCC34)C)C2(C)CC1	0.42796	9.91e-05	1.32466
1202	Positive	9.026	588.276	Unknown	[M+H]+	null	null	null	null	128.55	9.92e-05	1.66409
1203	Positive	14.314	190.015	Unknown	[M+H]+	null	null	null	null	42.18	9.95e-05	1.62689
1204	Positive	0.425	256.874	Unknown	[M+H]+	null	null	null	null	50.592	9.97e-05	1.51738
1205	Positive	0.093	529.459	Unknown	[M+H]+	null	null	null	null	0.26766	9.97e-05	1.66749
1206	Positive	1.14	146.13	low score: Lysinamide	[M+H]+	C6H15N3O	Alpha amino acid amides	HKXLAGBDJVHRQG-YFKPBYRVSA-N	NCCCC[C@H](N)C(N)=O	0.31745	0.00010029	1.15509
1207	Positive	9.351	616.295	low score: NCGC00381001-01_C32H41NO11_	[M+H]+	C32H41NO11	Glutamic acid and derivatives	AAIIJIOWYALNCC-PPNZYPONSA-N	C[C@@H]1CCC2C(C)(C)[C@H](OC(C)=O)[C@@H](C[C@]2(C)[C@@]13CC4=C(O3)C5=C(C=C4O)C(=O)N(C5)[C@@H](CCC(O)=O)C(O)=O)OC(C)=O	13.133	0.00010029	1.59037
1208	Positive	12.515	400.372	Unknown	[M+H]+	null	null	null	null	0.30946	0.00010092	1.75217
1209	Positive	7.988	225.212	low score: N~1~,N~4~-bis(3-aminopropyl)-1,4-butanediamine	[M+Na]+	C10H26N4	Dialkylamines	PFNFFQXMRSDOHW-UHFFFAOYSA-N	NCCCNCCCCNCCCN	28.67	0.00010114	1.79357
1210	Positive	0.428	139.996	Unknown	[M+H]+	null	null	null	null	60.871	0.00010224	1.57433
1211	Positive	6.686	968.546	Unknown	[M+H]+	null	null	null	null	7.276	0.00010225	1.21453
1212	Positive	9.264	124.094	HISTIDINOL	[M-H2O+H]+	C6H11N3O	Aralkylamines	ZQISRDCJNBUVMM-YFKPBYRVSA-N	N[C@H](CO)CC1=CN=CN1	4.6951	0.00010231	1.63786
1213	Positive	10.686	482.358	Unknown	[M+H]+	null	null	null	null	0.39729	0.00010241	1.24408
1214	Positive	6.065	328.235	low score: (3R,5S,17R)-17-hydroxy-10,13-dimethylhexadecahydro-1H-cyclopenta[a]phenanthren-3-aminium chloride	[M+H]+	C19H34ClNO	Androstane steroids	GYQZNNAZXVKYOR-YHGFUEDJSA-N	[Cl-].OC1CCC2C3CCC4CC([NH3+])CCC4(C)C3CCC12C	2.9344	0.00010266	1.1296
1215	Positive	19.021	776.287	low score: methyl (2S,3R,4S)-3-ethenyl-4-[(Z)-3-[(2S,3R,4R)-3-ethenyl-5-methoxycarbonyl-2-[(2S,3R,4S,5S,6R)-3,4,5-trihydroxy-6-(hydroxymethyl)oxan-2-yl]oxy-3,4-dihydro-2H-pyran-4-yl]-4-oxobut-2-enyl]-2-[(2S,3R,4S,5S,6R)-3,4,5-trihydroxy-6-(hydroxymethyl)oxan-2-yl]oxy-3,4-dihydro-2H-pyran-5-carboxylate	[M+NH4]+	C34H46O19	Terpene glycosides	MWLKXILGJPSPKZ-LWSBBEHMSA-N	O=CC(=CCC1C(=COC(OC2OC(CO)C(O)C(O)C2O)C1C=C)C(=O)OC)C3C(=COC(OC4OC(CO)C(O)C(O)C4O)C3C=C)C(=O)OC	30.519	0.00010269	1.53218
1216	Positive	0.08	207.045	low score: 5-(1,2-dithiolan-3-yl)pentanoic acid	[M+H]+	C8H14O2S2	Lipoic acids and derivatives	AGBQKNBQESQNJD-UHFFFAOYSA-N	O=C(O)CCCCC1SSCC1	4.0268	0.00010291	1.54877
1217	Positive	7.766	261.136	low score: Diaveridine	[M+H]+	C13H16N4O2	Dimethoxybenzenes	LDBTVAXGKYIFHO-UHFFFAOYSA-N	COC1=C(C=C(C=C1)CC2=CN=C(N=C2N)N)OC	0.33829	0.00010299	1.53958
1218	Positive	14.921	100.083	no MS2: 2-Piperidone; CE0; XUWHAWMETYGRKB-UHFFFAOYSA-N	[M+H]+	C5H9NO	Piperidinones	XUWHAWMETYGRKB-UHFFFAOYSA-N	C1CCN=C(C1)O	21.427	0.000103	1.69808
1219	Positive	0.429	272.893	Unknown	[M+H]+	null	null	null	null	4.4956	0.00010424	1.09641
1220	Positive	7.446	100.084	no MS2: 2-Piperidone; CE0; XUWHAWMETYGRKB-UHFFFAOYSA-N	[M+H]+	C5H9NO	Piperidinones	XUWHAWMETYGRKB-UHFFFAOYSA-N	C1CCN=C(C1)O	13.72	0.00010546	1.71177
1221	Positive	0.513	293.874	Unknown	[M+H]+	null	null	null	null	85.263	0.00010551	1.84873
1222	Positive	0.597	129.944	Unknown	[M+H]+	null	null	null	null	56.9	0.00010636	1.61979
1223	Positive	8.618	473.306	no MS2: NCGC00347366-03!2,4,6-trihydroxy-5-[1-(4-hydroxy-1,1,4,7-tetramethyl-1a,2,3,4a,5,6,7a,7b-octahydrocyclopropa[h]azulen-7-yl)-3-methylbutyl]benzene-1,3-dicarbaldehyde	[M+H]+	C28H40O6	5,10-cycloaromadendrane sesquiterpenoids	IBLPTYJTKWQCDX-UHFFFAOYSA-N	CC(C)CC(C1=C(O)C(C=O)=C(O)C(C=O)=C1O)C2(C)CCC3C2C4C(CCC3(C)O)C4(C)C	0.25305	0.00010636	1.5298
1224	Positive	8.771	494.842	Unknown	[M+H]+	null	null	null	null	154.27	0.00010636	1.61608
1225	Positive	0.697	241.849	Unknown	[M+H]+	null	null	null	null	65.305	0.00010664	1.59417
1226	Positive	13.515	171.112	no MS2: Levetiracetam	[M+2Na]2+	C8H14N2O2	Alpha amino acids and derivatives	HPHUVLMMVZITSG-LURJTMIESA-N	O=C1N(CCC1)C(C(=N)O)CC	19.131	0.00010695	1.71625
1227	Positive	1.037	700.827	Unknown	[M+H]+	null	null	null	null	6.7356	0.00010711	1.33778
1228	Positive	1.103	822.75	Unknown	[M+H]+	null	null	null	null	3.7959	0.00010717	1.2814
1229	Positive	13.386	100.084	no MS2: 2-Piperidone; CE0; XUWHAWMETYGRKB-UHFFFAOYSA-N	[M+H]+	C5H9NO	Piperidinones	XUWHAWMETYGRKB-UHFFFAOYSA-N	C1CCN=C(C1)O	28.414	0.00010726	1.74316
1230	Positive	8.721	100.083	N-Methyl-2-pyrrolidone	[M+H]+	C5H9NO	N-alkylpyrrolidines	SECXISVLQFMRJM-UHFFFAOYSA-N	CN1CCCC1=O	15.031	0.00010729	1.65919
1231	Positive	11.971	245.192	no MS2: 6-methyl-2-(4-methyl-3-cyclohexen-1-yl)-5-hepten-2-ol	[M+Na]+	C15H26O	Sesquiterpenoids	RGZSQWQPBWRIAQ-HUUCEWRRSA-N	OC(C)(CCC=C(C)C)C1CC=C(C)CC1	0.30805	0.00010737	1.62134
1232	Positive	1.035	458.977	Unknown	[M+H]+	null	null	null	null	0.28308	0.00010769	1.57514
1233	Positive	9.003	498.095	Unknown	[M+H]+	null	null	null	null	11.428	0.00010778	1.67855
1234	Positive	6.016	284.207	low score: Unknown (carbon number 14); PlaSMA ID-1373	[M+H]+	C14H25N3O3	Unknown	null	null	2.1864	0.00010829	1.43455
1235	Positive	1.121	136.087	Unknown	[M+H]+	null	null	null	null	12.864	0.00010845	1.83457
1236	Positive	0.43	100.964	Unknown	[M+H]+	null	null	null	null	61.532	0.00010851	1.43166
1237	Positive	14.353	123.1	no MS2: 4-(Dimethylamino)pyridine	[M+H]+	C7H10N2	Dialkylarylamines	VHYFNPMBLIVWCW-UHFFFAOYSA-N	N=1C=CC(=CC1)N(C)C	2.9724	0.00010852	1.6185
1238	Positive	0.536	132.941	Unknown	[M+H]+	null	null	null	null	52.971	0.00010873	1.64744
1239	Positive	8.124	281.163	low score: (5R)-trans-1,7-diphenyl-5-hydroxy-6-hepten-3-one	[M+H]+	C19H20O2	Linear diarylheptanoids	NEQGOKAKPXXESR-YLZCUGDYSA-N	O=C(CCC=1C=CC=CC1)CC(O)C=CC=2C=CC=CC2	0.20322	0.00010983	1.56801
1240	Positive	0.551	100.083	N-Methyl-2-pyrrolidone	[M+H]+	C5H9NO	N-alkylpyrrolidines	SECXISVLQFMRJM-UHFFFAOYSA-N	CN1CCCC1=O	9.8195	0.00011019	1.69964
1241	Positive	7.244	100.084	no MS2: 2-Piperidone; CE0; XUWHAWMETYGRKB-UHFFFAOYSA-N	[M+H]+	C5H9NO	Piperidinones	XUWHAWMETYGRKB-UHFFFAOYSA-N	C1CCN=C(C1)O	13.992	0.00011019	1.71411
1242	Positive	0.75	284.854	Unknown	[M+H]+	null	null	null	null	167.31	0.00011019	1.76558
1243	Positive	0.491	308.815	Unknown	[M+H]+	null	null	null	null	52.189	0.00011019	1.68327
1244	Positive	15.555	606.5	Unknown	[M+H]+	null	null	null	null	0.24595	0.00011084	1.56434
1245	Positive	10.377	536.411	low score: NCGC00347555-02!2-(21-amino-3,20-dihydroxydocosan-2-yl)oxy-6-(hydroxymethyl)oxane-3,4,5-triol	[M+H]+	C28H57NO8	Fatty acyl glycosides of mono- and disaccharides	FZSYYVOKNJZJTF-UHFFFAOYSA-N	CC(N)C(O)CCCCCCCCCCCCCCCCC(O)C(C)OC1OC(CO)C(O)C(O)C1O	0.28127	0.0001117	1.61468
1246	Positive	8.527	522.292	low score: Carmaphycin A enone analogue	[M+Na]+	C25H45N3O5S	Dipeptides	NHLBOKNHQIEJIH-IWHCYLEESA-N	CC(C([C@H](CC(C)C)NC([C@H](CCS(C)=O)NC([C@H](C(C)C)NC(CCCCC)=O)=O)=O)=O)=C	2.9798	0.0001117	1.15379
1247	Positive	1.045	520.987	Unknown	[M+H]+	null	null	null	null	3.255	0.00011187	1.19718
1248	Positive	9.683	431.351	Unknown	[M+H]+	null	null	null	null	0.28229	0.00011222	1.47389
1249	Positive	12.588	337.191	low score: catharanthine	[M+H]+	C21H24N2O2	Ibogan-type alkaloids	CMKFQVZJOWHHDV-YIILKADPSA-N	O=C(OC)C12C=3NC=4C=CC=CC4C3CCN5CC(C=C(CC)C51)C2	15.385	0.00011292	1.30051
1250	Positive	11.806	287.245	low score: NCGC00179862-03_C20H32O2_1-Naphthalenecarboxaldehyde, decahydro-5-[(3E)-5-hydroxy-3-methyl-3-penten-1-yl]-1,4a-dimethyl-6-methylene-, (1R,4aR,5S)-	[M-H2O+H]+	C20H32O2	Diterpenoids	FSLWKIHHQUNBQK-LDGRNEMHSA-N	C\C(CC[C@H]1C(=C)CCC2[C@@](C)(CCC[C@]12C)C=O)=C/CO	0.30782	0.00011292	1.5002
1251	Positive	9.552	480.352	Unknown	[M+H]+	null	null	null	null	0.34812	0.00011324	1.50901
1252	Positive	10.715	301.17	low score: 1-[4,5-bis(hydroxymethyl)-3-methoxy-2-methylphenoxy]-3-methylbutane-2,3-diol	[M+H]+	C15H24O6	Benzyl alcohols	MAQMWSUGBCIGLJ-UHFFFAOYSA-N	OCC1=CC(OCC(O)C(O)(C)C)=C(C(OC)=C1CO)C	0.45633	0.00011337	1.29186
1253	Positive	10.482	552.369	low score: (3S,10R,13R)-10,13-dimethyl-17-octyl-2,3,4,7,8,9,10,11,12,13,14,15,16,17-tetradecahydro-1H-cyclopenta[a]phenanthren-3-yl (4-nitrophenyl) carbonate	[M+H]+	C34H49NO5	Androstane steroids	AFNDTSIACJAGSO-ZNBDOVCMSA-N	O=C(OC1=CC=C(C=C1)[N+](=O)[O-])OC2CC3=CCC4C(CCC5(C)C(CCCCCCCC)CCC45)C3(C)CC2	25.989	0.00011373	1.60981
1254	Positive	12.664	331.308	low score: MMV687273	[M+H]+	C22H38N2	Monoterpenoids	JFIBVDBTCDTBRH-IDUWFGFVSA-N	C(=C(C)C)CCC(=CCNCCNC1C2CC3CC(C2)CC1C3)C	92.249	0.00011432	1.66018
1255	Positive	0.644	172.967	Unknown	[M+H]+	null	null	null	null	125.62	0.00011449	1.66541
1256	Positive	7.595	240.249	Unknown	[M+H]+	null	null	null	null	22.359	0.00011449	1.52509
1257	Positive	9.354	520.767	Unknown	[M+H]+	null	null	null	null	5.4922	0.00011449	1.43134
1258	Positive	2.105	205.105	no MS2: MMV393995	[M+H]+	C10H12N4O	Pyrimidones	XIFVEJXUSTTZKD-UHFFFAOYSA-N	OC=1N=C(N=C(C1)C)N2N=C(C=C2C)C	0.38116	0.00011449	1.34898
1259	Negative	6.743	599.239	Unknown	[M-H]-	null	null	null	null	0.09533	0.00011449	1.34426
1260	Negative	1.279	698.085	Unknown	[M-H]-	null	null	null	null	0.085051	0.00011547	1.2518
1261	Negative	1.269	682.113	Unknown	[M-H]-	null	null	null	null	0.095521	0.0001157	1.30468
1262	Positive	13.089	100.083	no MS2: 2-Piperidone; CE0; XUWHAWMETYGRKB-UHFFFAOYSA-N	[M+H]+	C5H9NO	Piperidinones	XUWHAWMETYGRKB-UHFFFAOYSA-N	C1CCN=C(C1)O	25.865	0.0001158	1.74842
1263	Positive	0.561	231.875	Unknown	[M+H]+	null	null	null	null	31.743	0.00011587	1.74999
1264	Positive	8.711	432.281	low score: NCGC00381130-01!methyl (2E,8E)-9-[3a-hydroxy-6,7-dimethyl-1-(2-methylpropyl)-3-oxo-2,4,7,7a-tetrahydro-1H-isoindol-4-yl]-4,5-dihydroxy-8-methylnona-2,8-dienoate [IIN-based on: CCMSLIB00000846918]	[M+NH4]+	C25H39NO6	Bicyclic monoterpenoids	YUXUTEAAGHFKKH-MKQCFFQWSA-N	COC(=O)\\C=C\\C(O)C(O)CC\\C(C)=C\\C1C=C(C)C(C)C2C(CC(C)C)NC(=O)C12O	0.20697	0.00011587	1.46954
1265	Positive	7.922	207.047	low score: 5-(1,2-dithiolan-3-yl)pentanoic acid	[M+H]+	C8H14O2S2	Lipoic acids and derivatives	AGBQKNBQESQNJD-UHFFFAOYSA-N	O=C(O)CCCCC1SSCC1	3.5624	0.000116	1.7432
1266	Positive	12.1	351.255	low score: NCGC00385642-01!1,4-dihydroxyheptadec-16-en-2-yl acetate [IIN-based on: CCMSLIB00000845027]	[M+Na]+	C19H36O4	Long-chain fatty alcohols	LUIGTZGBXWZJAX-UHFFFAOYSA-N	CC(=O)OC(CO)CC(O)CCCCCCCCCCCC=C	6.7281	0.0001163	1.32427
1267	Positive	17.701	659.546	Unknown	[M+H]+	null	null	null	null	0.25775	0.0001163	1.52307
1268	Positive	14.38	249.278	Unknown	[M+H]+	null	null	null	null	68.346	0.00011667	1.43292
1269	Positive	13.601	215.139	no MS2: DETHIOBIOTIN	[M+H]+	C10H18N2O3	Medium-chain fatty acids	AUTOLBMXDDTRRT-JGVFFNPUSA-N	C[C@H]1[C@H](NC(=O)N1)CCCCCC(=O)O	4.0427	0.00011667	1.77571
1270	Positive	6.408	377.241	low score: 5-[5-hydroxy-3-(hydroxymethyl)pentyl]-8a-(hydroxymethyl)-5,6-dimethyl-3,4,4a,6,7,8-hexahydronaphthalene-1-carboxylic acid	[M+Na]+	C20H34O5	Colensane and clerodane diterpenoids	VOCJFEUCJDTXSA-UHFFFAOYSA-N	O=C(O)C1=CCCC2C1(CO)CCC(C)C2(C)CCC(CO)CCO	11.894	0.00011667	1.68448
1271	Positive	9.439	592.272	no MS2: NCGC00347608-02_C30H38O11_7,11-Methano-2H,4H-oxireno[1,8]cycloocta[1,2-f][2]benzopyran-8-acetic acid, 4-(3-furanyl)dodecahydro-alpha,11-dihydroxy-4a,7,9,9-tetramethyl-2,13-dioxo-10-(1-oxopropoxy)-, methyl ester, (alphaR,4R,4aR,7S,8S,10S,11S,11aR,12aS)-	[M+NH4]+	C30H38O11	Limonoids	FZBGZDZLYSLJFE-MVAMGWTESA-N	CCC(=O)O[C@H]1C(C)(C)[C@H]([C@@H](O)C(=O)OC)[C@@]2(C)C3CC[C@]4(C)C(CC(=O)O[C@H]4C5=COC=C5)[C@]36O[C@@H]6[C@]1(O)C2=O	9.7202	0.00011667	1.48052
1272	Positive	8.516	521.917	Unknown	[M+H]+	null	null	null	null	5.5258	0.00011679	1.36122
1273	Positive	14.38	739.65	low score: (2E,6E)-3,7,11,15,19,23,27,31,35-nonamethylhexatriaconta-2,6,34-triene-1,11,15,19,23,27,31-heptol	[M+H]+	C45H86O7	Polyprenols	FPJJIWCMASJCHO-NXRGQNTBSA-N	OCC=C(C)CCC=C(C)CCCC(O)(C)CCCC(O)(C)CCCC(O)(C)CCCC(O)(C)CCCC(O)(C)CCCC(O)(C)CCC=C(C)C	177.12	0.00011762	1.53138
1274	Positive	0.074	419.346	no MS2: "(3R,5S,7R,9S,10S,12S,13R,14S,17R)-17-((2R)-7-hydroxy-6-methylheptan-2-yl)-10,13-dimethylhexadecahydro-1H-cyclopenta[a]phenanthrene-3,7,12-triol"	[M-H2O+H]+	C27H48O4	Tetrahydroxy bile acids, alcohols and derivatives	XJZGNVBLVFOSKJ-XZULNKEGSA-N	C[C@H](CCCC(C)CO)[C@H]1CC[C@H]2[C@]3([H])[C@H](O)C[C@@H]4C[C@H](O)CC[C@]4(C)[C@H]3C[C@H](O)[C@@]21C	0.29585	0.00011762	1.52538
1275	Positive	0.533	304.82	Unknown	[M+H]+	null	null	null	null	338.85	0.00011802	1.78115
1276	Positive	11.805	351.277	low score: NCGC00385006-01_C25H36O2_Dicyclopenta[a,d]cycloocten-3(3aH)-one, 7-[(2Z)-1,5-dimethyl-2,4-hexadien-1-yl]-6,6a,7,8,9,9a,10,10a-octahydro-4-(hydroxymethyl)-1,9a-dimethyl-, (4E,6aS,7R,9aR,10aS)-	[M-H2O+H]+	C25H36O2	Ophiobolane sesterterpenoids	GUXDHNIKRQCWIE-WMZUYDDLSA-N	C[C@@H](\C=C/C=C(C)C)[C@H]1CC[C@]2(C)C[C@H]\3C(C(=O)\C=C3C)\C(=C/C[C@@H]12)CO	0.28853	0.00011802	1.52119
1277	Positive	0.443	247.938	Unknown	[M+H]+	null	null	null	null	32.555	0.00011852	1.54048
1278	Positive	0.425	105.962	Unknown	[M+H]+	null	null	null	null	26.588	0.00011887	1.37943
1279	Positive	17.623	518.5	Unknown	[M+H]+	null	null	null	null	0.33532	0.00011943	1.38453
1280	Positive	8.975	498.713	no MS2: (NAG)(NAM)-AqKG[3-NH2-d]	[M+2H]2+	C39H65N9O21	Oligopeptides	GKVRBFMDGFUHPX-UHFFFAOYSA-N	CC(=O)NC1C(OC2C(CO)OC(O)C(NC(C)=O)C2OC(C)C(=O)NC(C)C(=O)NC(CCC(=O)NC(CCCCNC(=O)CC(N)C(=O)O)C(=O)NCC(=O)O)C(N)=O)OC(CO)C(O)C1O	8.6634	0.00011998	1.41099
1281	Positive	14.046	100.082	no MS2: 2-Piperidone; CE0; XUWHAWMETYGRKB-UHFFFAOYSA-N	[M+H]+	C5H9NO	Piperidinones	XUWHAWMETYGRKB-UHFFFAOYSA-N	C1CCN=C(C1)O	28.763	0.00012075	1.74126
1282	Positive	10.285	548.41	Unknown	[M+H]+	null	null	null	null	0.34258	0.00012113	1.60967
1283	Positive	9.006	497.192	no MS2: 2,7,7,11,15,17-hexamethyl-18-methylidene-5,13,16-trioxo-6,14-dioxatetracyclo[9.8.0.0?,?.0??,??]nonadec-3-en-10-yl acetate	[M+K]+	C26H34O7	Naphthopyrans	JFYYCQXZVIOBKU-UHFFFAOYSA-N	O=C1OC(C)(C)C2CC(OC(=O)C)C3(C)C4C(=O)OC(C(=O)C4(C(=C)CC3C2(C=C1)C)C)C	8.6791	0.00012158	1.59377
1284	Positive	10.449	524.98	Unknown	[M+H]+	null	null	null	null	12.002	0.00012211	1.31825
1285	Positive	1.808	205.105	low score: Tryptophan	[M+H]+	C11H12N2O2	Indolyl carboxylic acids and derivatives	QIVBCDIJIAJPQS-UHFFFAOYSA-N	O=C(O)C(N)CC1=CNC=2C=CC=CC21	0.39767	0.00012211	1.27139
1286	Positive	12.62	157.096	no MS2: Unknown (carbon number 8); PlaSMA ID-276	[M+H]+	C8H12O3	Unknown	null	null	4.0399	0.0001224	1.51186
1287	Positive	0.426	145.965	Unknown	[M+H]+	null	null	null	null	76.543	0.00012286	1.39401
1288	Positive	0.763	283.847	Unknown	[M+H]+	null	null	null	null	129.14	0.00012286	1.76654
1289	Positive	13.478	298.297	low score: Tridemorph	[M+H]+	C19H39NO	Morpholines	YTOPFCCWCSOHFV-UHFFFAOYSA-N	CCCCCCCCCCCCCN(C1)CC(C)OC(C)1	0.26409	0.00012286	1.71301
1290	Positive	13.353	691.592	Unknown	[M+H]+	null	null	null	null	0.27015	0.00012286	1.64347
1291	Positive	14.253	453.362	no MS2: "(3R,5R,7R,8S,9S,10S,12S,13R,14S,17R)-17-((R)-7-hydroxy-6-(hydroxymethyl)heptan-2-yl)-10,13-dimethylhexadecahydro-1H-cyclopenta[a]phenanthrene-3,7,12-triol"	[M+H]+	C27H48O5	Tetrahydroxy bile acids, alcohols and derivatives	JNMALBXXJSWZQY-JOICSPLZSA-N	C[C@@H]([C@H]1CC[C@]2([H])[C@]1(C)[C@@H](O)C[C@@]3([H])[C@]2([H])[C@H](O)C[C@]4([H])[C@]3(C)CC[C@@H](O)C4)CCCC(CO)CO	0.25002	0.00012292	1.37211
1292	Positive	7.143	100.083	no MS2: 2-Piperidone; CE0; XUWHAWMETYGRKB-UHFFFAOYSA-N	[M+H]+	C5H9NO	Piperidinones	XUWHAWMETYGRKB-UHFFFAOYSA-N	C1CCN=C(C1)O	13.796	0.00012329	1.65439
1293	Positive	1.065	725.896	Unknown	[M+H]+	null	null	null	null	3.7501	0.00012535	1.19442
1294	Positive	9.112	592.277	no MS2: NCGC00347608-02_C30H38O11_7,11-Methano-2H,4H-oxireno[1,8]cycloocta[1,2-f][2]benzopyran-8-acetic acid, 4-(3-furanyl)dodecahydro-alpha,11-dihydroxy-4a,7,9,9-tetramethyl-2,13-dioxo-10-(1-oxopropoxy)-, methyl ester, (alphaR,4R,4aR,7S,8S,10S,11S,11aR,12aS)-	[M+NH4]+	C30H38O11	Limonoids	FZBGZDZLYSLJFE-MVAMGWTESA-N	CCC(=O)O[C@H]1C(C)(C)[C@H]([C@@H](O)C(=O)OC)[C@@]2(C)C3CC[C@]4(C)C(CC(=O)O[C@H]4C5=COC=C5)[C@]36O[C@@H]6[C@]1(O)C2=O	20.306	0.00012535	1.53739
1295	Positive	8.989	496.276	low score: 6-Benzoylheteratisine	[M+H]+	C29H37NO6	Benzoic acid esters	XVVZJDDPRFFKTQ-MFJRHRAESA-N	CCN1C[C@]2(C)CC[C@H](OC)[C@]34C5C[C@@H]6CC[C@@](O)(C5C(=O)O6)[C@H](C13)[C@@H](OC(=O)c1ccccc1)C42	4.3912	0.00012574	1.37467
1296	Positive	11.049	279.185	low score: (6E)-2,6,10-trimethyldodeca-6,11-diene-2,3,10-triol_major	[M+Na]+	C15H28O3	Sesquiterpenoids	BGUYVWYUIXKRDO-XYOKQWHBSA-N	C=CC(C)(O)CCC=C(C)CCC(O)C(C)(C)O	0.39652	0.00012582	1.26566
1297	Positive	8.538	636.276	no MS2: (NAG)(anMUR)-Aq	[M+ACN+H]+	C25H41N5O14	Dipeptides	XUEWAMZWAWHUPZ-UHFFFAOYSA-N	CC(=O)NC1C(OC2C3COC(O3)C(N)C2OC(C)C(=O)NC(C)C(=O)NC(CCC(=O)O)C(N)=O)OC(CO)C(O)C1O	7.6482	0.00012642	1.67181
1298	Negative	1.276	686.106	Unknown	[M-H]-	null	null	null	null	0.10094	0.00012667	1.44995
1299	Positive	8.553	609.274	low score: Reserpine	[M+H]+	C33H40N2O9	Yohimbine alkaloids	QEVHRUUCFGRFIF-UHFFFAOYSA-N	c(C6([H])[H])(c12)c(C(N(C6([H])[H])5)(C(C([H])(C([H])3C(=O)OC([H])([H])[H])C([H])(C5([H])[H])C(C(OC(=O)c(c4[H])c(c(OC([H])([H])[H])c(c(OC([H])([H])[H])4)OC([H])([H])[H])[H])([H])C3(OC([H])([H])[H])[H])([H])[H])([H])[H])[H])n(c1c([H])c(c(c([H])2)[H])OC([H])([H])[H])[H]	19.041	0.00012729	1.62762
1300	Positive	12.447	427.336	low score: 5Alpha-Cholestanol	[M+K]+	C27H48O	Cholesterols and derivatives	QYIXCDOBOSTCEI-QCYZZNICSA-N	OC1CCC2(C)C(CCC3C4CCC(C(C)CCCC(C)C)C4(C)CCC32)C1	0.31087	0.00012741	1.57103
1301	Positive	13.417	376.366	Unknown	[M+H]+	null	null	null	null	0.28559	0.00012795	1.70158
1302	Positive	8.541	594.309	low score: Ergocristam	[M+H]+	C35H39N5O4	Ergopeptams	KMDKLWZQLMBIBS-HVWSGMRBSA-N	CC(C)[C@@H](C(=O)N1[C@H](C(=O)N2CCC[C@@H]2C1=O)CC3=CC=CC=C3)NC(=O)[C@H]4CN([C@@H]5CC6=CNC7=CC=CC(=C67)C5=C4)C	26.363	0.00012828	1.32797
1303	Positive	0.418	462.183	no MS2: Morphine_3_Glucuronide	[M+H]+	C23H27NO9	Morphinans	WAEXKFONHRHFBZ-UHFFFAOYSA-N	[H]OC(=O)C([H])(O1)C([H])(O[H])C([H])(O[H])C([H])(O[H])C([H])(Oc(c([H])6)c(O5)c(c(c([H])6)2)C(C([H])([H])3)(C([H])54)C([H])(C([H])=C([H])C([H])(O[H])4)C([H])(N(C([H])([H])[H])C([H])([H])3)C([H])([H])2)1	0.3879	0.00012828	1.40296
1304	Positive	1.122	814.721	Unknown	[M+H]+	null	null	null	null	4.0573	0.00012828	1.25321
1305	Positive	0.441	199.086	low score: Azobenzol	[M+H]+	C12H10N2O	Benzene and substituted derivatives	GAUZCKBSTZFWCT-UHFFFAOYSA-N	c1(\[N+](=N\c2ccccc2)[O-])ccccc1	6.6841	0.00012958	1.36746
1306	Positive	1.7	136.942	Unknown	[M+H]+	null	null	null	null	2.302	0.0001307	1.35602
1307	Positive	10.496	646.327	Aconitine	[M+H]+	C34H47NO11	Aconitane-type diterpenoid alkaloids	XFSBVAOIAHNAPC-HLBYDYOGSA-N	O=C(OC1C2C3CC1(O)C(OC)C(O)C2(OC(=O)C)C4C(OC)C5C6(COC)CN(CC)C4C35C(OC)CC6O)C=7C=CC=CC7	61.715	0.0001312	1.58775
1308	Positive	0.436	310.881	Unknown	[M+H]+	null	null	null	null	17.799	0.00013157	1.35768
1309	Positive	14.304	739.658	low score: (2E,6E)-3,7,11,15,19,23,27,31,35-nonamethylhexatriaconta-2,6,34-triene-1,11,15,19,23,27,31-heptol	[M+H]+	C45H86O7	Polyprenols	FPJJIWCMASJCHO-NXRGQNTBSA-N	OCC=C(C)CCC=C(C)CCCC(O)(C)CCCC(O)(C)CCCC(O)(C)CCCC(O)(C)CCCC(O)(C)CCCC(O)(C)CCC=C(C)C	200.18	0.00013354	1.49316
1310	Positive	13.212	311.189	low score: (5S)-10,13-dimethyldodecahydro-1H-cyclopenta[a]phenanthrene-3,17(2H,4H)-dione	[M+Na]+	C19H28O2	Androgens and derivatives	RAJWOBJTTGJROA-PLFHKJOISA-N	O=C1CCC2(C)C(C1)CCC3C4CCC(=O)C4(C)CCC32	0.3091	0.00013392	1.71318
1311	Negative	6.711	653.169	low score: 6-hydroxy-3-[3-hydroxy-4-[3,4,5-trihydroxy-6-[[3,4,5-trihydroxy-6-(hydroxymethyl)oxan-2-yl]oxymethyl]oxan-2-yl]oxyphenyl]-5,7-dimethoxychromen-4-one	[M-H]-	C29H34O17	Isoflavonoid O-glycosides	KHCREUNEQGORAM-UHFFFAOYSA-N	O=C1C(=COC2=CC(OC)=C(O)C(OC)=C12)C=3C=CC(OC4OC(COC5OC(CO)C(O)C(O)C5O)C(O)C(O)C4O)=C(O)C3	0.11156	0.00013499	1.26593
1312	Positive	12.664	257.266	Unknown	[M+H]+	null	null	null	null	2.7521	0.00013546	1.50428
1313	Positive	6.543	100.084	no MS2: 2-Piperidone; CE0; XUWHAWMETYGRKB-UHFFFAOYSA-N	[M+H]+	C5H9NO	Piperidinones	XUWHAWMETYGRKB-UHFFFAOYSA-N	C1CCN=C(C1)O	11.164	0.00013599	1.69699
1314	Positive	0.476	243.846	Unknown	[M+H]+	null	null	null	null	61.155	0.00013601	1.77535
1315	Positive	10.178	488.402	low score: Tricaprylin (C8:0)	[M+NH4]+	C27H50O6	Triacylglycerols	VLPFTAMPNXLGLX-UHFFFAOYSA-N	CCCCCCCC(=O)OCC(COC(=O)CCCCCCC)OC(=O)CCCCCCC	0.25816	0.00013667	1.53572
1316	Positive	10.816	124.096	HISTIDINOL	[M-H2O+H]+	C6H11N3O	Aralkylamines	ZQISRDCJNBUVMM-YFKPBYRVSA-N	N[C@H](CO)CC1=CN=CN1	3.5337	0.00013834	1.55464
1317	Positive	0.382	175.121	Arginine	[M+H]+	C6H14N4O2	L-alpha-amino acids	ODKSFYDXXFIFQN-UHFFFAOYSA-N	C(CC(C(=O)O)N)CN=C(N)N	4.9737	0.00013834	1.7301
1318	Positive	14.38	267.286	Unknown	[M+H]+	null	null	null	null	339.68	0.00013858	1.4296
1319	Positive	10.488	223.082	no MS2: 2-methylanthra-9,10-quinone	[M+H]+	C15H10O2	Anthraquinones	NJWGQARXZDRHCD-UHFFFAOYSA-N	O=C1C=2C=CC=CC2C(=O)C3=CC(=CC=C13)C	4.5303	0.00013863	1.72671
1320	Positive	0.638	225.015	low score: 4-hydroxy-7H-furo[3,2-g]chromen-7-one	[M+Na]+	C11H6O4	5-hydroxypsoralens	GIJHDGJRTUSBJR-UHFFFAOYSA-N	O=C1OC=2C=C3OC=CC3=C(O)C2C=C1	11.337	0.00013913	1.37443
1321	Positive	1.024	189.172	Unknown	[M+H]+	null	null	null	null	0.34458	0.00013984	1.64907
1322	Positive	0.425	378.847	Unknown	[M+H]+	null	null	null	null	24.953	0.00013988	1.50972
1323	Positive	8.382	279.185	low score: (6E)-2,6,10-trimethyldodeca-6,11-diene-2,3,10-triol_49.3%	[M+Na]+	C15H28O3	Sesquiterpenoids	BGUYVWYUIXKRDO-XYOKQWHBSA-N	C=CC(C)(O)CCC=C(C)CCC(O)C(C)(C)O	0.40423	0.00014049	1.20273
1324	Positive	14.811	369.403	Unknown	[M+H]+	null	null	null	null	19.983	0.00014051	1.24236
1325	Positive	13.419	455.365	Unknown	[M+H]+	null	null	null	null	19.781	0.00014082	1.59604
1326	Positive	0.431	246.881	Unknown	[M+H]+	null	null	null	null	86.5	0.00014086	1.63612
1327	Positive	8.955	562.399	Unknown	[M+H]+	null	null	null	null	0.30494	0.00014094	1.3719
1328	Positive	15.356	557.46	low score: (4R)-5',6a,8a,9-tetramethyldocosahydrospiro[naphtho[2',1':4,5]indeno[2,1-b]furan-10,2'-pyran]-4-yl nonanoate	[M+H]+	C36H60O4	Triterpenoids	BVMVRPVYRJQROP-XYUNULTHSA-N	O=C(OC1CCC2(C)C(CCC3C2CCC4(C)C3CC5OC6(OCC(C)CC6)C(C)C54)C1)CCCCCCCC	0.24113	0.00014216	1.44427
1329	Positive	14.301	387.307	low score: Bourgeanic acid	[M+H]+	C22H42O5	3-(3-hydroxyalkanoyloxy)alkanoic acids	ZQEUMOKDJCSNHB-IHRHECOVSA-N	CC[C@@H](C)C[C@@H](C)[C@@H]([C@H](C)C(=O)O[C@@H]([C@H](C)C[C@H](C)CC)[C@H](C)C(=O)O)O	26.029	0.0001424	1.31725
1330	Positive	13.438	379.313	conessine	[M+Na]+	C24H40N2	Conanine-type alkaloids	GPLGAQQQNWMVMM-CYFNKAHPSA-N	C1=C2CC(N(C)C)CCC2(C)C3CCC45CN(C)C(C)C5CCC4C3C1	0.27206	0.00014246	1.53418
1331	Positive	0.456	258.888	Unknown	[M+H]+	null	null	null	null	21.547	0.00014273	1.04703
1332	Positive	9.658	504.379	Unknown	[M+H]+	null	null	null	null	0.29878	0.00014318	1.62271
1333	Positive	12.51	348.337	Unknown	[M+H]+	null	null	null	null	18.453	0.00014331	1.501
1334	Positive	6.514	405.239	low score: Hydrocortisonacetate	[M+H]+	C23H32O6	Gluco/mineralocorticoids, progestogins and derivatives	ALEXXDVDDISNDU-JZYPGELDSA-N	CC(=O)OCC(=O)[C@@]1(O)CC[C@H]2[C@@H]3CCC4=CC(=O)CC[C@]4(C)[C@H]3[C@@H](O)C[C@]12C	2.971	0.00014372	1.28107
1335	Positive	8.617	597.344	Unknown	[M+H]+	null	null	null	null	5.4387	0.00014372	1.18244
1336	Positive	0.436	267.905	Unknown	[M+H]+	null	null	null	null	21.225	0.0001449	1.62681
1337	Positive	0.547	246.906	Unknown	[M+H]+	null	null	null	null	13.264	0.0001469	1.27015
1338	Positive	1.182	599.446	low score: Daucosterol;Sitogluside	[M+Na]+	C35H60O6	Stigmastanes and derivatives	NPJICTMALKLTFW-OFUAXYCQSA-N	OCC1OC(OC2CC3=CCC4C(CCC5(C)C(CCC45)C(C)CCC(CC)C(C)C)C3(C)CC2)C(O)C(O)C1O	0.28922	0.0001469	1.49488
1339	Positive	14.179	100.084	no MS2: 2-Piperidone; CE0; XUWHAWMETYGRKB-UHFFFAOYSA-N	[M+H]+	C5H9NO	Piperidinones	XUWHAWMETYGRKB-UHFFFAOYSA-N	C1CCN=C(C1)O	26.536	0.00014746	1.72844
1340	Positive	9.274	554.445	low score: NCGC00384949-01!2-(hydroxymethyl)-6-(2,20,21-trihydroxydocosan-3-yloxy)oxane-3,4,5-triol	[M+NH4]+	C28H56O9	Fatty acyl glycosides of mono- and disaccharides	IKQSIKPOUMLPKK-UHFFFAOYSA-N	CC(O)C(O)CCCCCCCCCCCCCCCCC(OC1OC(CO)C(O)C(O)C1O)C(C)O	0.2874	0.00014746	1.40979
1341	Positive	7.84	279.185	no MS2: NCGC00385848-01_C19H24N2O_(3alpha,14alpha,16alpha)-14,15-Dihydroeburnamenin-14-ol	[M-H2O+H]+	C19H24N2O	Eburnan-type alkaloids	HONLKDDLTAZVQV-UHFFFAOYSA-N	CCC12CCCN3CCC4=C(C13)[N](C(O)C2)C5=CC=CC=C45	0.40577	0.00014854	1.21197
1342	Positive	0.745	267.851	Unknown	[M+H]+	null	null	null	null	70.733	0.00014925	1.59176
1343	Positive	18.376	663.499	Unknown	[M+H]+	null	null	null	null	3.45	0.00014925	1.46398
1344	Positive	1.108	314.204	no MS2: Heliotrine	[M+H]+	C16H27NO5	Alkaloids and derivatives	LMFKRLGHEKVMNT-UJDVCPFMSA-N	CC(C)C(C(C)OC)(C(=O)OCC1=CCN2C1C(CC2)O)O	0.29652	0.00014925	1.21563
1345	Positive	1.147	207.028	low score: Methyl gallate	[M+Na]+	C8H8O5	Galloyl esters	FBSFWRHWHYMIOG-UHFFFAOYSA-N	O=C(OC)C1=CC(O)=C(O)C(O)=C1	2.8237	0.00014926	1.05124
1346	Positive	1.638	100.083	N-Methyl-2-pyrrolidone	[M+H]+	C5H9NO	N-alkylpyrrolidines	SECXISVLQFMRJM-UHFFFAOYSA-N	CN1CCCC1=O	11.007	0.00014939	1.61825
1347	Positive	1.035	802.773	Unknown	[M+H]+	null	null	null	null	8.0818	0.00014946	1.4758
1348	Positive	14.356	397.302	low score: Unknown (carbon number 27); PlaSMA ID-2179	[M+H]+	C27H40O2	Unknown	null	null	55.126	0.0001505	1.30955
1349	Positive	0.427	141.01	low score: CYCLOSERINE	[M+K]+	C3H6N2O2	Alpha amino acids and derivatives	DYDCUQKUCUHJBH-UWTATZPHSA-N	OC1=NOCC1N	10.164	0.00015162	1.28911
1350	Positive	0.519	172.966	Unknown	[M+H]+	null	null	null	null	141.28	0.00015162	1.63774
1351	Positive	8.124	295.144	low score: 11-(phenylcarbonyl)-7,11-diazatricyclo[7.3.1.0<2,7>]trideca-2,4-dien-6-one	[M+H]+	C18H18N2O2	N-benzoylpiperidines	HODDQHCNQOBZKP-UHFFFAOYSA-N	C1C2CN(CC1C3=CC=CC(=O)N3C2)C(=O)C4=CC=CC=C4	0.21785	0.00015162	1.56823
1352	Positive	13.303	578.463	Unknown	[M+H]+	null	null	null	null	0.30421	0.00015205	1.50552
1353	Positive	16.089	409.358	low score: cholest-5-en-3-ol	[M+Na]+	C27H46O	Cholesterols and derivatives	HVYWMOMLDIMFJA-RQOOZVDESA-N	OC1CC2=CCC3C(CCC4(C)C(CCC34)C(C)CCCC(C)C)C2(C)CC1	8.0286	0.00015243	1.27462
1354	Positive	8.125	119.094	Unknown	[M+H]+	null	null	null	null	0.34733	0.00015305	1.44552
1355	Positive	9.155	476.314	Unknown	[M+H]+	null	null	null	null	0.34943	0.00015311	1.58042
1356	Positive	9.084	239.181	Unknown	[M+H]+	null	null	null	null	0.45645	0.00015311	1.22971
1357	Positive	0.426	226.876	Unknown	[M+H]+	null	null	null	null	40.004	0.00015427	1.61931
1358	Positive	14.377	100.083	no MS2: 2-Piperidone; CE0; XUWHAWMETYGRKB-UHFFFAOYSA-N	[M+H]+	C5H9NO	Piperidinones	XUWHAWMETYGRKB-UHFFFAOYSA-N	C1CCN=C(C1)O	25.217	0.00015442	1.69997
1359	Positive	13.418	415.373	Unknown	[M+H]+	null	null	null	null	62.362	0.00015442	1.62504
1360	Positive	8.546	596.305	low score: Chymostatinol A	[M+H]+	C30H41N7O6	Peptides	KUKQXNQRXXTUEM-UHFFFAOYSA-N	N=C(NCC1)NC1C(NC(NC(CC2=CC=CC=C2)C(O)=O)=O)C(NC(C(C)C)C(NC(CO)CC3=CC=CC=C3)=O)=O	14.445	0.00015442	1.4484
1361	Positive	8.576	621.342	low score: NCGC00381318-01![3-methyl-1-[3-methyl-1-[3-methyl-1-oxo-1-(2,3,4,5,6-pentahydroxyhexoxy)pentan-2-yl]oxy-1-oxopentan-2-yl]oxy-1-oxopentan-2-yl] 2-hydroxy-3-methylpentanoate [IIN-based on: CCMSLIB00000845116]	[M-H2O+H]+	C30H54O14	Depsipeptides	XHFZCGJKWBSHAG-UHFFFAOYSA-N	CCC(C)C(O)C(=O)OC(C(C)CC)C(=O)OC(C(C)CC)C(=O)OC(C(C)CC)C(=O)OCC(O)C(O)C(O)C(O)CO	5.4098	0.00015442	1.5682
1362	Positive	17.31	367.35	low score: Nervonic Acid	[M+H]+	C24H46O2	Very long-chain fatty acids	GWHCXVQVJPWHRF-KTKRTIGZSA-N	O=C(O)CCCCCCCCCCCCCC=CCCCCCCCC	0.25771	0.00015442	1.53994
1363	Positive	6.907	100.083	no MS2: 2-Piperidone; CE0; XUWHAWMETYGRKB-UHFFFAOYSA-N	[M+H]+	C5H9NO	Piperidinones	XUWHAWMETYGRKB-UHFFFAOYSA-N	C1CCN=C(C1)O	12.215	0.00015458	1.69643
1364	Positive	9.109	279.185	low score: (6E)-2,6,10-trimethyldodeca-6,11-diene-2,3,10-triol_major	[M+Na]+	C15H28O3	Sesquiterpenoids	BGUYVWYUIXKRDO-XYOKQWHBSA-N	C=CC(C)(O)CCC=C(C)CCC(O)C(C)(C)O	0.4129	0.00015458	1.2365
1365	Negative	6.746	626.151	Unknown	[M-H]-	null	null	null	null	0.11542	0.0001547	1.33283
1366	Positive	9.65	520.762	Unknown	[M+H]+	null	null	null	null	0.31085	0.00015486	1.30188
1367	Positive	1.74	100.083	N-Methyl-2-pyrrolidone	[M+H]+	C5H9NO	N-alkylpyrrolidines	SECXISVLQFMRJM-UHFFFAOYSA-N	CN1CCCC1=O	11.02	0.0001554	1.63442
1368	Positive	14.337	223.079	no MS2: 2-methylanthra-9,10-quinone	[M+H+Na]2+	C15H10O2	Anthraquinones	NJWGQARXZDRHCD-UHFFFAOYSA-N	O=C1C=2C=CC=CC2C(=O)C3=CC(=CC=C13)C	7.7486	0.00015568	1.33015
1369	Positive	9.078	618.291	Unknown	[M+H]+	null	null	null	null	7.2461	0.00015648	1.36008
1370	Positive	11.207	478.368	low score: "((4R)-4-((3R,5S,7R,9S,10S,13R,14S,17R)-3,7-dihydroxy-10,13-dimethylhexadecahydro-1H-cyclopenta[a]phenanthren-17-yl)-2,2-dimethylpentanoyl)glycine"	[M+H]+	C28H47NO5	Glycinated bile acids and derivatives	HQPHGZUTNNVZLH-BOWXQMHNSA-N	[H][C@@]12[C@@H](O)C[C@@H]3C[C@H](O)CC[C@]3(C)[C@H]1CC[C@@]4(C)[C@H]2CC[C@@H]4[C@@H](CC(C)(C)C(NCC(O)=O)=O)C	0.19397	0.00015743	1.38018
1371	Positive	0.425	285.866	Unknown	[M+H]+	null	null	null	null	42.529	0.00015816	1.58101
1372	Positive	10.785	312.349	Unknown	[M+H]+	null	null	null	null	0.26401	0.00015816	1.52949
1373	Positive	13.417	686.622	Unknown	[M+H]+	null	null	null	null	0.30102	0.00015816	1.55243
1374	Positive	16.94	702.261	Unknown	[M+H]+	null	null	null	null	68.764	0.00015817	1.57169
1375	Positive	0.61	244.909	Unknown	[M+H]+	null	null	null	null	13.265	0.00015871	1.12415
1376	Negative	1.094	518.67	Unknown	[M-H]-	null	null	null	null	0.41389	0.00015871	1.16208
1377	Positive	9.384	402.396	Unknown	[M+H]+	null	null	null	null	0.31203	0.00016011	1.28724
1378	Positive	0.423	289.911	Unknown	[M+H]+	null	null	null	null	12.962	0.00016023	1.28647
1379	Positive	9.026	585.27	low score: (1R,3aR,3bS,4aR,6S,7S,7aR,8R,8aR,9aR)-1,4a,8-tris(acetyloxy)-2,2,3b,6,8a-pentamethyl-4,9-dioxo-tetradecahydro-1H-cyclopenta[a]s-indacen-7-yl butanoate	[M+Na]+	C30H42O10	Diterpenoids	JQCBBCVOQHOGTI-HROOPKDASA-N	O=C(OC1C2C(=O)C3(C)C(OC(=O)C)C4C(OC(=O)CCC)C(C)CC4(OC(=O)C)C(=O)C3(C)C2CC1(C)C)C	30.658	0.00016063	1.64954
1380	Positive	10.171	546.391	Unknown	[M+H]+	null	null	null	null	10.521	0.00016103	1.53092
1381	Positive	8.9	476.308	low score: 4-((9S)-3,5,14-trihydroxy-10-((E)-((1-hydroxybutan-2-yl)imino)methyl)-13-methylhexadecahydro-1H-cyclopenta[a]phenanthren-17-yl)furan-2(5H)-one	[M+2Na-H]+	C27H41NO6	Cardenolides and derivatives	ASLHXRONSASUAK-FNNAZMBNSA-N	O=C1OCC(=C1)C2CCC3(O)C4CCC5(O)CC(O)CCC5(C=NC(CO)CC)C4CCC23C	7.1664	0.00016117	1.58334
1382	Positive	1.194	798.472	no MS2: Gitoxin_major	[M+NH4]+	C41H64O14	Cardenolide glycosides and derivatives	LKRDZKPBAOKJBT-CNPIRKNPSA-N	CC1OC(OC2C(O)CC(OC3C(O)CC(OC4CCC5(C)C(CCC6C5CCC5(C)C(C7=CC(=O)OC7)C(O)CC65O)C4)OC3C)OC2C)CC(O)C1O	11.257	0.0001619	1.32403
1383	Positive	1.166	279.179	low score: Bakuchiol	[M+Na]+	C18H24O	Aromatic monoterpenoids	LFYJSSARVMHQJB-QIXNEVBVSA-N	OC1=CC=C(C=C1)C=CC(C=C)(C)CCC=C(C)C	0.41385	0.00016379	1.38248
1384	Positive	0.436	261.89	Unknown	[M+H]+	null	null	null	null	34.673	0.00016438	1.11876
1385	Positive	0.628	166.909	Unknown	[M+H]+	null	null	null	null	27.838	0.00016454	1.64167
1386	Negative	1.509	371.14	low score: Arctigenin	[M-H]-	C21H24O6	Dibenzylbutyrolactone lignans	NQWVSMVXKMHKTF-UHFFFAOYNA-N	COC1=C(OC)C=C(CC2COC(=O)C2CC2=CC(OC)=C(O)C=C2)C=C1	0.47188	0.00016485	1.5723
1387	Positive	17.824	536.211	no MS2: (NAG)(DAM)-AelAA	[M+2H]2+	C41H66N8O23S	Polypeptides	NOQRDLSNYZOTLA-UHFFFAOYSA-N	CC(=O)NC1C(OC2C(COC(C)=O)OC(O)C(NC(C)=O)C2OC(C)C(=O)NC(C)C(=O)NC(CCC(=O)NC(CSCC(N)C(=O)O)C(=O)NC(C)C(=O)NC(C)C(=O)O)C(=O)O)OC(CO)C(O)C1O	0.43765	0.00016488	1.10078
1388	Positive	15.968	312.348	Unknown	[M+H]+	null	null	null	null	11.898	0.00016578	1.5422
1389	Positive	7.859	293.128	low score: 1-allyl-2-hydroxy-7,8,9,10-tetrahydroazepino[2,1-b]quinazolin-12(6H)-one	[M+Na]+	C16H18N2O2	Quinazolines	NYOGAOMLDBVPKF-UHFFFAOYSA-N	O=C1C2=C(N=C3N1CCCCC3)C=CC(O)=C2CC=C	7.702	0.00016578	1.16614
1390	Positive	6.207	407.219	low score: Lincomycin	[M+2Na-H]+	C18H34N2O6S	Proline and derivatives	OJMMVQQUTAEWLP-UHFFFAOYSA-N	CCCC1CC(N(C1)C)C(=O)NC(C2C(C(C(C(O2)SC)O)O)O)C(C)O	4.2147	0.00016718	1.24028
1391	Positive	1.332	519.171	low score: Sibiricose A5	[M+H]+	C22H30O14	Coumaric acids and derivatives	ZPEADZHVGOCGKH-QIWADDKASA-N	O=C(OC1C(O)C(OC1(OC2OC(CO)C(O)C(O)C2O)CO)CO)C=CC3=CC=C(O)C(OC)=C3	20.526	0.0001684	1.60071
1392	Positive	12.504	312.325	Unknown	[M+H]+	null	null	null	null	14.667	0.00016921	1.25534
1393	Positive	0.432	126.976	Unknown	[M+H]+	null	null	null	null	109.92	0.00016973	1.48193
1394	Positive	1.035	800.778	Unknown	[M+H]+	null	null	null	null	24.896	0.00016973	1.52832
1395	Positive	1.037	994.728	Unknown	[M+H]+	null	null	null	null	16.764	0.00016973	1.36503
1396	Positive	0.461	247.842	Unknown	[M+H]+	null	null	null	null	44.506	0.00017022	1.51495
1397	Positive	9.882	544.38	Unknown	[M+H]+	null	null	null	null	0.41471	0.0001706	1.26607
1398	Positive	0.443	312.881	Unknown	[M+H]+	null	null	null	null	38.573	0.00017076	1.36875
1399	Positive	10.484	598.338	Unknown	[M+H]+	null	null	null	null	16.951	0.00017166	1.41033
1400	Positive	12.129	530.386	Unknown	[M+H]+	null	null	null	null	0.23484	0.00017288	1.34712
1401	Positive	1.01	702.918	Unknown	[M+H]+	null	null	null	null	17.363	0.00017308	1.62433
1402	Positive	0.661	100.084	no MS2: 2-Piperidone; CE0; XUWHAWMETYGRKB-UHFFFAOYSA-N	[M+H]+	C5H9NO	Piperidinones	XUWHAWMETYGRKB-UHFFFAOYSA-N	C1CCN=C(C1)O	8.6671	0.00017372	1.66321
1403	Negative	12.059	283.23	low score: 16-Heptadecyne-1,2,4-triol	[M-H]-	C17H32O3	Long-chain fatty alcohols	OHLQBKZXSJYBMK-UHFFFAOYSA-N	C#CCCCCCCCCCCCC(O)CC(O)CO	2.7104	0.00017372	1.18145
1404	Positive	14.321	310.332	Unknown	[M+H]+	null	null	null	null	98.64	0.00017409	1.66706
1405	Positive	2.073	279.183	no MS2: NCGC00385848-01_C19H24N2O_(3alpha,14alpha,16alpha)-14,15-Dihydroeburnamenin-14-ol	[M-H2O+H]+	C19H24N2O	Eburnan-type alkaloids	HONLKDDLTAZVQV-UHFFFAOYSA-N	CCC12CCCN3CCC4=C(C13)[N](C(O)C2)C5=CC=CC=C45	0.37203	0.00017478	1.28521
1406	Positive	0.431	279.879	Unknown	[M+H]+	null	null	null	null	87.31	0.00017524	1.48899
1407	Positive	0.441	366.796	Unknown	[M+H]+	null	null	null	null	78.675	0.00017611	1.05573
1408	Positive	8.615	728.282	low score: N-((7S)-10-(((2S)-1-(2-(2,4-dimethoxyphenyl)pyrrolidin-1-yl)-4-(methylthio)-1-oxobutan-2-yl)amino)-1,2,3-trimethoxy-9-oxo-5,6,7,9-tetrahydrobenzo[a]heptalen-7-yl)acetamide	[M+Na]+	C38H47N3O8S	Methionine and derivatives	ULRPKNXAJVTGHF-GRMXABTLSA-N	O=C1C=C2C(=CC=C1NC(C(=O)N3CCCC3C4=CC=C(OC)C=C4OC)CCSC)C5=C(OC)C(OC)=C(OC)C=C5CCC2NC(=O)C	30.941	0.00017667	1.46847
1409	Positive	0.365	273.187	low score: Galaxolidone	[M+H]+	C18H24O2	2-benzopyrans	PGMHPYRIXBRRQD-UHFFFAOYSA-N	CC2(C)c1cc3C(=O)OCC(C)c3cc1C(C)(C)C2C	5.4476	0.00017691	1.40618
1410	Positive	1.264	421.105	no MS2: NCGC00168932-02_C18H22O10_5-Benzofuranpropanoic acid, 4-(beta-D-glucopyranosyloxy)-6-methoxy-	[M+Na]+	C18H22O10	Phenolic glycosides	OLFRCQFNQXYDGW-NDOBWRGRSA-N	COC1=C(CCC(O)=O)C(=C2C=COC2=C1)O[C@@H]3O[C@H](CO)[C@@H](O)[C@H](O)[C@H]3O	28.01	0.00017793	1.34811
1411	Negative	6.722	651.172	Unknown	[M-H]-	null	null	null	null	0.15136	0.00017793	1.33069
1412	Positive	0.427	119.966	Unknown	[M+H]+	null	null	null	null	10.481	0.00017832	1.19066
1413	Positive	6.521	479.277	low score: Schweinfurthin F	[M+Na]+	C30H38O5	Xanthenes	BUFNPAYKUGAAAO-CMDGGOBGSA-N	COC1=CC(/C=C/C2=CC(O)=C(C(O)=C2)C/C=C(C)\C)=CC3=C1OC4(CCC(C(C)(C4C3)C)O)C	9.8901	0.00017832	1.53948
1414	Positive	11.333	285.269	low score: h_58_bolasterone-m	[M-2H2O+H]+	C21H36O2	Androgens and derivatives	ZWQUPIDNCOVROC-HEEAJRSSSA-N	C[C@]1(O)CC[C@@H]2[C@]1(C)CC[C@H]3[C@H]2[C@H](C)C[C@@]4([H])[C@]3(C)CC[C@@H](O)C4	0.24585	0.0001784	1.28031
1415	Positive	12.664	353.292	Unknown	[M+H]+	null	null	null	null	23.073	0.00017862	1.43235
1416	Positive	0.43	282.926	Unknown	[M+H]+	null	null	null	null	9.7371	0.00017862	1.1628
1417	Positive	1.03	436.889	Unknown	[M+H]+	null	null	null	null	6.8269	0.00017862	1.63752
1418	Positive	12.617	207.188	Unknown	[M+H]+	null	null	null	null	4.3664	0.00017862	1.52087
1419	Positive	1.414	430.285	low score: Mifepristone	[M+H]+	C29H35NO2	Oxosteroids	VKHAHZOOUSRJNA-GCNJZUOMSA-N	CC#C[C@]1(O)CC[C@H]2[C@@H]3CCC4=CC(=O)CCC4=C3[C@H](C[C@]12C)C1=CC=C(C=C1)N(C)C	0.34326	0.00017862	1.55323
1420	Positive	6.49	488.305	low score: glycocholic acid	[M+Na]+	C26H43NO6	Glycinated bile acids and derivatives	RFDAIACWWDREDC-VKRKCYKBSA-N	C[C@H](CCC(=O)NCC(=O)O)[C@H]1CC[C@@H]2[C@@]1([C@H](C[C@H]3[C@H]2[C@@H](C[C@H]4[C@@]3(CC[C@H](C4)O)C)O)O)C	2.4043	0.00017868	1.29373
1421	Positive	9.341	541.367	Unknown	[M+H]+	null	null	null	null	4.0084	0.00017884	1.46824
1422	Positive	1.041	557.893	Unknown	[M+H]+	null	null	null	null	5.4025	0.00017899	1.31535
1423	Positive	1.059	984.698	Unknown	[M+H]+	null	null	null	null	8.3542	0.0001803	1.26303
1424	Positive	13.468	679.481	Unknown	[M+H]+	null	null	null	null	0.25982	0.0001814	1.52041
1425	Positive	14.426	215.141	low score: DETHIOBIOTIN	[M+H]+	C10H18N2O3	Medium-chain fatty acids	AUTOLBMXDDTRRT-JGVFFNPUSA-N	C[C@@H]1NC(=O)N[C@@H]1CCCCCC(O)=O	3.6522	0.0001814	1.4914
1426	Positive	7.817	638.375	Unknown	[M+H]+	null	null	null	null	0.28399	0.00018202	1.52889
1427	Positive	0.578	279.184	low score: (6E)-2,6,10-trimethyldodeca-6,11-diene-2,3,10-triol_major	[M+Na]+	C15H28O3	Sesquiterpenoids	BGUYVWYUIXKRDO-XYOKQWHBSA-N	C=CC(C)(O)CCC=C(C)CCC(O)C(C)(C)O	0.38886	0.00018202	1.28203
1428	Positive	7.706	187.127	low score: bis-(acetyl)diaminopentane	[M+H]+	C9H18N2O2	Acetamides	FQKKPLXFGDCBJT-UHFFFAOYSA-N	OC(=NCCCCCN=C(O)C)C	21.934	0.00018251	1.15698
1429	Positive	12.511	369.267	low score: Dihydromuronic acid	[M+K]+	C21H36O5	Gamma butyrolactones	SPGPUDJMXMJNCU-JLAWEPINSA-N	CC(=O)CCCCCCCCCCCCC[C@@H]1C(C(C)C(=O)O1)C(=O)O	8.1258	0.00018251	1.17282
1430	Positive	0.328	811.673	Unknown	[M+H]+	null	null	null	null	0.28991	0.00018251	1.3608
1431	Positive	0.731	369.085	low score: ethyl 3-(2,3-dihydrobenzo[b][1,4]dioxin-6-yl)-7-hydroxy-4-oxo-4H-chromene-2-carboxylate	[M+H]+	C20H16O7	Isoflavones	NTNSKOKPJWYQGX-UHFFFAOYSA-N	O=C(OCC)C=1OC2=CC(O)=CC=C2C(=O)C1C=3C=CC=4OCCOC4C3	32.884	0.00018263	1.5444
1432	Positive	12.182	313.296	Unknown	[M+H]+	null	null	null	null	34.391	0.00018392	1.61257
1433	Positive	14.159	628.417	Unknown	[M+H]+	null	null	null	null	9.5901	0.00018392	1.39144
1434	Positive	1.071	444.962	Unknown	[M+H]+	null	null	null	null	0.40027	0.00018451	1.31187
1435	Positive	8.054	258.297	Unknown	[M+H]+	null	null	null	null	0.21176	0.00018472	1.28203
1436	Positive	17.023	401.373	low score: Campesterol	[M+H]+	C28H48O	Ergosterols and derivatives	SGNBVLSWZMBQTH-ZRUUVFCLSA-N	OC1CC2=CCC3C(CCC4(C)C(CCC34)C(C)CCC(C)C(C)C)C2(C)CC1	0.27897	0.00018472	1.63496
1437	Positive	14.544	419.346	no MS2: "(3R,5S,7R,9S,10S,12S,13R,14S,17R)-17-((2R)-7-hydroxy-6-methylheptan-2-yl)-10,13-dimethylhexadecahydro-1H-cyclopenta[a]phenanthrene-3,7,12-triol"	[M-H2O+H]+	C27H48O4	Tetrahydroxy bile acids, alcohols and derivatives	XJZGNVBLVFOSKJ-XZULNKEGSA-N	C[C@H](CCCC(C)CO)[C@H]1CC[C@H]2[C@]3([H])[C@H](O)C[C@@H]4C[C@H](O)CC[C@]4(C)[C@H]3C[C@H](O)[C@@]21C	0.37457	0.00018472	1.49241
1438	Positive	7.359	404.233	low score: NCGC00180558-02!	[M+NH4]+	C21H30O5	Naphthopyrans	SNDKOELNUHQSEY-UHFFFAOYSA-N	CC1CC(=O)C2=C(O1)OC3(C)CCC4(O)C(C)(C)CCC(=O)C4(C)C3C2	0.29036	0.00018546	1.66128
1439	Positive	9.479	279.185	low score: (6E)-2,6,10-trimethyldodeca-6,11-diene-2,3,10-triol_49.3%	[M+Na]+	C15H28O3	Sesquiterpenoids	BGUYVWYUIXKRDO-XYOKQWHBSA-N	C=CC(C)(O)CCC=C(C)CCC(O)C(C)(C)O	0.42853	0.00018576	1.22718
1440	Positive	0.425	252.876	Unknown	[M+H]+	null	null	null	null	171.07	0.00018625	1.61609
1441	Positive	8.862	506.398	Unknown	[M+H]+	null	null	null	null	5.0152	0.00018651	1.60581
1442	Positive	7.805	494.285	low score: Dihydrogedunic Acid, Methyl Ester	[M+NH4]+	C26H36O8	Naphthopyrans	CDTMPWYDQKWYFT-IASWOTTCSA-N	O=C(OC1CC2C(C(=O)CCC2(C)C3CCC4(C)C(OC(=O)C5OC54C13C)C(=O)OC)(C)C)C	35.758	0.00018676	1.29252
1443	Positive	7.735	228.164	low score: C8-homoserine lactone	[M+H]+	C12H21NO3	N-acyl-alpha amino acids and derivatives	JKEJEOJPJVRHMQ-UHFFFAOYSA-N	CCCCCCCC(=O)NC1CCOC1=O	3.5183	0.00018676	1.07108
1444	Positive	0.376	232.889	Unknown	[M+H]+	null	null	null	null	12.621	0.00018676	1.21946
1445	Positive	0.838	355.083	no MS2: 6-methoxy-sterigmatocystin	[M+K]+	C19H14O7	Sterigmatocystins	VVRUNWFPOWIBDY-WPCRTTGESA-N	O=C1C2=C(C(OC)=CC=C2O)OC3=C4C(O[C@]5([H])[C@@]4([H])C=CO5)=CC(OC)=C31	4.1933	0.00018676	0.89917
1446	Positive	9.026	590.271	no MS2: (NAG)(anNAM)-AqOG[3-NH2-SATA]	[M+2H]2+	C47H78N12O23	Polypeptides	CGGXYVJDGPQESG-UHFFFAOYSA-N	CC(=O)NC1C(OC2C3COC(O3)C(NC(C)=O)C2OC(C)C(=O)NC(C)C(=O)NC(CCC(=O)NC(CCCNC(=O)C(CO)NC(=O)C(C)NC(=O)C(NC(=O)C(C)N)C(C)O)C(=O)NCC(=O)O)C(N)=O)OC(CO)C(O)C1O	180.32	0.00018697	1.66699
1447	Positive	1.064	167.045	no MS2: 2-Nitrobenzamide	[M+H-2H2O]+	C7H6N2O3	Nitrobenzenes	KLGQWSOYKYFBTR-UHFFFAOYSA-N	NC(=O)C1=C(C=CC=C1)[N+]([O-])=O	0.47332	0.00018752	1.32626
1448	Positive	1.811	422.852	Unknown	[M+H]+	null	null	null	null	6.379	0.00018752	1.63687
1449	Positive	1.03	336.194	no MS2: NCGC00380786-01!3-methoxy-4-(3-methylbut-2-enyl)-5-[(E)-2-phenylethenyl]phenol	[M+ACN+H]+	C20H22O2	Stilbenes	NFAWEPOBHKEHPO-ZHACJKMWSA-N	COC1=C(CC=C(C)C)C(\C=C\C2=CC=CC=C2)=CC(O)=C1	0.29448	0.00018752	1.29435
1450	Positive	6.667	640.44	Unknown	[M+H]+	null	null	null	null	0.32123	0.00018752	1.54211
1451	Positive	13.349	420.25	low score: Phytosphingosine-1-P	[M+Na]+	C18H40NO6P	Phosphosphingolipids	AYGOSKULTISFCW-KZNAEPCWSA-N	CCCCCCCCCCCCCC[C@H]([C@@H]([C@@H](COP(=O)(O)O)N)O)O	0.27159	0.00019069	1.57038
1452	Positive	14.122	698.557	Unknown	[M+H]+	null	null	null	null	0.19969	0.00019096	1.56233
1453	Positive	7.806	472.302	no MS2: GLYCOCHENODEOXYCHOLATE	[M+Na]+	C26H43NO5	Glycinated bile acids and derivatives	GHCZAUBVMUEKKP-UHFFFAOYSA-N	CC(CCC(=O)NCC(=O)O)C1CCC2C1(CCC3C2C(CC4C3(CCC(C4)O)C)O)C	4.6646	0.00019096	1.29114
1454	Positive	1.039	948.836	Unknown	[M+H]+	null	null	null	null	5.8397	0.00019127	1.38631
1455	Positive	6.579	493.295	low score: potassium (1R,5aR)-5a,5b,8,8,11a-pentamethyl-9-oxo-1-(prop-1-en-2-yl)icosahydro-1H-cyclopenta[a]chrysene-3a-carboxylate	[M+Na]+	C30H45O3	Triterpenoids	RDWQLXVTUDUUAU-ASCIYBQHSA-M	[K+].O=C([O-])C12CCC(C(=C)C)C2C3CCC4C5(C)CCC(=O)C(C)(C)C5CCC4(C)C3(C)CC1	6.4369	0.00019284	1.27112
1456	Positive	1.048	950.738	Unknown	[M+H]+	null	null	null	null	4.0891	0.00019298	1.41508
1457	Positive	0.578	101.95	Unknown	[M+H]+	null	null	null	null	8.0046	0.00019321	0.921033
1458	Positive	1.018	752.842	Unknown	[M+H]+	null	null	null	null	23.106	0.00019325	1.62514
1459	Positive	1.102	756.759	Unknown	[M+H]+	null	null	null	null	4.4157	0.00019325	1.20824
1460	Positive	6.31	311.192	low score: testosterone	[M+Na]+	C19H28O2	Androgens and derivatives	MUMGGOZAMZWBJJ-DYKIIFRCSA-N	O=C1C=C2CCC3C(CCC4(C)C(O)CCC34)C2(C)CC1	2.2748	0.00019325	1.0609
1461	Positive	0.44	314.876	Unknown	[M+H]+	null	null	null	null	34.036	0.0001933	1.35515
1462	Positive	6.489	203.133	low score: Alanylleucine (isomer of 674)	[M+H]+	C9H18N2O3	Peptides	RDIKFPRVLJLMER-UHFFFAOYSA-N	O=C(O)C(NC(=O)C(N)C)CC(C)C	10.072	0.00019435	1.72878
1463	Positive	11.932	583.361	low score: Dihydrobacillaene	[M+H]+	C34H50N2O6	Medium-chain fatty acids	VGZNPOHVJNZAOU-OISZERLPSA-N	CC(C)CC(C(=O)NCCCC=CC=CC(=CC=CC=C(C)C(CC(=O)NC(=CC=CC=CC(C)C(=O)O)C)O)C)O	24.944	0.00019459	1.2041
1464	Positive	0.059	221.167	no MS2: Prilocaine	[M+H]+	C13H20N2O	Alpha amino acid amides	MVFGUOIZUNYYSO-UHFFFAOYSA-N	C1=CC=CC(=C1C)NC(C(NCCC)C)=O	6.6843	0.00019459	1.66751
1465	Positive	0.643	119.986	Unknown	[M+H]+	null	null	null	null	37.281	0.00019515	1.63929
1466	Negative	6.755	588.19	Unknown	[M-H]-	null	null	null	null	0.13791	0.00019672	1.26318
1467	Positive	0.427	244.846	Unknown	[M+H]+	null	null	null	null	72.573	0.00019792	1.57335
1468	Positive	8.997	515.349	Unknown	[M+H]+	null	null	null	null	15.353	0.00020087	1.25036
1469	Negative	9.414	343.213	low score: FA 18:2+4O; PlaSMA ID-797	[M-H]-	C18H32O6	Oxidized fatty acids	BHWUKOCNOLCGLB-UHFFFAOYNA-N	O=C(O)CCCCCCCC(O)C=CC1OC(CC1(O))C(O)CC	6.2479	0.00020088	1.16276
1470	Positive	6.444	472.305	low score: GLYCOCHENODEOXYCHOLATE	[M+Na]+	C26H43NO5	Glycinated bile acids and derivatives	GHCZAUBVMUEKKP-UHFFFAOYSA-N	CC(CCC(=O)NCC(=O)O)C1CCC2C1(CCC3C2C(CC4C3(CCC(C4)O)C)O)C	4.0385	0.00020136	1.43372
1471	Positive	12.097	346.298	low score: Macamide B	[M+H]+	C23H39NO	N-acyl amines	MLGPKWUKOQAAGI-UHFFFAOYSA-N	O=C(NCC=1C=CC=CC1)CCCCCCCCCCCCCCC	10.663	0.00020205	1.27012
1472	Positive	10.755	646.326	Aconitine	[M+H]+	C34H47NO11	Aconitane-type diterpenoid alkaloids	XFSBVAOIAHNAPC-HLBYDYOGSA-N	O=C(OC1C2C3CC1(O)C(OC)C(O)C2(OC(=O)C)C4C(OC)C5C6(COC)CN(CC)C4C35C(OC)CC6O)C=7C=CC=CC7	5.975	0.00020235	1.60935
1473	Positive	0.693	274.825	Unknown	[M+H]+	null	null	null	null	155.55	0.000203	1.73182
1474	Positive	10.515	640.291	Unknown	[M+H]+	null	null	null	null	7.1199	0.000203	1.43164
1475	Positive	5.936	230.156	Unknown	[M+H]+	null	null	null	null	30.904	0.00020301	1.66205
1476	Positive	11.222	552.437	Unknown	[M+H]+	null	null	null	null	0.34375	0.00020316	1.56209
1477	Positive	14.308	667.226	no MS2: NCGC00385213-01!7-hydroxy-3-[4-hydroxy-3-(3-methylbut-2-enyl)phenyl]chromen-4-one [IIN-based on: CCMSLIB00000848834]	[2M+Na]+	C20H18O4	Isoflavones	OBGPEBYHGIUFBN-UHFFFAOYSA-N	CC(C)=CCC1=CC(=CC=C1O)C2=COC3=CC(O)=CC=C3C2=O	20.543	0.00020326	1.27362
1478	Positive	0.432	302.92	Unknown	[M+H]+	null	null	null	null	5.4315	0.00020326	1.07325
1479	Positive	9.652	629.357	low score: Lopinavir	[M+H]+	C37H48N4O5	Valine and derivatives	KJHKTHWMRKYKJE-SUGCFTRWSA-N	Cc1cccc(c1OCC(=O)N[C@@H](Cc2ccccc2)[C@H](C[C@H](Cc3ccccc3)NC(=O)[C@H](C(C)C)N4CCCNC4=O)O)C	0.29565	0.0002041	1.52756
1480	Positive	16.137	451.456	Unknown	[M+H]+	null	null	null	null	25.249	0.00020492	1.21224
1481	Positive	1.187	338.07	no MS2: Famotidine	[M+H]+	C8H15N7O2S3	2,4-disubstituted thiazoles	XUFQPHANEAPEMJ-UHFFFAOYSA-N	O=S(=O)(N)NC(=N)CCSCC=1N=C(SC1)NC(=N)N	3.5541	0.00020492	1.06938
1482	Positive	8.782	219.191	low score: Tributylphosphine oxide	[M+H]+	C12H27OP	Organophosphine oxides	MNZAKDODWSQONA-UHFFFAOYSA-N	CCCCP(=O)(CCCC)CCCC	2.5245	0.00020492	1.33382
1483	Positive	1.174	242.12	no MS2: n-methylflindersine	[M+H]+	C15H15NO2	Pyranoquinolines	RJZFGBNKPOVCHQ-UHFFFAOYSA-N	O=C1C=2C=CC(OC2C=3C=CC=CC3N1C)(C)C	0.4239	0.00020492	1.17786
1484	Positive	1.024	808.808	Unknown	[M+H]+	null	null	null	null	26.053	0.0002051	1.58986
1485	Positive	18.412	340.381	low score: MLS002207232-01!HEXETIDINE141-94-6	[M+H]+	C21H45N3	Diazinanes	DTOUUUZOYKYHEP-UHFFFAOYSA-N	CCCCC(CC)CN1CN(CC(CC)CCCC)CC(C)(N)C1	4.9644	0.00020531	1.36352
1486	Positive	12.511	331.308	low score: MMV687273	[M+H]+	C22H38N2	Monoterpenoids	JFIBVDBTCDTBRH-IDUWFGFVSA-N	C(=C(C)C)CCC(=CCNCCNC1C2CC3CC(C2)CC1C3)C	938.17	0.00020641	1.58954
1487	Positive	9.274	496.457	Unknown	[M+H]+	null	null	null	null	0.26809	0.00020641	1.31035
1488	Positive	18.973	537.404	low score: Lysine conjugated cholic acid	[M+H]+	C30H52N2O6	Glycinated bile acids and derivatives	FTOTVNJFGHCOCZ-UHFFFAOYSA-N	C[CH](CCC(NC(CCCCN)C(O)=O)=O)[CH]1CC[CH]2[C]3([H])[CH](O)C[C]4([H])C[CH](O)CC[C]4(C)[CH]3C[CH](O)[C]21C	0.30184	0.00020742	1.37854
1489	Positive	10.494	604.36	low score: desmethylenylnocardamine	[M+NH4]+	C26H46N6O9	Macrolactams	SXTGVXKFOVZYIK-UHFFFAOYSA-N	O=C1N(O)CCCCN=C(O)CCC(=O)N(O)CCCCCN=C(O)CCC(=O)N(O)CCCCCN=C(O)CC1	12.917	0.00020834	1.47384
1490	Positive	13.417	421.284	low score: Cholest-4,6-Dien-3-One	[M+K]+	C27H42O	Cholesterols and derivatives	XIWMRKFKSRYSIJ-GYKMGIIDSA-N	O=C1C=C2C=CC3C(CCC4(C)C3CCC4C(C)CCCC(C)C)C2(C)CC1	0.31784	0.0002089	1.67298
1491	Positive	1.04	725.832	Unknown	[M+H]+	null	null	null	null	4.4238	0.0002089	0.965203
1492	Positive	0.11	372.127	no MS2: NCGC00380360-01!7-methoxy-6-[(2S,3R,4S,5S,6R)-3,4,5-trihydroxy-6-(hydroxymethyl)oxan-2-yl]oxychromen-2-one	[M+NH4]+	C16H18O9	Coumarin glycosides	WBAVLTNIRYDCPM-YMILTQATSA-N	COC1=CC2=C(C=CC(=O)O2)C=C1O[C@@H]3O[C@H](CO)[C@@H](O)[C@H](O)[C@H]3O	28.131	0.00021032	1.45274
1493	Positive	0.667	168.911	Unknown	[M+H]+	null	null	null	null	13.495	0.00021035	1.6139
1494	Positive	0.535	275.818	Unknown	[M+H]+	null	null	null	null	108.26	0.00021057	1.77358
1495	Positive	16.705	802.61	Unknown	[M+H]+	null	null	null	null	0.26474	0.00021057	1.42638
1496	Positive	6.466	449.232	low score: atractyloside A	[M+H]+	C21H36O10	Terpene glycosides	QNBLVYVBWDIWDM-BSLJOXIBSA-N	O=C1CC2C(CC(CCC2(O)CO)C(OC3OC(CO)C(O)C(O)C3O)(C)C)C1(O)C	3.2339	0.00021095	1.1047
1497	Negative	12.061	365.188	low score: 3-[2-(6,7-dihydroxy-1,2,4a-trimethylspiro[3,4,6,7,8,8a-hexahydro-2H-naphthalene-5,2'-oxirane]-1-yl)ethyl]-2-hydroxy-2H-furan-5-one	[M-H]-	C20H30O6	Butenolides	QMWJARHMJRTJMQ-UHFFFAOYSA-N	O=C1OC(O)C(=C1)CCC2(C)C(C)CCC3(C)C2CC(O)C(O)C43OC4	2.6211	0.00021151	1.18056
1498	Positive	10.88	716.365	low score: (4E)-4-[3-[4,5-dihydroxy-6-(hydroxymethyl)-3-[3,4,5-trihydroxy-6-(hydroxymethyl)oxan-2-yl]oxyoxan-2-yl]oxy-14-hydroxy-10,13-dimethyl-2,3,4,5,6,7,8,9,11,12,15,16-dodecahydro-1H-cyclopenta[a]phenanthren-17-ylidene]oxolan-2-one	[M+NH4]+	C35H54O14	Steroidal glycosides	NRQCIBSGSINRCF-KNTRCKAVSA-N	O=C1OCC(=C2CCC3(O)C4CCC5CC(OC6OC(CO)C(O)C(O)C6OC7OC(CO)C(O)C(O)C7O)CCC5(C)C4CCC23C)C1	0.27535	0.00021174	1.53886
1499	Positive	9.769	301.164	low score: 1-[4,5-bis(hydroxymethyl)-3-methoxy-2-methylphenoxy]-3-methylbutane-2,3-diol	[M+H]+	C15H24O6	Benzyl alcohols	MAQMWSUGBCIGLJ-UHFFFAOYSA-N	OCC1=CC(OCC(O)C(O)(C)C)=C(C(OC)=C1CO)C	0.48171	0.00021312	1.28697
1500	Positive	9.052	578.317	no MS2: Aplaviroc	[M+H]+	C33H43N3O6	N-benzylpiperidines	GWNOTCOIYUNTQP-FQLXRVMXSA-N	CCCCN1C(=O)[C@@H]([C@H](O)C2CCCCC2)NC(=O)C12CCN(Cc1ccc(Oc3ccc(C(=O)O)cc3)cc1)CC2	4.7978	0.00021449	1.19101
1501	Positive	11.371	552.44	Unknown	[M+H]+	null	null	null	null	0.31095	0.00021543	1.55763
1502	Positive	0.746	205.104	low score: Tryptophan	[M+H]+	C11H12N2O2	Indolyl carboxylic acids and derivatives	QIVBCDIJIAJPQS-UHFFFAOYSA-N	C1=CC=C2C(=C1)C(=CN2)CC(C(=O)O)N	0.42385	0.00021642	1.25331
1503	Positive	0.427	247.885	Unknown	[M+H]+	null	null	null	null	46.008	0.00021679	1.46493
1504	Positive	9.353	614.3	low score: NCGC00381019-01_C33H40O10_1H-Cyclopentacyclododecene-4,10(2H,5H)-dione, 3a,9,13-tris(acetyloxy)-1-(benzoyloxy)-3,3a,8,9,13,13a-hexahydro-2,5,8,8,12-pentamethyl-, (6E,11E)-	[M+NH4]+	C33H40O10	Jatrophane and cyclojatrophane diterpenoids	MVZQKKYLZHTDHU-QXUUVGOVSA-N	CC1CC2(OC(C)=O)C(C1OC(=O)C3=CC=CC=C3)C(OC(C)=O)C(=C/C(=O)C(OC(C)=O)C(C)(C)/C=C/C(C)C2=O)/C	29.479	0.00021707	1.66942
1505	Positive	1.002	267.076	no MS2: BIOTIN	[M+Na]+	C10H16N2O3S	Biotin and derivatives	YBJHBAHKTGYVGT-ZKWXMUAHSA-N	[H][C@]12CS[C@@H](CCCCC(O)=O)[C@@]1([H])NC(=O)N2	0.39608	0.00021781	1.38496
1506	Positive	0.449	141.959	Unknown	[M+H]+	null	null	null	null	46.726	0.00021788	1.16546
1507	Positive	0.731	304.819	Unknown	[M+H]+	null	null	null	null	258.03	0.00021788	1.70778
1508	Positive	14.82	758.626	Unknown	[M+H]+	null	null	null	null	0.37853	0.00021788	1.13272
1509	Positive	8.54	634.264	Unknown	[M+H]+	null	null	null	null	14.686	0.00021939	1.70337
1510	Positive	0.523	241.847	Unknown	[M+H]+	null	null	null	null	51.375	0.0002198	1.66215
1511	Positive	8.2	518.362	low score: ORLISTAT	[M+Na]+	C29H53NO5	Leucine and derivatives	AHLBNYSZXLDEJQ-FWEHEUNISA-N	CCCCCCCCCCC[C@@H](C[C@@H]1OC(=O)[C@H]1CCCCCC)OC(=O)[C@H](CC(C)C)NC=O	0.33233	0.00022	1.47555
1512	Positive	17.78	518.494	Unknown	[M+H]+	null	null	null	null	0.37185	0.00022	1.32328
1513	Positive	1.027	572.872	Unknown	[M+H]+	null	null	null	null	6.717	0.00022108	1.55788
1514	Negative	0.355	518.927	Unknown	[M-H]-	null	null	null	null	2.2383	0.00022121	1.14514
1515	Positive	14.336	355.098	no MS2: [1-hydroxy-1-(4-methoxyphenyl)propan-2-yl] 4-methoxybenzoate	[M+K]+	C18H20O5	P-methoxybenzoic acids and derivatives	MHJLKHNHGMUAPQ-UHFFFAOYSA-N	O=C(OC(C)C(O)C1=CC=C(OC)C=C1)C2=CC=C(OC)C=C2	14.918	0.00022271	1.396
1516	Positive	1.122	125.029	no MS2: (R)-4-aminoisoxazolidin-3-one	[M+Na]+	C3H6N2O2	Alpha amino acids and derivatives	DYDCUQKUCUHJBH-UWTATZPHSA-N	O=C1NOCC1N	0.48615	0.00022567	1.10641
1517	Positive	10.483	555.391	Unknown	[M+H]+	null	null	null	null	11.081	0.0002261	1.4212
1518	Positive	6.478	435.249	low score: (2Z)-2-[(E)-6-(hydroxymethyl)-2,4,8,10-tetramethyldodec-2-enylidene]-4-methylpentanedioic acid	[M+2Na-H]+	C23H40O5	Acyclic diterpenoids	NNPPLRJHBQPBAQ-UKRBZAIKSA-N	O=C(O)C(=CC(=CC(C)CC(CO)CC(C)CC(C)CC)C)CC(C(=O)O)C	6.8361	0.00022674	1.61925
1519	Positive	14.941	419.344	no MS2: "(3R,5S,7R,9S,10S,12S,13R,14S,17R)-17-((2R)-7-hydroxy-6-methylheptan-2-yl)-10,13-dimethylhexadecahydro-1H-cyclopenta[a]phenanthrene-3,7,12-triol"	[M-H2O+H]+	C27H48O4	Tetrahydroxy bile acids, alcohols and derivatives	XJZGNVBLVFOSKJ-XZULNKEGSA-N	C[C@H](CCCC(C)CO)[C@H]1CC[C@H]2[C@]3([H])[C@H](O)C[C@@H]4C[C@H](O)CC[C@]4(C)[C@H]3C[C@H](O)[C@@]21C	0.36973	0.00022674	1.43632
1520	Positive	0.42	143.002	Unknown	[M+H]+	null	null	null	null	16.572	0.00022694	1.39103
1521	Positive	12.51	239.255	Unknown	[M+H]+	null	null	null	null	129.08	0.00022762	1.51402
1522	Positive	0.513	247.816	Unknown	[M+H]+	null	null	null	null	58.038	0.00022833	1.72744
1523	Positive	8.55	614.272	low score: Ferrioxamine B [M+Fe-2H]	[M+H]+	C25H45N6O8	N-acyl amines	SRMBQCVUAVULDJ-UHFFFAOYSA-N	CC(=O)N1CCCCCNC(=O)CCC(=O)N2CCCCCNC(=O)CCC(=O)N(CCCCCN)O[Fe](O1)O2	31.236	0.00022833	1.49929
1524	Positive	1.038	690.965	Unknown	[M+H]+	null	null	null	null	3.5565	0.00022865	1.12917
1525	Positive	7.698	233.126	N-Cyclohexyl-2-benzothiazol-amine	[M+H]+	C13H16N2S	Benzothiazoles	UPWPIFMHSFSVLE-UHFFFAOYSA-N	C1CCC(CC1)NC1=NC2=CC=CC=C2S1	2.1604	0.00022868	1.1892
1526	Positive	0.778	146.946	Unknown	[M+H]+	null	null	null	null	10.739	0.00022976	1.43522
1527	Positive	7.798	397.232	low score: 4-(3,14-dihydroxy-10,13-dimethylhexadecahydro-1H-cyclopenta[a]phenanthren-17-yl)furan-2(5H)-one	[M+H-H2O]+	C23H34O4	Cardenolides and derivatives	XZTUSOXSLKTKJQ-UHFFFAOYSA-N	O=C1OCC(=C1)C2CCC3(O)C4CCC5CC(O)CCC5(C)C4CCC23C	7.4379	0.00023027	1.29854
1528	Positive	16.393	365.291	Unknown	[M+H]+	null	null	null	null	0.33125	0.00023027	1.58301
1529	Positive	0.554	131.939	Unknown	[M+H]+	null	null	null	null	963.78	0.00023128	1.65625
1530	Positive	0.425	228.872	Unknown	[M+H]+	null	null	null	null	12.35	0.00023204	1.20548
1531	Negative	18.36	297.718	Unknown	[M-H]-	null	null	null	null	0.48297	0.00023204	1.21819
1532	Positive	9.019	497.884	Unknown	[M+H]+	null	null	null	null	7.8925	0.00023207	1.51674
1533	Positive	1.072	918.704	Unknown	[M+H]+	null	null	null	null	6.6447	0.00023207	1.37594
1534	Positive	16.093	369.366	low score: Coprostanone	[M-H2O+H]+	C27H46O	Cholesterols and derivatives	PESKGJQREUXSRR-JAGYRSRJSA-N	C(C)(C1)(C(C(C)CCCC(C)C)4)C(CC4)C(C2)C(C(C)(C3)C([H])(CC(C3)=O)C2)C1	14.943	0.00023213	1.06626
1535	Positive	8.032	434.345	Unknown	[M+H]+	null	null	null	null	0.31339	0.00023244	1.48565
1536	Positive	14.34	441.286	Unknown	[M+H]+	null	null	null	null	6.7463	0.00023337	1.15761
1537	Positive	8.671	454.325	low score: Peimine	[M+Na]+	C27H45NO3	Cerveratrum-type alkaloids	IUKLSMSEHKDIIP-BZMYINFQSA-N	OC1CCC2(C)C(C1)C(O)CC3C4CCC5C(CN6CC(C)CCC6C5(O)C)C4CC32	30.251	0.00023407	1.43453
1538	Positive	0.838	273.184	no MS2: h_92_oxabolone	[M-H2O+H]+	C18H26O3	Estrogens and derivatives	GXHBCWCMYVTJOW-DNBWYCQVSA-N	O[C@H]1CCC2C3CCC4=C(O)C(CCC4C3CC[C@@]21C)=O	3.3664	0.00023407	1.04727
1539	Positive	6.441	279.184	no MS2: NCGC00385848-01_C19H24N2O_(3alpha,14alpha,16alpha)-14,15-Dihydroeburnamenin-14-ol	[M-H2O+H]+	C19H24N2O	Eburnan-type alkaloids	HONLKDDLTAZVQV-UHFFFAOYSA-N	CCC12CCCN3CCC4=C(C13)[N](C(O)C2)C5=CC=CC=C45	0.4035	0.0002379	1.21201
1540	Positive	6.927	782.049	Unknown	[M+H]+	null	null	null	null	0.29859	0.0002379	1.48334
1541	Positive	9.705	560.349	Unknown	[M+H]+	null	null	null	null	0.30985	0.00023859	1.54012
1542	Positive	13.597	298.299	Unknown	[M+H]+	null	null	null	null	0.35029	0.00024009	1.39149
1543	Positive	8.343	728.284	low score: N-((7S)-10-(((2S)-1-(2-(2,4-dimethoxyphenyl)pyrrolidin-1-yl)-4-(methylthio)-1-oxobutan-2-yl)amino)-1,2,3-trimethoxy-9-oxo-5,6,7,9-tetrahydrobenzo[a]heptalen-7-yl)acetamide	[M+Na]+	C38H47N3O8S	Methionine and derivatives	ULRPKNXAJVTGHF-GRMXABTLSA-N	O=C1C=C2C(=CC=C1NC(C(=O)N3CCCC3C4=CC=C(OC)C=C4OC)CCSC)C5=C(OC)C(OC)=C(OC)C=C5CCC2NC(=O)C	12.271	0.00024076	1.27259
1544	Positive	0.07	836.687	Unknown	[M+H]+	null	null	null	null	0.32339	0.00024076	1.42272
1545	Positive	7.737	477.377	Unknown	[M+H]+	null	null	null	null	3.6482	0.00024145	1.21034
1546	Negative	7.202	427.241	low score: Andrastin D	[M-H]-	C26H36O5	Oxosteroids	SMUNNMAWNRFDPB-UWWAQUNASA-N	CC1=C[C@H]2[C@@]3(CCC(=O)C([C@H]3CC[C@@]2([C@]4([C@@]1(C(=C(C4=O)C)O)C)C(=O)OC)C)(C)C)C	0.11921	0.0002426	1.24953
1547	Positive	0.427	364.787	Unknown	[M+H]+	null	null	null	null	37.924	0.00024298	1.52732
1548	Positive	0.677	411.725	Unknown	[M+H]+	null	null	null	null	43.068	0.00024337	1.69541
1549	Positive	0.443	237.881	Unknown	[M+H]+	null	null	null	null	27.43	0.00024337	1.32203
1550	Positive	0.335	549.447	Unknown	[M+H]+	null	null	null	null	0.31692	0.00024337	1.51168
1551	Positive	1.539	113.007	Unknown	[M+H]+	null	null	null	null	4.254	0.00024352	1.13218
1552	Positive	0.874	110.016	low score: Hypotaurine	[M+H]+	C2H7NO2S	Sulfinic acids	VVIUBCNYACGLLV-UHFFFAOYSA-N	NCCS(O)=O	2.7052	0.00024366	1.18232
1553	Positive	1.257	445.116	no MS2: [(2R,3R,4R,5R)-2-(2,4-dioxopyrimidin-1-yl)-4-hydroxy-5-(hydroxymethyl)oxolan-3-yl] 2,4-dimethoxy-6-methylbenzoate	[M+Na]+	C19H22N2O9	Pyrimidine nucleosides	DOVSRUBRIYLZCI-BASLNEPJSA-N	O=C(OC1C(O)C(OC1N2C=CC(O)=NC2=O)CO)C=3C(OC)=CC(OC)=CC3C	22.335	0.00024392	1.12814
1554	Positive	11.625	405.347	Unknown	[M+H]+	null	null	null	null	5.3908	0.00024392	1.36963
1555	Positive	11.111	124.096	low score: HISTIDINOL	[M-H2O+H]+	C6H11N3O	Aralkylamines	ZQISRDCJNBUVMM-YFKPBYRVSA-N	N[C@H](CO)CC1=CN=CN1	3.3001	0.00024432	1.54105
1556	Positive	16.777	429.406	low score: Epifriedelanol	[M+H]+	C30H52O	Triterpenoids	XCDQFROEGGNAER-PFOIMGGJSA-N	OC1CCC2C(C)(CCC3C2(C)CCC4(C)C5CC(C)(C)CCC5(C)CCC34C)C1C	0.30309	0.00024643	1.51588
1557	Positive	0.697	307.099	low score: NCGC00142553-05!5,7-dimethoxy-2-phenyl-2,3-dihydrochromen-4-one [IIN-based on: CCMSLIB00000848562]	[M+Na]+	C17H16O4	7-O-methylated flavonoids	IAFBOKYTDSDNHV-UHFFFAOYSA-N	COC1=CC2=C(C(=O)CC(O2)C3=CC=CC=C3)C(OC)=C1	19.807	0.0002467	1.4586
1558	Positive	0.427	277.879	Unknown	[M+H]+	null	null	null	null	19.237	0.00024704	1.21317
1559	Positive	8.119	446.29	Unknown	[M+H]+	null	null	null	null	0.28807	0.0002476	1.43122
1560	Positive	7.328	353.172	low score: meso-dihydroguaiaretic acid	[M+Na]+	C20H26O4	Dibenzylbutane lignans	ADFOLUXMYYCTRR-ZIAGYGMSSA-N	OC1=CC=C(C=C1OC)CC(C)C(C)CC2=CC=C(O)C(OC)=C2	6.0445	0.00024816	1.15571
1561	Negative	0.971	323.893	Unknown	[M-H]-	null	null	null	null	0.38793	0.00024868	1.32623
1562	Positive	16.714	429.405	low score: Epifriedelanol	[M+H]+	C30H52O	Triterpenoids	XCDQFROEGGNAER-PFOIMGGJSA-N	OC1CCC2C(C)(CCC3C2(C)CCC4(C)C5CC(C)(C)CCC5(C)CCC34C)C1C	0.28456	0.00024879	1.5194
1563	Positive	12.511	313.296	Unknown	[M+H]+	null	null	null	null	1003.6	0.000249	1.61593
1564	Negative	1.272	684.111	Unknown	[M-H]-	null	null	null	null	0.1055	0.00024912	1.32174
1565	Positive	8.939	478.327	low score: N-(4-((6aR,8aS)-4-hydroxy-6a,8a,9-trimethyl-3,4,5,6,6a,6b,7,8,8a,8b,11a,12,12a,12b-tetradecahydro-1H-naphtho[2',1':4,5]indeno[2,1-b]furan-10-yl)-2-methylbutyl)acetamide	[M+Na]+	C29H45NO3	Furostanes and derivatives	CNHACNVJEKRLHF-UDCIVARJSA-N	O=C(NCC(C)CCC=1OC2CC3C4CC=C5CC(O)CCC5(C)C4CCC3(C)C2C1C)C	7.5274	0.00024913	1.38526
1566	Positive	0.426	248.881	Unknown	[M+H]+	null	null	null	null	149.52	0.00024957	1.59025
1567	Positive	12.144	462.421	Unknown	[M+H]+	null	null	null	null	0.32175	0.00024964	1.5304
1568	Positive	0.826	210.946	Unknown	[M+H]+	null	null	null	null	11.292	0.00025042	1.64321
1569	Positive	13.506	362.238	Unknown	[M+H]+	null	null	null	null	0.30511	0.00025123	1.63783
1570	Positive	1.011	634.924	Unknown	[M+H]+	null	null	null	null	20.258	0.00025286	1.36408
1571	Positive	0.433	124.973	Unknown	[M+H]+	null	null	null	null	168.17	0.00025286	1.47924
1572	Positive	0.819	193.942	Unknown	[M+H]+	null	null	null	null	14.002	0.00025381	1.5137
1573	Positive	17.508	625.51	Unknown	[M+H]+	null	null	null	null	0.30006	0.00025381	1.59733
1574	Positive	0.845	205.101	low score: Tryptophan	[M+H]+	C11H12N2O2	Indolyl carboxylic acids and derivatives	QIVBCDIJIAJPQS-UHFFFAOYSA-N	C1=CC=C2C(=C1)C(=CN2)CC(C(=O)O)N	0.44293	0.00025392	1.22537
1575	Positive	1.037	798.778	Unknown	[M+H]+	null	null	null	null	14.284	0.00025466	1.459
1576	Positive	8.998	499.272	no MS2: NCGC00380718-01_C29H40O8_2-Butenoic acid, 2-methyl-, 1a,1b,4,4a,5,7a,7b,8,9,9a-decahydro-4a,7b-dihydroxy-3-(hydroxymethyl)-1,1,6,8-tetramethyl-9a-(2-methyl-1-oxopropoxy)-5-oxo-1H-cyclopropa[3,4]benz[1,2-e]azulen-9-yl ester, (2E)-	[M-H2O+H]+	C29H40O8	Phorbol esters	MVWXLRYZCZSBKW-OQLLNIDSSA-N	C/C=C(C)/C(=O)OC1C(C)C2(O)C(\C=C(CO)/CC3(O)C2\C=C(C)/C3=O)C4C(C)(C)C14OC(=O)C(C)C	4.6688	0.00025481	1.17899
1577	Positive	9.393	766.044	Unknown	[M+H]+	null	null	null	null	0.23512	0.00025517	1.4734
1578	Negative	6.944	443.215	low score: Mitragynine	[M+HCOO]-	C23H30N2O4	Corynanthean-type alkaloids	LELBFTMXCIIKKX-UHFFFAOYNA-N	CCC1CN2CCC3=C(NC4=C3C(OC)=CC=C4)C2CC1C(=COC)C(=O)OC	0.22166	0.00025546	1.33322
1579	Positive	1.098	796.69	Unknown	[M+H]+	null	null	null	null	4.2787	0.00025642	1.14137
1580	Positive	6.429	481.293	low score: 6-oxopristimerol	[M+H]+	C30H40O5	Phenanthrenes and derivatives	QHONUEZGTQYXKH-GOSHRYQWSA-N	OC(C(O)=C1)=C(C)C2=C1[C@@]3(C)C([C@](CC[C@]4(C)C5C[C@](C)(C(OC)=O)CC4)(C)[C@@]5(C)CC3)=CC2=O	9.9025	0.00025654	1.11972
1581	Positive	8.679	400.369	low score: Demissidine	[M+H]+	C27H45NO	Solanidines and derivatives	JALVTHFTYRPDMB-HRRTYWNUSA-N	C[C@H]1CC[C@@H]2[C@H]([C@H]3[C@@H](N2C1)C[C@@H]4[C@@]3(CC[C@H]5[C@H]4CC[C@@H]6[C@@]5(CC[C@@H](C6)O)C)C)C	24.831	0.00025736	1.10817
1582	Positive	11.36	560.407	Unknown	[M+H]+	null	null	null	null	2.9064	0.00025884	1.16842
1583	Positive	10.854	797.11	Unknown	[M+H]+	null	null	null	null	0.27067	0.00025989	1.5529
1584	Positive	1.013	828.868	Unknown	[M+H]+	null	null	null	null	20.497	0.00026094	1.38242
1585	Positive	1.031	504.882	Unknown	[M+H]+	null	null	null	null	6.8437	0.00026186	1.53682
1586	Positive	1.093	150.988	Unknown	[M+H]+	null	null	null	null	2.5719	0.00026219	1.22049
1587	Positive	6.18	393.238	low score: monolinolein	[M+2Na-H]+	C21H38O4	Lineolic acids and derivatives	WECGLUPZRHILCT-HZJYTTRNSA-N	O=C(OCC(O)CO)CCCCCCCC=CCC=CCCCCC	13.876	0.00026471	1.50655
1588	Positive	14.302	285.301	low score: N-[3-(Dimethylamino)propyl]dodecanamide	[M+H]+	C17H36N2O	N-acyl amines	TWMFGCHRALXDAR-UHFFFAOYSA-N	CCCCCCCCCCCC(=O)NCCCN(C)C	19.816	0.00026688	1.37989
1589	Positive	8.522	521.135	no MS2: NCGC00347847-02_C22H26O13_(1aS,1bS,2S,5aR,6S,6aS)-2-(beta-D-Glucopyranosyloxy)-1a-(hydroxymethyl)-1a,1b,2,5a,6,6a-hexahydrooxireno[4,5]cyclopenta[1,2-c]pyran-6-yl 3,4-dihydroxybenzoate	[M+Na]+	C22H26O13	O-glycosyl compounds	DBUOUVZMYWYRRI-YWEKDMGLSA-N	OC[C@H]1O[C@@H](O[C@@H]2O\C=C/[C@H]3[C@H](OC(=O)C4=CC=C(O)C(=C4)O)[C@@H]5O[C@]5(CO)[C@@H]23)[C@H](O)[C@@H](O)[C@@H]1O	7.8075	0.00026743	1.4355
1590	Positive	9.701	532.376	Unknown	[M+H]+	null	null	null	null	2.488	0.0002678	1.20153
1591	Positive	8.657	356.378	Unknown	[M+H]+	null	null	null	null	37.087	0.00026923	1.52537
1592	Positive	13.473	702.552	Unknown	[M+H]+	null	null	null	null	0.29116	0.00026923	1.5123
1593	Positive	1.053	616.906	Unknown	[M+H]+	null	null	null	null	4.0985	0.00026982	1.24759
1594	Positive	6.303	356.255	low score: 4-[(E)-3-hydroxy-8,10-dimethyl-2-(methylamino)dodec-6-enyl]phenol	[M+Na]+	C21H35NO2	Amphetamines and derivatives	RNCWKUCWPBNWOH-SOFGYWHQSA-N	OC1=CC=C(C=C1)CC(NC)C(O)CCC=CC(C)CC(C)CC	7.0646	0.00027198	1.56081
1595	Positive	13.796	380.235	low score: CP-401387	[M+H]+	C23H29N3O2	Indazoles	PRUGWHGQBHEDAX-QXONSOMPSA-N	CCC1=NN(C2CCCCC2)C2=C1C=CC(=C2)[C@]1(CC[C@@H](CC1)C(O)=O)C#N	13.579	0.00027336	1.34122
1596	Positive	0.752	269.847	Unknown	[M+H]+	null	null	null	null	51.76	0.00027615	1.57568
1597	Positive	11.069	114.1	low score: Unknown (carbon number 6); PlaSMA ID-45	[M+H]+	C6H11NO	Unknown	null	null	7.5476	0.00027648	1.699
1598	Positive	0.793	350.353	Unknown	[M+H]+	null	null	null	null	0.42751	0.00027798	1.2335
1599	Positive	8.44	524.313	low score: Tobramycin, N-propionyl derivative likely	[M+H]+	C21H41N5O10	4,6-disubstituted 2-deoxystreptamines	XMVDIYAEPSBCDQ-HXNOWKDOSA-N	O[C@H]1[C@H](N)[C@@H](O)[C@@H](O[C@H]2[C@H](N)C[C@H](N)[C@@H](O[C@@H]3[C@H](N)C[C@H](O)[C@@H](CNC(CC)=O)O3)[C@@H]2O)O[C@@H]1CO	5.7681	0.00027816	1.23452
1600	Positive	0.38	313.236	low score: Guggulsterone E&Z	[M+H]+	C21H28O2	Androgens and derivatives	WDXRGPWQVHZTQJ-AYSLTRBKSA-N	O=C1C=C2CCC3C4CC(=O)C(=CC)C4(C)CCC3C2(C)CC1	4.0983	0.00027816	1.27993
1601	Positive	1.039	730.788	Unknown	[M+H]+	null	null	null	null	13.611	0.00028195	1.4323
1602	Positive	1.114	772.731	Unknown	[M+H]+	null	null	null	null	4.0039	0.00028195	1.22833
1603	Positive	1.067	880.855	Unknown	[M+H]+	null	null	null	null	4.306	0.00028195	1.23071
1604	Positive	1.019	964.853	Unknown	[M+H]+	null	null	null	null	12.486	0.00028195	1.3495
1605	Positive	8.369	518.76	Unknown	[M+H]+	null	null	null	null	105.17	0.00028344	1.47008
1606	Positive	9.416	276.651	Unknown	[M+H]+	null	null	null	null	9.8953	0.00028368	1.40541
1607	Positive	0.872	270.87	Unknown	[M+H]+	null	null	null	null	29.646	0.00028498	1.66887
1608	Positive	0.764	409.732	Unknown	[M+H]+	null	null	null	null	35.317	0.00028566	1.684
1609	Positive	12.182	331.308	low score: MMV687273	[M+H]+	C22H38N2	Monoterpenoids	JFIBVDBTCDTBRH-IDUWFGFVSA-N	C(=C(C)C)CCC(=CCNCCNC1C2CC3CC(C2)CC1C3)C	30.327	0.00028566	1.55092
1610	Positive	0.694	238.846	Unknown	[M+H]+	null	null	null	null	67.926	0.00028584	1.59218
1611	Positive	0.547	283.846	Unknown	[M+H]+	null	null	null	null	88.959	0.00028681	1.71665
1612	Positive	9.534	597.344	Unknown	[M+H]+	null	null	null	null	15.444	0.00028746	1.38436
1613	Positive	8.369	520.377	Unknown	[M+H]+	null	null	null	null	373.47	0.00028767	1.75801
1614	Positive	1.047	802.815	Unknown	[M+H]+	null	null	null	null	5.2891	0.0002888	1.32871
1615	Positive	14.38	376.368	Unknown	[M+H]+	null	null	null	null	116.87	0.00028884	1.37925
1616	Positive	0.742	396.114	low score: 2-(5,11-dioxoisoindolo[2,1-a]quinazolin-6(5H,6aH,11H)-yl)-N-(1H-pyrazol-4-yl)acetamide	[M+Na]+	C20H15N5O3	Indoloquinazolines	QYGUYHZAAVMQBV-UHFFFAOYSA-N	O=C(NC=1C=NNC1)CN2C(=O)C=3C=CC=CC3N4C(=O)C=5C=CC=CC5C42	28.905	0.0002892	1.71795
1617	Positive	15.231	623.497	Unknown	[M+H]+	null	null	null	null	0.29673	0.00029015	1.67731
1618	Positive	0.43	360.793	Unknown	[M+H]+	null	null	null	null	44.652	0.00029028	1.54296
1619	Positive	14.38	461.264	no MS2: desferrioxamine H	[M+H]+	C20H36N4O8	N-acyl amines	VJQANBSDAGCDJE-UHFFFAOYSA-N	OC(CCC(NCCCCCN(C(CCC(NCCCCCN(C(C)=O)O)=O)=O)O)=O)=O	21.12	0.00029044	1.38167
1620	Positive	13.087	307.285	Unknown	[M+H]+	null	null	null	null	6.8732	0.00029044	1.31755
1621	Positive	1.044	756.79	Unknown	[M+H]+	null	null	null	null	5.7723	0.00029159	1.53823
1622	Positive	14.38	381.324	Unknown	[M+H]+	null	null	null	null	1167.8	0.00029314	1.53348
1623	Positive	6.303	279.184	no MS2: NCGC00385848-01_C19H24N2O_(3alpha,14alpha,16alpha)-14,15-Dihydroeburnamenin-14-ol	[M-H2O+H]+	C19H24N2O	Eburnan-type alkaloids	HONLKDDLTAZVQV-UHFFFAOYSA-N	CCC12CCCN3CCC4=C(C13)[N](C(O)C2)C5=CC=CC=C45	0.40591	0.00029314	1.22298
1624	Positive	0.396	263.885	Unknown	[M+H]+	null	null	null	null	22.555	0.00029318	1.08177
1625	Positive	0.426	224.879	Unknown	[M+H]+	null	null	null	null	109.41	0.00029378	1.63284
1626	Positive	1.038	768.818	Unknown	[M+H]+	null	null	null	null	5.3437	0.00029537	1.45962
1627	Positive	10.485	526.759	Unknown	[M+H]+	null	null	null	null	8.9654	0.00029666	1.12414
1628	Positive	1.664	324.239	Unknown	[M+H]+	null	null	null	null	0.39282	0.00029666	1.27084
1629	Positive	10.485	290.672	Unknown	[M+H]+	null	null	null	null	74.584	0.00030065	1.70585
1630	Positive	7.806	432.269	low score: NCGC00381130-01!methyl (2E,8E)-9-[3a-hydroxy-6,7-dimethyl-1-(2-methylpropyl)-3-oxo-2,4,7,7a-tetrahydro-1H-isoindol-4-yl]-4,5-dihydroxy-8-methylnona-2,8-dienoate [IIN-based on: CCMSLIB00000846918]	[M-H2O+H]+	C25H39NO6	Bicyclic monoterpenoids	YUXUTEAAGHFKKH-MKQCFFQWSA-N	COC(=O)\\C=C\\C(O)C(O)CC\\C(C)=C\\C1C=C(C)C(C)C2C(CC(C)C)NC(=O)C12O	31.199	0.00030184	1.49155
1631	Positive	12.402	221.168	low score: Prilocaine	[M+H]+	C13H20N2O	Alpha amino acid amides	MVFGUOIZUNYYSO-UHFFFAOYSA-N	C1=CC=CC(=C1C)NC(C(NCCC)C)=O	3.2662	0.00030261	1.19666
1632	Positive	0.432	240.849	Unknown	[M+H]+	null	null	null	null	182.37	0.00030381	1.66841
1633	Positive	9.02	497.982	Unknown	[M+H]+	null	null	null	null	10.739	0.00030393	1.53367
1634	Positive	1.023	708.86	Unknown	[M+H]+	null	null	null	null	5.9685	0.00030393	1.4378
1635	Positive	8.767	534.331	Unknown	[M+K]+	null	null	null	null	7.5178	0.00030393	1.02332
1636	Positive	1.029	810.849	Unknown	[M+H]+	null	null	null	null	6.0949	0.00030393	1.39474
1637	Positive	13.366	124.096	no MS2: HISTIDINOL	[M-H2O+H]+	C6H11N3O	Aralkylamines	ZQISRDCJNBUVMM-YFKPBYRVSA-N	N[C@H](CO)CC1=CN=CN1	8.8941	0.00030721	1.57943
1638	Positive	1.263	325.135	no MS2: Quinoxalinedione + 2Methyl + C5H11O4	[M+H-2H2O]+	C15H20N2O6	Quinoxalines	SLOQSNHEHSCLGS-UHFFFAOYSA-N	O=C2NC=1C=C(C(=CC=1N(C2(=O))CC(O)C(O)C(O)CO)C)C	3.8496	0.00030777	1.24352
1639	Positive	0.352	171.113	Unknown (carbon number 13); PlaSMA ID-399	[M+H]+	C13H14	Unknown	null	null	28.125	0.00031279	1.70151
1640	Positive	10.956	124.096	low score: HISTIDINOL	[M-H2O+H]+	C6H11N3O	Aralkylamines	ZQISRDCJNBUVMM-YFKPBYRVSA-N	N[C@H](CO)CC1=CN=CN1	3.4269	0.00031316	1.51801
1641	Positive	0.412	182.963	Unknown	[M+H]+	null	null	null	null	15.747	0.00031316	1.10172
1642	Positive	1.052	688.797	no MS2: (G)(NAM)-AemA;(G-G)-(NAG)(NAM)-None	[M+2H]2+	C54H89N9O32	N-acyl-alpha-hexosamines	AFRRQLYJLLLTBC-UHFFFAOYSA-N	CC(=O)NC1C(OC2C(CO)OC(O)C(NC(C)=O)C2OC(C)C(=O)O)OC(CO)C(OC2OC(CO)C(OC3OC(CO)C(O)C(O)C3N)C(OC(C)C(=O)NC(C)C(=O)NC(CCC(=O)NC(CCCC(N)C(=O)O)C(=O)NC(C)C(=O)O)C(=O)O)C2NC(C)=O)C1O	6.4564	0.00031316	1.33066
1643	Positive	6.385	401.283	Unknown	[M+H]+	null	null	null	null	2.4371	0.00031316	1.25109
1644	Positive	13.061	346.301	low score: Macamide B	[M+H]+	C23H39NO	N-acyl amines	MLGPKWUKOQAAGI-UHFFFAOYSA-N	O=C(NCC=1C=CC=CC1)CCCCCCCCCCCCCCC	0.31718	0.00031333	1.32805
1645	Positive	1.298	308.111	no MS2: NCGC00385493-01!methyl 7-(2-methylpropanoyloxy)-2-oxochromene-6-carboxylate [IIN-based: Match]	[M+NH4]+	C15H14O6	Coumarins and derivatives	VUVWVGLISBHUCV-UHFFFAOYSA-N	COC(=O)C1=C(OC(=O)C(C)C)C=C2OC(=O)C=CC2=C1	3.0772	0.00031398	1.28063
1646	Positive	1.059	788.751	Unknown	[M+H]+	null	null	null	null	8.4884	0.00031433	1.29055
1647	Positive	0.633	131.94	Unknown	[M+H]+	null	null	null	null	930.8	0.00031474	1.63205
1648	Positive	8.129	847.514	Unknown	[M+H]+	null	null	null	null	0.1495	0.00031485	1.30331
1649	Positive	6.495	465.299	low score: Pristimerin	[M+H]+	C30H40O4	Triterpenoids	JFACETXYABVHFD-WXPPGMDDSA-N	O=C1C=C2C(=CC=C3C2(C)CCC4(C)C5CC(C(=O)OC)(C)CCC5(C)CCC34C)C(=C1O)C	20.912	0.00031505	1.5762
1650	Positive	11.339	429.349	low score: (1S,2R,5R,6R,10R,13S,15S)-5-[(2R,3E,5R)-5,6-dimethylhept-3-en-2-yl]-6,10-dimethyl-16,17-dioxapentacyclo[13.2.2.0?,?.0?,?.0??,??]nonadec-18-en-13-ol	[M+H]+	C28H44O3	Ergostane steroids	VXOZCESVZIRHCJ-LNSUSAKYSA-N	OC1CCC2(C)C3CCC4(C)C(CCC4C53OOC2(C=C5)C1)C(C=CC(C)C(C)C)C	4.9213	0.00031648	1.22738
1651	Positive	1.016	750.846	Unknown	[M+H]+	null	null	null	null	29.067	0.00031666	1.63476
1652	Positive	1.724	371.124	no MS2: 1-[2-hydroxy-4-(3-hydroxy-5-methylphenoxy)-6-methylphenyl]-3-methylbutane-2,3-diol	[M+K]+	C19H24O5	Diphenylethers	FLLRZSQAKUHACV-UHFFFAOYSA-N	OC=1C=C(OC2=CC(O)=C(C(=C2)C)CC(O)C(O)(C)C)C=C(C1)C	4.407	0.00031666	1.44467
1653	Positive	0.685	274.073	no MS2: Tolcapone	[M+H]+	C14H11NO5	Benzophenones	MIQPIUSUKVNLNT-UHFFFAOYSA-N	C1(C(C2=CC=C(C=C2)C)=O)C=C(C(=C(C=1)O)O)[N+](=O)[O-]	14.749	0.00031738	1.52074
1654	Positive	14.485	478.446	Unknown	[M+H]+	null	null	null	null	0.22877	0.00031738	1.4631
1655	Positive	8.992	772.02	Unknown	[M+H]+	null	null	null	null	26.09	0.00031738	1.46481
1656	Positive	1.02	684.849	Unknown	[M+H]+	null	null	null	null	21.069	0.00031786	1.4994
1657	Positive	13.71	504.433	Unknown	[M+H]+	null	null	null	null	0.32976	0.00031795	1.45412
1658	Positive	14.569	783.665	Unknown	[M+H]+	null	null	null	null	0.36395	0.00031821	1.14501
1659	Positive	1.04	808.886	Unknown	[M+H]+	null	null	null	null	3.6752	0.00031951	1.10939
1660	Positive	6.455	421.27	low score: Maytenin	[M+H]+	C28H36O3	Cyclic ketones	WSTYNZDAOAEEKG-JCNSEWGNSA-N	O=C1C[C@]2(C)CC[C@]3(C)C([C@@]4(C)CC[C@@]3(C)C2C[C@H]1C)=CC=C(C4=C5)C(C)=C(O)C5=O	15.909	0.00031966	1.65237
1661	Positive	6.763	279.184	no MS2: NCGC00385848-01_C19H24N2O_(3alpha,14alpha,16alpha)-14,15-Dihydroeburnamenin-14-ol	[M-H2O+H]+	C19H24N2O	Eburnan-type alkaloids	HONLKDDLTAZVQV-UHFFFAOYSA-N	CCC12CCCN3CCC4=C(C13)[N](C(O)C2)C5=CC=CC=C45	0.42247	0.00032014	1.2013
1662	Positive	1.092	892.734	Unknown	[M+H]+	null	null	null	null	9.2722	0.00032426	1.35613
1663	Positive	16.502	223.079	no MS2: 2-methylanthra-9,10-quinone	[M+H]+	C15H10O2	Anthraquinones	NJWGQARXZDRHCD-UHFFFAOYSA-N	O=C1C=2C=CC=CC2C(=O)C3=CC(=CC=C13)C	16.453	0.00032455	1.12035
1664	Positive	15.23	423.28	low score: Unknown (carbon number 24); PlaSMA ID-2302	[M+H]+	C24H38O6	Unknown	null	null	7.5015	0.00032597	1.27681
1665	Positive	0.376	222.864	Unknown	[M+H]+	null	null	null	null	10.513	0.00032597	1.48646
1666	Positive	1.072	720.762	Unknown	[M+H]+	null	null	null	null	6.122	0.00032597	1.32367
1667	Positive	9.664	714.345	Unknown	[M+H]+	null	null	null	null	0.3072	0.00032597	1.46124
1668	Positive	6.482	301.163	low score: 1-[4,5-bis(hydroxymethyl)-3-methoxy-2-methylphenoxy]-3-methylbutane-2,3-diol	[M+H]+	C15H24O6	Benzyl alcohols	MAQMWSUGBCIGLJ-UHFFFAOYSA-N	OCC1=CC(OCC(O)C(O)(C)C)=C(C(OC)=C1CO)C	0.49413	0.00032597	1.15276
1669	Positive	1.039	870.771	no MS2: Triacylglycerol 16:1-18:2-18:2	[M+NH4]+	C55H96O6	Triacylglycerols	BNOFKGXXHHZEMK-VJZQUVOGSA-N	C(CC(OCC(OC(CCC=CCC=CCCCCCCCCCC)=O)COC(CCC=CCC=CCCCCCCCCCC)=O)=O)C=CCCCCCCCCCCC	7.7838	0.00032597	1.3912
1670	Positive	18.112	576.526	Unknown	[M+H]+	null	null	null	null	0.31084	0.00032613	1.32068
1671	Positive	9.584	643.326	low score: Rubusoside	[M+H]+	C32H50O13	Steviol glycosides	YWPVROCHNBYFTP-AKEPRJKISA-N	O=C(OC1OC(CO)C(O)C(O)C1O)C2(C)CCCC3(C)C2CCC45CC(=C)C(OC6OC(CO)C(O)C(O)C6O)(CCC43)C5	12.23	0.00032737	1.4813
1672	Positive	0.427	382.844	Unknown	[M+H]+	null	null	null	null	13.977	0.0003295	1.49292
1673	Positive	1.022	940.888	Unknown	[M+H]+	null	null	null	null	10.746	0.00032963	1.21361
1674	Positive	1.741	235.222	low score: (1R,2R,5R,7S)-2-cyclopentyl-5,7-dimethyl-1,3-diazaadamantane	[M+H]+	C15H26N2	Diazinanes	ZKHXDVJFFSPXFK-QKDCVEJESA-N	N12CC3(C)CN(CC(C)(C1)C3)C2C4CCCC4	5.976	0.00033016	1.62873
1675	Positive	18.411	223.079	no MS2: 2-methylanthra-9,10-quinone	[M+H+Na]2+	C15H10O2	Anthraquinones	NJWGQARXZDRHCD-UHFFFAOYSA-N	O=C1C=2C=CC=CC2C(=O)C3=CC(=CC=C13)C	15.358	0.00033199	1.21847
1676	Positive	10.551	704.285	low score: (S)-2-(((S)-7-acetamido-1,2,3-trimethoxy-9-oxo-5,6,7,9-tetrahydrobenzo[a]heptalen-10-yl)amino)-N-(2-(3-hydroxy-2-oxoquinoxalin-1(2H)-yl)ethyl)-4-(methylthio)butanamide	[M+H]+	C36H41N5O8S	Methionine and derivatives	YSPKLVVMZUKLMR-IGKIAQTJSA-N	O=C1C=C2C(=CC=C1NC(C(=O)NCCN3C(=O)C(O)=NC=4C=CC=CC43)CCSC)C5=C(OC)C(OC)=C(OC)C=C5CCC2NC(=O)C	19.156	0.00033218	1.4085
1677	Positive	8.529	546.83	Unknown	[M+H]+	null	null	null	null	20.698	0.00033374	1.43641
1678	Positive	1.023	898.855	Unknown	[M+H]+	null	null	null	null	13.538	0.00033454	1.37648
1679	Positive	1.056	813.877	Unknown	[M+H]+	null	null	null	null	4.4038	0.0003352	1.30929
1680	Positive	9.174	570.322	low score: 3-[(3R,5S,10R,13R,14S,17R)-5,14-dihydroxy-10,13-dimethyl-3-[(2R,3R,4S,5S,6R)-3,4,5-trihydroxy-6-(hydroxymethyl)oxan-2-yl]oxy-2,3,4,6,7,8,9,11,12,15,16,17-dodecahydro-1H-cyclopenta[a]phenanthren-17-yl]-2H-furan-5-one	[M+NH4]+	C29H44O10	Cardenolide glycosides and derivatives	FECZMYDDHKVQIA-MHLHJPRMSA-N	O=C1OCC(=C1)C2CCC3(O)C4CCC5(O)CC(OC6OC(CO)C(O)C(O)C6O)CCC5(C)C4CCC23C	25.329	0.00033612	1.22571
1681	Positive	10.962	428.416	Unknown	[M+H]+	null	null	null	null	0.28935	0.00033612	1.20351
1682	Positive	0.376	368.795	Unknown	[M+H]+	null	null	null	null	16.814	0.00033963	1.0446
1683	Positive	7.982	468.351	low score: Xefoampeptide D	[M+H]+	C25H45N3O5	Cyclic depsipeptides	VYFBCKJPZMCFAW-LSNYBQGISA-N	O=C1NC(C(C)(C)C)C(OC(CCCC)CC(N[C@H](CC(C)C)C(N[C@H]1CC(C)C)=O)=O)=O	0.34084	0.00034027	1.32474
1684	Positive	8.553	602.315	no MS2: NCGC00384679-01_C33H44O9_(1S,2S,3aR,4S,5S,6E,9R,11R,12E,13aS)-4,9,11-Triacetoxy-3a-hydroxy-2,5,8,8,12-pentamethyl-2,3,3a,4,5,8,9,10,11,13a-decahydro-1H-cyclopenta[12]annulen-1-yl benzoate	[M+NH4]+	C33H44O9	Jatrophane and cyclojatrophane diterpenoids	BRVXVMOWTHQKHC-LKCWGRRXSA-N	C[C@H]1C[C@]2(O)[C@@H](OC(C)=O)[C@@H](C)/C=C/C(C)(C)[C@@H](C[C@@H](OC(C)=O)\C(=C\[C@H]2[C@H]1OC(=O)C3=CC=CC=C3)C)OC(C)=O	9.6151	0.00034122	1.34407
1685	Positive	9.005	592.27	low score: (1S,2R,4S,9R,10R,14S,15S,17S)-9-(furan-3-yl)-1-hydroxy-15-[(1R)-1-hydroxy-2-methoxy-2-oxoethyl]-10,14,16,16-tetramethyl-7,18-dioxo-3,8-dioxapentacyclo[12.3.1.0?,?.0?,??.0?,??]octadecan-17-yl propanoate	[M+NH4]+	C30H38O11	Limonoids	FZBGZDZLYSLJFE-MVAMGWTESA-N	O=C(OC1C2(O)C(=O)C(C)(C3CCC4(C)C(OC(=O)CC4C53OC25)C6=COC=C6)C(C(O)C(=O)OC)C1(C)C)CC	15.446	0.00034184	1.46275
1686	Positive	0.44	275.841	Unknown	[M+H]+	null	null	null	null	72.48	0.00034188	1.39089
1687	Positive	0.089	237.222	no MS2: Velvione	[M+H]+	C16H28O	Cyclic ketones	ABRIMXGLNHCLIP-UHFFFAOYSA-N	O=C1CCCCCCCCCCC=CCCC1	8.4593	0.00034306	1.40659
1688	Positive	1.018	818.835	Unknown	[M+H]+	null	null	null	null	30.619	0.00034306	1.52665
1689	Positive	6.557	419.254	low score: Ophiopogonoside A	[M+H]+	C21H38O8	Terpene glycosides	DQRUOTCFENUXKV-UHFFFAOYSA-N	OCC1OC(OC2C(CCC3(C)C(O)CCC(O)(C)C23)C(C)C)C(O)C(O)C1O	7.7772	0.00034401	1.29418
1690	Positive	0.705	166.911	Unknown	[M+H]+	null	null	null	null	22.487	0.00034428	1.66367
1691	Positive	14.422	367.313	low score: Batyl Alcohol	[M+Na]+	C21H44O3	Monoalkylglycerols	OGBUMNBNEWYMNJ-UHFFFAOYSA-N	OCC(O)COCCCCCCCCCCCCCCCCCC	0.35782	0.00034514	1.30228
1692	Positive	0.348	156.963	Unknown	[M+H]+	null	null	null	null	7.0205	0.00034678	1.25147
1693	Positive	0.685	245.821	Unknown	[M+H]+	null	null	null	null	72.776	0.00034678	1.72242
1694	Positive	1.179	218.155	low score: Ethoxyquin	[M+H]+	C14H19NO	Hydroquinolones	DECIPOUIJURFOJ-UHFFFAOYSA-N	CCOC1=CC2=C(C=C1)NC(C=C2C)(C)C	0.42394	0.00034678	1.16837
1695	Positive	8.554	654.353	no MS2: Taxuspine Z	[M+H]+	C37H51NO9	Taxanes and derivatives	CKXBHBNBEFREKT-LTHGSNFJSA-N	O=C(OC1C(=C2C(OC(=O)C)C(OC(=O)C)C3(C)CCC(OC(=O)CC(C=4C=CC=CC4)N(C)C)C(=C)C3C(O)C(C1)C2(C)C)C)C	6.5424	0.00034678	1.25232
1696	Positive	1.057	868.824	Unknown	[M+H]+	null	null	null	null	6.2912	0.0003479	1.39101
1697	Positive	14.319	640.631	Unknown	[M+H]+	null	null	null	null	8.9403	0.00034865	1.31051
1698	Positive	1.091	862.773	no MS2: Triacylglycerol 15:0-18:1-18:1	[M+NH4]+	C54H100O6	Triacylglycerols	HLOSJHYMSBYQBB-KKBFQYJISA-N	C(=CCCCCCCCCCCCCC)CCC(OC(COC(CCCCCCCCCCCCCC)=O)COC(CCC=CCCCCCCCCCCCCC)=O)=O	3.5223	0.00034963	1.02796
1699	Positive	11.058	538.425	Unknown	[M+H]+	null	null	null	null	6.3993	0.00034973	1.50794
1700	Positive	9.275	808.552	Unknown	[M+H]+	null	null	null	null	0.30965	0.00034973	1.41586
1701	Positive	12.267	329.272	low score: 1,2-dihydroxyheptadec-16-en-4-yl acetate_major	[M+H]+	C19H36O4	Long-chain fatty alcohols	MFLWBVVCOWPUBA-UHFFFAOYSA-N	C=CCCCCCCCCCCCC(CC(O)CO)OC(C)=O	32.235	0.00035128	1.34433
1702	Positive	0.415	148.098	low score: Mevalonic Acid Lactone	[M+NH4]+	C6H10O3	Delta valerolactones	JYVXNLLUYHCIIH-UHFFFAOYSA-N	O=C1OCCC(O)(C)C1	4.0603	0.00035347	1.18127
1703	Positive	13.079	415.37	Unknown	[M+H]+	null	null	null	null	4.2682	0.00035381	1.10266
1704	Positive	0.692	150.94	Unknown	[M+H]+	null	null	null	null	10.083	0.00035401	1.60739
1705	Positive	0.425	271.186	low score: Doxylamine	[M+H]+	C17H22N2O	Benzylethers	HCFDWZZGGLSKEP-UHFFFAOYSA-N	CC(C1=CC=CC=C1)(C2=CC=CC=N2)OCCN(C)C	10.358	0.00035426	1.46389
1706	Positive	0.429	242.847	Unknown	[M+H]+	null	null	null	null	192.18	0.00035465	1.6618
1707	Positive	14.834	369.379	low score: tetracosanoic acid	[M+H]+	C24H48O2	Very long-chain fatty acids	QZZGJDVWLFXDLK-UHFFFAOYSA-N	O=C(O)CCCCCCCCCCCCCCCCCCCCCCC	96.624	0.00035571	1.37509
1708	Positive	1.08	874.716	Unknown	[M+H]+	null	null	null	null	5.0832	0.00035632	1.16345
1709	Positive	0.45	135.935	Unknown	[M+H]+	null	null	null	null	274.59	0.00035654	1.59499
1710	Positive	0.301	212.132	low score: Mescaline	[M+H]+	C11H17NO3	Phenethylamines	RHCSKNNOAZULRK-UHFFFAOYSA-N	COC1=CC(=CC(=C1OC)OC)CCN	11.257	0.00035658	1.45947
1711	Positive	13.954	284.315	Unknown	[M+H]+	null	null	null	null	20.229	0.00035741	1.38226
1712	Positive	1.053	940.806	Unknown	[M+H]+	null	null	null	null	5.3451	0.00035769	1.18411
1713	Positive	14.303	397.297	low score: Unknown (carbon number 27); PlaSMA ID-2179	[M+H]+	C27H40O2	Unknown	null	null	48.449	0.00036188	1.32613
1714	Positive	6.045	205.102	low score: Tryptophan	[M+H]+	C11H12N2O2	Indolyl carboxylic acids and derivatives	QIVBCDIJIAJPQS-UHFFFAOYSA-N	C1=CC=C2C(=C1)C(=CN2)CC(C(=O)O)N	0.46896	0.00036328	1.19602
1715	Positive	6.443	354.274	low score: 14-hydroxy-14-(hydroxymethyl)-5,9-dimethyltetracyclo[11.2.1.0?,??.0?,?]hexadecane-5-carboxylic acid	[M+NH4]+	C20H32O4	Kaurane diterpenoids	MRBLTWPEPGRXQN-UHFFFAOYSA-N	O=C(O)C1(C)CCCC2(C)C1CCC34CC(CCC32)C(O)(CO)C4	4.1506	0.00036446	1.55365
1716	Positive	14.308	515.297	no MS2: "(6R)-2-hydroxy-2-methyl-6-((3R,5S,7R,8R,9S,10S,12S,13R,14S,17R)-3,7,12-trihydroxy-10,13-dimethylhexadecahydro-1H-cyclopenta[a]phenanthren-17-yl)heptyl hydrogen sulfate"	[M-H2O+H]+	C27H48O8S	Tetrahydroxy bile acids, alcohols and derivatives	UTBBBXZUPUXYGZ-RMOKHKHISA-N	O[C@@H](C1)CC[C@@]2(C)[C@]1([H])C[C@@H](O)[C@]3([H])[C@]2([H])C[C@H](O)[C@@]4(C)[C@@]3([H])CC[C@@]4([C@H](C)CCCC(O)(C)COS(=O)(O)=O)[H]	9.1358	0.00036492	1.37384
1717	Positive	8.761	496.377	1-O-hexadecyl-2-C-methyl-3-phosphatidylcholine	[M+H]+	C25H54NO6P	Glycerophosphocholines	BZLKOORCGCYQJZ-UHFFFAOYSA-N	CCCCCCCCCCCCCCCCOCC(C)(COP(=O)([O-])OCC[N+](C)(C)C)O	573.75	0.00036559	1.68516
1718	Negative	1.275	517.152	low score: [(2S,3S,4R,5R)-4-hydroxy-2,5-bis(hydroxymethyl)-2-[(2R,3R,4S,5S,6R)-3,4,5-trihydroxy-6-(hydroxymethyl)oxan-2-yl]oxyoxolan-3-yl] (E)-3-(4-hydroxy-3-methoxyphenyl)prop-2-enoate	[M-H]-	C22H30O14	Coumaric acids and derivatives	ZPEADZHVGOCGKH-YQTDNFGYSA-N	O=C(OC1C(O)C(OC1(OC2OC(CO)C(O)C(O)C2O)CO)CO)C=CC3=CC=C(O)C(OC)=C3	0.21796	0.0003659	1.38809
1719	Positive	13.601	395.249	low score: "(R)-4-((8S,9S,10R,13R,14S,17R)-10,13-dimethyl-3-oxo-2,3,6,7,8,9,10,11,12,13,14,15,16,17-tetradecahydro-1H-cyclopenta[a]phenanthren-17-yl)pentanoic acid"	[M+Na]+	C24H36O3	Bile acids, alcohols and derivatives	WCFIGQHNBJXROP-IHMUCKAYSA-N	C[C@@H]([C@H]1CC[C@]2([H])[C@]1(C)CC[C@@]3([H])[C@@]2([H])CCC([C@]3(C)CC4)=CC4=O)CCC(O)=O	16.681	0.00036625	1.08357
1720	Positive	1.081	652.762	Unknown	[M+H]+	null	null	null	null	7.5984	0.00036738	1.4729
1721	Positive	0.426	432.199	low score: Lafutidine	[M+H]+	C22H29N3O4S	Alkyl aryl ethers	KMZQAVXSMUKBPD-DJWKRKHSSA-N	C1=C(N=CC=C1CN2CCCCC2)OC/C=C\CNC(CS(=O)CC3=CC=CO3)=O	45.785	0.00036808	1.42062
1722	Positive	1.063	952.736	Unknown	[M+H]+	null	null	null	null	6.4593	0.00036882	1.31463
1723	Positive	8.836	301.167	low score: 1-[4,5-bis(hydroxymethyl)-3-methoxy-2-methylphenoxy]-3-methylbutane-2,3-diol	[M+H]+	C15H24O6	Benzyl alcohols	MAQMWSUGBCIGLJ-UHFFFAOYSA-N	OCC1=CC(OCC(O)C(O)(C)C)=C(C(OC)=C1CO)C	0.47003	0.00036888	1.19709
1724	Positive	1.024	565.013	Unknown	[M+H]+	null	null	null	null	4.1444	0.00037117	1.28678
1725	Positive	6.474	460.308	Unknown	[M+H]+	null	null	null	null	3.938	0.00037185	1.01595
1726	Positive	0.592	107.915	Unknown	[M+H]+	null	null	null	null	33.864	0.00037211	1.56978
1727	Positive	0.473	133.939	Unknown	[M+H]+	null	null	null	null	639.43	0.00037211	1.64198
1728	Positive	0.425	370.273	Unknown	[M+H]+	null	null	null	null	36.789	0.00037211	1.55359
1729	Positive	1.032	866.77	Unknown	[M+H]+	null	null	null	null	14.639	0.00037211	1.42784
1730	Positive	7.118	970.212	Unknown	[M+H]+	null	null	null	null	0.34609	0.00037257	1.4668
1731	Positive	0.426	263.911	Unknown	[M+H]+	null	null	null	null	48.615	0.00037272	1.46396
1732	Positive	12.171	417.357	Unknown	[M+H]+	null	null	null	null	0.32922	0.00037378	1.46301
1733	Positive	8.558	521.179	Unknown	[M+H]+	null	null	null	null	3.8545	0.00037491	1.07148
1734	Positive	8.364	564.286	Unknown	[M+H]+	null	null	null	null	5.1737	0.00037496	1.18924
1735	Positive	1.371	389.289	low score: methyl 4-((10R,13R)-3-hydroxy-10,13-dimethyl-2,3,4,7,8,9,10,11,12,13,14,15,16,17-tetradecahydro-1H-cyclopenta[a]phenanthren-17-yl)pentanoate	[M+H]+	C25H40O3	Monohydroxy bile acids, alcohols and derivatives	IMNIZYXAQQBADI-JMYVHVBSSA-N	O=C(OC)CCC(C)C1CCC2C3CC=C4CC(O)CCC4(C)C3CCC12C	0.33663	0.0003773	1.46106
1736	Positive	0.427	222.881	Unknown	[M+H]+	null	null	null	null	195.26	0.00037736	1.636
1737	Positive	14.38	285.301	Unknown	[M+H]+	null	null	null	null	19.269	0.00037747	1.37521
1738	Positive	18.825	557.495	Unknown	[M+H]+	null	null	null	null	0.32573	0.00037814	1.39921
1739	Positive	13.424	247.184	no MS2: Milnacipran	[M+H]+	C15H22N2O	Phenylacetamides	GJJFMKBJSRMPLA-HIFRSBDPSA-N	O=C(N(CC)CC)C1(C=2C=CC=CC2)CC1CN	43.366	0.00037913	1.74396
1740	Positive	0.439	271.851	Unknown	[M+H]+	null	null	null	null	113.46	0.00037913	1.35818
1741	Positive	6.229	205.106	no MS2: MMV393995	[M+H]+	C10H12N4O	Pyrimidones	XIFVEJXUSTTZKD-UHFFFAOYSA-N	OC=1N=C(N=C(C1)C)N2N=C(C=C2C)C	0.43335	0.00037937	1.16205
1742	Positive	1.185	453.991	Unknown	[M+H]+	null	null	null	null	7.8202	0.00038032	1.34814
1743	Positive	1.019	736.912	Unknown	[M+H]+	null	null	null	null	16.603	0.00038204	1.33158
1744	Positive	13.802	782.624	Unknown	[M+H]+	null	null	null	null	0.41393	0.00038247	1.30127
1745	Positive	10.516	707.251	low score: (2R,3S,4S,5R,6S)-2-(hydroxymethyl)-6-[4-[[(3S,4S)-4-(hydroxymethyl)-5-[3-methoxy-4-[(2S,3R,4S,5S,6R)-3,4,5-trihydroxy-6-(hydroxymethyl)oxan-2-yl]oxyphenyl]oxolan-3-yl]methyl]-2-methoxyphenoxy]oxane-3,4,5-triol	[M+Na]+	C32H44O16	Lignan glycosides	PBLWZMSRSJTRHJ-HVZZXTKSSA-N	OCC1OC(OC2=CC=C(C=C2OC)CC3COC(C4=CC=C(OC5OC(CO)C(O)C(O)C5O)C(OC)=C4)C3CO)C(O)C(O)C1O	35.105	0.00038277	1.337
1746	Positive	0.189	519.172	no MS2: [(2S,3S,4R,5R)-4-hydroxy-2,5-bis(hydroxymethyl)-2-[(2R,3R,4S,5S,6R)-3,4,5-trihydroxy-6-(hydroxymethyl)oxan-2-yl]oxyoxolan-3-yl] (E)-3-(4-hydroxy-3-methoxyphenyl)prop-2-enoate	[M+H]+	C22H30O14	Coumaric acids and derivatives	ZPEADZHVGOCGKH-YQTDNFGYSA-N	O=C(OC1C(O)C(OC1(OC2OC(CO)C(O)C(O)C2O)CO)CO)C=CC3=CC=C(O)C(OC)=C3	60.24	0.00038288	1.35629
1747	Positive	1.034	766.824	Unknown	[M+H]+	null	null	null	null	6.9896	0.00038642	1.5244
1748	Positive	1.262	290.097	no MS2: NCGC00384658-01!7-methoxy-8-(3-methyl-5-oxo-2H-furan-4-yl)chromen-2-one	[M+NH4]+	C15H12O5	Coumarins and derivatives	AZYVCLJYWIHOAD-UHFFFAOYSA-N	COC1=CC=C2C=CC(=O)OC2=C1C3=C(C)COC3=O	6.8326	0.00038719	1.28547
1749	Positive	0.441	262.879	Unknown	[M+H]+	null	null	null	null	27.371	0.00038847	1.1483
1750	Positive	14.304	381.326	Unknown	[M+H]+	null	null	null	null	1033.6	0.000389	1.49879
1751	Positive	0.521	148.942	Unknown	[M+H]+	null	null	null	null	42.156	0.00039064	1.55222
1752	Positive	0.441	151.949	Unknown	[M+H]+	null	null	null	null	17.801	0.0003907	1.37726
1753	Positive	18.825	521.416	Unknown	[M+H]+	null	null	null	null	0.32755	0.00039301	1.44051
1754	Positive	9	267.669	Unknown	[M+H]+	null	null	null	null	23.668	0.00039584	1.33196
1755	Positive	9.987	538.424	Unknown	[M+H]+	null	null	null	null	0.3457	0.00039746	1.33361
1756	Positive	14.38	358.223	no MS2: NCGC00347635-02![5-acetyloxy-3-(hydroxymethyl)-2-oxo-6-propan-2-ylcyclohex-3-en-1-yl] 3-methylpentanoate	[M+NH4]+	C18H28O6	Menthane monoterpenoids	MPXXSICHRNCHHK-UHFFFAOYSA-N	CCC(C)CC(=O)OC1C(C(C)C)C(OC(C)=O)C=C(CO)C1=O	9.1312	0.00039824	1.11968
1757	Positive	1.035	868.769	Unknown	[M+H]+	null	null	null	null	29.275	0.00040097	1.4638
1758	Positive	0.565	309.854	Unknown	[M+H]+	null	null	null	null	11.282	0.00040132	1.10834
1759	Positive	0.39	289.198	low score: 4-((1R,3S,5r,7r)-5,7-dimethyl-1,3-diazaadamantan-2-yl)-2-methoxyphenol	[M+H]+	C17H24N2O2	Methoxyphenols	LATQZYGIAROYHX-UHFFFAOYSA-N	OC1=CC=C(C=C1OC)C2N3CC4(C)CN2CC(C)(C3)C4	33.743	0.00040188	1.52829
1760	Positive	8.402	627.337	low score: NCGC00169348-03!(3Z)-3-[[5-(2-methylbut-3-en-2-yl)-1H-imidazol-4-yl]methylidene]-6-propan-2-ylpiperazine-2,5-dione [IIN-based on: CCMSLIB00000848599]	[2M+Na]+	C16H22N4O2	Alpha amino acids and derivatives	RSGRSUVVCYUKLM-XFFZJAGNSA-N	CC(C)C1NC(=O)\\C(NC1=O)=C\\C2=C(NC=N2)C(C)(C)C=C	9.8316	0.00040205	1.25568
1761	Positive	8.43	516.282	Unknown	[M+H]+	null	null	null	null	6.9585	0.000403	1.0075
1762	Positive	14.546	567.348	Unknown	[M+H]+	null	null	null	null	0.30217	0.00040406	1.44927
1763	Positive	1.038	562.843	Unknown	[M+H]+	null	null	null	null	6.9979	0.00040593	1.42688
1764	Positive	0.312	419.343	low score: "(3R,5R,7R,9S,10S,12S,13R,14S,17R)-17-((2R)-7-hydroxy-6-methylheptan-2-yl)-10,13-dimethylhexadecahydro-1H-cyclopenta[a]phenanthrene-3,7,12-triol"	[M-H2O+H]+	C27H48O4	Tetrahydroxy bile acids, alcohols and derivatives	XJZGNVBLVFOSKJ-PLAINUPSSA-N	C[C@H](CCCC(C)CO)[C@H]1CC[C@H]2[C@]([C@@H]3C[C@H](O)[C@@]21C)([H])[C@H](O)C[C@]4([H])[C@]3(C)CC[C@@H](O)C4	0.35064	0.00040737	1.47425
1765	Positive	12.511	353.291	Unknown	[M+H]+	null	null	null	null	201.74	0.0004111	1.52409
1766	Positive	12.489	467.265	Unknown	[M+H]+	null	null	null	null	10.325	0.00041674	1.10569
1767	Positive	1.202	274.292	Unknown	[M+H]+	null	null	null	null	75.048	0.00041688	1.56654
1768	Positive	1.061	760.789	Unknown	[M+H]+	null	null	null	null	2.9015	0.00041822	1.18138
1769	Positive	1.024	810.807	Unknown	[M+H]+	null	null	null	null	29.518	0.0004204	1.47289
1770	Positive	1.076	914.697	Unknown	[M+H]+	null	null	null	null	5.853	0.00042578	1.09867
1771	Positive	15.523	124.096	HISTIDINOL	[M-H2O+H]+	C6H11N3O	Aralkylamines	ZQISRDCJNBUVMM-YFKPBYRVSA-N	N[C@H](CO)CC1=CN=CN1	8.1239	0.00042652	1.52899
1772	Positive	0.401	330.229	low score: (1-(5-Fluoropentyl)-1H-indol-3-yl)(2,2,3,3-tetramethylcyclopropyl)methanone	[M+H]+	C21H28FNO	N-alkylindoles	PXLDPUUMIHVLEC-UHFFFAOYSA-N	CC1(C(C1(C)C)C(=O)C2=CN(C3=CC=CC=C32)CCCCCF)C	18.728	0.00042652	1.32829
1773	Positive	0.449	139.933	Unknown	[M+H]+	null	null	null	null	25.202	0.00042665	1.42026
1774	Positive	10.066	508.413	Unknown	[M+H]+	null	null	null	null	0.33685	0.00042677	1.35292
1775	Positive	7.02	432.268	low score: Marineosin A	[M+Na]+	C25H35N3O2	Oxanes	JPTGQNMDWMSVSF-DUENCVSESA-N	[H][C@]12C[C@H](C)O[C@]3(N=C(C[C@H]3OC)C3=CC=CN3)[C@]1([H])C1=CC=C(CCCCCCC2)N1	9.0938	0.00042677	1.23734
1776	Positive	8.989	498.97	Unknown	[M+H]+	null	null	null	null	17.107	0.00042781	1.65322
1777	Positive	17.949	223.08	no MS2: 2-methylanthra-9,10-quinone	[M+H]+	C15H10O2	Anthraquinones	NJWGQARXZDRHCD-UHFFFAOYSA-N	O=C1C=2C=CC=CC2C(=O)C3=CC(=CC=C13)C	14.932	0.00042781	1.17972
1778	Positive	9.779	508.413	Unknown	[M+H]+	null	null	null	null	56.971	0.00043004	1.62341
1779	Positive	1.065	841.857	Unknown	[M+H]+	null	null	null	null	3.8216	0.00043004	1.12712
1780	Positive	0.744	273.816	Unknown	[M+H]+	null	null	null	null	159.78	0.000431	1.78542
1781	Positive	8.869	542.361	low score: NCGC00381175-01!3-hydroxy-2-[[3-[3-(3-hydroxy-6-methylheptanoyl)oxy-6-methylheptanoyl]oxy-8-methylnonanoyl]amino]propanoic acid [IIN-based on: CCMSLIB00000848442]	[M-H2O+H]+	C29H53NO9	N-acyl-alpha amino acids	MWZPHNZNPKKSEI-UHFFFAOYSA-N	CC(C)CCCCC(CC(=O)NC(CO)C(O)=O)OC(=O)CC(CCC(C)C)OC(=O)CC(O)CCC(C)C	0.27877	0.0004312	1.26268
1782	Positive	7.722	376.287	Unknown	[M+H]+	null	null	null	null	35.363	0.00043126	1.456
1783	Positive	0.584	276.824	Unknown	[M+H]+	null	null	null	null	141.85	0.00043355	1.62343
1784	Positive	8.534	799.532	Unknown	[M+H]+	null	null	null	null	9.4277	0.00043355	1.27427
1785	Positive	1.026	862.866	Unknown	[M+H]+	null	null	null	null	15.369	0.00043459	1.29343
1786	Positive	7.766	661.415	Unknown	[M+H]+	null	null	null	null	11.794	0.00043477	1.37935
1787	Positive	1.517	370.272	Unknown	[M+H]+	null	null	null	null	10.408	0.00043571	1.28596
1788	Positive	1.026	753.857	Unknown	[M+H]+	null	null	null	null	4.7745	0.0004384	1.33548
1789	Positive	9.813	204.153	Unknown	[M+H]+	null	null	null	null	4.519	0.0004391	1.05959
1790	Positive	10.486	371.131	low score: Ajugol	[M+Na]+	C15H24O9	Iridoid O-glycosides	VELYAQRXBJLJAK-XKKWFBPMSA-N	OCC1OC(OC2OC=CC3C(O)CC(O)(C)C23)C(O)C(O)C1O	6.8614	0.00043926	1.58841
1791	Positive	6.116	771.346	Unknown	[M+H]+	null	null	null	null	36.81	0.00044057	0.920455
1792	Positive	1.035	738.914	Unknown	[M+H]+	null	null	null	null	8.072	0.00044084	1.35344
1793	Positive	8.382	282.298	Unknown	[M+H]+	null	null	null	null	4.9854	0.00044084	1.61385
1794	Negative	7.054	572.215	Unknown	[M-H]-	null	null	null	null	0.13269	0.00044194	1.24169
1795	Positive	1.051	790.743	Unknown	[M+H]+	null	null	null	null	14.538	0.00044361	1.51152
1796	Positive	0.528	245.823	Unknown	[M+H]+	null	null	null	null	81.771	0.00044465	1.73315
1797	Positive	0.355	157.094	low score: Unknown (carbon number 8); PlaSMA ID-275	[M+H]+	C8H12O3	Unknown	null	null	8.8432	0.0004451	1.51729
1798	Positive	1.035	494.85	Unknown	[M+H]+	null	null	null	null	5.9353	0.0004451	1.22802
1799	Positive	15.541	747.645	Unknown	[M+H]+	null	null	null	null	0.35012	0.0004451	1.40546
1800	Positive	0.429	281.88	Unknown	[M+H]+	null	null	null	null	99.833	0.00044704	1.54837
1801	Positive	1.024	698.831	Unknown	[M+H]+	null	null	null	null	8.2969	0.00044704	1.41389
1802	Positive	13.34	367.279	no MS2: Kalkitoxin	[M+H]+	C21H38N2OS	N-acyl amines	PHYRFZDJEDWWKT-UJWQCDCRSA-N	CC[C@@H](C)C(=O)N(C)CC[C@@H](C)C[C@H](C)[C@H](C)CC1=N[C@@H](CS1)C=C	0.33176	0.00045004	1.29508
1803	Positive	11.91	484.508	Unknown	[M+H]+	null	null	null	null	8.4478	0.0004513	1.32376
1804	Positive	14.313	472.433	Unknown	[M+H]+	null	null	null	null	6.0803	0.00045165	0.987048
1805	Positive	7.941	279.184	no MS2: NCGC00385848-01_C19H24N2O_(3alpha,14alpha,16alpha)-14,15-Dihydroeburnamenin-14-ol	[M-H2O+H]+	C19H24N2O	Eburnan-type alkaloids	HONLKDDLTAZVQV-UHFFFAOYSA-N	CCC12CCCN3CCC4=C(C13)[N](C(O)C2)C5=CC=CC=C45	0.44863	0.00045182	1.1456
1806	Positive	12.511	257.267	Unknown	[M+H]+	null	null	null	null	12.662	0.00045197	1.45414
1807	Positive	15.763	413.293	low score: 2-methyl-2-(3-pentadecylphenoxy)propanoic acid	[M+Na]+	C25H42O3	Phenoxyacetic acid derivatives	SQSAOEAQCNWNBE-UHFFFAOYSA-N	O=C(O)C(C)(C)OC1=CC(CCCCCCCCCCCCCCC)=CC=C1	3.844	0.00045228	1.6278
1808	Positive	10.495	732.318	no MS2: NCGC00385467-01_C37H46O14_(1S,2R,3R,4S,5S,7R,8R,9S,10S,14R)-1,8,16-Triacetoxy-2-(2-acetoxyacetoxy)-7-hydroxy-5,9,12,12-tetramethyl-13-oxotetracyclo[7.6.1.0~3,7~.0~10,14~]hexadec-4-yl benzoate	[M+NH4]+	C37H46O14	Hexacarboxylic acids and derivatives	GVQACOLUOBLBLO-BOSZVHHSSA-N	C[C@H]1C[C@]2(O)[C@H](OC(C)=O)C3(C)[C@H]4CC(C)(C)C(=O)[C@@H]4CC(OC(C)=O)([C@H](OC(=O)COC(C)=O)[C@H]2[C@H]1OC(=O)C5=CC=CC=C5)[C@@H]3OC(C)=O	6.1261	0.00045228	1.22483
1809	Positive	15.165	628.42	Unknown	[M+H]+	null	null	null	null	2.6617	0.00045348	1.19502
1810	Positive	8.53	548.84	Unknown	[M+H]+	null	null	null	null	28.459	0.00045542	1.50491
1811	Positive	0.101	373.128	no MS2: Tangeritin	[M+H]+	C20H20O7	8-O-methylated flavonoids	ULSUXBXHSYSGDT-UHFFFAOYSA-N	O=C1C=C(OC2=C(OC)C(OC)=C(OC)C(OC)=C12)C=3C=CC(OC)=CC3	15.993	0.00045542	1.49802
1812	Positive	8.533	552.367	low score: (3S,10R,13R)-10,13-dimethyl-17-octyl-2,3,4,7,8,9,10,11,12,13,14,15,16,17-tetradecahydro-1H-cyclopenta[a]phenanthren-3-yl (4-nitrophenyl) carbonate	[M+H]+	C34H49NO5	Androstane steroids	AFNDTSIACJAGSO-ZNBDOVCMSA-N	O=C(OC1=CC=C(C=C1)[N+](=O)[O-])OC2CC3=CCC4C(CCC5(C)C(CCCCCCCC)CCC45)C3(C)CC2	4.6634	0.00045706	1.28826
1813	Positive	1.046	664.79	Unknown	[M+H]+	null	null	null	null	13.793	0.00045754	1.50493
1814	Positive	18.089	772.302	Unknown	[M+H]+	null	null	null	null	9.3838	0.00045818	1.17154
1815	Positive	1.045	856.742	Unknown	[M+H]+	null	null	null	null	11.314	0.00045818	1.31706
1816	Positive	1.026	762.875	Unknown	[M+H]+	null	null	null	null	14.814	0.0004592	1.38646
1817	Positive	13.601	297.26	no MS2: 2-(N-butylpropionamido)-N-cyclohexylbutanamide	[M+H]+	C17H32N2O2	Tertiary carboxylic acid amides	QMXGNDITXNMQEK-UHFFFAOYSA-N	CCCCN(C(=O)CC)C(CC)C(=O)NC1CCCCC1	12.5	0.00045952	1.64496
1818	Positive	12.182	353.291	Unknown	[M+H]+	null	null	null	null	3.0284	0.0004601	1.54835
1819	Positive	8.898	504.343	low score: "((4R)-4-((3R,5S,7R,9S,10S,13R,14S,17R)-3,7-dihydroxy-10,13-dimethylhexadecahydro-1H-cyclopenta[a]phenanthren-17-yl)pentanoyl)-D-phenylalanine"	[M-2H2O+H]+	C33H49NO5	Glycinated bile acids and derivatives	CEMZGPKUKMFNNF-TUBYWNESSA-N	[H][C@@]12[C@H](O)C[C@@H]3C[C@H](O)CC[C@]3(C)[C@H]1CC[C@@]4(C)[C@H]2CC[C@@H]4[C@@H](CCC(N[C@H](CC5=CC=CC=C5)C(O)=O)=O)C	6.8159	0.00046352	1.37527
1820	Positive	10.485	526.555	Unknown	[M+H]+	null	null	null	null	8.2471	0.00046352	1.1105
1821	Positive	7.841	522.301	low score: Carmaphycin A enone analogue	[M+Na]+	C25H45N3O5S	Dipeptides	NHLBOKNHQIEJIH-IWHCYLEESA-N	CC(C([C@H](CC(C)C)NC([C@H](CCS(C)=O)NC([C@H](C(C)C)NC(CCCCC)=O)=O)=O)=O)=C	4.7392	0.00046387	1.13463
1822	Positive	1.016	624.889	Unknown	[M+H]+	null	null	null	null	27.933	0.00046469	1.5511
1823	Positive	1.035	852.838	Unknown	[M+H]+	null	null	null	null	11.498	0.00046469	1.3699
1824	Positive	13.818	297.261	no MS2: 2-(N-butylpropionamido)-N-cyclohexylbutanamide	[M+H]+	C17H32N2O2	Tertiary carboxylic acid amides	QMXGNDITXNMQEK-UHFFFAOYSA-N	CCCCN(C(=O)CC)C(CC)C(=O)NC1CCCCC1	14.506	0.00046939	1.71231
1825	Positive	0.409	165.125	low score: Unknown (carbon number 11); PlaSMA ID-343	[M+H]+	C11H16O	Unknown	null	null	6.5558	0.00046975	1.645
1826	Positive	8.521	522.176	no MS2: NCGC00384944-01_C21H28O14_	[M+NH4]+	C21H28O14	Monosaccharides	RQBYQAQHXGPEBG-UHFFFAOYSA-N	CC1=C(C)C(=C2OC3OC(C(O)C(O)C3O)C(O)C(O)C4OC(OC1=C2)C(O)C(O)C4O)C(O)=O	7.4589	0.00046975	1.0787
1827	Positive	7.801	484.302	low score: Taurolithocholate	[M+H]+	C26H45NO5S	Taurinated bile acids and derivatives	QBYUNVOYXHFVKC-GBURMNQMSA-N	C[C@H](CC/C(=N/CCS(=O)(=O)O)/O)[C@H]1CC[C@@H]2[C@@]1(CC[C@H]3[C@H]2CC[C@H]4[C@@]3(CC[C@H](C4)O)C)C	14.649	0.00046991	1.29292
1828	Positive	8.446	590.364	low score: "2-((4R)-N-benzyl-4-((3R,5S,7S,9S,10S,13R,14S,17R)-3,7-dihydroxy-10,13-dimethylhexadecahydro-1H-cyclopenta[a]phenanthren-17-yl)pentanamido)ethane-1-sulfonic acid"	[M+H]+	C33H51NO6S	Taurinated bile acids and derivatives	HVNRNWTTWOOXEC-KEWKXRTMSA-N	[H][C@@]12[C@@H](O)C[C@]3([H])C[C@H](O)CC[C@]3(C)[C@H]1CC[C@@]4(C)[C@H]2CC[C@@H]4[C@@H](CCC(N(CC5=CC=CC=C5)CCS(=O)(O)=O)=O)C	15.172	0.00047263	1.29455
1829	Positive	0.443	269.85	Unknown	[M+H]+	null	null	null	null	45.219	0.00047273	1.25107
1830	Positive	0.402	147.962	Unknown	[M+H]+	null	null	null	null	10.602	0.00047846	1.12653
1831	Positive	7.805	415.242	low score: Tentoxin	[M+H]+	C22H30N4O4	Oligopeptides	SIIRBDOFKDACOK-LFXZBHHUSA-N	C[C@H]1C(=O)N[C@H](C(=O)N(/C(=C\C2=CC=CC=C2)/C(=O)NCC(=O)N1C)C)CC(C)C	153.18	0.00047846	1.42739
1832	Positive	14.334	463.274	no MS2: NCGC00381101-01_C22H40O11_(3E)-7-Hydroxy-3,7-dimethyl-3-octen-1-yl 6-O-(6-deoxy-alpha-L-mannopyranosyl)-beta-D-glucopyranoside	[M-H2O+H]+	C22H40O11	Fatty acyl glycosides of mono- and disaccharides	VUGMGEQWBOCMAV-QLEKUEJFSA-N	C[C@@H]1O[C@@H](OC[C@H]2O[C@@H](OCC/C(C)=C/CCC(C)(C)O)[C@H](O)[C@@H](O)[C@@H]2O)[C@H](O)[C@H](O)[C@H]1O	12.365	0.00047951	1.1786
1833	Positive	14.85	136.034	no MS2: 2-Benzoxazolinone; CE0; ASSKVPFEZFQQNQ-UHFFFAOYSA-N	[M+H]+	C7H5NO2	Benzoxazolones	ASSKVPFEZFQQNQ-UHFFFAOYSA-N	c1ccc2c(c1)nc(O)o2	4.0206	0.00048011	1.53599
1834	Positive	6.13	349.209	low score: Bexarotene	[M+2Na-H]+	C24H28O2	Retinoids	NAVMQTYZDKMPEU-UHFFFAOYSA-N	CC1=CC2=C(C=C1C(=C)C3=CC=C(C=C3)C(=O)O)C(CCC2(C)C)(C)C	13.784	0.00048145	1.49493
1835	Positive	12.733	263.255	Unknown	[M+H]+	null	null	null	null	21.328	0.00048178	1.25739
1836	Positive	1.015	718.881	Unknown	[M+H]+	null	null	null	null	4.8909	0.00048189	1.18383
1837	Positive	1.023	876.804	no MS2: Triacylglycerol 16:0-18:1-18:1	[M+NH4]+	C55H102O6	Triacylglycerols	GVEDTRDLMYCMDC-QEEMTAIZSA-N	C(=CCCCCCCCCCCCCC)CCC(=O)OC(COC(CCC=CCCCCCCCCCCCCC)=O)COC(=O)CCCCCCCCCCCCCCC	24.439	0.0004834	1.44537
1838	Positive	12.097	329.272	low score: 1,2-dihydroxyheptadec-16-en-4-yl acetate_major	[M+H]+	C19H36O4	Long-chain fatty alcohols	MFLWBVVCOWPUBA-UHFFFAOYSA-N	C=CCCCCCCCCCCCC(CC(O)CO)OC(C)=O	203.71	0.00048596	1.48664
1839	Positive	1.013	692.885	Unknown	[M+H]+	null	null	null	null	26.077	0.00048715	1.61957
1840	Positive	0.452	703.623	Unknown	[M+H]+	null	null	null	null	4.6942	0.00048722	1.29898
1841	Positive	6.244	826.326	Unknown	[M+H]+	null	null	null	null	7.5811	0.000489	1.27401
1842	Positive	1.192	778.498	Unknown	[M+H]+	null	null	null	null	6.5752	0.00049037	1.2741
1843	Positive	14.335	136.032	no MS2: 2-Benzoxazolinone; CE0; ASSKVPFEZFQQNQ-UHFFFAOYSA-N	[M+H]+	C7H5NO2	Benzoxazolones	ASSKVPFEZFQQNQ-UHFFFAOYSA-N	c1ccc2c(c1)nc(O)o2	3.0241	0.00049263	1.56265
1844	Positive	7.07	387.21	low score: Sufentanil	[M+H]+	C22H30N2O2S	Anilides	GGCSSNBKKAUURC-UHFFFAOYSA-N	[H]C([H])([H])OC([H])([H])C(N(C(=O)C([H])([H])C([H])([H])[H])c(c([H])3)c([H])c([H])c([H])c([H])3)(C([H])([H])1)C([H])([H])C([H])([H])N(C([H])([H])C([H])([H])c(s2)c([H])c([H])c([H])2)C([H])([H])1	5.9997	0.00049436	1.22571
1845	Positive	0.449	137.932	Unknown	[M+H]+	null	null	null	null	58.666	0.00049494	1.49845
1846	Positive	14.443	284.314	Unknown	[M+H]+	null	null	null	null	4.7529	0.00049527	1.15679
1847	Positive	12.931	373.238	low score: 5-(5-methoxycarbonyl-5,8a-dimethyl-2-methylidene-3,4,4a,6,7,8-hexahydro-1H-naphthalen-1-yl)-3-methylpentanoic acid	[M+2Na-H]+	C21H34O4	Diterpenoids	WTDIRAZPDUAJEB-UHFFFAOYSA-N	O=C(O)CC(C)CCC1C(=C)CCC2C(C(=O)OC)(C)CCCC12C	0.28619	0.00049527	1.46878
1848	Positive	7.707	211.137	low score: Cyclo(proline-leucine)	[M+H]+	C11H18N2O2	Alpha amino acids and derivatives	SZJNCZMRZAUNQT-UHFFFAOYNA-N	CC(C)CC1N=C(O)C2CCCN2C1=O	3.2728	0.00049729	0.978532
1849	Positive	8.347	494.359	Unknown	[M+H]+	null	null	null	null	0.33649	0.00050175	1.23506
1850	Positive	14.38	341.329	Unknown	[M+H]+	null	null	null	null	748.29	0.00050195	1.4351
1851	Positive	13.934	359.342	Unknown	[M+H]+	null	null	null	null	107.59	0.00050406	1.57638
1852	Positive	8.534	522.139	Unknown	[M+H]+	null	null	null	null	6.7707	0.00051185	1.26464
1853	Positive	0.677	276.822	Unknown	[M+H]+	null	null	null	null	115.9	0.00051351	1.61479
1854	Positive	1.023	682.853	no MS2: phytic acid	[M+Na]+	C6H18O24P6	Inositol phosphates	IMQLKJBTEOYOSI-UHFFFAOYSA-N	O=P(O)(O)OC1C(OP(=O)(O)O)C(OP(=O)(O)O)C(OP(=O)(O)O)C(OP(=O)(O)O)C1OP(=O)(O)O	29.467	0.00051356	1.5157
1855	Positive	0.244	371.126	no MS2: 1-[2-hydroxy-4-(3-hydroxy-5-methylphenoxy)-6-methylphenyl]-3-methylbutane-2,3-diol	[M+K]+	C19H24O5	Diphenylethers	FLLRZSQAKUHACV-UHFFFAOYSA-N	OC=1C=C(OC2=CC(O)=C(C(=C2)C)CC(O)C(O)(C)C)C=C(C1)C	45.735	0.00051468	1.50114
1856	Positive	1.198	206.068	low score: (+/-)-alpha-lipoic acid amide	[M+H]+	C8H15NOS2	Lipoamides	FCCDDURTIIUXBY-SSDOTTSWSA-N	O=C(N)CCCCC1SSCC1	0.44342	0.00051498	1.18967
1857	Positive	8.504	453.199	low score: (1R,5S)-3-(1-oxo-2-(pyridin-4-ylmethyl)-1,2-dihydroisoquinoline-4-carbonyl)-3,4,5,6-tetrahydro-1H-1,5-methanopyrido[1,2-a][1,5]diazocin-8(2H)-one	[M+H]+	C27H24N4O3	Cytisine and derivatives	HRIXOCFMOJEHEU-UXHICEINSA-N	O=C1C=CC=C2N1CC3CN(C(=O)C4=CN(C(=O)C=5C=CC=CC54)CC=6C=CN=CC6)CC2C3	0.26907	0.00051593	1.08987
1858	Positive	9.529	114.102	low score: Unknown (carbon number 6); PlaSMA ID-45	[M+H]+	C6H11NO	Unknown	null	null	6.9342	0.00051633	1.62537
1859	Negative	7.041	574.215	low score: Zafirlukast	[M-H]-	C31H33N3O6S	Benzenesulfonamides	YEEZWCHGZNKEEK-UHFFFAOYSA-N	O=S(=O)(N=C(O)C1=CC=C(C(OC)=C1)CC2=CN(C=3C=CC(N=C(O)OC4CCCC4)=CC32)C)C=5C=CC=CC5C	0.14707	0.00051633	1.25612
1860	Positive	0.351	236.907	Unknown	[M+H]+	null	null	null	null	18.94	0.00052019	1.15459
1861	Positive	14.285	369.375	low score: tetracosanoic acid	[M+H]+	C24H48O2	Very long-chain fatty acids	QZZGJDVWLFXDLK-UHFFFAOYSA-N	O=C(O)CCCCCCCCCCCCCCCCCCCCCCC	4.7342	0.00052079	1.15601
1862	Positive	16.588	531.447	Unknown	[M+H]+	null	null	null	null	0.34026	0.00052303	1.53017
1863	Positive	1.101	313.225	no MS2: (Z)-pregna-4,17(20)-diene-3,16-dione	[M+H-H2O]+	C21H28O2	Androgens and derivatives	WDXRGPWQVHZTQJ-RHIZAWHPSA-N	O=C1C=C2CCC3C4CC(=O)C(=CC)C4(C)CCC3C2(C)CC1	8.1608	0.00052303	1.59666
1864	Positive	1.022	446.921	Unknown	[M+H]+	null	null	null	null	5.0654	0.00052303	1.4242
1865	Positive	1.048	858.736	Unknown	[M+H]+	null	null	null	null	20.16	0.0005264	1.40509
1866	Positive	14.312	373.125	no MS2: NCGC00381050-01!7-(5,7-dimethoxy-4-oxochromen-2-yl)-6-hydroxyheptanoic acid [IIN-based on: CCMSLIB00000845870]	[M+Na]+	C18H22O7	Chromones	CRHUZHVITSVUHQ-UHFFFAOYSA-N	COC1=CC(OC)=C2C(=O)C=C(CC(O)CCCCC(O)=O)OC2=C1	28.073	0.00052769	1.1332
1867	Negative	1.098	706.562	Unknown	[M-H]-	null	null	null	null	0.39862	0.00052769	1.10027
1868	Positive	12.373	305.27	Unknown	[M+H]+	null	null	null	null	44.902	0.00053047	1.1396
1869	Positive	1.267	489.151	no MS2: NCGC00381275-02!(2,5-dibenzoyloxy-1,6-dihydroxycyclohex-3-en-1-yl)methyl benzoate	[M+H]+	C28H24O8	Benzoic acid esters	UEYWXBQABUNMMN-UHFFFAOYSA-N	OC1C(OC(=O)C2=CC=CC=C2)C=CC(OC(=O)C3=CC=CC=C3)C1(O)COC(=O)C4=CC=CC=C4	27.087	0.00053055	1.44858
1870	Positive	14.113	124.096	no MS2: HISTIDINOL	[M-H2O+H]+	C6H11N3O	Aralkylamines	ZQISRDCJNBUVMM-YFKPBYRVSA-N	N[C@H](CO)CC1=CN=CN1	8.1374	0.00053113	1.70439
1871	Positive	1.745	113.962	Unknown	[M+H]+	null	null	null	null	4.532	0.00053149	0.974931
1872	Positive	0.631	610.235	no MS2: (DAG)(NAM)-A	[M+H]+	C24H39N3O15	Acylaminosugars	HLDKMGBIINYSCX-UHFFFAOYSA-N	CC(=O)NC1C(OC2C(CO)OC(O)C(NC(C)=O)C2OC(C)C(=O)NC(C)C(=O)O)OC(COC(C)=O)C(O)C1O	0.43346	0.00053503	1.03756
1873	Positive	0.425	312.214	no MS2: 3-oxo-C13-HSL	[M+ACN+H]+	C17H29NO4	N-acyl-alpha amino acids and derivatives	BDKVLVHIBJWMJU-HNNXBMFYSA-N	O=C(CC(N[C@@H]1C(OCC1)=O)=O)CCCCCCCCCC	7.129	0.00053617	1.39038
1874	Positive	8.998	773.02	Unknown	[M+H]+	null	null	null	null	24.207	0.00053698	1.69506
1875	Positive	0.823	145.939	Unknown	[M+H]+	null	null	null	null	11.7	0.00053763	1.51208
1876	Positive	8.555	522.69	Unknown	[M+H]+	null	null	null	null	7.306	0.00053884	1.31985
1877	Positive	0.428	204.904	Unknown	[M+H]+	null	null	null	null	14.956	0.00053935	1.53377
1878	Positive	1.022	498.935	Unknown	[M+H]+	null	null	null	null	17.185	0.00054055	1.6546
1879	Positive	16.944	707.216	low score: NCGC00381236-01![(2S,3S,4R,5R,6R)-5-acetyloxy-3-hydroxy-2-methyl-6-[[(2R,3S,4S,5R,6S)-3,4,5-trihydroxy-6-[5-hydroxy-6-methoxy-2-(4-methoxyphenyl)-4-oxochromen-7-yl]oxyoxan-2-yl]methoxy]oxan-4-yl] acetate	[M+H]+	C33H38O17	Flavonoid-7-O-glycosides	ZVMMEKFQYNWINU-OWCJGASRSA-N	COC1=CC=C(C=C1)C2=CC(=O)C3=C(O)C(OC)=C(O[C@@H]4O[C@H](CO[C@@H]5O[C@@H](C)[C@H](O)[C@@H](OC(C)=O)[C@H]5OC(C)=O)[C@@H](O)[C@H](O)[C@H]4O)C=C3O2	20.216	0.00054073	1.53293
1880	Positive	8.758	518.359	Unknown	[M+H]+	null	null	null	null	15.992	0.00054073	1.5737
1881	Positive	1.091	872.714	Unknown	[M+H]+	null	null	null	null	3.5328	0.00054084	1.22902
1882	Positive	9.007	497.042	Unknown	[M+H]+	null	null	null	null	6.6778	0.00054364	1.3581
1883	Positive	10.709	279.185	low score: NCGC00385848-01_C19H24N2O_(3alpha,14alpha,16alpha)-14,15-Dihydroeburnamenin-14-ol	[M-H2O+H]+	C19H24N2O	Eburnan-type alkaloids	HONLKDDLTAZVQV-UHFFFAOYSA-N	CCC12CCCN3CCC4=C(C13)[N](C(O)C2)C5=CC=CC=C45	0.46097	0.00054436	1.15282
1884	Positive	19.029	516.459	Unknown	[M+H]+	null	null	null	null	0.38023	0.00054462	1.44222
1885	Positive	10.479	815.072	Unknown	[M+H]+	null	null	null	null	14.215	0.00054557	1.37124
1886	Positive	1.052	622.801	Unknown	[M+H]+	null	null	null	null	6.1567	0.00054564	1.35754
1887	Positive	8.937	527.334	low score: madecassic acid	[M+Na]+	C30H48O6	Triterpenoids	PRAUVHZJPXOEIF-PHCWQIJGSA-N	O=C(O)C12CCC(C)C(C)C2C3=CCC4C5(C)CC(O)C(O)C(C)(CO)C5C(O)CC4(C)C3(C)CC1	6.3425	0.00054564	1.03479
1888	Negative	0.911	307.136	low score: Caffeoyl lysine	[M-H]-	C15H20N2O5	Hydroxycinnamic acids and derivatives	WVFMZTORJFNZPK-UHFFFAOYSA-N	NC(CCCCNC(=O)C=CC1=CC(O)=C(O)C=C1)C(O)=O	0.30504	0.00054924	1.26067
1889	Positive	1.028	242.943	Unknown	[M+H]+	null	null	null	null	5.9419	0.00054954	1.50768
1890	Positive	18.456	373.125	no MS2: NCGC00381050-01!7-(5,7-dimethoxy-4-oxochromen-2-yl)-6-hydroxyheptanoic acid [IIN-based on: CCMSLIB00000845870]	[M+Na]+	C18H22O7	Chromones	CRHUZHVITSVUHQ-UHFFFAOYSA-N	COC1=CC(OC)=C2C(=O)C=C(CC(O)CCCCC(O)=O)OC2=C1	55.653	0.00055135	1.03216
1891	Positive	1.083	976.656	Unknown	[M+H]+	null	null	null	null	4.4397	0.00055135	1.19282
1892	Positive	8.446	484.314	low score: Taurolithocholate	[M+H]+	C26H45NO5S	Taurinated bile acids and derivatives	QBYUNVOYXHFVKC-GBURMNQMSA-N	C[C@H](CC/C(=N/CCS(=O)(=O)O)/O)[C@H]1CC[C@@H]2[C@@]1(CC[C@H]3[C@H]2CC[C@H]4[C@@]3(CC[C@H](C4)O)C)C	7.8413	0.00055162	1.08786
1893	Positive	9	499.09	no MS2: Scutellarin methyl ester	[M+Na]+	C22H20O12	Flavonoid-7-O-glucuronides	LNIVUWPCHRNJLG-SXFAUFNYSA-N	O=C1C=C(OC2=CC(OC3OC(C(=O)OC)C(O)C(O)C3O)=C(O)C(O)=C12)C=4C=CC(O)=CC4	6.626	0.00055244	1.29598
1894	Positive	0.674	339.163	low score: Bergamottin	[M+H]+	C21H22O4	Terpene lactones	DBMJZOMNXBSRED-OQLLNIDSSA-N	O=C1OC=2C=C3OC=CC3=C(OCC=C(C)CCC=C(C)C)C2C=C1	9.197	0.00055518	1.36659
1895	Positive	8.529	522.54	Unknown	[M+H]+	null	null	null	null	6.9568	0.00055518	1.47102
1896	Positive	1.077	678.774	Unknown	[M+H]+	null	null	null	null	3.299	0.00055812	1.27089
1897	Positive	12.814	512.544	Unknown	[M+H]+	null	null	null	null	49.429	0.00056543	1.43954
1898	Negative	1.262	678.205	Unknown	[M-H]-	null	null	null	null	0.12708	0.00056647	1.19171
1899	Positive	1.065	801.849	Unknown	[M+H]+	null	null	null	null	4.2192	0.00056713	1.31663
1900	Positive	12.864	379.31	conessine	[M+Na]+	C24H40N2	Conanine-type alkaloids	GPLGAQQQNWMVMM-CYFNKAHPSA-N	C1=C2CC(N(C)C)CCC2(C)C3CCC45CN(C)C(C)C5CCC4C3C1	15.426	0.00056948	1.33862
1901	Positive	1.068	680.769	Unknown	[M+H]+	null	null	null	null	5.4031	0.00056981	1.09445
1902	Positive	13.601	153.128	10-HYDROXYDECANOATE	[M-2H2O+H]+	C10H20O3	Medium-chain hydroxy acids and derivatives	YJCJVMMDTBEITC-UHFFFAOYSA-N	C(CCCCC(=O)O)CCCCO	7.9757	0.00057163	1.06502
1903	Positive	1.017	886.831	Unknown	[M+H]+	null	null	null	null	16.612	0.00057204	1.52423
1904	Positive	0.367	295.188	low score: MMV021013	[M+H]+	C18H22N4	Pyridinylpyrimidines	TVBQRAPNJPDSJM-UHFFFAOYSA-N	N1=CC=CC=C1C2=NC(=CC(=NC3CCCCC3)N2)C4CC4	3.0731	0.0005731	1.06775
1905	Positive	13.497	297.261	no MS2: 2-(N-butylpropionamido)-N-cyclohexylbutanamide	[M+H]+	C17H32N2O2	Tertiary carboxylic acid amides	QMXGNDITXNMQEK-UHFFFAOYSA-N	CCCCN(C(=O)CC)C(CC)C(=O)NC1CCCCC1	14.852	0.00057314	1.57053
1906	Positive	14.327	297.26	no MS2: 2-(N-butylpropionamido)-N-cyclohexylbutanamide	[M+H]+	C17H32N2O2	Tertiary carboxylic acid amides	QMXGNDITXNMQEK-UHFFFAOYSA-N	CCCCN(C(=O)CC)C(CC)C(=O)NC1CCCCC1	14.52	0.00058244	1.4149
1907	Positive	8.233	330.361	Unknown	[M+H]+	null	null	null	null	523.87	0.00058591	1.67363
1908	Positive	8.369	548.315	low score: (2S,3R,5S,9R)-2,3-dihydroxy-14-(hydroxymethyl)-5,9-dimethyl-14-{[(2S,3R,4S,5S,6R)-3,4,5-trihydroxy-6-(hydroxymethyl)oxan-2-yl]oxy}tetracyclo[11.2.1.0?,??.0?,?]hexadecane-5-carboxylic acid	[M+NH4]+	C26H42O11	Diterpene glycosides	QUCGBWQRLWOVBR-BBJJSLPGSA-N	O=C(O)C1(C)CCCC2(C)C3CCC4CC3(CC4(OC5OC(CO)C(O)C(O)C5O)CO)C(O)C(O)C12	13.235	0.00058658	1.25191
1909	Positive	1.258	524.132	no MS2: 2-(3-(3-(3,4-dimethoxyphenyl)-4,8-dioxo-4,8,9,10-tetrahydropyrano[2,3-f]chromen-10-yl)phenoxy)acetamide	[M+Na]+	C28H23NO8	Pyranoisoflavonoids	IUQOJESNSFQLHI-UHFFFAOYSA-N	O=C1OC2=CC=C3C(=O)C(=COC3=C2C(C=4C=CC=C(OCC(=O)N)C4)C1)C=5C=CC(OC)=C(OC)C5	34.012	0.00058891	1.36512
1910	Positive	8.994	991.745	Unknown	[M+H]+	null	null	null	null	218.5	0.00058891	1.55763
1911	Positive	1.089	850.755	Unknown	[M+H]+	null	null	null	null	3.8445	0.0005893	1.22654
1912	Positive	8.572	603.339	low score: NCGC00381318-01![3-methyl-1-[3-methyl-1-[3-methyl-1-oxo-1-(2,3,4,5,6-pentahydroxyhexoxy)pentan-2-yl]oxy-1-oxopentan-2-yl]oxy-1-oxopentan-2-yl] 2-hydroxy-3-methylpentanoate [IIN-based on: CCMSLIB00000845116]	[M-2H2O+H]+	C30H54O14	Depsipeptides	XHFZCGJKWBSHAG-UHFFFAOYSA-N	CCC(C)C(O)C(=O)OC(C(C)CC)C(=O)OC(C(C)CC)C(=O)OC(C(C)CC)C(=O)OCC(O)C(O)C(O)C(O)CO	6.7344	0.00059066	1.42114
1913	Positive	14.324	593.204	no MS2: Pantethine	[M+K]+	C22H42N4O8S2	Beta amino acids and derivatives	DJWYOLJPSHDSAL-UHFFFAOYSA-N	OC(=NCCSSCCN=C(O)CCN=C(O)C(O)C(C)(C)CO)CCN=C(O)C(O)C(C)(C)CO	44.586	0.00059141	1.27583
1914	Positive	13.892	402.389	Unknown	[M+H]+	null	null	null	null	0.30708	0.00059141	1.22013
1915	Positive	1.114	702.695	Unknown	[M+H]+	null	null	null	null	4.5316	0.00059462	0.999176
1916	Positive	0.666	107.912	Unknown	[M+H]+	null	null	null	null	31.096	0.00059549	1.52239
1917	Positive	12.127	448.321	Unknown	[M+H]+	null	null	null	null	0.35009	0.00059706	1.50065
1918	Positive	8.373	526.329	low score: NCGC00380724-01_C28H47NO8_(3R,5R,6S,7S,9R,11E,13S,14R)-14-Ethyl-13-hydroxy-3,5,7,9,13-pentamethyl-2,4,10-trioxooxacyclotetradec-11-en-6-yl 3,4,6-trideoxy-3-(dimethylamino)-D-xylo-hexopyranoside	[M+H]+	C28H47NO8	Aminoglycosides	UZQBOFAUUTZOQE-SOSMEOBRSA-N	CC[C@H]1OC(=O)[C@H](C)C(=O)[C@H](C)[C@@H](OC2O[C@H](C)C[C@@H]([C@H]2O)N(C)C)[C@@H](C)C[C@@H](C)C(=O)\C=C\[C@]1(C)O	63.74	0.00059759	1.38965
1919	Positive	1.06	814.763	Unknown	[M+H]+	null	null	null	null	4.1399	0.00059801	1.47286
1920	Positive	1.032	936.764	Unknown	[M+H]+	null	null	null	null	21.683	0.00059801	1.36035
1921	Positive	1.052	646.948	Unknown	[M+H]+	null	null	null	null	4.3336	0.0005988	1.03914
1922	Positive	1.037	758.788	Unknown	[M+H]+	null	null	null	null	6.8193	0.00059897	1.13154
1923	Positive	8.755	991.745	Unknown	[M+H]+	null	null	null	null	133.52	0.00059897	1.46511
1924	Positive	0.781	110.92	Unknown	[M+H]+	null	null	null	null	36.146	0.00060341	1.50807
1925	Positive	8.33	521.409	Unknown	[M+H]+	null	null	null	null	68.205	0.00060428	1.43917
1926	Positive	6.578	382.27	low score: Sphinganine 1-phosphate	[M+H]+	C18H40NO5P	Phosphosphingolipids	YHEDRJPUIRMZMP-ZWKOTPCHSA-N	CCCCCCCCCCCCCCC[C@H]([C@H](COP(=O)(O)O)N)O	2.5134	0.00060441	1.32792
1927	Positive	1.059	746.763	Unknown	[M+H]+	null	null	null	null	4.666	0.00060606	1.1154
1928	Positive	10.18	524.408	Unknown	[M+H]+	null	null	null	null	152.39	0.00060712	1.51896
1929	Positive	10.761	285.264	low score: h_69_calusterone-m	[M-2H2O+H]+	C21H36O2	Androgens and derivatives	ZWQUPIDNCOVROC-AAPLZEPBSA-N	OC1CC[C@@]2(C)C(C[C@H](C)C3C2CC[C@@]4(C)C3CC[C@]4(C)O)C1	7.4496	0.00061095	1.37042
1930	Positive	7.826	380.291	Unknown	[M+H]+	null	null	null	null	0.46102	0.00061581	1.18057
1931	Positive	1.039	606.829	Unknown	[M+H]+	null	null	null	null	16.226	0.00061747	1.36899
1932	Positive	1.029	490.906	Unknown	[M+H]+	null	null	null	null	10.035	0.00061946	1.44047
1933	Positive	13.723	247.184	no MS2: Milnacipran	[M+H]+	C15H22N2O	Phenylacetamides	GJJFMKBJSRMPLA-HIFRSBDPSA-N	O=C(N(CC)CC)C1(C=2C=CC=CC2)CC1CN	40.592	0.00062044	1.60549
1934	Positive	1.073	937.842	Unknown	[M+H]+	null	null	null	null	3.9196	0.00062044	0.952292
1935	Positive	0.672	284.068	no MS2: Pesticide6_Penconazole_C13H15Cl2N3_1H-1,2,4-Triazole, 1-[2-(2,4-dichlorophenyl)pentyl]-	[M+H]+	C13H15Cl2N3	Dichlorobenzenes	WKBPZYKAUNRMKP-UHFFFAOYSA-N	CCCC(CN1C=NC=N1)C2=C(C=C(C=C2)Cl)Cl	2.2871	0.00062178	1.20814
1936	Negative	6.734	624.155	Unknown	[M-H]-	null	null	null	null	0.15327	0.00062308	1.23402
1937	Positive	14.304	376.37	Unknown	[M+H]+	null	null	null	null	106.37	0.00062684	1.28894
1938	Positive	7.597	343.321	Unknown	[M+H]+	null	null	null	null	43.119	0.00062684	1.43265
1939	Positive	19.006	781.246	methyl (2S,3R,4S)-3-ethenyl-4-[(Z)-3-[(2S,3R,4R)-3-ethenyl-5-methoxycarbonyl-2-[(2S,3R,4S,5S,6R)-3,4,5-trihydroxy-6-(hydroxymethyl)oxan-2-yl]oxy-3,4-dihydro-2H-pyran-4-yl]-4-oxobut-2-enyl]-2-[(2S,3R,4S,5S,6R)-3,4,5-trihydroxy-6-(hydroxymethyl)oxan-2-yl]oxy-3,4-dihydro-2H-pyran-5-carboxylate	[M+Na]+	C34H46O19	Terpene glycosides	MWLKXILGJPSPKZ-LWSBBEHMSA-N	O=CC(=CCC1C(=COC(OC2OC(CO)C(O)C(O)C2O)C1C=C)C(=O)OC)C3C(=COC(OC4OC(CO)C(O)C(O)C4O)C3C=C)C(=O)OC	8.2199	0.00062772	1.44342
1940	Positive	14.302	341.33	low score: docosanoic acid	[M+H]+	C22H44O2	Very long-chain fatty acids	UKMSUNONTOPOIO-UHFFFAOYSA-N	O=C(O)CCCCCCCCCCCCCCCCCCCCC	740.38	0.00062854	1.49069
1941	Positive	19.361	824.576	Unknown	[M+H]+	null	null	null	null	0.35456	0.00063032	1.59406
1942	Positive	9.048	596.312	low score: Chymostatinol A	[M+H]+	C30H41N7O6	Peptides	KUKQXNQRXXTUEM-UHFFFAOYSA-N	N=C(NCC1)NC1C(NC(NC(CC2=CC=CC=C2)C(O)=O)=O)C(NC(C(C)C)C(NC(CO)CC3=CC=CC=C3)=O)=O	5.4171	0.0006323	1.2373
1943	Positive	9.416	527.358	low score: hemiasterlin	[M+H]+	C30H46N4O4	Dipeptides	KQODQNJLJQHFQV-MNDPQUGUSA-N	CC(C(N(C(C(NC(C(NC)C(C)(C(C1=CC=CC=C12)=CN2C)C)=O)C(C)(C)C)=O)C)/C=C(C(O)=O)/C)C	2.3912	0.0006323	1.2628
1944	Positive	9.006	988.655	Unknown	[M+H]+	null	null	null	null	5.699	0.0006328	1.26281
1945	Positive	16.221	850.307	Unknown	[M+H]+	null	null	null	null	52.368	0.00063313	1.09324
1946	Positive	0.291	519.175	no MS2: [(2S,3S,4R,5R)-4-hydroxy-2,5-bis(hydroxymethyl)-2-[(2R,3R,4S,5S,6R)-3,4,5-trihydroxy-6-(hydroxymethyl)oxan-2-yl]oxyoxolan-3-yl] (E)-3-(4-hydroxy-3-methoxyphenyl)prop-2-enoate	[M+H]+	C22H30O14	Coumaric acids and derivatives	ZPEADZHVGOCGKH-YQTDNFGYSA-N	O=C(OC1C(O)C(OC1(OC2OC(CO)C(O)C(O)C2O)CO)CO)C=CC3=CC=C(O)C(OC)=C3	48.92	0.00063567	1.3451
1947	Positive	18.433	357.092	no MS2: Aldehydoisoophiopogonanone A, 6-	[M+H]+	C19H16O7	Homoisoflavanones	BXBGUZJWTCKDJY-LLVKDONJSA-N	O=CC=1C(O)=C2C(=O)C(COC2=C(C1O)C)CC3=CC=C4OCOC4=C3	25.201	0.00063739	1.06134
1948	Positive	8.545	522.275	no MS2: Aconine	[M+Na]+	C25H41NO9	Aconitane-type diterpenoid alkaloids	SQMGCPHFHQGPIF-YIGCTVLISA-N	OC1CC(OC)C23C4N(CC)CC1(COC)C3C(OC)C4C5(O)C(O)C(OC)C6(O)CC2C5C6O	5.7245	0.00063814	0.943761
1949	Positive	1.206	267.154	Sambucinol	[M+H]+	C15H22O4	Oxepanes	GFLMBFRNOPTZDK-CMBQYIQPSA-N	CC1=C[C@]23[C@](CC1)([C@]4(C[C@@H]([C@H]([C@]4(O2)CO)O3)O)C)C	0.45233	0.00064129	1.20779
1950	Positive	0.424	186.991	no MS2: D-(-)-3-PHOSPHOGLYCERIC ACID	[M+ACN+Na]+	C3H7O7P	Sugar acids and derivatives	OSJPPGNTCRNQQC-UHFFFAOYSA-N	C(C(C(=O)O)O)OP(=O)(O)O	22.141	0.00064305	1.25208
1951	Positive	9.416	576.323	no MS2: NCGC00380641-01!5-[[4-[5-[[4-[5-[acetyl(hydroxy)amino]pentylamino]-4-oxobutanoyl]-hydroxyamino]pentylamino]-4-oxobutanoyl]-hydroxyamino]pentanoic acid	[M+H]+	C25H45N5O10	N-acyl amines	ZMCWALAQRPULMT-UHFFFAOYSA-N	CC(=O)N(O)CCCCCNC(=O)CCC(=O)N(O)CCCCCNC(=O)CCC(=O)N(O)CCCCC(O)=O	3.3834	0.00064495	0.995132
1952	Positive	12.36	124.096	no MS2: HISTIDINOL	[M-H2O+H]+	C6H11N3O	Aralkylamines	ZQISRDCJNBUVMM-YFKPBYRVSA-N	N[C@H](CO)CC1=CN=CN1	4.4936	0.00064685	1.58954
1953	Positive	10.495	524.824	Unknown	[M+H]+	null	null	null	null	7.6617	0.00064912	1.07334
1954	Positive	6.145	124.096	HISTIDINOL	[M-H2O+H]+	C6H11N3O	Aralkylamines	ZQISRDCJNBUVMM-YFKPBYRVSA-N	N[C@H](CO)CC1=CN=CN1	2.2005	0.00065177	1.47586
1955	Positive	7.81	488.334	Unknown	[M+H]+	null	null	null	null	39.513	0.00065355	1.32415
1956	Positive	6.346	384.25	low score: NCGC00380312-01_C24H35NO4_	[M-H2O+H]+	C24H35NO4	Isoindolones	NDJDZINMNBVVHS-UHFFFAOYSA-N	CC(C)CC1NC(=O)C23OC(=O)\C=C\CC(O)CCC(=C\C2\C=C(C)/C(C)C13)\C	2.8511	0.00065355	1.24557
1957	Positive	1.021	640.865	Unknown	[M+H]+	null	null	null	null	6.3467	0.00065801	1.19569
1958	Positive	0.428	430.732	Unknown	[M+H]+	null	null	null	null	23.321	0.00065872	1.43072
1959	Positive	13.405	327.314	Unknown	[M+H]+	null	null	null	null	6.928	0.00066115	1.11911
1960	Positive	13.475	393.237	low score: monolinolein	[M+K]+	C21H38O4	Lineolic acids and derivatives	WECGLUPZRHILCT-HZJYTTRNSA-N	O=C(OCC(O)CO)CCCCCCCC=CCC=CCCCCC	0.39036	0.0006621	1.45906
1961	Positive	0.792	108.922	Unknown	[M+H]+	null	null	null	null	70.537	0.00066233	1.49089
1962	Positive	1.022	626.889	Unknown	[M+H]+	null	null	null	null	12.265	0.00066543	1.44947
1963	Positive	8.996	494.838	Unknown	[M+H]+	null	null	null	null	9.9817	0.00066743	1.40289
1964	Positive	0.592	243.825	Unknown	[M+H]+	null	null	null	null	30.686	0.0006685	1.51102
1965	Positive	16.139	338.367	Unknown	[M+H]+	null	null	null	null	221.7	0.00066946	1.35263
1966	Positive	8.524	808.024	Unknown	[M+H]+	null	null	null	null	6.6174	0.00066946	1.27771
1967	Negative	7.04	642.126	Unknown	[M-H]-	null	null	null	null	0.185	0.00067162	1.26177
1968	Positive	19.22	373.124	no MS2: NCGC00381050-01!7-(5,7-dimethoxy-4-oxochromen-2-yl)-6-hydroxyheptanoic acid [IIN-based on: CCMSLIB00000845870]	[M+Na]+	C18H22O7	Chromones	CRHUZHVITSVUHQ-UHFFFAOYSA-N	COC1=CC(OC)=C2C(=O)C=C(CC(O)CCCCC(O)=O)OC2=C1	39.584	0.00067315	1.09503
1969	Positive	0.402	216.032	no MS2: 2-Aminosulfonyl-benzoic acid methyl ester	[M+H]+	C8H9NO4S	Benzoic acid esters	VSOOBQALJVLTBH-UHFFFAOYSA-N	COC(C1=C(S(=O)(N)=O)C=CC=C1)=O	7.2169	0.00067531	1.12363
1970	Positive	1.019	896.86	no MS2: (NAG)(NAM)-AemA;(G-G)-(NAG)(NAM)[r]-Aem	[M+2H]2+	C71H117N13O40	Oligopeptides	TYSDIIIOAAJYCL-UHFFFAOYSA-N	CC(=O)NC(CO)C(OC(C)C(=O)NC(C)C(=O)NC(CCC(=O)NC(CCCC(N)C(=O)O)C(=O)O)C(=O)O)C(OC1OC(CO)C(OC2OC(CO)C(OC3OC(CO)C(O)C(O)C3NC(C)=O)C(OC(C)C(=O)NC(C)C(=O)NC(CCC(=O)NC(CCCC(N)C(=O)O)C(=O)NC(C)C(=O)O)C(=O)O)C2NC(C)=O)C(O)C1NC(C)=O)C(O)CO	16.778	0.00067553	1.43715
1971	Negative	7.852	413.225	low score: Unknown (carbon number 21); PlaSMA ID-1051	[M-H]-	C21H34O8	Unknown	null	null	0.3594	0.00067595	1.33083
1972	Positive	1.073	916.699	Unknown	[M+H]+	null	null	null	null	11.125	0.0006761	1.35702
1973	Positive	1.023	558.895	Unknown	[M+H]+	null	null	null	null	10.529	0.00067995	1.55327
1974	Positive	8.579	520.181	no MS2: NCGC00380203-01_C26H30ClNO8_2-{7-Acetoxy-5-chloro-3-[(1E,3E)-3,5-dimethyl-1,3-heptadien-1-yl]-7-methyl-6,8-dioxo-7,8-dihydro-2(6H)-isoquinolinyl}pentanedioic acid	[M+H]+	C26H30ClNO8	Glutamic acid and derivatives	BVIXPBFQDINHQZ-XHBXSBNISA-N	CCC(C)\C=C(C)\C=C\C1=C\C/2=C(Cl)/C(=O)C(C)(OC(C)=O)C(=O)C2=C\N1C(CCC(O)=O)C(O)=O	6.5845	0.00068073	1.26444
1975	Positive	8.594	521.969	Unknown	[M+H]+	null	null	null	null	9.8511	0.00068457	1.42505
1976	Positive	15.564	628.419	Unknown	[M+H]+	null	null	null	null	2.2316	0.00068492	1.13041
1977	Positive	14.026	359.34	Unknown	[M+H]+	null	null	null	null	151.86	0.00068557	1.37582
1978	Positive	0.473	422.818	Unknown	[M+H]+	null	null	null	null	12.306	0.00068845	0.944805
1979	Positive	13.601	823.567	Unknown	[M+H]+	null	null	null	null	2.9712	0.00068899	1.00585
1980	Positive	0.442	273.848	Unknown	[M+H]+	null	null	null	null	64.094	0.00068994	1.31421
1981	Positive	14.301	267.288	Unknown	[M+H]+	null	null	null	null	288.79	0.00069279	1.35605
1982	Positive	0.43	358.865	Unknown	[M+H]+	null	null	null	null	8.4014	0.00069329	1.11009
1983	Positive	14.026	381.324	Unknown	[M+H]+	null	null	null	null	17.075	0.00069386	1.25158
1984	Positive	1.027	740.816	Unknown	[M+H]+	null	null	null	null	23.202	0.0006952	1.40296
1985	Positive	5.886	247.185	low score: Sophocarpine	[M+H]+	C15H22N2O	Matrine alkaloids	AAGFPTSOPGCENQ-JLNYLFASSA-N	C1C[C@H]2CN3[C@H](CC=CC3=O)[C@@H]4[C@H]2N(C1)CCC4	8.6094	0.00069579	1.47217
1986	Positive	18.411	355.095	no MS2: [1-hydroxy-1-(4-methoxyphenyl)propan-2-yl] 4-methoxybenzoate	[M+K]+	C18H20O5	P-methoxybenzoic acids and derivatives	MHJLKHNHGMUAPQ-UHFFFAOYSA-N	O=C(OC(C)C(O)C1=CC=C(OC)C=C1)C2=CC=C(OC)C=C2	34.479	0.00069947	1.12444
1987	Positive	0.176	609.392	Unknown	[M+H]+	null	null	null	null	0.17974	0.00070485	1.1666
1988	Positive	8.994	512.371	Unknown	[M+H]+	null	null	null	null	3.418	0.00070678	1.08909
1989	Positive	13.685	559.164	low score: (2S,3R,4S,5S,6R)-2-[4-[(3R,3aS,6S,6aR)-3a-hydroxy-3-(4-hydroxy-3-methoxyphenyl)-3,4,6,6a-tetrahydro-1H-furo[3,4-c]furan-6-yl]-2-methoxyphenoxy]-6-(hydroxymethyl)oxane-3,4,5-triol	[M+Na]+	C26H32O12	Lignan glycosides	GQLQVPZSTWXDBQ-ZOKOZUFBSA-N	OC1=CC=C(C=C1OC)C2OCC3C(OCC23O)C4=CC=C(OC5OC(CO)C(O)C(O)C5O)C(OC)=C4	17.577	0.0007093	1.35772
1990	Positive	8.755	554.428	low score: NCGC00384949-01!2-(hydroxymethyl)-6-(2,20,21-trihydroxydocosan-3-yloxy)oxane-3,4,5-triol	[M+NH4]+	C28H56O9	Fatty acyl glycosides of mono- and disaccharides	IKQSIKPOUMLPKK-UHFFFAOYSA-N	CC(O)C(O)CCCCCCCCCCCCCCCCC(OC1OC(CO)C(O)C(O)C1O)C(C)O	17.674	0.00071007	1.24342
1991	Positive	13.951	124.097	HISTIDINOL	[M-H2O+H]+	C6H11N3O	Aralkylamines	ZQISRDCJNBUVMM-YFKPBYRVSA-N	N[C@H](CO)CC1=CN=CN1	7.9516	0.00071053	1.66171
1992	Positive	13.505	354.218	no MS2: Methysergide	[M+H]+	C21H27N3O2	Lysergamides	KPJZHOPZRAFDTN-ZRGWGRIASA-N	CCC(CO)NC(=O)C(C4)C=C(C(N(C)4)1)c(c3)c(c(cc3)2)c(cn(C)2)C1	7.336	0.00071643	1.20101
1993	Positive	14.493	124.096	HISTIDINOL	[M-H2O+H]+	C6H11N3O	Aralkylamines	ZQISRDCJNBUVMM-YFKPBYRVSA-N	N[C@H](CO)CC1=CN=CN1	8.5611	0.00071818	1.63385
1994	Positive	0.365	215.14	low score: Unknown (carbon number 10); PlaSMA ID-798	[M+H]+	C10H18N2O3	Unknown	null	null	3.7094	0.00071818	1.54767
1995	Positive	9.025	521.176	Unknown	[M+H]+	null	null	null	null	3.2109	0.0007191	0.948077
1996	Positive	1.041	940.765	Unknown	[M+H]+	null	null	null	null	3.1067	0.00072067	1.24767
1997	Positive	0.479	202.814	Unknown	[M+H]+	null	null	null	null	17.84	0.00072165	1.39203
1998	Positive	1.041	902.814	no MS2: Glyceryl trioleate	[M+NH4]+	C57H104O6	Triacylglycerols	PHYFQTYBJUILEZ-IUPFWZBJSA-N	CCCCCCCC/C=C\CCCCCCCC(=O)OCC(OC(=O)CCCCCCC/C=C\CCCCCCCC)COC(=O)CCCCCCC/C=C\CCCCCCCC	5.3656	0.00072222	1.01173
[truncated: 1,884 more rows]
